# Supplementary material
Source: PubMed Central journal article supplement (PMC7656239)
Supplement: NIHMS1638547-supplement-Supporitng_Figures.pdf [file NIHMS1638547-supplement-Supporitng_Figures.pdf]

## SUPPORTING INFORMATION FIGURES

---

Supporting Information Figure 1

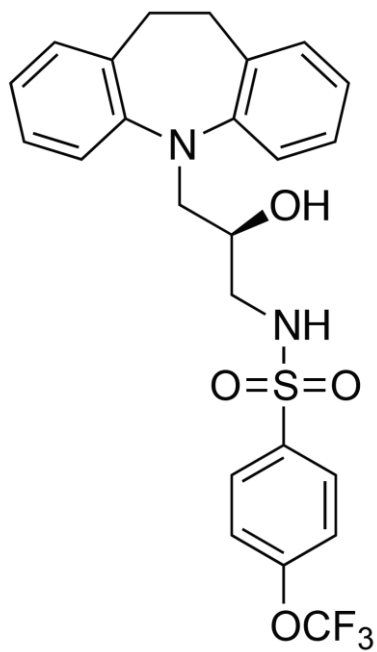

Supporting Information Figure 1. Chemical structure of TRC-794.

## Supporting Information Figure 2

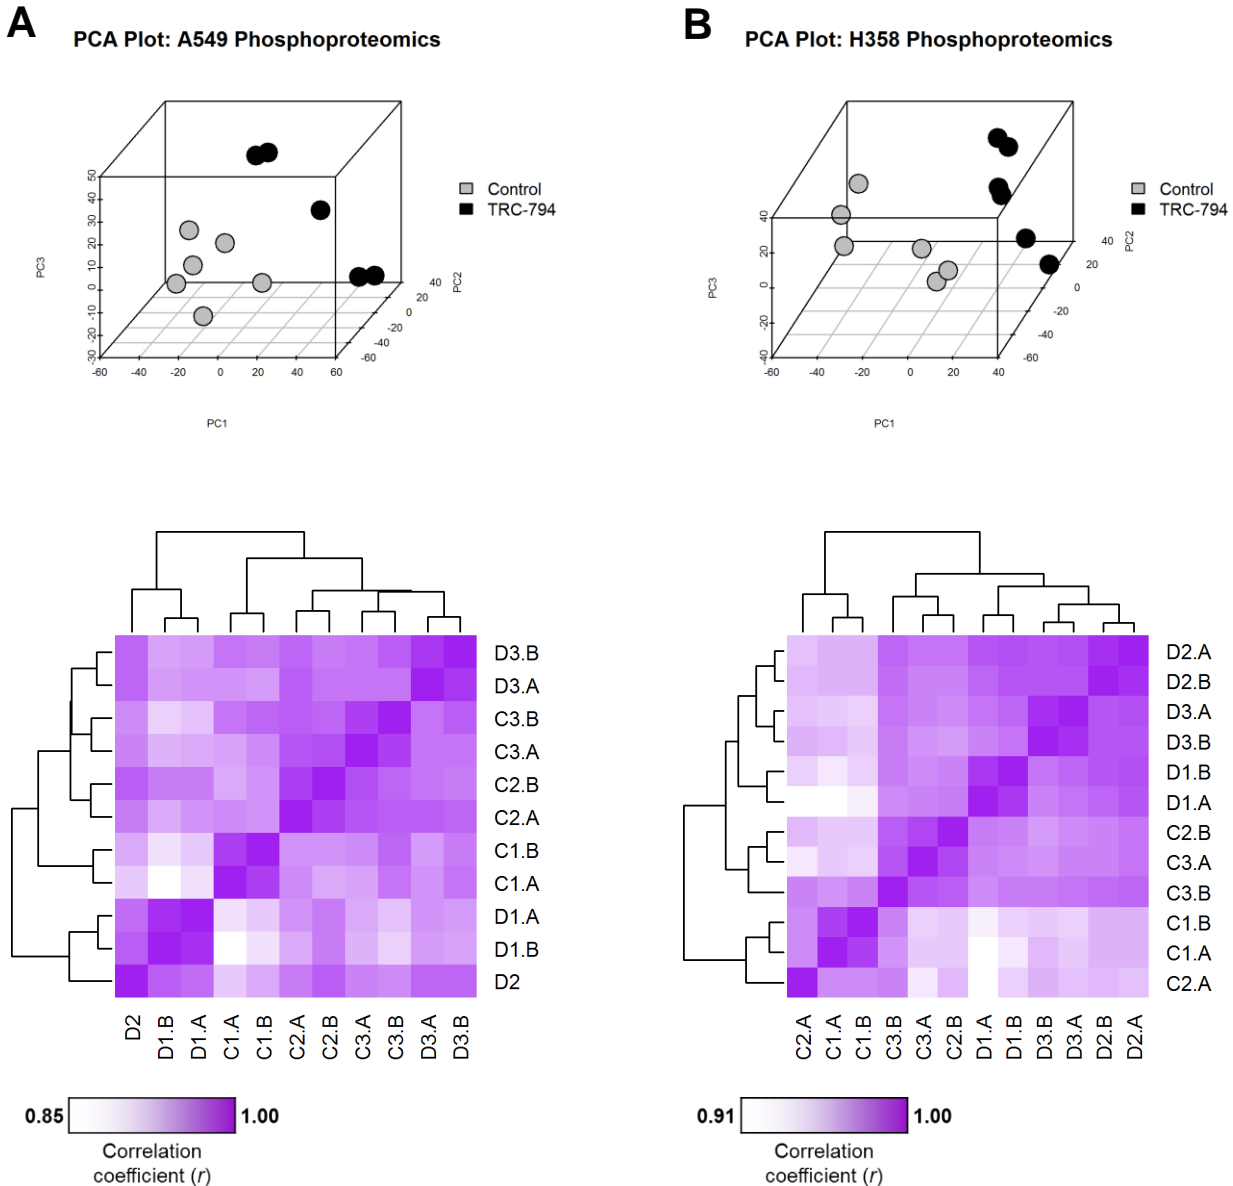

**Supporting Information Figure 2.** Principle component analysis and Spearman correlation analysis.

Both A549 and H358 phosphoproteomics peptide-level data were analyzed for principle component analysis (PCA), where the technical replicates are depicted individually. The same datasets were tested for correlation using Spearman's method. The resulting heat maps depict the correlation coefficients for all pair combinations within a cell line. Control and "Drug"-treated (TRC-794) samples are prefaced by "C" and "D", respectively. The two technical replicates of the same sample are distinguished by "A" and "B" appendices. (A) PCA plot (above) and correlation matrix heat map (below) for A549. Note that sample D2 is represented with only one of the technical replicates (indicated by "D2\_2" in the PRIDE repository), as the other had poor phospho-enrichment and was excluded. (B) The equivalent plots for H358.

### Supporting Information Figure 3

A549

|            | total | FC < 1 |          | FC = 1 |          | FC > 1 |          | all p < 0.05 |
|------------|-------|--------|----------|--------|----------|--------|----------|--------------|
|            |       | all    | p < 0.05 | all    | p < 0.05 | all    | p < 0.05 |              |
| P-Proteins | 1605  | 1010   | 229      | 1      | 0        | 594    | 79       | 308          |
| P-Peptides | 2999  | 1831   | 272      | 2      | 0        | 1166   | 91       | 363          |
| P-Sites    | 3396  | 2069   | 304      | 1      | 0        | 1326   | 96       | 400          |

H358

|            | total | FC < 1 |          | FC = 1 |          | FC > 1 |          | all p < 0.05 |
|------------|-------|--------|----------|--------|----------|--------|----------|--------------|
|            |       | all    | p < 0.05 | all    | p < 0.05 | all    | p < 0.05 |              |
| P-Proteins | 1617  | 755    | 115      | 0      | 0        | 862    | 168      | 283          |
| P-Peptides | 2895  | 1360   | 136      | 0      | 0        | 1535   | 201      | 337          |
| P-Sites    | 3135  | 1492   | 155      | 0      | 0        | 1643   | 217      | 372          |

Overlapping Phospho-Proteins/Peptides/Sites

|            | total | p < 0.05 |
|------------|-------|----------|
| P-Proteins | 1190  | 78       |
| P-Peptides | 2194  | 56       |
| P-Sites    | 1847  | 49       |

**Supporting Information Figure 3.** Summary statistics for the A549 and H358 phosphoproteomics datasets

### Supporting Information Figure 4

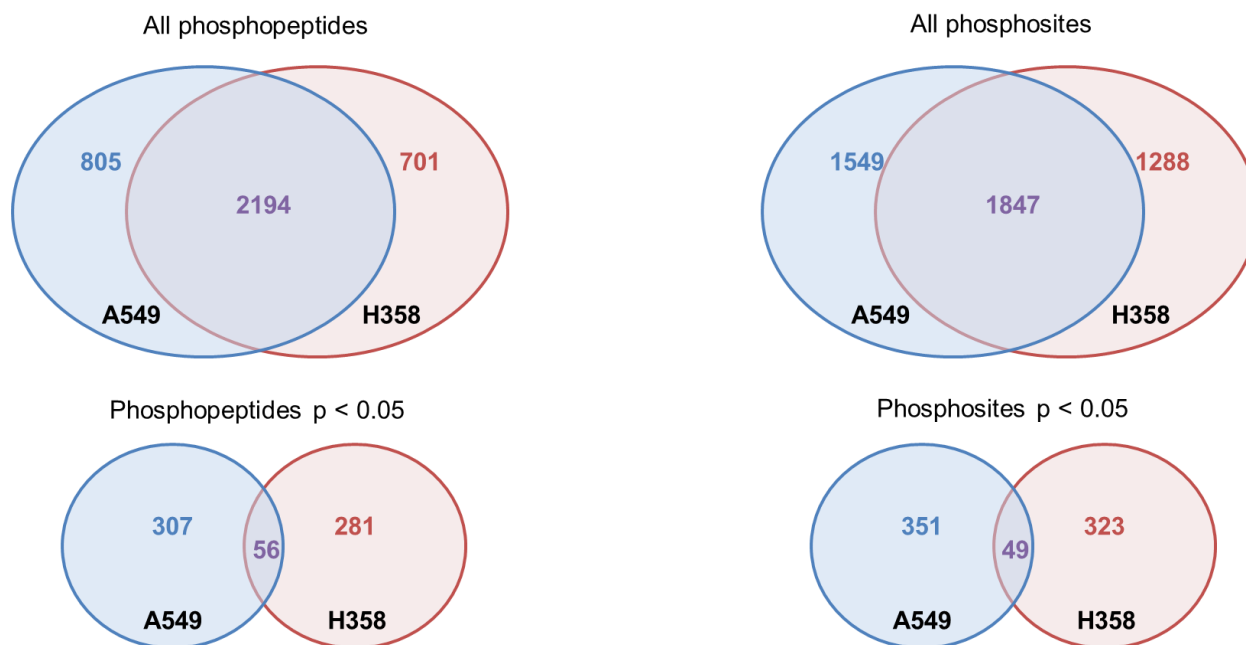

**Supporting Information Figure 4.** Venn diagrams representing overlaps at the phosphopeptide and phosphosite levels

**Supporting Information Figure 5**

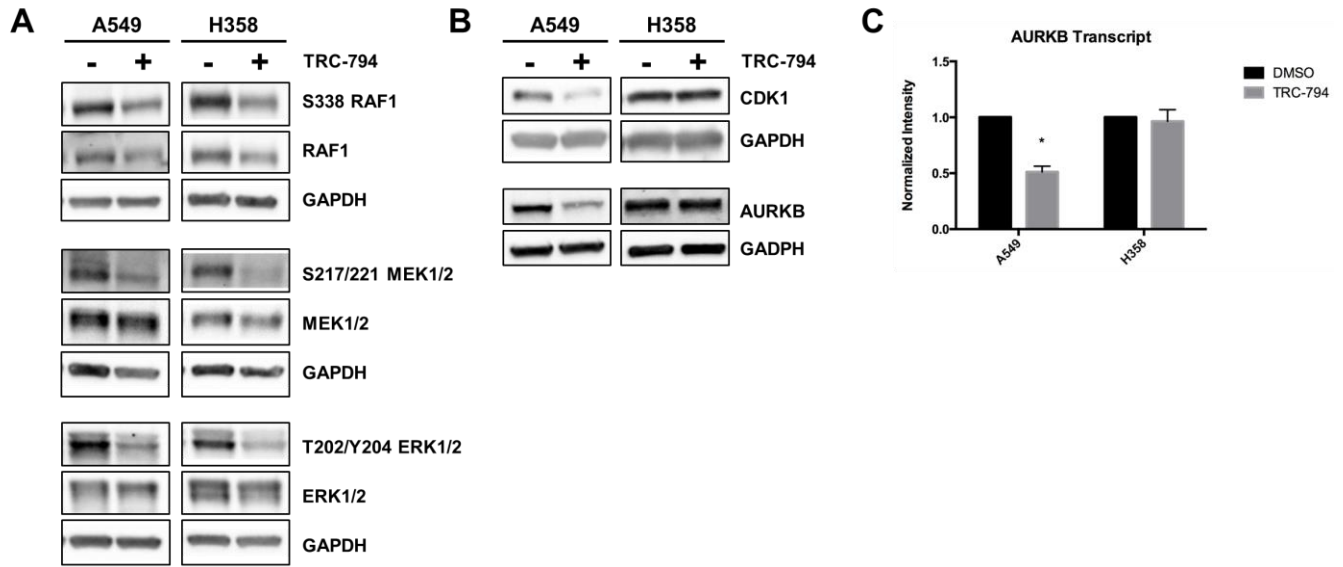

**Supporting Information Figure 5.** Validation of select KSEA results.

(A) Western blot against activating phosphosites for three MAPK pathway members: RAF1, MAP2K1/2 (MEK1/2 protein name), and MAPK3/1 (ERK1/2 protein names). Image shows the representative blots across 3 replicates. (B) Representative Western blot measuring relative levels of CDK1 and AURKB proteins. Experiments were done in at least triplicates. (C) Quantitative PCR of the mRNA transcript for AURKB; the means  $\pm$  SD across 3 independent replicates are reported (\* $p < 0.05$  by student's t-test). All experiments across the panels were performed at 12hrs with DMSO or 20uM TRC-794.

### Supporting Information Figure 6

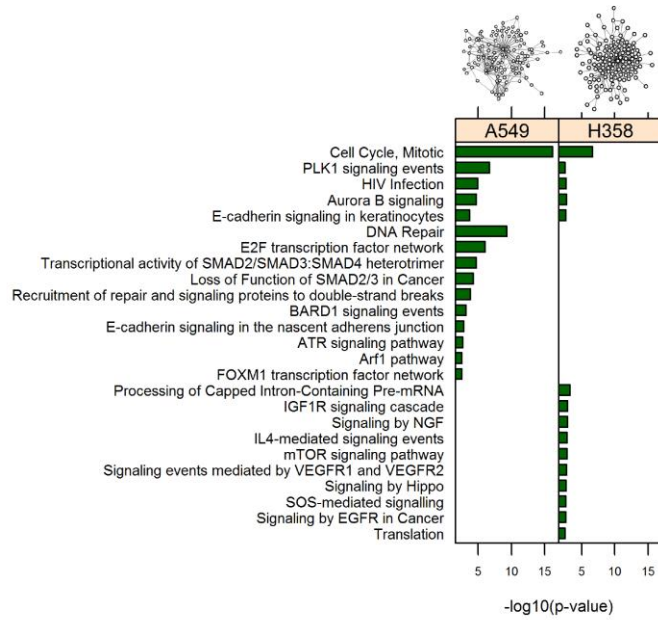

**Supporting Information Figure 6.** YourCrosstalker pathway enrichment also revealed stronger cell cycle prevalence in A549 and greater involvement of MAPK signaling in H358.

Bar plot highlighting the pathways enriched from the YourCrosstalker PPI network. All hits with visible bars met the  $p < 0.05$  statistical cutoff, Fisher's exact test. All shared pathways are listed, while only the top 10 unique pathways per cell line are included for brevity.

**Supporting Information Figure 7**

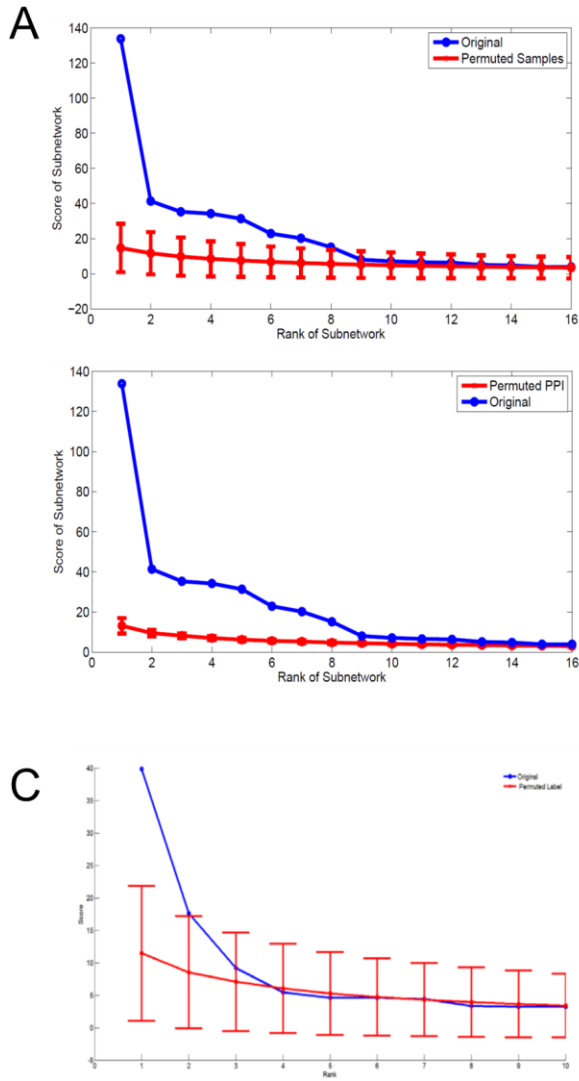

**B**

| RANK OF SUBNETWORK | Q-VALUE PERMUTED SAMPLE | Q-VALUE IN PERMUTED PPI |
|--------------------|-------------------------|-------------------------|
| 1                  | <0.01                   | <0.01                   |
| 2                  | 0.045                   | <0.01                   |
| 3                  | 0.05                    | <0.01                   |
| 4                  | 0.037                   | <0.01                   |
| 5                  | 0.034                   | <0.01                   |
| 6                  | 0.061                   | 0.001                   |
| 7                  | 0.061                   | 0.007                   |
| 8                  | 0.0837                  | 0.016                   |
| 9                  | 0.18                    | 0.132                   |
| 10                 | 0.179                   | 0.16                    |
| 11                 | 0.172                   | 0.173                   |

**Supporting Information Figure 7.** MoBaS network analysis identified a tightly-interconnected subnetwork involved in cell cycle progression.

(A) Graphical representation comparing the subnetwork scores of the actual dataset versus the permuted PPI for A549. Top graph used permutation of sample labels; bottom graph used permutation of the PPI edges. (B) A table format listing the statistical significance of the subnetworks identified by MoBaS in A549, as determined by the two permutation methods. (C) Graphical representation comparing the subnetwork scores of the actual dataset versus the permuted PPI for H358.



## Supporting Information Figure 8

### A. Top 10 MoBaS Clusters for A549

| Cluster | Protein Count | Score    | Genes                                                                                                                                    |
|---------|---------------|----------|------------------------------------------------------------------------------------------------------------------------------------------|
| 1       | 20            | 133.7616 | ATAD2, ANLN, TPX2, RRM2, CDCA8, KIF20A, CDCA2, FAM64A, NCAPH, MCM6, CENPF, KIF23, MKI67, CEP55, SMC4, CDC20, FANCI, UHRF1, NCAPG, INCENP |
| 2       | 11            | 41.39148 | RPS14, SMG7, RPS6, EIF2S2, EIF5B, EIF4B, EIF3H, EIF3B, RPL12, RPS11, RPS3A                                                               |
| 3       | 9             | 35.28807 | CENPC1, NDE1, CENPT, CLIP1, CLASP1, NUP85, DSN1, ERCC6L, CLASP2                                                                          |
| 4       | 12            | 34.2228  | PDCD4, YBX1, NFX1, GTF2F1, PABPN1, HNRNPA2B1, SF3B1, HNRNPA0, POLR2A, RBM5, HNRNPU, SRRM1                                                |
| 5       | 12            | 31.35978 | ATRX, CBX5, TFDP1, DNMT1, RB1, TFDP2, BRCA1, RBL1, CDKN1A, MYBL2, RBBP4, SIRT1                                                           |
| 6       | 10            | 22.86552 | NUP98, NUP88, TPR, NUP155, NUP50, DDX20, NUP214, NUP153, GEMIN5, NUP210                                                                  |
| 7       | 11            | 20.18979 | CDC25B, YWHAZ, YWHAE, BRAF, MAPK3, BAD, TSC2, RPS6KA1, RPS6KA3, PRKCD, RAF1                                                              |
| 8       | 10            | 15.13754 | PTPN2, EGFR, WASL, FYN, BCL3, JUN, CD44, CTNNA1, CTNND1, EPHA2                                                                           |
| 9       | 7             | 8.019285 | USP1, ATAD5, SMC3, ESCO1, WAPAL, PDS5A, PDS5B                                                                                            |
| 10      | 6             | 7.108402 | OSBPL1A, DYNC1I2, DYNC1LI2, DYNC1H1, PRKAR2B, CENPJ                                                                                      |

### B. Top 10 MoBaS Clusters for H358

| Cluster | Protein Count | Score    | Genes                                                                                                |
|---------|---------------|----------|------------------------------------------------------------------------------------------------------|
| 1       | 13            | 39.85851 | RPL27A, EIF5B, RPS6, EIF4G1, RPL12, RPS14, SEC61B, RPS3, EEF1B2, TRAM1, SMG7, CASC3, NCBP1           |
| 2       | 15            | 17.65059 | UHRF1, ANLN, NCAPG, PBK, KIF23, CDCA3, NDC80, TPX2, SHCBP1, CEP55, MKI67, KIF11, MELK, KIF15, MLF1IP |
| 3       | 8             | 9.207919 | YBX1, PDCD4, SRRM1, SF3B1, GTF2F1, HNRNPA2B1, HNRNPU, HNRNPA0                                        |
| 4       | 7             | 5.479246 | BAD, MAPK1, MAPK3, RPS6KA3, TSC2, MAPK14, MBP                                                        |
| 5       | 7             | 4.584579 | RB1CC1, RB1, RBL1, TFDP1, LIN9, RBBP4, LIN37                                                         |
| 6       | 6             | 4.584249 | CLASP1, NUDC, CLASP2, ERCC6L, DSN1, SGOL2                                                            |
| 7       | 4             | 4.421167 | WAPAL, PDS5B, SMC3, ESCO1                                                                            |
| 8       | 4             | 3.352406 | CGN, TJP3, TJP1, TJP2                                                                                |
| 9       | 4             | 3.223818 | NUP214, AAAS, SNUPN, GEMIN5                                                                          |
| 10      | 4             | 3.205428 | CTNND1, PSEN1, CLIP1, APBA1                                                                          |

Supporting Information Figure 8. Top 10 modules identified by MoBaS

## Supporting Information Figure 9A

### Top 10 cluster results using the MCODE method (A549)

#### Network Scoring Parameters:

Include Loops: false Degree Cutoff: 2

#### Cluster Finding Parameters:

Node Score Cutoff: 0.2 Haircut: true Fluff: false K-Core: 2 Max. Depth from Seed: 100

| Cluster  | Score         | Nodes     | Edges      | Node IDs                                                                                                                                                                                                                                                                                                                                                                                                                                       |
|----------|---------------|-----------|------------|------------------------------------------------------------------------------------------------------------------------------------------------------------------------------------------------------------------------------------------------------------------------------------------------------------------------------------------------------------------------------------------------------------------------------------------------|
| 1        | 19.368        | 39        | 368        | CKAP5, NDE1, CENPF, CLASP1, SF3A2, CDC20, INCENP, DSN1, YBX1, CLIP1, ERCC6L, HNRNPA2B1, NUDC, RBM5, CENPC1, SF3B1, TAOK1, SF3B2, CENPT, HNRNPA0, CLASP2, CD2BP2, AURKB, NUP85, HNRNPU, PABPN1, SF3A1, NXF1, THOC4, SRRM1, ZWINT, PRPF8, EFTUD2, POLR2A, GTF2F1, CDCA8, NCBP1, NCBP2, POLR2H                                                                                                                                                    |
| <b>2</b> | <b>15.895</b> | <b>20</b> | <b>151</b> | <b>KIF20A, KIF23, CEP55, OIP5, PBK, NCAPG, RRM2, SMC4, MCM6, CDCA2, CDC6, TPX2, CDC2, ANLN, CCNB1, NCAPH, MKI67, FANCI, MCM4, KIAA0101</b>                                                                                                                                                                                                                                                                                                     |
| 3        | 12.778        | 37        | 230        | PRKAR2B, RPL12, RPLP1, RPLP2, RPS14, RPS3, RPS13, RPS20, YWHAE, CETN2, FGFR1OP, DDX20, GEMIN5, NXF1, TPR, NUP214, NUP50, NUP153, NUP210, NUP155, PPP2R1A, NUP88, AAAS, UPF1, SMG7, RPS6, CASC3, EIF3B, EIF4G1, EIF4B, EIF2S2, EIF5B, EIF3H, EIF3G, CENPJ, DYNC1I2, DYNC1H1                                                                                                                                                                     |
| 4        | 9.526         | 39        | 181        | GRB2, FYN, PRKDC, CDH1, CTNNB1, RAC1, EFNA1, CBL, EXOC4, RAB10, EP300, RAB8A, CDC26, ANAPC4, SMAD2, SH3KBP1, ANAPC2, NEK2, JUN, MYO5A, PTK2, STX4, SNAP23, SP1, MCM3, SMARCA4, FZR1, EGF, CRK, MCM2, EGFR, PDGFB, RALA, PIP5K1C, CDC42, SRC, VAMP2, NCK1, PIK3R1                                                                                                                                                                               |
| 5        | 7.235         | 35        | 123        | CDKN1A, IGF2, NCOA3, NCOR2, PSMD1, AEBP2, PHC3, PSMD11, EED, RNF2, SUZ12, CBX8, PHC2, HDAC2, SCML2, RBBP4, SSRP1, MED13L, HDAC3, SEC61B, CDK9, RPN2, CCNT2, TCEB2, CCNH, PCNA, MED13, MED12, ELL, MED24, MYC, MED14, CTNND1, CTNNA1, TGS1                                                                                                                                                                                                      |
| 6        | 6.065         | 63        | 188        | SPAG9, LAS1L, SENP3, TAF7, MEF2A, MGA, SMAD3, CD44, MLL, PCAF, GSK3B, TLE1, CHD3, MLH1, GATAD2B, GATAD2A, SNW1, ZNF217, APC, ESR1, TLE4, RUVBL1, CTBP1, NOTCH1, PTPN1, GTF3C4, GTF3C1, POLR3E, TFDP1, GTF3C2, GTF3C3, HSPA4, STAT3, LZTS1, BNIP2, TP53, CHD4, HDAC1, SMAD4, IRS2, MSH2, GJA1, GSK3A, DVL2, PPP4R2, PPP1R9B, TOX4, PPP1R12A, MSH6, PPP1CA, CREBBP, MED1, PPP2CB, MAPK1, CDK2, PRKCZ, THRAP3, RBM14, AR, LRP6, CTTN, CDC5L, TJP1 |
| 7        | 6             | 6         | 15         | BYSL, BMS1, BXDC2, UTP15, RIOK2, PNO1                                                                                                                                                                                                                                                                                                                                                                                                          |
| 8        | 5             | 5         | 10         | NR5A1, NRBP1, RORC, NR2F6, ESRRA                                                                                                                                                                                                                                                                                                                                                                                                               |
| 9        | 5             | 5         | 10         | EDC3, DCP1A, EDC4, DCP1B, LSM3                                                                                                                                                                                                                                                                                                                                                                                                                 |
| 10       | 4.5           | 5         | 9          | TIAM1, TRIP10, ARHGAP1, ARHGEF17, RHOQ                                                                                                                                                                                                                                                                                                                                                                                                         |

## Supporting Information Figure 9B

### Cluster results using the MCODE method (H358)

#### Network Scoring Parameters:

Include Loops: false Degree Cutoff: 2

#### Cluster Finding Parameters:

Node Score Cutoff: 0.2 Haircut: true Fluff: false K-Core: 2 Max. Depth from Seed: 100

| Cluster | Score  | Nodes | Edges | Node IDs                                                                                                                                                                                                                                                                                                                                                                                                                          |
|---------|--------|-------|-------|-----------------------------------------------------------------------------------------------------------------------------------------------------------------------------------------------------------------------------------------------------------------------------------------------------------------------------------------------------------------------------------------------------------------------------------|
| 1       | 20.316 | 58    | 579   | NUP85, AURKB, CDC2, XPO1, ANLN, MLF1IP, SHCBP1, GINS2, CDCA3, TPX2, MKI67, KIAA0101, KIF15, CKAP5, KIF20A, CEP55, RACGAP1, MELK, MAD2L1, CCNB2, KIF23, GTF2F1, PBK, YBX1, CLASP1, HNRNPA2B1, INCENP, NCAPG, SF3B1, DSN1, DLG7, KIF11, HNRNPA0, CLIP1, CD2BP2, SGOL2, HNRNPU, ERCC6L, CDC6, SNRPA1, NUDC, ZWINT, SF3A1, CENPC1, NEK2, THOC4, TAOK1, SRRM1, CLASP2, U2AF2, SF3A2, SNRP70, PRPF8, POLR2A, NCBP1, RBM8A, POLR2E, CLP1 |
| 2       | 11.29  | 32    | 175   | NUP153, NUP210, NUP155, NUP88, AAAS, EIF4E, EIF4A3, UPF1, FGFR1OP, CEP152, CEP250, DYNC1I2, DYNC1H1, RPS6, PRKAR2B, RPL27A, RPS3, PPP2R1A, SNUPN, UPF2, SMG7, AKAP9, CASC3, CETN2, EIF4G1, RPL12, RPS14, NXF1, TPR, NUP214, NUP50, NUP62                                                                                                                                                                                          |
| 3       | 8      | 12    | 44    | PTPN1, PIK3R1, SH3KBP1, FYN, CTNNB1, EGFR, EFNA1, JUP, CDC42, EGF, MET, STAT3                                                                                                                                                                                                                                                                                                                                                     |
| 4       | 8      | 8     | 28    | BXDC2, WDR3, TSR1, DKC1, PWP2, PNO1, KRR1, BYSL                                                                                                                                                                                                                                                                                                                                                                                   |
| 5       | 6.667  | 10    | 30    | MCM6, ATAD2, CENPF, CDCA8, SMC4, CDCA2, FANCI, MCM4, NDC80, KIF2C                                                                                                                                                                                                                                                                                                                                                                 |
| 6       | 6.429  | 57    | 180   | BNIP2, SPAG9, MEF2A, ATRIP, IRF6, IRF2, SP100, ABL1, HLA-DRB1, IRS1, GBP1, CD44, CTTN, SIRT1, SMAD3, JUN, CTNND1, EPHB2, CTNNA1, EPS15L1, EPHA2, NCK1, EPS15, KIT, VAV2, SH3GL2, SRC, CHD3, GATAD2B, GATAD2A, CBL, CHD4, NR2F6, ZNF217, NRBP1, IGF1R, MSH6, MSH2, SMAD2, IGF2, ERBB2, SMAD4, PPP4R2, MBD2, PPP1R9B, TOX4, PPP1R12A, PPP1CA, HRAS, PPP2CB, MAPK1, SMARCA4, HNF4G, NR5A1, ESRRA, CDK2, SP1                          |
| 7       | 6      | 6     | 15    | AEBP2, RNF2, SUZ12, CBX8, PHC2, SCML2                                                                                                                                                                                                                                                                                                                                                                                             |
| 8       | 6      | 6     | 15    | GTF3C2, GTF3C3, LZTS1, GTF3C4, GTF3C1, POLR3E                                                                                                                                                                                                                                                                                                                                                                                     |
| 9       | 6      | 6     | 15    | LMNB1, TERF2, ACD, SMC3, SYNE2, TERF2IP                                                                                                                                                                                                                                                                                                                                                                                           |
| 10      | 5.9    | 21    | 59    | CHD9, TGS1, SSR3, TRAM1, MED13, SEC61B, WHSC2, MED13L, RPN2, CDK9, TP53, ELL, NCOR2, NCOA3, SSRP1, MED24, MED14, LPL, UBC, TCEB2, MAPK3                                                                                                                                                                                                                                                                                           |

### Supporting Information Figure 9. MCODE cluster results

MCODE was applied onto the same networks as for MoBaS. Top 10 hits are listed for (A) A549 and (B) H358. The highlighted rows represent the clusters with high overlap to their MoBaS counterparts.
