# Supplementary material
Source: PubMed Central journal article supplement (PMC7656239)
Supplement: NIHMS1638547-supplement-Table_S1.pdf [file NIHMS1638547-supplement-Table_S1.pdf]

A549 Cell Line, Treated with DMSO vs. 20uM TRC-794 for 12hrs  
 Mascot Search Results, as reported through Rosetta Elucidator

| (M+H)  | Ions Found | Protein Code | Peptide Sequence    | Modified Peptide Sequence            | Charge | F-Score | Expectation Value | Mass Diff | # Missed Cleavages | Ion Score | Identity Threshold | Protein Score | # Queries Matched | Length in Residues | Mass Error (ppm) |
|--------|------------|--------------|---------------------|--------------------------------------|--------|---------|-------------------|-----------|--------------------|-----------|--------------------|---------------|-------------------|--------------------|------------------|
| 2298.1 | 15         | A0FGR8       | K.EPTTPIASDLSPIAT   | EPTTPI[166.9984]ASDLS[166.9984]      | 3      | 0.211   | 0.028             | -0.002    | 0                  | 23.47     | 21                 | 35            | 5                 | 921                | -0.94            |
| 3213.3 | 21         | A0FGR8       | K.SHMSSGSPGGSS      | SHMSS[166.9984]GSS[166.9984]         | 3      | 0.394   | 0.023             | -0.01     | 1                  | 24.29     | 20                 | 30            | 4                 | 921                | -3.04            |
| 2298.1 | 17         | A0FGR8       | K.EPTTPIASDLSPIAT   | EPTTPIASDLS[166.9984]PIATQ[166.9984] | 2      | 0.03    | 0.043             | -0.002    | 0                  | 21.65     | 21                 | 30            | 4                 | 921                | -0.94            |
| 1039.5 | 12         | A1L390       | R.EPTTPIASDLSPIAT   | EPTTPIASDLS[166.9984]PIATQ[166.9984] | 2      | -0.818  | 0.035             | -0.005    | 0                  | 21.08     | 19                 | 42            | 5                 | 272                | -2.18            |
| 1302.6 | 7          | A1L390       | R.ASSPSLIEN         | ASS[166.9984]SLIEN                   | 2      | -0.589  | 0.02              | -0.002    | 0                  | 25.5      | 21                 | 26            | 2                 | 272                | -1.96            |
| 2249   | 9          | A1L390       | R.SSSVLSLEGSEK      | SSSVLS[166.9984]LEGSEK               | 2      | 0.14    | 0.003             | -0.003    | 0                  | 32.76     | 21                 | 62            | 7                 | 1219               | -2.11            |
| 1054.5 | 11         | A1L390       | R.DGKSPVTRCLQEEA    | DGKSPVTR[166.9984]CLQEEA             | 3      | 1.182   | 0.003             | -0.004    | 1                  | 33.22     | 21                 | 62            | 7                 | 1219               | -1.93            |
| 1815.8 | 11         | A1L390       | R.SHSVPENVMVEPLLS   | SHSVPENVMVEPLLS[166.9984]            | 2      | -0.275  | 0.01              | -0.002    | 0                  | 27.61     | 20                 | 62            | 7                 | 1219               | -1.92            |
| 2249   | 11         | A1L390       | R.DGKSPVTRCLQEEA    | DGKSPVTR[166.9984]CLQEEA             | 3      | 0.14    | 0.035             | -0.005    | 0                  | 22.73     | 21                 | 63            | 5                 | 1219               | -2.92            |
| 1382.5 | 5          | A1L390       | R.SSSVLSLEGSEK      | SSSVLS[166.9984]LEGSEK               | 2      | 0.719   | 0.01              | -0.004    | 1                  | 28.54     | 21                 | 42            | 6                 | 1219               | -1.93            |
| 1650.8 | 7          | A2A2Y4       | K.EENISAPLISSEPK    | EENISAPLISSE[166.9984]PK             | 2      | -0.994  | 0.049             | -0.002    | 0                  | 19.39     | 19                 | 42            | 6                 | 597                | -1.78            |
| 1546.5 | 7          | A2A2Y4       | R.EYEDPSEEEK        | EYEDP[166.9984]SEEEK                 | 2      | 0.285   | 0.011             | -0.004    | 0                  | 39.82     | 21                 | 41            | 2                 | 597                | -1.8             |
| 2254.8 | 12         | A2RNP1       | R.AGEEDEGEEDSDSC    | AGEEDEGEEDS[166.9984]SDSY            | 2      | -0.015  | 0.005             | -0.005    | 0                  | 25.48     | 18                 | 68            | 7                 | 2371               | -2.54            |
| 2334.8 | 17         | A2RNP1       | R.AGEEDEGEEDSDSC    | AGEEDEGEEDS[166.9984]SDSY            | 2      | 0.805   | 8.30E-04          | -0.005    | 0                  | 27.16     | 17                 | 68            | 7                 | 2371               | -2.11            |
| 2254.8 | 12         | A2RNP1       | R.AGEEDEGEEDSDSC    | AGEEDEGEEDS[166.9984]SDSY            | 2      | 0.398   | 0.002             | -0.005    | 0                  | 33.36     | 15                 | 68            | 7                 | 2371               | -2.13            |
| 2334.8 | 16         | A2RNP1       | R.AGEEDEGEEDSDSC    | AGEEDEGEEDS[166.9984]SDSY            | 2      | 1.363   | 2.30E-04          | -0.005    | 0                  | 31.2      | 17                 | 68            | 7                 | 2371               | -2.11            |
| 2441   | 13         | AGWF1        | R.TLEEVMAAEEDEG     | TLEEVMAAEEDEGDRP[166.9984]           | 3      | 0.614   | 0.012             | -0.003    | 1                  | 38.94     | 15                 | 68            | 7                 | 2371               | -2.13            |
| 1692.8 | 16         | C9I198       | R.LQATLEAEPGAAG     | LQATLEAEPGAAGAGAS[166.9984]          | 2      | 0.116   | 0.004             | -0.002    | 0                  | 26.5      | 20                 | 26            | 1                 | 404                | -1.33            |
| 1324.6 | 8          | O00161       | K.VWVSPVTEEGK       | VWV[166.9984]PVTEEGK                 | 2      | 1.047   | 5.20E-04          | -0.002    | 0                  | 39.78     | 19                 | 32            | 1                 | 176                | -1.3             |
| 1887.8 | 9          | O00161       | K.TWVGGDGENSPCN     | TWVGGDGENSPCN[166.9984]              | 2      | 0.848   | 7.00E-04          | -0.009    | 0                  | 40.7      | 22                 | 45            | 4                 | 329                | -1.55            |
| 2671.1 | 14         | O00193       | K.RASAPDDDLGSSNW    | RSAPDDDLGSS[166.9984]NWI             | 3      | 2.572   | 4.70E-05          | -0.004    | 1                  | 51.36     | 21                 | 51            | 1                 | 183                | -1.66            |
| 2671.1 | 12         | O00193       | K.RASAPDDDLGSSNW    | RSAPDDDLGSS[166.9984]NWI             | 3      | 1.982   | 6.90E-06          | -0.004    | 1                  | 59.72     | 21                 | 95            | 4                 | 183                | -1.66            |
| 2671.1 | 9          | O00193       | K.RASAPDDDLGSSNW    | RSAPDDDLGSS[166.9984]NWI             | 3      | 1.465   | 1.60E-04          | -0.004    | 1                  | 45.94     | 21                 | 88            | 4                 | 183                | -1.66            |
| 2671.1 | 12         | O00193       | K.RASAPDDDLGSSNW    | RSAPDDDLGSS[166.9984]NWI             | 3      | 2.831   | 2.60E-05          | -0.004    | 1                  | 53.94     | 21                 | 88            | 4                 | 183                | -1.66            |
| 2515   | 18         | O00193       | K.RASAPDDDLGSSNW    | RSAPDDDLGSS[166.9984]NWI             | 3      | 0.845   | 0.007             | -0.005    | 0                  | 28.8      | 20                 | 71            | 4                 | 183                | -2.04            |
| 1340.5 | 10         | O00203       | K.NFYVSDDDQK        | NFYVSD[166.9984]DDQK                 | 2      | -0.461  | 0.015             | -0.002    | 0                  | 20.7      | 15                 | 21            | 3                 | 1094               | -1.88            |
| 2484.1 | 22         | O00264       | K.IVNRDQPAASGDSI    | IVNRDQPAASGDS[166.9984]DI            | 3      | 2.572   | 9.00E-05          | -0.005    | 1                  | 48.61     | 21                 | 135           | 6                 | 195                | -2.23            |
| 2375.9 | 11         | O00264       | K.EEPEPTVYDDEEP     | EEPEPTVYDDEEP[166.9984]DEEPEK        | 2      | 0.87    | 7.00E-04          | -0.005    | 1                  | 38.06     | 19                 | 135           | 6                 | 195                | -2.03            |
| 1817.7 | 16         | O00264       | K.EEPEPTVYDDEEP     | EEPEPTVYDDEEP[166.9984]DEEPEK        | 2      | 0.43    | 0.002             | -0.004    | 0                  | 33.66     | 19                 | 135           | 6                 | 195                | -2.44            |
| 2115.9 | 11         | O00264       | R.GDOPAAASGDSDD     | GDOPAAASGDS[166.9984]DDEI            | 3      | 0.606   | 0.012             | -0.004    | 0                  | 26.46     | 20                 | 135           | 6                 | 195                | -2.06            |
| 2115.9 | 12         | O00264       | R.GDOPAAASGDSDD     | GDOPAAASGDS[166.9984]DDEI            | 3      | 0.173   | 0.033             | -0.004    | 0                  | 22.06     | 20                 | 100           | 7                 | 195                | -2.06            |
| 3038.5 | 6          | O00291       | R.AALLSEHSPVIVP     | AALLSEHSPVIVPAAEASPD[166.9984]       | 3      | 0.3     | 0.028             | -0.007    | 0                  | 22.33     | 19                 | 107           | 2                 | 1037               | -2.38            |
| 1051.5 | 6          | O00443       | K.VSNLQVSK          | VSNLQV[166.9984]SK                   | 2      | 0.989   | 4.80E-04          | -0.002    | 0                  | 40.2      | 20                 | 40            | 7                 | 1686               | -2.13            |
| 1658.7 | 19         | O00499       | K.SPPVDPGSAATPE     | SPVDPGSAATPE[166.9984]PAATPE         | 2      | 1.467   | 8.00E-04          | -0.003    | 0                  | 46        | 21                 | 59            | 3                 | 593                | -1.89            |
| 2116.9 | 19         | O00505       | R.NVNPQESLESDVC     | NVNPQESLEDS[166.9984]DVDA            | 2      | 2.732   | 8.10E-07          | -0.005    | 0                  | 68.46     | 20                 | 82            | 3                 | 521                | -2.56            |
| 2279   | 18         | O00505       | R.NVNPQESLESDVC     | NVNPQESLEDS[166.9984]DVDA            | 2      | 0.086   | 0.039             | -0.004    | 1                  | 21.21     | 20                 | 59            | 4                 | 521                | -1.99            |
| 2279   | 13         | O00519       | R.KLSGEDIQLPTTV     | KLSDGDIQLPTTV[166.9984]DPTTV         | 2      | 1.978   | 4.90E-08          | -0.004    | 1                  | 80.86     | 20                 | 122           | 3                 | 213                | -2.03            |
| 2678.1 | 19         | O00562       | R.SAASNTGTDPGEA     | SAASNTGTDPGEPAPGDA[166.9984]         | 3      | 0.22    | 0.035             | -0.005    | 0                  | 21.55     | 19                 | 19            | 2                 | 1244               | -1.91            |
| 2075.8 | 15         | O00566       | K.SPVFSDSDLDLDF     | SPVFSDEDS[166.9984]LDF               | 2      | -0.886  | 0.038             | -0.003    | 0                  | 19.45     | 18                 | 19            | 2                 | 681                | -1.41            |
| 2075.8 | 18         | O00566       | K.SPVFSDSDLDLDF     | SPVFSDEDS[166.9984]LDF               | 2      | -0.929  | 0.043             | -0.003    | 0                  | 18.93     | 18                 | 19            | 1                 | 681                | -1.41            |
| 1995.8 | 16         | O00566       | K.SPVFSDSDLDLDF     | SPVFSDEDS[166.9984]LDF               | 2      | 0.885   | 7.30E-04          | 3.00E-04  | 0                  | 39.21     | 20                 | 39            | 2                 | 681                | 0.15             |
| 2183.9 | 11         | O00567       | K.EELMSSDLEETAGS    | EELMSS[166.9984]DLEETAGS             | 3      | 1.777   | 9.30E-05          | -0.005    | 0                  | 47.13     | 19                 | 210           | 12                | 594                | -2.3             |
| 2553.1 | 9          | O00567       | K.SFSKEELMSSDLEET   | SFSKEELMSS[166.9984]DLEETA           | 3      | 1.41    | 3.10E-04          | -0.005    | 1                  | 43.08     | 21                 | 210           | 12                | 594                | -1.81            |
| 1856.8 | 17         | O00567       | K.FSKEEPPVSGPEEAVGK | FSKEEPPVSGPEEAVG[166.9984]           | 2      | 1.09    | 0.004             | -0.004    | 1                  | 32.3      | 21                 | 210           | 12                | 594                | -2.29            |
| 1574.6 | 17         | O00567       | K.EEPPVSGPEEAVGK    | EEPPVSGPEEAVG[166.9984]              | 2      | -0.432  | 0.013             | -0.005    | 0                  | 25.04     | 19                 | 210           | 12                | 594                | -3.03            |
| 1936.8 | 17         | O00567       | K.FSKEEPPVSGPEEAVGK | FSKEEPPVSGPEEAVG[166.9984]           | 2      | -0.156  | 0.007             | -0.005    | 1                  | 29.8      | 21                 | 210           | 12                | 594                | -2.41            |
| 1494.6 | 8          | O00567       | K.EEPPVSGPEEAVGK    | EEPPVSGPEEAVG[166.9984]              | 2      | 0.341   | 0.002             | -0.002    | 0                  | 33.77     | 20                 | 210           | 12                | 594                | -1.5             |
| 2103.9 | 18         | O00567       | K.EELMSSDLEETAGS    | EELMSS[166.9984]DLEETAGS             | 3      | 0.634   | 0.011             | -0.003    | 0                  | 27.69     | 21                 | 169           | 10                | 594                | -1.57            |
| 2103.9 | 19         | O00567       | K.EELMSSDLEETAGS    | EELMSS[166.9984]DLEETAGS             | 3      | 0.539   | 0.014             | -0.003    | 0                  | 26.72     | 21                 | 169           | 10                | 594                | -1.57            |
| 2553.1 | 7          | O00567       | K.SFSKEELMSSDLEET   | SFSKEELMSS[166.9984]DLEETA           | 3      | 1.472   | 5.30E-04          | -0.005    | 1                  | 40.79     | 21                 | 169           | 10                | 594                | -1.81            |
| 2553.1 | 13         | O00567       | K.SFSKEELMSSDLEET   | SFSKEELMSS[166.9984]DLEETA           | 3      | 2.085   | 1.10E-06          | -0.005    | 1                  | 67.73     | 21                 | 273           | 12                | 594                | -2.13            |
| 3055.3 | 10         | O00567       | R.LAALALASSENSSST   | LAALALASSENSSS[166.9984]T            | 3      | 1.078   | 0.005             | -0.008    | 1                  | 31.13     | 20                 | 253           | 14                | 594                | -2.68            |
| 1856.8 | 16         | O00567       | K.FSKEEPPVSGPEEAVGK | FSKEEPPVSGPEEAVG[166.9984]           | 2      | 1.249   | 0.003             | -0.004    | 1                  | 33.84     | 21                 | 253           | 14                | 594                | -2.29            |
| 1494.6 | 15         | O00567       | K.EEPPVSGPEEAVGK    | EEPPVSGPEEAVG[166.9984]              | 2      | 0.45    | 0.002             | -0.002    | 0                  | 34.86     | 20                 | 229           | 12                | 594                | -1.5             |
| 2228.8 | 13         | O00629       | R.NVPHEDICEDSDID    | NVPHEDIC[160.0307]EDS[166.9984]      | 2      | -0.983  | 0.049             | -0.002    | 0                  | 20.48     | 20                 | 20            | 1                 | 521                | -1.88            |
| 1676.8 | 14         | O14545       | R.LDSQPQETSPELPR    | LDSQPQETS[166.9984]PELPR             | 2      | -0.531  | 0.016             | -0.002    | 0                  | 27.05     | 22                 | 37            | 2                 | 582                | -1.13            |
| 1355.6 | 16         | O14578       | R.SESVSLGSDSPAK     | SESVSLGSDS[166.9984]PAK              | 2      | 0.394   | 0.002             | -0.004    | 0                  | 35.16     | 21                 | 25            | 2                 | 2027               | -3.1             |
| 1780.7 | 7          | O14639       | R.TLSPTPSAEGYQDV    | TLS[166.9984]PTPSAEGYQDV             | 2      | 0.503   | 0.002             | -0.004    | 0                  | 34.39     | 19                 | 101           | 5                 | 778                | -2.1             |
| 1700.8 | 8          | O14639       | R.TLSPTPSAEGYQDV    | TLS[166.9984]PTPSAEGYQDV             | 2      | 1.85    | 6.90E-05          | -0.004    | 0                  | 49.86     | 21                 | 101           | 5                 | 778                | -2.07            |
| 1562.7 | 8          | O14639       | R.RSQGSINSPIVYSR    | RSQGSINSPIVYSR[166.9984]             | 2      | 2.262   | 2.70E-05          | -0.004    | 0                  | 53.98     | 21                 | 101           | 5                 | 778                | -2.71            |
| 2635.1 | 19         | O14639       | R.RSQGSINSPIVYSR    | RSQGSINSPIVYSR[166.9984]             | 2      | 0.55    | 0.013             | -0.007    | 1                  | 25.86     | 20                 | 132           | 7                 | 778                | -2.45            |
| 1780.7 | 11         | O14639       | R.TLSPTPSAEGYQDV    | TLS[166.9984]PTPSAEGYQDV             | 2      | -0.172  | 0.008             | -0.004    | 0                  | 27.61     | 19                 | 122           | 6                 | 778                | -2.1             |
| 2635.1 | 15         | O14639       | R.RSQGSINSPIVYSR    | RSQGSINSPIVYSR[166.9984]             | 2      | 0.557   | 0.013             | -0.007    | 1                  | 25.9      | 20                 | 111           | 6                 | 778                | -2.45            |
| 2635.1 | 24         | O14639       | R.RSQGSINSPIVYSR    | RSQGSINSPIVYSR[166.9984]             | 2      | 0.528   | 0.014             | -0.007    | 1                  | 25.63     | 20                 | 122           | 6                 | 778                | -2.45            |
| 1562.7 | 9          | O14639       | R.RSQGSINSPIVYSR    | RSQGSINSPIVYSR[166.9984]             | 2      | -0.456  | 0.014             | -0.004    | 0                  | 26.73     | 21                 | 115           | 8                 | 778                | -2.71            |
| 1961.8 | 18         | O14639       | R.DCLCLCAQPMSS      | DC[160.0307]C[160.0307]QLC[166.9984] | 3      | -0.137  | 0.007             | -0.004    | 0                  | 26.85     | 18                 | 105           | 5                 | 778                | -2.3             |
| 1614.7 | 5          | O14639       | R.RSGREEDDEELLR     | RS[166.9984]GREEDDEELLR              | 3      | 0.052   | 0.042             | -0.004    | 1                  | 20.88     | 20                 | 132           | 7                 | 778                | -2.14            |
| 2635.1 | 18         | O14639       | R.RSQGSINSPIVYSR    | RSQGSINSPIVYSR[166.9984]             | 2      | 1.635   | 0.001             | -0.007    | 1                  | 36.7      | 20                 | 115           | 8                 | 778                | -2.45            |
| 1282.6 | 6          |              |                     |                                      |        |         |                   |           |                    |           |                    |               |                   |                    |                  |

|             |    |             |                                                      |        |          |        |   |       |    |     |    |      |       |
|-------------|----|-------------|------------------------------------------------------|--------|----------|--------|---|-------|----|-----|----|------|-------|
| 2438.9      | 10 | O15164      | R.NESEDNKFSDSDI NESEDNKFSDS[166.9984]DDI 2           | 2.113  | 3.70E-05 | -0.002 | 1 | 51.35 | 20 | 51  | 3  | 1050 | -0.74 |
| 2159.9      | 20 | O15173      | R.LKPGPEEPTDEE LKPGPEEPTDEE[181.014]DEEDT 2          | 1.41   | 3.30E-04 | -0.002 | 1 | 43.75 | 21 | 115 | 6  | 223  | -0.81 |
| 2239.9      | 12 | O15173      | R.LKPGPEEPTDEE LKPGPEEPTDEE[166.9984]EY[181.014] 3   | 0.282  | 0.025    | -0.004 | 1 | 23.22 | 20 | 115 | 6  | 223  | -1.86 |
| 1805.7      | 6  | O15173      | R.PGPEEPTDEEPT DEEPT DEEPT[181.014]DEEDT 2           | 0.79   | 8.40E-04 | -0.004 | 0 | 36.26 | 18 | 115 | 6  | 223  | -2.31 |
| 2159.9      | 15 | O15173      | R.LKPGPEEPTDEE LKPGPEEPTDEE[166.9984]EYDEEDT 2       | 1.985  | 2.60E-05 | -0.005 | 1 | 54.62 | 21 | 99  | 6  | 223  | -2.29 |
| 1805.7      | 9  | O15173      | R.PGPEEPTDEEPT DEEPT DEEPT[166.9984]EYDEEDT 2        | 0.078  | 0.004    | -0.004 | 0 | 29.13 | 18 | 99  | 6  | 223  | -2.31 |
| 2239.9      | 19 | O15173      | R.LKPGPEEPTDEE LKPGPEEPTDEE[243.0297][T181.014] 3    | 0.76   | 0.008    | -0.004 | 1 | 28.03 | 20 | 123 | 9  | 223  | -1.86 |
| 1751.7      | 17 | O15231      | R.RESCGSSVLTDFEG RES[166.9984]C[160.0307]GSS 2       | -0.918 | 0.042    | -0.002 | 1 | 21.18 | 20 | 189 | 14 | 689  | -1.14 |
| 1354.6      | 5  | O15231      | R.QSSPSGSEQLVR.R QSS[166.9984]PSGSEQLVR 2            | -0.302 | 0.011    | -0.003 | 0 | 26.34 | 19 | 189 | 14 | 689  | -2.39 |
| 3473.5      | 16 | O15231      | R.GGQGDPAVPTQQI GGQGDPAVPTQQADPST[181.014] 3         | 1.41   | 5.90E-04 | -0.008 | 0 | 38.68 | 19 | 189 | 14 | 689  | -2.17 |
| 3473.5      | 27 | O15231      | R.GGQGDPAVPTQQI GGQGDPAVPTQQADPST[166.9984] 3        | 1.41   | 8.30E-04 | -0.008 | 0 | 37.21 | 19 | 189 | 14 | 689  | -2.17 |
| 2910.2      | 14 | O15231      | R.RSSTSGDTEEEEE RSSTSGD[181.014]EEEEEEVV 3           | 1.41   | 0.002    | -0.007 | 1 | 34.78 | 20 | 189 | 14 | 689  | -2.51 |
| 1751.7      | 9  | O15231      | R.RESCGSSVLTDFEG RESC[160.0307]GSS[166.9984]S 3      | 1.129  | 0.004    | -0.002 | 1 | 31.62 | 20 | 173 | 15 | 689  | -1.43 |
| 2154.9      | 19 | O15231      | R.GGQGDPAVPTQQI GGQGDPAVPTQQADPST[181.014] 2         | 1.528  | 1.70E-04 | -0.005 | 0 | 45.54 | 20 | 173 | 15 | 689  | -2.45 |
| 3553.5      | 17 | O15231      | R.GGQGDPAVPTQQI GGQGDPAVPTQQADPST[181.014] 3         | 1.472  | 1.20E-04 | -0.008 | 0 | 45.72 | 19 | 200 | 15 | 689  | -2.27 |
| 3490.5      | 19 | O15231      | R.GGQGDPAVPTQQI GGQGDPAVPTQQADPST[166.9984] 3        | 1.544  | 3.40E-04 | -0.011 | 1 | 41.46 | 19 | 173 | 15 | 689  | -3.17 |
| 3490.5      | 7  | O15231      | R.GGQGDPAVPTQQI GGQGDPAVPTQQADPST[181.014] 3         | 1.655  | 2.60E-04 | -0.011 | 1 | 42.56 | 19 | 148 | 13 | 689  | -3.17 |
| 3553.5      | 17 | O15231      | R.GGQGDPAVPTQQI GGQGDPAVPTQQADPST[166.9984] 3        | 1.655  | 1.00E-05 | -0.008 | 0 | 56.54 | 19 | 148 | 13 | 689  | -2.27 |
| 2910.2      | 22 | O15231      | R.RSSTSGDTEEEEE RSST[181.014]SGDTEEEEEVV 3           | 1.394  | 5.30E-04 | -0.007 | 1 | 40.17 | 20 | 167 | 11 | 689  | -2.51 |
| 3553.5      | 8  | O15231      | R.GGQGDPAVPTQQI GGQGDPAVPTQQADPST[166.9984] 3        | 1.394  | 2.50E-04 | -0.008 | 0 | 42.58 | 19 | 167 | 11 | 689  | -2.27 |
| 2910.2      | 23 | O15231      | R.RSSTSGDTEEEEE RS[166.9984]SGDTEEEEEVV 3            | 1.26   | 0.003    | -0.007 | 1 | 33    | 20 | 120 | 11 | 689  | -2.51 |
| 2910.2      | 15 | O15231      | R.RSSTSGDTEEEEE RSST[166.9984]GDTEEEEEVV 3           | 1.374  | 6.10E-04 | -0.007 | 1 | 39.61 | 20 | 162 | 12 | 689  | -2.51 |
| 3490.5      | 6  | O15231      | R.GGQGDPAVPTQQI GGQGDPAVPTQQADPST[181.014] 3         | 0.671  | 0.012    | -0.011 | 1 | 26.05 | 19 | 162 | 12 | 689  | -3.17 |
| 3553.5      | 28 | O15231      | R.GGQGDPAVPTQQI GGQGDPAVPTQQADPST[181.014] 3         | 1.374  | 4.00E-04 | -0.008 | 0 | 40.48 | 19 | 162 | 12 | 689  | -2.27 |
| 1260.6      | 8  | O15231      | R.ATSFSSAGEV.PK.P ATS[166.9984]FSSAGEV.PK 2          | 0.283  | 0.002    | -0.002 | 0 | 34.16 | 21 | 200 | 15 | 689  | -1.8  |
| 2990.1      | 17 | O15231      | R.RSSTSGDTEEEEE RSST[181.014]S[166.9984]GDT 3        | 1.191  | 0.003    | -0.01  | 1 | 30.26 | 18 | 148 | 13 | 689  | -3.42 |
| 2415        | 15 | O15234      | K.STVTGERQSGDQI STVTGERQ[166.9984]GDQES 3            | 1.23   | 0.003    | -0.005 | 1 | 33.7  | 21 | 59  | 5  | 703  | -2.13 |
| 2502.2      | 18 | O15234      | R.LEQTSVRDPEAD LEQTSVRDPS[166.9984]PEADA 3           | 1.41   | 9.10E-04 | -0.005 | 1 | 38.67 | 21 | 59  | 5  | 703  | -2.13 |
| 2415        | 12 | O15234      | K.STVTGERQSGDQI STVT[181.014]GERQSGDQEST 2           | -0.369 | 0.012    | -0.007 | 1 | 27.7  | 21 | 46  | 3  | 703  | -2.75 |
| 1982.8      | 16 | O15258      | K.VDPSLMEDSDGQI VDPSLMEDS[166.9984]DDGQPSI 2         | 0.765  | 8.90E-04 | -0.006 | 0 | 38.01 | 20 | 39  | 2  | 196  | -3.15 |
| 1758.7      | 7  | O15320,AFU  | R.SNSELEDEILCLE.D SNS[166.9984]ELEDEILC[160.0307] 2  | -0.097 | 0.007    | -0.003 | 0 | 30.36 | 21 | 37  | 2  | 196  | -1.93 |
| 1118.5      | 5  | O15320,Q96R | R.SFNMPSLDK.M SFNMP[166.9984]LDK 2                   | -0.607 | 0.022    | -0.002 | 0 | 20.29 | 16 | 51  | 2  | 548  | -1.08 |
| 3728.3      | 6  | O15371      | R.VYSLPDGTFSSDEDI VYS[166.9984]LPGTFSS[166.9984] 3   | 0.163  | 0.036    | -0.004 | 0 | 17.03 | 15 | 17  | 3  | 548  | -1.56 |
| 3195.4      | 20 | O15371      | R.DNSDFLLTSETAI DNSDFLLTSETAINEPQDEGN. 3             | 0.572  | 0.015    | -0.006 | 0 | 25.08 | 19 | 25  | 2  | 548  | -1.88 |
| 3728.3      | 25 | O15371      | R.VYSLPDGTFSSDEDI VYSLPDGTFSS[166.9984]S[166.9984] 3 | 0.698  | 0.011    | -0.004 | 0 | 22.31 | 15 | 26  | 3  | 548  | -1.06 |
| 3728.3      | 18 | O15371      | R.VYSLPDGTFSSDEDI VYSLPDGTFSS[166.9984]S 3           | 1.174  | 0.004    | -0.004 | 0 | 27.09 | 15 | 60  | 2  | 548  | -1.06 |
| 2823.2      | 20 | O15417      | K.ATDGLAQEPGGI ATDGLAQEPGGI[166.9984]FSS[166.9984] 3 | 2.275  | 2.50E-04 | -0.008 | 1 | 44.08 | 21 | 44  | 5  | 2968 | -2.71 |
| 2823.2      | 23 | O15417      | K.ATDGLAQEPGGI ATDGLAQEPGGI[166.9984]FSS[166.9984] 3 | 2.522  | 1.40E-04 | -0.008 | 1 | 46.57 | 21 | 47  | 6  | 2968 | -2.71 |
| 1933.9      | 9  | O15438      | R.QLSALSDDGEGQI QLSALS[166.9984]DDEGGQRP 3           | 0.144  | 0.037    | -0.003 | 1 | 22.84 | 21 | 23  | 6  | 1527 | -1.72 |
| 2013.9      | 9  | O15438      | R.QLSALSDDGEGQI QLS[166.9984]ALS[166.9984]S 3        | 0.193  | 0.036    | -0.004 | 1 | 23.28 | 21 | 26  | 12 | 1527 | -1.97 |
| 1933.9      | 9  | O15438      | R.QLSALSDDGEGQI QLSALS[166.9984]S[166.9984]S 3       | 0.354  | 0.023    | -0.003 | 1 | 24.97 | 21 | 37  | 9  | 1527 | -1.72 |
| 1933.9      | 10 | O15438      | R.QLSALSDDGEGQI QLS[166.9984]ALSDDGEGQRP 3           | 1.639  | 0.001    | -0.003 | 1 | 37.75 | 21 | 63  | 10 | 1527 | -1.36 |
| 1945.9      | 11 | O15439      | K.DNEESEQPPVPTG DNEESEQPPVPTG[181.014]PTU 2          | -0.101 | 0.007    | -0.005 | 0 | 30.35 | 21 | 30  | 3  | 1325 | -2.71 |
| 2073.9      | 9  | O15439      | K.DNEESEQPPVPTG DNEESEQPPVPTG[181.014]PT 2           | 0.027  | 0.049    | -0.004 | 1 | 21.62 | 21 | 40  | 5  | 1325 | -2.71 |
| 2122        | 11 | O15446      | K.QEQINTEPLEDTVLS QEQINTEPLEDTVLS[166.9984]P 2       | 1.978  | 4.50E-06 | -0.002 | 0 | 61.68 | 21 | 91  | 4  | 510  | -0.95 |
| 2946.3      | 13 | O15446      | R.MPETVQPEEMPGP MPETVQPEEMPGPLNS[166.9984] 3         | 1.973  | 5.20E-04 | -0.006 | 0 | 41.13 | 21 | 91  | 4  | 510  | -1.96 |
| 2250.1      | 19 | O15446      | K.QEQINTEPLEDTVLS QEQINTEPLEDTVLS[166.9984]P 3       | 0.873  | 0.007    | -0.004 | 1 | 29.06 | 20 | 104 | 6  | 510  | -1.54 |
| 2122        | 9  | O15446      | K.QEQINTEPLEDTVLS QEQINTEPLEDTVLSPT[181.014] 2       | 2.085  | 7.30E-06 | -0.002 | 0 | 59.55 | 21 | 104 | 6  | 510  | -0.95 |
| 2946.3      | 19 | O15446      | R.MPETVQPEEMPGP MPETVQPEEMPGPLNS[166.9984] 3         | 0.794  | 0.008    | -0.006 | 0 | 29.37 | 21 | 106 | 5  | 510  | -1.96 |
| 2250.1      | 10 | O15446      | K.QEQINTEPLEDTVLS QEQINTEPLEDTVLSPT[181.014]VLSPT 3  | 0.167  | 0.035    | -0.004 | 1 | 22.01 | 20 | 70  | 4  | 510  | -1.54 |
| 2134        | 9  | O15530,Q6A1 | R.ANSFVGTQAQVSP.E ANS[166.9984]VGTQAQVSP.E 2         | 1.035  | 4.60E-04 | -0.004 | 0 | 41.57 | 21 | 42  | 2  | 510  | -1.82 |
| 1906.7      | 6  | O43159      | K.GQPPCSDSEEVER GQPPC[160.0307]S[166.9984]I 2        | -0.932 | 0.047    | -0.004 | 1 | 19.04 | 18 | 19  | 2  | 456  | -2.33 |
| 964.45      | 5  | O43159      | K.TEVSPPVPR.T TEVS[166.9984]PVPR 2                   | -0.529 | 0.019    | -0.002 | 0 | 23.1  | 18 | 27  | 5  | 456  | -2.32 |
| 1492.6      | 6  | O43166      | R.TLSDSEIYNSQR.E T[166.9984]DESIYNSQR 2              | 0.628  | 0.001    | -0.006 | 0 | 35.42 | 19 | 58  | 8  | 1804 | -3.96 |
| 1664.8      | 16 | O43166      | K.KLDLESPTPESQK.S KLDLESPT[181.014]PESQK 2           | 0.299  | 0.002    | -0.002 | 1 | 34.54 | 21 | 49  | 12 | 1804 | -1.34 |
| 1664.8      | 7  | O43166      | K.KLDLESPTPESQK.S KLDLES[166.9984]PTPESQK 2          | 0.887  | 6.10E-04 | -0.002 | 1 | 40.13 | 21 | 58  | 8  | 1804 | -1.34 |
| 2252.8      | 20 | O43237      | K.DFQDYMEPEEGCQ.DFQDYMEPEEGC[160.0307]QG 2           | 0.522  | 0.002    | -0.005 | 0 | 33.58 | 18 | 34  | 3  | 1492 | -2.46 |
| 2704.1      | 20 | O43290      | R.SANGGESDGEENI SANGGES[166.9984]DGEENI 3            | 1.372  | 0.002    | -0.004 | 0 | 35.06 | 21 | 35  | 1  | 800  | -1.46 |
| 2704.1      | 15 | O43290      | R.SANGGESDGEENI SANGGES[166.9984]ESDGEENI 3          | 1.498  | 0.002    | -0.004 | 0 | 36.33 | 21 | 36  | 2  | 800  | -1.46 |
| 1185.7      | 7  | O43306      | R.ANSMEGLM.PR.W ANS[166.9984]MEGLM.PR 2              | 0.508  | 0.002    | -0.002 | 0 | 34.39 | 19 | 34  | 4  | 1168 | -1.83 |
| 1468.6      | 13 | O43306      | R.DAEPSPPTAGP.PR.DAEPSP[166.9984]PTAGP.PR 2          | -0.857 | 0.038    | -0.005 | 0 | 21.76 | 20 | 40  | 2  | 1168 | -3.67 |
| 1517.5      | 10 | O43395      | K.GDDDEESDEEAVK.GDDDEES[166.9984]DEEAVK 2            | 0.698  | 9.60E-04 | -0.003 | 0 | 34.34 | 17 | 43  | 2  | 683  | -1.7  |
| 1645.6      | 8  | O43395      | K.GDDDEESDEEAVK.GDDDEES[166.9984]DEEAVK 2            | -0.296 | 0.009    | -0.003 | 1 | 26.4  | 19 | 43  | 2  | 683  | -2.03 |
| 3409.4      | 26 | O43422      | K.ETNNSNAQN.PSEEE ETNNSNAQN[166.9984]EEEG 3          | 2.682  | 3.70E-05 | -0.007 | 0 | 51.95 | 20 | 52  | 2  | 761  | -2.02 |
| 960.48      | 5  | O43491      | K.SYTLV.VAK.D S[166.9984]YTLV.VAK 2                  | -0.168 | 0.007    | -0.001 | 0 | 30.63 | 22 | 31  | 2  | 1005 | -1.48 |
| 2068.9      | 8  | O43493      | K.DSPSKSAAEQ.PEI DSPSKS[166.9984]AAEQ.PTEP 2         | 1.588  | 1.20E-04 | -0.003 | 1 | 47.24 | 21 | 54  | 5  | 480  | -1.56 |
| 2067.9      | 17 | O43493      | K.TESGEETDLSP.PQE TES[166.9984]GEETDLSP.PQE 2        | -0.784 | 0.028    | -0.005 | 0 | 24.52 | 22 | 54  | 5  | 480  | -2.44 |
| 2068.9      | 13 | O43493      | K.DSPSKSAAEQ.PEI DSPS[166.9984]KSSAAEQ.PTEP 3        | 2.013  | 4.90E-04 | -0.004 | 1 | 41.48 | 21 | 88  | 5  | 480  | -1.9  |
| 2068.9      | 7  | O43493      | K.DSPSKSAAEQ.PEI DSPSKS[166.9984]AAEQ.PTEP 2         | 1.588  | 1.30E-04 | -0.003 | 1 | 47.17 | 21 | 76  | 5  | 480  | -1.56 |
| 2067.9      | 22 | O43493      | K.TESGEETDLSP.PQE T[181.014]ESGEETDLSP.PQE 2         | -0.462 | 0.013    | -0.005 | 0 | 27.74 | 22 | 84  | 7  | 480  | -2.44 |
| 2797.2      | 28 | O43583      | K.LTVENSPKQ.EAGIS LTVENS[166.9984]PKQ.EAGISEC 3      | 1.668  | 7.00E-07 | -0.007 | 1 | 69.89 | 21 | 70  | 2  | 198  | -2.68 |
| 2797.2      | 18 | O43583      | K.LTVENSPKQ.EAGIS LTVENS[166.9984]PKQ.EAGISEC 3      | 1.394  | 1.30E-05 | -0.007 | 1 | 57.09 | 21 | 57  | 3  | 198  | -2.68 |
| 1942.8      | 12 | O43598      | R.YFEADPPGQ.VAASF YFEADPPGQ.VAASF[166.9984]PL 2      | -0.47  | 0.016    | -0.004 | 0 | 25.59 | 20 | 26  | 1  | 174  | -2.03 |
| 1256.6      | 9  | O43707      | K.DHGGALG.PE.FEK.DHGGALG.PE.FEK 2                    | 1.903  | 6.70E-05 | -0.002 | 0 | 50.39 | 21 | 111 | 5  | 911  | -1.58 |
| 1775.8      | 15 | O43707      | K.DDPVTNLNNA.FEV DDPVTNLNNA.FEV 2                    | 1.738  | 1.00E-04 | -0.004 | 0 | 48.74 | 21 | 111 | 5  | 911  | -1.98 |
| 1741.8      | 9  | O43707      | R.ETTTDTADQ.VIAS ETTTDTADQ.VIASFK 2                  | 1.632  | 1.30E-04 | -0.004 | 0 | 46.54 | 20 | 128 | 3  | 911  | -2.23 |
| 043707.P128 | 10 | O43707      | R.FAIQIDISVEETSAK.I FAIQIDS[166.9984]VEETSAK 2       | 1.924  | 6.80E-05 | -0.002 | 0 | 50.6  | 21 | 111 | 11 | 111  | -1.18 |
| 2361.7      | 7  | O43719      | K.ELEENDSEN.FEDI ELEENDSEN[166.9984]ENS[166.9984] 2  | 0.524  | 0.001    | -0.004 | 0 | 30.6  | 15 | 192 | 13 | 755  | -1.89 |
| 2441.7      | 9  | O43719      | K.ELEENDSEN.FEDI ELEENDSEN[166.9984]ENS[166.9984] 2  | 1.485  | 1.50E-04 | -0.004 | 0 | 38.21 | 13 | 192 | 13 | 755  | -1.64 |
| 1291.5      | 9  | O43719      | K.LFEEDDSEN.NEKL LFEEDDSEN[166.9984]NEKL 2           | 1.944  | 6.60E-05 | -0.003 | 0 | 45.8  | 16 | 192 | 13 | 755  | -2.06 |
| 2271.8      | 16 | O43719      | K.VFDDSEDEK.EEY.VFDDSE[166.9984]DEK.EEY 3            | 1.016  | 0.005    | -0.005 | 1 | 27.56 | 17 | 192 | 13 | 755  | -2.35 |
| 1921.7      | 20 | O43719      | K                                                    |        |          |        |   |       |    |     |    |      |       |

|        |    |        |                   |                                 |   |        |          |          |   |       |    |     |    |      |       |
|--------|----|--------|-------------------|---------------------------------|---|--------|----------|----------|---|-------|----|-----|----|------|-------|
| 1328.6 | 10 | O60293 | R.RISTSDILSEK.K   | RISTS[166.9984]DILSEK           | 2 | -0.73  | 0.026    | -0.002   | 1 | 24.99 | 22 | 67  | 8  | 1989 | -1.43 |
| 1757.9 | 8  | O60312 | R.YQAEDESEEVVPR   | YQAEDES[166.9984]EEVEVPR        | 3 | -0.599 | 0.021    | -0.003   | 0 | 24.34 | 20 | 24  | 2  | 1499 | -1.7  |
| 2460.1 | 25 | O60318 | K.KPGDGEVSPSTEDA  | KPGDGEVSPS[166.9984]TEDAP       | 3 | 0.644  | 0.011    | -0.002   | 1 | 27.87 | 21 | 28  | 6  | 1980 | -1.01 |
| 811.42 | 4  | O60320 | R.SILSRRLR.E      | SILSRRLR[166.9984]RJR           | 2 | 0.23   | 0.003    | -0.002   | 1 | 33.63 | 21 | 34  | 2  | 539  | -2.03 |
| 3606.6 | 25 | O60341 | K.KLPPPPPPAPPEEIE | KLPPPPPPAPPEEINES[166.9984]     | 3 | 1.581  | 0.001    | -0.01    | 1 | 36.14 | 20 | 58  | 3  | 852  | -2.7  |
| 2597.9 | 10 | O60341 | R.EMDESANLSEDEY   | EMDESANLSEDES[166.9984]EDEY?    | 2 | 1.092  | 4.40E-04 | -0.006   | 0 | 38.18 | 17 | 58  | 3  | 852  | -2.14 |
| 2597.9 | 8  | O60341 | R.EMDESANLSEDEY   | EMDESANLSEDEY[243.0297]Y?       | 2 | 1.3    | 2.70E-04 | -0.006   | 0 | 40.29 | 17 | 73  | 6  | 852  | -2.14 |
| 2023.9 | 10 | O60353 | R.LREQDCGEPASPA   | LREQDC[160.0307]GEPAS[166.9984] | 3 | 0.132  | 0.039    | -0.005   | 1 | 22.68 | 21 | 23  | 1  | 706  | -2.7  |
| 2676.2 | 19 | O60502 | K.LENEDGSDIEDTIV  | LENEDGS[166.9984]DEDIETDVLV     | 3 | 0.514  | 0.017    | -0.002   | 0 | 26.47 | 21 | 45  | 3  | 916  | -0.84 |
| 3709.5 | 23 | O60502 | K.ESIAESKPEMSMQE  | ESIAESKS[166.9984]PEMSMQE       | 3 | 1.018  | 0.005    | -0.001   | 1 | 31.53 | 21 | 49  | 6  | 916  | -0.39 |
| 1535.7 | 10 | O60504 | R.LCDDGDPQLTSPR   | L[160.0307]DGGPQLTSPS[166.9984] | 2 | 2.675  | 1.00E-05 | -0.003   | 0 | 58.11 | 21 | 58  | 4  | 671  | -2.01 |
| 2474   | 11 | O60524 | R.NPYLLSEEDDDVD   | NPYLLS[166.9984]EEEDDDVDG       | 2 | 1.978  | 3.60E-07 | -0.008   | 0 | 71.65 | 20 | 72  | 1  | 1076 | -3.2  |
| 1638.8 | 8  | O60524 | K.KLPSDSDGLEALEGI | KLPSDSDGLEALEGK[166.9984]       | 3 | -0.078 | 0.006    | -0.003   | 1 | 31.55 | 22 | 32  | 3  | 1076 | -1.64 |
| 1742.8 | 10 | O60583 | K.QGQSQASSSSVTS   | QGQSQASSSSVTS[166.9984]P        | 2 | 1.354  | 2.50E-04 | -0.004   | 0 | 44.9  | 21 | 45  | 2  | 730  | -2.15 |
| 2198   | 6  | O60675 | K.EAGENAPVLSDDDEL | EAGENAPVLS[166.9984]DDELV       | 3 | -0.688 | 0.026    | -0.006   | 0 | 24.41 | 21 | 30  | 4  | 156  | -2.57 |
| 3714.4 | 21 | O60678 | R.GAVENEEDLPESLD  | GAVENEEDLPESLS[166.9984]DS      | 3 | 1.303  | 0.002    | -0.009   | 0 | 32.36 | 19 | 32  | 1  | 531  | -2.55 |
| 3634.5 | 29 | O60678 | R.GAVENEEDLPESLD  | GAVENEEDLPESLS[166.9984]C       | 3 | 2.831  | 2.20E-06 | -0.005   | 0 | 63.9  | 20 | 64  | 2  | 531  | -1.44 |
| 1444.6 | 16 | O60716 | K.SDFQVNLNNSAR.S  | SDFQVNLNNSAR[166.9984]JR        | 2 | -0.157 | 0.008    | 8.00E-04 | 0 | 28.74 | 20 | 29  | 10 | 968  | 0.54  |
| 2000.9 | 17 | O60716 | R.SQSSHSYDDSTPLI  | SQSSHSY[166.9984]HSYDDSTPLID    | 2 | -0.586 | 0.021    | -0.004   | 0 | 25.4  | 21 | 53  | 10 | 968  | -1.95 |
| 2000.9 | 20 | O60716 | R.SQSSHSYDDSTPLI  | SQSSHSY[243.0297]JDDSTPLID      | 3 | 1.111  | 0.004    | -0.003   | 0 | 32.44 | 21 | 53  | 10 | 968  | -1.45 |
| 2000.9 | 12 | O60716 | R.SQSSHSYDDSTPLI  | SQSSHSY[166.9984]YDDSTPLID      | 3 | 1.074  | 0.005    | -0.003   | 0 | 32.09 | 21 | 52  | 3  | 968  | -1.45 |
| 2000.9 | 8  | O60716 | R.SQSSHSYDDSTPLI  | SQSSHSY[166.9984]HSYDDSTPLID    | 3 | 0.564  | 0.015    | -0.003   | 0 | 27.04 | 21 | 45  | 6  | 968  | -1.45 |
| 2080.8 | 19 | O60716 | R.SQSSHSYDDSTPLI  | SQSSHSY[166.9984]Y              | 2 | -0.334 | 0.013    | -0.004   | 0 | 26.92 | 20 | 53  | 10 | 968  | -1.84 |
| 1226.6 | 7  | O60716 | R.GSLASLDRK.G     | GSLASLDRK[166.9984]LDRK         | 2 | -0.795 | 0.037    | -0.002   | 1 | 21.27 | 19 | 62  | 11 | 968  | -1.8  |
| 3403.2 | 26 | O60763 | K.DLGHVVEEEDLES   | DLGHVVEEEDLES[166.9984]GI       | 3 | 0.369  | 0.021    | -0.008   | 0 | 21.09 | 17 | 50  | 2  | 962  | -2.32 |
| 3323.2 | 19 | O60763 | K.DLGHVVEEEDLES   | DLGHVVEEEDLES[166.9984]GI       | 3 | 1.41   | 9.50E-05 | -0.008   | 0 | 46.08 | 18 | 50  | 2  | 962  | -2.31 |
| 3916.5 | 17 | O60763 | K.DLGHVVEEEDLES   | DLGHVVEEEDLES[166.9984]GI       | 4 | 0.191  | 0.001    | -0.005   | 1 | 35.93 | 19 | 117 | 3  | 962  | -1.38 |
| 3243.3 | 23 | O60763 | K.DLGHVVEEEDLES   | DLGHVVEEEDLES[166.9984]GI       | 3 | 1.394  | 1.90E-05 | -0.008   | 0 | 54.29 | 20 | 131 | 4  | 962  | -2.57 |
| 1786.7 | 15 | O60832 | K.AGLSEGAEPGGDD   | AGLSEGAEPGGDD[166.9984]G        | 2 | 0.001  | 0.006    | -0.004   | 0 | 29.37 | 19 | 114 | 12 | 514  | -2.06 |
| 1914.8 | 17 | O60832 | K.AGLSEGAEPGGDD   | AGLSEGAEPGGDD[166.9984]G        | 2 | 0.956  | 5.70E-04 | -0.004   | 1 | 39.92 | 20 | 114 | 12 | 514  | -2.37 |
| 1866.7 | 10 | O60832 | K.AGLSEGAEPGGDD   | AGLSEGAEPGGDD[166.9984]G        | 2 | -0.157 | 0.007    | -0.004   | 0 | 25.79 | 17 | 114 | 12 | 514  | -2.25 |
| 1786.7 | 10 | O60832 | K.AGLSEGAEPGGDD   | AGLSEGAEPGGDD[166.9984]C        | 2 | 1.978  | 1.00E-05 | -0.004   | 0 | 56.66 | 19 | 114 | 12 | 514  | -2.34 |
| 884.37 | 7  | O60832 | K.EVELVSE.-       | EVELVSE[166.9984]E              | 1 | -0.814 | 0.041    | -0.002   | 0 | 19.86 | 18 | 114 | 12 | 514  | -2.21 |
| 1914.8 | 8  | O60832 | K.AGLSEGAEPGGDD   | AGLSEGAEPGGDD[166.9984]C        | 3 | 1.289  | 0.003    | -0.003   | 1 | 33.29 | 20 | 114 | 12 | 514  | -2.33 |
| 1994.8 | 15 | O60832 | K.AGLSEGAEPGGDD   | AGLSEGAEPGGDD[166.9984]G        | 2 | -0.136 | 0.007    | -0.005   | 1 | 26.95 | 18 | 148 | 9  | 514  | -1.79 |
| 2007.9 | 18 | O60832 | R.ESESEDETTPAAPQ  | ESESEDETTPAAPQ[166.9984]Q       | 2 | -0.685 | 0.027    | -0.005   | 0 | 24.44 | 21 | 160 | 9  | 514  | -2.29 |
| 1786.7 | 13 | O60832 | K.AGLSEGAEPGGDD   | AGLSEGAEPGGDD[166.9984]G        | 2 | -0.806 | 0.037    | -0.004   | 0 | 21.23 | 19 | 160 | 9  | 514  | -2.23 |
| 2007.9 | 18 | O60832 | R.ESESEDETTPAAPQ  | ESESEDETTPAAPQ[166.9984]Q       | 2 | -0.184 | 0.008    | -0.005   | 0 | 29.55 | 21 | 187 | 7  | 514  | -2.29 |
| 2007.9 | 12 | O60832 | R.ESESEDETTPAAPQ  | ESESEDETTPAAPQ[166.9984]Q       | 2 | 2.583  | 1.50E-05 | -0.005   | 0 | 57.05 | 21 | 199 | 9  | 514  | -2.39 |
| 2113.9 | 21 | O60841 | K.NKPGPNIESGNECD  | NKPGPNIESGNECD[166.9984]G       | 3 | 0.894  | 0.007    | -0.004   | 1 | 30.34 | 21 | 172 | 9  | 1220 | -1.9  |
| 2080.8 | 8  | O60841 | K.QSFDDNDESELEDK  | QSFDDNDESELEDK[166.9984]E       | 2 | -0.963 | 0.049    | -0.005   | 1 | 19.73 | 19 | 172 | 9  | 1220 | -2.52 |
| 1816.6 | 10 | O60841 | K.VEMYSGSDDDDDF   | VEMYSGSDDDDDF[166.9984]F        | 2 | 1.843  | 7.80E-05 | -0.004   | 0 | 44.79 | 16 | 172 | 9  | 1220 | -2.5  |
| 1958.7 | 15 | O60841 | K.KQSFDDNDESELEDK | KQSFDDNDESELEDK[166.9984]E      | 2 | 1.978  | 1.40E-05 | -0.005   | 1 | 52.29 | 16 | 172 | 9  | 1220 | -2.75 |
| 1618.6 | 9  | O60841 | K.KWDSGSEEDNSK    | KWDSGSEEDNSK[166.9984]K         | 2 | 0.177  | 0.003    | -0.002   | 1 | 30.13 | 18 | 172 | 9  | 1220 | -1.2  |
| 2154.9 | 16 | O60841 | K.VEMYSGSDDDDDF   | VEMYSGSDDDDDF[166.9984]F        | 3 | 0.352  | 0.025    | -0.004   | 1 | 22.85 | 19 | 132 | 10 | 1220 | -1.68 |
| 1816.6 | 7  | O60841 | K.VEMYSGSDDDDDF   | VEMYSGSDDDDDF[166.9984]F        | 2 | 0.485  | 0.002    | -0.004   | 0 | 31.11 | 16 | 132 | 10 | 1220 | -2.5  |
| 1896.6 | 16 | O60841 | K.VEMYSGSDDDDDF   | VEMYSGSDDDDDF[166.9984]G        | 2 | 1.868  | 7.70E-05 | -0.004   | 0 | 41.94 | 13 | 132 | 10 | 1220 | -2.3  |
| 3928.5 | 28 | O60841 | K.EETPPVPEEEDDT   | EETPPVPEEEDDT[166.9984]D        | 3 | 0.577  | 0.014    | -0.007   | 0 | 25.1  | 19 | 132 | 10 | 1220 | -1.89 |
| 1896.7 | 7  | O60841 | K.VEMYSGSDDDDDF   | VEMYSGSDDDDDF[166.9984]G        | 2 | 1.236  | 3.30E-04 | -0.004   | 0 | 35.65 | 13 | 217 | 11 | 1220 | -2.3  |
| 1871.7 | 11 | O60841 | K.PGPNIESGNECD    | PGPNIESGNECD[166.9984]G         | 2 | 0.937  | 5.60E-04 | -0.003   | 0 | 39.7  | 20 | 195 | 11 | 1220 | -1.81 |
| 3928.5 | 29 | O60841 | K.EETPPVPEEEDDT   | EETPPVPEEEDDT[166.9984]D        | 3 | 0.89   | 0.007    | -0.007   | 0 | 28.26 | 19 | 140 | 9  | 1220 | -1.89 |
| 2234.8 | 12 | O60841 | K.VEMYSGSDDDDDF   | VEMYSGSDDDDDF[166.9984]G        | 3 | 0.308  | 0.023    | -0.003   | 1 | 21.41 | 18 | 132 | 10 | 1220 | -1.49 |
| 2041.8 | 16 | O60841 | K.PKVMYSGSDDDDD   | PKVMYSGSDDDDD[166.9984]D        | 2 | 1.332  | 2.20E-04 | 0.001    | 1 | 42.61 | 19 | 217 | 11 | 1220 | 0.71  |
| 2036.8 | 21 | O60841 | R.INSSGSDGSEDEFL  | INSSGSDGSEDEFL[166.9984]C       | 2 | 2.241  | 4.80E-06 | -0.005   | 0 | 60.41 | 20 | 280 | 12 | 1220 | -2.33 |
| 1715.7 | 10 | O60885 | K.SKPPPTYESEEDK   | SKPPPTYESEEDK[166.9984]E        | 2 | -0.499 | 0.017    | -0.002   | 1 | 25.27 | 20 | 24  | 5  | 1362 | -1.3  |
| 2353.1 | 9  | O60885 | K.MPDEPEEPVAVS    | MPDEPEEPVAVS[166.9984]P         | 3 | 1.811  | 7.80E-04 | -0.003   | 0 | 38.54 | 20 | 44  | 2  | 1362 | -1.4  |
| 1240.6 | 7  | O60934 | R.IPNYQLSPTK.L    | IPNYQLSPTK[166.9984]PTK         | 2 | -0.967 | 0.043    | -0.002   | 0 | 21.69 | 21 | 22  | 3  | 754  | -1.94 |
| 2312.9 | 8  | O75151 | K.DSDVYVPSLESDI   | DSDVYVPSLES[166.9984]D          | 2 | 0.252  | 0.003    | -0.005   | 0 | 32.83 | 20 | 51  | 8  | 1096 | -2.13 |
| 1316.5 | 6  | O75151 | K.GSDADAPVPTAR.V  | GSDADAPVPTAR[166.9984]PTAR      | 2 | -0.517 | 0.016    | -0.002   | 0 | 24.12 | 19 | 33  | 3  | 1096 | -1.93 |
| 4208.7 | 15 | O75152 | K.VESSENVSPTHPPV  | VESSENVSPTHPPV[166.9984]V       | 4 | 0.028  | 0.038    | -0.008   | 0 | 20.97 | 19 | 21  | 3  | 810  | -1.86 |
| 4288.7 | 26 | O75152 | K.VESSENVSPTHPPV  | VESSENVSPTHPPV[166.9984]V       | 4 | 0.246  | 0.007    | -0.006   | 0 | 27.8  | 18 | 36  | 2  | 810  | -1.48 |
| 4288.7 | 22 | O75152 | K.VESSENVSPTHPPV  | VESSENVSPTHPPV[166.9984]V       | 4 | 0.191  | 0.004    | -0.006   | 0 | 29.39 | 18 | 29  | 3  | 810  | -1.48 |
| 4288.7 | 33 | O75152 | K.VESSENVSPTHPPV  | VESSENVSPTHPPV[166.9984]V       | 4 | -0.11  | 0.002    | -0.006   | 0 | 32.46 | 18 | 47  | 3  | 810  | -1.48 |
| 4288.7 | 28 | O75152 | K.VESSENVSPTHPPV  | VESSENVSPTHPPV[166.9984]V       | 4 | 0.206  | 0.001    | -0.006   | 0 | 35.92 | 18 | 46  | 2  | 810  | -1.48 |
| 4208.7 | 17 | O75152 | K.VESSENVSPTHPPV  | VESSENVSPTHPPV[166.9984]V       | 4 | 0.15   | 2.00E-04 | -0.008   | 0 | 43.86 | 19 | 60  | 3  | 810  | -1.86 |
| 2298.9 | 18 | O75153 | K.SEDPPQGEAGESEE  | SEDPPQGEAGESEE[166.9984]E       | 2 | 1.509  | 1.50E-04 | -0.005   | 0 | 45.45 | 20 | 45  | 4  | 1309 | -2.01 |
| 2207   | 9  | O75367 | K.AASADSTTEGTPAD  | AASADSTTEGTPAD[166.9984]G       | 2 | 2.732  | 1.80E-06 | -0.007   | 0 | 64.20 | 20 | 65  | 1  | 372  | -3.01 |
| 2207   | 9  | O75367 | K.AASADSTTEGTPAD  | AASADSTTEGTPAD[166.9984]G       | 2 | 2.735  | 3.70E-06 | -0.007   | 0 | 61.85 | 20 | 65  | 3  | 372  | -3.01 |
| 2207   | 10 | O75367 | K.AASADSTTEGTPAD  | AASADSTTEGTPAD[166.9984]G       | 2 | 0.447  | 0.002    | -0.005   | 0 | 34.69 | 20 | 102 | 6  | 372  | -2.24 |
| 2286.9 | 6  | O75367 | K.AASADSTTEGTPAD  | AASADSTTEGTPAD[166.9984]G       | 2 | -0.947 | 0.04     | -0.004   | 0 | 20.92 | 20 | 70  | 4  | 372  | -1.73 |
| 2286.9 | 8  | O75367 | K.AASADSTTEGTPAD  | AASADSTTEGTPAD[166.9984]G       | 2 | 0.753  | 8.40E-04 | -0.004   | 0 | 37.75 | 20 | 105 | 6  | 372  | -1.73 |
| 2286.9 | 9  | O75367 | K.AASADSTTEGTPAD  | AASADSTTEGTPAD[166.9984]G       | 2 | 1.401  | 1.80E-04 | -0.004   | 0 | 44.37 | 20 | 69  | 3  | 372  | -1.73 |
| 1573.7 | 5  | O75376 | K.AQLSPGIYDTSAR   | AQLSPGIYDTSAR[166.9984]S        | 2 | -0.412 | 0.015    | -0.004   | 0 | 27.24 | 21 | 49  | 12 | 2440 | -2.4  |
| 2446   | 19 | O75376 | K.HEAPSSPISGQPC   | HEAPSSPISGQPC[166.9984]P        | 3 | 1.132  | 0.004    | -0.005   | 0 | 30.72 | 19 | 49  | 12 | 2440 | -1.95 |
| 1212.9 | 9  | O75376 | R.MPIEDSSPEK.G    | MPIEDSSPEK[166.9984]PEK         | 2 | -0.914 | 0.042    | -0.002   | 0 | 20.12 | 19 | 45  | 10 | 2440 | -1.62 |
| 2446   | 9  | O75376 | K.HEAPSSPISGQPC   | HEAPSSPISGQPC[166.9984]P        | 3 | -0.886 | 0.038    | 0.002    | 0 | 21.49 | 20 | 62  | 14 | 2440 | 0.75  |
| 1080.5 | 10 | O75376 | R.VPENLVK.S       | VPENLVK[166.9984]PENLVK         | 2 | -0.66  | 0.025    | -0.002   | 0 | 22.79 | 19 | 59  | 13 | 2440 | -1.82 |
| 2065.8 | 13 | O75379 | R.NLLEDDSEDEEFLR  | NLLEDDSEDEEFLR[166.9984]E       | 2 | -0.765 | 0.031    | -0.003</ |   |       |    |     |    |      |       |

|        |    |              |                                                      |        |          |          |   |       |    |     |     |       |       |
|--------|----|--------------|------------------------------------------------------|--------|----------|----------|---|-------|----|-----|-----|-------|-------|
| 2538   | 19 | O94762       | K.YTGEEDGAGGHP; YTGEEDGAGGHS[166.9984]PAF 3          | 0.618  | 0.011    | -0.008   | 0 | 27.58 | 21 | 28  | 3   | 991   | -3.18 |
| 3080.2 | 15 | O94763       | R.SICEEATCSDTESIS[166.9984][160.0307]EEA1            | 0.268  | 0.028    | -0.007   | 0 | 23.08 | 20 | 23  | 1   | 535   | -2.22 |
| 2450.1 | 22 | O94826       | R.ASPAPGSGHPGPG AS[166.9984]PAGSGHPGPG# 3            | 0.404  | 0.022    | -0.005   | 0 | 25.4  | 21 | 25  | 1   | 608   | -2.14 |
| 2491.1 | 11 | O94842       | R.LSTTPTSPSLHEDG LSTTPT[166.9984]PT[181.014] 3       | 0.367  | 0.023    | -0.006   | 1 | 24.02 | 20 | 24  | 2   | 621   | -2.41 |
| 2943.3 | 18 | O94864       | K.TEESPLPSPCGSP TEESEPSP[166.9984]PGS[166.9984] 3    | 0.261  | 0.029    | -0.004   | 0 | 23.96 | 21 | 24  | 1   | 414   | -1.33 |
| 1255.6 | 8  | O94876       | K.FGSADNPNLKD FGS[166.9984]ADNPNLK 2                 | 1.978  | 7.40E-06 | -0.002   | 0 | 59.26 | 20 | 59  | 1   | 653   | -1.85 |
| 2226.9 | 17 | O94880       | R.NSADDEELNDSLNT NSADDEEL[181.014]NDS[166.9984] 3    | 0.167  | 0.004    | -0.003   | 0 | 31.03 | 19 | 31  | 2   | 888   | -1.46 |
| 1480.6 | 9  | O94925       | K.DGPGTDAFNGNED DGPGTDAFNGNSEG 2                     | 0.743  | 8.90E-04 | -0.004   | 0 | 38.72 | 21 | 39  | 1   | 669   | -2.41 |
| 2862.2 | 24 | O94979       | K.DSDQVAQSDGEE DSDQVAQS[166.9984]DGEES 3             | 2.471  | 1.90E-04 | -0.005   | 0 | 45.11 | 20 | 47  | 3   | 1220  | -1.84 |
| 2016.9 | 15 | O94979       | R.AQGEVAVAGHESPK AQGEVAVAGHES[166.9984]PKIP 3        | 0.117  | 0.042    | -0.004   | 1 | 21.57 | 20 | 47  | 3   | 1220  | -1.99 |
| 3460.4 | 22 | O94986       | K.DLLSDNGSESLPHS DLLS[166.9984]DNGSESLPHS1 4         | -0.048 | 0.045    | 0.002    | 1 | 20.31 | 19 | 20  | 3   | 1654  | 0.61  |
| 3603.2 | 19 | O94992       | K.SDDTSDDDFMEEG S[166.9984]DSDTSDDDFMEEG 3           | 1.544  | 0.002    | -0.008   | 0 | 28.83 | 13 | 58  | 3   | 359   | -2.22 |
| 3603.2 | 17 | O94992       | K.SDDTSDDDFMEEG SDDT[166.9984]DSDTSDDDFMEEG 3        | 1.544  | 6.60E-05 | -0.008   | 0 | 42.61 | 13 | 58  | 3   | 359   | -2.22 |
| 3523.2 | 25 | O94992       | K.SDDTSDDDFMEEG SDDT[166.9984]DSDTSDDDFMEEG 3        | 1.655  | 2.10E-04 | -0.005   | 0 | 40.21 | 16 | 57  | 3   | 359   | -1.3  |
| 1324.5 | 8  | O95067       | K.GSPPTPEDVSMK.E GPS[166.9984]PTPEDVSMK 2            | -0.43  | 0.015    | -0.002   | 0 | 24.09 | 18 | 24  | 2   | 398   | -1.78 |
| 1535.6 | 18 | O95155       | R.SQSMIDIGVSCCK.SQS[166.9984]MIDIGVSC[160.0307] 3    | 0.496  | 0.002    | -0.003   | 0 | 32.25 | 17 | 32  | 7   | 1302  | -2.24 |
| 1067.5 | 9  | O95171       | R.GQSLDNLK.V GQS[166.9984]DNLK 2                     | -0.703 | 0.03     | -0.002   | 0 | 23.23 | 20 | 27  | 5   | 688   | -1.91 |
| 1719.8 | 10 | O95171       | K.SSEQLDEHNVSP.SSEQLDEHNV[166.9984]PK 2              | -0.92  | 0.042    | -0.003   | 0 | 22.06 | 21 | 27  | 5   | 688   | -1.52 |
| 2015.8 | 18 | O95208       | R.GSSQPNTLSHSEQ GSS[166.9984]QPNLTSHSEQE 2           | -0.98  | 0.045    | -0.004   | 0 | 21.56 | 21 | 22  | 3   | 641   | -2.08 |
| 1593.6 | 11 | O95218       | K.YNLDASEEDSNK.YNLDA[166.9984]EEEDSNK 2              | 1.771  | 9.30E-05 | -0.004   | 0 | 45.07 | 17 | 140 | 7   | 330   | -2.18 |
| 1721.7 | 12 | O95218       | K.YNLDASEEDSNK.YNLDA[166.9984]EEEDSNK 2              | 0.642  | 0.001    | -0.004   | 1 | 36.78 | 20 | 140 | 7   | 330   | -2.28 |
| 2419.9 | 12 | O95218       | K.EVEDKESEGEDEE EVEDKES[166.9984]EGEEDD 2            | 1.978  | 1.70E-05 | -0.005   | 1 | 53.77 | 19 | 140 | 7   | 330   | -1.88 |
| 2545   | 21 | O95218       | R.ENVEYIEREESDGEY ENVEYIERES[166.9984]DGEYD 3        | 0.159  | 0.036    | -0.005   | 1 | 19.94 | 18 | 107 | 6   | 330   | -1.81 |
| 2103.8 | 11 | O95232       | K.NEVNGTSEDIKEG NEVNGTSEDIKS[166.9984]EGD 2          | 0.597  | 0.001    | -0.002   | 1 | 35.33 | 19 | 35  | 1   | 432   | -1.18 |
| 1722.7 | 11 | O95251       | R.SGSETEQVVFSD S[166.9984]GSETEQVVFSDR 2             | 0.488  | 0.002    | -0.004   | 0 | 34.24 | 19 | 34  | 1   | 611   | -2.23 |
| 1722.7 | 9  | O95251       | R.SGSETEQVVFSD S[166.9984]GSETEQVVFSDR 2             | 1.153  | 3.50E-04 | -0.004   | 0 | 40.82 | 19 | 56  | 3   | 611   | -2.23 |
| 4314.7 | 28 | O95251       | K.NTADHDESPRPT NTADHDESPRPT[181.014]PT[181.014] 4    | -0.092 | 0.021    | -0.014   | 1 | 22.37 | 18 | 52  | 2   | 611   | -3.12 |
| 4314.7 | 21 | O95251       | K.NTADHDESPRPT NTADHDESPRPT[181.014]PT[181.014] 4    | 0.319  | 0.002    | -0.014   | 1 | 33.89 | 18 | 56  | 3   | 611   | -3.12 |
| 1722.7 | 9  | O95251       | R.SGSETEQVVFSD S[166.9984]GSETEQVVFSDR 2             | 1.444  | 1.70E-04 | -0.004   | 0 | 43.83 | 19 | 44  | 1   | 611   | -2.23 |
| 1360.6 | 9  | O95292       | K.SLSLDDTEVK.K SLS[166.9984]SLSLDDTEVK 2             | 1.089  | 4.30E-04 | -0.002   | 0 | 41.25 | 20 | 41  | 2   | 243   | -1.2  |
| 1112.5 | 6  | O95297       | K.SPSDTEGLVK.S SPS[166.9984]DTEGLVK 2                | 0.029  | 0.005    | -0.002   | 0 | 31.65 | 21 | 117 | 6   | 269   | -2.25 |
| 1710.7 | 7  | O95297       | R.DYTGCTSESLSPVK DYTGC[160.0307]STSESLS[166.9984] 2  | 2.267  | 2.90E-05 | -0.004   | 0 | 53.03 | 20 | 117 | 6   | 269   | -2.35 |
| 1710.7 | 16 | O95297       | R.DYTGCTSESLSPVK DYTGC[160.0307]STSESLS[166.9984] 2  | 0.168  | 0.004    | -0.004   | 0 | 32.04 | 20 | 117 | 6   | 269   | -2.24 |
| 1710.7 | 10 | O95297       | R.DYTGCTSESLSPVK DYTGC[160.0307]STSESLS[166.9984] 2  | 0.735  | 9.80E-04 | -0.004   | 0 | 37.71 | 20 | 117 | 6   | 269   | -2.24 |
| 1218.5 | 8  | O95297       | K.SESVYVADIR.K SESVYV[243.0297]ADIR 2                | 0.187  | 0.004    | -0.002   | 0 | 32.18 | 20 | 125 | 5   | 269   | -1.96 |
| 1710.7 | 11 | O95297       | R.DYTGCTSESLSPVK DYTGC[160.0307]STSESLS[166.9984] 2  | 0.005  | 0.005    | -0.004   | 0 | 30.36 | 20 | 125 | 5   | 269   | -2.35 |
| 1710.7 | 7  | O95297       | R.DYTGCTSESLSPVK DYTGC[160.0307]STSESLS[166.9984] 2  | 0.893  | 6.90E-04 | -0.004   | 0 | 39.22 | 20 | 132 | 7   | 269   | -2.24 |
| 3282.4 | 20 | O95359       | K.MQESPKLQQSYN MQES[166.9984]PKLQQSYNFF 3            | 0.384  | 0.02     | -0.008   | 1 | 35.44 | 21 | 58  | 6   | 2948  | -2.56 |
| 2710.1 | 12 | O95359       | R.MSESPCTSGSFEI MSE[166.9984]PTPC[160.0307] 3        | 1.504  | 0.002    | -0.007   | 0 | 25.24 | 20 | 58  | 6   | 2948  | -2.53 |
| 2460.1 | 18 | O95359       | K.LDNTASPSPRAE LNDTPAS[166.9984]PPRS[166.9984] 3     | 0.956  | 0.005    | -0.005   | 1 | 30.96 | 20 | 58  | 6   | 2948  | -2.16 |
| 2710.2 | 20 | O95359       | R.MSESPCTSGSFEI MSE[166.9984]PTPC[160.0307] 3        | 0.768  | 0.009    | -0.007   | 0 | 28.08 | 20 | 58  | 6   | 2948  | -2.53 |
| 2460.1 | 12 | O95359       | K.LDNTASPSPRAE LNDTPAS[181.014]PASPPRS[166.9984] 3   | -0.341 | 0.011    | -0.004   | 1 | 27.88 | 21 | 84  | 5   | 2948  | -1.75 |
| 2158.7 | 7  | O95361       | R.EETEQDSDSAEQE ETEEQDS[166.9984]DSAEQDGF 2          | 1.83   | 7.30E-05 | -0.003   | 0 | 46.66 | 18 | 47  | 2   | 47    | -2.42 |
| 2410.2 | 24 | O95365       | R.GGAPDPSGATAT GGAPDPSGATATPGAAPQPS[166.9984] 3      | 2.732  | 7.20E-06 | -0.009   | 0 | 59.63 | 21 | 60  | 1   | 584   | -3.93 |
| 3109.2 | 33 | O95391       | K.DHNSEDEDEKDAL DHNS[166.9984]DEDEDEKDAL 3           | 1.668  | 1.10E-04 | -0.01    | 1 | 43.99 | 17 | 44  | 2   | 586   | -3.26 |
| 2016.7 | 13 | O95400       | K.HSLDSEDEEDDD HSLDS[166.9984]DEDEEDDDG 3            | 0.916  | 0.006    | -0.004   | 0 | 25.56 | 16 | 75  | 4   | 341   | -2.03 |
| 1474.7 | 8  | O95400       | K.GPGQPSRQLDR.GPGQPS[166.9984]RQLDR 2                | -0.586 | 0.022    | -0.003   | 1 | 25.5  | 21 | 92  | 3   | 341   | -2.05 |
| 1474.7 | 7  | O95400       | K.GPGQPSRQLDR.GPGQPS[166.9984]RQLDR 2                | 0.524  | 0.002    | -0.003   | 1 | 36.5  | 21 | 105 | 3   | 341   | -2.05 |
| 2016.7 | 10 | O95400       | K.HSLDSEDEEDDD HSLDS[166.9984]DEDEEDDDG 3            | 1.374  | 0.002    | -0.004   | 0 | 30.47 | 16 | 105 | 4   | 341   | -2.03 |
| 1429.6 | 8  | O95425       | R.DSSFTVPRSPK.H DSSFTVPR[166.9984]PK 2               | 0.876  | 7.50E-04 | -0.004   | 1 | 39.12 | 20 | 39  | 10  | 2214  | -2.51 |
| 1925.8 | 9  | O95425       | K.YGSFEEAASYPLN YGS[166.9984]FEEAASYPLNR 2           | 0.91   | 6.40E-04 | -0.003   | 0 | 40.39 | 21 | 44  | 10  | 2214  | -1.58 |
| 1143.5 | 6  | O95425       | K.SFDEQNVPK.R S[166.9984]FDEQNVPK 2                  | -0.756 | 0.028    | -0.002   | 0 | 22.75 | 20 | 90  | 9   | 2214  | -1.91 |
| 1196.6 | 6  | O95453       | K.KELSPAGSISK.N KELS[166.9984]PAGSISK 2              | -0.365 | 0.011    | -0.002   | 1 | 26.66 | 20 | 34  | 2   | 639   | -2.15 |
| 1302.6 | 8  | O95453       | R.NNSFTAPSTVGK.R NNS[166.9984]FTAPSTVGK 2            | 0.222  | 0.003    | -0.004   | 0 | 33.48 | 21 | 49  | 2   | 639   | -2.74 |
| 1370.5 | 5  | O95490       | R.GNSDGVYIPIK.E GNS[166.9984]DGVYIPIK 2              | 0.573  | 0.001    | -0.002   | 0 | 37.04 | 21 | 37  | 3   | 1459  | -1.27 |
| 2667   | 15 | O95633       | R.HAGSCAGTEPEPP HAGSC[160.0307]AGTEPEPPGG 3          | 0.147  | 0.04     | -0.006   | 0 | 19.81 | 21 | 1   | 263 | -2.15 |       |
| 2128.9 | 19 | O95674       | R.VAHEPVAPPEKES VAHEPVAPPEKES[166.9984]E 3           | 1.426  | 0.002    | -0.004   | 1 | 35.66 | 21 | 111 | 7   | 445   | -2.11 |
| 3294.5 | 30 | O95674       | K.VDGETASDESRAE VDGETASDESRAES[166.9984] 4           | 1.509  | 7.00E-04 | -0.006   | 1 | 39.21 | 20 | 111 | 7   | 445   | -1.71 |
| 3294.5 | 26 | O95674       | K.VDGETASDESRAE VDGETAS[166.9984]DESRAES 3           | 1.41   | 2.80E-06 | -0.006   | 1 | 63.1  | 20 | 111 | 7   | 445   | -1.86 |
| 2092.8 | 6  | O95674       | K.ESEEAQVDEGAS ESEEAQVDEGAS[166.9984]D 2             | -0.159 | 0.007    | -0.003   | 1 | 28.77 | 20 | 111 | 7   | 445   | -1.62 |
| 3294.5 | 24 | O95674       | K.VDGETASDESRAE VDGETASDES[166.9984]RAES 3           | 1.472  | 2.10E-05 | -0.006   | 1 | 54.36 | 20 | 99  | 3   | 445   | -1.86 |
| 3294.5 | 15 | O95674       | K.VDGETASDESRAE VDGETAS[166.9984]ESRAES 4            | 0.191  | 3.70E-05 | -0.006   | 1 | 51.94 | 20 | 114 | 5   | 445   | -1.71 |
| 2536.1 | 13 | O95684       | K.GPTTGEGALDSV GPTTGEGALDSVHS[166.9984] 3            | 1.41   | 1.40E-04 | -0.006   | 1 | 45.5  | 19 | 46  | 3   | 399   | -2.26 |
| 1544.6 | 9  | O95696       | R.VHGEPTSDLSLD.V HGEPT[166.9984]DLS[166.9984] 3      | 0.296  | 0.002    | -0.003   | 0 | 32.22 | 19 | 32  | 1   | 1058  | -1.78 |
| 3055.3 | 33 | O95714       | K.LAELPAAQPSAED LAELPAAQPSAEDS[166.9984] 3           | 2.231  | 3.00E-04 | -0.005   | 0 | 42.71 | 20 | 47  | 8   | 4834  | -1.73 |
| 2928.3 | 13 | O95714       | R.IRAEEDLAAVPLA IRAEEDLAAVPLAS[166.9984] 3           | 1.57   | 0.001    | -0.006   | 1 | 37.06 | 21 | 56  | 10  | 4834  | -2.06 |
| 3055.3 | 21 | O95714       | K.LAELPAAQPSAED LAELPAAQPSAEDS[181.014] 3            | 1.668  | 6.10E-04 | -0.005   | 0 | 39.56 | 20 | 56  | 10  | 4834  | -1.73 |
| 3135.2 | 27 | O95714       | K.LAELPAAQPSAED LAELPAAQPSAEDS[166.9984] 3           | 1.544  | 4.30E-04 | -0.007   | 0 | 40.7  | 20 | 88  | 11  | 4834  | -2.37 |
| 3055.3 | 22 | O95714       | K.LAELPAAQPSAED LAELPAAQPSAEDS[166.9984] 3           | 1.462  | 0.002    | -0.005   | 0 | 35.05 | 20 | 88  | 9   | 4834  | -1.73 |
| 2135.2 | 20 | O95714       | K.LAELPAAQPSAED LAELPAAQPSAEDS[181.014] 3            | 1.655  | 4.00E-04 | -0.007   | 0 | 41.09 | 20 | 100 | 9   | 4834  | -2.37 |
| 3732.2 | 12 | O95714,Q9BV  | K.IGNEESDLEAACLP IIGNEES[166.9984]DLEAAC[160.0307] 3 | 0.126  | 0.038    | -0.003   | 0 | 22.66 | 21 | 68  | 8   | 934   | -0.94 |
| 2659.2 | 14 | O95714,Q9BV  | K.IGNEESDLEAACLP IIGNEES[166.9984]DLEAAC[160.0307] 3 | 0.691  | 0.01     | -0.006   | 0 | 29.26 | 22 | 100 | 20  | 1077  | -2.09 |
| 2555.9 | 11 | O95747       | K.TEDGGWEWSDDEI TEDGGWEWS[166.9984]DDEFI 2           | 4.735  | 9.40E-05 | -0.004   | 0 | 43.61 | 16 | 44  | 1   | 527   | -1.77 |
| 3045.3 | 7  | O95772       | R.AAUPGGLSDGQFY AAUPGGLSDGQFYPPSEAGS[166.9984] 3     | 0.554  | 0.015    | -0.005   | 0 | 26.94 | 21 | 27  | 3   | 234   | -1.81 |
| 3125.3 | 13 | O95772       | R.AAUPGGLSDGQFY AAUPGGLSDGQFYPPSEAGS[166.9984] 3     | 0.401  | 0.019    | -0.006   | 0 | 25.44 | 21 | 24  | 2   | 234   | -2    |
| 1624.8 | 7  | O95785       | K.SPOLSLSPRASPK.SPOLSL[166.9984]PPRAS[166.9984] 3    | -0.002 | 0.005    | -0.004   | 1 | 31.34 | 21 | 31  | 3   | 1651  | -2.17 |
| 2542   | 11 | O95793       | K.VTFPEPQSDENG VTFPEPQSDENG[166.9984]DENGTS 3        | 0.346  | 0.025    | -0.005   | 1 | 22.79 | 21 | 2   | 577 | -2.04 |       |
| 1610.7 | 16 | O95831       | K.AALSASEGEEVQD AALSAS[166.9984]GEEVQDQ 2            | -0.733 | 0.027    | 6.00E-06 | 0 | 23.03 | 20 | 23  | 3   | 613   | -0.37 |
| 1483.7 | 9  | O95831       | K.DGEGHEDLNEVAK.DGEGHEDLNEVAK 2                      | 1.231  | 3.20E-04 | -0.004   | 0 | 42.53 | 20 | 43  | 2   | 613   | -0.33 |
| 1425.6 | 7  | P00367,P4944 | R.DDGSWEVEGYR.A DDGSWEVEGYR 2                        | 1.739  | 9.50E-05 | -0.002   | 0 | 48.75 | 21 | 49  | 5   | 1130  | -1.59 |
| 2194   | 11 | P00519       | K.GQGESDPLDHEPA GQGESDPLDHEPAVS[166.9984] 3          | 0.063  | 0.048    | -0.004   | 0 | 21.99 | 21 | 22  | 5   | 1210  | -1.2  |
| 2316   | 14 | P00533       | K.GSHQSLDNPYQC GSHQSL[166.9984]LDNPYQC 3             | 1.025  | 0.004    | -0.003   | 0 |       |    |     |     |       |       |

|        |    |              |                                               |   |        |          |           |   |       |    |     |    |      |       |
|--------|----|--------------|-----------------------------------------------|---|--------|----------|-----------|---|-------|----|-----|----|------|-------|
| 2613.1 | 11 | P05114       | K.EDLPAENGETKTEE! EDLPAENGETKTEE[166.9984]P   | 3 | 0.806  | 0.008    | -0.007    | 1 | 28.41 | 20 | 54  | 3  | 100  | -2.56 |
| 2029.7 | 17 | P05386,P0538 | K.KEESEESDDMMGFC KEES[166.9984]EESDDMMGFL     | 2 | 1.978  | 1.30E-05 | -0.001    | 1 | 53.45 | 17 | 61  |    |      | -0.66 |
| 2029.7 | 12 | P05386,P0538 | K.KEESEESDDMMGFC KEES[166.9984]EES[166.9984]J | 2 | -0.259 | 0.009    | -0.003    | 1 | 23.77 | 16 | 61  |    |      | -1.45 |
| 2029.7 | 18 | P05386,P0538 | K.KEESEESDDMMGFC KEES[166.9984]DDMMGFL        | 2 | 1.985  | 5.50E-05 | -0.001    | 1 | 47.31 | 17 | 66  |    |      | -0.66 |
| 1949.8 | 9  | P05386,P0538 | K.KEESEESDDMMGFC KEES[166.9984]DDMMGFLD       | 2 | 0.587  | 0.001    | -0.003    | 1 | 35.26 | 19 | 73  |    |      | -1.75 |
| 3003.3 | 21 | P05412       | K.EEPQTVPEMGETF EEPQTVPEMGETPPLS[166.998      | 3 | 0.559  | 0.014    | -0.007    | 0 | 26.94 | 21 | 27  | 1  | 331  | -2.39 |
| 1551.8 | 9  | P05412       | K.NSDLLTSPDVGLLK.NSDLLTSPDVGLLK               | 2 | 1.601  | 1.20E-04 | -0.002    | 0 | 47.34 | 21 | 62  |    |      | -1.4  |
| 1095.5 | 6  | P05556       | K.SAVTTVVPNK.Y [166.9984]AVTTVVPNK            | 2 | 0.986  | 5.00E-04 | -0.002    | 0 | 40.17 | 20 | 40  | 2  | 798  | -2.25 |
| 2740.3 | 19 | P05783       | R.LEDGEDFNLGDAL LLEDGEDFNLGDALDSSNSMQTI       | 3 | 2.572  | 9.30E-05 | -0.005    | 0 | 49.06 | 21 | 216 | 8  | 430  | -1.74 |
| 2820.2 | 21 | P05783       | R.LEDGEDFNLGDAL LLEDGEDFNLGDALDSS[166.9984    | 3 | 2.572  | 2.30E-05 | -0.003    | 0 | 54.88 | 21 | 216 | 8  | 430  | -1.1  |
| 1372.6 | 8  | P05783       | R.SLGSVQAPSYGAR.I SLGS[166.9984]VQAPSYGAR     | 2 | 0.552  | 0.002    | -0.003    | 0 | 35.88 | 20 | 216 | 8  | 430  | -1.86 |
| 1055.4 | 6  | P05783       | R.STFTNYSR.S [181.014]JSTFTNYSR               | 2 | -0.226 | 0.009    | -0.003    | 0 | 26.1  | 18 | 216 | 8  | 430  | -2.42 |
| 2820.2 | 18 | P05783       | R.LEDGEDFNLGDAL LLEDGEDFNLGDALDSS[166.998     | 3 | 2.572  | 2.10E-06 | -0.004    | 0 | 65.3  | 21 | 216 | 8  | 430  | -1.53 |
| 1372.6 | 14 | P05783       | R.SLGSVQAPSYGAR.I [166.9984]JSLGSVQAPSYGAR    | 2 | 0.866  | 7.70E-04 | -0.003    | 0 | 38.99 | 20 | 151 | 12 | 430  | -1.86 |
| 1012.5 | 6  | P05783       | K.YETELAMR.Q YETELAMR                         | 2 | -0.636 | 0.021    | -0.002    | 0 | 24.9  | 21 | 397 | 17 | 430  | -2.15 |
| 1419.7 | 8  | P05783       | R.QAQYEALLNIK.V QAQYEALLNIK                   | 2 | 1.148  | 3.70E-04 | -0.003    | 0 | 41.74 | 20 | 397 | 17 | 430  | -2.3  |
| 2820.2 | 26 | P05783       | R.LEDGEDFNLGDAL LLEDGEDFNLGDALDSSNS[166.9     | 3 | 2.701  | 2.40E-06 | -0.004    | 0 | 64.77 | 21 | 397 | 17 | 430  | -1.53 |
| 1055.4 | 6  | P05783       | R.STFTNYSR.S [166.9984]JSTFTNYSR              | 1 | 3.02   | 5.30E-06 | -0.003    | 0 | 58.2  | 18 | 151 | 12 | 430  | -2.42 |
| 1055.4 | 4  | P05783       | R.STFTNYSR.S STFS[166.9984]JSTFTNYSR          | 2 | -0.274 | 0.01     | -0.003    | 0 | 25.62 | 18 | 235 | 11 | 430  | -2.52 |
| 1183.5 | 7  | P05783       | R.VRSLETENR.R VRS[166.9984]JLETENR            | 2 | -0.52  | 0.018    | -0.002    | 1 | 26.16 | 21 | 216 | 8  | 430  | -1.49 |
| 1065.6 | 10 | P05783       | K.LEAEIATYR.R LEAEIATYR                       | 2 | 1.025  | 5.30E-04 | -0.002    | 0 | 40.61 | 20 | 216 | 8  | 430  | -1.47 |
| 1046.5 | 7  | P05783       | K.VIDDTNITR.L VIDDTNITR                       | 2 | -1.001 | 0.049    | -0.001    | 0 | 21.25 | 21 | 397 | 17 | 430  | -1.31 |
| 1660.7 | 14 | P05783       | R.PVSSAAVYAGAGC.PVSSAA[166.9984]JYAGAGGS      | 2 | 2.085  | 3.80E-08 | -0.006    | 0 | 82.14 | 20 | 397 | 17 | 430  | -3.4  |
| 1372.6 | 9  | P05783       | R.SLGSVQAPSYGAR.I SLGSVQAP[166.9984]JYAG      | 2 | -0.249 | 0.01     | -0.002    | 0 | 27.84 | 20 | 151 | 12 | 430  | -1.57 |
| 1586.7 | 6  | P05783       | R.TVQSLDLDMSR.I TVQS[166.9984]LELDLDSMR       | 2 | 0.343  | 0.003    | -7.00E-04 | 0 | 32.72 | 19 | 249 | 10 | 430  | -0.47 |
| 807.4  | 6  | P05783,O760  | R.LAADDFR.L LAADDFR                           | 2 | 0.317  | 0.002    | -0.002    | 0 | 33.39 | 20 | 144 |    |      | -2.15 |
| 1093.5 | 8  | P05783,Q927  | K.ETMQSLNDR.L ETMQSLNDR                       | 2 | 1.315  | 2.60E-04 | -0.002    | 0 | 43.51 | 20 | 216 |    |      | -2.13 |
| 1555.7 | 8  | P05787       | R.LESGMQNMSHTK.LESGMQNMS[166.9984]JHTK        | 2 | 1.547  | 1.60E-04 | -0.003    | 0 | 44.83 | 19 | 344 | 26 | 483  | -2    |
| 1253.6 | 8  | P05787       | K.LVSESSDVLPK.- LVS[166.9984]JSSDVLPK         | 2 | 1.36   | 2.20E-04 | -0.002    | 0 | 45.96 | 22 | 344 | 26 | 483  | -1.56 |
| 1352.7 | 8  | P05787       | R.TEMENEFVLK.K TEMENEFVLK                     | 2 | 0.396  | 0.002    | -0.002    | 0 | 35.32 | 21 | 344 | 26 | 483  | -1.63 |
| 950.4  | 6  | P05787       | R.ISSSSFSR.V ISSS[166.9984]JFSR               | 2 | 0.34   | 0.002    | -0.002    | 0 | 33.76 | 20 | 344 | 26 | 483  | -2.09 |
| 1400.6 | 9  | P05787       | R.SLDMDSIAEVK.A SLDMDS[166.9984]JIAEVK        | 2 | 1.978  | 1.20E-05 | -0.001    | 0 | 57.11 | 21 | 344 | 26 | 483  | -0.82 |
| 1217.5 | 8  | P05787       | K.YEELQSLAGH.K YEELQSL[166.9984]JLAGH         | 2 | -0.332 | 0.011    | -0.002    | 0 | 27.04 | 20 | 344 | 26 | 483  | -1.66 |
| 1084.5 | 6  | P05787       | K.DVDEAYMKN.V DVDEAYMKN                       | 2 | 0.78   | 8.90E-04 | -0.002    | 0 | 38.16 | 20 | 344 | 26 | 483  | -1.87 |
| 1400.6 | 9  | P05787       | R.SLDMDSIAEVK.A [166.9984]JLDMDSIAEVK         | 2 | 0.589  | 0.001    | -0.001    | 0 | 37.25 | 21 | 344 | 26 | 483  | -0.96 |
| 1253.6 | 12 | P05787       | K.LVSESSDVLPK.- LVSESS[166.9984]JVLPK         | 2 | 0.061  | 0.004    | -0.002    | 0 | 32.97 | 22 | 344 | 26 | 483  | -1.72 |
| 1137.6 | 14 | P05787       | K.YEELQSLAGH.K YEELQSLAGH                     | 2 | 1.818  | 7.30E-05 | -0.002    | 0 | 49.54 | 21 | 344 | 26 | 483  | -1.93 |
| 1045.5 | 5  | P05787       | R.QLETLGQEK.L QLETLGQEK                       | 2 | -0.666 | 0.026    | -0.002    | 0 | 23.7  | 20 | 344 | 26 | 483  | -2.2  |
| 950.4  | 7  | P05787       | R.ISSSSFSR.V IS[166.9984]JSSFSR               | 2 | -0.391 | 0.013    | -0.002    | 0 | 26.45 | 20 | 344 | 26 | 483  | -2.2  |
| 1344.7 | 8  | P05787       | R.ASLAAIAADAEQR.C ASLAAIAADAEQR               | 2 | 2.161  | 3.20E-05 | -0.002    | 0 | 52.97 | 21 | 344 | 26 | 483  | -1.37 |
| 1000.6 | 9  | P05787       | R.LQAEIEGLK.G LQAEIEGLK                       | 2 | -0.555 | 0.018    | -0.002    | 0 | 23.76 | 19 | 487 | 31 | 483  | -1.7  |
| 846.35 | 5  | P05787       | R.VGSSNFR.G VGS[166.9984]JNFR                 | 2 | -0.283 | 0.009    | -0.001    | 0 | 25.5  | 18 | 411 | 27 | 483  | -1.36 |
| 1079.5 | 6  | P05787       | R.QLYEEIE.E QLYEEIE                           | 2 | 0.344  | 0.002    | -0.002    | 0 | 34.7  | 21 | 565 | 32 | 483  | -2.06 |
| 1765.8 | 12 | P05787       | K.QORASLEAIAADE QRAS[166.9984]JLEAIAADEIQ     | 3 | 0.623  | 0.013    | -0.003    | 1 | 27.56 | 21 | 565 | 32 | 483  | -1.65 |
| 979.45 | 7  | P05787       | K.TEISEMNR.N TEISEMNR                         | 2 | -0.168 | 0.007    | -0.002    | 0 | 27.58 | 19 | 565 | 32 | 483  | -1.93 |
| 1424.6 | 14 | P05787       | R.ASLAAIAADAEQR.C AS[166.9984]JLEAIAADEQR     | 2 | 0.812  | 8.80E-04 | -0.002    | 0 | 38.45 | 20 | 411 | 27 | 483  | -1.52 |
| 950.4  | 6  | P05787       | R.ISSSSFSR.V ISS[166.9984]JSSFSR              | 2 | -0.47  | 0.016    | -0.002    | 0 | 25.56 | 20 | 565 | 32 | 483  | -2.09 |
| 1320.7 | 9  | P05787       | R.SLDMDSIAEVK.A SLDMDSIAEVK                   | 2 | 2.654  | 1.20E-05 | -8.00E-04 | 0 | 56.76 | 20 | 467 | 32 | 483  | -0.62 |
| 950.4  | 6  | P05787       | R.ISSSSFSR.V ISSS[166.9984]JFSR               | 2 | -0.76  | 0.003    | -0.002    | 0 | 22.76 | 20 | 470 | 29 | 483  | -2.3  |
| 1619.6 | 9  | P05787       | R.AFSSRSYSGPGRS.AFSS[166.9984]JRSY[243.0297]  | 3 | 0.236  | 0.028    | -0.003    | 1 | 22.29 | 20 | 565 | 32 | 483  | -1.96 |
| 1079.5 | 11 | P05787,O956  | K.AQVEDIANR.S AQVEDIANR                       | 2 | 0.684  | 9.50E-04 | -0.002    | 0 | 37.2  | 20 | 344 |    |      | -1.46 |
| 1402.6 | 7  | P05787,O956  | K.AQVEDIANR.S.R AQVEDIANR[166.9984]R          | 3 | 0.201  | 0.03     | -0.003    | 1 | 24.41 | 22 | 470 |    |      | -2.02 |
| 907.4  | 6  | P05787,O956  | K.FASFDK.V FAS[166.9984]JFDK                  | 2 | -0.405 | 0.015    | -0.001    | 0 | 26.26 | 20 | 487 |    |      | -1.1  |
| 1153.6 | 6  | P05787,O956  | K.EYQELMNVK.L EYQELMNVK                       | 2 | -0.497 | 0.017    | -0.002    | 0 | 26.39 | 21 | 344 |    |      | -1.95 |
| 1345.5 | 7  | P06493,P2494 | K.IGEGTYGVVYK.G IGE[181.014]Y[243.0297]GV     | 2 | -0.179 | 0.007    | -0.002    | 0 | 27.57 | 19 | 28  |    |      | -1.31 |
| 1265.8 | 8  | P06493,P2494 | K.IGEGTYGVVYK.G IGE[181.014]YGVVYK            | 2 | 1.398  | 1.90E-04 | -0.002    | 0 | 44.24 | 20 | 44  |    |      | -1.69 |
| 1990.9 | 12 | P06733       | K.DATNVGDEGGFAP.DATNVGDEGGFAPNILENK           | 3 | 2.179  | 3.60E-04 | -0.003    | 0 | 43.19 | 21 | 90  | 2  | 434  | -1.72 |
| 1123.5 | 5  | P06744       | R.SNTPLVDGK.D SNT[181.014]JPLVDGK             | 2 | -0.531 | 0.019    | -0.002    | 0 | 24.98 | 20 | 25  | 3  | 558  | -1.85 |
| 1011.4 | 9  | P06748       | K.GPSSVEDIK.A GPSS[166.9984]JVEDIK            | 2 | 0.557  | 0.001    | -0.002    | 0 | 35.93 | 20 | 72  | 8  | 294  | -2.4  |
| 3723.2 | 26 | P06748       | K.LAAEDDDDDDDDE.LAAEDDDDDDDDEDDDDDDDD         | 3 | 1.41   | 6.30E-06 | -0.005    | 0 | 54.02 | 15 | 72  | 8  | 294  | -1.3  |
| 3460.4 | 22 | P06748       | K.CGSGPVHISGQHLV.C [160.0307]JGSGPVHISGQHLV   | 4 | 0.046  | 0.036    | -0.005    | 0 | 21.27 | 19 | 157 | 11 | 294  | -1.41 |
| 2225   | 5  | P06748       | K.DELHIVAEAMNVE DELHIVAEAMNVEGS[166.9984      | 3 | 0.133  | 0.034    | -0.002    | 0 | 23.69 | 22 | 157 | 11 | 294  | -1.11 |
| 1568.7 | 15 | P06748       | K.VDNDEHEHQLSLR.VDNDEHEHQLSLR                 | 3 | 0.288  | 0.025    | -0.003    | 0 | 24.21 | 21 | 158 | 11 | 294  | -1.02 |
| 3460.4 | 23 | P06748       | K.CGSGPVHISGQHLV.C [160.0307]JG[166.9984]GPV  | 4 | 0.191  | 0.013    | -0.005    | 0 | 25.71 | 19 | 158 | 11 | 294  | -1.41 |
| 1051.4 | 4  | P07099       | R.YLEDGGLER.K YLEDGGLER                       | 2 | -0.617 | 0.02     | -0.004    | 0 | 24.05 | 20 | 24  | 1  | 455  | -3.95 |
| 1038.6 | 6  | P07237       | K.DHENIVIAK.M DHENIVIAK                       | 2 | -0.933 | 0.045    | -0.002    | 0 | 21.03 | 20 | 79  | 4  | 508  | -2.13 |
| 1213.5 | 6  | P07237       | K.NFEDVAFDEK.K NFEDVAFDEK                     | 2 | 1.688  | 1.00E-04 | -0.002    | 0 | 46.24 | 19 | 79  | 4  | 508  | -1.78 |
| 3757.4 | 22 | P07237       | K.FLESGQDQDGGD.FLESGQDQDGGDDDDLEEEAE          | 3 | 1.41   | 3.60E-05 | -0.005    | 0 | 50.79 | 19 | 79  | 4  | 508  | -1.25 |
| 1037.5 | 10 | P07237       | R.NNFEGETV.K NNFEGETV                         | 2 | -0.961 | 0.046    | -0.002    | 0 | 19.72 | 19 | 58  | 5  | 508  | -2.03 |
| 1787.8 | 12 | P07339       | R.DPDAQPGGELMGLG.DPDAQPGGELMGLGTTD            | 2 | 1.081  | 4.20E-04 | -0.004    | 0 | 42.17 | 21 | 42  | 3  | 412  | -2.53 |
| 1908.9 | 9  | P07355       | R.AEDGSVIDYELDQJ.AEDGSVIDYELDQJ               | 2 | 2.732  | 1.50E-06 | -0.004    | 0 | 66.5  | 21 | 131 | 6  | 339  | -2.27 |
| 1096.5 | 6  | P07355,A6NM  | K.ALLYLCGGDD.- ALLYLC[160.0307]JGGDD          | 2 | 1.978  | 9.50E-06 | -0.001    | 0 | 56.54 | 19 | 131 |    |      | -1.31 |
| 1924.9 | 10 | P07355,A6NM  | K.LSLEGDHSTPPSAYC.LSLEGDHSTPPSAYGS[166.9984]  | 2 | -0.618 | 0.02     | -0.005    | 0 | 26.18 | 22 | 131 |    |      | -2.44 |
| 1244.6 | 7  | P07355,A6NM  | R.TNQLQEINR.V TNQLQEINR                       | 2 | 0.998  | 5.50E-04 | -0.002    | 0 | 40.34 | 20 | 131 |    |      | -1.71 |
| 1353.7 | 5  | P07355,A6NM  | K.DHISDTSDFR.K DHISDTSDFR                     | 2 | -0.644 | 0.023    | -0.002    | 1 | 24.87 | 21 | 197 |    |      | -1.62 |
| 1857.8 | 8  | P07355,A6NM  | K.GLGTDESDIIEICF.GLGTDESDI[166.9984]JIEIC[16  | 2 | -0.055 | 0.006    | -0.001    | 0 | 30.76 | 21 | 197 |    |      | -0.63 |
| 1924.9 | 16 | P07355,A6NM  | K.LSLEGDHSTPPSAYC.LSLEGDHSTPPSAYGS[166.9984]  | 2 | -0.992 | 0.049    | -0.005    | 0 | 22.3  | 22 | 119 |    |      | -2.44 |
| 1225.9 | 6  | P07355,A6NM  | K.DHISDTSDFR.K DHISDTSDFR                     | 2 | -0.235 | 0.009    | -0.002    | 0 | 28.87 | 21 | 119 |    |      | -2.07 |
| 2125.9 | 6  | P07814       | K.EYIPGQPPLSQSSD.EYIPGQPPLSQSSDSS[166.9984]   | 2 | -0.366 | 0.012    | -0.005    | 0 | 27.7  | 21 | 63  | 10 | 1512 | -2.38 |
| 2205.9 | 13 | P07814       | K.EYIPGQPPLSQSSD.EYIPGQPPLSQSS[166.9984]DSS   | 2 | -0.9   | 0.043    | -0.006    | 0 | 21.26 | 20 | 65  | 7  | 1512 | -2.67 |
| 3449.6 | 19 | P07814       | K.EYIPGQPPLSQSSD.EYIPGQPPLSQSSDSSPT181.01     | 3 | 0.618  | 0.012    | -0.007    | 1 | 26.51 | 20 | 65  | 7  | 1512 | -2.11 |
| 3529.5 | 22 | P07814       | K.EYIPGQPPLSQSSD.EYIPGQPPLS[166.9984]QS[166   | 3 | 0.648  | 0.012    | -0.005    | 1 | 26.81 | 20 | 65  | 7  | 1512 | -1.39 |
| 2205.9 | 10 | P07814       | K.EYIPGQPPLSQSSD.EYIPGQPPLSQSSDSS[166.9984]   | 2 | -0.851 | 0.038    | -0.006    | 0 | 21.82 | 20 | 48  | 8  | 1512 | -2.67 |

|         |    |              |                                                   |   |        |          |           |   |       |    |     |    |      |       |
|---------|----|--------------|---------------------------------------------------|---|--------|----------|-----------|---|-------|----|-----|----|------|-------|
| 1600.7  | 7  | P08621       | R.YDERPGSPPLHR.L YDERPGSP[166.9984]PLPHR          | 3 | 1.41   | 2.60E-04 | -0.003    | 1 | 44    | 21 | 52  | 2  | 437  | -1.97 |
| 3980.6  | 29 | P08621       | K.EELRGGGGDMAEP EELRGGGGDMAEPS[166.9984]I         | 3 | 1.668  | 4.70E-04 | -4.00E-04 | 1 | 40.47 | 20 | 87  | 5  | 437  | -0.1  |
| 2062.9  | 12 | P08648       | R.LESSLSSSEGEPEV LLESSLSS[166.9984]SEGEPEV        | 2 | 2.847  | 1.60E-06 | -0.005    | 0 | 59.76 | 21 | 60  | 1  | 1049 | -2.35 |
| 1495.6  | 9  | P08651       | K.SPFNSPSPQDSR.L SPFNPS[166.9984]PQDSR            | 2 | 0.159  | 0.004    | -0.001    | 0 | 31.95 | 20 | 32  | 1  | 508  | -0.74 |
| 1495.6  | 10 | P08651       | K.SPFNSPSPQDSR.L SPFNPS[166.9984]PR               | 2 | -0.239 | 0.009    | -0.006    | 0 | 26.9  | 19 | 51  | 2  | 508  | -4.02 |
| 1836.5  | 5  | P08670       | R.DGQVNETSQHHD DGQVNETSQHHDLE                     | 2 | -0.936 | 0.044    | -0.005    | 0 | 22    | 21 | 82  | 14 | 466  | -2.55 |
| 1323.6  | 6  | P08670       | R.EEAENTLQSF.R Q EEAENTLQSF.R                     | 2 | 0.308  | 0.002    | -0.002    | 0 | 34.44 | 21 | 82  | 14 | 466  | -1.74 |
| 1508.7  | 9  | P08670       | R.SLYASSPGVYATR.S SLYASS[166.9984]PGVYATR         | 2 | -0.173 | 0.008    | -0.003    | 0 | 28.63 | 20 | 82  | 14 | 466  | -2.11 |
| 1916.8  | 13 | P08670       | R.DGQVNETSQHHD DGQVNETSQHHD                       | 2 | 0.602  | 0.001    | -0.005    | 0 | 36.35 | 20 | 83  | 16 | 466  | -2.67 |
| 1570.7  | 9  | P08670       | R.QVQSLTCEVDALK.I QVQS[166.9984]LTC[160.0307      | 2 | 2.241  | 2.70E-05 | -0.003    | 0 | 53.27 | 20 | 140 | 15 | 466  | -1.75 |
| 1186.6  | 8  | P08729       | K.QEELEAALQR.Q QEELEAALQR                         | 2 | 1.513  | 1.60E-04 | -0.002    | 0 | 45.49 | 20 | 90  | 3  | 469  | -1.77 |
| 1197.5  | 8  | P08729       | R.SMQDQVVEDFK.N SMQDQVVEDFK                       | 2 | 2.269  | 2.60E-05 | -0.002    | 0 | 54.05 | 21 | 90  | 3  | 469  | -1.52 |
| 1014.5  | 7  | P08729       | R.LDADPSLQR.V LDADPSLQR                           | 2 | -0.197 | 0.008    | -0.002    | 0 | 26.39 | 18 | 90  | 3  | 469  | -2.5  |
| 992.45  | 6  | P08729       | R.NEISEMNR.A NEISEMNR                             | 2 | -0.438 | 0.014    | -0.002    | 0 | 24.93 | 19 | 104 | 5  | 469  | -1.75 |
| 1242.6  | 10 | P08729       | R.GQLEALQVDGGR.L GQLEALQVDGGR                     | 2 | 2.241  | 4.20E-06 | -0.002    | 0 | 60.6  | 19 | 154 | 5  | 469  | -1.68 |
| 1138.5  | 5  | P09496       | R.LQSEPIR.K LQS[166.9984]EPESIR                   | 2 | -0.953 | 0.044    | -0.002    | 0 | 18.83 | 18 | 19  | 1  | 248  | -1.72 |
| 1366.6  | 8  | P09525       | R.QDAQDLYEAGE.K QDAQDLYEAGEK                      | 2 | -0.351 | 0.012    | -0.003    | 0 | 26.85 | 20 | 27  | 2  | 219  | -2.41 |
| 1263.6  | 10 | P09601       | K.DQSPSRAPGLR.Q DQS[166.9984]PSRAPGLR             | 2 | -0.508 | 0.017    | -0.002    | 1 | 36.18 | 21 | 39  | 2  | 288  | -1.68 |
| 1774.7  | 11 | P09651       | R.NQGGYGGSSSSSS.Y NQGGYGGSSSSSS[166.9984]YG       | 2 | 0.51   | 0.002    | -0.004    | 0 | 23.46 | 18 | 194 | 11 | 372  | -1.99 |
| 1774.7  | 11 | P09651       | R.NQGGYGGSSSSSS.Y NQGGYGGSSSSSS[166.9984]YV       | 2 | 1.423  | 2.10E-04 | -0.004    | 0 | 42.59 | 18 | 194 | 11 | 372  | -2.1  |
| 1694.7  | 11 | P09651       | R.NQGGYGGSSSSSS.Y NQGGYGGSSSSSS[166.9984]YR       | 2 | 2.732  | 7.60E-09 | -0.003    | 0 | 88.56 | 20 | 194 | 11 | 372  | -1.65 |
| 1774.7  | 10 | P09651       | R.NQGGYGGSSSSSS.Y NQGGYGGSSSSSS[166.9984]YS       | 2 | 1.292  | 2.90E-04 | -0.003    | 0 | 41.28 | 18 | 194 | 11 | 372  | -1.82 |
| 1379.6  | 8  | P09651       | K.SESPKEPEQLR.K SES[166.9984]PKEPEQLR             | 2 | 0.014  | 0.005    | -0.003    | 1 | 31.47 | 21 | 85  | 6  | 372  | -2.04 |
| 1774.7  | 11 | P09651       | R.NQGGYGGSSSSSS.Y NQGGYGGSSSSSS[166.9984]YS       | 2 | 1.621  | 1.40E-04 | -0.003    | 0 | 44.54 | 18 | 85  | 6  | 372  | -1.82 |
| 1165.9  | 9  | P09651_P2262 | K.EDTEEHLR.D EDTEEHLR                             | 3 | 0.212  | 0.029    | -0.002    | 0 | 22.47 | 20 | 142 | 2  | 142  | -1.99 |
| 1049.5  | 4  | P09651_Q32P1 | R.DYFEQYK.I DYFEQYK                               | 2 | -0.225 | 0.009    | -0.002    | 0 | 26.11 | 18 | 194 | 3  | 142  | -1.76 |
| 2489.2  | 10 | PC0W22_P087  | R.DNYPVPSALDQEI.DNYPVPSALDQEI                     | 2 | 2.76   | 3.00E-06 | -0.004    | 0 | 62.64 | 20 | 63  | 2  | 193  | -1.43 |
| 3316.2  | 7  | POD193       | R.ELVGDTSQEGDHI.ELVGDTSQEGDHI                     | 3 | 0.756  | 0.009    | -0.009    | 0 | 26.96 | 19 | 27  | 3  | 91   | -2.61 |
| 3316.2  | 22 | POD193       | R.ELVGDTSQEGDHI.ELVGDTSQEGDHI                     | 3 | 1.472  | 1.70E-05 | -0.009    | 0 | 53.99 | 19 | 54  | 1  | 91   | -2.61 |
| 1549.7  | 17 | P10075       | R.SPGSQAPDEGAGG.S[166.9984]PGSQAPDEGAGGA          | 2 | -0.599 | 0.021    | -0.004    | 0 | 24.32 | 20 | 24  | 2  | 376  | -2.79 |
| 1984    | 9  | P10412       | M.SETAPAAPAAPAP.S[166.9984]SETAPAAPAPAKET[181.014 | 2 | 1.376  | 2.10E-04 | -0.005    | 1 | 44.12 | 20 | 81  | 4  | 219  | -2.9  |
| 1107.6  | 9  | P10412_P164C | K.ALAAGYDVEK.N ALAAGYDVEK                         | 2 | 0.641  | 0.001    | -0.002    | 0 | 37.77 | 21 | 81  | 3  | 219  | -2.2  |
| 1934.9  | 12 | P10451       | K.AIPVAQDLNAPSDV.AIPVAQDLNAPSDV                   | 2 | 2.732  | 6.20E-06 | -0.004    | 0 | 60.54 | 21 | 76  | 3  | 314  | -1.8  |
| 1467.6  | 13 | P10451       | R.ISHELDSASSEVN.-I ISHELDSAS[166.9984]SEVN        | 2 | 0.387  | 0.002    | -0.002    | 0 | 33.23 | 19 | 76  | 3  | 314  | -1.62 |
| 1850.15 | 15 | P10451       | K.FRISHELDSASSEVN.FRIS[166.9984]HELDSAS[166.9     | 2 | -0.887 | 0.039    | -0.004    | 1 | 20.44 | 19 | 59  | 4  | 314  | -2.4  |
| 1850.13 | 13 | P10451       | K.FRISHELDSASSEVN.FRIS[166.9984]HELDSAS[166.998   | 2 | -0.562 | 0.019    | -0.004    | 1 | 23.64 | 19 | 78  | 5  | 314  | -2.4  |
| 1467.6  | 9  | P10451       | R.ISHELDSASSEVN.-I ISHELDSAS[166.9984]ASSEVN      | 2 | -0.637 | 0.022    | -0.002    | 0 | 22.92 | 19 | 34  | 3  | 314  | -1.22 |
| 3048.4  | 11 | P10451       | K.QNLLAPQNAVSS.EE QNLLAPQNAV[166.9984]SEET        | 3 | 0.427  | 0.018    | -0.007    | 1 | 25.67 | 21 | 79  | 4  | 314  | -2.24 |
| 3831.5  | 14 | P10588       | R.AAEDDSASPPGAAS.AAEDDSAS[166.9984]PPGAAS[3       | 3 | 1.41   | 3.40E-05 | -0.011    | 1 | 51.09 | 19 | 51  | 3  | 404  | -2.84 |
| 3751.17 | 17 | P10588       | R.AAEDDSASPPGAAS.AAEDDSAS[166.9984]PPGAAS[3       | 3 | 1.544  | 1.80E-06 | 9.00E-04  | 1 | 64.19 | 19 | 61  | 3  | 404  | 0.23  |
| 3751.5  | 28 | P10588       | R.AAEDDSASPPGAAS.AAEDDSAS[166.9984]PPGAAS[3       | 3 | 1.394  | 2.50E-04 | 9.00E-04  | 1 | 42.66 | 19 | 69  | 2  | 404  | 0.23  |
| 2057    | 17 | P10644       | R.TSDREDEISPPPPV.TSDREDEIS[166.9984]PPPPV         | 2 | 0.155  | 0.004    | -0.005    | 1 | 32.86 | 21 | 38  | 2  | 381  | -2.47 |
| 2578.1  | 6  | P11166       | R.OGGASQDKTPEEL.OGGASQ[166.9984]QDKTPEEL          | 2 | -0.766 | 0.034    | -0.003    | 1 | 23.65 | 21 | 24  | 2  | 492  | -1.25 |
| 2578.1  | 6  | P11166       | R.OGGASQDKTPEEL.OGGASQ[166.9984]DKTPEEL           | 2 | -0.75  | 0.033    | -0.003    | 1 | 23.79 | 21 | 24  | 4  | 492  | -1.25 |
| 1500.9  | 9  | P11169       | K.DGVMMENSIPEAK.DGVMMENSI[166.9984]PEAK           | 2 | 0.218  | 0.003    | -0.002    | 0 | 32.54 | 20 | 33  | 1  | 492  | -1.32 |
| 2772.2  | 12 | P11387       | K.ENGFSPPQKDEP.ENGFS[166.9984]PQKDEPEI            | 3 | 0.07   | 0.043    | 1.00E-04  | 1 | 23.03 | 21 | 22  | 1  | 765  | 0.02  |
| 1742.6  | 8  | P11388       | K.VPDEEENESDNEK.VPDEEENES[166.9984]DNEK           | 2 | 1.978  | 1.20E-05 | -0.002    | 0 | 53.65 | 17 | 326 | 16 | 1531 | -1.03 |
| 1124.9  | 11 | P11388       | K.NENTEGSPQEDVJ.NENTEGS[166.9984]QEDGVEL          | 3 | 2.572  | 2.50E-06 | -0.004    | 0 | 64.33 | 21 | 326 | 16 | 1531 | -1.67 |
| 2229.9  | 10 | P11388       | K.VPDEEENESDNEK.VPDEEENES[166.9984]DNEK           | 3 | 1.265  | 0.003    | -0.003    | 1 | 32.05 | 19 | 326 | 16 | 1531 | -1.44 |
| 1356.6  | 18 | P11388       | K.SVVSLEADDDVK.K SVVS[166.9984]DLEADDVK           | 2 | 1.978  | 9.70E-06 | -0.002    | 0 | 58.13 | 21 | 326 | 16 | 1531 | -1.5  |
| 1308.6  | 7  | P11388       | K.TQMAEVLPSR.G TQMAEVLPS[166.9984]PR              | 2 | 1.609  | 1.20E-04 | -0.002    | 0 | 47.45 | 21 | 326 | 16 | 1531 | -1.33 |
| 2366.1  | 17 | P11388       | K.IKNTENGSPQEDG.IKNTENG[166.9984]QEDGV            | 3 | 1.447  | 0.002    | -0.004    | 1 | 36.87 | 22 | 326 | 16 | 1531 | -1.85 |
| 1699.7  | 15 | P11388       | K.TDDEDFVPSDAPF.TDDEDFVPSDAS[166.9984]PK          | 2 | 1.122  | 4.30E-04 | -0.004    | 0 | 41.58 | 20 | 326 | 16 | 1531 | -2.4  |
| 2326.9  | 15 | P11388       | K.EAQKVPDEEENE.EAQKVPDEEENES[166.9984]E           | 3 | 0.362  | 0.023    | -0.005    | 1 | 22.98 | 19 | 367 | 14 | 1531 | -1.31 |
| 1356.6  | 8  | P11388       | K.SVVSLEADDDVK.K SVVS[166.9984]VSDLEADDVK         | 2 | 2.402  | 2.00E-05 | -0.002    | 0 | 54.33 | 20 | 367 | 14 | 1531 | -1.57 |
| 1454.16 | 21 | P11388       | K.VLEEDDLDL.F VLEES[166.9984]DDEDLDF              | 3 | -0.317 | 0.01     | -0.001    | 0 | 24.09 | 17 | 348 | 16 | 1531 | -0.73 |
| 2784.3  | 21 | P11388       | K.GVPLSSSPPATHF.GVPLSS[166.9984]SPPATHFPL         | 3 | -0.003 | 0.047    | -0.005    | 0 | 21.31 | 21 | 385 | 15 | 1531 | -1.79 |
| 3283.4  | 30 | P11474       | K.AEPASDPSPKGSSE.AEPAS[166.9984]PDS[166.9984]     | 3 | 0.258  | 0.03     | -0.008    | 1 | 22.98 | 20 | 43  | 3  | 423  | -2.5  |
| 3203.4  | 19 | P11474       | K.AEPASDPSPKGSSE.AEPASDPS[166.9984]PKGS[166       | 3 | 1.12   | 0.004    | -0.008    | 1 | 32.6  | 21 | 43  | 3  | 423  | -2.49 |
| 3203.4  | 11 | P11474       | K.AEPASDPSPKGSSE.AEPASDPSPKGSSE[181.014]ET        | 3 | 0.94   | 0.006    | -0.008    | 1 | 30.75 | 21 | 37  | 2  | 423  | -2.49 |
| 3283.4  | 18 | P11474       | K.AEPASDPSPKGSSE.AEPASDPSPKGS[166.9984]S[16       | 3 | 0.498  | 0.018    | -0.008    | 1 | 25.33 | 20 | 37  | 2  | 423  | -2.5  |
| 3203.4  | 10 | P11474       | K.AEPASDPSPKGSSE.AEPASDPSPKGS[166.9984]ET         | 3 | 1.655  | 9.50E-04 | -0.008    | 1 | 38.43 | 21 | 37  | 2  | 423  | -2.49 |
| 3203.4  | 11 | P11474       | K.AEPASDPSPKGSSE.AEPAS[166.9984]PDS[166.9984]     | 3 | 1.668  | 2.10E-04 | -0.008    | 1 | 44.94 | 21 | 52  | 2  | 423  | -2.49 |
| 2577.2  | 12 | P11717       | K.ALSLHGDQDDEE.ALSLHGDQDDE[166.9984]EDE           | 2 | 1.814  | 8.70E-05 | -0.006    | 0 | 48.5  | 20 | 54  | 8  | 2491 | -2.47 |
| 1834.8  | 13 | P11717       | K.LVSFHDDSDLEDLH.LVSFHDD[166.9984]EDLH            | 3 | 0.499  | 0.015    | -0.002    | 0 | 26.35 | 21 | 115 | 12 | 2491 | -1.31 |
| 2657.1  | 6  | P11717       | K.ALSLHGDQDDEE.ALS[166.9984]S[166.9984]LHG        | 3 | 0.233  | 0.031    | -0.006    | 0 | 22.73 | 20 | 28  | 5  | 2491 | -2.29 |
| 1722.8  | 9  | P12270       | K.EGVQPLNVLSLEE.EGVQPLNV[166.9984]LSEE            | 2 | 1.058  | 4.70E-04 | -0.003    | 0 | 41.94 | 21 | 55  | 4  | 2363 | -1.72 |
| 2389.1  | 10 | P12931       | R.SLEPAENVHAGGG.S[166.9984]LEPAENVHAGGG           | 2 | 0.357  | 0.002    | -0.005    | 0 | 34.83 | 21 | 40  | 3  | 536  | -1.96 |
| 2243    | 7  | P13010       | K.DQVTAQEIFDNH.DQVTAQEIFDNHEDGPTAK                | 3 | 0.197  | 0.03     | -0.004    | 0 | 23.37 | 21 | 23  | 2  | 732  | -2.2  |
| 2622.1  | 28 | P13051       | K.KAPAQEEPTGPPS.KAPAQEEPTGPPS[166.9984]S          | 3 | 1.005  | 0.005    | -0.006    | 1 | 30.39 | 20 | 30  | 1  | 313  | -2.25 |
| 1430.6  | 6  | P13073       | K.SDFSLPAYMDR.R SDFSLPAYMDR                       | 2 | 0.618  | 0.001    | -0.002    | 0 | 36.44 | 20 | 36  | 1  | 169  | -1.71 |
| 2116.9  | 10 | P13611       | R.QEIESETTSEEQI.QEIESETTS[166.9984]EEQI           | 3 | 1.978  | 4.80E-05 | -0.005    | 0 | 50.02 | 19 | 74  | 8  | 3396 | -2.41 |
| 1794.8  | 8  | P13611       | R.MSDLSVGHPIDE.MSDLSVGHPIDES[166.9984]I           | 3 | 1.246  | 0.003    | -0.003    | 0 | 32.86 | 20 | 74  | 8  | 3396 | -1.7  |
| 1794.8  | 8  | P13611       | R.MSDLSVGHPIDE.MSDLSVGHPIDES[166.9984]S           | 3 | 0.98   | 0.006    | -0.003    | 0 | 30.14 | 20 | 100 | 7  | 3396 | -1.7  |
| 2939.3  | 17 | P13611       | R.QEVNVRQIESET.QEVNVRQIESETTS[166.9984]I          | 3 | 0.415  | 0.02     | -0.007    | 1 | 24.49 | 20 | 100 | 7  | 3396 | -2.38 |
| 2591    | 9  | P13861       | R.RVSVCAETYPDEE.RVSV[166.9984]VC[160.0307]A       | 2 | 1.011  | 4.60E-04 | -0.004    | 1 | 40.47 | 20 | 84  | 7  | 404  | -1.51 |
| 2633.1  | 15 | P13861       | R.VADAKGDESEED.VADAKGDS[166.9984]ES[166.9         | 3 | 0.155  | 0.033    | -0.005    | 1 | 21.95 | 20 | 84  | 7  | 404  | -1.75 |
| 2148.6  | 6  | P13861       | K.GDSEEDLEVP.GDS[166.9984]ES[166.9984]EE          | 2 | 0.045  | 0.005    | -0.006    | 0 | 27.76 | 17 | 99  | 8  | 404  | -2.68 |
| 2591    | 9  | P13861       | R.RVSVCAETYPDEE.RVSV[160.0307]AET[181.014]I       | 3 | 1.257  | 0.003    | -0.006    | 1 | 32.92 | 20 | 78  | 8  | 404  | -2.17 |
| 2553.1  | 20 | P13861       | R.VADAKGDESEED.VADAKGDS[166.9984]EDED             | 3 | 0.686  | 0.011    | -0.006    | 1 | 27.29 | 20 | 115 | 7  | 404  | -2.3  |
| 2553.1  | 19 | P13861       | R.VADAKGDESEED.VADAKGDS[166.9984]EDED             | 3 | 0.727  | 0.01     | -0.006    | 1 | 27.27 | 20 | 84  | 7  | 404  | -2    |

|        |    |              |                                                 |        |          |           |   |       |    |     |    |      |       |
|--------|----|--------------|-------------------------------------------------|--------|----------|-----------|---|-------|----|-----|----|------|-------|
| 4587.2 | 45 | P16989       | K.SPVGSGAPQAAAP.S[166.9984]PVGSGAPQAAAPAI 4     | 0.246  | 0.012    | -0.01     | 1 | 24.72 | 18 | 114 | 8  | 372  | -2.22 |
| 2689.9 | 25 | P16989       | R.NYAGEEEEEEGSSSI NYAGEEEEEEGSS[166.9984]S[1 3  | 0.178  | 0.035    | -0.005    | 0 | 19.13 | 17 | 86  | 7  | 372  | -2.03 |
| 4587.2 | 15 | P16989       | K.SPVGSGAPQAAAP.SPVGSG[166.9984]GAPQAAAPAI 4    | 0.191  | 0.004    | -0.01     | 1 | 29.36 | 18 | 103 | 8  | 372  | -2.22 |
| 2610   | 24 | P16989       | R.NYAGEEEEEEGSSSI NYAGEEEEEEGSS[166.9984]GSSE 2 | 1.624  | 1.20E-04 | -0.004    | 0 | 45.5  | 19 | 103 | 8  | 372  | -1.59 |
| 2689.9 | 10 | P16989       | R.NYAGEEEEEEGSSSI NY[243.0297]AGEEEEEEGSS[1 3   | 0.196  | 0.033    | -0.005    | 0 | 19.39 | 17 | 85  | 8  | 372  | -2.03 |
| 4459.1 | 34 | P16989       | K.SPVGSGAPQAAAP.SPVGSGAPQAAAPAAHVA 4            | 0.15   | 0.001    | -0.012    | 0 | 35.34 | 18 | 103 | 7  | 372  | -2.67 |
| 3801.7 | 8  | P17010,P0804 | K.ADPGEDDLGGTV ADPGEEDDLGGTVDIVES[166.998 3     | 0.401  | 0.022    | -0.003    | 0 | 24.37 | 20 | 24  | 0  | 0    | -0.7  |
| 1409.6 | 9  | P17029       | R.EATGLSPQAQAEK.I.EATGLS[166.9984]PQAQAEK 2     | 0.901  | 7.00E-04 | -0.003    | 0 | 40.4  | 21 | 40  | 1  | 563  | -1.9  |
| 1898.6 | 11 | P17096       | K.EEEEGISQESSEEQ.EEEEGISQES[166.9984]S[166.9 2  | 0.442  | 0.002    | -0.004    | 0 | 28.78 | 14 | 64  | 2  | 107  | -1.98 |
| 1818.6 | 13 | P17096       | K.EEEEGISQESSEEQ.EEEEGISQES[166.9984]EEEQ 2     | 1.978  | 2.50E-05 | -0.005    | 0 | 50    | 16 | 64  | 2  | 107  | -2.77 |
| 1818.6 | 14 | P17096       | K.EEEEGISQESSEEQ.EEEEGIS[166.9984]QESSEEQ 2     | 0.255  | 0.003    | -0.005    | 0 | 28.91 | 16 | 77  | 3  | 107  | -2.77 |
| 1818.6 | 12 | P17096       | K.EEEEGISQESSEEQ.EEEEGISQES[166.9984]SEEQ 2     | 1.127  | 4.40E-04 | -0.005    | 0 | 37.49 | 16 | 43  | 2  | 107  | -2.77 |
| 2201.9 | 20 | P17275       | R.SRDATPPVSPINME.SRDAT[181.014]PPVS[166.998 3   | 0.828  | 0.008    | -0.004    | 1 | 27.68 | 19 | 43  | 5  | 347  | -1.94 |
| 2121.9 | 20 | P17275       | R.SRDATPPVSPINME.S[166.9984]RDATPPVSPINMED 3    | 0.07   | 0.046    | -0.004    | 1 | 21.1  | 20 | 64  | 5  | 347  | -2.1  |
| 2121.9 | 9  | P17275       | R.SRDATPPVSPINME.SRDAT[181.014]PPVSPPINMED 3    | 1.58   | 0.001    | -0.004    | 1 | 36.14 | 20 | 73  | 4  | 347  | -2.1  |
| 3243.3 | 10 | P17535       | K.DEPQTPVDPVPSFGE.DEPQTPVDPVPSFGE[166.9984] 3   | 0.75   | 0.008    | -0.006    | 0 | 26.9  | 19 | 35  | 3  | 347  | -1.96 |
| 3739.7 | 20 | P17535       | R.LAALKDEPQTPVDPV.LAALKDEPQTPVDPVPSFGE[166. 3   | 1.376  | 0.002    | -0.006    | 1 | 34.11 | 20 | 44  | 5  | 347  | -1.68 |
| 3163.4 | 13 | P17535       | K.DEPQTPVDPVPSFGE.DEPQTPVDPVPS[166.9984]FGE 3   | 0.076  | 0.039    | -0.004    | 0 | 21.11 | 20 | 44  | 5  | 347  | -1.25 |
| 994.46 | 9  | P17535,P0541 | K.LASPELER.L.LAS[166.9984]PELER 2               | -0.263 | 0.009    | -0.002    | 0 | 26.73 | 19 | 35  | 0  | 0    | -1.87 |
| 1536.6 | 15 | P17706       | K.EDLSPAFDHPNK.I.EDLSPAFDHS[166.9984]PNK 2      | -0.822 | 0.038    | -0.002    | 0 | 22.07 | 20 | 22  | 3  | 415  | -1.24 |
| 1516.6 | 8  | P17812       | R.SGSSSPDSEITELK.F.SGSS[166.9984]PDSEITELK 2    | 0.283  | 0.003    | -0.003    | 0 | 32.19 | 19 | 32  | 4  | 591  | -1.99 |
| 1596.6 | 10 | P17812       | R.SGSSSPDSEITELK.F.SGSS[166.9984]PD 2           | -0.671 | 0.023    | -0.002    | 0 | 21.51 | 18 | 31  | 4  | 591  | -1.59 |
| 2131.8 | 17 | P17936       | K.VDYESQSTDTQNFSS.VDYESQSTDTQNFSS[166.9984]S 2  | 1.978  | 8.30E-06 | -0.007    | 0 | 57.25 | 19 | 57  | 1  | 291  | -3.11 |
| 2131.8 | 16 | P17936       | K.VDYESQSTDTQNFSS.VDYESQSTDTQNFSS[166.9984] 2   | 1.464  | 1.80E-04 | -0.007    | 0 | 44    | 19 | 44  | 3  | 291  | -3.11 |
| 2287.9 | 16 | P17936       | K.VDYESQSTDTQNFSS.VDYESQSTDTQNFSS[166.9984]S 2  | -0.669 | 0.025    | -0.008    | 1 | 23.62 | 20 | 24  | 2  | 291  | -3.65 |
| 2302   | 16 | P18031       | K.GSPLNAAPYGIEM.S[166.9984]PLNAAPYGIEMSS 3      | 1.41   | 0.001    | -0.004    | 0 | 37.29 | 21 | 74  | 2  | 435  | -1.73 |
| 1101.5 | 8  | P18077       | R.DETEFYLGK.R.DETEFYLGK 2                       | -0.697 | 0.027    | -0.002    | 0 | 23.39 | 20 | 23  | 1  | 110  | -1.79 |
| 1550.6 | 12 | P18206       | R.DPSASPGDAGEQA.DPSAS[166.9984]PGDAGEQAIR 2     | 1.978  | 2.70E-07 | -0.003    | 0 | 72.73 | 20 | 73  | 1  | 1134 | -2.22 |
| 1452.7 | 11 | P18583       | K.ESDQTLAALLSP.E.SDQTLAALLS[166.9984]PK 2       | 2.732  | 4.30E-06 | -0.002    | 0 | 62.41 | 21 | 175 | 5  | 2426 | -1.19 |
| 2425   | 12 | P18583       | K.EMEHNTVCAAGTS.EMEHNTV[160.0307]AAGT[18 2      | 2.44   | 1.80E-05 | -0.005    | 0 | 55.76 | 21 | 175 | 5  | 2426 | -2.27 |
| 2425   | 13 | P18583       | K.EMEHNTVCAAGTS.EMEHNTV[160.0307]AAGT[1 2       | 2.703  | 9.80E-06 | -0.005    | 0 | 58.39 | 21 | 175 | 5  | 2426 | -2.27 |
| 1052.4 | 7  | P18583       | R.SFSPVPR.L.SFSPVPR[166.9984]PVF 2              | -0.918 | 0.048    | -0.002    | 0 | 20.08 | 19 | 114 | 7  | 2426 | -1.84 |
| 1769.8 | 10 | P18583       | R.CVSVQTDPTDPTI.C[160.0307]V[166.9984]VQTI 2    | 0.083  | 0.004    | -0.004    | 0 | 32.12 | 21 | 160 | 10 | 2426 | -2.23 |
| 1397.6 | 9  | P18583       | R.SAASPVVSSMPER.SAAS[166.9984]PVVSSMPER 2       | 0.44   | 0.002    | -0.003    | 0 | 34.69 | 20 | 160 | 10 | 2426 | -2.24 |
| 972.46 | 6  | P18583       | R.SFSPVPR.L.SFSPVPR[166.9984]PVR 2              | -0.05  | 0.006    | -0.002    | 0 | 30.72 | 21 | 218 | 8  | 2426 | -1.77 |
| 1871.8 | 9  | P18583       | K.SHDDGNDI.DSLEF.SHDDGNDI.DSLES[166.9984]FU 3   | 1.374  | 0.002    | -0.003    | 0 | 34.41 | 20 | 218 | 8  | 2426 | -1.38 |
| 2143   | 17 | P18615       | K.RLSLSEQVMDTATF.RLSL[166.9984]EQVMDTATAT 3     | 0.496  | 0.016    | -0.004    | 1 | 26.32 | 21 | 78  | 4  | 380  | -1.76 |
| 2143   | 13 | P18615       | K.RLSLSEQVMDTATF.RS[166.9984]LSEQVMDTATAT 3     | 2.281  | 2.60E-04 | -0.004    | 1 | 44.14 | 21 | 44  | 3  | 380  | -1.76 |
| 1502.6 | 8  | P18615       | R.SISADDDLQESSR.R.SIS[166.9984]ADDDLQESSR 2     | 1.982  | 7.30E-07 | -0.003    | 0 | 67.34 | 18 | 78  | 4  | 380  | -1.94 |
| 1612.7 | 9  | P18858       | K.EWNGVVSSEDS.PV.EWNGVVSSEDS[166.9984]PVK 2     | 0.199  | 0.003    | -0.003    | 0 | 32.35 | 20 | 194 | 12 | 919  | -2.08 |
| 1839.8 | 11 | P18858       | R.VLGSSEEEDEALS.VLGS[166.9984]EEDEEDALS 2       | 1.576  | 1.30E-04 | -0.003    | 0 | 48.12 | 22 | 194 | 12 | 919  | -1.64 |
| 1754.8 | 11 | P18858       | K.AETPTSEVSEPVAT.AET[181.014]PTSEVSEPVATK 2     | 0.588  | 0.002    | -0.005    | 0 | 36.24 | 20 | 194 | 12 | 919  | -2.71 |
| 1919.8 | 10 | P18858       | R.VLGSSEEEDEALS.VLGS[166.9984]EEDEEDALS[1 2     | 2.732  | 7.50E-06 | -0.005    | 0 | 58.59 | 20 | 194 | 12 | 919  | -2.42 |
| 1839.8 | 8  | P18858       | R.VLGSSEEEDEALS.VLGSSEEEDEALS[166.9984]PA 2     | 1.634  | 1.20E-04 | -0.009    | 0 | 47.7  | 21 | 194 | 12 | 919  | -4.74 |
| 1754.8 | 10 | P18858       | K.AETPTSEVSEPVAT.AET[181.014]ESVSEPVATK 2       | -0.277 | 0.011    | -0.005    | 0 | 27.54 | 20 | 99  | 10 | 919  | -2.71 |
| 1612.7 | 7  | P18858       | K.EWNGVVSSEDS.PV.EWNGVVSSEDS[166.9984]DSPVK 2   | 0.839  | 7.70E-04 | -0.003    | 0 | 38.68 | 20 | 174 | 11 | 919  | -2.08 |
| 4336.4 | 20 | P19174       | K.IYSEETSDQNGE.IY[243.0297]SEET[181.014]S[ 4    | 0.246  | 0.015    | -0.018    | 1 | 18.17 | 13 | 18  | 3  | 1290 | 4.08  |
| 4526.5 | 23 | P19338       | K.AAAAAPASEDEDD.AAAAAPASEDEDEDEDEDDI 4          | 0.038  | 8.30E-05 | -0.01     | 0 | 42.86 | 15 | 225 | 20 | 710  | -2.24 |
| 3473.2 | 23 | P19338       | K.EVEEDSEDEEMSED.EVEEDSEDEEMSEDEEDDS[166. 3     | 1.41   | 9.30E-04 | -0.008    | 0 | 33.95 | 16 | 225 | 20 | 710  | -2.29 |
| 4606.5 | 31 | P19338       | K.AAAAAPASEDEDD.AAAAAPAS[166.9984]EDEDDEI 4     | 0.038  | 3.70E-04 | -0.009    | 0 | 35.1  | 13 | 225 | 20 | 710  | -1.99 |
| 3393.3 | 17 | P19338       | K.EVEEDSEDEEMSED.EVEEDSEDEEMSEDEEDDS[166 3      | 0.52   | 0.015    | -0.008    | 0 | 23.6  | 18 | 225 | 20 | 710  | -2.34 |
| 1641.6 | 17 | P19338       | K.GFGVDFNSEDAK.GFGVDFNS[166.9984]EEDAK 2        | 1.148  | 3.50E-04 | -0.002    | 0 | 40.84 | 19 | 225 | 20 | 710  | -1.5  |
| 4199.4 | 18 | P19338       | K.KEDSDEEEDDSE.KEDS[166.9984]DEEEDDSEED 4       | 0.038  | 1.20E-04 | -0.01     | 1 | 41.37 | 15 | 225 | 20 | 710  | -2.46 |
| 4279.4 | 20 | P19338       | K.KEDSDEEEDDSE.KEDS[166.9984]DEEEDDSEED[16 4    | 0.038  | 0.001    | -0.01     | 1 | 30.35 | 14 | 225 | 20 | 710  | -2.31 |
| 3521.4 | 18 | P19338       | K.EVEEDSEDEEMSED.EVEEDSEDEEMSEDEEDDS[166 3      | 1.41   | 5.00E-05 | -0.007    | 1 | 49.69 | 19 | 225 | 20 | 710  | -1.99 |
| 3553.2 | 12 | P19338       | K.EVEEDSEDEEMSED.EVEEDS[166.9984]DEEEMS[16 3    | 1.28   | 0.002    | -0.007    | 0 | 27.15 | 14 | 137 | 17 | 710  | -1.97 |
| 3681.3 | 14 | P19338       | K.EVEEDSEDEEMSED.EVEEDS[166.9984]DEEEMSEDE 3    | 1.109  | 0.004    | -0.007    | 1 | 28.44 | 17 | 137 | 17 | 710  | -1.89 |
| 3761.3 | 25 | P19338       | K.EVEEDSEDEEMSED.EVEEDS[166.9984]DEEEMS[16 3    | 0.578  | 0.013    | -0.006    | 1 | 22.11 | 16 | 165 | 19 | 710  | -1.67 |
| 3601.3 | 17 | P19338       | K.EVEEDSEDEEMSED.EVEEDSEDEEMSEDEEDDS[166. 3     | 0.137  | 0.034    | -0.009    | 1 | 20.72 | 19 | 137 | 17 | 710  | -2.42 |
| 3601.3 | 19 | P19338       | K.EVEEDSEDEEMSED.EVEEDS[166.9984]DEEEMS[16 3    | 0.918  | 0.006    | -0.009    | 1 | 28.51 | 19 | 165 | 19 | 710  | -2.42 |
| 1474.7 | 13 | P19338       | R.LELQGRGSPNAR.LELQGRGS[166.9984]PNAR 2         | -0.853 | 0.035    | -0.003    | 1 | 22.73 | 21 | 165 | 19 | 710  | -1.75 |
| 3681.3 | 19 | P19338       | K.EVEEDSEDEEMSED.EVEEDS[166.9984]DEEEMS[16 3    | 0.767  | 0.01     | -0.007    | 1 | 25    | 17 | 165 | 19 | 710  | -1.89 |
| 4199.4 | 15 | P19338       | K.KEDSDEEEDDSE.KEDSDEEEDDS[166.9984]EED 4       | 0.191  | 0.001    | -0.01     | 1 | 31.13 | 15 | 165 | 19 | 710  | -2.46 |
| 937.51 | 6  | P19338       | K.KVVVSPTK.K.KVVVS[166.9984]PTK 2               | 0.147  | 0.004    | -8.00E-04 | 1 | 31.8  | 20 | 137 | 17 | 710  | -0.86 |
| 3521.4 | 17 | P19338       | K.EVEEDSEDEEMSED.EVEEDSEDEEMSEDEEDDS[166. 3     | 1.655  | 4.60E-06 | -0.009    | 1 | 60.08 | 19 | 279 | 25 | 710  | -1.99 |
| 3633.2 | 5  | P19338       | K.EVEEDSEDEEMSED.EVEEDS[166.9984]DEEEMS[16 3    | 0.368  | 0.02     | -0.009    | 0 | 17.03 | 13 | 279 | 25 | 710  | -2.4  |
| 5278.7 | 28 | P19338       | K.NVAEDEEEEDDEE.NVAEDEEEDEDEDEDDDDI 4           | -0.068 | 0.046    | -0.005    | 0 | 13.97 | 13 | 279 | 25 | 710  | -1.03 |
| 937.51 | 7  | P19338       | K.KVVVSPTK.K.KVVVSPT[181.014]K 2                | -0.455 | 0.015    | -8.00E-04 | 1 | 25.74 | 20 | 279 | 25 | 710  | -0.86 |
| 3601.3 | 15 | P19338       | K.EVEEDSEDEEMSED.EVEEDSEDEEMSEDEEDDS[166. 3     | 1.394  | 4.30E-04 | -0.009    | 1 | 39.66 | 19 | 227 | 24 | 710  | -2.42 |
| 3473.2 | 23 | P19338       | K.EVEEDSEDEEMSED.EVEEDSEDEEMSEDEEDDS[166. 3     | 1.074  | 0.004    | -0.008    | 0 | 27.17 | 16 | 227 | 24 | 710  | -2.29 |
| 3601.3 | 15 | P19338       | K.EVEEDSEDEEMSED.EVEEDSEDEEMSEDEEDDS[166. 3     | 0.1    | 0.037    | -0.009    | 1 | 20.34 | 19 | 232 | 15 | 710  | -2.42 |
| 3681.3 | 15 | P19338       | K.EVEEDSEDEEMSED.EVEEDS[166.9984]DEEEMS[16 3    | 1.374  | 0.002    | -0.007    | 1 | 31.9  | 17 | 232 | 15 | 710  | -1.89 |
| 1178.6 | 5  | P19338       | K.EVFEDAAEIR.L.EVFEDAAEIR 2                     | -0.548 | 0.019    | -0.002    | 0 | 24.78 | 20 | 165 | 19 | 710  | -1.67 |
| 3553.2 | 19 | P19338       | K.EVEEDSEDEEMSED.EVEEDS[166.9984]DEEEMS[16 3    | 1.394  | 0.002    | -0.007    | 0 | 29.4  | 14 | 227 | 24 | 710  | -1.97 |
| 2241   | 6  | P19404       | R.DTPENNDPDTFDT.DTPENNDPDTFDTFDTFDTFDT 2        | -0.85  | 0.039    | -0.002    | 0 | 22.79 | 21 | 23  | 2  | 249  | -0.65 |
| 2445   | 12 | P19634       | K.ETSSPGTDDVFTPA.ETSSPGTDDVFTPAPS[166.99 2      | 2.732  | 4.20E-06 | -0.005    | 0 | 61.62 | 20 | 118 | 5  | 815  | -1.91 |
| 1269.6 | 9  | P19634       | R.IGSDPLAYEPEK.E.IGSD[166.9984]DPLAYEPEK 2      | 1.978  | 1.10E-05 | -0.002    | 0 | 56.73 | 20 | 118 | 5  | 815  | -1.6  |
| 2445   | 14 | P19634       | K.ETSSPGTDDVFTPA.ETSSPGTDDVFTPAPS[166.99 2      | 1.233  | 0.003    | -0.005    | 0 | 32.73 | 20 | 118 | 5  | 815  | -1.99 |
| 2445   | 22 | P19634       | K.ETSSPGTDDVFTPA.ETSSPGTDDVFTPAPS[166.9984 3    | 1.571  | 0.002    | -0.005    | 0 | 36.06 | 20 | 120 | 7  | 815  | -1.99 |
| 2274   | 18 | P19634       | R.CLSDPGHPPEGPEG.[160.0307]L[166.9984]DPGF 3    | 0.671  | 0.012    | -0.004    | 0 | 27.04 | 20 | 152 | 6  | 815  | -1.77 |
| 986.4  | 5  | P19634       | K.LDSPTMSR.A.LDS[166.9984]PTMSR 2               | -0.02  | 0.006    | -0.002    | 0 | 28.19 | 18 | 170 | 7  | 815  | -1.48 |
| 2616.1 | 23 | P20020       | R.IEDSEPHIPLIDDD.IEDS[166.9984]EPHIPLIDDD 3     | 2.572  | 7.70E-06 | -0.005    | 0 | 58.89 | 20 | 131 | 5  | 1258 | -1.85 |
| 2696.1 | 12 | P20020       | R.IEDSEPHIPLIDDD.IEDS[166.9984]EPHIPLIDDD[18 3  | 1.41   | 7        |           |   |       |    |     |    |      |       |

|         |    |              |                                                     |        |          |          |   |       |    |     |    |      |       |
|---------|----|--------------|-----------------------------------------------------|--------|----------|----------|---|-------|----|-----|----|------|-------|
| 2356.1  | 7  | P23588       | K.TISLDFLAEDGGTC TIS[166.9984]LDFLAEDGGTGC          | -0.295 | 0.011    | -0.006   | 0 | 28.36 | 21 | 76  | 3  | 611  | -2.68 |
| 2352.8  | 16 | P24534       | K.DDDDDILFGSDDEE DDDDDILFGS[166.9984]DDEE           | 1.978  | 1.20E-05 | -0.005   | 0 | 53.41 | 17 | 94  | 4  | 225  | -1.98 |
| 4104.6  | 37 | P24534       | K.YGPADVEDTTGSG YGPADVEDTTGSGATDSKDDDDI             | 0.038  | 6.20E-06 | -0.009   | 1 | 58.13 | 19 | 94  | 4  | 225  | -2.19 |
| 1024.5  | 5  | P24752       | K.DGLTDDVYK.I DGLTDDVYK                             | -0.813 | 0.036    | -0.002   | 0 | 23.09 | 21 | 23  | 1  | 427  | -2.21 |
| 1606.7  | 9  | P24928       | K.YSPSTPYSPPTPK.Y YSPSTPY[166.9984]PYSPPTPK         | -0.781 | 0.029    | -0.004   | 0 | 23.55 | 21 | 24  | 6  | 1970 | -2.21 |
| 1672.7  | 10 | P24928,P2492 | K.YSPSTPYSPPTPK.Y YSPSTPY[243.0297]SPTS[166.1       | -0.774 | 0.03     | -0.003   | 0 | 22.57 | 20 | 34  | 4  | 204  | -1.8  |
| 1672.7  | 15 | P24928,P2492 | K.YSPSTPYSPPTPK.Y YSPSTPY[243.0297]SPTS[166.9984]PT | -0.622 | 0.022    | -0.003   | 0 | 24    | 20 | 24  | 4  | 204  | -1.8  |
| 2882.1  | 11 | P25205       | K.DGDSYDPYFSDTE DGDSYDPYFDS[166.9984]DTEE           | 1.41   | 4.60E-04 | -0.006   | 0 | 41.05 | 20 | 68  | 3  | 808  | -2.21 |
| 2882.1  | 16 | P25205       | K.DGDSYDPYFSDTE DGDSYDPYFDS[166.9984]DTEE           | 1.167  | 0.004    | -0.005   | 0 | 32.07 | 20 | 68  | 3  | 808  | -1.86 |
| 2962.1  | 14 | P25205       | K.DGDSYDPYFSDTE DGDSYDPYFDS[166.9984]DTEE           | 1.41   | 0.002    | -0.007   | 0 | 34.26 | 19 | 68  | 3  | 808  | -2.22 |
| 2962.1  | 14 | P25205       | K.DGDSYDPYFSDTE DGDSYDPYFDS[166.9984]DTEE           | 1.227  | 0.003    | -0.007   | 0 | 31.62 | 19 | 57  | 4  | 808  | -2.22 |
| 2882.1  | 10 | P25205       | K.DGDSYDPYFSDTE DGDSYDPYFSDT[181.014]EEE            | 1.348  | 0.002    | -0.005   | 0 | 33.83 | 20 | 60  | 5  | 808  | -1.86 |
| 2962.1  | 13 | P25205       | K.DGDSYDPYFSDTE DGDSYDPYFSDT[181.014]EEE            | 1.374  | 0.002    | -0.007   | 0 | 34.55 | 19 | 56  | 5  | 808  | -2.22 |
| 2734.3  | 18 | P25440       | K.ADTTPTTALAPC ADTTPTTALAPGS[166.9984]              | 0.052  | 0.043    | -0.006   | 0 | 20.86 | 20 | 21  | 4  | 801  | -2.04 |
| 2974.4  | 10 | P25445       | K.ENQGSHESTLNPE ENQGSHESTP[181.014]LNPEV            | 0.972  | 0.005    | -0.003   | 0 | 30.12 | 20 | 31  | 1  | 335  | -1.01 |
| 2974.4  | 22 | P25445       | K.ENQGSHESTLNPE ENQGS[166.9984]HESPTLNPE            | 1.001  | 0.005    | -0.003   | 0 | 30.34 | 20 | 30  | 1  | 335  | -1.01 |
| 3275.4  | 19 | P25490       | K.DIDHETVVEEQIGE DIDHETVVEEQIGENS[166.9984]         | 0.605  | 0.012    | -0.005   | 0 | 26.41 | 20 | 43  | 2  | 414  | -1.63 |
| 1735.6  | 13 | P25788       | K.ESLKEEDESDDNN ESLKEEDES[166.9984]DDNNM            | 1.077  | 4.60E-04 | -0.004   | 1 | 37.13 | 16 | 37  | 1  | 255  | -2.18 |
| 1620.6  | 9  | P26006       | K.SQPSETERLTDY.- SQPS[166.9984]ETERLTDY             | 1.041  | 4.20E-04 | -0.003   | 1 | 40.77 | 20 | 41  | 3  | 1051 | -2.03 |
| 1620.6  | 9  | P26006       | K.SQPSETERLTDY.- SQPS[166.9984]ETERLTDY             | 1.244  | 2.60E-04 | -0.003   | 1 | 42.83 | 20 | 43  | 2  | 1051 | -2.03 |
| 1769.7  | 8  | P26045       | K.GSLAPQDSSEVSC GSLAPQDS[166.9984]DSEVSQ            | 0.057  | 0.004    | -0.004   | 0 | 30.88 | 20 | 31  | 1  | 913  | -2.07 |
| 2224.8  | 6  | P26358       | K.EADDDEEVDDNPE EADDDEEVDDNPEMPS[166.99             | 0.859  | 6.50E-04 | -0.006   | 0 | 38.95 | 20 | 67  | 6  | 1616 | -2.62 |
| 2352.9  | 14 | P26358       | K.EADDDEEVDDNPE EADDDEEVDDNPEMPS[166.99             | 1.988  | 5.20E-04 | -0.005   | 1 | 40.28 | 20 | 67  | 6  | 1616 | -1.94 |
| 3743.6  | 22 | P26374       | R.DSSGSRSSVGNLPS DSSGSRSSV[243.0297]NGLPSN          | -0.098 | 0.049    | 0.013    | 1 | 20.81 | 20 | 21  | 1  | 656  | 3.37  |
| 2535    | 12 | P27348       | R.DNLLTWTSDSAGEE DNLLTWT[181.014]SDSAGEEC           | 0.605  | 0.011    | -0.005   | 0 | 25.45 | 19 | 78  | 4  | 245  | -1.81 |
| 2455    | 20 | P27348       | R.DNLLTWTSDSAGEE DNLLTWTSDSAGEEC[160.0307]          | 0.16   | 0.035    | -0.005   | 0 | 22    | 20 | 78  | 4  | 245  | -2.14 |
| 2535    | 14 | P27348       | R.DNLLTWTSDSAGEE DNLLTWTSDSAGEEC[166.9984]          | -0.413 | 0.012    | -0.004   | 0 | 25.16 | 19 | 72  | 5  | 245  | -1.53 |
| 2535    | 16 | P27348       | R.DNLLTWTSDSAGEE DNLLTWTSDSAGEEC[166.9984]          | 0.865  | 0.006    | -0.005   | 0 | 28    | 19 | 72  | 5  | 245  | -1.81 |
| 2535    | 24 | P27348       | R.DNLLTWTSDSAGEE DNLLTWTSDSAGEEC[166.9984]          | 0.881  | 0.006    | -0.005   | 0 | 28.21 | 19 | 59  | 4  | 245  | -1.81 |
| 1544.7  | 8  | P27635       | K.FNAEDFEDMVAEK FNAEDFEDMVAEK                       | 0.024  | 0.004    | -0.002   | 0 | 31.55 | 21 | 32  | 1  | 214  | -0.99 |
| 1696.8  | 9  | P27708       | R.IHRASDGLPAEPI IHRAS[166.9984]DPLPAEPEK            | 0.628  | 0.013    | -0.003   | 1 | 27.62 | 21 | 28  | 3  | 2225 | -1.94 |
| 1410.6  | 8  | P27797       | K.EQFLDGGWTSR.I EQFLDGGWTSR                         | -0.634 | 0.023    | -0.002   | 0 | 24.99 | 21 | 25  | 1  | 417  | -1.78 |
| 2960.3  | 16 | P27797       | K.KPEDWDEEMGE KPEDWDEEMGEWEPPIQNEP                  | 1.03   | 0.005    | -0.005   | 1 | 31.7  | 21 | 32  | 2  | 417  | -1.38 |
| 1627.8  | 8  | P27816       | K.DMESPTKLDVTLAK DMES[166.9984]PTKLDVTLAK           | 1.159  | 3.50E-04 | -0.004   | 1 | 42.95 | 21 | 85  | 5  | 1152 | -2.18 |
| 1627.8  | 11 | P27816       | K.DMESPTKLDVTLAK DMESPT[181.014]KLDVTLAK            | 1.41   | 9.00E-04 | -0.003   | 1 | 38.43 | 21 | 85  | 5  | 1152 | -1.93 |
| 1616.8  | 11 | P27816       | K.DVTPPETEVVLIK.I DVTPPETEVVLIK                     | -0.636 | 0.024    | -0.003   | 0 | 24    | 20 | 85  | 5  | 1152 | -1.6  |
| 1588.7  | 8  | P27816       | K.DMSPLETETMALG DMSPLETETMALG                       | 0.28   | 0.002    | -0.002   | 0 | 33.16 | 20 | 85  | 5  | 1152 | -1.45 |
| 1684.5  | 5  | P27816       | K.KCSLPAEEDSVEK.I KC[160.0307][166.9984]LPAE        | -0.186 | 0.009    | -0.003   | 1 | 28.36 | 20 | 122 | 9  | 1152 | -2.02 |
| 1508.7  | 8  | P27824       | K.AEEDILNRSR.N AEEDILNRS[166.9984]R                 | -0.107 | 0.007    | -0.002   | 1 | 29.29 | 20 | 221 | 15 | 592  | -1.54 |
| 2188.9  | 10 | P27824       | K.QKSAEEDGGTQK QKS[166.9984]DAEEDGGTQK              | 1.178  | 0.003    | -0.004   | 1 | 31.18 | 19 | 221 | 15 | 592  | -1.95 |
| 1932.7  | 9  | P27824       | K.SDAEEDGGTQK SDAEEDGGTQK[166.9984]QK               | 1.978  | 9.90E-08 | -0.004   | 0 | 77.08 | 20 | 221 | 15 | 592  | -2.09 |
| 2268.8  | 9  | P27824       | K.QKSAEEDGGTQK QKS[166.9984]DAEEDGGTQK              | 0.414  | 0.002    | -0.005   | 1 | 31.5  | 17 | 221 | 15 | 592  | -2.11 |
| 1932.7  | 13 | P27824       | K.SDAEEDGGTQK SDAEEDGGTQK[166.9984]QK               | 1.978  | 1.10E-09 | -0.005   | 0 | 96.72 | 19 | 221 | 15 | 592  | -2.55 |
| 2108    | 15 | P27824       | K.IPDPEAVKPDWDD IPDPEAVKPDWDEDAPAK                  | 0.21   | 0.031    | -0.004   | 1 | 23.45 | 21 | 174 | 14 | 592  | -2.06 |
| 1088.5  | 7  | P27824       | K.AEEDILNRS AEEDILNRS                               | 1.33   | 2.70E-04 | -0.004   | 0 | 44.52 | 21 | 239 | 14 | 592  | -3.22 |
| 814.33  | 4  | P28290       | R.MPSFR.S MPS[166.9984]PFR                          | -0.604 | 0.02     | -0.002   | 0 | 25.32 | 21 | 25  | 5  | 1259 | -1.87 |
| 2975.3  | 23 | P28290       | R.TGVSQTPPDLESSEI TGS[166.9984]VQTPPDLESSEV         | 1.85   | 7.30E-04 | -0.005   | 0 | 38.86 | 20 | 102 | 7  | 1259 | -1.65 |
| 3055.3  | 18 | P28290       | R.TGVSQTPPDLESSEI TGS[166.9984]VQTPPDLESSEV         | 0.099  | 0.039    | -0.009   | 0 | 21.32 | 20 | 29  | 3  | 1259 | -2.96 |
| 3055.3  | 16 | P28290       | R.TGVSQTPPDLESSEI TGS[166.9984]VQTPPDLESSEV         | 0.533  | 0.014    | -0.009   | 0 | 25.68 | 20 | 39  | 6  | 1259 | -2.96 |
| 2975.3  | 12 | P28290       | R.TGVSQTPPDLESSEI TGSVQTPPDLESSEV[166.9984]         | 0.115  | 0.038    | 3.00E-04 | 0 | 21.5  | 20 | 39  | 6  | 1259 | 0.1   |
| 3055.3  | 17 | P28290       | R.TGVSQTPPDLESSEI TGSVQTPPDLESSEV[166.9984]         | 0.469  | 0.016    | -0.009   | 0 | 25.12 | 20 | 38  | 4  | 1259 | -2.96 |
| 2975.3  | 13 | P28290       | R.TGVSQTPPDLESSEI TGSVQTPPDLESSEV[166.9984]         | 1.608  | 0.001    | 3.00E-04 | 0 | 36.42 | 20 | 73  | 10 | 1259 | 0.1   |
| 1558.7  | 9  | P28290       | R.SQSLPTLLSPVR.V SQS[166.9984]LPTLLS[166.99         | -0.534 | 0.02     | -0.002   | 0 | 25.97 | 21 | 102 | 7  | 1259 | -1.32 |
| 2063.8  | 18 | P28290       | K.SGQDFPQCNTIEN SGS[166.9984]QDFPQC[160.03          | -0.799 | 0.032    | -0.005   | 0 | 23.37 | 21 | 40  | 8  | 1259 | -2.37 |
| 1713.8  | 11 | P28290       | R.TPLGASLDEQSSSTL TPLGAS[166.9984]LDEQSSSTL         | 2.735  | 2.30E-06 | -0.004   | 0 | 63.83 | 20 | 102 | 7  | 1259 | -2.24 |
| 1054.5  | 5  | P28370       | K.SPTSLNLMK.L SPTS[166.9984]PLNMK                   | -0.345 | 0.011    | -0.002   | 0 | 25.91 | 19 | 26  | 1  | 1054 | -2.32 |
| 1463.7  | 8  | P28715       | R.NAPAAVDEGSISPR NAPAAVDEGSIS[166.9984]PR           | 2.669  | 1.20E-05 | -0.003   | 0 | 58.05 | 21 | 58  | 2  | 1186 | -2.04 |
| 1603.6  | 8  | P28715       | K.FDSSLSSDDETK.C FDSSLSS[166.9984][166.9984]        | -0.147 | 0.007    | -0.003   | 0 | 26.79 | 18 | 87  | 4  | 1186 | -2    |
| 1146.5  | 7  | P28715       | K.EPDATPPSPR.T EPDATPPS[166.9984]R                  | -0.431 | 0.013    | -0.004   | 0 | 24.95 | 19 | 87  | 4  | 1186 | -3.91 |
| 1523.6  | 13 | P28715       | K.FDSSLSSDDETK.C FDSSLSS[166.9984]SDDETK            | 1.321  | 2.30E-04 | -0.003   | 0 | 43.5  | 20 | 112 | 4  | 1186 | -2.22 |
| 1413.6  | 7  | P29317       | R.LPSTGSEGVFPR.T LPS[166.9984]TSGSEGVFPR            | -0.607 | 0.022    | -0.003   | 0 | 25.19 | 21 | 25  | 3  | 976  | -1.97 |
| 1996.8  | 13 | P29323       | R.FLEDDTSDPTYSAL FLEDDTSDPT[181.014]YTSALG          | 0.288  | 0.003    | -0.004   | 0 | 34.17 | 21 | 34  | 2  | 1055 | -1.82 |
| 1996.8  | 9  | P29323       | R.FLEDDTSDPTYSAL FLEDDTSDPT[166.9984]DPTYSALG       | 2.08   | 4.40E-06 | -0.004   | 0 | 62.36 | 21 | 62  | 1  | 1055 | -1.82 |
| 4300.9  | 10 | P29590       | K.AVSPPHLDGPPSPR AVS[166.9984]PHLDGPPS[166.9        | 0.038  | 0.017    | -0.007   | 1 | 24.59 | 19 | 34  | 5  | 882  | -1.7  |
| 1586.7  | 12 | P29590       | K.AVSPPHLDGPPSPR AVS[166.9984]PHLDGPPS[166.9        | 0.919  | 0.006    | -0.003   | 0 | 28.59 | 19 | 34  | 5  | 882  | -2.01 |
| 2747.2  | 21 | P29590       | R.QPSPPSPTRAPA.P QPS[166.9984]PSPS[166.9984]        | 0.571  | 0.014    | -0.003   | 1 | 26.06 | 20 | 40  | 5  | 882  | -1.92 |
| 1503.7  | 13 | P29692       | R.ATAPQTHVSPMR ATAPQTHV[166.9984]PMR                | 0.611  | 0.013    | -0.003   | 0 | 26.51 | 20 | 163 | 7  | 281  | -1.28 |
| 2989.2  | 20 | P29692       | K.KPATPAEDDEDDI.K PATPAEDDEDDIDLFGS[166.95          | 1.41   | 1.80E-04 | -0.002   | 1 | 44.17 | 19 | 163 | 7  | 281  | -0.73 |
| 3069.1  | 24 | P29692       | K.KPATPAEDDEDDI.K PATPAEDDEDDIDLFGS[166.95          | 1.41   | 1.00E-05 | -0.006   | 1 | 53.65 | 16 | 163 | 7  | 281  | -1.89 |
| 2861.1  | 19 | P29692       | K.PATPAEDDEDDI.K PATPAEDDEDDIDLFGS[166.95           | 1.41   | 1.30E-04 | -0.006   | 0 | 44.36 | 18 | 163 | 7  | 281  | -2.1  |
| 1702.8  | 14 | P29966       | K.GEPAAAAEAGAA.GEPAAAAEAGAS[166.9984]P              | 2.732  | 4.90E-06 | -0.005   | 0 | 61.57 | 21 | 184 | 12 | 332  | -2.95 |
| 1580.6  | 7  | P29966       | K.AEDGATPSPNETP AEDGATPS[166.9984]PNETPK            | -0.59  | 0.019    | -0.003   | 0 | 24.46 | 20 | 184 | 12 | 332  | -2    |
| 1580.6  | 7  | P29966       | K.AEDGATPSPNETP AEDGATPSNET[181.014]PK              | -0.213 | 0.008    | -0.002   | 0 | 28.23 | 20 | 184 | 12 | 332  | -1.18 |
| 1864.11 | 11 | P29966       | K.GEAAERPEEAAV.GEAAERPEEAAVSS[166.9984]             | 2.682  | 1.10E-05 | -0.004   | 1 | 59.18 | 22 | 184 | 12 | 332  | -2.37 |
| 3075.2  | 23 | P29966       | K.EAPAEGEAAEGSP EAPAEGEAAEGS[166.9984]PT            | 0.591  | 0.012    | -0.006   | 0 | 26.31 | 20 | 184 | 12 | 332  | -1.97 |
| 2995.3  | 40 | P29966       | K.EAPAEGEAAEGSP EAPAEGEAAEGS[166.9984]PT            | 1.127  | 0.004    | -0.006   | 0 | 31.67 | 20 | 184 | 12 | 332  | -1.95 |
| 2995.3  | 21 | P29966       | K.EAPAEGEAAEGSP EAPAEGEAAEGSPT[181.014]A            | 0.282  | 0.028    | -0.006   | 0 | 23.22 | 20 | 184 | 12 | 332  | -1.95 |
| 2995.3  | 25 | P29966       | K.EAPAEGEAAEGSP EAPAEGEAAEGSPTAAEGEAA#              | 1.496  | 0.002    | -0.003   | 0 | 35.32 | 20 | 186 | 9  | 332  | -0.88 |
| 1580.6  | 8  | P29966       | K.AEDGATPSPNETP AEDGATPS[166.9984]NETPK             | 1.229  | 2.80E-04 | -0.002   | 0 | 42.62 | 20 | 206 | 11 | 332  | -1.18 |
| 1864.12 | 12 | P29966       | K.GEAAERPEEAAV.GEAAERPEEAAVSS[166.95                | -0.507 | 0.017    | -0.004   | 1 | 27.19 | 22 | 139 | 10 | 332  | -2.37 |
| 1864.19 | 19 | P29966       | K.GEAAERPEEAAV.GEAAERPEEAAVSS[166.9984]             | 1.817  | 7.40E-04 | -0.003   | 1 | 40.52 | 22 | 206 | 11 | 332  | -1.45 |
| 2995.3  | 32 | P29966       | K.EAPAEGEAAEGSP EAPAEGEAAEGSPTAAEGEAA#              | 1.472  | 0.001    | -0.003   | 0 | 36.3  | 20 | 206 | 11 | 332  | -0.88 |
| 1680.7  | 18 | P29966       | K.EEPAAGSAGASP EEPAAAGSAGAS[166.9984]SA             | 0.41   | 0.002    | -0.004   | 0 | 34.43 | 20 | 206 | 11 | 332  | -2.08 |
| 3062.4  | 24 | P29966       | K.EELQANGSPAADA.EELQANGSPAADKEEPAAGSG               | 1.668  | 3.20E-04 | -0.008   | 1 | 42.37 | 20 | 186 | 9  | 332  |       |



|         |    |              |                    |                                     |          |        |          |           |   |       |    |     |    |      |       |
|---------|----|--------------|--------------------|-------------------------------------|----------|--------|----------|-----------|---|-------|----|-----|----|------|-------|
| 2238.9  | 10 | P35221       | R.TPEELDDSDFFETDI  | TPEELDDSD[166.9984]DFETEDFC         | 2        | 1.978  | 7.80E-10 | -0.005    | 0 | 97.72 | 19 | 147 | 4  | 906  | -2.07 |
| 2238.9  | 14 | P35221       | R.TPEELDDSDFFETDI  | T[181.014]TPEELDDSDFFETEDFC         | 3        | 1.41   | 7.80E-04 | -0.003    | 0 | 38.04 | 19 | 147 | 4  | 906  | -1.22 |
| 2562    | 20 | P35221       | R.TPEELDDSDFFETDI  | TPEELDDSD[166.9984]DFETEDFC         | 3        | -0.003 | 0.048    | -0.004    | 1 | 19.33 | 19 | 162 | 6  | 906  | -1.67 |
| 2142    | 22 | P35221,P2623 | R.SRTSVQTEDDQLIA   | SRTSV[166.9984]VQTEDDQLIAGQ         | 3        | 1.303  | 0.003    | -0.005    | 1 | 34.43 | 21 | 147 | 3  |      | -2.46 |
| 2142    | 13 | P35221,P2623 | R.SRTSVQTEDDQLIA   | SRT[181.014]VQTEDDQLIAGQ            | 2        | 0.114  | 0.004    | -0.005    | 1 | 32.5  | 21 | 147 | 3  |      | -2.55 |
| 2142    | 10 | P35221,P2623 | R.SRTSVQTEDDQLIA   | SRTSVQ[181.014]EDDQLIAGQ            | 3        | 0.64   | 0.012    | -0.005    | 1 | 27.83 | 21 | 162 | 3  |      | -2.46 |
| 1898.8  | 12 | P35221,P2623 | R.TSVQTEDDQLIAGC   | T[181.014]VQTEDDQLIAGQSA            | 2        | 1.313  | 2.60E-04 | -0.004    | 0 | 45.46 | 22 | 197 | 3  |      | -1.97 |
| 2401.9  | 10 | P35251       | R.QDPVTVYSEETDEDI  | QDPVTVY[166.9984]ETDEEDDI           | 2        | 2.035  | 5.30E-05 | -0.008    | 0 | 49.61 | 19 | 91  | 4  | 1148 | -3.32 |
| 2015.8  | 9  | P35251       | R.IYDSDSESEETLQVI  | IYDSD[166.9984]DS[166.9984]I        | 2        | 2.085  | 4.60E-06 | -0.005    | 0 | 61.18 | 20 | 91  | 4  | 1148 | -2.61 |
| 2015.8  | 9  | P35251       | R.IYDSDSESEETLQVI  | IYDSD[166.9984]DSES[166.9984]       | 2        | -0.283 | 0.011    | -0.005    | 0 | 27.53 | 20 | 38  | 4  | 1148 | -2.61 |
| 1931.7  | 10 | P35268       | R.YFQJNQDEEEEEEI   | YFQJNQDEEEEEEI                      | 2        | 1.978  | 1.70E-05 | -0.004    | 0 | 53.3  | 18 | 53  | 1  | 128  | -2.06 |
| 1957.8  | 14 | P35579       | K.GAGDGSDEEVGDK    | GAGDGS[166.9984]DEEVGDKA            | 2        | -0.272 | 0.01     | -0.003    | 1 | 25.64 | 18 | 26  | 3  | 1960 | -1.46 |
| 1074.5  | 7  | P35580       | R.GGPISFSSSR.S     | GGPISFSSSR[166.9984]R               | 2        | 0.022  | 0.005    | -0.002    | 0 | 28.53 | 18 | 29  | 5  | 1976 | -1.64 |
| 1266.9  | 11 | P35580       | R.QLHLEGASLELSDI   | QLHLEGASLELSDI[166.9984]DDD         | 3        | 1.483  | 0.002    | -0.002    | 0 | 35.18 | 20 | 35  | 1  | 1976 | -1.02 |
| 2727.3  | 18 | P35606       | R.STAQQLDQKPSAF    | STAQQLDQKPSAF[166.9984]PT           | 3        | 1.41   | 7.70E-04 | -0.007    | 1 | 37.69 | 19 | 38  | 3  | 906  | -2.49 |
| 1433.6  | 11 | P35611       | R.SPGSVPGVGTGSPG   | SPGS[166.9984]PVGEGTGSPPK           | 2        | 1.154  | 3.30E-04 | -0.003    | 0 | 42.9  | 21 | 46  | 3  | 737  | -1.83 |
| 5316.3  | 8  | P35611       | K.EEEAHRPSPTEAP    | EEEAHRPSPTEAP[166.9984]PTEAPTE      | 4        | 0.038  | 0.012    | -0.002    | 1 | 19.95 | 17 | 46  | 3  | 737  | -0.36 |
| 5316.3  | 28 | P35611       | K.EEEAHRPSPTEAP    | EEEAHRPSPTEAP[166.9984]PTEAPTE      | 4        | 0.319  | 0.012    | -0.002    | 1 | 23.96 | 17 | 24  | 1  | 737  | -0.36 |
| 2573.1  | 23 | P35612       | K.ETAPEEPGSPAKAI   | ETAPEEPGSPAKAI[166.9984]PAKS        | 16       | 0.16   | 0.037    | -0.007    | 1 | 20.95 | 19 | 21  | 2  | 726  | -2.91 |
| 1831.8  | 9  | P35658       | K.SPGSTPTTPTTSSQAI | SPGST[181.014]PT[181.014]TP         | 2        | -0.175 | 0.007    | -0.004    | 0 | 29.58 | 21 | 30  | 1  | 2090 | -2.07 |
| 1831.8  | 7  | P35658       | K.SPGSTPTTPTTSSQAI | S[166.9984]PGSTPTTPTTSS[166.2       | 2        | -0.084 | 0.006    | -0.004    | 0 | 30.52 | 21 | 31  | 3  | 2090 | -2.07 |
| 1569.7  | 9  | P35658       | R.SAQGSSPVPMVMQI   | SAQGSS[166.9984]PVPMVMQI            | 2        | -0.415 | 0.013    | -9.00E-04 | 0 | 26.14 | 20 | 39  | 6  | 2090 | -0.6  |
| 3359.2  | 7  | P35659       | K.EPEMPGPRESEEEI   | EPEMPGPRESEEEI[166.9984]EEEEI       | 3        | 1.333  | 0.002    | -0.002    | 1 | 29.73 | 16 | 30  | 1  | 375  | -2.39 |
| 2047.7  | 15 | P35659       | K.KESEEDSSDDEPLI   | KESEI[166.9984]EDS[166.9984]2       | 2        | -0.219 | 0.009    | -0.004    | 1 | 24.1  | 16 | 36  | 2  | 375  | -2.15 |
| 2047.7  | 14 | P35659       | K.KESEEDSSDDEPLI   | KESEI[166.9984]ESED[166.9984]2      | 2        | -0.352 | 0.012    | -0.004    | 1 | 22.84 | 16 | 26  | 4  | 375  | -2.15 |
| 1839.6  | 5  | P35659       | K.KESEEDSSDDEPLI   | KESEI[166.9984]EDS[166.9984]S       | 166.9984 | -0.563 | 0.018    | -0.004    | 0 | 21.59 | 17 | 42  | 2  | 375  | -2.14 |
| 2202.9  | 18 | P35680       | R.LSGDEGSEDGDYI    | LSGDEGS[166.9984]EDGDYD1            | 2        | 0.259  | 0.003    | -0.006    | 0 | 33.88 | 21 | 81  | 5  | 557  | -2.77 |
| 1791.6  | 6  | P35680       | K.LETLPLSPGSAEPI   | LETLPLS[166.9984]PGSAEPI            | 2        | 0.355  | 0.002    | -0.004    | 0 | 34.94 | 21 | 38  | 4  | 557  | -2.06 |
| 2416    | 7  | P35680       | K.GRLSGDEGSEDGDI   | GRLSGDEGS[166.9984]EDGDD1           | 3        | 1.35   | 0.002    | -0.005    | 1 | 34.84 | 21 | 38  | 6  | 557  | -1.94 |
| 2496    | 9  | P35680       | K.GRLSGDEGSEDGDI   | GRLS[166.9984]GDEGSEDGDD1           | 2        | -0.806 | 0.032    | -0.002    | 1 | 22.2  | 20 | 22  | 1  | 557  | -0.8  |
| 1163.6  | 6  | P36578       | R.IKSPHQR.A        | IKS[166.9984]PEIQR                  | 2        | -0.349 | 0.011    | -0.002    | 1 | 26.77 | 20 | 27  | 2  | 427  | -2.03 |
| 1608.9  | 9  | P36578       | R.IEVEPELPLVDEK.   | IEVEPELPLVDEK                       | 2        | -0.928 | 0.042    | -0.002    | 0 | 17.94 | 17 | 18  | 1  | 427  | -1.03 |
| 1640.8  | 5  | P36776       | R.QLEVEPEPEAENK    | QLEVEPEPEAENK                       | 2        | -0.699 | 0.03     | -0.003    | 0 | 23.23 | 20 | 23  | 3  | 959  | -2.39 |
| 2164.8  | 15 | P36956       | R.GSGSGSGSDSEPI    | GSGSGS[166.9984]GSDSEPD2            | 2        | 0.074  | 0.005    | -0.005    | 0 | 29.03 | 18 | 29  | 3  | 1147 | -2.38 |
| 2789.2  | 25 | P37275       | K.NNDQPQSANANEF    | NNDQPQSANANEFQDSTVNLQ3              | 3        | 2.013  | 4.50E-04 | -0.008    | 0 | 41.53 | 21 | 42  | 5  | 1124 | -2.54 |
| 2789.2  | 12 | P37275       | K.NNDQPQSANANEF    | NNDQPQSANANEFQDSTVNLQ3              | 3        | 0.005  | 0.046    | -0.008    | 0 | 21.48 | 21 | 21  | 3  | 1124 | -2.74 |
| 2123.9  | 21 | P37275       | K.MQAGQ[SVQSESP    | MQAGQ[SVQSESPSS[166.9984.2          | 2        | 0.58   | 0.001    | -0.005    | 0 | 37.13 | 21 | 51  | 3  | 1124 | -2.34 |
| 966.41  | 6  | P38159       | R.GLPPSMER.G       | GLPPS[166.9984]MER                  | 2        | -0.707 | 0.028    | -0.002    | 0 | 22.24 | 19 | 49  | 8  | 391  | -1.78 |
| 1515.7  | 9  | P38159       | K.VEQATKPSFESGR    | FVEQATKPS[166.9984]FESGR            | 2        | -0.027 | 0.006    | -0.003    | 1 | 31.02 | 21 | 68  | 9  | 391  | -2.18 |
| 929.41  | 4  | P38159,Q96E1 | R.DVYLSPR.D        | DVYLS[166.9984]PR                   | 2        | -0.673 | 0.026    | -0.002    | 0 | 22.67 | 19 | 44  | 4  |      | -2.59 |
| 1695.7  | 7  | P38159,Q96E1 | R.DVYLSPRDDGYSTK   | DVYLS[166.9984]PRDDGYSTK            | 2        | 0.034  | 0.005    | -0.004    | 1 | 29.3  | 19 | 44  | 4  |      | -2.1  |
| 1861.7  | 7  | P38432       | R.AFQLEEGEETPDIC   | AFQLEEGEET[181.014]EPDC[16          | 2        | 0.145  | 0.004    | -0.005    | 0 | 29.81 | 18 | 54  | 4  | 576  | -2.55 |
| 2017.8  | 9  | P38432       | R.AFQLEEGEETPDIC   | AFQLEEGEET[181.014]EPDC[1           | 2        | 1.09   | 4.30E-04 | -0.005    | 1 | 41.26 | 20 | 54  | 4  | 576  | -2.54 |
| 1134.6  | 7  | P39019       | K.DVNOQEFV.R       | DVNOQEFV                            | 2        | 0.042  | 0.004    | -0.002    | 0 | 31.81 | 21 | 32  | 1  | 145  | -2.04 |
| 1342.6  | 9  | P39023       | K.NNASTDYDLSDK     | NNASTDYDLSDK                        | 2        | 2.732  | 3.40E-06 | -0.003    | 0 | 61.76 | 20 | 62  | 1  | 403  | -2.1  |
| 5982.5  | 29 | P39060       | R.PWAPITGSPVPPS    | PWAPIT[181.014]GSP[166.998          | 5        | -0.294 | 0.049    | -0.015    | 1 | 13.9  | 13 | 14  | 4  | 1754 | -2.48 |
| 1976.9  | 7  | P39880       | K.SLTELQPCPIEIA    | SLTELQPCPIEIA[181.014]ELVQPC[160.03 | 2        | -0.152 | 0.008    | -0.002    | 0 | 28.74 | 20 | 31  | 3  | 1505 | -0.83 |
| 3609.5  | 17 | P39880       | R.HSSVSDSQCEPPS    | HSS[166.9984]VSDSQPC[160.0          | 3        | 1.655  | 1.50E-05 | -0.007    | 0 | 56.32 | 20 | 53  | 4  | 1505 | -2.78 |
| 3564.6  | 28 | P40222       | K.SSPGQPEAGPEGAC   | SS[166.9984]PGQPEAGPEGAQI           | 3        | 0.006  | 0.046    | -0.006    | 1 | 21.42 | 21 | 21  | 3  | 546  | -1.02 |
| 1486.4  | 4  | P40222       | R.RPEGGAQAPSPFP    | RPEGGAQAPSP[166.9984]PR             | 3        | 0.377  | 0.021    | -0.002    | 1 | 25.12 | 21 | 43  | 3  | 546  | -1.08 |
| 2060.9  | 11 | P40818       | K.RYSVSPDITQAIQEE  | RSYSV[166.9984]PDITQAIQEE           | 3        | 1.172  | 0.004    | -0.004    | 1 | 33.12 | 21 | 33  | 7  | 1118 | -1.78 |
| 2060.9  | 11 | P40818       | K.RYSVSPDITQAIQEE  | RSYSV[166.9984]YSSPDITQAIQEE        | 3        | 1.659  | 0.001    | -0.004    | 1 | 37.95 | 21 | 38  | 3  | 1118 | -1.78 |
| 1976.10 | 10 | P40855       | K.NATDLQNSMSEEEI   | NATDLQNS[166.9984]MSEEL             | 2        | 2.732  | 4.60E-06 | -0.004    | 0 | 61.11 | 20 | 61  | 1  | 299  | -1.98 |
| 3921.5  | 8  | P41236       | K.IDEPSTPYHMMGGI   | IDEPST[181.014]PYHMMGGD             | 3        | 0.206  | 0.033    | -0.003    | 0 | 20.46 | 18 | 28  | 3  | 205  | -0.86 |
| 3921.5  | 20 | P41236       | K.IDEPSTPYHMMGGI   | IDEPSTPYHMMGGDDEDAC[160             | 3        | 0.755  | 0.009    | -0.003    | 0 | 25.95 | 18 | 28  | 3  | 205  | -0.86 |
| 3921.5  | 28 | P41236       | K.IDEPSTPYHMMGGI   | IDEPSTPYHMMGGDDEDAC[160             | 3        | 0.675  | 0.011    | -0.003    | 0 | 25.11 | 18 | 50  | 2  | 205  | -0.86 |
| 4001.5  | 12 | P41236       | K.IDEPSTPYHMMGGI   | IDEPSTPY[243.0297]HMMGGD            | 3        | 1.668  | 1.90E-04 | -0.002    | 0 | 42.13 | 17 | 50  | 2  | 205  | -0.5  |
| 3921.5  | 7  | P41236       | K.IDEPSTPYHMMGGI   | IDEPSTPY[166.9984]MMGGD             | 3        | 0.344  | 0.025    | -0.003    | 0 | 21.79 | 18 | 32  | 2  | 205  | -0.86 |
| 4001.5  | 7  | P41236       | K.IDEPSTPYHMMGGI   | IDEPSTPYHMMGGDDEDAC[160             | 3        | 1.022  | 0.005    | -0.002    | 0 | 27.57 | 17 | 32  | 2  | 205  | -0.5  |
| 4001.5  | 7  | P41236       | K.IDEPSTPYHMMGGI   | IDEPSTPY[166.9984]MMGGD             | 3        | 1.628  | 0.001    | -0.002    | 0 | 33.63 | 17 | 73  | 7  | 205  | -0.5  |
| 4001.5  | 7  | P41236       | K.IDEPSTPYHMMGGI   | IDEPST[181.014]PYHMMGGD             | 3        | 1.405  | 0.002    | -0.002    | 0 | 31.4  | 17 | 73  | 7  | 205  | -0.5  |
| 1727.11 | 11 | P42166,P4212 | R.SSTPLTSSSAENT    | S[166.9984]TPLTSSSAENR              | 2        | -0.449 | 0.015    | -0.004    | 0 | 26.8  | 21 | 243 | 3  |      | -2.62 |
| 2595.1  | 12 | P42166,P4212 | R.EQGTESRSSTPLT    | EQGTES[166.9984]RS[166.998          | 3        | 0.526  | 0.017    | -0.007    | 1 | 25.59 | 20 | 207 | 3  |      | -2.54 |
| 1727.13 | 13 | P42166,P4212 | R.SSTPLTSSSAENT    | SSTPLTSS[166.9984]SAENR             | 3        | 0.278  | 0.003    | -0.004    | 0 | 34    | 21 | 204 | 3  |      | -2.62 |
| 2139.8  | 13 | P42167       | R.QNGSNDSDRYSDN    | QNGSNDSDRYSDN[166.9984]DNEI         | 3        | 0.028  | 0.045    | -0.002    | 1 | 18.63 | 18 | 225 | 12 | 454  | -0.81 |
| 2650.12 | 12 | P42167,P4212 | K.GPPDFSSDEERPTI   | GPPDFSSDEERPT[181.014]PVI           | 3        | 1.716  | 8.90E-04 | -0.006    | 1 | 39.56 | 22 | 240 | 3  |      | -2.18 |
| 2730.1  | 21 | P42167,P4212 | K.GPPDFSSDEERPTI   | GPPDFSS[166.9984]DEERPT1            | 3        | 1.613  | 0.001    | -0.006    | 1 | 37.53 | 21 | 240 | 3  |      | -2.3  |
| 2650.2  | 20 | P42167,P4212 | K.GPPDFSSDEERPTI   | GPPDFSS[166.9984]SDEERPTA           | 3        | 2.572  | 9.90E-06 | -0.005    | 1 | 59.12 | 22 | 240 | 3  |      | -2.06 |
| 2810.1  | 20 | P42167,P4212 | K.GPPDFSSDEERPTI   | GPPDFSS[166.9984]S[166.9984]        | 3        | 1.41   | 4.00E-05 | -0.006    | 1 | 51.88 | 20 | 240 | 3  |      | -2.14 |
| 2730.1  | 25 | P42167,P4212 | K.GPPDFSSDEERPTI   | GPPDFSS[166.9984]S[166.9984]        | 3        | 2.572  | 6.70E-06 | -0.005    | 1 | 60.64 | 21 | 240 | 3  |      | -1.68 |
| 1727.9  | 9  | P42167,P4212 | R.SSTPLTSSSAENT    | SST[181.014]PLTSSSAENR              | 2        | -0.061 | 0.006    | -0.004    | 0 | 30.75 | 21 | 240 | 3  |      | -2.16 |
| 2595.1  | 6  | P42167,P4212 | R.EQGTESRSSTPLT    | EQGTESRS[166.9984]T[181.01          | 3        | #####  | 0.047    | -0.005    | 1 | 21.36 | 21 | 273 | 3  |      | -1.96 |
| 2730.1  | 19 | P42167,P4212 | K.GPPDFSSDEERPTI   | GPPDFSS[166.9984]SDEERPT1           | 3        | 1.095  | 0.004    | -0.006    | 1 | 32.3  | 21 | 273 | 3  |      | -2.3  |
| 1138.5  | 5  | P42345       | R.TLDQSPELR.S      | TLDQS[166.9984]PELR                 | 2        | -0.924 | 0.042    | -0.002    | 0 | 18.98 | 18 | 19  | 2  | 2549 | -1.74 |
| 1752.8  | 15 | P42566       | K.LNDPFPQPPGNDSP   | LNDPFPQPPGNDSP[166.9984]PK          | 2        | -0.463 | 0.014    | -0.003    | 0 | 26.73 | 21 | 27  | 2  | 896  | -1.94 |
| 3673.2  | 22 | P42568       | K.DLHSDNNEEVEDS    | DLHS[166.9984]DDNEEES[166.3         | 2        | 1.29   | 0.002    | -0.003    | 1 | 29.26 | 16 | 29  | 3  | 568  | -0.82 |
| 1293.6  | 7  | P42677       | K.DLLHPSPEEK.R     | DLLHPSPEEK                          | 2        | -0.678 | 0.023    | -0.002    | 0 | 25.53 | 22 | 28  | 3  | 84   | -1.85 |
| 1373.6  | 7  | P42677       | K.DLLHPSPEEK.R     | DLLHPS[166.9984]PEEK                | 2        | -0.842 | 0.035    | -0.003    | 0 | 22.8  | 21 | 48  | 3  | 84</ |       |

|        |    |        |                   |                                    |   |        |          |        |   |       |    |     |    |      |       |
|--------|----|--------|-------------------|------------------------------------|---|--------|----------|--------|---|-------|----|-----|----|------|-------|
| 1228.6 | 11 | P46087 | K.GPQPPTVSPIR.S   | GPQPPTV[S166.9984]PIR              | 2 | -0.92  | 0.04     | -0.003 | 0 | 22.19 | 21 | 45  | 4  | 812  | -2.17 |
| 3570.4 | 9  | P46087 | R.EAAGIQWSEETE    | EAAGIQW[S166.9984]EETE[1]          | 3 | 0.928  | 0.006    | -0.007 | 1 | 27.63 | 18 | 86  | 4  | 812  | -2.07 |
| 2202.9 | 8  | P46100 | K.QSETVDQNSDSDEI  | QSETVDQNS[S166.9984]DEM            | 2 | 2.016  | 5.10E-05 | -0.004 | 0 | 50.52 | 20 | 171 | 11 | 2492 | -1.99 |
| 4050.7 | 12 | P46100 | K.YVESDDEKPLDDEI  | YVES[S166.9984]DDEKPLDDEI          | 4 | 0.038  | 0.005    | -0.013 | 1 | 28.57 | 18 | 171 | 11 | 2492 | -3.11 |
| 2202.9 | 13 | P46100 | K.QSETVDQNSDSDEI  | QSETVDQNS[S166.9984]DSDDEM         | 3 | 0.561  | 0.014    | -0.003 | 0 | 26.01 | 20 | 171 | 11 | 2492 | -1.3  |
| 1410.5 | 6  | P46100 | K.LTVSDGSEGEK.K   | LTVS[S166.9984]DGES[S166.9984]     | 2 | -0.743 | 0.029    | -0.003 | 0 | 18.93 | 16 | 171 | 11 | 2492 | -1.99 |
| 2567   | 15 | P46100 | R.RPTETNPVTSNSDEI | RPTETNPVTS[S166.9984]NS[166]       | 3 | 0.888  | 0.006    | -0.006 | 1 | 28.28 | 19 | 171 | 11 | 2492 | -2.39 |
| 2487   | 23 | P46100 | R.RPTETNPVTSNSDEI | RPTETNPVTS[S166.9984]DEEC          | 3 | 2.495  | 1.70E-04 | -0.005 | 1 | 45.35 | 20 | 171 | 11 | 2492 | -2.05 |
| 1415.7 | 7  | P46100 | K.LTPVLSNSPIK.G   | LTPVLS[S166.9984]LSNS[S166.998]    | 2 | -0.295 | 0.011    | -0.003 | 0 | 28.41 | 21 | 171 | 11 | 2492 | -1.81 |
| 1854.7 | 10 | P46100 | K.ATSSSNPSPAPDVA  | ATSS[S166.9984]NPSS[S166.998]      | 2 | 0.475  | 0.002    | -0.004 | 0 | 33.06 | 18 | 205 | 17 | 2492 | -2.15 |
| 1350.5 | 7  | P46100 | R.ETFSSAEGTVDK.D  | ETFSS[S166.9984]AEGTVDK            | 2 | 0.277  | 0.003    | -0.003 | 0 | 32.1  | 19 | 167 | 19 | 2492 | -2.06 |
| 2282.9 | 10 | P46100 | K.QSETVDQNSDSDEI  | QSETVDQNS[S166.9984]DS[166]        | 2 | -0.22  | 0.009    | -0.003 | 0 | 27.06 | 19 | 147 | 17 | 2492 | -1.36 |
| 4050.7 | 14 | P46100 | K.YVESDDEKPLDDEI  | YVES[S166.9984]DDEKPLDDEI          | 4 | 0.206  | 0.018    | -0.013 | 1 | 22.66 | 18 | 167 | 19 | 2492 | -3.11 |
| 1335.7 | 6  | P46100 | K.LTPVLSNSPIK.G   | LTPVLSNS[S166.9984]PIK             | 2 | 1.595  | 1.20E-04 | -0.002 | 0 | 46.21 | 20 | 147 | 19 | 2492 | -1.9  |
| 1774.7 | 10 | P46100 | K.ATSSSNPSPAPDVA  | ATSSSNPSS[S166.9984]PAPD           | 2 | -0.275 | 0.009    | -0.003 | 0 | 27.58 | 20 | 167 | 19 | 2492 | -1.78 |
| 1350.5 | 8  | P46100 | R.ETFSSAEGTVDK.D  | ETFSS[S166.9984]AEGTVDK            | 2 | 2.107  | 4.00E-05 | -0.003 | 0 | 50.43 | 19 | 176 | 13 | 2492 | -2.06 |
| 1854.7 | 9  | P46100 | K.ATSSSNPSPAPDVA  | ATS[S166.9984]SSNPSS[S166.998]     | 2 | 0.85   | 7.40E-04 | -0.004 | 0 | 36.89 | 18 | 223 | 17 | 2492 | -2.15 |
| 1410.5 | 5  | P46100 | K.LTVSDGSEGEK.K   | LTV[S166.9984]VSDGES[S166.9984]    | 2 | -0.465 | 0.016    | -0.003 | 0 | 21.71 | 16 | 176 | 13 | 2492 | -1.99 |
| 2564.1 | 19 | P46379 | R.ASPPEQRENASAP   | ASPEQRENAS[S166.9984]PAPG          | 3 | 0.892  | 0.006    | -0.006 | 1 | 30.28 | 21 | 30  | 1  | 1132 | -2.35 |
| 2644.1 | 17 | P46379 | R.ASPPEQRENASAP   | AS[S166.9984]PEQRENASPAPG          | 3 | 0.115  | 0.042    | -0.005 | 1 | 21.5  | 20 | 22  | 2  | 1132 | -1.99 |
| 2644.1 | 19 | P46379 | R.ASPPEQRENASAP   | AS[S166.9984]PEQRENASPAPG          | 3 | 0.169  | 0.037    | -0.005 | 1 | 22.09 | 20 | 26  | 2  | 1132 | -1.99 |
| 1774.6 | 10 | P46821 | K.GAEQSEEADEED    | GAEQ[S166.9984]EEEADEEDK           | 2 | 1.978  | 8.20E-06 | -0.001 | 0 | 53.74 | 15 | 569 | 44 | 2468 | -0.8  |
| 2823.2 | 15 | P46821 | R.DVMSDETNNETE.E  | DVMS[S166.9984]DETNNETESP          | 3 | 0.544  | 0.014    | -0.007 | 0 | 25.84 | 20 | 569 | 44 | 2468 | -2.34 |
| 2544   | 8  | P46821 | K.QGSPDQVSPVSEM   | QGS[S166.9984]PDQV[S166.998]       | 2 | 2.253  | 2.80E-05 | -0.003 | 0 | 52.89 | 20 | 569 | 44 | 2468 | -1.05 |
| 2464.1 | 11 | P46821 | K.QGSPDQVSPVSEM   | QGS[S166.9984]PVSEMT               | 2 | 1.843  | 6.80E-05 | -0.001 | 0 | 49.79 | 21 | 569 | 44 | 2468 | -0.59 |
| 1039.5 | 5  | P46821 | R.DLSTPGLK.D      | DL[S166.9984]TPGLK                 | 2 | -0.882 | 0.04     | -0.002 | 0 | 20.54 | 19 | 569 | 44 | 2468 | -2.13 |
| 2173.9 | 8  | P46821 | R.AVSPMDEPVPDSI   | ASVS[S166.9984]PMDEPVPDES          | 2 | 1.978  | 2.10E-05 | -0.005 | 0 | 53.85 | 20 | 569 | 44 | 2468 | -2.37 |
| 1502.7 | 6  | P46821 | K.SPSSLSPSPLEK.T  | SPSSLSPSS[S166.9984]PLEK           | 2 | -0.014 | 0.005    | -0.003 | 0 | 32.22 | 22 | 569 | 44 | 2468 | -1.99 |
| 2334.8 | 18 | P46821 | K.FEDEGAGFEES.E   | FEDEGAGFEES[S166.9984]SETG         | 2 | 1.721  | 8.90E-05 | -0.006 | 0 | 45.57 | 18 | 569 | 44 | 2468 | -2.55 |
| 2093.9 | 14 | P46821 | R.AVSPMDEPVPDSI   | ASVS[S166.9984]PMDEPVPDES          | 2 | 0.261  | 0.026    | -0.004 | 0 | 24.01 | 21 | 569 | 44 | 2468 | -2.02 |
| 1287.6 | 8  | P46821 | R.SLMSSPEDLTK.D   | SLMS[S166.9984]PEDLTK              | 2 | 0.898  | 7.00E-04 | -0.002 | 0 | 38.34 | 19 | 569 | 44 | 2468 | -1.78 |
| 2382.4 | 19 | P46821 | K.VSAEAEVAPVPEV   | VSAEAEVAPVS[S166.9984]PEVT         | 3 | 0.469  | 0.019    | -0.007 | 0 | 26.09 | 21 | 569 | 44 | 2468 | -2.09 |
| 3202.4 | 11 | P46821 | K.VSAEAEVAPVPEV   | VSAEAEVAPVPEV[S166.9984]PEVT       | 3 | 0.604  | 0.014    | -0.007 | 0 | 27.44 | 21 | 569 | 44 | 2468 | -2.23 |
| 1367.5 | 7  | P46821 | R.SLMSSPEDLTK.D   | SLMS[S166.9984]PE                  | 2 | 0.83   | 8.60E-04 | -0.002 | 0 | 35.66 | 17 | 569 | 44 | 2468 | -1.47 |
| 2020.9 | 11 | P46821 | K.AAAGGAEQYGL     | AAAGGAEQYGLT[S166.9984]PE          | 2 | 1.978  | 8.70E-06 | -0.004 | 0 | 59.85 | 22 | 569 | 44 | 2468 | -1.99 |
| 2004.9 | 7  | P46821 | K.LGDVSPQIQDVSQF  | LDV[S166.9984]PTQIQDVSQFG          | 2 | 0.363  | 0.002    | -0.003 | 0 | 34.99 | 21 | 569 | 44 | 2468 | -1.47 |
| 1405.7 | 7  | P46821 | K.EVPSKEEPSVK.A   | EVPSKEEPS[S166.9984]PVK            | 2 | -0.86  | 0.037    | -0.003 | 1 | 23.76 | 22 | 569 | 44 | 2468 | -2.15 |
| 2464.1 | 12 | P46821 | K.QGSPDQVSPVSEM   | QGS[S166.9984]PDQVSPVSEM           | 2 | 0.06   | 0.048    | -0.005 | 0 | 21    | 20 | 569 | 44 | 2468 | -2.09 |
| 2464.1 | 12 | P46821 | K.QGSPDQVSPVSEM   | QGS[S166.9984]PDQVSPVSEM           | 2 | 2.727  | 1.00E-05 | -0.004 | 0 | 57.63 | 20 | 569 | 44 | 2468 | -1.6  |
| 2823.2 | 15 | P46821 | R.DVMSDETNNETE.E  | DVMS[S166.9984]DETNNETESP          | 3 | 1.859  | 6.70E-04 | -0.006 | 0 | 38.99 | 20 | 569 | 44 | 2468 | -2.46 |
| 1073.4 | 9  | P46821 | R.GAESPFEEK.S     | GAES[S166.9984]PFEK                | 2 | 0.352  | 0.002    | -0.002 | 0 | 30.88 | 17 | 569 | 44 | 2468 | -1.93 |
| 1394.7 | 13 | P46821 | K.VQSLGKLSPK.S    | VQSLGKLS[S166.9984]PK              | 2 | 0.379  | 0.002    | -0.003 | 1 | 36.15 | 22 | 569 | 44 | 2468 | -2.26 |
| 2108.8 | 16 | P46821 | K.DYNASASTISPPSSA | DYNASASTI[S166.9984]PPSSMI         | 2 | 0.513  | 0.002    | -0.006 | 0 | 35.49 | 20 | 569 | 44 | 2468 | -2.73 |
| 2334.8 | 12 | P46821 | K.FEDEGAGFEES.E   | FEDEGAGFEES[S166.9984]ETG          | 3 | 0.521  | 0.017    | -0.005 | 0 | 22.61 | 17 | 569 | 44 | 2468 | -2.03 |
| 2823.2 | 10 | P46821 | R.DVMSDETNNETE.E  | DVMS[S166.9984]DETNNETESP          | 3 | 0.989  | 0.005    | -0.007 | 0 | 30.22 | 20 | 594 | 42 | 2468 | -2.34 |
| 1570.6 | 10 | P46821 | K.SPSSDGSYETI.G   | SPSSDGSYETI[S166.9984]YETIG        | 2 | 0.356  | 0.002    | -0.003 | 0 | 32.82 | 19 | 594 | 42 | 2468 | -2.08 |
| 3202.4 | 12 | P46821 | K.VSAEAEVAPVPEV   | VSAEAEVAPVS[S166.9984]PEVT         | 3 | 0.168  | 0.039    | -0.007 | 0 | 23.01 | 21 | 594 | 42 | 2468 | -2.14 |
| 1982.9 | 8  | P46821 | R.ESSPLYSPTSDSTS  | ESSPLYSPTSDSTS[S166.9984]PTSDSTS   | 2 | -0.657 | 0.023    | -0.005 | 0 | 24.76 | 21 | 616 | 43 | 2468 | -2.45 |
| 3424.4 | 21 | P46821 | K.GPAESPDEGITTEC  | GPAES[S166.9984]PDEGITTEGE         | 3 | 0.159  | 0.033    | -0.008 | 0 | 21.92 | 20 | 594 | 42 | 2468 | -2.28 |
| 2173.9 | 11 | P46821 | R.AVSPMDEPVPDSI   | ASVS[S166.9984]PMDEPVPDES          | 2 | 1.084  | 3.90E-04 | -0.005 | 0 | 41.17 | 20 | 616 | 43 | 2468 | -2.37 |
| 1624.7 | 6  | P46821 | K.TTSPPEVSGYSYK   | TTSPPEVSGYSYK[S166.9984]PPEVSGYSYK | 2 | 1.675  | 1.00E-04 | -0.004 | 0 | 47.08 | 20 | 616 | 43 | 2468 | -2.28 |
| 1982.9 | 14 | P46821 | R.ESSPLYSPTSDSTS  | ESS[S166.9984]PLYSPTSDSTS          | 2 | -0.232 | 0.009    | -0.005 | 0 | 28.97 | 21 | 678 | 43 | 2468 | -2.45 |
| 2108.8 | 10 | P46821 | K.DYNASASTISPPSSA | DYNASASTI[S166.9984]SPSSMI         | 2 | 2.14   | 1.30E-05 | -0.006 | 0 | 56.91 | 20 | 678 | 43 | 2468 | -2.73 |
| 2043.9 | 6  | P46821 | K.HMDPPAPVQDRS    | HMDPPAPVQDRS[S166.9984]P           | 3 | 0.117  | 0.042    | -0.006 | 1 | 20.57 | 19 | 608 | 41 | 2468 | -2.41 |
| 2489   | 23 | P46821 | K.TATCHSSSPDPA.D  | TAT[160.0307]HSS[S166.9984]        | 3 | 0.137  | 0.038    | -0.006 | 0 | 21.8  | 20 | 471 | 36 | 2468 | -2.36 |
| 2108.8 | 8  | P46821 | K.DYNASASTISPPSSA | DYNASASTI[S166.9984]MI             | 2 | 2.823  | 6.70E-06 | -0.006 | 0 | 59.64 | 20 | 471 | 36 | 2468 | -2.73 |
| 1982.9 | 19 | P46821 | R.ESSPLYSPTSDSTS  | ES[S166.9984]SPLYSPTSDSTS          | 2 | -0.796 | 0.033    | -0.003 | 0 | 23.4  | 21 | 569 | 44 | 2468 | -1.63 |
| 2240.9 | 9  | P46821 | K.VSPSSPSSPSSPSS  | VSPSSPSSPSS[S166.9984]KSP          | 3 | -0.002 | 0.048    | -0.003 | 1 | 20.28 | 20 | 569 | 44 | 2468 | -1.5  |
| 2489   | 18 | P46821 | K.TATCHSSSPDPA.D  | TAT[160.0307]HSS[S166.998]         | 3 | 1.489  | 0.002    | -0.006 | 0 | 35.34 | 20 | 678 | 43 | 2468 | -2.36 |
| 2062.8 | 14 | P46821 | R.ESSPLYSPTSDSTS  | ESS[S166.9984]PLYSPTSDSTS          | 2 | -0.514 | 0.018    | -0.005 | 0 | 25.22 | 20 | 608 | 41 | 2468 | -2.08 |
| 3125.3 | 14 | P46821 | K.TLEVSPSSQSVTGS  | TLEV[S166.9984]PSQSVTGSAC          | 3 | 0.574  | 0.014    | -0.01  | 0 | 27.08 | 21 | 608 | 41 | 2468 | -3.21 |
| 1065.6 | 6  | P46821 | K.SDISPLTPR.E     | SDISPLT[S166.9984]PR               | 2 | -0.667 | 0.025    | -0.002 | 0 | 22.55 | 19 | 698 | 42 | 2468 | -2.35 |
| 1287.6 | 7  | P46821 | R.SLMSSPEDLTK.D   | SLMS[S166.9984]SPEDLTK             | 2 | 2.009  | 5.30E-05 | -0.003 | 0 | 49.31 | 19 | 698 | 42 | 2468 | -2.09 |
| 1065.6 | 7  | P46821 | K.SDISPLTPR.E     | SDIS[S166.9984]PLTR                | 2 | -0.65  | 0.024    | -0.001 | 0 | 22.72 | 19 | 698 | 42 | 2468 | -1.32 |
| 1301.6 | 7  | P47712 | R.CSVLSNVNVAR.R   | CSVLSNVNVAR[S166.9984]VLSLN        | 2 | 1.592  | 1.30E-04 | -0.002 | 0 | 40.08 | 18 | 136 | 5  | 749  | -1.56 |
| 1301.6 | 7  | P47712 | R.CSVLSNVNVAR.R   | CSVLSNVNVAR[S166.9984]VLSLN        | 2 | 1.921  | 6.30E-05 | -0.002 | 0 | 47.57 | 18 | 136 | 5  | 749  | -1.63 |
| 2157.8 | 16 | P47712 | K.HIVNSDSSDSDDES  | HIVNSDSSDDES[S166.9984]DS[166.99]  | 2 | 0.228  | 0.003    | -0.004 | 0 | 28.59 | 16 | 87  | 6  | 749  | -2.01 |
| 2237.7 | 8  | P47712 | K.HIVNSDSSDSDDES  | HIVNSDSSDDES[S166.9984]NS[166.998] | 3 | 0.273  | 0.025    | -0.004 | 0 | 16.09 | 13 | 87  | 6  | 749  | -1.82 |
| 2157.8 | 13 | P47712 | K.HIVNSDSSDSDDES  | HIVNSDSSDDES[S166.9984]SDS[166.99] | 2 | -0.333 | 0.01     | -0.004 | 0 | 22.93 | 16 | 93  | 4  | 749  | -2.01 |
| 2077.8 | 13 | P47712 | K.HIVNSDSSDSDDES  | HIVNSDSSDDES[S166.9984]DDESH       | 2 | 2.14   | 1.20E-07 | -0.004 | 0 | 74.22 | 18 | 120 | 6  | 749  | -1.84 |
| 983.46 | 6  | P48960 | R.ALRASESGL.-     | ALRAS[S166.9984]ESGI               | 2 | 0.109  | 0.004    | -0.001 | 1 | 31.45 | 20 | 31  | 2  | 835  | -1.44 |
| 3625.6 | 27 | P49006 | K.GAEASAASEEAGP   | GAESAASEEAGPQATEPSTPSG             | 3 | 2.572  | 6.90E-07 | -0.007 | 0 | 69.37 | 20 | 155 | 3  | 195  | -2.03 |
| 3705.5 | 16 | P49006 | K.GAEASAASEEAGP   | GAESAASEEAGPQATEPST[18]            | 3 | 2.296  | 2.50E-04 | -0.006 | 0 | 43.36 | 20 | 155 | 3  | 195  | -1.65 |
| 1453.7 | 17 | P49006 | R.GDVTAEEAAGASP   | GDVTAEEAAGAS[S166.9984]PAK         | 2 | 1.978  | 6.80E-08 | -0.003 | 0 | 80.5  | 21 | 155 | 3  | 195  | -2.08 |
| 3705.5 | 32 | P49006 | K.GAEASAASEEAGP   | GAESAASEEAGPQATEPSTPS[3]           | 3 | 2.177  | 3.30E-04 | -0.006 | 0 | 42.12 | 20 | 139 | 4  | 195  | -1.65 |
| 1468.6 | 9  | P49327 | K.ADEASELACPTPK.E | ADEASELACPTPK[S166.9984]PT[181.0]  | 2 | -0.352 | 0.013    | -0.003 | 0 | 25.77 | 19 | 49  | 8  | 2511 | -1.99 |
| 3063.4 | 21 | P49327 | K.ADEASELACPTPK.E | ADEASELACPTPK[S166.9984]PT[181.0]  | 2 | 1.999  | 5.20E-04 | -0.008 | 1 | 40.34 | 20 | 49  | 8  | 2511 |       |

|         |    |              |                                              |   |        |          |           |   |       |    |     |   |      |       |
|---------|----|--------------|----------------------------------------------|---|--------|----------|-----------|---|-------|----|-----|---|------|-------|
| 3366.5  | 22 | P51531       | K.KAEENAEAGESALG KAEENAEAGESALGPDGEPIDESS    | 3 | 1.544  | 2.10E-05 | -0.011    | 1 | 54.34 | 20 | 62  | 3 | 1590 | -3.22 |
| 3527.2  | 26 | P51531       | K.IAKEEESDESENEE IAKEEES[166.9984]EDES[166.9 | 3 | 1.189  | 0.003    | -0.005    | 1 | 28.24 | 16 | 74  | 2 | 1590 | -1.45 |
| 3366.5  | 27 | P51531       | K.KAEENAEAGESALG KAEENAEAGESALGPDGEPIDESS    | 3 | 1.394  | 3.10E-06 | -0.011    | 1 | 62.69 | 20 | 83  | 4 | 1590 | -3.22 |
| 1129.5  | 7  | P51608       | K.MPFQTSPPGGK.A MPFQTS[166.9984]PGGK         | 2 | -0.848 | 0.04     | -0.003    | 0 | 21.83 | 20 | 74  | 2 | 486  | -2.46 |
| 2009.9  | 15 | P51608       | K.AETSEGGSPAPVP AETSEGGSPAPVPEASAS[166.9     | 2 | 2.9    | 9.00E-09 | -0.004    | 0 | 88.44 | 21 | 88  | 2 | 486  | -2.24 |
| 3029.2  | 13 | P51636       | K.ADVQLFMDDDSSY ADVQLFMDDDSSY[243.0297]SH    | 3 | -0.005 | 0.048    | -0.008    | 0 | 19.3  | 19 | 19  | 1 | 162  | -1.57 |
| 2997.3  | 19 | P51798       | R.VGHMSSVELDELL VGHMSS[166.9984]VELDELLD     | 3 | 0.401  | 0.021    | -0.004    | 0 | 25.36 | 21 | 25  | 1 | 805  | -2.47 |
| 1124.5  | 7  | P51858       | R.AGDLLEDSPK.R AGDLLEDS[166.9984]PK          | 2 | 1.978  | 3.10E-05 | -0.002    | 0 | 51.6  | 19 | 85  | 8 | 240  | -2.04 |
| 2204.9  | 7  | P51858       | K.GNAEGSSDEEGKLV GNAEGS[166.9984]S[166.9984  | 2 | 1.2    | 3.40E-04 | -0.005    | 1 | 42.36 | 20 | 85  | 8 | 240  | -2.52 |
| 1280.6  | 8  | P51858       | R.RAGDLLEDSPK.R RAGDLLEDS[166.9984]PK        | 2 | -0.903 | 0.037    | -1.00E-04 | 1 | 27.33 | 21 | 85  | 8 | 240  | -0.07 |
| 2124.9  | 16 | P51858       | K.GNAEGSSDEEGKLV GNAEGS[166.9984]DEEGKLVII   | 3 | 0.628  | 0.012    | -0.004    | 1 | 27.63 | 21 | 110 | 8 | 240  | -1.89 |
| 1990.8  | 8  | P51991       | R.SGSPYGGGYSGGC SSGS[166.9984]PYGGGYSGGC     | 2 | 1.982  | 8.90E-06 | -0.005    | 0 | 55.84 | 18 | 56  | 1 | 378  | -2.73 |
| 1168.5  | 7  | P51991       | K.EDTEEYNLR.D EDTEEYNLR                      | 2 | -0.398 | 0.013    | -0.002    | 0 | 28.41 | 22 | 88  | 3 | 378  | -1.66 |
| 1990.9  | 9  | P51991       | R.SGSPYGGGYSGGC SSGS[166.9984]GSPYGGGYSGGC   | 2 | 2.241  | 5.00E-07 | -0.005    | 0 | 68.33 | 18 | 68  | 1 | 378  | -2.73 |
| 1956.8  | 13 | P52292       | R.NVSSFPDDATSLQ NVSSFPDDATSS[166.9984]PLQE   | 3 | 0.149  | 0.034    | -0.004    | 0 | 22.92 | 21 | 23  | 1 | 529  | -1.78 |
| 1164.5  | 4  | P52594       | K.GTPSQSPVGR.S GTPSQS[166.9984]PVVGR         | 2 | -0.655 | 0.024    | -0.002    | 0 | 31.76 | 21 | 25  | 4 | 562  | -1.54 |
| 1970.8  | 6  | P52701       | K.SEEDNEIESEEVQP SEEDNEIES[166.9984]EEVQPK   | 2 | 0.228  | 0.003    | -0.005    | 0 | 24.64 | 19 | 32  | 3 | 1360 | -2.48 |
| 2289    | 14 | P52756       | K.RGLVAAYSQSDNI RGLVAAYSQSDS[166.9984]DNEE   | 3 | 0.655  | 0.011    | -0.004    | 1 | 27.95 | 21 | 28  | 3 | 815  | -1.76 |
| 2289    | 13 | P52756       | K.RGLVAAYSQSDNI RGLVAAYS[166.9984]GDSNDNEE   | 3 | 1.394  | 4.90E-04 | -0.004    | 1 | 41.49 | 21 | 41  | 2 | 815  | -1.76 |
| 1896.10 | 10 | P52948       | K.PAPPPQSQSPEVC PAPPQSQS[166.9984]PEVEQL     | 2 | 0.294  | 0.003    | -0.005    | 0 | 34.3  | 21 | 114 | 8 | 1817 | -2.64 |
| 1973.8  | 8  | P52948       | R.DENLANSSEYENK DENLAS[166.9984]SEYENK       | 2 | 0.595  | 0.001    | -0.004    | 0 | 35.31 | 19 | 114 | 8 | 1817 | -2.02 |
| 1971.7  | 17 | P52948       | K.YGLQSDSEEEHHP YGLQSDS[166.9984]DEEEHHP     | 3 | 1.346  | 0.002    | -0.005    | 0 | 31.86 | 18 | 114 | 8 | 1817 | -2.34 |
| 1896.9  | 23 | P52948       | K.PAPPPQSQSPEVC PAPPQSQS[166.9984]QSEVEQL    | 2 | 0.769  | 9.00E-04 | -0.005    | 0 | 38.95 | 21 | 113 | 8 | 1817 | -2.64 |
| 1318.6  | 8  | P52948       | K.PIPQTPESAGNK.H PIPQTP[181.014]PESAGNK      | 2 | 0.266  | 0.003    | -0.003    | 0 | 34.02 | 21 | 114 | 8 | 1817 | -2.16 |
| 2456    | 28 | P53355       | R.SNMSVARSDDTLDI SNMSVARS[166.9984]DDTLDEE   | 3 | 1.644  | 0.001    | -0.004    | 1 | 36.79 | 20 | 37  | 3 | 1430 | -3.37 |
| 1361.6  | 5  | P53396       | K.PAMPQSDVSPR.S PAMPQSDVSPS[166.9984]PR      | 2 | 0.77   | 8.50E-04 | -0.003    | 0 | 38.01 | 20 | 44  | 3 | 1101 | -2.22 |
| 1560.7  | 10 | P53396       | K.AKPAMPQSDVSPR AKPAMPQSDVSPS[166.9984]PR    | 2 | -0.594 | 0.022    | -0.002    | 1 | 24.37 | 20 | 44  | 3 | 1101 | -1.33 |
| 1323.6  | 10 | P53621       | K.NLSPGAVESDVR.G NLS[166.9984]PGAVESDVR      | 2 | 0.184  | 0.003    | -0.002    | 0 | 33.15 | 21 | 33  | 1 | 1224 | -1.76 |
| 1439.6  | 12 | P53985       | K.DTDGGPKKEEESV.D TDGPKKEEES[166.9984]PV     | 2 | 0.029  | 0.005    | -0.002    | 1 | 27.65 | 17 | 47  | 2 | 500  | -1.58 |
| 1925.9  | 15 | P53985       | K.EEETSDVAGKPN.EEETS[166.9984]DVGKPNV        | 2 | -0.095 | 0.007    | -0.005    | 1 | 29.31 | 20 | 29  | 2 | 500  | -2.51 |
| 1925.9  | 15 | P53985       | K.EEETSDVAGKPN.EEETS[181.014]SDVAGKPNV       | 2 | -0.336 | 0.012    | -0.005    | 1 | 26.86 | 20 | 27  | 3 | 500  | -2.51 |
| 3394.4  | 23 | P54105       | K.FEESEKPEVADEEE FEESEKPEVADEEES[166.9984    | 3 | 1.41   | 5.10E-06 | -0.009    | 1 | 59.44 | 19 | 71  | 2 | 237  | -2.52 |
| 2645    | 13 | P54105       | K.EPVADEEESDDC.EPVADEEES[166.9984]DDDV       | 2 | 0.162  | 0.003    | -8.00E-04 | 0 | 30.98 | 19 | 71  | 2 | 237  | -0.3  |
| 1228.14 | 14 | P54652_P081C | R.VEHANDQGNR.I VEHANDQGNR                    | 2 | 0.472  | 0.002    | -0.002    | 0 | 34.08 | 19 | 51  | 2 | 237  | -1.81 |
| 1691.7  | 15 | P54652_P1114 | K.STAGDTHLGGEDFC STAGDTHLGGEDFDNR            | 2 | -0.044 | 0.006    | -0.005    | 0 | 30.85 | 21 | 39  | 2 | 363  | -3.02 |
| 3002.3  | 13 | P54725       | R.EDKSPSESAPTTS EDKSPS[166.9984]EESAPTTS     | 3 | 0.226  | 0.031    | -0.005    | 1 | 22.66 | 20 | 23  | 2 | 409  | -1.7  |
| 2640.2  | 15 | P54727       | K.PAEKPAETPVATSP.PAEKPAETPVATS[166.9984]PT   | 3 | 1.41   | 7.40E-05 | -0.007    | 1 | 48.45 | 20 | 151 | 4 | 409  | -2.7  |
| 2214.9  | 10 | P54727       | K.PAETPVATSPATD.PAETPVATS[166.9984]PATD      | 2 | 2.732  | 4.70E-06 | -0.004    | 0 | 62.97 | 22 | 151 | 4 | 409  | -2.04 |
| 2640.2  | 14 | P54727       | K.PAEKPAETPVATSP.PAEKPAETPVATSPT[181.014]A   | 3 | 1.655  | 7.80E-06 | -0.007    | 1 | 58.21 | 20 | 128 | 4 | 409  | -2.7  |
| 2320.1  | 18 | P55011       | K.ELGLDISHLQGEELI ELGLDISHLQGEELLS[166.998   | 3 | 0.796  | 0.008    | -0.004    | 0 | 29.36 | 21 | 29  | 3 | 1212 | -1.72 |
| 2286.1  | 11 | P55011       | R.DEGPAAAGDGLGR DEGPAAAGDGLGRPLGTPSQS[1      | 3 | 0.311  | 0.023    | -0.003    | 1 | 24.47 | 21 | 44  | 4 | 1212 | -1.32 |
| 2320.1  | 7  | P55011       | K.ELGLDISHLQGEELI ELGLDISHLQGEELLS           | 3 | 0.656  | 0.011    | -0.004    | 0 | 27.91 | 21 | 28  | 5 | 1212 | -1.72 |
| 2787    | 18 | P55081       | R.MEREDSEEEEEIC MEREDS[166.9984]S[166.9984   | 3 | 1.161  | 0.004    | -0.008    | 1 | 28.01 | 16 | 117 | 6 | 439  | -2.86 |
| 2362    | 8  | P55081       | K.IVEPEVVGESDSE.V IVEPEVVGES[166.9984]DS[166 | 2 | 1.694  | 9.80E-05 | -0.006    | 0 | 48.3  | 21 | 117 | 6 | 439  | -2.6  |
| 2282    | 12 | P55081       | K.IVEPEVVGESDSE.V IVEPEVVGES[166.9984]DSEVE  | 2 | 2.732  | 6.90E-07 | -0.005    | 0 | 70.2  | 21 | 117 | 6 | 439  | -2.33 |
| 2877.2  | 18 | P55081       | K.RSLAALDALNTDDE RSLAALDALNT[181.014]DDEND   | 3 | 1.449  | 0.002    | -0.004    | 1 | 35.85 | 21 | 168 | 8 | 439  | -1.38 |
| 2282    | 8  | P55081       | K.IVEPEVVGESDSE.V IVEPEVVGES[166.9984]EVEE   | 2 | 2.207  | 3.40E-05 | -0.005    | 0 | 53.33 | 21 | 239 | 8 | 439  | -2.25 |
| 1987.13 | 13 | P55196       | K.SQDADSPGSSGAP.SQDADS[166.9984]PGSSGAP      | 2 | 2.297  | 2.60E-05 | -0.004    | 0 | 53.33 | 20 | 88  | 8 | 1824 | -2.65 |
| 1516.7  | 10 | P55196       | R.SSPNVANQPSPGK SSPNVANQPSPS[166.9984]PGG    | 2 | 1.987  | 4.70E-05 | -0.002    | 0 | 51.23 | 21 | 88  | 8 | 1824 | -1.82 |
| 1302.6  | 5  | P55196       | R.LFSQGDVSNK.V LFS[166.9984]QGQDVS           | 2 | -0.693 | 0.024    | -0.003    | 0 | 24.38 | 21 | 87  | 7 | 1824 | -2.2  |
| 1923.8  | 6  | P55265       | K.TAESQTPPSATFSF TAEQ[181.014]TPPSATFS       | 2 | 0.53   | 0.002    | -0.003    | 0 | 36.66 | 21 | 37  | 5 | 1226 | -1.5  |
| 1393.6  | 7  | P55327       | K.NSPFTKSFEEK.V NSPFTKS[166.9984]FEEK        | 2 | -0.947 | 0.045    | -0.003    | 1 | 21.82 | 21 | 22  | 1 | 224  | -2.02 |
| 3335.4  | 15 | P55347       | K.TEQDPCNCEPADEC TEQDPC[160.0307]SEPADEC     | 3 | 2.572  | 5.50E-05 | -0.005    | 0 | 50.12 | 20 | 50  | 1 | 224  | -1.54 |
| 1885.17 | 17 | P55884       | R.SDSRAQAVSEDAAG S[166.9984]DSRAQAVSEDAAG    | 2 | -0.762 | 0.031    | -0.004    | 1 | 22.74 | 20 | 70  | 2 | 814  | -2.32 |
| 1885.9  | 9  | P55884       | R.SDSRAQAVSEDAAG S[166.9984]RAQAVSEDAAG      | 2 | 1.319  | 2.60E-04 | -0.004    | 1 | 43.5  | 20 | 39  | 2 | 814  | -2.32 |
| 4538    | 38 | P55884       | R.TEPAEAEAAAGSPS.TEPAEAEAAAGSPSPS[166.99     | 4 | 1.626  | 9.00E-04 | -0.01     | 0 | 37.95 | 20 | 45  | 4 | 814  | -2.13 |
| 4538    | 40 | P55884       | R.TEPAEAEAAAGSPS.TEPAEAEAAAGSPS[166.9984]G   | 4 | 0.191  | 0.008    | -0.01     | 0 | 28.49 | 20 | 52  | 3 | 814  | -2.13 |
| 4618    | 13 | P55884       | R.TEPAEAEAAAGSPS.TEPAEAEAAAGSPS[166.9984]G   | 4 | 0.265  | 0.02     | -0.012    | 0 | 24.3  | 20 | 66  | 3 | 814  | -2.62 |
| 4538    | 32 | P55884       | R.TEPAEAEAAAGSPS.TEPAEAEAAAGSPS[166.9984]G   | 4 | 0.15   | 0.004    | -0.01     | 0 | 31.66 | 20 | 42  | 3 | 814  | -2.13 |
| 1849.13 | 13 | P60468       | M.PGPTPSGTNVGSS.PGPTPSGTNVGSS[166.9984]G     | 3 | 0.271  | 0.027    | -0.003    | 1 | 24.11 | 21 | 33  | 3 | 96   | -1.68 |
| 1929.8  | 8  | P60468       | M.PGPTPSGTNVGSS.PGPTPSGTNVGSS[166.9984]GR    | 2 | -0.754 | 0.028    | -0.005    | 1 | 23.77 | 21 | 35  | 4 | 96   | -2.76 |
| 1849.17 | 17 | P60468       | M.PGPTPSGTNVGSS.PGPTPSGTNVGSS[166.9984]GR    | 2 | -0.832 | 0.032    | -0.004    | 1 | 33.01 | 21 | 25  | 5 | 96   | -2.06 |
| 1849.11 | 11 | P60468       | M.PGPTPSGTNVGSS.PGPTPSGTNVGSS[166.9984]GR    | 2 | 0.591  | 0.001    | -0.004    | 1 | 37.27 | 21 | 34  | 3 | 96   | -2.06 |
| 1544.7  | 7  | P60660       | K.DQGYEDYVEGLR.L DQGYEDYVEGLR                | 2 | 1.762  | 8.70E-05 | -0.002    | 0 | 48.98 | 21 | 49  | 1 | 151  | -1.64 |
| 976.45  | 8  | P60709_A5A31 | K.AGFAGDDAPR.A AGFAGDDAPR                    | 2 | 0.543  | 0.001    | -0.002    | 0 | 34.74 | 19 | 116 | 2 | 204  | -2.04 |
| 1516.7  | 15 | P60709_A5A31 | K.QEYDESGPVS.VH.R QEYDESGPVS.VH.R            | 3 | 1.366  | 0.002    | -0.004    | 0 | 35.06 | 21 | 148 | 3 | 204  | -1.85 |
| 1870.9  | 11 | P60709_A5A31 | K.SYELPDGQVITIGNI S[166.9984]YELPDGQVITIGN   | 2 | -0.366 | 0.012    | -0.004    | 0 | 27.7  | 21 | 148 | 3 | 204  | -1.51 |
| 1790.10 | 10 | P60709_A5A31 | K.SYELPDGQVITIGNI S[166.9984]YELPDGQVITIGN   | 2 | 1.648  | 1.30E-04 | -0.003    | 0 | 46.74 | 20 | 118 | 2 | 204  | -1.9  |
| 1198.5  | 9  | P60709_P6273 | K.DSVYGDEAQS.K.R DSVYGDEAQS                  | 2 | 1.978  | 2.50E-05 | -0.003    | 0 | 53.9  | 20 | 148 | 2 | 204  | -1.61 |
| 998.49  | 6  | P60709_P6273 | R.DLTDYLMK.I DLTDYLMK                        | 2 | -0.752 | 0.028    | -0.001    | 0 | 21.84 | 19 | 86  | 1 | 204  | -1.4  |
| 1954.1  | 9  | P60709_P632E | R.VAPEEHPVLLTEAPL VAPEEHPVLLTEAPLNPK         | 3 | 0.798  | 0.008    | -0.004    | 0 | 23.31 | 15 | 111 | 8 | 204  | -1.88 |
| 1132.5  | 8  | P60709_P632E | R.GYSFTTAE.R GYSFTTAE                        | 2 | -0.771 | 0.031    | -0.002    | 0 | 22.65 | 20 | 86  | 2 | 204  | -2.06 |
| 1416.7  | 10 | P61224_A6N1Z | K.DTDDVPMVLGNK.DTDDVPMVLGNK                  | 2 | -0.718 | 0.027    | -0.003    | 0 | 24.04 | 21 | 24  | 2 | 204  | -2.06 |
| 1370.6  | 7  | P61247       | R.ADGYEPPVQES.V ADGYEPPVQES[166.9984]V       | 2 | 0.243  | 0.003    | -0.001    | 0 | 31.79 | 19 | 32  | 1 | 264  | -0.85 |
| 1078.4  | 9  | P61978       | R.DYDDMSPR.R DYDDMS[166.9984]PR              | 2 | 0.624  | 0.001    | -0.002    | 0 | 30.6  | 14 | 31  | 2 | 463  | -1.86 |
| 1234.6  | 6  | P61978       | R.RDYDDMSPR.R RDYDDMS[166.9984]PR            | 2 | -0.999 | 0.046    | -0.002    | 1 | 18.4  | 18 | 34  | 4 | 463  | -1.95 |
| 1106.5  | 7  | P61978       | R.NTDEMVELR.I NTDEMVELR                      | 2 | 1.321  | 2.50E-04 | -0.002    | 0 | 43.43 | 20 | 56  | 5 | 463  | -1.84 |
| 2193.9  | 18 | P61981       | R.DNLTWTSDDQDC DNLTWTSDDQDCDDGEGNN           | 3 | 1.033  | 0.005    | -0.003    | 0 | 29.73 | 21 | 71  | 3 | 247  | -1.47 |
| 1643.8  | 8  | P61981       | K.NVTLENEPLNEER.NVTLENEPLNEER                | 2 | -0.571 | 0.018    | -0.003    | 0 | 25.68 | 21 | 90  | 3 | 247  | -1.57 |
| 1909.14 | 14 | P62070       | K.FQEQCEPPSPETRI FQEQCE[160.0307]PPS[166.99  | 2 | -0.444 | 0.013    | -0.005    | 1 | 26.92 | 21 | 27  | 1 | 204  | -2.4  |
| 1596.7  | 13 | P62158       | K.DTSEEEIREAFR.V DTSEEEIREAFR                | 2 | -0.022 | 0.005    | -0.004    | 1 | 31.91 | 21 | 31  | 1 | 149  | -2.63 |
| 1265.6  | 7  | P62158       | K.DGNGVISAEL                                 |   |        |          |           |   |       |    |     |   |      |       |

|         |    |        |                   |                                       |   |        |          |        |   |       |    |     |    |      |       |
|---------|----|--------|-------------------|---------------------------------------|---|--------|----------|--------|---|-------|----|-----|----|------|-------|
| 1667.7  | 11 | P67809 | K.NEGSESAPEGQAQI  | NEGS[166.9984]ESAPEGQAQI              | 2 | 0.997  | 5.00E-04 | -0.002 | 0 | 40.3  | 20 | 244 | 11 | 324  | -0.94 |
| 3417.3  | 24 | P67809 | R.NYQQNQVNSSEGE   | NYQQNQVNS[166.9984]ESGEKI             | 3 | 1.12   | 0.004    | -0.007 | 1 | 29.63 | 18 | 214 | 9  | 324  | -2.14 |
| 3417.3  | 20 | P67809 | R.NYQQNQVNSSEGE   | NYQQNQVNS[166.9984]ESGEKI             | 3 | 1.374  | 0.002    | -0.007 | 1 | 32.67 | 18 | 201 | 9  | 324  | -2.14 |
| 1977.8  | 10 | P67809 | K.AADPPAENSAPAE   | AADPPAENS[166.9984]SAPEAE             | 2 | 1.982  | 2.10E-06 | -0.004 | 0 | 63.03 | 19 | 268 | 11 | 324  | -2.08 |
| 3337.4  | 24 | P67809 | R.NYQQNQVNSSEGE   | NYQQNQVNS[166.9984]GEKI               | 3 | 1.544  | 3.10E-04 | -0.012 | 1 | 42.02 | 19 | 200 | 9  | 324  | -3.65 |
| 1216.6  | 6  | P78310 | R.TPQSPVTLPPAK.V  | TPQS[166.9984]PTLPPAK                 | 2 | -0.918 | 0.045    | -0.002 | 0 | 22.13 | 21 | 22  | 1  | 365  | -1.74 |
| 1767.7  | 10 | P78316 | K.RFGEYNSNMSPEEK  | RFGEYNSNMS[166.9984]PEEK              | 2 | -0.175 | 0.007    | -0.004 | 2 | 26.56 | 18 | 27  | 2  | 857  | -2.2  |
| 3284.4  | 25 | P78332 | R.EGETQGVAFEHESP  | EGETQGVAFEHESPADFNQNSQ[3]             | 3 | 1.41   | 3.10E-06 | -0.009 | 0 | 63.28 | 21 | 63  | 2  | 1123 | -2.61 |
| 3364.3  | 28 | P78332 | R.EGETQGVAFEHESP  | EGETQGVAFEHESPADFNQNSQ[16]            | 3 | 1.022  | 0.005    | -0.008 | 0 | 30.57 | 20 | 69  | 2  | 1123 | -2.61 |
| 3518.6  | 17 | P78345 | R.IEDSGENLEPLESI  | IEDSGENLEPLESDRELLDTS[1]              | 3 | 1.565  | 0.001    | -0.013 | 1 | 36    | 20 | 36  | 1  | 283  | -3.56 |
| 1476.7  | 7  | P78345 | R.ELDTSFEDLSK.P   | ELDTS[166.9984]FEDLSK                 | 2 | -0.801 | 0.021    | -0.002 | 0 | 24.38 | 22 | 24  | 2  | 283  | -2.4  |
| 3518.6  | 10 | P78345 | R.IEDSGENLEPLESI  | IEDSGENLEPLESDRELLDTSF3               | 3 | 1.427  | 0.002    | -0.013 | 1 | 34.67 | 20 | 35  | 1  | 283  | -3.56 |
| 1352.6  | 4  | P78347 | R.SILSPGGSCGPIK.V | SILS[166.9984]PGGSC[160.030]          | 2 | -0.496 | 0.017    | -0.002 | 0 | 25.35 | 20 | 25  | 2  | 998  | -1.76 |
| 3420.6  | 16 | P78347 | K.INSSPNVNTASGV   | INSSPNVNT[181.014]TAGSVD              | 3 | 0.154  | 0.033    | -0.003 | 0 | 21.94 | 20 | 22  | 1  | 998  | -0.97 |
| 1242.6  | 7  | P78362 | R.TVSASSTGDLPK.A  | TVSASST[181.014]GDLPK                 | 2 | 0.174  | 0.004    | -0.002 | 0 | 33.1  | 21 | 51  | 2  | 688  | -0.97 |
| 5036.3  | 28 | P78362 | K.APLVPPPPPPPPPI  | APLVPPPPPPPPPPPPPPDPPTPI              | 4 | 0.038  | 5.80E-04 | -0.004 | 0 | 36.53 | 17 | 51  | 2  | 688  | -0.79 |
| 5036.3  | 28 | P78362 | K.APLVPPPPPPPPPI  | APLVPPPPPPPPPPPPPPDPPT[18]            | 4 | 0.319  | 0.009    | -0.004 | 0 | 24.74 | 17 | 25  | 1  | 688  | -0.79 |
| 1242.6  | 9  | P78362 | R.TVSASSTGDLPK.A  | TVS[166.9984]ASSTGDLPK                | 2 | -0.555 | 0.019    | -0.002 | 0 | 25.67 | 21 | 28  | 2  | 688  | -1.88 |
| 2395    | 16 | P78527 | K.LTPLPEDNSMNVDC  | LTPLEPNS[166.9984]MNVDC               | 2 | -0.819 | 0.033    | -0.004 | 0 | 23.07 | 21 | 23  | 2  | 4128 | -1.64 |
| 1496.6  | 7  | P78536 | K.SFEDLTDHPVTR.S  | [166.9984]FEDLTDHPVTR                 | 2 | 0.006  | 0.005    | -0.003 | 0 | 31.42 | 21 | 31  | 1  | 824  | -2.02 |
| 2778.2  | 25 | P80723 | K.AEGAAATEEGTPKE  | AEGAAATEEGTPKE[181.014]PKESEF         | 3 | 2.572  | 2.30E-05 | -0.007 | 1 | 53.38 | 20 | 96  | 9  | 227  | -2.61 |
| 1466.6  | 10 | P80723 | K.ETPAATEAPSPDK   | ETPAATEAPSPDK[181.014]PK              | 2 | 0.226  | 0.003    | -0.003 | 0 | 33.62 | 21 | 96  | 9  | 227  | -1.86 |
| 2012.8  | 18 | P80723 | K.SDGPASDCKPGSS   | SDGPASDCKPGSS[166.9984]DSKPGSS        | 2 | -0.876 | 0.037    | -0.002 | 1 | 21.5  | 20 | 75  | 6  | 227  | -1.62 |
| 1466.6  | 8  | P80723 | K.ETPAATEAPSPDK   | ETPAATEAPSPDK[166.9984]TPK            | 2 | 0.092  | 0.004    | -0.003 | 0 | 32.18 | 21 | 75  | 6  | 227  | -1.86 |
| 2298.1  | 20 | P80723 | K.AEPPKAPEQEQA    | AEPPKAPEQEQAAGPAAGGEAF                | 3 | 0.484  | 0.015    | -0.006 | 1 | 25.19 | 20 | 100 | 7  | 227  | -2.49 |
| 1932.9  | 9  | P80723 | K.SDGPASDCKPGSS   | SDGPASDCKPGSS[166.9984]EAPSSK         | 2 | -0.606 | 0.02     | -0.002 | 1 | 24.16 | 20 | 94  | 8  | 227  | -0.93 |
| 2716.2  | 13 | P80723 | K.AAEAAAAPEAES    | AAEAAAAPEAES[166.9984]AAPA            | 3 | 0.151  | 0.038    | -0.006 | 1 | 21.85 | 20 | 94  | 8  | 227  | -2.33 |
| 2012.8  | 19 | P80723 | K.SDGPASDCKPGSS   | SDGPASDCKPGSS[166.9984]DAPASDCKPGSS   | 2 | -0.56  | 0.018    | -0.002 | 1 | 24.62 | 20 | 94  | 8  | 227  | -1.25 |
| 3092.4  | 29 | P82094 | R.SATPVNCEQDILV   | SAT[181.014]PVNCEQDILV                | 3 | 1.41   | 7.10E-05 | -0.007 | 0 | 48.29 | 19 | 70  | 4  | 1093 | -2.19 |
| 1559.6  | 10 | P82094 | R.SVSEINSDDELSG   | SVSEINSDDELSG[166.9984]DDELSG         | 2 | 0.726  | 8.90E-04 | -0.003 | 0 | 37.52 | 20 | 63  | 6  | 1093 | -1.69 |
| 1532.7  | 9  | P82094 | K.SNTEQSPPIASPK   | SNTEQSPPIASPK[166.9984]PIASPK         | 2 | -0.772 | 0.034    | -0.004 | 0 | 23.54 | 21 | 63  | 6  | 1093 | -2.35 |
| 2497    | 12 | P84157 | K.GPSSGPEEEDGEG   | GPSSGPEEEDGEGSFKYS[166.9984]          | 2 | -0.53  | 0.018    | -0.004 | 1 | 25.06 | 20 | 80  | 3  | 204  | -1.51 |
| 2497    | 13 | P84157 | K.GPSSGPEEEDGEG   | GPSSGPEEEDGEGS[166.9984]              | 3 | 1.152  | 0.004    | -0.005 | 1 | 31.92 | 20 | 80  | 3  | 204  | -1.91 |
| 3265.3  | 20 | P84157 | R.QEEQDLDEGKGP    | QEEQDLDEGKGPSS[166.9984]              | 3 | 2.572  | 4.50E-06 | -0.007 | 1 | 60.59 | 20 | 80  | 3  | 204  | -2.21 |
| 1964.7  | 12 | P84157 | K.GPSSGPEEEDGEG   | GPSS[166.9984]EGPEEEDGEGF             | 2 | -0.175 | 0.007    | -0.004 | 0 | 27.58 | 19 | 54  | 3  | 204  | -2.31 |
| 2942.2  | 15 | P85037 | R.SGGQLTPECLREG   | SGGQLTPECLREG[160.0307]LS[166.9984]   | 3 | 0.485  | 0.016    | -0.009 | 1 | 26.25 | 21 | 26  | 3  | 733  | -3.04 |
| 1384.6  | 5  | P85037 | R.SGGQLTPECLREG   | SGGQLT[181.014]PEC[160.030]           | 2 | -0.86  | 0.041    | -0.002 | 0 | 20.66 | 19 | 42  | 11 | 733  | -1.77 |
| 1576.7  | 12 | P85037 | R.EGSPPHDFEFGSK   | EGSPPHDFEFGSK[166.9984]PHDFEFGSK      | 2 | -0.926 | 0.049    | -0.003 | 0 | 21    | 20 | 42  | 11 | 733  | -2.17 |
| 2266.1  | 8  | P85037 | K.EEAPASPLRPLYPQ  | EEAPASPLRPLYPQ[166.9984]PLRPLYPQ      | 3 | 0.442  | 0.019    | -0.004 | 1 | 23.75 | 19 | 42  | 11 | 733  | -1.71 |
| 1694.10 | 8  | P86452 | R.SESPIVAEQGLTM   | SESPIVAEQGLTM[166.9984]PIVAEQGLTM     | 2 | 1.124  | 4.00E-04 | -0.004 | 0 | 42.53 | 21 | 43  | 2  | 979  | -2.06 |
| 1293.6  | 6  | P98082 | K.SSPNPFVGSPPK.G  | SSPNPFVGSPPK[166.9984]PK              | 2 | -0.292 | 0.011    | -0.002 | 0 | 27.39 | 20 | 27  | 3  | 770  | -2.46 |
| 2115.8  | 19 | P98175 | R.GLVAAVYSGDSEI   | GLVAAVYSGDSEI[166.9984]DS[166.9984]   | 2 | -0.971 | 0.044    | -0.005 | 0 | 19.65 | 19 | 20  | 2  | 930  | -2.36 |
| 1290.6  | 12 | P98175 | K.LASDDRRSPRR.G   | LASDDRRSPRR[166.9984]PPR              | 2 | -0.42  | 0.014    | -0.003 | 1 | 26.13 | 20 | 69  | 3  | 930  | -2.08 |
| 2035.5  | 15 | P98175 | R.GLVAAVYSGDSEI   | GLVAAVYSGDSEI[166.9984]EDEC           | 2 | 1.985  | 2.60E-05 | -0.004 | 0 | 54.23 | 21 | 69  | 3  | 930  | -1.76 |
| 1859.8  | 11 | Q00341 | K.VATLNSSEESDPT   | VATLNS[166.9984]EESDPTTYK             | 2 | 1.978  | 2.10E-05 | -0.004 | 0 | 54.94 | 21 | 55  | 1  | 1268 | -2.43 |
| 1334.6  | 6  | Q00610 | K.IYDSDNNPER.F    | IYDSDNNPER                            | 2 | -0.054 | 0.005    | -0.004 | 0 | 30.75 | 21 | 31  | 3  | 1675 | -3.36 |
| 1291.6  | 8  | Q00839 | R.GYFYEIENK.Y     | GYFYEIENK                             | 2 | 0.881  | 6.80E-04 | -0.002 | 0 | 39.17 | 20 | 86  | 4  | 825  | -1.53 |
| 3206.4  | 27 | Q00839 | R.LQAALDDEEAGRR   | LQAALDDEEAGRRPAMEPENGNS               | 3 | 1.41   | 2.60E-06 | -0.001 | 1 | 64.36 | 21 | 86  | 4  | 825  | -0.88 |
| 1560.6  | 8  | Q01082 | K.ESSPISPTSDRKA   | ESS[166.9984]PIS[166.9984]F           | 2 | -0.482 | 0.014    | -0.003 | 1 | 25.54 | 20 | 26  | 6  | 2364 | -1.33 |
| 1432.5  | 5  | Q01082 | K.ESSPISPTSDRKA   | ESS[166.9984]PISPT[181.014]           | 2 | -0.721 | 0.025    | -0.002 | 0 | 21.12 | 18 | 24  | 7  | 2364 | -1.52 |
| 1432.5  | 10 | Q01082 | K.ESSPISPTSDRKA   | ESS[166.9984]PIS[166.9984]F           | 2 | -0.911 | 0.038    | -0.002 | 0 | 19.28 | 18 | 20  | 10 | 2364 | -1.52 |
| 1480.8  | 7  | Q01082 | K.ESSPISPTSDRKA   | ESSPISPTSDRKA[166.9984]DRK            | 2 | -0.092 | 0.006    | -0.002 | 1 | 30.3  | 21 | 32  | 9  | 2364 | -1.49 |
| 2195    | 17 | Q01105 | K.EQQAIEHIDEVQN   | EQQAIEHIDEVQNEIDR                     | 3 | 0.97   | 0.005    | -0.004 | 0 | 31.1  | 21 | 31  | 1  | 290  | -1.71 |
| 1730.8  | 9  | Q01130 | K.VDNLTYRTPDTRL   | VDNLTYRTPDTRL[181.014]SPDTRL          | 3 | 1.017  | 0.005    | -0.003 | 1 | 31.57 | 21 | 32  | 2  | 221  | -1.9  |
| 1751.7  | 20 | Q01130 | R.DAEDAMDAMDGA    | DAEDAMDAMDGAVALDR                     | 2 | 2.462  | 1.80E-05 | -0.002 | 0 | 54.95 | 20 | 66  | 3  | 221  | -1.42 |
| 1730.8  | 7  | Q01130 | K.VDNLTYRTPDTRL   | VDNLTYRTPDTRL[166.9984]PDTRL          | 3 | 0.382  | 0.022    | -0.003 | 1 | 25.15 | 21 | 67  | 3  | 221  | -1.9  |
| 1754.8  | 7  | Q01167 | R.EGSPAPLEPEPGA   | EGS[166.9984]PAPLEPEPGAQ              | 3 | -0.837 | 0.034    | -0.004 | 0 | 22.99 | 21 | 23  | 4  | 660  | -2.41 |
| 1628.7  | 15 | Q01518 | K.PFSAPKQTSPPSK   | PFSAPKQTSPPSK[166.9984]PS[166.9984]   | 3 | 0.345  | 0.024    | -0.003 | 1 | 24.81 | 21 | 55  | 7  | 475  | -2.09 |
| 1628.7  | 11 | Q01518 | K.PFSAPKQTSPPSK   | PFSAPKQTSPPSK[181.014]SPS[166.9984]   | 3 | 0.727  | 0.001    | -0.006 | 1 | 38.53 | 21 | 39  | 1  | 475  | -3.74 |
| 1781.8  | 8  | Q01650 | K.SADGSAPAGEGEG   | SADGSAPAGEGEGV[166.9984]PAGEGEGV      | 2 | 2.732  | 7.20E-06 | -0.005 | 0 | 59.1  | 20 | 93  | 2  | 507  | -2.78 |
| 1781.8  | 14 | Q01650 | K.SADGSAPAGEGEG   | SADGSAPAGEGEGV[166.9984]ADGSAPAGEGEGV | 2 | 2.053  | 4.30E-05 | -0.004 | 0 | 50.89 | 20 | 93  | 2  | 507  | -2.45 |
| 1781.8  | 13 | Q01650 | K.SADGSAPAGEGEG   | SADGSAPAGEGEGV[181.014]JL             | 2 | 2.123  | 3.90E-05 | -0.004 | 0 | 51.49 | 20 | 135 | 3  | 507  | -2.11 |
| 1701.8  | 14 | Q01650 | K.SADGSAPAGEGEG   | SADGSAPAGEGEGVTLQR                    | 2 | 2.863  | 2.60E-06 | -0.004 | 0 | 63.18 | 20 | 142 | 3  | 507  | -2.61 |
| 1669.7  | 7  | Q01664 | K.DEGISDPIWEDEK   | DEGISDPIWEDEK[166.9984]PDIWEDEK       | 2 | -0.356 | 0.013    | -0.001 | 0 | 25.77 | 19 | 26  | 1  | 338  | -0.83 |
| 2112.9  | 15 | Q01664 | R.AEDKDEGIGSDPIA  | AEDKDEGIGSDPIA[166.9984]PDIWE         | 3 | 0.321  | 0.025    | -0.004 | 1 | 24.55 | 21 | 25  | 1  | 338  | -1.65 |
| 1837.8  | 14 | Q01814 | K.SATSSPGSPHSLE   | SATSSPGSPHSLETS[166.9984]             | 2 | 0.252  | 0.003    | -0.002 | 0 | 33.88 | 21 | 39  | 2  | 1243 | -0.93 |
| 1837.8  | 11 | Q01814 | K.SATSSPGSPHSLE   | SATSSPGSPHSLETS[166.9984]PHSLETS      | 2 | 0.233  | 0.003    | -0.001 | 0 | 33.66 | 21 | 53  | 2  | 1243 | -0.55 |
| 3048.2  | 9  | Q01831 | K.SEAAPHTDAGGG    | SEAAPHTDAGGGLS[166.9984]              | 3 | 1.41   | 1.00E-04 | -0.007 | 0 | 46.15 | 19 | 46  | 1  | 940  | -2.19 |
| 3048.2  | 34 | Q01831 | K.SEAAPHTDAGGG    | SEAAPHT[181.014]DAGGGLS               | 3 | 1.544  | 0.001    | -0.007 | 0 | 34.92 | 19 | 46  | 5  | 940  | -2.19 |
| 2968.2  | 27 | Q01831 | K.SEAAPHTDAGGG    | SEAAPHTDAGGGLS[166.9984]              | 3 | 1.087  | 0.004    | -0.007 | 0 | 30.2  | 19 | 46  | 5  | 940  | -2.35 |
| 2087.9  | 17 | Q01831 | K.DEALSDGDDLRFF   | DEALS[166.9984]DGDRLDRFFS             | 2 | -0.915 | 0.044    | -0.006 | 1 | 21.21 | 20 | 50  | 3  | 940  | -2.77 |
| 2044.9  | 19 | Q02241 | K.YMLTHQELASDGEI  | YMLTHQELASDGEI[166.9984]DGEIE         | 3 | 0.375  | 0.02     | -0.005 | 0 | 25.15 | 21 | 45  | 3  | 960  | -2.24 |
| 3651.7  | 25 | Q02447 | K.IGPPSPQDDEEAAA  | IGPPSPQDDEEAAA[166.9984]PGDDEEAAA     | 3 | 0.676  | 0.01     | -0.005 | 0 | 27.09 | 20 | 27  | 1  | 960  | -1.29 |
| 1538.7  | 7  | Q02818 | K.AQRLSQETALGR.S  | AQRLSQETALGR[166.9984]QETALGR         | 2 | -0.644 | 0.022    | -0.004 | 1 | 24.87 | 21 | 25  | 2  | 461  | -2.68 |
| 2413.1  | 27 | Q02880 | K.VKASPIINDGEDEF  | VKAS[166.9984]PITNDGEDEFV             | 3 | 0.928  | 0.005    | -0.005 | 1 | 30.68 | 21 | 149 | 17 | 1626 | -2.1  |
| 2875.2  | 21 | Q02880 | K.SEDSIAKFDNEED   | SEDSIAKFDNEEDS[166.9984]NEEDS         | 3 | 1.41   | 6.90E-04 | -0.005 | 1 | 39.78 | 21 | 149 | 17 | 1626 | -1.82 |
| 1859.8  | 7  | Q02880 | K.SESDLEETPVVPR   | SES[166.9984]DLEETPVVPR               | 2 | -0.897 | 0.037    | -0.005 | 0 | 21.39 | 20 | 149 | 17 | 1626 | -2.64 |
| 3290.3  | 14 | Q02880 | K.ASPITNDGEDEFV   | ASPITNDGEDEFVPS[166.9984]I            | 3 | 0.194  | 0.036    | -0.003 | 1 | 2     |    |     |    |      |       |

|        |    |        |                                                 |        |          |        |   |       |    |     |    |      |       |
|--------|----|--------|-------------------------------------------------|--------|----------|--------|---|-------|----|-----|----|------|-------|
| 1907.6 | 10 | Q03188 | K.NVDVDEEVHGSSD NDVDDEEVHGS[166.9984]SDD 2      | -0.427 | 0.014    | -0.002 | 0 | 20.09 | 14 | 20  | 3  | 943  | -0.93 |
| 1827.7 | 10 | Q03188 | K.NVDVDEEVHGSSD NDVDDEEVHGS[166.9984]DD 2       | 0.206  | 0.004    | -0.002 | 0 | 29.28 | 17 | 29  | 4  | 943  | -1.24 |
| 1204.6 | 8  | Q03252 | R.AGGPATPLSPTLR.L AGGPATPLS[166.9984]PTR 2      | -0.724 | 0.026    | -0.002 | 0 | 24.12 | 21 | 45  | 5  | 600  | -1.97 |
| 1348.6 | 8  | Q03252 | R.ATSSSSGSLSATGR. ATSS[166.9984]SSGSLSATGR 3    | 1.004  | 5.40E-04 | -0.004 | 0 | 40.4  | 20 | 45  | 5  | 600  | -2.76 |
| 3132.1 | 11 | Q03701 | R.SQLDDHPESDEEN.SQLDDHPES[166.9984]DDEENF 3     | 1.41   | 4.50E-04 | -0.007 | 0 | 39.25 | 18 | 39  | 3  | 1054 | -2.08 |
| 4347.6 | 10 | Q04446 | K.GLVYNCIQLMAMI GLVY[243.0297]NC[160.0307]I 4   | -0.001 | 0.039    | -0.015 | 0 | 17.68 | 16 | 18  | 4  | 702  | -3.38 |
| 1357.7 | 7  | Q04637 | K.REALPPVSPK.A REALPPVS[166.9984]PLK 2          | -0.278 | 0.011    | -0.003 | 1 | 25.48 | 18 | 25  | 1  | 1599 | -1.91 |
| 1201.6 | 11 | Q04637 | R.EAALPPVSPK.A EAALPPVS[166.9984]PLK 2          | 0.157  | 0.003    | -0.002 | 0 | 31.86 | 20 | 32  | 2  | 1599 | -1.65 |
| 2234   | 20 | Q04656 | R.VSITSEVSTNSPNS.VSITSEVSTNSPNS[166.9984]S 3    | 1.046  | 0.005    | -0.004 | 0 | 31.86 | 21 | 46  | 3  | 1500 | -1.9  |
| 1843.8 | 7  | Q04726 | K.DAPTSASVASSSS.DAPTS[166.9984]PASVASSSSTF 2    | 1.889  | 6.20E-05 | -0.004 | 0 | 50.25 | 21 | 50  | 2  | 772  | -2.44 |
| 2121.9 | 18 | Q04917 | R.DNLTWTSDDQDE.DNLTWTSDDQDEEAGEG 2              | 1.525  | 1.70E-04 | -0.003 | 0 | 45.61 | 20 | 46  | 1  | 246  | -1.33 |
| 1731.8 | 8  | Q05209 | K.DVDVSESDSPPPLR.DVDVSEDS[166.9984]PPPLPER 2    | 0.079  | 0.005    | -0.002 | 0 | 31.1  | 20 | 31  | 2  | 780  | -0.92 |
| 1604.7 | 9  | Q06210 | R.VDSTTCLFVPEEK.A VDS[166.9984]TT[160.0307]L 2  | 0.958  | 5.40E-04 | -0.003 | 0 | 40.94 | 21 | 41  | 1  | 699  | -1.6  |
| 1604.7 | 9  | Q06210 | R.VDSTTCLFVPEEK.A VDS[181.014]TT[160.0307]LF 2  | -0.141 | 0.007    | -0.003 | 0 | 29.92 | 21 | 30  | 1  | 699  | -1.6  |
| 1283.5 | 12 | Q06265 | K.APIDTSVDEEK.A APIDTS[166.9984]DVEEK 2         | 1.133  | 3.80E-04 | -0.003 | 0 | 41.69 | 20 | 42  | 2  | 439  | -2.22 |
| 4385.8 | 32 | Q06587 | R.RPIPGSDQTTTMSG.RPIPGSDQTTTMS[166.9984]GG 4    | -0.092 | 0.003    | -0.016 | 1 | 30.91 | 18 | 31  | 2  | 406  | -3.69 |
| 4305.8 | 28 | Q06587 | R.RPIPGSDQTTTMSG.RPIPGSDQTTTMSGGEPEGE 4         | 0.15   | 0.014    | -0.014 | 1 | 25.04 | 19 | 25  | 2  | 406  | -3.29 |
| 2974.1 | 17 | Q06945 | K.GDKVGGSSGGGGH.GDKVGGSS[166.9984]GGGGHG 3      | 0.173  | 0.034    | -0.008 | 1 | 20.16 | 18 | 20  | 3  | 474  | -2.65 |
| 3523.5 | 20 | Q07157 | K.VQIIVSRPDPPEVS.VQIIVSRPDPPEVS[166.9984]D 3    | 0.866  | 0.007    | -0.009 | 1 | 29.06 | 20 | 110 | 10 | 1748 | -2.55 |
| 1538.7 | 10 | Q07157 | K.SREDSLQAQPVQTK.I[S[166.9984]REDLSQAQPVQTK 2   | -0.903 | 0.042    | -0.003 | 1 | 22.33 | 21 | 110 | 10 | 1748 | -1.89 |
| 2226   | 13 | Q07157 | R.LEEPTPAPSTYSYQ.LEEPTPAPSTYS[166.9984]POA 2    | 1.978  | 1.20E-06 | -0.006 | 0 | 67.07 | 21 | 110 | 10 | 1748 | -2.82 |
| 3523.5 | 28 | Q07157 | K.VQIIVSRPDPPEVS.VQIIVSRPDPPEVS[166.9984]D 3    | 1.472  | 2.80E-04 | -0.009 | 1 | 42.84 | 20 | 129 | 10 | 1748 | -2.55 |
| 3443.5 | 21 | Q07157 | K.VQIIVSRPDPPEVS.VQIIVSRPDPPEVS[166.9984]D 3    | 1.317  | 0.002    | -0.006 | 1 | 34.52 | 21 | 129 | 10 | 1748 | -1.62 |
| 1482.7 | 7  | Q07157 | R.IDSPGFKPASQK.I[IDS[166.9984]JGFKPASQK 3       | -0.906 | 0.045    | -0.003 | 1 | 22.33 | 21 | 101 | 12 | 1748 | -2.04 |
| 3503.6 | 25 | Q07157 | K.AEASSPVYLPSETH.AEASS[166.9984]PVYLPSETHP 3    | 1.544  | 0.001    | -0.009 | 0 | 36.33 | 20 | 105 | 13 | 1748 | -2.46 |
| 1270.6 | 7  | Q07955 | K.VDGRPSVYGR.S VDGRPS[166.9984]PSYGR 2          | -0.668 | 0.025    | -0.002 | 1 | 23.68 | 20 | 24  | 4  | 248  | -1.33 |
| 3045.2 | 35 | Q08211 | K.DKDDDDGGDDDAI.DKDDDDGGDDDDAN[160.0307 3       | 1.41   | 6.50E-06 | -0.007 | 1 | 57.14 | 18 | 57  | 3  | 1270 | -2.29 |
| 1637.7 | 14 | Q08357 | K.EGALRSVDESLSK'.EGALRSV[166.9984]DES[166.5 2   | -0.92  | 0.046    | -0.005 | 1 | 21.16 | 20 | 21  | 1  | 652  | -2.93 |
| 1772.7 | 8  | Q08495 | K.STSPPPSEVWADS.ST[181.014]SPPPS[166.9984]P 2   | -0.318 | 0.011    | -0.004 | 0 | 27.18 | 20 | 27  | 1  | 405  | -2.04 |
| 1772.7 | 7  | Q08495 | K.STSPPPSEVWADS.STS[166.9984]PPPS[166.9984] 2   | 0.392  | 0.002    | -0.003 | 0 | 34.23 | 20 | 34  | 1  | 405  | -1.93 |
| 1810.6 | 8  | Q08499 | K.DSGSQVEEDTSCD.DSGS[166.9984]QVEEDTSC[16 2     | 1.33   | 2.20E-04 | -0.002 | 0 | 40.66 | 17 | 41  | 4  | 809  | -1.31 |
| 2929.1 | 13 | Q08945 | K.EGMNPSYDEYADS.EGMNPSYDEYADS[166.9984]DI 3     | 1.472  | 1.50E-04 | -0.006 | 0 | 43.06 | 17 | 43  | 3  | 709  | -2.15 |
| 3174.3 | 21 | Q08123 | R.AGEPNSPDAEANS.AGEPNS[166.9984]PDAEANS[. 4     | 0.389  | 0.016    | -0.005 | 0 | 25.58 | 20 | 140 | 6  | 767  | -1.49 |
| 3094.3 | 13 | Q08123 | R.AGEPNSPDAEANS.AGEPNSPDAEANS[166.9984]P 3      | 2.572  | 6.60E-06 | -0.008 | 0 | 60.4  | 21 | 140 | 6  | 767  | -2.62 |
| 3094.3 | 15 | Q08123 | R.AGEPNSPDAEANS.AGEPNS[166.9984]PDAEANS 3       | 2.572  | 6.80E-06 | -0.007 | 0 | 60.53 | 21 | 140 | 6  | 767  | -2.3  |
| 2181   | 11 | Q08123 | R.ETSQLSPADLTKGK.ETSQLS[166.9984]PADLTKGKPT 2   | -0.102 | 0.007    | -0.005 | 1 | 29.24 | 20 | 197 | 7  | 767  | -2.13 |
| 2041.8 | 7  | Q09161 | K.TSDANETEDHLESLI.TS[166.9984]DANETEDHLESLI 2   | #####  | 0.006    | -0.004 | 0 | 30.35 | 20 | 36  | 4  | 790  | -1.95 |
| 2169.9 | 15 | Q09161 | K.RTSDANETEDHLESLI.KTS[166.9984]DANETEDHLESLI 3 | 0.362  | 0.025    | -0.003 | 1 | 23.98 | 20 | 44  | 5  | 790  | -1.21 |
| 2041.8 | 13 | Q09161 | K.TSDANETEDHLESLI.T[181.014]SDANETEDHLESLI[. 2  | -0.457 | 0.016    | -0.004 | 0 | 25.65 | 20 | 28  | 6  | 790  | -1.95 |
| 2712.2 | 17 | Q09472 | K.TEKEEDQPSATST.TEKEEDQPSATSTQSS[166.998 3      | 0.416  | 0.02     | -0.009 | 1 | 25.51 | 21 | 26  | 2  | 2414 | -3.22 |
| 1230.5 | 12 | Q09666 | K.DIDISSPEFK.I DIDISS[166.9984]PEFK 2           | -0.789 | 0.03     | -0.002 | 0 | 21.47 | 19 | 416 | 19 | 5890 | -1.51 |
| 1802.8 | 12 | Q09666 | R.LPSGSGAASPTGSA.LPS[166.9984]GSAASPT[181.0 2   | 1.978  | 2.90E-05 | -0.004 | 0 | 53.21 | 20 | 416 | 19 | 5890 | -2.02 |
| 1722.8 | 12 | Q09666 | R.LPSGSGAASPTGSA.LPS[166.9984]GSAASPTGSAV 2     | 2.732  | 3.90E-06 | -0.004 | 0 | 62.12 | 21 | 416 | 19 | 5890 | -2.33 |
| 989.47 | 6  | Q09666 | K.AEAPLPSK.L AEAPLPS[166.9984]PK 2              | -0.011 | 0.005    | -0.002 | 0 | 32.25 | 21 | 416 | 19 | 5890 | -1.72 |
| 1812.8 | 14 | Q09666 | K.ASLGSEGEAEAEA.ASLGS[166.9984]LEGEAEAEAS 2     | 2.315  | 2.30E-05 | -0.003 | 0 | 54.51 | 21 | 416 | 19 | 5890 | -1.79 |
| 1838.9 | 19 | Q09666 | K.VSVPADLSEASE.VSVPADLSEASEGS[166.9984 2        | -0.757 | 0.027    | -0.003 | 0 | 23.79 | 21 | 416 | 19 | 5890 | -1.68 |
| 1413.6 | 9  | Q09666 | K.GVGTSPSEASIS.GVGTSP[166.9984]PEASISGSK 2      | 2.732  | 7.30E-06 | -0.002 | 0 | 60.45 | 22 | 416 | 19 | 5890 | -1.65 |
| 1892.8 | 11 | Q09666 | K.ASLGSEGEAEAEA.ASLGS[166.9984]LEGEAEAEAS 2     | 1.978  | 1.10E-06 | -0.004 | 0 | 66.48 | 19 | 416 | 19 | 5890 | -2.25 |
| 1812.8 | 11 | Q09666 | K.ASLGSEGEAEAEA.ASLGS[166.9984]LEGEAEAEAS 2     | 2.305  | 2.30E-05 | -0.003 | 0 | 54.41 | 21 | 416 | 19 | 5890 | -1.73 |
| 1722.8 | 13 | Q09666 | R.LPSGSGAASPTGSA.LPSGSGAAS[166.9984]PTGSAV 2    | 1.978  | 7.40E-06 | -0.004 | 0 | 59.52 | 21 | 416 | 19 | 5890 | -2.16 |
| 1569.7 | 11 | Q09666 | K.ISMQDVLDSLSPK.ISMQDVLDSLGS[166.9984]PK 2      | 2.735  | 6.00E-08 | -0.002 | 0 | 80.31 | 21 | 506 | 19 | 5890 | -1.27 |
| 1899.8 | 9  | Q09666 | R.LKXSDGVEGDLGET.LKS[166.9984]EDGVEGDLGETQ 3    | 1.472  | 0.001    | -0.004 | 1 | 37.86 | 20 | 461 | 24 | 5890 | -2.02 |
| 1802.8 | 12 | Q09666 | R.LPSGSGAASPTGSA.LPS[166.9984]GSAAS[166.99 2    | 0.635  | 0.001    | -0.004 | 0 | 36.68 | 20 | 461 | 24 | 5890 | -2.02 |
| 1912.8 | 20 | Q09666 | R.DDGVFVQEVQNS.DDGVFVQEVQNS[166.9984]P. 2       | 0.536  | 0.002    | -0.003 | 0 | 35.62 | 20 | 504 | 23 | 5890 | -2.01 |
| 1566.7 | 6  | Q09666 | K.GDRSPGQWTWR.GDRS[166.9984]PEPGQWTWR 2         | 0.021  | 0.005    | -0.003 | 1 | 31.54 | 21 | 461 | 24 | 5890 | -1.72 |
| 1574.6 | 8  | Q09666 | K.GHYEVTGSDDET.GHYEVTGS[166.9984]DDETG 3        | 0.548  | 0.016    | -0.004 | 0 | 23.83 | 18 | 396 | 18 | 5890 | -2.25 |
| 1892.8 | 13 | Q09666 | K.ASLGSEGEAEAEA.AS[166.9984]LSLEGEAEAEAS 2      | 1.169  | 3.80E-04 | -0.004 | 0 | 40.91 | 19 | 392 | 21 | 5890 | -2.25 |
| 1722.8 | 9  | Q09666 | R.LPSGSGAASPTGSA.LPSGS[166.9984]GAASPTGSAV 2    | 2.429  | 1.80E-05 | -0.004 | 0 | 55.51 | 21 | 392 | 21 | 5890 | -2.33 |
| 1553.7 | 7  | Q09666 | R.ISMSEVDLNVAAK.IS[166.9984]MSEVDLNVAAK 2       | 1.617  | 1.20E-04 | -0.002 | 0 | 47.5  | 21 | 461 | 24 | 5890 | -1.39 |
| 3974.7 | 20 | Q0J829 | K.DAESVECPDADSL.DAESVE[160.0307]PDADS[16 3      | 1.41   | 8.00E-10 | -0.006 | 1 | 97.89 | 19 | 98  | 4  | 810  | -1.53 |
| 1969.7 | 20 | Q12789 | R.KNSSTDQGSDEEGS.KNS[166.9984]TDQGS[166.99 2    | 1.978  | 1.60E-05 | -0.003 | 1 | 52.76 | 17 | 82  | 6  | 2109 | -1.44 |
| 3121.3 | 21 | Q12789 | R.EDPQARPLEGSSSEI.EDPQARPLEGSSSESDPPEGQAP 3     | 0.631  | 0.011    | -0.008 | 1 | 27.71 | 21 | 82  | 6  | 2109 | -2.54 |
| 2425   | 15 | Q12789 | R.PLEGGSSSDSPPGK.PLEGGSSSDSPPGQAPPSS[16 3       | 2.631  | 4.00E-05 | -0.005 | 0 | 51.74 | 20 | 133 | 8  | 2109 | -2.24 |
| 1969.7 | 11 | Q12789 | R.KNSSTDQGSDEEGS.KNS[166.9984]TDQGS[166.99 2    | 0.253  | 0.003    | -0.003 | 1 | 29.86 | 17 | 133 | 8  | 2109 | -1.44 |
| 1969.7 | 12 | Q12789 | R.KNSSTDQGSDEEGS.KNS[181.014]DQGS[166.998 3     | 1.41   | 9.60E-04 | -0.003 | 1 | 35.08 | 17 | 82  | 6  | 2109 | -1.34 |
| 1761.1 | 11 | Q12789 | R.KNSSTDQGSDEEGS.KNS[166.9984]DEEGSLQ 2         | 2.14   | 2.20E-05 | -0.005 | 0 | 53.38 | 19 | 134 | 6  | 2109 | -3.1  |
| 1900.8 | 10 | Q12797 | K.LGIYDADGGDDFD.LGIYDADGGDDFDVDDAK 2            | 2.735  | 2.00E-07 | -0.005 | 0 | 75.2  | 21 | 75  | 4  | 758  | -2.7  |
| 3938.8 | 21 | Q12797 | R.STSEPAVPEEAEPI.STSEPAVPEEAEPIHEPEEQVPI 3      | 0.583  | 0.014    | -0.006 | 0 | 26.16 | 20 | 84  | 4  | 758  | -1.63 |
| 2366.9 | 7  | Q12802 | R.DMAECTPLPDCS.DMAEC[160.0307]STPLPDC[1 3       | 1.048  | 0.048    | -0.008 | 1 | 18.88 | 18 | 19  | 4  | 2813 | -2.42 |
| 2366.9 | 13 | Q12802 | R.DMAECTPLPDCS.DMAEC[160.0307]STPLPDC[1 3       | 1.668  | 0.001    | -0.006 | 0 | 35.68 | 18 | 42  | 4  | 2813 | -2.42 |
| 2446.9 | 12 | Q12802 | R.DMAECTPLPDCS.DMAEC[160.0307]STPLPDC[1 3       | 0.627  | 0.011    | -0.005 | 0 | 23.67 | 17 | 42  | 4  | 2813 | -2.23 |
| 2366.9 | 10 | Q12802 | R.DMAECTPLPDCS.DMAEC[160.0307]STPLPDC[1 3       | 1.655  | 1.80E-04 | -0.006 | 0 | 43.1  | 18 | 43  | 3  | 2813 | -2.42 |
| 3197.3 | 21 | Q12830 | R.QEQSPNANNDQPE.QEQS[166.9984]PNANNDQPED 3      | 1.724  | 8.70E-04 | -0.006 | 0 | 38.64 | 21 | 39  | 3  | 3046 | -1.83 |
| 2287   | 17 | Q12846 | K.AIEPQKEADENYN.AIEPQKEADENYS[166.9984] 2       | -0.398 | 0.015    | -0.003 | 1 | 27.33 | 21 | 27  | 1  | 297  | -1.43 |
| 2620.1 | 18 | Q12857 | R.SPGSGSSQSGWHE.S[166.9984]PGSGSSQSGWHEV 3      | 0.171  | 0.035    | -0.006 | 0 | 23.04 | 21 | 23  | 3  | 509  | -2.19 |
| 3022.2 | 12 | Q12872 | K.SGVSDNEDDDDEI.SGVSS[166.9984]DNEDDDDEI 3      | 1.41   | 4.70E-06 | -0.007 | 0 | 59.84 | 19 | 110 | 4  | 951  | -2.2  |
| 1689.6 | 10 | Q12872 | R.VKLDDDDDDDEES.VKLDDDS[166.9984]DDDEESK 2      | 1.982  | 2.10E-06 | -0.004 | 1 | 61.49 | 17 | 90  | 4  | 951  | -2.05 |
| 3022.2 | 8  | Q12872 | K.SGVSDNEDDDDEI.SGVSS[166.9984]DNEDDDDEI 3      | 1.544  | 9.10E-05 | -0.007 | 0 | 47    | 19 | 90  | 5  | 951  | -2.2  |
| 1917.7 | 13 | Q12873 | K.METEADAPSPAPSL.METEADAPS[166.9984]PAPS[1 2    | -0.087 | 0.006    | -0.005 | 0 | 29.49 | 20 | 148 | 9  | 2000 | -2.54 |
| 2413   | 11 | Q12873 | K.METEADAPSPAPSL.METEADAPS[166.9984]PAPS[1 3    | 1.207  | 0.003    | -0.004 | 1 | 33.47 | 21 | 148 | 9  | 2000 | -1.74 |
| 2258.9 | 6  | Q12873 | R.KNDMDPEPPLDYG.KNDMDPEPPLDYGSS[166.9984] 2     | 0.985  | 5.60E-04 | -0.005 | 1 | 39.21 | 19 | 148 | 9  | 2000 | -2.13 |
|        |    |        |                                                 |        |          |        |   |       |    |     |    |      |       |

|         |    |             |                                                  |   |        |          |           |   |       |    |     |    |      |       |
|---------|----|-------------|--------------------------------------------------|---|--------|----------|-----------|---|-------|----|-----|----|------|-------|
| 1619.7  | 14 | Q13112      | R.TQDPPSSGTPPQA QDPPSS[166.9984]PGTTPPQAR        | 2 | 0.605  | 0.001    | -0.004    | 0 | 38.41 | 22 | 37  | 4  | 559  | -2.42 |
| 1631.8  | 8  | Q13112      | R.GSSPGRPRVEGTPA GSS[166.9984]PGPRPRVEGTPAS      | 3 | 0.218  | 0.029    | -0.004    | 1 | 24.51 | 22 | 25  | 3  | 559  | -2.41 |
| 3846.8  | 28 | Q13112      | K.TDTPSSVPTSVIST TDTPSSVPTSVISTPSTEEIQSETP       | 3 | 0.626  | 0.012    | -0.007    | 0 | 27.61 | 21 | 26  | 4  | 559  | -1.83 |
| 1631.8  | 16 | Q13112      | R.GSSPGRPRVEGTPA GS[166.9984]SGPRPRVEGTPAS       | 3 | 0.944  | 0.005    | -0.004    | 1 | 31.87 | 22 | 32  | 2  | 559  | -2.41 |
| 1161.5  | 11 | Q13177      | K.YLFTTPEK.D YLS[166.9984]FTTPEK                 | 2 | -0.139 | 0.007    | -0.002    | 0 | 29.97 | 21 | 30  | 3  | 524  | -1.68 |
| 1552.6  | 7  | Q13185      | R.LTWHSCPEDEAQ.. LTWH[166.9984][160.0307]J       | 2 | -0.827 | 0.036    | -0.003    | 0 | 20.02 | 18 | 20  | 3  | 183  | -1.86 |
| 2587    | 14 | Q13188      | R.ELEEEENSDSEDEL ELEEEENS[166.9984]DEDELDS       | 3 | 0.625  | 0.012    | -0.006    | 0 | 25.6  | 19 | 26  | 1  | 491  | -2.23 |
| 2298.1  | 24 | Q13200      | K.APVQOQQAAPAA APVQOQQA[166.9984]PAAAPG          | 3 | 2.384  | 2.20E-04 | -0.006    | 1 | 45.24 | 21 | 45  | 1  | 908  | -2.47 |
| 1928.9  | 14 | Q13200      | K.APVQOQQAAPAA APVQOQQA[166.9984]PAAAPG          | 2 | 2.085  | 4.20E-06 | -0.004    | 0 | 61.73 | 20 | 104 | 3  | 908  | -2.1  |
| 1614.6  | 7  | Q13242      | R.GSPHYFSPFR.. GS[166.9984]PHYFS[166.9984]2      | 2 | -0.861 | 0.041    | -0.002    | 1 | 20.7  | 19 | 21  | 1  | 221  | -1.56 |
| 1202.6  | 6  | Q13247      | R.SNSPLVPPPSK.A SNS[166.9984]PLVPPPSK            | 2 | -0.047 | 0.005    | -0.002    | 0 | 30.89 | 21 | 44  | 3  | 344  | -1.97 |
| 1110.6  | 6  | Q13247_Q081 | R.LUVENLSR.C LUVENLS[166.9984]R                  | 2 | -0.421 | 0.013    | -0.002    | 0 | 27.05 | 21 | 56  | 6  | 835  | -1.83 |
| 3638.7  | 16 | Q13263      | R.LASPSGSSGLEVV LAS[166.9984]PSGSSGLEVVA         | 3 | 0.669  | 0.012    | -0.009    | 0 | 27.09 | 20 | 73  | 6  | 835  | -2.41 |
| 1201.5  | 12 | Q13263      | R.SGEGVSGLMR.K S[166.9984]GEGVSGLMR              | 2 | 1.097  | 4.30E-04 | -0.002    | 0 | 39.33 | 18 | 73  | 6  | 835  | -1.8  |
| 3718.6  | 11 | Q13263      | R.LASPSGSSGLEVV LASPS[166.9984]T[181.014]        | 3 | 1.41   | 4.50E-04 | -0.007    | 0 | 41.38 | 20 | 73  | 6  | 835  | -1.91 |
| 4865.9  | 14 | Q13263      | K.AATDAQDANQCCT AATDAQDANQC[160.0307]C[14        | 4 | 0.038  | 0.026    | -0.006    | 0 | 20.35 | 17 | 73  | 6  | 835  | -1.28 |
| 3638.7  | 14 | Q13263      | R.LASPSGSSGLEVV LASPS[166.9984]GSSGLEVVA         | 3 | 0.745  | 0.01     | -0.009    | 0 | 27.8  | 20 | 69  | 6  | 835  | -2.41 |
| 3718.6  | 13 | Q13263      | R.LASPSGSSGLEVV LAS[166.9984]PS[166.9984]GS      | 3 | 1.472  | 6.10E-04 | -0.007    | 0 | 40.01 | 20 | 69  | 6  | 835  | -1.91 |
| 3718.6  | 9  | Q13263      | R.LASPSGSSGLEVV LASPSGSS[166.9984]S              | 3 | 0.159  | 0.039    | -0.007    | 0 | 21.94 | 20 | 69  | 8  | 835  | -1.91 |
| 3638.7  | 24 | Q13263      | R.LASPSGSSGLEVV LASPSGSS[166.9984]GLEVVA         | 3 | 1.254  | 0.003    | -0.009    | 0 | 32.9  | 20 | 61  | 5  | 835  | -2.41 |
| 1444.6  | 9  | Q13263      | R.SRSGEGVSGLMR.J SRS[166.9984]GEGVSGLMR          | 2 | 0.245  | 0.003    | -0.002    | 1 | 32.71 | 20 | 87  | 8  | 835  | -1.45 |
| 3638.7  | 25 | Q13263      | R.LASPSGSSGLEVV LASPSGSS[166.9984]TSSGLEVVA      | 3 | 2.688  | 5.20E-05 | -0.009    | 0 | 50.51 | 20 | 98  | 6  | 835  | -2.41 |
| 3296.3  | 28 | Q13283      | R.YQDEVGGFVTEPC YQDEVGGFVTEPQES[166.9984]        | 4 | 0.345  | 0.016    | -0.005    | 0 | 26.14 | 21 | 52  | 4  | 466  | -1.53 |
| 1964.9  | 17 | Q13283      | K.SSSPAPADIAQTVQ SSS[166.9984]PAPADIAQTVQE       | 3 | 0.27   | 0.025    | 5.00E-04  | 0 | 24.1  | 21 | 52  | 4  | 466  | 0.27  |
| 1964.9  | 16 | Q13283      | K.SSSPAPADIAQTVQ S[166.9984]SSPAPADIAQTVQE       | 3 | 1.323  | 0.002    | 5.00E-04  | 0 | 34.58 | 21 | 162 | 6  | 466  | 0.27  |
| 1658.7  | 8  | Q13286      | R.FSDSEGEETVPEPR FSDS[166.9984]EGETVPEPR         | 2 | -0.324 | 0.01     | -0.004    | 0 | 27.12 | 20 | 76  | 3  | 438  | -2.14 |
| 1814.8  | 20 | Q13286      | R.RFSDSEGEETVPEPR RFS[166.9984]DSEGEETVPEPR      | 2 | 2.732  | 1.50E-06 | -0.004    | 1 | 65.89 | 20 | 76  | 3  | 438  | -2.51 |
| 3124.4  | 23 | Q13425      | K.KPSVSLDLPWEGA.K KPSVSLDLPWEGAAPQS[166.9984]    | 3 | 0.359  | 0.021    | -0.007    | 1 | 24.95 | 21 | 50  | 5  | 540  | -2.33 |
| 1401.7  | 10 | Q13425      | R.GPAGAGASPPVR.G GPAGAGAS[166.9984]PPVRR         | 2 | -0.7   | 0.026    | -0.003    | 1 | 25.33 | 22 | 62  | 6  | 540  | -1.95 |
| 3204.4  | 23 | Q13425      | K.KPSVSLDLPWEGA.K KPSVSLDLPWEGAAPQSPSFGS         | 3 | 1.518  | 0.002    | -0.006    | 1 | 36.51 | 21 | 128 | 7  | 540  | -1.87 |
| 3204.4  | 22 | Q13425      | K.KPSVSLDLPWEGA.K KPSVSLDLPWEGAAPQS[166.9984]    | 3 | 0.926  | 0.006    | -0.006    | 1 | 30.61 | 21 | 62  | 6  | 540  | -1.87 |
| 3124.4  | 27 | Q13425      | K.KPSVSLDLPWEGA.K KPSVSLDLPWEGAAPQSPSFGS         | 3 | 1.655  | 4.30E-05 | -0.007    | 1 | 51.83 | 21 | 63  | 5  | 540  | -2.23 |
| 1245.6  | 8  | Q13425      | R.GPAGAGASPPVR.G GPAGAGAS[166.9984]PPVRR         | 2 | 0.324  | 0.002    | -0.002    | 0 | 34.64 | 21 | 63  | 5  | 540  | -1.47 |
| 3204.4  | 18 | Q13425      | K.KPSVSLDLPWEGA.K KPSVSLDLPWEGAAPQSPSFGS         | 3 | 1.323  | 0.002    | -0.006    | 1 | 34.63 | 21 | 32  | 4  | 540  | -1.87 |
| 1222.6  | 8  | Q13425      | R.GLPPSPAPP.PR.G GLPPS[166.9984]PPAPP            | 2 | 1.954  | 5.40E-05 | -0.003    | 0 | 50.8  | 21 | 128 | 7  | 540  | -2.2  |
| 1831.6  | 14 | Q13427      | K.KFDHESPQDDEK.K KFDHES[166.9984]S[166.9984]2    | 2 | -0.475 | 0.014    | -0.002    | 1 | 19.54 | 14 | 20  | 3  | 754  | -1.17 |
| 2558.1  | 9  | Q13428      | R.SSSESEDEDVIPAT SSSSES[166.9984]EDEDVIPATQ      | 2 | 1.911  | 6.20E-05 | -0.003    | 0 | 50.47 | 21 | 194 | 9  | 1488 | -1.24 |
| 2830.2  | 20 | Q13428      | K.SAEPANTLTVSETE SAEPANTLTVSE[181.014]EEE        | 3 | 0.073  | 0.047    | -0.006    | 0 | 22.03 | 21 | 194 | 9  | 1488 | -2.01 |
| 1467.6  | 12 | Q13428      | K.LGAGEGGEASVPE LGAGEGGEASV[166.9984]PEK         | 2 | 1.767  | 8.20E-05 | -0.003    | 0 | 49.03 | 21 | 194 | 9  | 1488 | -2.23 |
| 1442.7  | 11 | Q13428      | K.LDSSPSVSTLAAK.I LDSS[166.9984]PSVSTLAAK        | 2 | 1.985  | 4.70E-05 | -0.003    | 0 | 50.65 | 20 | 124 | 7  | 1488 | -2.16 |
| 1595.7  | 14 | Q13428      | K.KLAGEGGEASVSP.KLAGEGGEASV[166.9984]PE          | 2 | 0.737  | 9.90E-04 | -0.004    | 1 | 38.63 | 21 | 142 | 9  | 1488 | -2.4  |
| 2830.18 | 18 | Q13428      | K.SAEPANTLTVSETE SAEPANTLTV[166.9984]ETEE        | 3 | 2.672  | 1.20E-04 | -0.006    | 0 | 48.05 | 21 | 142 | 9  | 1488 | -2.01 |
| 3995.8  | 23 | Q13428      | K.QDDSGSSSESDSD QDDSGSS[166.9984]EESDSDG         | 3 | 1.394  | 1.40E-04 | -0.003    | 1 | 43.93 | 18 | 209 | 9  | 1488 | -0.8  |
| 1467.6  | 13 | Q13428      | K.LGAGEGGEASVPE LGAGEGGEAS[166.9984]VPEK         | 2 | 2.319  | 2.30E-05 | -0.003    | 0 | 54.5  | 21 | 132 | 8  | 1488 | -2.23 |
| 2558.1  | 20 | Q13428      | R.SSSESEDEDVIPAT S[166.9984]SSSESEDEDVIPATQ      | 2 | -0.114 | 0.007    | -0.003    | 0 | 30.22 | 21 | 190 | 7  | 1488 | -1.24 |
| 3995.8  | 13 | Q13428      | K.QDDSGSSSESDSD QDDSGSSSESDS[166.9984]DG         | 3 | 1.559  | 2.80E-05 | -0.003    | 1 | 51.09 | 18 | 190 | 7  | 1488 | -0.8  |
| 2681.3  | 20 | Q13428      | R.TQPSGSDVAVGTL TQPSGSDVAVGTLPTS[166.9984]       | 3 | 1.031  | 0.004    | -0.005    | 0 | 30.64 | 20 | 142 | 9  | 1488 | -1.75 |
| 2534    | 15 | Q13428      | R.VDPSSTSESEEEEE VDPSSTSES[166.9984]SEEEEE2      | 2 | 1.704  | 1.10E-04 | -3.00E-04 | 0 | 46.26 | 19 | 249 | 10 | 1488 | -0.14 |
| 1407.6  | 6  | Q13433      | K.YESQLSTNEEK.V YESQL[181.014]NEEK               | 2 | -0.571 | 0.017    | -0.002    | 0 | 25.65 | 21 | 26  | 2  | 755  | -1.85 |
| 1407.6  | 10 | Q13433      | K.YESQLSTNEEK.V YESQL[166.9984]NEEK              | 2 | -0.338 | 0.01     | -0.003    | 0 | 27.88 | 21 | 28  | 1  | 755  | -1.85 |
| 2442.2  | 8  | Q13435      | K.KIEEAMDSGETPQL KIEEAMDSGET[181.014]PQLFT       | 3 | 1.187  | 0.003    | -0.004    | 1 | 32.27 | 20 | 104 | 3  | 895  | -1.46 |
| 2100.8  | 9  | Q13435      | R.SSLGQSASETEEDT.SSLGQS[166.9984]AS[166.9984]2   | 2 | -0.111 | 0.007    | -0.005    | 0 | 29.25 | 20 | 104 | 3  | 895  | -2.35 |
| 2020.9  | 11 | Q13435      | R.SSLGQSASETEEDT.SSLGQSAS[166.9984]EETEDTVS      | 2 | 2.732  | 1.20E-07 | -0.005    | 0 | 77.65 | 21 | 104 | 3  | 895  | -2.29 |
| 2580.10 | 10 | Q13435      | K.GFEEHKDSDDDSS GFEEHKDS[166.9984]DDSDS[1]       | 3 | 0.309  | 0.023    | -0.005    | 1 | 16.44 | 13 | 90  | 3  | 895  | -1.98 |
| 1761.7  | 10 | Q13439      | R.TSFTTEQLDEGTPNR.TS[166.9984]TEQLDEGTPNR        | 2 | -0.018 | 0.006    | -0.003    | 0 | 30.18 | 20 | 91  | 3  | 2230 | -1.94 |
| 2096.9  | 14 | Q13439      | K.EENPESDGEVVED EENPES[166.9984]GEPVVEDG         | 2 | 1.985  | 1.50E-06 | -0.006    | 0 | 65.63 | 20 | 93  | 3  | 2230 | -2.98 |
| 1761.7  | 11 | Q13439      | R.TSFTTEQLDEGTPNR.TS[166.9984]SFTTEQLDEGTPNR     | 2 | 1.939  | 6.30E-05 | -0.003    | 0 | 49.7  | 20 | 50  | 4  | 2230 | -1.94 |
| 2191.7  | 12 | Q13442      | K.SLDSDESEDEEDDY.SLDS[166.9984]DES[166.9984]2    | 2 | 1.978  | 4.40E-06 | -0.005    | 0 | 56.27 | 15 | 132 | 4  | 181  | -2.35 |
| 2111.7  | 15 | Q13442      | K.SLDSDESEDEEDDY.SLDS[166.9984]DESEDEEDDYQ       | 2 | 1.978  | 4.90E-06 | -0.005    | 0 | 57.94 | 17 | 132 | 4  | 181  | -2.33 |
| 2111.7  | 9  | Q13442      | K.SLDSDESEDEEDDY.SLDS[166.9984]DEEDDYQ           | 2 | 1.978  | 2.80E-05 | -0.003    | 0 | 50.23 | 17 | 132 | 4  | 181  | -1.62 |
| 2191.7  | 8  | Q13442      | K.SLDSDESEDEEDDY.SLDS[166.9984]LDSDES[166.9984]2 | 2 | 1.985  | 4.50E-06 | -0.005    | 0 | 56.11 | 15 | 90  | 4  | 181  | -2.35 |
| 2319.8  | 15 | Q13442      | K.SLDSDESEDEEDD.SLDS[166.9984]DES[166.9984]2     | 2 | 1.223  | 2.90E-04 | -0.005    | 1 | 39.49 | 17 | 86  | 3  | 181  | -2.11 |
| 2319.8  | 16 | Q13442      | K.SLDSDESEDEEDD.KS[166.9984]LDSDES[166.9984]3    | 2 | 0.363  | 0.022    | -0.006    | 1 | 20.98 | 17 | 90  | 4  | 181  | -2.55 |
| 1069.5  | 4  | Q13443      | R.HVSPVTPPR.E HVSP[166.9984]VTPPR                | 2 | 0.06   | 0.004    | -0.002    | 0 | 30.96 | 20 | 31  | 1  | 819  | -2.08 |
| 1806.8  | 17 | Q13459      | R.VQEKDPSGGSTQJ VQEKDPS[166.9984]GGSTQJC         | 3 | 1.31   | 0.002    | -0.003    | 1 | 35.5  | 22 | 36  | 7  | 2157 | -1.65 |
| 1536.7  | 11 | Q13492      | R.ITAAQHSVTSQSAV ITAAQHSVT[181.014]GSAVSK        | 2 | 0.857  | 7.60E-04 | -0.004    | 0 | 38.88 | 20 | 39  | 3  | 652  | -2.9  |
| 1570.7  | 5  | Q13501      | R.LTPVSPSSSTEEK.S LTPVSP[166.9984]PSSSSTEEK      | 2 | -0.06  | 0.006    | -0.003    | 0 | 29.76 | 20 | 100 | 8  | 400  | -1.95 |
| 3606.15 | 15 | Q13501      | K.EVDPSTGELQSLQV.EVDPSTGELQSLQVPESEGPS           | 3 | 1.41   | 3.50E-06 | -0.007    | 0 | 62.31 | 20 | 100 | 8  | 400  | -1.99 |
| 3559.4  | 13 | Q13501      | K.IALESEGRPEEQME.IALESEGRPEEQMESDNC[160.03]      | 3 | 0.723  | 0.011    | -0.009    | 1 | 26.63 | 19 | 100 | 8  | 400  | -2.5  |
| 1813.8  | 13 | Q13501      | R.SRLTPVSPSSSTEEK.SRLT[181.014]VSPSSSSTEEK       | 2 | -0.158 | 0.008    | -0.005    | 1 | 28.78 | 20 | 100 | 8  | 400  | -2.92 |
| 3606.6  | 31 | Q13501      | K.EVDPSTGELQSLQV.EVDPSTGELQSLQVPESEGPS[1         | 4 | 1.449  | 0.002    | -0.006    | 0 | 36.24 | 20 | 121 | 10 | 400  | -1.65 |
| 3639.4  | 17 | Q13501      | K.IALESEGRPEEQME.IALESEGRPEEQMES[166.9984]C      | 3 | 0.746  | 0.01     | -0.008    | 1 | 25.82 | 18 | 121 | 10 | 400  | -2.26 |
| 1570.7  | 11 | Q13501      | R.LTPVSPSSSTEEK.S LTPVSP[166.9984]SSSTEEK        | 2 | 1.033  | 4.80E-04 | -0.003    | 0 | 40.66 | 20 | 96  | 7  | 400  | -1.95 |
| 1813.8  | 14 | Q13501      | R.SRLTPVSPSSSTEEK.SRLT[166.9984]LTPVSPSSSTEEK    | 3 | 0.138  | 0.041    | -0.004    | 1 | 21.72 | 20 | 118 | 7  | 400  | -2.21 |
| 3606.6  | 11 | Q13501      | K.EVDPSTGELQSLQV.EVDPSTGELQSLQVPESEGPS[166.9984] | 3 | 0.15   | 0.025    | -0.006    | 0 | 23.95 | 20 | 133 | 10 | 400  | -1.65 |
| 3606.15 | 10 | Q13501      | K.EVDPSTGELQSLQV.EVDPSTGELQSLQVPESEGPS[16        | 4 | 1.823  | 6.40E-04 | -0.006    | 0 | 39.88 | 20 | 146 | 10 | 400  | -1.65 |
| 2862.1  | 26 | Q13501      | R.RFSFCCSPEAEAE RFSF[160.0307]C[160.0307]S       | 3 | 0.794  | 0.009    | -0.006    | 1 | 27.29 | 19 | 146 | 10 | 400  | -2.21 |
| 3686.6  | 27 | Q13501      | K.EVDPSTGELQSLQV.EVDPSTGELQSLQVPESEGPS[16        | 3 | 1.559  | 0.001    | -0.004    | 0 | 37.98 | 21 | 133 | 10 | 400  | -1.16 |
| 2517.1  | 25 | Q13523      | K.LCDFGSASHVADN.LC[160.0307]DFGSASHVADNDI        | 3 | 1.362  | 0.002    | -0.004    | 0 | 34.02 | 20 | 102 | 9  | 1007 | -1.78 |
| 3534.3  | 28 | Q1352       |                                                  |   |        |          |           |   |       |    |     |    |      |       |

|        |    |        |                                                  |        |          |           |   |       |    |     |    |      |       |
|--------|----|--------|--------------------------------------------------|--------|----------|-----------|---|-------|----|-----|----|------|-------|
| 2200.8 | 12 | Q13895 | R.MPQDGSDEEVEV MPQDGS[166.9984]DDEEVEWI 3        | 0.928  | 0.007    | -0.004    | 0 | 28.68 | 19 | 103 | 4  | 437  | -1.59 |
| 1648.7 | 10 | Q14004 | R.GGDVSPSPYSSSSA GGDVSP[166.9984]PSYSSSSWR 2     | 1.307  | 2.70E-04 | -0.003    | 0 | 43.43 | 20 | 43  | 5  | 2012 | -2.07 |
| 3008.2 | 24 | Q14008 | K.HSTSGTDEGEDGDF HSTSGT[181.014]DEGEDGDFE 3      | 0.199  | 0.031    | -0.007    | 0 | 21.33 | 19 | 21  | 1  | 1532 | -2.27 |
| 2051.8 | 12 | Q14103 | K.IDASKNEEDEGHSN IDASKNEEDEGHSNS[166.9984] 2     | 1.379  | 2.20E-04 | -0.003    | 1 | 44.15 | 20 | 53  | 4  | 355  | -1.49 |
| 2131.8 | 15 | Q14103 | K.IDASKNEEDEGHSN IDASKNEEDEGHSNS[166.9984] 3     | 0.065  | 0.042    | -0.003    | 1 | 20.05 | 19 | 53  | 4  | 355  | -1.44 |
| 2051.8 | 18 | Q14103 | K.IDASKNEEDEGHSN IDASKNEEDEGHSNS[166.9984] 3     | 0.731  | 0.01     | -0.002    | 1 | 27.71 | 20 | 53  | 4  | 355  | -0.9  |
| 2131.8 | 20 | Q14103 | K.IDASKNEEDEGHSN IDASKNEEDEGHSNS[166.9984] 3     | 0.112  | 0.037    | -0.003    | 1 | 20.48 | 19 | 33  | 4  | 355  | -1.21 |
| 2131.8 | 16 | Q14103 | K.IDASKNEEDEGHSN IDASKNEEDEGHSNS[166.9984] 3     | 0.018  | 0.046    | -0.003    | 1 | 19.53 | 19 | 50  | 2  | 355  | -1.21 |
| 2002.7 | 15 | Q14137 | R.IGDEYAEADSDDEED I GDEYAEAD[166.9984]S[166.95 2 | 1.45   | 2.00E-04 | -0.005    | 0 | 40.86 | 16 | 29  | 2  | 746  | -2.7  |
| 3399.4 | 28 | Q14147 | R.LQEEDQDGGSDDED LQEEDQDGS[166.9984]S[166.9 3    | 0.934  | 0.005    | -0.007    | 1 | 29.7  | 20 | 30  | 1  | 1143 | -2.04 |
| 2692.1 | 12 | Q14157 | K.STSAPQMSPGSSD STSAPQMSPGSS[166.9984]DN 3       | 1.006  | 0.005    | -0.009    | 0 | 29.46 | 19 | 29  | 3  | 1087 | -3.21 |
| 2612.1 | 17 | Q14157 | K.STSAPQMSPGSSD STSAPQMSPGSS[166.9984]DN 3       | 1.665  | 0.001    | -0.007    | 0 | 36.98 | 20 | 69  | 6  | 1087 | -2.73 |
| 2612.1 | 13 | Q14157 | K.STSAPQMSPGSSD STSAPQMSPGSS[166.9984]PGSSDN 3   | 0.372  | 0.023    | -0.007    | 0 | 24.15 | 20 | 39  | 7  | 1087 | -2.73 |
| 2040   | 11 | Q14157 | K.SPAVATSTAAPPSP SPAVATSTAAPPSPSS[166.9984] 2    | 0.581  | 0.001    | -0.005    | 0 | 36.07 | 20 | 69  | 6  | 1087 | -2.5  |
| 1416.7 | 12 | Q14157 | R.RYPSSISSPQK.D RYPSSISS[166.9984]SSPQK 2        | -0.24  | 0.006    | -0.003    | 1 | 30.02 | 20 | 69  | 6  | 1087 | -1.87 |
| 1300.6 | 11 | Q14160 | R.NLSIESSIDR.E NLS[166.9984]LESISSIDR 2          | 1.449  | 1.70E-04 | -0.002    | 0 | 45.85 | 21 | 140 | 13 | 1630 | -1.4  |
| 2424   | 19 | Q14160 | R.RSEACPCQDPSGSP RSEAC[160.0307]PC[160.0307] 2   | 1.658  | 1.00E-04 | -0.008    | 1 | 46.94 | 20 | 140 | 13 | 1630 | -3.3  |
| 2964.2 | 20 | Q14160 | K.MAESPCSPGQQP MAESPC[160.0307]SPGQQQP 3         | 1.41   | 5.10E-04 | -0.005    | 0 | 39.32 | 19 | 140 | 13 | 1630 | -1.65 |
| 3148.4 | 19 | Q14160 | R.LALDGETLGEQEEL LALDGETLGEQEEDQPPWAS[1 3        | 0.663  | 0.012    | -0.005    | 0 | 26.99 | 20 | 167 | 18 | 1630 | -1.72 |
| 3044.2 | 21 | Q14160 | K.MAESPCSPGQQP MAESPC[160.0307]S[166.9984] 3     | 0.345  | 0.023    | -0.011    | 0 | 22.81 | 19 | 167 | 18 | 1630 | -1.88 |
| 4174.9 | 17 | Q14160 | R.LAEAPSPAPTPSPF LAEAPSPAPTPSPFVLDLGPQT 5 4      | 0.246  | 0.005    | -0.008    | 1 | 27.74 | 17 | 167 | 18 | 1630 | -3.53 |
| 2195   | 13 | Q14160 | R.NLSIESSIDRELSPE NLSIESS[166.9984]DRELSPE 3     | 1.39   | 0.002    | -0.004    | 1 | 35.23 | 21 | 120 | 14 | 1630 | -1.6  |
| 3148.4 | 24 | Q14160 | R.LALDGETLGEQEEL LALDGETLGEQEEDQPPWASP 3         | 1.472  | 2.30E-04 | -0.007    | 0 | 44.43 | 21 | 162 | 14 | 1630 | -2.1  |
| 2267.9 | 9  | Q14160 | R.SEACPCQDPSGSL SEAC[160.0307]PC[160.0307]C 2    | -0.832 | 0.038    | -0.006    | 0 | 21.01 | 19 | 162 | 14 | 1630 | -2.47 |
| 3148.4 | 30 | Q14160 | R.LALDGETLGEQEEL LALDGETLGEQEEDQPPWASP 3         | 1.55   | 0.001    | -0.007    | 0 | 36.85 | 21 | 147 | 13 | 1630 | -2.1  |
| 2964.2 | 19 | Q14160 | K.MAESPCSPGQQP MAESPC[160.0307]SPS[166.99 3      | 1.376  | 0.002    | -0.005    | 0 | 33.19 | 19 | 92  | 11 | 1630 | -1.65 |
| 4174.9 | 25 | Q14160 | R.LAEAPSPAPTPSPF LAEAPSPAPTPSPFVLDLGPQT 5 4      | -0.092 | 0.017    | -0.008    | 1 | 22.2  | 17 | 67  | 9  | 1630 | -1.88 |
| 2267.9 | 9  | Q14160 | R.SEACPCQDPSGSL SEAC[160.0307]PC[160.0307]C 2    | -0.691 | 0.028    | -0.006    | 0 | 22.4  | 19 | 167 | 18 | 1630 | -2.47 |
| 1555.8 | 7  | Q14160 | R.LRVQSPPEPPAPER.# LRVQSP[166.9984]PEPPAPER 3    | 0.429  | 0.018    | -0.004    | 1 | 25.65 | 21 | 167 | 18 | 1630 | -2.38 |
| 2609.2 | 17 | Q14160 | R.MVEPENAVITPLR MVEPENAVITPLREPDDYS[166. 3       | 0.269  | 0.028    | -0.009    | 1 | 24.04 | 21 | 162 | 14 | 1630 | -3.56 |
| 2085.9 | 12 | Q14165 | K.KEEEEEEVEYEGSN KEEEEEEVEYEGSNLK 3              | 2.572  | 4.90E-06 | -0.004    | 1 | 60.69 | 20 | 61  | 2  | 292  | -1.77 |
| 4217.9 | 17 | Q14202 | R.RGSPQEEELPQGC RSPQEEELPQGPQPS[166.99 4         | -0.067 | 0.04     | -0.008    | 1 | 19.12 | 18 | 19  | 8  | 1370 | -1.8  |
| 1814.8 | 9  | Q14247 | K.TQTPPVSPAPQPT TQT[181.014]PPVSPAPQPT 2         | 1.978  | 4.20E-05 | -0.004    | 0 | 51.28 | 20 | 87  | 6  | 550  | -2.39 |
| 1590.7 | 10 | Q14247 | R.LPSSPVYDAASF.K LPSS[166.9984]PVYDAASF 2        | 1.975  | 6.00E-05 | -0.002    | 0 | 51.11 | 21 | 87  | 6  | 550  | -1.51 |
| 1894.8 | 8  | Q14247 | K.TQTPPVSPAPQPT T[181.014]QTPPVSP[166.9984] 2    | -0.809 | 0.032    | -0.005    | 0 | 22.27 | 20 | 87  | 6  | 550  | -2.4  |
| 1894.8 | 10 | Q14247 | K.TQTPPVSPAPQPT TQT[181.014]PPVSP[166.9984] 2    | 1.157  | 3.60E-04 | -0.005    | 0 | 41.83 | 20 | 123 | 4  | 550  | -2.4  |
| 3386.5 | 16 | Q14247 | K.TQTPPVSPAPQPT TQT[181.014]PPVSP[166.9984] 3    | 0.081  | 0.048    | -0.006    | 1 | 21.14 | 20 | 123 | 4  | 550  | -1.86 |
| 3466.5 | 20 | Q14247 | K.TQTPPVSPAPQPT TQT[181.014]PPVSP[166.9984] 3    | 1.008  | 0.005    | -0.002    | 1 | 30.51 | 20 | 111 | 5  | 550  | -0.5  |
| 3386.5 | 18 | Q14247 | K.TQTPPVSPAPQPT TQT[181.014]PPVSPAPQPT 2         | 1.655  | 4.50E-04 | -0.007    | 1 | 41.22 | 20 | 100 | 5  | 550  | -2.1  |
| 1905.6 | 6  | Q14258 | R.ASAPSPNAQVACDI ASAP[166.9984]PNAQVAC[16 2      | 0.953  | 6.30E-04 | -0.004    | 0 | 38.75 | 19 | 39  | 2  | 630  | -2.06 |
| 2542   | 9  | Q14432 | R.VNPVTSLSENVYTC VNPVTSLSENVYTC[160.0307]S[1 2   | -0.709 | 0.029    | -0.003    | 0 | 22.27 | 19 | 21  | 4  | 1141 | -1.41 |
| 1909.8 | 14 | Q14498 | R.TDASSASSFLDSELD TDASS[166.9984]ASSFLDSELD 2    | 1.654  | 1.10E-04 | -0.003    | 0 | 46.76 | 20 | 48  | 2  | 530  | -1.4  |
| 1134.6 | 6  | Q14498 | R.YRSPYSGPK.F YRS[166.9984]PYSGPK 2              | -0.969 | 0.048    | -0.002    | 1 | 21.53 | 21 | 48  | 2  | 530  | -1.7  |
| 1362.6 | 9  | Q14669 | R.SESPAPLPSLR.R SES[166.9984]PPAPLPSLR 2         | 1.192  | 3.30E-04 | -0.002    | 0 | 42.28 | 20 | 42  | 4  | 2092 | -1.8  |
| 2530.1 | 17 | Q14676 | R.GPGAPGLAHQLESQ GPGAPGLAHQLESQAS[166.99 3       | 1.41   | 0.001    | -0.006    | 0 | 37.55 | 21 | 59  | 6  | 2089 | -2.3  |
| 2942.2 | 13 | Q14676 | R.ESEDETOPDFDTHL ESEDETOPDFDTHLEAVGPC[160. 3     | 1.41   | 3.80E-04 | -0.007    | 0 | 42.15 | 20 | 59  | 6  | 2089 | -2.55 |
| 2839.1 | 8  | Q14676 | R.SQTTTTERSDTDVE SQTT[181.014]TERDS[166.998 3    | 0.939  | 0.007    | -0.007    | 1 | 27.72 | 18 | 51  | 6  | 2089 | -2.55 |
| 2839.1 | 16 | Q14676 | R.SQTTTTERSDTDVE SQTT[181.014]TERDS[166.998 3    | 0.075  | 0.048    | -0.007    | 1 | 19.1  | 18 | 96  | 10 | 2089 | -2.54 |
| 1834.8 | 8  | Q14677 | K.ASPDQNASTHTPQ ASPDQNASTHTPQSS[166.9984] 2      | -0.991 | 0.048    | -0.002    | 0 | 21.31 | 21 | 21  | 2  | 625  | -1.2  |
| 1914.8 | 9  | Q14677 | K.ASPDQNASTHTPQ ASPDQNASTHT[181.014]PQSS[ 2      | 0.388  | 0.002    | -0.002    | 0 | 34.19 | 20 | 34  | 4  | 625  | -1.01 |
| 1834.8 | 10 | Q14677 | K.ASPDQNASTHTPQ ASPDQNASTHTPQSS[166.9984] 2      | -0.395 | 0.012    | -0.002    | 0 | 27.34 | 21 | 33  | 3  | 625  | -1.2  |
| 1834.8 | 11 | Q14677 | K.ASPDQNASTHTPQ ASPDQNASTHT[181.014]PQSSv 2      | -0.871 | 0.036    | -0.002    | 0 | 22.58 | 21 | 33  | 3  | 625  | -1.2  |
| 1834.8 | 8  | Q14677 | K.ASPDQNASTHTPQ AS[166.9984]PQDQNASTHTPQSS 2     | -0.849 | 0.033    | -0.003    | 0 | 22.87 | 21 | 23  | 1  | 625  | -1.53 |
| 3063.2 | 20 | Q14684 | R.VAEPGAEATSTGEE VAEPGAEATSS[166.9984]ST[181 3   | 0.103  | 0.041    | -0.008    | 0 | 21.43 | 20 | 116 | 9  | 758  | -2.56 |
| 1865.8 | 12 | Q14684 | R.VFVVEEDESSESLQ VFC[160.0307]VEEDES[166.99 2    | 2.35   | 2.02E-05 | -0.006    | 0 | 54.86 | 21 | 116 | 9  | 758  | -3.19 |
| 1108.6 | 5  | Q14684 | R.GSPTGGAQLL.R GS[166.9984]PTGGAQLL 2            | -0.97  | 0.048    | -0.002    | 0 | 20.56 | 20 | 170 | 14 | 758  | -2.17 |
| 2108.9 | 10 | Q14684 | K.VGDGDLAEIPEIN VGDGDL[166.9984]AEIPEIN 2        | 2.105  | 3.80E-05 | -0.005    | 0 | 52.38 | 21 | 147 | 9  | 758  | -2.29 |
| 3063.2 | 16 | Q14684 | R.VAEPGAEATSTGEE VAEPGAEATSS[166.9984]STGEE 3    | 1.472  | 4.90E-05 | -0.008    | 0 | 50.66 | 20 | 147 | 9  | 758  | -2.56 |
| 3063.2 | 13 | Q14684 | R.VAEPGAEATSTGEE VAEPGAEATSS[166.9984]TGEE 3     | 1.544  | 2.10E-04 | -0.008    | 0 | 44.36 | 20 | 170 | 14 | 758  | -2.56 |
| 1422.7 | 9  | Q14684 | K.TPTSSPASSPLVAK.I TPTS[166.9984]PASSPLVAK 2     | -0.749 | 0.027    | -0.003    | 0 | 23.8  | 21 | 161 | 14 | 758  | -2.24 |
| 2265   | 14 | Q14684 | K.VGDGDLAEIPEIN VGDGDL[166.9984]AEIPEIN 3        | 1.655  | 1.90E-04 | -0.004    | 1 | 45.21 | 21 | 161 | 14 | 758  | -2    |
| 2983.3 | 15 | Q14684 | R.VAEPGAEATSTGEE VAEPGAEATSSGEESS[166.9984] 4    | -0.002 | 0.037    | -0.004    | 0 | 22.67 | 21 | 116 | 9  | 758  | -1.21 |
| 1422.7 | 10 | Q14684 | K.TPTSSPASSPLVAK.I TPTS[166.9984]SPASSPLVAK 2    | -0.047 | 0.005    | -0.003    | 0 | 30.79 | 21 | 170 | 14 | 758  | -2.24 |
| 3143.2 | 9  | Q14684 | R.VAEPGAEATSTGEE VAEPGAEATSS[166.9984]T[181 3    | 0.719  | 0.009    | -0.006    | 0 | 26.54 | 19 | 161 | 14 | 758  | -1.86 |
| 3555.3 | 21 | Q14687 | K.GPPTQELDRSEEE GPPTQELDRS[166.9984]EEEE 3       | 1.668  | 1.60E-04 | -0.009    | 1 | 43.5  | 18 | 44  | 7  | 1217 | -2.55 |
| 1355.4 | 4  | Q14692 | K.AGLSPANCQSDR.V AGLS[166.9984]PANC[160.030 2    | -0.154 | 0.008    | -0.003    | 0 | 27.82 | 19 | 28  | 3  | 1282 | -2.24 |
| 3201.4 | 18 | Q14694 | R.TCNSPQNSTSDVSC TC[181.014]C[160.0307]NSPQN 3   | 0.716  | 0.01     | -0.005    | 0 | 27.56 | 20 | 78  | 2  | 798  | -1.51 |
| 3107.2 | 22 | Q14694 | K.NHNSVNEEQEQGI NHNSVNEEQEQGEGS[166.998 3        | 1.472  | 6.70E-06 | -0.007    | 0 | 57.52 | 18 | 73  | 4  | 798  | -2.21 |
| 3201.4 | 20 | Q14694 | R.TCNSPQNSTSDVSC TC[160.0307]NS[166.9984]PQ 3    | 1.828  | 7.70E-04 | -0.005    | 0 | 38.63 | 20 | 74  | 3  | 798  | -1.51 |
| 2405   | 23 | Q14699 | R.GDHASLENEKPGTC GDHAS[166.9984]LENEKPGTGC 3     | 0.491  | 0.017    | -0.003    | 1 | 26.31 | 21 | 26  | 1  | 578  | -1.3  |
| 2672.2 | 28 | Q14789 | R.QASPETASPDGSC QAS[166.9984]PETASPDGSC 3        | 1.41   | 4.60E-04 | -0.005    | 0 | 41.66 | 21 | 42  | 5  | 3259 | -1.9  |
| 2672.2 | 8  | Q14789 | R.QASPETASPDGSC QASPETASPDGSS[166.9984]QN 3      | 1.472  | 4.50E-04 | -0.005    | 0 | 41.99 | 21 | 42  | 3  | 3259 | -1.9  |
| 3132.1 | 15 | Q147X3 | R.CFPFAGAALACSE C[160.0307]FPFAGAALAC[160. 3     | 1.41   | 1.90E-04 | -0.01     | 0 | 42.88 | 18 | 42  | 3  | 362  | -3.35 |
| 2958.4 | 20 | Q14807 | R.GPEEEIGSPPEMA GPEEEIGSPPEMAPASASQKLS 3         | 0.477  | 0.017    | -0.01     | 1 | 25.11 | 20 | 25  | 1  | 665  | -3.33 |
| 2815.1 | 14 | Q14814 | K.GFNGDCPEPDGEE GFNGDC[160.0307]D[166.9984] 3    | 1.105  | 0.004    | -0.007    | 0 | 31.45 | 20 | 31  | 1  | 521  | -2.59 |
| 2383   | 14 | Q14839 | K.STAPETAIQCTAPF STAPETAI[160.0307]TQAPAP 2      | 1.436  | 1.70E-04 | -0.006    | 0 | 46.72 | 22 | 48  | 4  | 1912 | -2.67 |
| 1095.5 | 7  | Q14839 | K.MSQQSPSPK.T MSQQSP[166.9984]PSPK 2             | 0.495  | 0.002    | -2.00E-04 | 0 | 34.26 | 19 | 97  | 9  | 1912 | -0.2  |
| 1095.5 | 6  | Q14839 | K.MSQQSPSPK.T MSQQSPS[166.9984]PK 2              | 0.436  | 0.002    | -2.00E-04 | 0 | 33.75 | 19 | 80  | 6  | 1912 | -0.2  |
| 1498.7 | 9  | Q14966 | K.QSSVTQVTEQSPK.I QSSVTQVTEQS[166.9984]PK 2      | -0.285 | 0.01     | -0.003    | 0 | 28.51 | 21 | 29  | 3  | 1978 | -1.87 |
| 1117.5 | 11 | Q14978 | R.DNQLSEVANK.F DNQLSEVANK 2                      | -0.405 | 0.012    | -0.002    | 0 | 26.31 | 20 | 93  | 5  | 699  | -1.85 |
| 2574.9 | 17 | Q14978 | K.QQPVESEDSDES QQPVESEDSDES[166.998 3            | 1.41   | 4.40E-04 | -0.004    | 0 | 37.52 | 16 | 93  | 5  | 699  | -1.7  |
| 2661.9 | 11 | Q14978 | K.KASSSDSESEEEEE KASSS[166.9984]DS[166.9984] 3   |        |          |           |   |       |    |     |    |      |       |

|        |    |             |                                               |       |          |           |        |       |       |     |     |      |       |       |
|--------|----|-------------|-----------------------------------------------|-------|----------|-----------|--------|-------|-------|-----|-----|------|-------|-------|
| 1914.8 | 8  | Q15149      | R.SSSVGSSSSYPISA' SSSVGSSS[166.9984]Y[243.02  | 0.307 | 0.027    | -0.003    | 0      | 23.47 | 20    | 341 | 25  | 4684 | -1.66 |       |
| 1198.6 | 7  | Q15149      | K.QITMELVR.S QIT[181.014]MELVR                | 2     | 2.396    | 1.90E-05  | -0.002 | 0     | 55.32 | 21  | 341 | 25   | 4684  | -1.44 |
| 1914.8 | 11 | Q15149      | R.SSSVGSSSSYPISA' SSS[166.9984]VGS[166.9984]S | 2     | 1.88     | 7.30E-05  | -0.004 | 0     | 49.13 | 20  | 286 | 22   | 4684  | -2.23 |
| 1862.8 | 13 | Q15149      | K.GYSPYSVSGSGST' GYSPYSVSGSGS[166.9984]TAC    | 2     | 1.985    | 1.30E-06  | -0.004 | 0     | 66.05 | 20  | 286 | 22   | 4684  | -2.13 |
| 1942.7 | 19 | Q15149      | K.GYSPYSVSGSGST' GYSPYSVSGSGS[181.014]AG'     | 2     | -0.326   | 0.011     | -0.004 | 0     | 25.07 | 18  | 286 | 22   | 4684  | -2.1  |
| 1914.8 | 12 | Q15149      | R.SSSVGSSSSYPISA' SSS[166.9984]VGSSSY[243.02  | 3     | 0.692    | 0.011     | -0.003 | 0     | 27.27 | 20  | 286 | 22   | 4684  | -1.66 |
| 1942.7 | 13 | Q15149      | K.GYSPYSVSGSGST' GYSPYSVSGSGS[166.9984]GS[16  | 2     | -0.64    | 0.023     | -0.004 | 0     | 21.86 | 18  | 319 | 24   | 4684  | -2.1  |
| 1350.6 | 13 | Q15149      | R.DSQDAGGFDPEDR DSQDAGGFDPEDR                 | 2     | 0.574    | 0.001     | -0.003 | 0     | 36.03 | 20  | 458 | 28   | 4684  | -2.5  |
| 2097   | 15 | Q15149      | R.DALDGAPEAEPEH' DALDGAPEAEPEHSDGLR           | 3     | 0.11     | 0.041     | -0.004 | 0     | 21.45 | 20  | 458 | 28   | 4684  | -1.69 |
| 1862.8 | 14 | Q15149      | K.GYSPYSVSGSGST' GYSPYS[166.9984]VSGSGTAC     | 2     | 2.14     | 4.80E-06  | -0.004 | 0     | 60.25 | 20  | 458 | 28   | 4684  | -2.13 |
| 1862.8 | 15 | Q15149      | K.GYSPYSVSGSGST' GYSPYSVSGSGS[181.014]AG'     | 3     | 0.59     | 0.012     | -0.003 | 0     | 26.25 | 20  | 458 | 28   | 4684  | -1.7  |
| 1708.8 | 10 | Q15149      | R.LLDPEDVDVPPQD' LLDPEDVDVPPQDEK              | 2     | 0.332    | 0.003     | -0.004 | 0     | 34.61 | 21  | 458 | 28   | 4684  | -2.1  |
| 1862.8 | 10 | Q15149      | K.GYSPYSVSGSGST' GYSPYSVSGSGS[166.9984]GSTAC  | 2     | 1.045    | 4.20E-04  | -0.004 | 0     | 40.84 | 20  | 351 | 26   | 4684  | -2.13 |
| 1914.8 | 9  | Q15149      | R.SSSVGSSSSYPISA' SSSVGSSS[166.9984]SV[243.02 | 3     | 0.815    | 0.009     | -0.003 | 0     | 28.49 | 20  | 443 | 25   | 4684  | -1.66 |
| 2062   | 6  | Q15149      | K.ELEEVSPETPVVPA' ELEEVSPET[181.014]PVVPATTQ  | 2     | 0.413    | 0.002     | -0.005 | 0     | 35.44 | 21  | 288 | 28   | 4684  | -2.23 |
| 1570.8 | 8  | Q15149      | R.DDGTQQLLLPSDA DDGTQQLLLPSDAR                | 2     | -0.283   | 0.011     | -0.002 | 0     | 26.43 | 19  | 319 | 24   | 4684  | -1.23 |
| 2423.9 | 12 | Q15149      | K.GYSPYSVSGSGST' GYSPYSVSGSGS[181.014]AG'     | 3     | -0.439   | 0.014     | -0.006 | 1     | 23.87 | 18  | 319 | 24   | 4684  | -2.31 |
| 1467.7 | 5  | Q15149      | R.ARSDEQLSPATR.' ARSDEQLS[166.9984]PATR       | 2     | -0.361   | 0.011     | -0.005 | 1     | 27.68 | 21  | 458 | 28   | 4684  | -3.71 |
| 1994.8 | 11 | Q15149      | R.SSSVGSSSSYPISA' SSS[166.9984]VGS[166.9984]S | 2     | -0.739   | 0.03      | -0.004 | 0     | 20.9  | 18  | 458 | 28   | 4684  | -2.06 |
| 1129.6 | 7  | Q15149      | K.NLLEDELQR.L NLLEDELQR                       | 2     | -0.486   | 0.017     | -0.002 | 0     | 24.36 | 19  | 443 | 25   | 4684  | -1.55 |
| 1914.8 | 9  | Q15149      | R.SSSVGSSSSYPISA' S[166.9984]SSVGSSSYVPSAV'   | 2     | 0.171    | 0.004     | -0.005 | 0     | 31.93 | 20  | 443 | 25   | 4684  | -2.44 |
| 3096.2 | 10 | Q15154      | K.NVRSIDQDEEED NVRS[166.9984]D[166.9984]      | 3     | 0.867    | 0.008     | -0.009 | 1     | 28.03 | 19  | 74  | 14   | 2024  | -2.94 |
| 1849.8 | 12 | Q15154      | R.YMSQMSVPEQAE' YMSQMS[166.9984]VPEQAEI       | 2     | 1.618    | 1.40E-04  | -0.004 | 0     | 45.51 | 19  | 46  | 12   | 2024  | -2.18 |
| 2647.1 | 9  | Q15154      | R.SDSDQDEEEDSE' SD[166.9984]DQDEEEDSE[2       | 2     | 2.9      | 3.60E-07  | -0.006 | 0     | 71.88 | 20  | 210 | 14   | 2024  | -2.18 |
| 1750.9 | 9  | Q15154      | K.RVTNDIPESSPGV' RVTNDI[166.9984]PESSPGVGI    | 3     | 0.393    | 0.023     | -0.004 | 1     | 25.28 | 21  | 125 | 13   | 2024  | -1.93 |
| 1658.6 | 8  | Q15154      | R.SDGSENLCTQQS' SDGS[166.9984]ENLCT[160.030'  | 2     | -0.873   | 0.038     | -0.003 | 0     | 19.66 | 18  | 93  | 12   | 2024  | -2.05 |
| 1998.9 | 18 | Q15154      | K.DASTSPNRETIGS' DASTS[166.9984]PNRETIGSAC    | 2     | -0.164   | 0.007     | -0.005 | 1     | 29.75 | 21  | 93  | 12   | 2024  | -2.57 |
| 1750.8 | 8  | Q15154      | K.RVTNDIPESSPGV' RVT[181.014]NDIPESSPGVGR     | 3     | 0.419    | 0.022     | -0.004 | 1     | 25.59 | 21  | 42  | 8    | 2024  | -1.98 |
| 1830.8 | 8  | Q15154      | K.RVTNDIPESSPGV' RVTNDI[166.9984]PES[166.99   | 3     | 0.145    | 0.04      | -0.005 | 1     | 22.78 | 21  | 210 | 14   | 2024  | -2.67 |
| 1318.6 | 9  | Q15154      | K.PFESSSIGAEP' PFESSS[166.9984]GAEP           | 2     | 0.472    | 0.002     | -0.003 | 0     | 36.01 | 21  | 125 | 13   | 2024  | -1.22 |
| 1448.6 | 9  | Q15154      | R.WVSELSVVEEK' WVSELS[166.9984]VVEEK          | 2     | -0.325   | 0.012     | -0.002 | 0     | 26.97 | 20  | 176 | 16   | 2024  | -2.29 |
| 1594.7 | 8  | Q15154      | R.VTNDIPESSPGV' VTNDI[166.9984]PESSPGVGR      | 2     | 1.904    | 6.10E-05  | -0.004 | 0     | 50.26 | 21  | 176 | 16   | 2024  | -2.36 |
| 1919.8 | 13 | Q15154      | R.ILEDHGSAGEIDD' ILEDHGS[166.9984]PAGEIDDEE   | 2     | 1.428    | 1.90E-04  | -0.007 | 0     | 44.64 | 20  | 146 | 13   | 2024  | -3.65 |
| 1955.6 | 9  | Q15185      | K.DWEDSDSDMSN' DWEDDS[166.9984]DEDMSNF[2      | 1.601 | 1.20E-04 | -5.00E-04 | 0      | 39.37 | 13    | 171 | 4   | 160  | -0.26 |       |
| 3701.3 | 24 | Q15185      | R.FSEMNMNMGDDE' FSEMNMNMGDDEVDLPEVDG          | 3     | 1.668    | 4.40E-05  | -0.004 | 0     | 47.68 | 17  | 141 | 3    | 160   | -1.21 |
| 3701.3 | 15 | Q15185      | R.FSEMNMNMGDDE' FSEMNMNMGDDEVDLPEVDG          | 3     | 1.655    | 1.70E-04  | -0.004 | 0     | 41.73 | 17  | 154 | 3    | 160   | -1.21 |
| 839.39 | 5  | Q15287      | R.RFSPRR.R RFS[166.9984]PPR                   | 2     | -0.338   | 0.012     | -0.001 | 1     | 26.95 | 20  | 27  | 1    | 160   | -1.73 |
| 2841.1 | 16 | Q15291      | K.ELDENVEYERESE' ELDENVEYERE[166.9984]EFD     | 3     | 0.303    | 0.028     | -0.009 | 1     | 22.36 | 19  | 22  | 1    | 538   | -3.29 |
| 1255.7 | 7  | Q15311      | R.TPSSSEIPTK.F TPS[166.9984]SEIPTK            | 2     | -0.692   | 0.026     | -0.003 | 0     | 23.44 | 20  | 23  | 2    | 655   | -2.1  |
| 1139.6 | 9  | Q15311      | K.IAQEIASLSK.E IAQEIASLS[166.9984]K           | 2     | -0.826   | 0.034     | -0.002 | 0     | 22.05 | 20  | 22  | 4    | 655   | -2.23 |
| 1255.4 | 4  | Q15311      | R.TPSSSEIPTK.F TPS[166.9984]SEIPTK            | 2     | -0.659   | 0.024     | -0.003 | 0     | 23.63 | 20  | 32  | 4    | 655   | -2.1  |
| 2990.4 | 25 | Q15326      | K.KEEPEPETEVAESS' KEEPEPETEVAESS[166.9984]QE  | 3     | 0.638    | 0.013     | -0.009 | 1     | 26.71 | 20  | 27  | 1    | 602   | -2.99 |
| 2046.8 | 10 | Q15361      | R.DIFYEDDEGEDIE' DIFYEDDS[166.9984]EGEDIEK    | 2     | 0.25     | 0.003     | -0.005 | 0     | 29.81 | 17  | 30  | 6    | 905   | -2.71 |
| 2555.1 | 28 | Q15365      | R.VMTIPYQMPASSI' VMTIPYQMPASS[166.9984]PA     | 3     | 1.544    | 4.30E-05  | -0.004 | 0     | 52.22 | 21  | 52  | 2    | 356   | -1.38 |
| 1497.7 | 8  | Q15366      | K.PSSSPVIFAGGQDR' PSS[166.9984]PVIFAGGQDR     | 2     | -0.363   | 0.013     | -0.003 | 0     | 26.73 | 20  | 27  | 1    | 366   | -1.77 |
| 1455.6 | 7  | Q15388      | R.IVSAQSLAEDDVE' IVSAQSLAEDDVE                | 2     | 0.87     | 7.30E-04  | -0.003 | 0     | 39.06 | 20  | 39  | 1    | 145   | -1.89 |
| 1375.7 | 15 | Q15388      | R.IVSAQSLAEDDVE' IVSAQSLAEDDVE                | 2     | 0.434    | 0.002     | -0.003 | 0     | 35.6  | 21  | 49  | 2    | 145   | -2.34 |
| 1455.6 | 15 | Q15388      | R.IVSAQSLAEDDVE' IVS[166.9984]QAQSLAEDDVE     | 2     | -0.408   | 0.014     | -0.002 | 0     | 26.14 | 20  | 80  | 3    | 145   | -1.54 |
| 1804.9 | 8  | Q15390      | R.QISLPLDLSQEEP' QIS[166.9984]PLDLSQEEPQLK    | 2     | -0.003   | 0.005     | -0.003 | 0     | 31.33 | 21  | 31  | 1    | 333   | -1.44 |
| 1435.6 | 6  | Q15390      | R.YRSDSQDEVEK' YRSDS[166.9984]QDEVEK          | 2     | 0.058    | 0.004     | -0.003 | 1     | 30.87 | 20  | 52  | 2    | 333   | -2.35 |
| 1017.5 | 6  | Q15424      | K.RSVVFDK.V RSVV[166.9984]FDK                 | 2     | -0.365   | 0.012     | -0.003 | 1     | 27.61 | 21  | 70  | 6    | 915   | -2.74 |
| 2490.9 | 20 | Q15424      | K.ESTSEGADQKMS' ESTSEGADQKMS[166.9984]S[      | 3     | 0.78     | 0.009     | -0.004 | 1     | 26.13 | 18  | 70  | 6    | 915   | -1.64 |
| 2410.9 | 18 | Q15424      | K.ESTSEGADQKMS' ESTSEGADQKMS[166.9984]SP      | 3     | 0.553    | 0.013     | -0.005 | 1     | 25.87 | 20  | 88  | 10   | 915   | -2.1  |
| 4391.9 | 38 | Q15424,Q141 | R.TDCEVGLPEAVEQ' TDC[160.0307]EPVGLPEAVEQS    | 4     | 0.038    | 1.60E-05  | -0.006 | 0     | 5.8   | 18  | 101 | 1    | 142   | -1.82 |
| 2516.1 | 11 | Q15424,Q141 | K.EESSELEQPFADQ' EESSELEQPFADQ[181.014]SSV    | 3     | 0.21     | 0.031     | -0.005 | 1     | 23.5  | 21  | 101 | 1    | 101   | -1.44 |
| 4471.9 | 21 | Q15424,Q141 | R.TDCEVGLPEAVEQ' TDC[160.0307]EPVGLPEAVEQS    | 4     | 0.038    | 0.004     | -0.006 | 0     | 29.51 | 18  | 101 | 1    | 101   | -1.38 |
| 2516.1 | 11 | Q15424,Q141 | K.EESSELEQPFADQ' EESSELEQPFADQ[166.9984]S     | 3     | 0.342    | 0.024     | -0.005 | 1     | 24.77 | 21  | 117 | 1    | 101   | -1.84 |
| 2388   | 11 | Q15424,Q141 | K.EESSELEQPFADQ' EESSELEQPFADQ[166.9984]T     | 3     | 0.081    | 0.004     | -0.002 | 0     | 32.14 | 21  | 47  | 0    | 101   | -0.99 |
| 1668.7 | 19 | Q15434      | K.GYGFVDFDPSAAC' GYGFVDFD[166.9984]PSAACQ     | 2     | 1.978    | 1.80E-05  | -0.003 | 0     | 55.22 | 20  | 55  | 1    | 407   | -1.95 |
| 3329.3 | 37 | Q15459      | K.AEPPSQDQDQTT' AEPPSQDQDQTTQVQMDDEGS[        | 3     | 1.41     | 5.10E-07  | -0.007 | 0     | 68.75 | 18  | 70  | 6    | 793   | -2.04 |
| 2697   | 11 | Q15459      | K.FGESEEVEMVESD' FGESEEVEMVES[166.9984]DEI    | 3     | 0.097    | 0.043     | -0.006 | 1     | 19.37 | 18  | 70  | 6    | 793   | -2.35 |
| 5781.6 | 26 | Q15459      | K.AEPPSQDQDQTT' AEPPSQDQDQTTQVQMDDEGS[        | 5     | -0.33    | 0.047     | -0.013 | 1     | 17.58 | 17  | 61  | 2    | 793   | -2.15 |
| 1154.6 | 7  | Q15477      | R.ASSLEDLV.LK' ASS[166.9984]LEDLVK            | 2     | 1.493    | 1.70E-04  | -0.002 | 0     | 46.29 | 21  | 46  | 1    | 1246  | -1.75 |
| 1713.9 | 11 | Q15554      | K.DLVLTQALPASPA' DVLVLTQALPAS[166.9984]PAL    | 2     | 2.085    | 2.00E-06  | -0.002 | 0     | 61.05 | 17  | 61  | 1    | 500   | -1.85 |
| 2926.3 | 16 | Q15637      | R.TGDLGIPPNPEDRS' TGDGIPPNPEDRS[166.9984]P[   | 3     | 0.679    | 0.01      | -0.005 | 1     | 28.19 | 21  | 63  | 2    | 639   | -1.22 |
| 2926.3 | 15 | Q15637      | R.TGDLGIPPNPEDRS' TGDGIPPNPEDRS[166.9984]P[   | 3     | 2.092    | 4.00E-04  | -0.005 | 1     | 42.35 | 21  | 42  | 3    | 639   | -1.82 |
| 2926.3 | 13 | Q15637      | R.TGDLGIPPNPEDRS' TGDGIPPNPEDRS[166.9984]P[   | 3     | 1.264    | 0.003     | -0.007 | 1     | 33.97 | 21  | 45  | 4    | 639   | -2.23 |
| 1921.9 | 5  | Q15642      | R.APSDSSGLTSPDGR' APSDS[166.9984]SLGTPSDGRPI  | 2     | -0.832   | 0.033     | -0.004 | 1     | 22.97 | 21  | 23  | 1    | 601   | -2.3  |
| 1611.7 | 13 | Q15648      | K.NSSQSGGKPGSSPI' NSSQSGGKPGS[166.9984]PIT    | 2     | -0.589   | 0.02      | -0.002 | 1     | 24.47 | 20  | 24  | 7    | 1581  | -0.93 |
| 1611.7 | 7  | Q15648      | K.NSSQSGGKPGSSPI' NSSQSGGKPGS[166.9984]SPIT   | 2     | -0.14    | 0.007     | -0.002 | 1     | 28.96 | 20  | 29  | 11   | 1581  | -0.93 |
| 1715.7 | 7  | Q15651      | K.AEEAQKTESVNEG' AEEAQKTES[166.9984]VDNEGE    | 2     | 1.982    | 1.30E-05  | -0.001 | 1     | 54.86 | 19  | 55  | 1    | 99    | -0.59 |
| 1455.6 | 10 | Q15746      | K.SSTGSPSPLNAEK' SSTGSPS[166.9984]PLNAEK      | 2     | 1.213    | 3.50E-04  | -0.004 | 0     | 42.49 | 20  | 64  | 2    | 1914  | -2.73 |
| 1663.7 | 11 | Q15746      | K.KSSTGSPSPLNAEK' KSS[166.9984]TGSPTS[166.998 | 2     | 1.003    | 5.70E-04  | -0.002 | 1     | 40.39 | 20  | 64  | 2    | 1914  | -0.87 |
| 1583.7 | 11 | Q15746      | K.KSSTGSPSPLNAEK' KSS[166.9984]TGSPTSPLNAEK   | 2     | 0.15     | 0.004     | -0.003 | 1     | 33.76 | 22  | 34  | 1    | 1914  | -1.21 |
| 1448.7 | 5  | Q15746      | R.APGLVLSVSGEER' APGLVLSV[166.9984]SGEER      | 2     | -0.26    | 0.01      | -0.001 | 0     | 28.73 | 21  | 63  | 4    | 1914  | -0.89 |
| 1448.7 | 9  | Q15746      | R.APGLVLSVSGEER' APGLVLSV[166.9984]SGEER      | 2     | 0.238    | 0.003     | -0.001 | 0     | 33.69 | 21  | 62  | 3    | 1914  | -0.89 |
| 1663.7 | 10 | Q15746      | K.KSSTGSPSPLNAEK' KSS[166.9984]TGSPT[181.014] | 2     | 1.906    | 7.20E-05  | -0.002 | 1     | 49.39 | 20  | 63  | 4    | 1914  | -0.87 |
| 1349.6 | 10 | Q15773      | R.LAIQPEDSPSR.Q' LAIQPEDS[166.9984]PSR        | 2     | 1.355    | 2.30E-04  | -0.003 | 0     | 43.91 | 20  | 44  | 1    | 248   | -2.27 |
| 1944.9 | 11 | Q15910      | K.ESSIIAPAEVDVDT' ESSIIAPAEVDVDT[181.014]PP   | 2     | -0.239   | 0.01      | -0.005 | 0     | 28.92 | 21  | 29  | 4    | 746   | -2.47 |
| 1595.7 | 10 | Q15942      | K.FSPGAGGSGSQPF' FSPGAGGSGSQPF[166            |       |          |           |        |       |       |     |     |      |       |       |



|        |    |             |                                                 |        |          |           |   |       |    |     |    |      |       |
|--------|----|-------------|-------------------------------------------------|--------|----------|-----------|---|-------|----|-----|----|------|-------|
| 2828.1 | 14 | Q32M24      | R.CTLPEHESPSQDISC [160.0307]TLPEHESPS[166.99    | 1.41   | 2.30E-05 | -0.008    | 0 | 53.29 | 19 | 53  | 3  | 808  | -2.78 |
| 2828.1 | 12 | Q32M24      | R.CTLPEHESPSQDISC [160.0307]TLPEHESPS[166.9984  | 1.544  | 6.70E-05 | -0.008    | 0 | 48.63 | 19 | 49  | 2  | 808  | -2.78 |
| 1533.6 | 10 | Q3KQU3      | R.PAPPQEESSPSEAK. PAPPQEESS[166.9984]SEAK 2     | -0.814 | 0.036    | -0.003    | 0 | 22.17 | 20 | 22  | 3  | 841  | -2.16 |
| 2313   | 17 | Q3KQU3      | K.EAAPPASPAPSPAP. EAAPPAS[166.9984]PAPSPAPS[ 3  | 0.281  | 0.027    | -0.004    | 0 | 24.16 | 21 | 29  | 5  | 841  | -1.79 |
| 3285.5 | 13 | Q3KQU3      | K.QLPLEPESPSGQVQ QLPLEPES[166.9984]PSGQVGP 3    | 0.168  | 0.032    | -0.004    | 1 | 22.03 | 20 | 29  | 5  | 841  | -1.27 |
| 1533.6 | 13 | Q3KQU3      | R.PAPPQEESSPSEAK. PAPPQEESS[166.9984]PSSEAK 2   | -0.754 | 0.031    | -0.003    | 0 | 22.82 | 20 | 23  | 4  | 841  | -2.16 |
| 1677.8 | 10 | Q3KR37      | K.SSIETKPDASQPLPK SSIETKPDAS[166.9984]PQLPK 2   | -0.526 | 0.016    | -0.004    | 1 | 26.13 | 21 | 26  | 3  | 738  | -2.43 |
| 1672.7 | 10 | Q3L8U1      | R.VMSPFNFTASVEK VMS[166.9984]PNFPTASVEGK 2      | -0.478 | 0.018    | -0.003    | 0 | 25.48 | 20 | 25  | 8  | 2897 | -1.86 |
| 2790.1 | 20 | Q3TR89      | K.VHEHSPGPLADAEV VEH[166.9984]PGPLADAE[ ] 3     | 2.68   | 1.00E-04 | -0.007    | 0 | 47.2  | 20 | 47  | 2  | 2241 | -2.68 |
| 3164.3 | 29 | Q3YEC7      | R.ADDFVRDDPSDV ADDFVRDDPS[166.9984]DVT[ 3       | 1.464  | 0.002    | -0.008    | 1 | 35    | 20 | 35  | 4  | 729  | -2.44 |
| 2488.1 | 10 | Q3YEC7      | K.NDSDLFGLGLEEAG NDSDLFGLGLEEAGPKES[166.9       | 1.323  | 0.002    | -0.004    | 1 | 34.58 | 21 | 36  | 5  | 729  | -1.63 |
| 3117.3 | 22 | Q4ADV7      | K.AIGSGESETPTPT AIGSGESET[181.014]PPS[166.9     | 1.218  | 0.003    | -0.004    | 0 | 31.54 | 19 | 32  | 5  | 1423 | -1.22 |
| 1927.8 | 11 | Q4G0J3      | R.SRPTSEGSDIESTEP SRPT[181.014]SEGSDIESTEPQ 2   | 1.279  | 2.40E-04 | -0.004    | 1 | 44.15 | 21 | 89  | 8  | 582  | -2    |
| 2007.8 | 11 | Q4G0J3      | R.SRPTSEGSDIESTEP SRPT[181.014]S[166.9984]EG 3  | 0.09   | 0.044    | -0.004    | 1 | 20.3  | 19 | 89  | 8  | 582  | -1.88 |
| 2007.8 | 16 | Q4G0J3      | R.SRPTSEGSDIESTEP SRPT[166.9984]EGS[166.9984    | -0.937 | 0.048    | -0.004    | 1 | 19.99 | 19 | 89  | 8  | 582  | -1.93 |
| 1328.5 | 8  | Q4G0J3      | R.SSSEDAESLAPR.S [166.9984]SSEDAESLAPR 2        | -0.07  | 0.007    | -0.002    | 0 | 28.66 | 19 | 89  | 8  | 582  | -1.91 |
| 1927.8 | 13 | Q4G0J3      | R.SRPTSEGSDIESTEP SRPTSEGS[166.9984]DIESTEPQ 2  | 1.798  | 7.40E-05 | -0.004    | 1 | 49.34 | 21 | 89  | 8  | 582  | -2.31 |
| 1927.8 | 7  | Q4G0J3      | R.SRPTSEGSDIESTEP SRPT[166.9984]EGSDIESTEPQ 2   | -0.732 | 0.025    | -0.004    | 1 | 33.99 | 21 | 74  | 11 | 582  | -2    |
| 1484.6 | 9  | Q4G0J3      | K.RSSEDAESLAPR.S RSS[166.9984]EDAESLAPR 2       | 0.371  | 0.002    | -0.003    | 1 | 24.97 | 21 | 100 | 8  | 582  | -1.92 |
| 2007.8 | 11 | Q4G0J3      | R.SRPTSEGSDIESTEP S[166.9984]RPTS[166.9984]EG 3 | 0.093  | 0.044    | -0.004    | 1 | 20.36 | 19 | 76  | 7  | 582  | -1.88 |
| 1328.5 | 7  | Q4G0J3      | R.SSSEDAESLAPR.S SSS[166.9984]EDAESLAPR 2       | -0.858 | 0.041    | -0.002    | 0 | 20.81 | 19 | 76  | 7  | 582  | -1.91 |
| 1981.8 | 11 | Q4G0J3      | R.DIEISTEEKDTGDL DIEI[166.9984][181.014]EEE 3   | 0.126  | 0.042    | -0.003    | 1 | 21.59 | 20 | 100 | 8  | 582  | -1.53 |
| 1352.5 | 6  | Q4G0J3      | R.DIEISTEEK.D DIEI[166.9984][181.014]EEE 2      | -0.586 | 0.019    | -0.003    | 0 | 20.47 | 16 | 71  | 6  | 582  | -2.27 |
| 1253.6 | 12 | Q4KMP7      | R.AAGGAPSPPPVPR. AAGGAPSP[166.9984]PPVPR 2      | -0.657 | 0.026    | -0.001    | 0 | 24.65 | 21 | 25  | 3  | 808  | -1.12 |
| 2288.9 | 9  | Q4LE39      | K.DIEVLESDTYEEDIE DIEVLS[166.9984]EDTDY[243.0   | 1.696  | 1.00E-04 | -0.005    | 0 | 46.27 | 19 | 46  | 5  | 1312 | -2.16 |
| 2531   | 16 | Q4LE39      | K.EKEDNSSEEEEEIEP EKDENS[166.9984]EEEEIEEPF 3   | 0.658  | 0.01     | -0.005    | 1 | 26.92 | 20 | 27  | 6  | 1312 | -2.15 |
| 2531   | 16 | Q4LE39      | K.EKEDNSSEEEEEIEP EKDENS[166.9984]EEEEIEEPF 3   | 0.859  | 0.006    | -0.005    | 1 | 28.94 | 20 | 53  | 7  | 1312 | -2.15 |
| 1846.8 | 12 | Q5L2R7      | R.LNLQDSDSEECTSF LNLQDSDS[166.9984]EEC[160      | -0.685 | 0.025    | -0.004    | 0 | 24.44 | 21 | 24  | 3  | 807  | -2.13 |
| 1066.5 | 5  | Q53EL6      | R.SGLTVPTSPK.G SGLTVPTS[166.9984]PK 2           | -0.439 | 0.015    | -0.002    | 0 | 25.97 | 20 | 26  | 1  | 469  | -2.27 |
| 1066.5 | 7  | Q53EL6      | R.SGLTVPTSPK.G SGLTVPT[181.014]SPK 2            | 0.737  | 0.001    | -0.002    | 0 | 37.63 | 20 | 38  | 3  | 469  | -2.27 |
| 1760.7 | 13 | Q53EL6      | R.DSGRSDSVSDSGS DSGRSDS[166.9984]VSDSGSDV 2     | 0.979  | 5.00E-04 | -0.006    | 1 | 40.12 | 20 | 58  | 2  | 469  | -3.41 |
| 1159.8 | 8  | Q53EL6      | K.RFVSEGDGGR.L RFVS[166.9984]EGDGGGR 2          | 0.016  | 0.005    | -0.003    | 1 | 30.38 | 20 | 55  | 3  | 469  | -2.4  |
| 1185.6 | 5  | Q53EPO      | R.LNSPPSSYK.S LNS[166.9984]PPSSYK 2             | -0.909 | 0.045    | -0.002    | 0 | 24.22 | 23 | 24  | 3  | 1204 | -1.94 |
| 2329.1 | 8  | Q53E24      | K.VAASPSPKPTAALNE VAASPKS[166.9984]PT[181.01    | 0.778  | 0.009    | -0.003    | 1 | 29.13 | 21 | 29  | 2  | 464  | -1.12 |
| 1668.7 | 9  | Q53G59      | R.EVDESEPEREVR.V EVDEES[166.9984]EPEREVR 2      | -0.566 | 0.021    | -0.001    | 1 | 24.6  | 20 | 25  | 1  | 565  | -0.68 |
| 1615.7 | 15 | Q53HL2      | R.IYNSGNGSPPLADS.I YNSGNGS[166.9984]PLADS 2     | 1.978  | 3.20E-05 | -0.003    | 0 | 53.51 | 21 | 54  | 1  | 280  | -1.68 |
| 1954.1 | 15 | Q562R1      | R.VAPDEHPILLTEAPL VAPDEHPILLTEAPLNP 3           | 0.313  | 0.025    | -0.004    | 0 | 18.47 | 15 | 29  | 3  | 376  | -1.88 |
| 2021.9 | 10 | Q56N19      | R.VLSEIPGEPSPSTIE VLSEIPGES[166.9984]PSSTEC[ 2  | 2.774  | 3.80E-06 | -0.002    | 0 | 62.87 | 21 | 63  | 1  | 601  | -0.81 |
| 1040.5 | 5  | Q5BK21      | K.ILSKSPKPT.K ILSKS[166.9984]PTK 2              | -0.016 | 0.006    | -0.002    | 1 | 29.1  | 19 | 29  | 2  | 582  | -2.43 |
| 4013.6 | 8  | Q5F1R6      | K.QLLEEEEEFRSRPQ QLLEEEEEFRSRPQDENPLDMS 3       | 0.407  | 0.022    | -0.002    | 1 | 23.47 | 19 | 23  | 2  | 531  | -0.43 |
| 3247.2 | 11 | Q5F1R6      | K.DDEEDGKSDAEADV DEEDGKSD[166.9984]DEADAE 3     | 0.709  | 0.01     | -0.005    | 1 | 24.49 | 17 | 37  | 3  | 531  | -1.65 |
| 2219.9 | 13 | Q5H9R7      | R.IQQFDDGGSDDEED IQQFDDGG[166.9984]DEEDIV 2     | 1.985  | 1.30E-06 | -0.006    | 0 | 65.83 | 20 | 66  | 4  | 873  | -2.67 |
| 1911.8 | 9  | Q5HY17      | K.LTPAAEENNSFRQLS LTPAAEENNSFRQLS[166.9984]P 2  | 0.309  | 0.002    | -0.004    | 1 | 34.35 | 21 | 34  | 1  | 312  | -2.08 |
| 1709.8 | 7  | Q5HYJ3      | K.ISNLSEEEQGLWK ISNLS[166.9984]PEEEQGLWK 2      | 0.7    | 9.70E-04 | -0.003    | 0 | 38.36 | 21 | 38  | 1  | 339  | -1.56 |
| 2438   | 33 | Q5JRA6      | R.DPPPPASQSTQDCC DPPPPASQSTQDCC[160.0307]S 3    | 2.267  | 3.00E-04 | -0.006    | 1 | 43.07 | 20 | 58  | 3  | 1907 | -2.47 |
| 2966.7 | 17 | Q5JRA6      | R.DTMDLESSSEEEK DTMDLESS[166.9984]EEEEK 3       | 0.692  | 0.009    | -0.009    | 1 | 26.26 | 19 | 26  | 7  | 1907 | -2.95 |
| 1779.7 | 15 | Q5JSH3      | K.EVYNDAAQSDDEIE EVYNDAAQS[166.9984]DDEEK 2     | 1.978  | 1.30E-05 | -0.004    | 0 | 54.04 | 18 | 54  | 1  | 913  | -2.21 |
| 1779.7 | 5  | Q5JSH3      | K.EVYNDAAQSDDEIE EVYS[166.9984]NDAAQSDDEEK 2    | -0.093 | 0.006    | -0.004    | 0 | 27.32 | 18 | 27  | 2  | 913  | -2.21 |
| 1612.7 | 6  | Q5JSD25     | R.CSPLEPDPVPEK.K [160.0307]S[166.9984]PLEPD 2   | -0.821 | 0.037    | -0.002    | 0 | 22.13 | 20 | 22  | 4  | 2229 | -0.97 |
| 1622.7 | 10 | Q5JTD0      | R.GSPEELPLPAFEK.I GS[166.9984]PEELPLPAFEK 2     | -0.566 | 0.019    | -0.003    | 0 | 24.56 | 20 | 25  | 3  | 557  | -1.61 |
| 2632   | 13 | Q5JTH9      | K.GDSIEELADSEDEE GDSIEELADS[166.9984]EDEED 2    | 1.978  | 1.60E-07 | -0.004    | 0 | 74.93 | 19 | 89  | 2  | 1297 | -1.66 |
| 2916.1 | 11 | Q5JTV8      | K.VNFSSEETEDDQ VNF[166.9984]EETED[181.01        | 0.411  | 0.019    | -0.008    | 0 | 22.51 | 20 | 113 | 7  | 583  | -2.74 |
| 2461   | 12 | Q5JTV8      | R.DSHSSEDEASSQT DSHSSEDEAS[166.9984]SQTD 3      | 1.446  | 0.002    | -0.006    | 0 | 34.86 | 18 | 113 | 7  | 583  | -2.43 |
| 2541   | 12 | Q5JTV8      | R.DSHSSEDEASSQT DSHS[166.9984]S[166.9984]EE 2   | 1.253  | 2.70E-04 | -0.004    | 0 | 40.89 | 18 | 113 | 7  | 583  | -1.77 |
| 2461   | 10 | Q5JTV8      | R.DSHSSEDEASSQT DSHS[166.9984]EEDASSQTD 2       | 2.07   | 4.00E-05 | -0.004    | 0 | 51.06 | 20 | 113 | 7  | 583  | -1.54 |
| 2461   | 14 | Q5JTV8      | R.DSHSSEDEASSQT DSHS[166.9984]SEEDASSQTD 3      | 1.7    | 9.70E-04 | -0.006    | 0 | 37.33 | 20 | 160 | 8  | 583  | -2.43 |
| 2541   | 21 | Q5JTV8      | R.DSHSSEDEASSQT DS[166.9984]HS[166.9984]SE 3    | 0.98   | 0.005    | -0.005    | 0 | 28.13 | 18 | 160 | 8  | 583  | -1.97 |
| 2867.2 | 10 | Q5JTV8      | R.GLRDSSHEDEAS.GLRDHS[166.9984]S[166.998        | 0.765  | 0.009    | -0.007    | 1 | 27.98 | 20 | 160 | 8  | 583  | -2.39 |
| 2867.2 | 13 | Q5JTV8      | R.GLRDSSHEDEAS.GLRDHS[166.9984]HS[166.9984      | 1.262  | 0.003    | -0.007    | 1 | 32.97 | 20 | 162 | 9  | 583  | -2.39 |
| 2541   | 27 | Q5JTV8      | R.DSHSSEDEASSQT DSHS[166.9984]EEDAS[166.:       | 0.343  | 0.022    | -0.005    | 0 | 21.77 | 18 | 93  | 6  | 583  | -1.97 |
| 1570.7 | 7  | Q5M775      | K.SVSSPTSNTPPTK SVSS[166.9984]PTSNTPPTK 2       | 1.478  | 1.60E-04 | -0.003    | 0 | 46    | 21 | 46  | 2  | 1068 | -1.93 |
| 3326.4 | 19 | Q5PRF9      | R.AAFTTPDHAPLSPQ AAFTTPDHAPL[166.9984]PQS: 3    | 2.682  | 4.90E-05 | -0.01     | 0 | 50.35 | 20 | 50  | 2  | 694  | -3.06 |
| 3326.4 | 13 | Q5PRF9      | R.AAFTTPDHAPLSPQ AAFTT[181.014]PDHAPLSPQS: 3    | 1.544  | 5.30E-06 | -0.01     | 0 | 60.07 | 20 | 60  | 2  | 694  | -3.06 |
| 3326.4 | 12 | Q5PRF9      | R.AAFTTPDHAPLSPQ AAFTTPDHAPLSPQS[166.9984]: 3   | 2.688  | 1.30E-05 | -0.01     | 0 | 56.01 | 20 | 56  | 4  | 694  | -3.06 |
| 2855.2 | 12 | Q5PRF9      | R.QGSDDEWGGPAELG QGS[166.9984]DEWGGPAELGP 3     | 0.889  | 0.006    | -0.005    | 1 | 30.29 | 21 | 70  | 3  | 694  | -1.67 |
| 2289   | 13 | Q5QJ6E      | K.ESYTIEVSEAESHV. ESYTIEVS[166.9984]EAHVSH: 3   | 0.421  | 0.019    | -1.00E-04 | 0 | 25.57 | 21 | 26  | 5  | 756  | -0.05 |
| 4523   | 21 | Q5SSJ5      | K.LAEGEEKEPPDJS LAEGEEKEPPDJSSEESVSTVEEQ 4      | 0.038  | 1.50E-05 | -0.01     | 1 | 46.37 | 18 | 92  | 1  | 553  | -2.15 |
| 4523   | 19 | Q5SSJ5      | K.LAEGEEKEPPDJS LAEGEEKEPPDJSSEESV[166.9        | 0.206  | 3.60E-04 | -0.013    | 1 | 39.88 | 18 | 72  | 3  | 553  | -2.9  |
| 4523   | 22 | Q5SSJ5      | K.LAEGEEKEPPDJS LAEGEEKEPPDJSSEESVST[181.4      | 0.191  | 4.20E-04 | -0.011    | 1 | 38.93 | 18 | 77  | 4  | 553  | -2.35 |
| 4523   | 29 | Q5SSJ5      | K.LAEGEEKEPPDJS LAEGEEKEPPDJS[166.9984]SEI 4    | 0.206  | 0.002    | -0.011    | 1 | 32.6  | 18 | 72  | 3  | 553  | -2.35 |
| 4523   | 15 | Q5SSJ5      | K.LAEGEEKEPPDJS LAEGEEKEPPDJSSEESVSTVEEQ 4      | 0.206  | 9.60E-04 | -0.01     | 1 | 35.28 | 18 | 72  | 3  | 553  | -2.15 |
| 4523   | 20 | Q5SSJ5      | K.LAEGEEKEPPDJS LAEGEEKEPPDJSSEESVSTVEEQ 4      | 0.319  | 2.00E-05 | -0.01     | 1 | 52.18 | 18 | 75  | 4  | 553  | -2.15 |
| 4602.9 | 24 | Q5SSJ5      | K.LAEGEEKEPPDJS LAEGEEKEPPDJSSEESVST[181.4      | -0.11  | 0.011    | -0.01     | 1 | 24.49 | 17 | 75  | 4  | 553  | -2.1  |
| 3512.7 | 22 | Q5T035.QSNZ | K.PVAPQVPSGGAPG.PVAPQVPS[166.9984]PGGAPG: 3     | 1.019  | 0.005    | -0.007    | 0 | 27.54 | 17 | 28  | 3  | 203  | -2.93 |
| 4713.1 | 20 | Q5T028      | K.DTPPGVPEKSLGGS DTP[181.014]PVGPEKS[166.99     | 0.003  | 0.04     | -0.014    | 1 | 18.72 | 17 | 19  | 3  | 1188 | -2.01 |
| 1535.6 | 9  | Q5T1M5      | R.SLSLGDDEEDLFK.G SLS[166.9984]GDEEDLFK 2       | -0.584 | 0.02     | -0.002    | 0 | 23.52 | 19 | 24  | 2  | 1219 | -1.48 |
| 3078.5 | 13 | Q5T1M5      | R.LSLSDPEEGDPLAL LSLSDPEEGDPLALGPES[166.99      | 0.528  | 0.014    | -0.004    | 0 | 25.63 | 20 | 49  | 4  | 1219 | -1.42 |
| 1481.7 | 7  | Q5T200      | K.TSAGVSPDLLDQQR.T SAGVSS[166.9984]PLLDQQR 2    | -0.843 | 0.037    | -0.003    | 0 | 22.93 | 21 | 68  | 16 | 1668 | -1.93 |
| 1954.7 | 19 | Q5T200      | K.SKAGSDSIDDEAAQ SKAGSDS[166.9984]DIS[166.998   | 0.579  | 0.001    | -0.004    | 1 | 34.15 | 18 | 68  | 16 | 1668 | -2.32 |
| 994.46 | 5  | Q5T200      | K.EVSPVVR.S EVS[166.9984]PEVVR 2                | -0.822 | 0.033    | -0.002    | 0 | 21.14 | 19 | 68  | 16 | 1668 | -1.93 |
| 1788.8 | 11 | Q5T200      | R.GNIETSEDGQVFS GNIETTS[166.9984]EDGQVFSPI 2    | -0.271 | 0.01     | -0.004    | 0 | 28.65 | 21 | 68  | 16 | 1668 | -2.39 |
| 1321.6 | 12 | Q5T200      | R.SLSPSHLTDR.Q. SLS[166.9984]PSHLTDR 2          | -0.7   | 0.024    | -0.002    | 0 | 23.36 | 20 | 68  | 16 | 1668 | -1.79 |
| 1840.7 | 14 | Q5T200      | R.SASPPSHLSLSPQF S[166.9984]AS[166.9984]P       |        |          |           |   |       |    |     |    |      |       |

|        |    |             |                   |                                          |   |        |          |           |     |       |    |     |    |      |       |
|--------|----|-------------|-------------------|------------------------------------------|---|--------|----------|-----------|-----|-------|----|-----|----|------|-------|
| 1517.6 | 6  | QSVT52      | K.LESESTSPLEMK.I  | LESESTSPS[166.9984]LEMK                  | 2 | 0.73   | 0.001    | -0.003    | 0   | 36.56 | 19 | 176 | 10 | 1461 | -2.2  |
| 1517.6 | 14 | QSVT52      | K.LESESTSPLEMK.I  | LESEST[181.014]SPLEMK                    | 2 | -0.404 | 0.014    | -0.003    | 0   | 25.35 | 19 | 198 | 8  | 1461 | -2.2  |
| 1961.8 | 17 | QSVTR2      | K.ALVVPEPEPDSNS   | ALVVPEPEPDS[166.9984]DSNQ                | 3 | 0.627  | 0.011    | -0.003    | 0   | 27.67 | 21 | 37  | 4  | 975  | -1.73 |
| 1961.8 | 8  | QSVTR2      | K.ALVVPEPEPDSNS   | ALVVPEPEPDS[166.9984]NQ                  | 2 | -0.152 | 0.008    | -0.005    | 0   | 28.84 | 20 | 37  | 4  | 975  | -2.64 |
| 1714.8 | 8  | QSVTR2      | R.SGSALLQSQSSTEDI | SGSALLQSQS[166.9984]QSSTEDP              | 2 | -0.412 | 0.013    | 0.001     | 0   | 27.21 | 21 | 71  | 3  | 975  | 0.64  |
| 2805.2 | 22 | QSVU4A      | R.LGSPVNDLEMDR    | LGS[166.9984]PVDNLEMDR                   | 3 | 1.945  | 5.30E-04 | -0.006    | 1   | 40.81 | 21 | 41  | 9  | 2279 | -1.99 |
| 1762.8 | 8  | QSVW69      | K.RPLDSPAEEALPAM  | RPLDSPAEEALPAM                           | 3 | 0.967  | 0.005    | -0.003    | 1   | 31.07 | 21 | 33  | 2  | 929  | -1.8  |
| 3391.6 | 10 | QSVW69      | K.IPPMLSPVHQDST   | IPPMLSPVHQDST                            | 3 | 0.232  | 0.028    | -0.007    | 0   | 21.68 | 19 | 49  | 2  | 929  | -1.9  |
| 2612.1 | 13 | QSVZ89      | K.HSQSPPEPHSPTPE  | HSQSPPEPHS[166.9984]QPSPEHS              | 3 | 0.38   | 0.024    | -0.006    | 0   | 24.14 | 20 | 24  | 2  | 1673 | -2.15 |
| 2612.1 | 14 | QSVZ89      | K.HSQSPPEPHSPTPE  | HSQSPPEPHS[166.9984]PEHS                 | 3 | 0.394  | 0.022    | -0.006    | 0   | 24.34 | 20 | 24  | 3  | 1673 | -2.15 |
| 1978.9 | 16 | QSVZK9      | K.SERPPTLMTLEPSS  | SERPPTLMTLEPSS[166.9984]SPI              | 3 | 0.397  | 0.021    | -0.004    | 1   | 25.31 | 21 | 25  | 3  | 1371 | -2.12 |
| 2105.9 | 17 | QSVZL5      | R.VTQHESDNENEIQ   | VTQHESDNENEIQ[181.014]QHESDNENEIQ        | 3 | 0.233  | 0.028    | -0.005    | 0   | 24.68 | 22 | 65  | 5  | 1548 | -2.18 |
| 2105.9 | 14 | QSVZL5      | R.VTQHESDNENEIQ   | VTQHESDNENEIQ[166.9984]DNENEIQ           | 3 | #####  | 0.048    | -0.005    | 0   | 22.34 | 22 | 70  | 3  | 1548 | -2.18 |
| 2202   | 11 | QSWOZ9      | R.LVGMDDPEQASVTN  | LVGMDDPEQAS[166.9984]VTNQ                | 2 | 1.978  | 1.80E-05 | -0.005    | 0   | 55.63 | 21 | 56  | 4  | 365  | -2.44 |
| 1217.5 | 7  | Q5XKES      | K.YEELQVTAGK.H    | YEELQVT[181.014]AGK                      | 2 | -0.803 | 0.033    | -0.002    | 0   | 22.3  | 20 | 49  | 3  | 535  | -1.67 |
| 2169.9 | 11 | Q63HN8      | K.EDQEAALLSEPEE   | EDQEAALLS[166.9984]EPEE                  | 3 | 1.978  | 3.10E-05 | -0.005    | 0   | 51.87 | 19 | 121 | 7  | 5207 | -2.42 |
| 3221.4 | 16 | Q63HN8      | R.EAAEPLSEPKEDQE  | EAAEPLSEPKEDQEAALLS[166.9984]E           | 3 | 1.41   | 6.00E-05 | -0.006    | 1   | 50.27 | 21 | 121 | 7  | 5207 | -1.93 |
| 3508.4 | 34 | Q63HN8      | R.LPPAAPADSENNN   | LPPAAPADSENNN[166.9984]MAS               | 3 | 0.046  | 0.045    | -0.005    | 0   | 18.82 | 18 | 95  | 11 | 5207 | -1.58 |
| 2816.1 | 10 | Q63HN8      | K.EGGPCFLPFGSDV   | EGGPCFLPFGSDV[160.0307]LFGSDV            | 3 | 0.141  | 0.042    | -0.006    | 0   | 17.74 | 16 | 74  | 8  | 5207 | -2.15 |
| 3428.4 | 20 | Q63HN8      | R.LPPAAPADSENNN   | LPPAAPADSENNN[166.9984]MAS               | 3 | 1.559  | 0.001    | -0.009    | 0   | 36.15 | 19 | 95  | 11 | 5207 | -2.75 |
| 1999.9 | 13 | Q641Q2.Q5SN | K.ETVSEAPPLLFSD   | ETVSEAPPLFS[166.9984]DEE                 | 2 | -0.252 | 0.009    | -0.002    | 0   | 28.81 | 21 | 29  | 2  | 929  | -1.02 |
| 3801.6 | 29 | Q658Y4      | R.SPVQEASSATD     | SPVQEASSATD[181.014]DTNS                 | 3 | 2.572  | 1.30E-05 | -0.007    | 0   | 56.2  | 20 | 56  | 1  | 838  | -1.77 |
| 3801.6 | 26 | Q658Y4      | R.SPVQEASSATD     | SPVQEASSATD[166.9984]TNS                 | 3 | 1.668  | 3.50E-09 | -0.007    | 0   | 91.8  | 20 | 92  | 2  | 838  | -1.77 |
| 3801.6 | 27 | Q658Y4      | R.SPVQEASSATD     | SPVQEASSATD[181.014]NS                   | 3 | 1.472  | 2.10E-09 | -0.007    | 0   | 94.14 | 20 | 94  | 1  | 838  | -1.77 |
| 2110.9 | 12 | Q659C4      | K.LNGPGENVSEDEAC  | LNGPGENVSE[166.9984]EDEAQS               | 2 | 2.735  | 9.80E-07 | -0.005    | 0   | 67.85 | 20 | 68  | 2  | 914  | -2.5  |
| 3340.5 | 16 | Q66K14      | R.KASVVDPTSESPAI  | KASVVDPTSESPAI[166.9984]VDPSTESPASP      | 3 | 0.439  | 0.019    | -1.00E-04 | 1   | 24.75 | 20 | 25  | 2  | 1250 | -0.04 |
| 3132.4 | 13 | Q66K14      | K.ASVVDPTSESPAI   | ASVVDPTSESPAI[166.9984]QEGSEQPASP        | 3 | 0.281  | 0.03     | -0.006    | 0   | 23.16 | 20 | 36  | 3  | 1250 | -2.83 |
| 1949.8 | 17 | Q66K74      | K.AVPMAPAPASPGS   | AVPMAPAPAS[166.9984]PGSS                 | 2 | 1.613  | 1.40E-04 | -0.006    | 0   | 46.49 | 20 | 46  | 1  | 1059 | -2.85 |
| 1949.8 | 7  | Q66K74      | K.AVPMAPAPASPGS   | AVPMAPAPASPGSS[166.9984]S                | 2 | 1.454  | 2.00E-04 | -0.006    | 0   | 44.85 | 20 | 55  | 3  | 1059 | -2.85 |
| 1949.8 | 17 | Q66K74      | K.AVPMAPAPASPGS   | AVPMAPAPASPGS[166.9984]S                 | 2 | 2.011  | 5.60E-05 | -0.006    | 0   | 50.37 | 20 | 50  | 2  | 1059 | -2.85 |
| 4675.1 | 10 | Q66K74      | R.AGGGAEETPPTS    | AGGGAEETPPTS[166.9984]VSESLS             | 4 | 0.296  | 0.02     | -0.016    | 0   | 23.61 | 19 | 57  | 4  | 1059 | -3.38 |
| 1783.7 | 9  | Q66P13      | R.SAGEEEDPVLTDE   | SAGEEEDPVLTDE[166.9984]GEEEDPVLTDEQ      | 2 | 2.732  | 5.20E-06 | -0.004    | 0   | 60.1  | 20 | 60  | 1  | 360  | -2.27 |
| 2489.1 | 15 | Q69YH5      | K.GSSDAVSPDTFTAE  | GSSDAVSPDTFTAE[166.9984]PDTFTAEV         | 2 | -0.899 | 0.046    | -0.002    | 0   | 21.3  | 20 | 21  | 3  | 1023 | -0.83 |
| 2489.1 | 10 | Q69YH5      | K.GSSDAVSPDTFTAE  | GSS[166.9984]DAVSPDTFTAEV                | 2 | -0.484 | 0.018    | -0.002    | 0   | 25.42 | 20 | 25  | 3  | 1023 | -0.83 |
| 1243.5 | 5  | Q69YN4      | R.SFLSESPSPGR.T   | SFLSESPSPGR.T                            | 2 | -0.902 | 0.037    | -0.002    | 0   | 21.34 | 20 | 50  | 5  | 1812 | -1.32 |
| 2843.3 | 13 | Q69YN4      | R.GPRTPPGPPDDI    | GPRTPPGPPDDI[181.014]PGPPPPDDI           | 3 | 2.572  | 9.10E-05 | -0.007    | 1   | 48.96 | 21 | 50  | 5  | 1812 | -2.52 |
| 1037.5 | 11 | Q69YQ0      | R.TPLSPSPMK.T     | TPLSPSPMK.T                              | 2 | -0.096 | 0.007    | -0.002    | 0   | 26.35 | 17 | 26  | 4  | 1117 | -2.02 |
| 1931.0 | 10 | Q69YQ0      | R.KGSSGNASEVSAK   | KGSSGNASEVSAK[166.9984]GNASEVSAK         | 2 | 2.928  | 4.40E-06 | -0.005    | 1   | 62.73 | 22 | 63  | 5  | 1117 | -2.66 |
| 1747.8 | 9  | Q69YQ0      | R.SSSTDILEPFTVER  | SSSTDILEPFTVER[181.014]SILEPFTVER        | 2 | -0.926 | 0.047    | -0.005    | 0   | 22    | 21 | 22  | 2  | 2036 | -3.03 |
| 1247.6 | 4  | Q6IAA8      | K.LLLDSSPPTK.A    | LLLDSSPPTK.A                             | 2 | -0.77  | 0.029    | -0.002    | 0   | 23.61 | 21 | 24  | 2  | 161  | -1.67 |
| 1247.6 | 12 | Q6IAA8      | K.LLLDSSPPTK.A    | LLLDSSPPTK.A                             | 2 | -0.8   | 0.032    | -0.002    | 0   | 23.26 | 21 | 23  | 2  | 161  | -1.67 |
| 1076.5 | 6  | Q6IE81      | K.VPTTPASPVK.N    | VPTTPASPVK.N                             | 2 | -0.772 | 0.033    | -0.002    | 0   | 22.61 | 20 | 23  | 3  | 842  | -2.1  |
| 4713.8 | 22 | Q6IN85      | K.TNLTQSSTNLPGR   | TNLTQSSTNLPGR[181.014]T                  | 4 | -0.084 | 0.046    | 0.007     | 1   | 17.91 | 17 | 18  | 3  | 833  | 1.4   |
| 2329.1 | 16 | Q6IQ49      | R.VVNTDHGSEQLQV   | VVNTDHGSEQLQV[181.014]DHGSEQLQV          | 3 | 0.648  | 0.012    | -0.003    | 0   | 27.82 | 21 | 28  | 1  | 451  | -1.25 |
| 1362.6 | 10 | Q6KC79      | K.AAMYDIISPSK.D   | AAMYDIISPSK.D                            | 2 | 2.085  | 1.50E-05 | -0.002    | 0   | 55.92 | 20 | 103 | 4  | 2804 | -1.51 |
| 1180.6 | 8  | Q6KC79      | K.AITSLGGGSPK.N   | AITSLGGGSPK.N                            | 2 | 2.085  | 1.10E-06 | -0.002    | 0   | 67.44 | 20 | 103 | 4  | 2804 | -1.37 |
| 2770   | 24 | Q6N0K4      | K.DGDEKTEDEAEPY   | DGDEKTEDEAEPY[181.014]DEAEPYS            | 3 | 0.569  | 0.013    | -0.006    | 1   | 25.09 | 19 | 25  | 1  | 205  | -2.07 |
| 2690   | 19 | Q6N0K4      | K.DGDEKTEDEAEPY   | DGDEKTEDEAEPY[166.9984]D                 | 3 | 1.394  | 0.001    | -0.007    | 1   | 36.76 | 20 | 38  | 3  | 255  | -2.68 |
| 3065.4 | 11 | Q6NXT4      | K.GTDDLNPVSTPAK   | GTDDLNPVSTPAK[166.9984]S                 | 2 | 1.544  | 5.40E-04 | -0.005    | 1   | 40.73 | 21 | 41  | 2  | 461  | -1.49 |
| 1371.6 | 13 | Q6NZ12      | K.SFTPDHVVYAR.S   | SFTPDHVVYAR.S[166.9984]FTPDHVVYAR        | 2 | -0.817 | 0.031    | -9.00E-04 | 0   | 23.16 | 21 | 23  | 2  | 390  | -0.65 |
| 2197.9 | 23 | Q6NZY4      | K.KSEAGHASSPDESV  | KSEAGHASSPDESV[166.9984]PDESVT           | 3 | 0.373  | 0.02     | -0.003    | 0   | 25.08 | 21 | 25  | 3  | 707  | -2.37 |
| 2197.9 | 23 | Q6NZY4      | K.KSEAGHASSPDESV  | KSEAGHASSPDS[166.9984]JEVT               | 3 | 0.215  | 0.028    | -0.003    | 1   | 23.88 | 21 | 35  | 4  | 707  | -1.37 |
| 2069.8 | 18 | Q6NZY4      | K.SEAGHASSPDESV   | SEAGHASSPDESV[166.9984]PDESVT            | 3 | 0.842  | 0.008    | -0.004    | 0   | 28.82 | 20 | 27  | 6  | 707  | -1.81 |
| 2205.7 | 11 | Q6P158      | R.GLSEEEDEPDCC    | GLS[166.9984]GEEDEPDCC[162               | 2 | 1.978  | 1.40E-06 | -0.005    | 0   | 61.28 | 15 | 83  | 3  | 1386 | -2.5  |
| 3700.3 | 18 | Q6P158      | R.DLQEQDADAGSER   | DLQEQDADAGS[166.9984]ERG                 | 3 | 1.41   | 4.40E-04 | -0.005    | 1   | 37.71 | 17 | 83  | 3  | 1386 | -1.32 |
| 1513.6 | 15 | Q6P158      | R.DLQEQDADAGSER   | DLQEQDADAGS[166.9984]ER                  | 2 | -0.655 | 0.023    | -0.002    | 0   | 24.12 | 19 | 84  | 4  | 1386 | -1.48 |
| 1605.7 | 10 | Q6P1X5      | K.DKEPFTSSPASGR   | DKEPFTSSPASGR[166.9984]PASGR             | 2 | -0.71  | 0.025    | -0.002    | 1   | 22.71 | 21 | 24  | 2  | 1199 | -1.48 |
| 2962.2 | 22 | Q6P2E9      | R.DSQDASAEQSDHD   | DSQDASAEQSDHD[166.9984]AEQSDHDD          | 3 | 0.626  | 0.012    | -0.007    | 0   | 26.66 | 20 | 27  | 7  | 1401 | -2.4  |
| 2962.2 | 11 | Q6P2E9      | R.DSQDASAEQSDHD   | DSQDASAEQSDHD[166.9984]DHD               | 3 | 0.992  | 0.005    | -0.007    | 0   | 30.25 | 20 | 30  | 2  | 1401 | -2.4  |
| 2962.2 | 14 | Q6P2E9      | R.DSQDASAEQSDHD   | DSQDASAEQSDHDEVAS[166.9984]S             | 3 | 0.778  | 0.009    | -0.007    | 0   | 28.12 | 20 | 28  | 2  | 1401 | -2.4  |
| 1912.8 | 18 | Q6P4E1      | R.FFDENESPVDPQH   | FFDENESPVDPQH[166.9984]PVDPQHG           | 3 | 0.19   | 0.035    | -0.004    | 0   | 22.23 | 20 | 22  | 1  | 433  | -2.15 |
| 1075.4 | 8  | Q6P4Q7      | R.SASLSVPRD.T     | SASLSVPRD.T                              | 2 | -0.817 | 0.031    | -0.002    | 0   | 22.16 | 20 | 22  | 2  | 775  | -2.19 |
| 3268.6 | 8  | Q6P4R8      | K.SAEADLAEPLSSTEG | SAEADLAEPLSSTEGVAPLS[166.9984]S          | 3 | 0.224  | 0.029    | -0.005    | 0   | 21.64 | 19 | 22  | 2  | 1299 | -1.58 |
| 1900.7 | 7  | Q6P5R6      | R.YFQSQDEDESEEL   | YFQSQDEDESEEL[166.9984]ESED              | 2 | 1.978  | 5.30E-05 | -0.004    | 0   | 47.7  | 17 | 82  | 2  | 122  | -2.21 |
| 2547   | 25 | Q6P6C2      | K.YQEDSDPERSDYE   | YQEDSDPERSDYE[166.9984]DERSDY[243        | 3 | 0.486  | 0.015    | -0.007    | 1   | 24.26 | 19 | 24  | 2  | 924  | -2.94 |
| 2547   | 13 | Q6P6C2      | K.YQEDSDPERSDYE   | YQEDSDPERSDYE[166.9984]DERSDY[166.9984]S | 3 | 0.222  | 0.029    | -0.007    | 1   | 21.55 | 19 | 22  | 1  | 394  | -2.94 |
| 1883.7 | 21 | Q6P062      | K.GEEGSDDEETENG   | GEEGSDDEETENG[166.9984]DDEETENGP         | 2 | 1.978  | 4.30E-05 | -0.002    | 1   | 48.45 | 17 | 103 | 5  | 1173 | -0.92 |
| 2436   | 18 | Q6P062      | K.KGGEFDEFVNDT    | KGGEFDEFVNDT[181.014]DDI                 | 3 | 1.379  | 0.002    | -0.004    | 1   | 35.19 | 21 | 103 | 5  | 1173 | -1.7  |
| 995.46 | 6  | Q6P1F5      | K.SVSLQEP.R.S     | SVSLQEP.R.S[166.9984]LQEP                | 2 | -0.362 | 0.013    | -0.002    | 0   | 24.69 | 18 | 25  | 3  | 876  | -1.64 |
| 1374.6 | 6  | Q6P1T7      | R.DLVQDKPASP.K    | DLVQDKPASP.K[166.9984]PK                 | 2 | -0.255 | 0.01     | -0.003    | 1   | 21.81 | 20 | 28  | 2  | 736  | -2.08 |
| 2729.1 | 8  | Q6PKG0      | K.NFTTAWSDDEESY   | NFTTAWSDDEESY[166.9984]DYEI              | 3 | 0.222  | 0.031    | -0.004    | 1   | 21.62 | 19 | 92  | 8  | 1096 | -1.63 |
| 3607.6 | 24 | Q6PKG0      | R.ESPRLQLPGAEP    | ESPRLQLPGAEP[166.9984]PAIS               | 3 | 0.038  | 0.004    | -0.007    | 1   | 31.2  | 19 | 92  | 8  | 1096 | -1.9  |
| 1540.7 | 6  | Q6PKG0      | R.SLPTTVPESPNYR   | SLPTTVPESPNYR[166.9984]PNYR              | 2 | -0.161 | 0.008    | -0.003    | 0   | 28.75 | 20 | 92  | 8  | 1096 | -1.82 |
| 2809.1 | 18 | Q6PKG0      | K.NFTTAWSDDEESY   | NFTTAWSDDEESY[166.9984]DEESDY[2          | 3 | 0.422  | 0.021    | -0.007    | 1   | 22.62 | 18 | 92  | 8  | 1096 | -2.48 |
| 3687.6 | 21 | Q6PKG0      | R.ESPRLQLPGAEP    | ES[166.9984]PRQLPGAEP                    | 3 | 0.638  | 0.012    | -0.007    | 1   | 25.74 | 19 | 214 | 14 | 1096 | -1.87 |
| 2809.1 | 12 | Q6PKG0      | K.NFTTAWSDDEESY   | NFTTAWSDDEESY[166.9984]DEES[166.9984]S   | 3 | 1.544  | 0.001    | -0.007    | 1   | 34.97 | 18 | 144 | 14 | 1096 | -2.48 |
| 2053   | 11 | Q6PKG0      | K.GLSASLPDLSN.W   | GLSASLPDLSN.W[166.9984]LPDLSN.W          | 2 | -0.332 | 0.011    | -0.003    | 0   | 27.97 | 21 | 148 | 9  | 1096 | -1.61 |
| 1620.7 | 5  | Q6PKG0      | R.SLPTTVPESPNYR   | S[166.9984]LPTTVPESPNY[243.2             | 2 | -0.697 | 0.024    | -0.003    | 0</ |       |    |     |    |      |       |

|        |    |             |                                                   |        |          |           |   |       |    |     |    |      |       |
|--------|----|-------------|---------------------------------------------------|--------|----------|-----------|---|-------|----|-----|----|------|-------|
| 3426.4 | 35 | Q6ZRS2      | R.LQPPSPPLGPEGSVEI LQPPS[166.9984]PLGPEGSVEES 3   | 1.41   | 9.30E-04 | -0.006    | 0 | 36.75 | 19 | 37  | 5  | 3230 | -1.85 |
| 3426.4 | 18 | Q6ZRS2      | R.LQPPSPPLGPEGSVEI LQPPSPPLGPEGS[166.9984]VEES 3  | 0.129  | 0.038    | -0.006    | 0 | 20.65 | 19 | 22  | 6  | 3230 | -1.85 |
| 1456.7 | 9  | Q6ZRV2      | K.VVPPGPGSGGNGP VVPPGPGS[166.9984]GGNGPEI 2       | -0.469 | 0.014    | -0.002    | 0 | 26.67 | 21 | 60  | 7  | 1179 | -1.68 |
| 1899.8 | 6  | Q6ZRV2      | R.RLSLGGQDSTEAAT RLS[166.9984]LGGQDSTEAATEI 2     | -0.146 | 0.007    | -0.006    | 1 | 29.9  | 21 | 60  | 7  | 1179 | -3.35 |
| 1214.6 | 9  | Q6ZRV2      | R.KGSPPTPGFSTR.R KGS[166.9984]PTPGFSTR 2          | 0.233  | 0.003    | -0.002    | 1 | 33.69 | 21 | 60  | 7  | 1179 | -1.84 |
| 1214.6 | 8  | Q6ZRV2      | R.KGSPPTPGFSTR.R KGSPT[181.014]PGFSTR 2           | -0.785 | 0.032    | -0.002    | 1 | 23.41 | 21 | 56  | 6  | 1179 | -1.84 |
| 1270.6 | 4  | Q6ZRV2      | R.RGSPVPPVPER.R RGS[166.9984]PVPVPER 2            | -0.497 | 0.014    | -0.003    | 1 | 25.42 | 20 | 81  | 10 | 1179 | -2.17 |
| 1469.6 | 8  | Q6ZS57      | K.VAILTDDEEQK.R VAILT[181.014]DDEEQK 2            | 1.666  | 1.10E-04 | -0.003    | 0 | 48.92 | 22 | 49  | 1  | 791  | -1.9  |
| 5121.1 | 8  | Q709C8      | R.QVSSIPIHSGTKGL QVS[166.9984]S[166.9984]PII 4    | -0.03  | 0.038    | 0.01      | 1 | 17.39 | 16 | 17  | 2  | 3753 | 2.01  |
| 2395.1 | 27 | Q70CQ2      | R.DSSIIDPGTEQDLPS DSSIIDPGTEQDLPS[PENS]166.5 3    | 0.75   | 0.009    | -0.005    | 0 | 28.83 | 21 | 29  | 6  | 3546 | -1.93 |
| 2395.1 | 12 | Q70CQ2      | R.DSSIIDPGTEQDLPS DSSIIDPGTEQDLPS[166.9984]P 2    | 1.186  | 3.50E-04 | -0.006    | 0 | 43.08 | 21 | 43  | 3  | 3546 | -2.64 |
| 1837.8 | 11 | Q715F6      | K.MEVEDGLGSPKPEE MEVEDGLGS[166.9984]PKPEEI 2      | -0.723 | 0.025    | -3.00E-04 | 1 | 25.13 | 22 | 25  | 3  | 2210 | -0.16 |
| 2348.9 | 7  | Q71U36,P683 | K.DYEEVGVDSVEGEC DYEEVGVDSVEGEEGEEY 2             | 0.205  | 0.003    | -0.005    | 0 | 33.41 | 21 | 41  | 3  | 2210 | -0.16 |
| 1118.6 | 12 | Q71U9,POC0  | R.GDEELDSU.K.A GDEELDSUK 2                        | -0.97  | 0.046    | -0.002    | 0 | 20.66 | 20 | 21  | 3  | 1167 | -2.18 |
| 2114.8 | 10 | Q76FK4      | R.FLETDSEEEQEVNE FLET[181.014]DS[166.9984]EEI 2   | 0.751  | 0.001    | -0.005    | 0 | 35.82 | 18 | 36  | 3  | 1167 | -2.18 |
| 2345.8 | 9  | Q76FK4      | R.LQDSSSEEDVTEE LQDS[166.9984]S[166.9984]S 2      | -0.189 | 0.009    | -0.006    | 0 | 21.37 | 13 | 21  | 4  | 1167 | -2.39 |
| 1713.8 | 10 | Q7L2J0      | R.TLNAETPKSSPLPAK TLNAET[181.014]PKSS[166.9984] 2 | -0.788 | 0.032    | -0.004    | 1 | 23.48 | 21 | 23  | 4  | 689  | -2.37 |
| 1351.6 | 8  | Q7L2J0      | R.CAPSAGSAAAAGV C[160.0307]APSAGS[166.9984] 2     | 1.813  | 7.30E-05 | -0.003    | 0 | 47.44 | 19 | 70  | 5  | 689  | -2.15 |
| 1713.8 | 9  | Q7L2J0      | R.TLNAETPKSSPLPAK TLNAET[181.014]PKS[166.9984] 2  | 0.047  | 0.005    | -0.004    | 1 | 31.8  | 21 | 63  | 3  | 689  | -2.37 |
| 2675.3 | 15 | Q7L2J0      | R.DITDPLSLNTCDE DITDPLSLNT[160.0307]TDEG 3        | 0.623  | 0.012    | -0.005    | 0 | 26.56 | 20 | 99  | 6  | 689  | -1.83 |
| 3279.4 | 17 | Q7L2J0      | R.CAPSAGSAAAAGV C[160.0307]APSAGS[166.9984] 3     | 1.544  | 7.70E-05 | -0.007    | 1 | 49.48 | 21 | 99  | 6  | 689  | -2.2  |
| 1197.5 | 6  | Q7L4I2      | K.EQSEVSVSPR.A EQSEVSVS[166.9984]PR 2             | 0.89   | 6.90E-04 | -0.002    | 0 | 38.26 | 19 | 38  | 1  | 434  | -1.84 |
| 4481.2 | 33 | Q7Z2T5      | R.DSAGVPAPAPDSAI DSAGVPAPAPDSALDAPTASAI 4         | 0.246  | 0.002    | -0.011    | 0 | 32.45 | 17 | 32  | 1  | 733  | -2.43 |
| 2897.2 | 8  | Q7Z2T5      | K.YSTPYTGGQSESH YSTPYTGGQSESHVQAS[166.9] 3        | 0.125  | 0.038    | -0.008    | 0 | 20.58 | 19 | 29  | 2  | 733  | -2.69 |
| 4481.2 | 19 | Q7Z2T5      | R.DSAGVPAPAPDSAI DSAGVPAPAPDSALDAPTASAI 4         | -0.11  | 1.30E-04 | -0.011    | 0 | 43.6  | 17 | 44  | 1  | 733  | -2.43 |
| 1544.6 | 11 | Q7Z2W4      | R.SCTSPDQIHR.A SC[160.0307][181.014]PS[166] 3     | 0.508  | 0.014    | -0.004    | 0 | 24.48 | 19 | 34  | 3  | 902  | -2.42 |
| 1481.7 | 8  | Q7Z2W4      | R.ASLEDAPVDDLTR.A AS[166.9984]LEDAPVDDLTR 2       | -0.123 | 0.007    | -0.002    | 0 | 31.08 | 22 | 37  | 6  | 902  | -1.1  |
| 1544.6 | 8  | Q7Z2W4      | R.SCTSPDQIHR.A S[166.9984]C[160.0307]TPS[16] 3    | 0.367  | 0.02     | -0.004    | 0 | 23    | 19 | 23  | 6  | 902  | -2.42 |
| 1464.6 | 7  | Q7Z2W4      | R.SCTSPDQIHR.A SC[160.0307]TPS[166.9984]PD 2      | -0.965 | 0.049    | -0.003    | 0 | 20.71 | 20 | 46  | 7  | 902  | -1.92 |
| 3323.4 | 14 | Q7Z2Z1      | R.SIVECQDASATPG SIVEC[160.0307]QPDASATPGV 3       | 2.701  | 5.70E-05 | -0.011    | 1 | 50.27 | 20 | 50  | 3  | 1910 | -3.39 |
| 3323.4 | 13 | Q7Z2Z1      | R.SIVECQDASATPG SIVEC[160.0307]QPDASATPGV 3       | 2.831  | 6.30E-06 | -0.011    | 1 | 59.87 | 20 | 60  | 3  | 1910 | -3.39 |
| 2002.9 | 10 | Q7Z3K3      | K.SLDSEVSPVSAKPP SLDSEVSPVSAKPPS[166.9984] 2      | 0.023  | 0.005    | -0.005    | 1 | 30.59 | 20 | 31  | 4  | 1410 | -2.38 |
| 3391.4 | 15 | Q7Z406      | R.LEEGVASDEEAEAE LEEGVAS[166.9984]DEEAEAEQ 3      | 1.41   | 8.20E-06 | -0.008    | 0 | 59.41 | 21 | 59  | 2  | 1995 | -2.4  |
| 3551.3 | 12 | Q7Z406      | R.LEEGVASDEEAEAE LEEGVAS[166.9984]DEEAEAEQ 3      | 0.083  | 0.044    | -0.008    | 0 | 21.19 | 20 | 47  | 4  | 1995 | -2.36 |
| 1722.6 | 13 | Q7Z417      | K.GADNDGSGSEGY GADNDGSG[166.9984]GSEGYTT 2        | 1.978  | 3.20E-08 | -0.003    | 0 | 80.6  | 18 | 170 | 5  | 695  | -1.54 |
| 1276.5 | 5  | Q7Z417      | R.NDSWGSFDLR.A NDS[166.9984]WGSFDLR 2             | -0.119 | 0.006    | -0.002    | 0 | 28.17 | 19 | 170 | 5  | 695  | -1.49 |
| 2428.1 | 21 | Q7Z417      | K.DYIEESQNLASPT DYIEESQNLAS[166.9984]PTNT 3       | 2.01   | 4.70E-04 | -0.003    | 0 | 41.5  | 21 | 170 | 5  | 695  | -1.32 |
| 1722.6 | 10 | Q7Z417      | K.GADNDGSGSEGY GADNDGSGSE[166.9984]GYTT 2         | 1.218  | 3.30E-04 | -0.003    | 0 | 40.49 | 18 | 137 | 6  | 695  | -1.54 |
| 1802.6 | 12 | Q7Z417      | K.GADNDGSGSEGY GADNDGSG[166.9984]GS[166.9] 2      | -0.09  | 0.007    | -0.005    | 0 | 24.39 | 15 | 174 | 7  | 695  | -2.54 |
| 1483.6 | 10 | Q7Z417      | K.NLSDEATNPISR.V NLS[166.9984]DEATNPISR 2         | 0.803  | 8.70E-04 | -0.003    | 0 | 38.25 | 20 | 139 | 4  | 695  | -1.96 |
| 3477.6 | 22 | Q7Z434      | K.EPSYMPMPVQTOAI EPSYMPMPVQTOAPES[166.998] 3      | 1.41   | 0.001    | -0.009    | 0 | 38.52 | 21 | 93  | 7  | 540  | -2.63 |
| 3557.5 | 21 | Q7Z434      | K.EPSYMPMPVQTOAI EPSYMPMPVQTOAPES[166.998] 3      | 1.41   | 4.70E-04 | -0.006    | 0 | 41.9  | 21 | 93  | 7  | 540  | -1.68 |
| 3477.6 | 21 | Q7Z434      | K.EPSYMPMPVQTOAI EPSYMPMPVQTOAPESGENSEQ 3         | 1.496  | 0.002    | -0.01     | 0 | 36.31 | 21 | 91  | 8  | 540  | -2.83 |
| 3477.6 | 9  | Q7Z434      | K.EPSYMPMPVQTOAI EPSYMPMPVQTOAPESGENSEQ 3         | 0.771  | 0.009    | -0.01     | 0 | 29.06 | 21 | 58  | 6  | 540  | -2.83 |
| 3477.6 | 10 | Q7Z434      | K.EPSYMPMPVQTOAI EPSYMPMPVQTOAPESGENSEQ[16] 3     | 1.374  | 4.50E-04 | -0.009    | 0 | 42.06 | 21 | 88  | 7  | 540  | -2.63 |
| 2502.1 | 13 | Q7Z456      | R.KLSSDAPAQDTGS KLS[166.9984]SDAPAQDTGSS 3        | 1.99   | 5.10E-04 | -0.007    | 1 | 41.25 | 21 | 41  | 3  | 1674 | -2.85 |
| 2502.1 | 25 | Q7Z456      | R.KLSSDAPAQDTGS KLS[166.9984]SDAPAQDTGSS 3        | 2.682  | 9.10E-05 | -0.007    | 1 | 48.73 | 21 | 49  | 4  | 1674 | -2.85 |
| 1358.5 | 8  | Q7Z4V5      | R.ARGDSALDEES.- ARGDS[166.9984]EALDEES 2          | -0.363 | 0.013    | -0.003    | 1 | 23.7  | 17 | 24  | 3  | 671  | -2.01 |
| 1594.7 | 13 | Q7Z4V5      | K.ADSGAKPEPVAM ADS[166.9984]DGAKPEPVAMA 2         | -0.649 | 0.023    | -0.004    | 1 | 24.73 | 21 | 25  | 1  | 671  | -2.24 |
| 1993.7 | 18 | Q7Z4V5      | R.GSGSGDLEDRLE GS[166.9984]GGS[166.9984]S 2       | -0.713 | 0.024    | -0.004    | 1 | 21.23 | 18 | 36  | 4  | 671  | -2.18 |
| 1285.6 | 7  | Q7Z589      | R.TNSSSSPVVLE.K TNS[166.9984]SSSSPVVLE 2          | -0.165 | 0.008    | -0.003    | 0 | 28.61 | 20 | 34  | 4  | 1322 | -2.12 |
| 1419.7 | 9  | Q7Z5K2      | K.RPESSEISPIK.G RPES[166.9984]PSEISPIK 2          | -0.004 | 0.005    | -0.003    | 1 | 31.32 | 21 | 80  | 4  | 1190 | -2.18 |
| 2653.1 | 17 | Q7Z5K2      | K.VEEESTGDPFGFDS VEEESTGDPFGFDS[166.9984]D 2      | 2.732  | 2.30E-06 | -0.004    | 0 | 64.05 | 20 | 80  | 4  | 1190 | -1.5  |
| 1582.6 | 12 | Q7Z5L9      | R.NSNSPPSSMNQI NSNSPPS[166.9984]PSSMNQR 2         | -0.019 | 0.005    | -0.005    | 0 | 30.17 | 20 | 43  | 3  | 587  | -2.35 |
| 1855.9 | 12 | Q7Z5L9      | K.LEEPELNROQSNPI LEEPELNROQ[166.9984]PNPR 3       | 0.128  | 0.036    | -0.004    | 1 | 22.68 | 21 | 43  | 3  | 587  | -2.35 |
| 1662.6 | 8  | Q7Z5L9      | R.NSNSPPSSMNQI NSNS[166.9984]PSSPS[166.998] 2     | -0.233 | 0.01     | -0.002    | 0 | 24.96 | 17 | 39  | 5  | 587  | -0.93 |
| 1582.6 | 17 | Q7Z5L9      | R.NSNSPPSSMNQI NSNSPPSPS[166.9984]MNQR 2          | -0.486 | 0.015    | -0.005    | 0 | 25.5  | 20 | 35  | 3  | 587  | -3.43 |
| 1662.6 | 9  | Q7Z5L9      | R.NSNSPPSSMNQI NSNS[166.9984]PSS[166.9984] 2      | -0.145 | 0.008    | -0.002    | 0 | 25.91 | 17 | 35  | 3  | 587  | -0.93 |
| 1850.7 | 5  | Q7Z6E9      | K.WDKDFESEEDV.V WDKDFES[166.9984]EEDV 2           | -0.049 | 0.006    | -0.004    | 1 | 27.87 | 18 | 33  | 4  | 1792 | -2.43 |
| 1421.5 | 8  | Q7Z6E9      | K.DDFESEEDV.V DDFES[166.9984]EEDV 2               | -0.715 | 0.028    | -0.003    | 0 | 19.16 | 16 | 58  | 10 | 1792 | -1.88 |
| 1419.7 | 9  | Q7Z6E9      | K.LEVTEIVKPSK.R LEVTEIVKPS[166.9984]PK 2          | 1.099  | 4.00E-04 | -0.002    | 1 | 40.25 | 19 | 69  | 9  | 1792 | -1.73 |
| 1577.6 | 10 | Q7Z6Z7      | R.GSGTASDDEFENLR GSGTAS[166.9984]DDEFENLR 2       | 1.484  | 1.90E-04 | -0.002    | 0 | 44.2  | 19 | 110 | 6  | 4374 | -1.6  |
| 1846.8 | 11 | Q7Z6Z7      | R.AGSSTPGDAPPV.AGSS[181.014]PGDAPPVAEV 2          | -0.41  | 0.012    | -0.004    | 0 | 27.16 | 21 | 119 | 10 | 4374 | -2.27 |
| 3367.4 | 25 | Q7Z6Z7      | R.REESPMVDQPS.P REESPMVDQPS[166.9984]P 3          | 1.472  | 7.00E-07 | -0.008    | 1 | 68.79 | 20 | 76  | 8  | 4374 | -2.4  |
| 1846.8 | 10 | Q7Z6Z7      | R.AGSSTPGDAPPV.AGSS[166.9984]TPGDAPPVAE 2         | 0.028  | 0.004    | -0.004    | 0 | 31.57 | 21 | 148 | 13 | 4374 | -2.27 |
| 3447.4 | 25 | Q7Z6Z7      | R.REESPMVDQPS.P REES[166.9984]PMDVDQPS[16] 3      | 1.559  | 7.70E-04 | -0.006    | 1 | 37.89 | 19 | 162 | 9  | 4374 | -1.71 |
| 1227.5 | 6  | Q7Z6Z7      | R.AESPEEVACR.K AES[166.9984]PEEVAC[160.03] 2      | -0.467 | 0.014    | -0.002    | 0 | 24.69 | 19 | 110 | 6  | 4374 | -1.97 |
| 3367.4 | 21 | Q7Z6Z7      | R.REESPMVDQPS.P REESPMVDQPS[166.9984] 3           | 1.41   | 5.50E-08 | -0.008    | 1 | 79.85 | 20 | 110 | 6  | 4374 | -2.4  |
| 3447.4 | 22 | Q7Z6Z7      | R.REESPMVDQPS.P REESPMVDQPS[166.9984] 3           | 1.559  | 6.00E-04 | -0.008    | 1 | 38.54 | 19 | 162 | 9  | 4374 | -2.35 |
| 4426.1 | 34 | Q7Z7K6      | R.AQEEGPEPPPEL AQEEGPEPPPELALLPPPPPI 4            | 0.206  | 0.014    | -0.008    | 0 | 22.87 | 17 | 23  | 2  | 275  | -1.89 |
| 4426.1 | 24 | Q7Z7K6      | R.AQEEGPEPPPEL AQEEGPEPPPELALLPPPPPI 4            | 0.191  | 0.005    | -0.008    | 0 | 27.16 | 17 | 27  | 2  | 275  | -1.89 |
| 1785.7 | 10 | Q7Z7N9      | R.GDPVWSETDALV.GDPVWSETDALVGS[166.9984] 2         | -0.662 | 0.025    | -0.005    | 0 | 23.74 | 20 | 24  | 1  | 219  | -2.64 |
| 1357.6 | 10 | Q865Q0      | R.LSTGTTVEDVQK.I LST[181.014]GTTVEDVQK 2          | 0.253  | 0.003    | -0.004    | 0 | 34.86 | 22 | 35  | 2  | 1253 | -2.56 |
| 2307   | 18 | Q86U42      | K.QMNNMSPGGNAG QMNNMS[166.9984]PPPGNAGP 3         | 1.022  | 0.005    | -0.003    | 0 | 31.62 | 21 | 32  | 2  | 306  | -1.77 |
| 4385.9 | 25 | Q86U42      | R.APPGAPGPGGSG APPGAPGPGGSGAPGS[166.99] 4         | 0.246  | 7.00E-04 | -0.008    | 0 | 37.36 | 18 | 79  | 3  | 306  | -1.16 |
| 4385.9 | 42 | Q86U42      | R.APPGAPGPGGSG APPGAPGPGGSG[166.9984]GAI 4        | -0.092 | 0.004    | -0.008    | 0 | 29.33 | 18 | 42  | 3  | 306  | -1.77 |
| 3137.2 | 37 | Q86U86      | K.GEADDEDDDEDG GEADDEDDDEDGQDNGQVTEC 3            | 1.41   | 0.001    | -0.008    | 0 | 34.11 | 17 | 34  | 4  | 1689 | -2.67 |
| 2651.1 | 14 | Q86U86      | R.ATSPSSVSGDFDD ATS[166.9984]PSSVSGDFDDG 3        | 0.921  | 0.007    | -0.006    | 0 | 29.54 | 20 | 30  | 2  | 1689 | -2.34 |
| 1895.8 | 14 | Q86UE4      | K.SQEPIPDQKQVSDI SQEPIPDQKQVS[166.9984]DDI 3      | 0.071  | 0.04     | -0.002    | 1 | 21.1  | 21 | 87  | 7  | 582  | -1.22 |
| 1183.5 | 9  | Q86UE4      | K.WNSVSPASAGK.R WNSVS[166.9984]PASAGK 2           | 1.523  | 1.40E-04 | -0.001    | 0 | 46.59 | 21 | 97  | 7  | 582  | -1.11 |
| 1183.5 | 13 | Q86UE4      | K.WNSVSPASAGK.R WNSVSPAS[166.9984]JAGK 2          | 1.338  | 2.30E-04 | -0.001    | 0 | 44.64 | 21 | 89  | 5  | 582  | -1.11 |
| 1130.4 | 5  | Q86UE4      | K.SETSWESPK.Q SETSWES[166.9984]PK 2               | -0.875 | 0.036    | -0.002    | 0 | 20.61 | 19 | 109 | 4  | 582  | -2.   |

|        |    |              |                                                  |        |          |          |   |       |    |     |    |      |       |
|--------|----|--------------|--------------------------------------------------|--------|----------|----------|---|-------|----|-----|----|------|-------|
| 2754.2 | 19 | Q86X29       | R.SVDALDDLTTPSTA SVDALDDLTTPSTAESGSR[S166.3      | 0.036  | 0.043    | -0.006   | 1 | 21.69 | 21 | 76  | 4  | 649  | -2.33 |
| 2754.2 | 18 | Q86X29       | R.SVDALDDLTTPSTA SVDALDDLTTPSTAESGSR[S166.3      | 0.523  | 0.014    | -0.006   | 1 | 26.66 | 21 | 40  | 5  | 649  | -2.33 |
| 2510   | 17 | Q86X53       | R.ARQEEGADASEEDF ARQEEGADAS[166.9984]EEDPT 3     | 0.285  | 0.029    | -0.008   | 1 | 23.19 | 20 | 23  | 1  | 443  | -3.03 |
| 2990.3 | 22 | Q86X95       | R.NLTANDPQSEYVVA NLTANDPQSEYVVA[166.9984]E 3     | 1.544  | 4.10E-04 | -0.007   | 0 | 42.08 | 21 | 42  | 2  | 450  | -2.18 |
| 3605.5 | 18 | Q86XP3       | R.YMAENPTAGVVQE YMAENPTAGVQEEEDNLEYD5 3          | 0.965  | 0.006    | -0.008   | 0 | 29.05 | 19 | 53  | 5  | 938  | -2.24 |
| 3733.6 | 18 | Q86XP3       | R.YMAENPTAGVVQE YMAENPTAGVQEEEDNLEYD5 3          | 1.41   | 2.20E-04 | -0.008   | 1 | 43.2  | 19 | 53  | 5  | 938  | -2.15 |
| 3733.6 | 15 | Q86XP3       | R.YMAENPTAGVVQE YMAENPTAGVQEEEDNLEY[24 3         | 1.394  | 4.80E-05 | -0.008   | 1 | 49.82 | 19 | 82  | 4  | 938  | -2.24 |
| 3605.5 | 24 | Q86XP3       | R.YMAENPTAGVVQE YMAENPTAGVQEEEDNLEY[24 3         | 1.374  | 5.80E-04 | -0.008   | 0 | 39.04 | 19 | 81  | 3  | 938  | -3.21 |
| 4669.9 | 20 | Q86Y91       | R.AMEGNSSDQEQSP AMEGNS[166.9984]DQEQSP E 4       | 0.038  | 0.035    | -0.015   | 0 | 21.15 | 19 | 21  | 2  | 864  | -3.21 |
| 4669.9 | 21 | Q86Y91       | R.AMEGNSSDQEQSP AMEGNS[166.9984]DQEQSP E 4       | 0.087  | 0.032    | -0.015   | 0 | 21.52 | 19 | 22  | 1  | 864  | -3.21 |
| 2350   | 22 | Q86YP4       | R.RPPSPDIVLSDNEI RPPS[166.9984]PDVIVLSDNEQ[ 3    | 1.443  | 0.002    | -0.004   | 1 | 35.83 | 21 | 90  | 8  | 633  | -2.63 |
| 2430   | 11 | Q86YP4       | R.RPPSPDIVLSDNEI RPPS[166.9984]PDVIVLSDNEQ[ 3    | 0.361  | 0.002    | -0.006   | 1 | 34.97 | 21 | 90  | 8  | 633  | -1.78 |
| 2350   | 17 | Q86YP4       | R.RPPSPDIVLSDNEI RPPS[166.9984]PDVIVLSDNEQ[ 3    | 1.339  | 0.002    | -0.004   | 1 | 34.79 | 21 | 90  | 8  | 633  | -1.75 |
| 1871.8 | 12 | Q8IU81       | R.AGGASPAASSTAQF AGGAS[166.9984]PAASSTAQPF 2     | 0.106  | 0.004    | -0.003   | 0 | 32.37 | 21 | 32  | 1  | 584  | -0.96 |
| 3820.7 | 14 | Q8IUW5       | R.AMVAADNSLYDPEFI AMVAADNSLYDPEFVPTSTPGSP[ 3     | 1.343  | 0.002    | -0.004   | 0 | 33.76 | 20 | 34  | 1  | 271  | -0.96 |
| 2439.1 | 16 | Q8IV36       | R.TGSQEGTSMEGSRF TGS[166.9984]QEGTSMEGSRP[ 3     | 0.192  | 0.033    | -0.007   | 1 | 23.32 | 21 | 23  | 2  | 788  | -2.72 |
| 2439.1 | 18 | Q8IV36       | R.TGSQEGTSMEGSRF T[181.014]GSQEGTSMEGSRP[ 3      | 0.343  | 0.024    | -0.007   | 1 | 24.76 | 21 | 25  | 1  | 788  | -2.57 |
| 1891.8 | 11 | Q8IV36       | R.SLEFPQQLSEDSI SLEFPQQLSEDS[166.9984]P[ 2       | 1.513  | 1.80E-04 | -0.005   | 0 | 45.35 | 20 | 52  | 2  | 788  | -2.38 |
| 2327.9 | 8  | Q8IV63       | R.LSFLSDGDSSEEDT LSLFSDGDSSES[166.9984]EDTL 2    | 1.086  | 4.40E-04 | -0.005   | 0 | 42.12 | 21 | 42  | 1  | 474  | -1.67 |
| 2252   | 12 | Q8IVF2       | R.DAHDVSPSTDTDE DAHDVSP[166.9984]TDEAC 3         | 1.057  | 0.004    | -0.004   | 0 | 31.97 | 21 | 35  | 9  | 5795 | -1.17 |
| 1373.7 | 8  | Q8IVF2       | R.KLPEGPVPEGASL K LPEGPVPEGAS[166.9984]LK 2      | -0.294 | 0.01     | -0.002   | 0 | 28.37 | 21 | 134 | 14 | 5795 | -1.68 |
| 995.47 | 5  | Q8IVF2       | R.ERLSPWPK.F ERLS[166.9984]WPK 2                 | -0.452 | 0.015    | -0.002   | 1 | 24.79 | 19 | 134 | 14 | 5795 | -1.68 |
| 2252   | 14 | Q8IVF2       | R.DAHDVSPSTDTDE DAHDV[166.9984]PTSTDTDEAC 2      | 2.9    | 4.70E-06 | -0.005   | 0 | 61.3  | 21 | 141 | 16 | 5795 | -1.67 |
| 1387.7 | 13 | Q8IVF2       | R.KLPEGPVPEGASL K LPEGPVPEGAS[166.9984]LK 2      | 0.925  | 6.10E-04 | -0.002   | 0 | 39.58 | 20 | 129 | 18 | 5795 | -1.67 |
| 2252   | 13 | Q8IVF2       | R.DAHDVSPSTDTDE DAHDVSP[181.014]STDTDEAQL 3      | 1.801  | 7.30E-04 | -0.004   | 0 | 39.34 | 21 | 141 | 16 | 5795 | -1.7  |
| 2331.9 | 7  | Q8IVF2       | R.DAHDVSPSTDTDE DAHDV[166.9984]PTSTDT[18: 3      | 1.305  | 0.002    | -0.004   | 0 | 33.48 | 20 | 103 | 14 | 5795 | -1.7  |
| 2183   | 10 | Q8IVF2       | R.KPDAEVLTVSEPEE KPDAEVLTVSES[166.9984]PEEEA 3   | 0.495  | 0.017    | -0.002   | 0 | 26.3  | 21 | 129 | 18 | 5795 | -0.4  |
| 907.48 | 5  | Q8IVF2       | R.VQRPSLK.M VQRPS[166.9984]LK 2                  | -0.109 | 0.007    | -0.002   | 1 | 28.13 | 19 | 118 | 12 | 5795 | -2.51 |
| 882.42 | 6  | Q8IVF2,Q8IVF | R.VQMPSLK.M VQMP[166.9984]LK 2                   | 0.682  | 0.001    | -0.001   | 0 | 34.13 | 17 | 134 | 10 | 134  | -1.53 |
| 916.4  | 4  | Q8IVF2,Q8IVF | R.VQMPSLK.M VQMP[166.9984]LK 2                   | -0.403 | 0.015    | -0.002   | 0 | 22.28 | 16 | 134 | 10 | 134  | -1.65 |
| 4986.3 | 23 | Q8IVF5       | R.NSSNEWGTGKTK NS[166.9984]S[166.9984]S[16: 5    | 0.413  | 0.009    | -0.007   | 1 | 25.65 | 18 | 26  | 5  | 1701 | -1.35 |
| 2109   | 5  | Q8IVL0       | R.TSLDGSQNDQD VV [166.9984]LDGSQNDQD VVU 3       | 0.171  | 0.033    | -0.01    | 0 | 23.07 | 21 | 23  | 8  | 2385 | -4.93 |
| 2109   | 9  | Q8IVL0       | R.TSLDGSQNDQD VV [166.9984]LDGSQNDQD VVU 3       | 0.092  | 0.039    | -0.01    | 0 | 22.32 | 21 | 22  | 4  | 2385 | -4.93 |
| 2911.2 | 17 | Q8IVP5       | R.NPPPDYSDSDS NPPPDY[243.029]ESDSDSVE 3          | 1.31   | 0.003    | -0.012   | 0 | 33.43 | 20 | 33  | 1  | 155  | -4.13 |
| 1735.8 | 6  | Q8IVT2       | R.RALSSDLSLPAPDA RALS[166.9984]SDLSLPAPDA R 2    | 1.24   | 3.00E-04 | -0.004   | 1 | 42.76 | 20 | 275 | 18 | 679  | -2.14 |
| 2444   | 13 | Q8IVT2       | R.NALFPEVFSPTPDE NALFPEVFS[166.9984]PTPDENS 2    | 1.978  | 1.10E-08 | -0.003   | 0 | 87.74 | 21 | 275 | 18 | 679  | -1.26 |
| 1776.8 | 11 | Q8IVT2       | R.ASTPDVWSEGPQP AS[166.9984]TPD VWSEGPQP G 2     | 0.489  | 0.002    | -0.003   | 0 | 37.25 | 22 | 275 | 18 | 679  | -1.78 |
| 1818.8 | 10 | Q8IVT2       | R.KSSTVATLQGTDPHCS S[181.014]VATLQGTDPHGD F 2    | -0.121 | 0.007    | -0.005   | 0 | 29.15 | 20 | 275 | 18 | 679  | -2.54 |
| 2444   | 10 | Q8IVT2       | R.NALFPEVFSPTPDE NALFPEVFSPTPDENSQNS[166 3       | 0.957  | 0.005    | -0.004   | 0 | 30.97 | 21 | 275 | 18 | 679  | -1.67 |
| 1579.7 | 11 | Q8IVT2       | R.RALSSDLSLPAPDA RALS[166.9984]SDLSLPAPDA R 2    | 1.971  | 5.80E-05 | -0.002   | 0 | 51.07 | 21 | 275 | 18 | 679  | -1.4  |
| 1579.7 | 11 | Q8IVT2       | R.RALSSDLSLPAPDA RALS[166.9984]SDLSLPAPDA R 2    | 1.27   | 2.70E-04 | -0.003   | 0 | 44.06 | 21 | 275 | 18 | 679  | -1.78 |
| 1735.8 | 10 | Q8IVT2       | R.RALSSDLSLPAPDA RALSSD[166.9984]LSLPAPDA R 3    | 0.605  | 0.013    | -0.004   | 1 | 26.41 | 20 | 308 | 22 | 679  | -2.03 |
| 2444   | 21 | Q8IVT2       | R.NALFPEVFSPTPDE NALFPEVFSPTPDENS[166.9984 3     | 1.832  | 7.10E-04 | -0.004   | 0 | 39.68 | 21 | 308 | 22 | 679  | -1.67 |
| 1776.8 | 10 | Q8IVT2       | R.ASTPDVWSEGPQP AS[181.014]PD VWSEGPQP GLJ 2     | 0.564  | 0.001    | -0.003   | 0 | 37.97 | 22 | 352 | 19 | 679  | -1.78 |
| 1659.7 | 16 | Q8IVT2       | R.RALSSDLSLPAPDA RALS[166.9984]SDLS[166.998: 2   | -0.685 | 0.025    | -0.004   | 0 | 23.41 | 20 | 355 | 20 | 679  | -2.67 |
| 1818.8 | 16 | Q8IVT2       | R.KSSTVATLQGTDPHCS S[166.9984]VATLQGTDPHGD 2     | -0.119 | 0.007    | -0.005   | 0 | 29.07 | 20 | 355 | 20 | 679  | -2.54 |
| 2444   | 17 | Q8IVT2       | R.NALFPEVFSPTPDE NALFPEVFSPT[181.014]PDENS: 3    | 1.947  | 5.40E-04 | -0.002   | 0 | 40.8  | 21 | 355 | 20 | 679  | -0.77 |
| 1815.8 | 18 | Q8IVT2       | R.RALSSDLSLPAPDA RALS[166.9984]SDS[166.9984] 2   | -0.426 | 0.014    | -0.002   | 1 | 27    | 21 | 355 | 20 | 679  | -1.23 |
| 1659.7 | 9  | Q8IVT2       | R.RALSSDLSLPAPDA RALS[166.9984]SDS[166.9984]I 2  | 0.205  | 0.009    | -0.003   | 0 | 28.21 | 20 | 355 | 20 | 679  | -1.71 |
| 1579.7 | 13 | Q8IVT2       | R.RALSSDLSLPAPDA RALSSD[166.9984]LSLPAPDA R 3    | 0.194  | 0.003    | -0.003   | 0 | 33.2  | 21 | 355 | 20 | 679  | -1.88 |
| 2600.1 | 20 | Q8IVT2       | R.RNALFPEVFSPTPDI RNALFPEVFSPT[181.014]PDENS: 3  | 1.046  | 0.005    | -0.005   | 1 | 31.81 | 21 | 352 | 19 | 679  | -1.65 |
| 1021.3 | 5  | Q8IVT2       | R.IYASEEEDD. - IYAS[166.9984]EEDD 1              | 0.331  | 0.002    | -0.002   | 0 | 27.74 | 13 | 303 | 22 | 679  | -1.72 |
| 1735.8 | 14 | Q8IVT2       | R.RALSSDLSLPAPDA RALS[166.9984]SDLSLPAPDA R 3    | 0.59   | 0.014    | -0.004   | 1 | 26.25 | 20 | 352 | 19 | 679  | -2.03 |
| 1659.7 | 9  | Q8IVT2       | R.RALSSDLSLPAPDA RALS[166.9984]SDLS[166.998: 2   | -0.542 | 0.019    | -0.003   | 0 | 24.87 | 20 | 303 | 22 | 679  | -1.71 |
| 1114.5 | 5  | Q8IVT2       | R.KSQSSDLLER.E SQS[166.9984]SOLLER 2             | 0.466  | 0.002    | -0.003   | 0 | 34.99 | 20 | 352 | 19 | 679  | -2.95 |
| 1450.7 | 7  | Q8IVT2       | R.HLSESGKPLSTK.Q HLS[166.9984]ESGKPLSTK 2        | -0.869 | 0.036    | -0.003   | 1 | 22.7  | 21 | 311 | 17 | 679  | -1.81 |
| 2600.1 | 17 | Q8IVT2       | R.RNALFPEVFSPTPDI RNALFPEVFSPTPDENS[166.998: 3   | 1.254  | 0.003    | -0.005   | 1 | 33.88 | 21 | 290 | 14 | 679  | -1.88 |
| 1815.8 | 7  | Q8IVT2       | R.RALSSDLSLPAPDA RALS[166.9984]SDS[166.9984] 3   | 0.328  | 0.023    | 5.00E-04 | 1 | 24.64 | 21 | 308 | 22 | 679  | 0.25  |
| 3277.2 | 13 | Q8IWA0       | R.K.EIPEDVDMEEKEIS EIPEDVDMEEKES[166.9984]E: 3   | 1.201  | 0.003    | -0.008   | 1 | 29.41 | 17 | 29  | 2  | 830  | -2.51 |
| 2135   | 11 | Q8IWA0       | R.K.VQDTSNTGLGEDIH VQDTS[166.9984]NTGLGEDIH: 3   | 0.42   | 0.018    | -0.003   | 0 | 25.56 | 21 | 47  | 3  | 830  | -1.37 |
| 2135   | 20 | Q8IWA0       | R.K.VQDTSNTGLGEDIH VQDTSNT[181.014]GLGEDIHQ 3    | 0.207  | 0.029    | -0.003   | 0 | 23.41 | 21 | 37  | 7  | 830  | -1.37 |
| 3197.2 | 18 | Q8IWA0       | R.K.EIPEDVDMEEKEIS EIPEDVDMEEKES[166.9984]E: 3   | 0.3    | 0.024    | -0.011   | 1 | 22.35 | 19 | 44  | 5  | 830  | -3.56 |
| 1069.5 | 6  | Q8IWB9       | R.K.SLSTEVEPK.E SLS[166.9984]TEVEPK 2            | -0.368 | 0.012    | -0.003   | 0 | 27.63 | 21 | 28  | 2  | 1127 | -2.97 |
| 4563.9 | 29 | Q8IWE2       | R.IHGWNSSGSEGAQF IHGWNSSGSEGAQNTENGVEPI1 4       | 0.038  | 2.30E-04 | -0.015   | 0 | 42.48 | 19 | 42  | 1  | 563  | -3.37 |
| 2857.1 | 13 | Q8IWS0       | R.K.TAHNSEADLEESFNI TAHNS[166.9984]EADLEESFNE: 3 | 0.547  | 0.015    | -0.007   | 0 | 24.87 | 19 | 38  | 3  | 365  | -2.62 |
| 2857.1 | 16 | Q8IWS0       | R.K.TAHNSEADLEESFNI TAHNS[166.9984]EADLEESFNE: 3 | 0.866  | 0.007    | -0.007   | 0 | 20.02 | 19 | 30  | 4  | 365  | -2.62 |
| 3193.5 | 18 | Q8IWWW6      | R.K.VLSTINNOAVETDI VLSSTINNOAVETDEGIEEIPDS[: 3   | 1.008  | 0.005    | -0.006   | 0 | 30.48 | 20 | 30  | 2  | 846  | -1.95 |
| 2556.2 | 16 | Q8IWWW6      | R.ATPPNQRGPRDPA ATT[181.014]PPNQRGPRDS[166 3     | 0.106  | 0.04     | -0.004   | 1 | 22.49 | 21 | 22  | 1  | 846  | -1.56 |
| 4965.2 | 24 | Q8IX01       | R.K.DCPCPDVPGSPQDI DC[160.0307]PPDPVPGSPQDP: 4   | 0.038  | 0.006    | -0.014   | 1 | 28.28 | 18 | 46  | 4  | 1082 | -2.89 |
| 3494.3 | 12 | Q8IX01       | R.EAELESPEVMEPEE EAELES[166.9984]PEVMEPEE: 3     | 0.443  | 0.018    | -0.006   | 0 | 23.79 | 19 | 50  | 6  | 1082 | -1.63 |
| 4965.2 | 20 | Q8IX01       | R.K.DCPCPDVPGSPQDI DC[160.0307]PPDPVPGSPQDP: 4   | 0.191  | 0.02     | -0.014   | 1 | 22.85 | 18 | 23  | 4  | 1082 | -2.89 |
| 4965.2 | 11 | Q8IX01       | R.K.DCPCPDVPGSPQDI DC[160.0307]PPDPVPGSPQDP: 4   | 0.206  | 0.001    | -0.014   | 1 | 35.48 | 18 | 39  | 4  | 1082 | -2.89 |
| 5045.1 | 22 | Q8IX01       | R.K.DCPCPDVPGSPQDI DC[160.0307]PPDPVPGSPQDP: 4   | -0.11  | 0.012    | -0.014   | 1 | 25.03 | 18 | 25  | 2  | 1082 | -2.89 |
| 5045.1 | 25 | Q8IX01       | R.K.DCPCPDVPGSPQDI DC[160.0307]PPDPVPGSPQDP: 4   | 0.096  | 0.032    | -0.014   | 1 | 20.75 | 18 | 34  | 2  | 1082 | -2.75 |
| 2787.2 | 27 | Q8IXK0       | R.K.LPQQDHTTTTDSEN LPQQDHTTTT[181.014]DSEME: 3   | 0.91   | 0.007    | -0.006   | 0 | 29.46 | 20 | 29  | 3  | 858  | -2.14 |
| 2787.2 | 9  | Q8IXK0       | R.K.LPQQDHTTTTDSEN LPQQDHTTT[181.014]TTDSEME: 3  | 1.093  | 0.004    | -0.006   | 0 | 31.26 | 20 | 31  | 2  | 858  | -2.14 |
| 2787.2 | 11 | Q8IXK0       | R.K.LPQQDHTTTTDSEN LPQQDHTTT[166.9984]EM: 3      | 1.114  | 0.004    | -0.006   | 0 | 31.54 | 20 | 32  | 3  | 858  | -2.14 |
| 1809.9 | 8  | Q8IXM2       | R.K.VYEDSGIPLAEPK VYEDSGIPLAEP[166.9984]PKK 2    | 0.486  | 0.002    | -0.004   | 1 | 36.22 | 21 | 49  | 3  | 172  | -1.93 |
| 2108.9 | 8  | Q8IY81       | R.GPKSDDDGFEIPII GPKS[166.9984]DDDGFEIPIE: 3     | 0.239  | 0.028    | -0.003   | 1 | 23.79 | 21 | 160 | 6  | 847  | -1.67 |
| 2716   | 22 | Q8IY81       | R.K.ALDISLSSGEEDEGE ALDISL[166.9984]S[166.9984 3 | 1.472  | 0.002    | -0.004   | 0 | 35.12 | 20 | 160 | 6  | 847  | -1.67 |
| 1903.8 | 8  | Q8IY81       | R.K.GTEASSGTEAATGLI GTEASS[166.9984]GTEAATGLE: 2 | 1.086  | 4.20E-04 | -0.005   | 0 | 41.22 | 20 | 160 | 6  | 847  | -2.59 |
| 2636.1 | 15 | Q8IY81       | R.K.ALDISLSSGEEDEGE ALDISL[166.9984]S[166.9984 3 | 1.199  | 3.00E-04 | -0.005   | 0 | 43.35 | 21 | 1   |    |      |       |

|        |    |        |                                                         |        |          |           |   |       |    |     |    |      |       |
|--------|----|--------|---------------------------------------------------------|--------|----------|-----------|---|-------|----|-----|----|------|-------|
| 4095   | 30 | Q8IY1T | K.EAAAAAGAAAGAAAT[181.014]GT 4                          | 0.014  | 0.034    | -0.002    | 0 | 18.8  | 17 | 19  | 4  | 594  | -0.59 |
| 3840.7 | 10 | Q8I2L8 | R.EGESPAAGPPQEL EGES[166.9984]PAAGPPQELV 3              | 0.153  | 0.036    | -0.004    | 0 | 21.93 | 20 | 45  | 5  | 1130 | -1.17 |
| 5930.7 | 14 | Q8I2L8 | R.GADTAPTLAEPALP.GADTAP[181.014]LAPEALPSQ 5             | 1.007  | 0.002    | -0.003    | 1 | 27.91 | 14 | 45  | 5  | 1130 | -0.57 |
| 5930.7 | 39 | Q8I2L8 | R.GADTAPTLAEPALP.GADTAPTLAEPALP[166.9984] 5             | 1.756  | 4.40E-04 | -0.003    | 1 | 35.44 | 14 | 55  | 4  | 1130 | -0.57 |
| 3840.7 | 21 | Q8I2L8 | R.EGESPAAGPPQEL EGESPAAGPPQELVEEES[166. 3               | 0.434  | 0.019    | -0.004    | 0 | 24.69 | 20 | 55  | 4  | 1130 | -1.17 |
| 2870.3 | 24 | Q8I2L8 | R.AGSNEDPILAPSGT AGSNEDPILAPSGT[181.014]PPI 3           | 0.42   | 0.02     | -0.005    | 0 | 24.63 | 20 | 50  | 4  | 1130 | -1.78 |
| 1865.8 | 15 | Q8N108 | R.ASPPPPTASNSNSI APS[166.9984]PPPTASNSNSQ 2             | 0.124  | 0.004    | -0.003    | 0 | 32.53 | 21 | 33  | 1  | 512  | -1.8  |
| 3556.5 | 14 | Q8N108 | K.DSSGQDEETSQNSI DSS[166.9984]GQDEETSQNSDI 3            | 0.644  | 0.013    | -0.012    | 1 | 26.78 | 20 | 27  | 2  | 512  | -3.35 |
| 2194.9 | 13 | Q8N163 | R.SVASNQSEMEFSSL S[166.9984]VASNQSEMEFSSLQ 2            | 2.732  | 3.30E-07 | -0.003    | 0 | 73.47 | 21 | 141 | 5  | 923  | -1.32 |
| 3478.6 | 21 | Q8N163 | R.NAETPEATTQQUEDT NAET[181.014]PEATTQQUEDT 3            | 0.471  | 0.016    | -0.01     | 0 | 24.11 | 19 | 141 | 5  | 923  | -2.99 |
| 2194.9 | 18 | Q8N163 | R.SVASNQSEMEFSSL S[166.9984]EMEFSSLQ 3                  | 1.41   | 4.70E-04 | -0.002    | 0 | 41.93 | 21 | 141 | 5  | 923  | -1.09 |
| 3103.3 | 18 | Q8N163 | K.LEDSEVRSVASNQ LEDSEVR[166.9984]VAS[166.5 3            | 1.41   | 0.002    | -0.007    | 1 | 36.22 | 20 | 141 | 5  | 923  | -2.27 |
| 2274.9 | 8  | Q8N163 | R.SVASNQSEMEFSSL SVAS[166.9984]NQ[166.9984 2            | 0.811  | 8.00E-04 | -0.004    | 0 | 38.47 | 20 | 141 | 5  | 923  | -1.9  |
| 2274.9 | 18 | Q8N163 | R.SVASNQSEMEFSSL S[166.9984]VAS[166.9984]NQ 3           | 0.161  | 0.038    | -0.004    | 0 | 21.94 | 20 | 163 | 7  | 923  | -1.59 |
| 3103.3 | 8  | Q8N163 | K.LEDSEVRSVASNQ LEDSEVR[166.9984]NQ[1 3                 | 0.75   | 0.01     | -0.007    | 1 | 27.85 | 20 | 126 | 5  | 923  | -2.27 |
| 2194.9 | 16 | Q8N163 | R.SVASNQSEMEFSSL SVAS[166.9984]NQSEMEFSSLQ 2            | 2.281  | 2.90E-05 | -0.003    | 0 | 54.07 | 21 | 163 | 7  | 923  | -1.32 |
| 3103.3 | 18 | Q8N163 | K.LEDSEVRSVASNQ LEDSEVR[166.9984]VASNQ[1 3              | 0.591  | 0.014    | -0.005    | 1 | 26.31 | 20 | 190 | 7  | 923  | -1.73 |
| 3023.3 | 10 | Q8N163 | K.LEDSEVRSVASNQ LEDSEVR[166.9984]VASNQSEI 3             | 1.92   | 6.10E-04 | -0.003    | 1 | 40.55 | 21 | 240 | 10 | 923  | -1.1  |
| 1736.7 | 8  | Q8N1F8 | R.RASISEPSTDPPEPR RAS[166.9984]SEPSDTPPEPR 3            | 0.201  | 0.034    | -0.004    | 1 | 23.37 | 21 | 23  | 2  | 1099 | -2.17 |
| 1736.7 | 14 | Q8N1F8 | R.RASISEPSTDPPEPR RASISEP[166.9984]DTPPEPR 3            | 0.116  | 0.041    | -0.004    | 1 | 22.49 | 21 | 22  | 2  | 1099 | -2.17 |
| 1736.7 | 13 | Q8N1F8 | R.RASISEPSTDPPEPR RASISEP[181.014]DTPPEPR 3             | 0.214  | 0.033    | -0.004    | 1 | 23.49 | 21 | 23  | 2  | 1099 | -2.17 |
| 2007.8 | 11 | Q8N1G0 | R.SDPDGGDPSLPASC S[166.9984]PLPASC 2                    | -0.193 | 0.009    | -0.005    | 0 | 27.4  | 19 | 27  | 1  | 1237 | -2.46 |
| 2007.8 | 6  | Q8N1G0 | R.SDPDGGDPSLPASC S[166.9984]DPDGGDPSLPASC 2             | -0.833 | 0.039    | -0.005    | 0 | 21.03 | 19 | 21  | 2  | 1237 | -2.46 |
| 3724.6 | 15 | Q8N1G0 | K.ASALGLDGEIEEAP ASALGLDGEIEEAPPSR[166.99 3             | 1.583  | 0.001    | -0.011    | 1 | 36.19 | 20 | 36  | 3  | 1237 | -3.07 |
| 1636.7 | 19 | Q8N1G2 | K.ASTTSLGSDSETEG ASTTSLGSDS[166.9984]ETEGK 2            | -0.327 | 0.012    | -0.006    | 0 | 25.95 | 19 | 26  | 1  | 835  | -3.51 |
| 2853.2 | 22 | Q8N1G4 | K.EEGLSDTEADAVSI EEGSL[166.9984]DTEADAVSGI 3            | 1.41   | 0.001    | -0.005    | 0 | 37.81 | 21 | 38  | 1  | 583  | -1.81 |
| 2853.2 | 11 | Q8N1G4 | K.EEGLSDTEADAVSI EEGS[166.9984]LSDTEADAVSGI 3           | 1.394  | 3.00E-04 | -0.005    | 0 | 43.69 | 21 | 44  | 1  | 583  | -1.81 |
| 1098.6 | 5  | Q8N2M8 | R.KISPPSYAR.R KIS[166.9984]PPSYAR 2                     | -1.003 | 0.048    | -0.002    | 1 | 21.19 | 21 | 21  | 1  | 674  | -2.19 |
| 2279   | 7  | Q8N328 | K.DDSPDEVPSTFTVQ DDS[166.9984]DPEVSTFTVQC 2             | 0.116  | 0.043    | -0.004    | 0 | 22.49 | 21 | 22  | 2  | 593  | -1.88 |
| 1394.7 | 6  | Q8N357 | R.LLGGTRTRPINDAS.L LGGTR[181.014]PINDAS 2               | -0.041 | 0.006    | -0.002    | 1 | 29.85 | 20 | 30  | 1  | 371  | -1.38 |
| 2877.1 | 12 | Q8N3D4 | K.PSDVGNLDDFAESC PSDVGNLDDFAESC[166.9984]DE 3           | 1.903  | 5.80E-04 | -0.007    | 0 | 39.43 | 20 | 67  | 2  | 1523 | -2.5  |
| 2457.1 | 12 | Q8N3D4 | R.ANEAGQGVPEAP ANEAGQGVPEAPRPPET[166. 3                 | 2.455  | 1.60E-04 | -0.006    | 1 | 45.95 | 21 | 67  | 2  | 1523 | -2.4  |
| 2457.1 | 12 | Q8N3D4 | R.ANEAGQGVPEAP ANEAGQGVPEAPRPPET[181.0 3                | 1.868  | 6.40E-04 | -0.006    | 1 | 40.02 | 21 | 60  | 3  | 1523 | -2.4  |
| 3016.2 | 14 | Q8N3E9 | R.ALSDREEDDEEELS[166.9984]REEDDEEELS 3                  | 1.41   | 0.001    | -0.008    | 1 | 36.65 | 20 | 37  | 1  | 789  | -2.55 |
| 3641.5 | 12 | Q8N3V7 | R.SSPGLYTPSGDLSL S[166.9984]SSPGLY[243.0297]TSPGDLSLQ 3 | 1.003  | 0.005    | -0.008    | 0 | 30.43 | 20 | 75  | 8  | 929  | -2.16 |
| 3561.6 | 13 | Q8N3V7 | R.SSPGLYTPSGDLSL S[166.9984]SSPGLYTPSGDLSLQ 3           | 0.309  | 0.026    | -0.01     | 0 | 23.49 | 20 | 75  | 8  | 929  | -2.74 |
| 2266   | 18 | Q8N3V7 | R.DRASPAAAEVEVPE DRAS[166.9984]PAAAEVPEV 3              | 0.632  | 0.011    | -0.003    | 1 | 27.72 | 21 | 75  | 8  | 929  | -1.29 |
| 1783.9 | 9  | Q8N3V7 | K.VASEEVEVPLVYK VAS[166.9984]VEEVEVPLVYK 2              | -0.431 | 0.015    | -0.002    | 0 | 26.05 | 20 | 75  | 8  | 929  | -1.12 |
| 1703.8 | 11 | Q8N3V7 | R.SPPSYLVPSDPK S[166.9984]PPSYLVPSDPK 2                 | 1.723  | 9.10E-05 | -0.003    | 0 | 48.56 | 21 | 143 | 11 | 929  | -1.58 |
| 3561.6 | 15 | Q8N3V7 | R.SSPGLYTPSGDLSL S[166.9984]SSPGLY[243.0297]TSPGDLSLQ 3 | 1.655  | 6.90E-04 | -0.006    | 0 | 39.46 | 20 | 141 | 10 | 929  | -1.72 |
| 3641.5 | 22 | Q8N3V7 | R.SSPGLYTPSGDLSL S[166.9984]SSPGLYTPSGDLSLQ 3           | 0.307  | 0.025    | -0.008    | 0 | 23.42 | 20 | 143 | 11 | 929  | -1.16 |
| 1885   | 15 | Q8N3V7 | R.AASPAPKPSLDLVP AI[166.9984]PAPKPSLDLVPNI 3            | 1.027  | 0.005    | -0.002    | 1 | 28.6  | 18 | 125 | 12 | 929  | -1.07 |
| 3561.6 | 8  | Q8N3V7 | R.SSPGLYTPSGDLSL S[166.9984]PAPKPSLDLVPNI 3             | 1.231  | 0.003    | -0.01     | 0 | 32.66 | 20 | 143 | 11 | 929  | -2.74 |
| 1637.6 | 8  | Q8N3V7 | R.CPSPTMSPSSWK.C [160.0307]P[166.9984]PTM: 2            | 0.091  | 0.004    | -0.002    | 0 | 30.24 | 19 | 143 | 11 | 929  | -1.25 |
| 2087.8 | 19 | Q8N3X1 | K.IDENSDKEMEVEES IDENS[166.9984]DKEMEVEES[1 2           | 1.13   | 4.30E-04 | -0.005    | 1 | 39.69 | 18 | 132 | 8  | 1017 | -1.82 |
| 2087.8 | 19 | Q8N3X1 | K.IDENSDKEMEVEES IDENS[166.9984]DKEMEVEESPI 2           | -0.491 | 0.015    | -0.006    | 1 | 25.45 | 20 | 132 | 8  | 1017 | -1.82 |
| 2581   | 15 | Q8N3X1 | K.ATGGLLCAYADYS ATGGLLCAYADYS[166.9984]LLCAYADYS[1 2    | 1.978  | 4.70E-07 | -0.004    | 0 | 71.24 | 21 | 132 | 8  | 1017 | -1.34 |
| 2980.2 | 12 | Q8N3X1 | R.ALEGGDGSVSSSP ALEGGDGSVSSSP[166.9984]PR: 3            | 0.291  | 0.027    | -0.006    | 1 | 23.31 | 20 | 132 | 8  | 1017 | -1.82 |
| 2968.3 | 11 | Q8N556 | R.TLENSPISCCDSDT TLENSPIS[166.9984]C[160.03 3           | 1.41   | 0.002    | -0.005    | 0 | 36.62 | 22 | 69  | 6  | 730  | -1.82 |
| 2621.1 | 16 | Q8N556 | K.EAYSGCGPVDESC EAYSG[160.0307]SGPVDESC[1 3             | 1.41   | 2.60E-05 | -0.007    | 0 | 53.85 | 21 | 69  | 6  | 730  | -2.75 |
| 2968.3 | 24 | Q8N556 | R.TLENSPISCCDSDT TLENSPIS[160.0307]DTS[166 3            | 1.137  | 0.004    | -0.005    | 0 | 33.73 | 22 | 80  | 6  | 730  | -1.82 |
| 2621.1 | 16 | Q8N556 | K.EAYSGCGPVDESC EAYSG[160.0307]SGPVDESC[1 3             | 1.172  | 7.50E-06 | -0.007    | 0 | 59.29 | 21 | 70  | 5  | 730  | -2.75 |
| 2968.3 | 27 | Q8N556 | R.TLENSPISCCDSDT TLENSPIS[160.0307]DTS[1 3              | 1.452  | 0.003    | -0.005    | 0 | 33.87 | 22 | 122 | 6  | 730  | -1.82 |
| 1329.6 | 7  | Q8N556 | K.SGTSSPQSPVFR.H SGTSSPQ[166.9984]PVFR 2                | -0.775 | 0.031    | -0.002    | 0 | 22.54 | 20 | 122 | 6  | 730  | -1.82 |
| 2968.3 | 32 | Q8N556 | R.TLENSPISCCDSDT TLENSPIS[160.0307]DT[181. 3            | 0.234  | 0.027    | -0.005    | 0 | 24.77 | 22 | 42  | 5  | 730  | -1.49 |
| 1329.6 | 7  | Q8N556 | K.SGTSSPQSPVFR.H SGTSS[166.9984]PQSPVFR 2               | -0.751 | 0.029    | -0.002    | 0 | 22.85 | 20 | 83  | 5  | 730  | -1.49 |
| 1279.6 | 13 | Q8N565 | K.ELHYLPPFP.S ELHYLPPFS[166.9984]P 2                    | 0.196  | 0.003    | -9.00E-04 | 0 | 32.22 | 20 | 32  | 1  | 214  | -0.74 |
| 1632.8 | 9  | Q8N5F7 | R.IGELGAPEVWGLSP I[166.9984]PEVWGLS[166.9984]PK 2       | -0.54  | 0.017    | -0.002    | 0 | 25.93 | 21 | 26  | 2  | 245  | -1.03 |
| 2594   | 13 | Q8N5P1 | K.DYDVSNDNDICQEQ DYDVS[166.9984]DNDI[C160. 2            | 1.982  | 2.20E-08 | -0.004    | 0 | 82.01 | 18 | 82  | 1  | 911  | -1.72 |
| 1193.6 | 6  | Q8N5Y2 | R.SSSPILPTPSK.E SSS[166.9984]PILPTPSK 2                 | -0.555 | 0.018    | -0.002    | 0 | 24.81 | 20 | 25  | 1  | 521  | -1.87 |
| 3494.4 | 18 | Q8N655 | K.ESSFTDENPSETEE ESSTFTDENPSETEE[166.9984]ETEESI 3      | 2.572  | 1.80E-06 | -0.014    | 1 | 64.57 | 20 | 65  | 2  | 1247 | -4    |
| 3494.4 | 8  | Q8N655 | K.ESSFTDENPSETEE ESSTFTDENPSETEE[181.014]EES 3          | 0.484  | 0.016    | -0.014    | 1 | 25.24 | 20 | 25  | 2  | 1247 | -4    |
| 2299   | 12 | Q8N684 | R.DSSDADGRATPSE DSSDADGRAT[181.014]PSENL 3              | 0.405  | 0.02     | -0.006    | 1 | 25.41 | 21 | 25  | 2  | 471  | -2.47 |
| 1783.8 | 6  | Q8N6N3 | R.LPEGETLESDEK LPEGETLES[166.9984]DDEK 2                | 0.392  | 0.002    | -0.004    | 0 | 34.28 | 20 | 34  | 2  | 182  | -2.23 |
| 1866.7 | 11 | Q8N6T3 | K.SPSSDWTCDTST S[166.9984]PSSDWTCDT[160.03 2            | 1.985  | 7.10E-06 | -0.004    | 0 | 55.88 | 17 | 56  | 1  | 406  | -2.03 |
| 1434.9 | 6  | Q8N7R7 | R.SFSADNFQIQR.S SFS[166.9984]ADNFQIQR 2                 | 2.799  | 8.10E-06 | -0.002    | 0 | 59.25 | 21 | 59  | 1  | 359  | -1.12 |
| 1731.8 | 9  | Q8N8A6 | R.RVNDAPGPEAPC RVNDAPG[166.9984]PEAPQC 2                | -0.062 | 0.006    | -0.003    | 1 | 30.74 | 21 | 75  | 4  | 666  | -1.93 |
| 4080.6 | 47 | Q8N8A6 | K.ADGEDAGAESNEE ADGEDAGAES[166.9984]NEEAF 4             | 0.038  | 0.007    | -0.009    | 0 | 27.28 | 18 | 75  | 4  | 666  | -2.11 |
| 1575.7 | 16 | Q8N8A6 | R.VNDAPGPEAPC RVNDAPG[166.9984]PEAPQGI 2                | 2      | 4.90E-05 | -0.003    | 0 | 51.36 | 21 | 75  | 4  | 666  | -1.8  |
| 2688.2 | 20 | Q8N9B5 | K.GAASPVLQEDHC GAAS[166.9984]PVLQEDHC[16 3              | 0.478  | 0.015    | -0.005    | 0 | 26.13 | 21 | 26  | 1  | 908  | -1.88 |
| 2320   | 13 | Q8N9T8 | R.AFVDEDEDEGAGI AFVDE[166.9984]EDEDGAGEC 3              | 2.572  | 3.00E-06 | -0.004    | 0 | 63.11 | 20 | 199 | 9  | 799  | -1.82 |
| 1831.7 | 7  | Q8N9T8 | K.VYDEENSDEGTSNH VYDEENS[166.9984]DGETSNHR 3            | -0.014 | 0.047    | -0.002    | 0 | 19.26 | 19 | 199 | 9  | 799  | -0.95 |
| 3071.3 | 17 | Q8N9T8 | R.QLPALDGLMGPES QLPA[166.9984]DGLMGPES[166.9984]P 3     | 1.807  | 8.20E-04 | -0.005    | 0 | 39.47 | 21 | 199 | 9  | 799  | -1.8  |
| 2991.4 | 20 | Q8N9T8 | R.QLPALDGLMGPES QLPA[166.9984]DGLMGPES[166.9984]P 3     | 0.033  | 0.043    | -0.007    | 0 | 21.76 | 21 | 225 | 7  | 709  | -2.44 |
| 1588.7 | 13 | Q8N9U9 | R.GHPAGSGGVVENG GHPAGS[166.9984]GGVVENG 3               | 0.042  | 0.049    | -0.007    | 0 | 20.77 | 20 | 21  | 1  | 471  | -4.71 |
| 2832   | 16 | Q8NAV1 | R.VSALEEDMDDVES VSALEEDMDDVES[166.9984]S 3              | 0.017  | 0.047    | -0.005    | 0 | 17.52 | 17 | 18  | 1  | 312  | -1.76 |
| 3230.2 | 17 | Q8NAV1 | R.VSALEEDMDDVES VSALEEDMDDVES[166.9984]S 3              | 1.544  | 2.50E-05 | -0.008    | 1 | 51.84 | 18 | 56  | 2  | 312  | -2.52 |
| 2354   | 7  | Q8NB49 | K.GVTQEVLDGSLQTDI GVTQEVLDGSLQTT[181.014]DGTI 2         | 0.537  | 0.002    | -0.008    | 0 | 33.75 | 20 | 36  | 4  | 1132 | -3.39 |
| 2354   | 9  | Q8NB49 | K.GVTQEVLDGSLQTDI GVTQEVLDGSLQTT[166.9984]QTDG 2        | 0.276  | 0.003    | -0.008    | 0 | 35.05 | 20 | 33  | 2  | 1132 | -3.39 |
| 1742.7 | 9  | Q8NC44 | R.QALDSEEEEDVAA QALDS[166.9984]EEEEEVAAK 2              | 1.978  | 4.20E-05 | -0.005    | 0 | 51.16 | 20 | 80  | 5  | 543  | -2.62 |
| 3301.4 | 22 | Q8NC44 | K.NAPPGGDEPLAETE NAPPGGDEPLAETE[181.014]EJ 3            | 0.416  | 0.02     | -0.003    | 0 | 24.56 | 20 | 80  | 5  | 543  | -0.83 |
| 3301.4 | 17 | Q8NC44 | K.NAPPGGDEPLAETE NAPPGGDEPLAETES[166.9984] 3            | 0.547  | 0.015</  |           |   |       |    |     |    |      |       |

|         |    |            |                                              |   |        |          |           |   |       |    |     |    |      |       |
|---------|----|------------|----------------------------------------------|---|--------|----------|-----------|---|-------|----|-----|----|------|-------|
| 1829.8  | 5  | Q8NEB7     | K.FHSESLSSNPSSFAP FHSE[166.9984]SSNPSSFAPR   | 2 | -0.756 | 0.029    | -0.005    | 0 | 23.83 | 21 | 24  | 1  | 543  | -2.95 |
| 1370.5  | 5  | Q8NEF9     | K.EYFDDSTEER.F EYFDD[181.014]EER             | 2 | -0.286 | 0.011    | -0.003    | 0 | 22.5  | 15 | 22  | 2  | 429  | -2.17 |
| 2378.9  | 13 | Q8NEJ9     | K.LSSEDEEEDAEADD LSS[166.9984]EEDDEEAEDDQ    | 2 | 1.978  | 7.80E-09 | -0.007    | 0 | 84.96 | 16 | 85  | 2  | 315  | -2.76 |
| 2506.9  | 12 | Q8NEJ9     | K.LSSEDEEEDAEADD LSS[166.9984]EEDDEEAEDDQ    | 3 | 0.62   | 0.011    | -0.003    | 1 | 24.55 | 18 | 196 | 5  | 315  | -1.12 |
| 2378.9  | 13 | Q8NEJ9     | K.LSSEDEEEDAEADD LSS[166.9984]EEDDEEAEDDQ    | 2 | 2.14   | 1.10E-07 | -0.007    | 0 | 73.34 | 16 | 196 | 5  | 315  | -2.76 |
| 2506.9  | 20 | Q8NEJ9     | K.LSSEDEEEDAEADD LSS[166.9984]EEDDEEAEDDQ    | 2 | 0.68   | 9.80E-04 | -0.003    | 1 | 35.16 | 18 | 73  | 2  | 315  | -1.32 |
| 1918.7  | 7  | Q8NEM2     | K.GLFQDEEDSCSDSY GLFQDEED[160.0307]S[166.9   | 2 | 1.129  | 3.90E-04 | -0.004    | 0 | 38.58 | 17 | 39  | 2  | 672  | -2.16 |
| 1918.7  | 8  | Q8NEM2     | K.GLFQDEEDSCSDSY GLFQDEED[160.0307]S[166.9   | 2 | 1.703  | 1.00E-04 | -0.004    | 0 | 44.29 | 17 | 44  | 1  | 672  | -2.16 |
| 2589.9  | 6  | Q8NEN9     | K.HPTNTSDNEGSDTE HT[181.014]PNT[181.014]SDNI | 3 | 0.267  | 0.028    | -0.002    | 0 | 21.02 | 18 | 21  | 5  | 1154 | -0.87 |
| 4119.6  | 28 | Q8NEN9     | R.LESEPTDLVEPSPK R.LESEPTDLVEPSPKHT[181.0    | 4 | 0.246  | 0.002    | -0.01     | 1 | 31.01 | 17 | 50  | 5  | 1154 | -2.53 |
| 1704.7  | 7  | Q8NEN9     | R.ELDFEFEDLASDVR. ELDS[166.9984]EFEDLASDVR   | 2 | 0.755  | 9.70E-04 | -0.001    | 0 | 37.86 | 20 | 50  | 5  | 1154 | -0.76 |
| 1504.7  | 4  | Q8NEY8     | R.DNTFFRESVGR.K DNTFFRES[166.9984]PVGR       | 2 | -0.738 | 0.028    | -0.003    | 1 | 23.91 | 21 | 24  | 2  | 458  | -1.95 |
| 938.46  | 5  | Q8NFC6     | K.DVTLSPVK.A DVTL[166.9984]PVK               | 1 | -0.051 | 0.006    | -0.002    | 0 | 30.88 | 21 | 31  | 11 | 3051 | -1.86 |
| 2568    | 8  | Q8NFC6     | K.DEYSSSETTGEKPEC DEYS[166.9984]SETTGEKPEQ   | 3 | 0.074  | 0.047    | -0.008    | 1 | 21.07 | 20 | 51  | 14 | 3051 | -2.99 |
| 1181.6  | 6  | Q8NFC6     | K.DKDVTLSPVK.A DKDVTL[166.9984]PVK           | 2 | -0.697 | 0.027    | -0.002    | 1 | 23.29 | 20 | 51  | 14 | 3051 | -2.07 |
| 2762    | 19 | Q8NFC6     | K.KEQESDEEEEEEKEQES[166.9984]DEEEEEEDEE      | 3 | 0.843  | 0.008    | -0.009    | 1 | 23.76 | 15 | 51  | 14 | 3051 | -3.34 |
| 1879.7  | 16 | Q8NFC6     | K.YYSDSDDELTVGR.YY[243.0297]SDS[166.9984]DC  | 2 | 0.989  | 5.70E-04 | -0.004    | 0 | 36.15 | 16 | 51  | 14 | 3051 | -2.16 |
| 953.47  | 6  | Q8NFC6     | K.TQLSPSIK.R TQLS[166.9984]PSIK              | 2 | -0.924 | 0.044    | -0.002    | 0 | 22.05 | 21 | 22  | 9  | 3051 | -2.12 |
| 1136.5  | 6  | Q8NFJ5     | R.AHAWPSPYK.D AHAWP[166.9984]PYK             | 2 | -0.617 | 0.022    | -0.002    | 0 | 23.19 | 19 | 23  | 1  | 357  | -1.89 |
| 3706.6  | 11 | Q8NH9H     | R.TSDPSAAVNHVST TSDPSAAVNHVSTTS[166.9984     | 3 | 1.41   | 3.80E-04 | -0.01     | 0 | 39.24 | 18 | 39  | 4  | 583  | -2.77 |
| 3706.6  | 23 | Q8NH9H     | R.TSDPSAAVNHVST TSDPSAAVNHVSTTS[166.9984     | 3 | 1.544  | 3.90E-04 | -0.01     | 0 | 39.17 | 18 | 39  | 2  | 583  | -2.77 |
| 3862.7  | 25 | Q8NH9H     | R.RTSDPSAAVNHVST RTS[166.9984]DPSAAVNHVST    | 3 | 1.559  | 6.60E-04 | -0.008    | 1 | 38.13 | 19 | 60  | 3  | 583  | -2.09 |
| 2578.2  | 19 | Q8NHMS     | R.APKPPTDGSPTS' APKPPTDGSPTS[166.9984]PTST   | 3 | 0.341  | 0.025    | -0.007    | 1 | 24.81 | 21 | 26  | 8  | 1336 | -2.6  |
| 1531.6  | 5  | Q8NHQ9     | K.TVDLGLSLEDDC.- TVDLGLS[166.9984]DLEDDC[16  | 2 | -0.357 | 0.013    | -0.002    | 0 | 25.79 | 19 | 26  | 2  | 600  | -1.16 |
| 2318.9  | 11 | Q8NHQ9     | R.EEGSDIEDEDMEEL EEGS[166.9984]DIEDEDMEEL    | 3 | 0.047  | 0.048    | -0.003    | 0 | 19.83 | 19 | 32  | 2  | 600  | -1.23 |
| 2342.9  | 10 | Q8NHWS,POS | K.VEAKEESESEDEDM VEAKEES[166.9984]EESDEDMG   | 2 | 1.978  | 1.60E-05 | -0.005    | 1 | 54.65 | 19 | 55  | 5  | 1593 | -2.21 |
| 2342.9  | 12 | Q8NHWS,POS | K.VEAKEESESEDEDM VEAKEES[166.9984]DDEDMG     | 2 | 1.679  | 1.20E-04 | -0.005    | 1 | 46.15 | 19 | 46  | 1  | 1593 | -2.21 |
| 1603.6  | 11 | Q8NI27     | K.SESPSPYNEK.D SES[166.9984]PC[160.0307]ESI  | 2 | -0.346 | 0.012    | -0.003    | 0 | 25.9  | 19 | 27  | 4  | 1593 | -1.66 |
| 1572.7  | 11 | Q8NI27     | K.IDTHPSHSSTVK.D IDTHPS[166.9984]PSHSSTVK    | 3 | 0.127  | 0.042    | -0.003    | 0 | 21.7  | 20 | 31  | 2  | 1593 | -1.71 |
| 2251.8  | 19 | Q8NI35     | K.ALTDSDENEDEA ALTDSD[166.9984]DENEEDAF      | 2 | 1.978  | 2.10E-07 | -0.005    | 0 | 72.49 | 18 | 92  | 3  | 1801 | -2.26 |
| 1207.5  | 8  | Q8NI35     | K.VPDSPENELK.S VPDS[166.9984]PENELK          | 2 | 0.653  | 0.001    | -0.003    | 0 | 35.84 | 19 | 85  | 4  | 1801 | -2.82 |
| 1628.7  | 6  | Q8NI35     | R.RLFDEASVDEPR.F RLFDEAS[166.9984]VDEPR      | 2 | 0.192  | 0.003    | -0.004    | 1 | 33.25 | 21 | 105 | 6  | 1801 | -2.33 |
| 3500.5  | 25 | Q8TAA9     | R.TEEVQDDNWGETT TEEVQDDNWGETT[166.9984]T     | 3 | 1.655  | 1.00E-05 | -0.009    | 0 | 56.91 | 20 | 57  | 1  | 524  | -2.66 |
| 1991.14 | 14 | Q8TAD8     | R.RPDHSGGSPPTTS RPDHS[166.9984]GGSP[166.9    | 3 | 0.135  | 0.036    | -0.004    | 1 | 21.78 | 20 | 26  | 6  | 396  | -1.76 |
| 1666.8  | 14 | Q8TAD8     | K.QERLSPVAPPAPHR QERLS[166.9984]PEVAPPAPHR   | 3 | 0.523  | 0.015    | -0.004    | 1 | 26.58 | 21 | 27  | 3  | 396  | -2.2  |
| 2075.9  | 17 | Q8TAQ2     | K.DMDEPSPVNVNE' DMDEPS[166.9984]PVPNVNEV     | 3 | 0.04   | 0.044    | -0.003    | 0 | 21.8  | 21 | 71  | 4  | 1214 | -1.43 |
| 1684.7  | 9  | Q8TAQ2     | K.TLTDVENSPPDRR TLTDVENS[166.9984]PDSDRR     | 3 | 0.342  | 0.025    | -0.003    | 1 | 23.85 | 20 | 53  | 3  | 1214 | -1.95 |
| 1232.6  | 6  | Q8TB61     | K.AVVPVSPVQV.- AVVPVES[166.9984]PVQV         | 2 | 0.696  | 0.001    | -0.002    | 1 | 37.32 | 20 | 37  | 2  | 432  | -2.02 |
| 1457.6  | 8  | Q8TB72     | K.GKASPFEEQDNR.D GKAS[166.9984]PFEEQDNR      | 2 | -0.091 | 0.006    | -0.003    | 1 | 29.45 | 20 | 29  | 5  | 1066 | -2.25 |
| 1195.6  | 6  | Q8TB72     | R.QASPTVEVVER.L QAS[166.9984]PTEVVER         | 2 | -0.245 | 0.01     | -0.002    | 0 | 25.88 | 18 | 30  | 3  | 1066 | -1.88 |
| 1773.8  | 7  | Q8TB72     | R.TPGSRQASPTVEV TPGS[166.9984]RQAS[166.998   | 2 | 0.04   | 0.004    | -0.003    | 1 | 31.71 | 21 | 63  | 4  | 1066 | -1.59 |
| 3522.5  | 20 | Q8TB85     | K.QVLTAPSGAGQPR.QVLTAPSGAGQPR[166.9984]E     | 3 | 1.758  | 9.10E-04 | -0.009    | 1 | 37.98 | 20 | 38  | 3  | 520  | -2.44 |
| 1528.7  | 8  | Q8TBET     | K.QDYQEILDSPIK.- QDYQEILDS[166.9984]PIK      | 2 | -0.603 | 0.019    | -0.003    | 0 | 26.28 | 22 | 26  | 1  | 412  | -1.67 |
| 1754.7  | 8  | Q8TC07     | R.NDSPTQI[166.9984]NDS[166.9984]PTQI[166.998 | 2 | -0.02  | 0.005    | -0.004    | 0 | 31.16 | 21 | 31  | 2  | 691  | -2.4  |
| 1735.6  | 9  | Q8TC12     | R.ENPPVEDSDEDDK ENPPVEDS[166.9984]S[166.99   | 2 | 0.235  | 0.003    | -0.002    | 0 | 25.71 | 13 | 128 | 7  | 826  | -1.39 |
| 1811.7  | 8  | Q8TC12     | R.ENPPVEDSDEDDK ENPPVEDS[166.9984]DDEDDK     | 2 | -0.715 | 0.029    | -0.002    | 1 | 21.21 | 18 | 128 | 7  | 826  | -1.1  |
| 1811.7  | 13 | Q8TC12     | R.ENPPVEDSDEDDK ENPPVEDS[166.9984]DDEDDK     | 2 | 1.978  | 2.10E-05 | -0.002    | 1 | 52.57 | 18 | 128 | 7  | 826  | -1.1  |
| 1891.7  | 8  | Q8TC12     | R.ENPPVEDSDEDDK ENPPVEDS[166.9984]S[166.99   | 2 | -0.849 | 0.034    | -0.003    | 1 | 17.87 | 16 | 128 | 7  | 826  | -1.6  |
| 1655.6  | 12 | Q8TC12     | R.ENPPVEDSDEDDK ENPPVEDS[166.9984]DDEDDK     | 2 | 2.085  | 8.60E-08 | -0.002    | 0 | 75.13 | 17 | 91  | 6  | 826  | -1.45 |
| 2911.3  | 21 | Q8TC77     | K.DSATPLSPQPPSEF DSATPLSPQPPSEFATSPPWPAEC    | 3 | 0.065  | 0.049    | -6.00E-04 | 0 | 20.98 | 20 | 21  | 1  | 592  | -0.21 |
| 1755.6  | 16 | Q8TD86     | K.EGHETPMDISDD.EGHETPMDIS[166.9984]DSD       | 2 | -0.471 | 0.015    | -0.002    | 0 | 23.62 | 18 | 24  | 3  | 740  | -3.94 |
| 1659.6  | 11 | Q8TDD1     | K.IDDRDSDEEGASDR IDDRDS[166.9984]DEEGASDR    | 2 | 1.978  | 1.20E-05 | -0.001    | 1 | 54.05 | 17 | 120 | 5  | 881  | -0.65 |
| 2709.2  | 9  | Q8TDD1     | K.LGPGRPLPTFTTSEC LGPGRPLPTFTTSEC[166.9984   | 3 | 1.002  | 0.005    | -0.006    | 1 | 31.42 | 21 | 120 | 5  | 881  | -2.18 |
| 2228.9  | 6  | Q8TDD1     | R.PLPTFTTSECTSDVE PLPTFTTSEC[160.0307]TS[166 | 2 | 0.145  | 0.003    | -0.005    | 0 | 32.81 | 21 | 120 | 5  | 881  | -2.26 |
| 2228.9  | 15 | Q8TDD1     | R.PLPTFTTSECTSDVE PLPTFTTSEC[160.0307]TS[166 | 2 | 1.132  | 3.50E-04 | -0.005    | 0 | 42.58 | 21 | 128 | 6  | 881  | -2.26 |
| 2709.2  | 9  | Q8TDD1     | K.LGPGRPLPTFTTSEC LGPGRPLPTFTTSEC[160.0307]T | 3 | 1.388  | 0.002    | -0.006    | 1 | 35.23 | 21 | 132 | 5  | 881  | -2.18 |
| 2709.2  | 29 | Q8TDD1     | K.LGPGRPLPTFTTSEC LGPGRPLPTFTTSEC[160.0307]T | 3 | 0.524  | 0.016    | -0.006    | 1 | 26.27 | 21 | 102 | 5  | 881  | -2.18 |
| 2901.2  | 12 | Q8TDM6     | K.CVPASGELSPELQE C[160.0307]VPASGELS[166.998 | 3 | 1.544  | 1.30E-04 | -0.005    | 0 | 45.98 | 20 | 46  | 1  | 1919 | -1.7  |
| 2901.2  | 12 | Q8TDM6     | K.CVPASGELSPELQE C[160.0307]VPASGELS[166.998 | 3 | 1.961  | 5.20E-04 | -0.005    | 0 | 39.96 | 20 | 40  | 4  | 1919 | -1.7  |
| 2901.2  | 12 | Q8TDM6     | K.CVPASGELSPELQE C[160.0307]VPASGELS[166.998 | 3 | 0.878  | 0.006    | -0.005    | 0 | 29.12 | 20 | 48  | 3  | 1919 | -1.7  |
| 1178.9  | 9  | Q8TDM6     | R.VGPCSPAPPAAR.D VGPC[160.0307]S[166.9984]P  | 2 | 0.076  | 0.004    | -0.002    | 0 | 31.2  | 20 | 31  | 3  | 1919 | -1.51 |
| 1471.6  | 11 | Q8TDM6     | R.NLLQSWEDM.K NLLQSW[166.9984]WEDM           | 2 | 0.537  | 0.001    | -0.002    | 0 | 36.59 | 21 | 48  | 3  | 1919 | -1.14 |
| 2552.1  | 22 | Q8TE77     | K.APSEELHGDQDFT APSEELHGDQDFT[166.9984]G     | 2 | 0.711  | 0.009    | -0.007    | 0 | 26.51 | 19 | 27  | 1  | 619  | -2.66 |
| 1644.6  | 9  | Q8TEA8     | R.SASSGAEGDSSER SASS[166.9984]GAEGDSSEREI    | 2 | 1.978  | 3.70E-05 | -0.003    | 1 | 51.08 | 19 | 51  | 1  | 209  | -1.56 |
| 1753.7  | 18 | Q8TEK3     | K.VAGPADAPMDSG.VAGPADAPMDS[166.9984]GAE      | 2 | -0.1   | 0.007    | -0.005    | 0 | 28.36 | 19 | 28  | 3  | 1739 | -3.39 |
| 1468.7  | 6  | Q8TEK3     | R.ARSTSPVLPQR.D ARST[181.014]PS[166.9984]PV  | 2 | -0.958 | 0.045    | -0.003    | 1 | 21.68 | 21 | 37  | 5  | 1739 | -1.84 |
| 1203.5  | 5  | Q8TEM1     | R.DLAVPAALTR.A DLAVPAAL[181.014]PR           | 2 | -0.054 | 0.007    | -0.002    | 0 | 28.77 | 19 | 29  | 2  | 1887 | -1.66 |
| 1410.6  | 7  | Q8TER5     | R.GSPPTDAEGSPGLSR GSPPTDAEGS[166.9984]PGLSR  | 2 | 0.603  | 0.001    | -0.003    | 0 | 36.39 | 20 | 36  | 1  | 1519 | -2.11 |
| 2027.9  | 21 | Q8TEW0     | K.SPGSPGPELPIETA SPGS[166.9984]PGPELPIETALI  | 2 | -0.803 | 0.033    | -0.003    | 0 | 22.26 | 20 | 22  | 6  | 1356 | -1.64 |
| 2027.9  | 13 | Q8TEW0     | K.SPGSPGPELPIETA S[166.9984]PGSPGPELPIETALI  | 2 | 1.458  | 1.80E-04 | -0.003    | 0 | 44.8  | 20 | 45  | 4  | 1356 | -1.64 |
| 2483    | 15 | Q8TF01     | R.SKFDSDEEEDTEN' SKFDS[166.9984]DEEEDTENVI   | 2 | 0.825  | 0.008    | -0.004    | 1 | 27.61 | 19 | 28  | 3  | 805  | -1.48 |
| 2995    | 27 | Q8WU17     | R.EAAAESDRELNEDD EAAAES[166.9984]DRELNEDD    | 3 | 0.253  | 0.027    | -0.007    | 1 | 18.88 | 16 | 44  | 3  | 664  | -2.51 |
| 2835.1  | 15 | Q8WU17     | R.EAAAESDRELNEDD EAAAES[166.9984]DRELNEDD    | 3 | 0.016  | 0.045    | -0.008    | 1 | 19.59 | 19 | 23  | 2  | 664  | -2.81 |
| 2083.8  | 23 | Q8WU17     | R.NGVQHTGAAAEF NGVQHTGAAAEFNDD[181.014]      | 2 | 0.991  | 5.20E-04 | -0.01     | 0 | 40.24 | 20 | 44  | 3  | 664  | -2.87 |
| 1794.7  | 15 | Q8WUM9     | R.EIKCSPSEPLMEK.I EIKC[160.0307]S[166.9984]P | 2 | -0.591 | 0.019    | -0.004    | 1 | 23.31 | 19 | 23  | 2  | 679  | -4.25 |
| 3419.5  | 27 | Q8WUZ0     | K.GTEPSPGGTQPSPR GT[181.014]EPSPGGTQPSPRV    | 3 | 2.526  | 1.60E-04 | -0.008    | 1 | 45.66 | 20 | 74  | 3  | 217  | -2.42 |
| 3419.5  | 17 | Q8WUZ0     | K.GTEPSPGGTQPSPR GT[181.014]EPSPGGTQPSPRV    | 3 | 0.153  | 0.028    | -0.008    | 1 | 23.22 | 20 | 74  | 3  | 217  | -2.42 |
| 3499.5  | 26 | Q8WUZ0     | K.GTEPSPGGTQPSPR GT[181.014]EPSPGGTQPSPRV    | 3 | 1.538  | 0.002    | -0.009    | 1 | 35.74 | 20 | 66  | 5  | 217  | -2.51 |
| 3419.5  | 22 | Q8WUZ0     | K.GTEPSPGGTQPSPR GT[181.014]EPSPGGTQPSPRV    | 3 | 1.993  | 5.50E-04 | -0.008    | 1 | 40.28 | 20 | 57  | 3  | 217  | -2.42 |
| 3499.5  | 17 | Q8WUZ0     | K.GTEPSPGGTQPSPR GT[181.014]EPSPGGTQPSPRV    | 3 | 0.614  | 0.013    | -0.009    | 1 | 26.57 | 20 | 57  | 3  | 217  | -2.51 |
|         |    |            |                                              |   |        |          |           |   |       |    |     |    |      |       |

|        |    |        |                    |                              |   |        |          |           |   |       |    |     |    |      |       |
|--------|----|--------|--------------------|------------------------------|---|--------|----------|-----------|---|-------|----|-----|----|------|-------|
| 1508.6 | 8  | Q8WW11 | R.HSPSPASQSGSQLR   | S[166.9984]HSPSPASQSGSQLR    | 3 | 0.781  | 0.009    | -0.001    | 0 | 29.16 | 21 | 204 | 10 | 1683 | -0.93 |
| 1037.5 | 4  | Q8WW11 | R.ISINQTPGK.S      | ISINQ[181.014]PGK            | 2 | -0.823 | 0.032    | -9.00E-04 | 0 | 22.16 | 20 | 159 | 11 | 1683 | -0.85 |
| 1696.7 | 9  | Q8WW11 | K.SRSTTELDYDSTNK.I | SRST[181.014]ELDDYSTNK       | 3 | 0.658  | 0.011    | -0.004    | 1 | 27.94 | 21 | 289 | 15 | 1683 | -2.44 |
| 1912.9 | 12 | Q8WW11 | K.EVDGLLTPSPGMS    | EVDGLLTPSPGMS[166.9984]PV    | 2 | 1.753  | 8.70E-05 | -0.004    | 0 | 48.89 | 21 | 107 | 6  | 1075 | -1.85 |
| 1827.8 | 19 | Q8WW11 | K.GPPSPVFEVYNNP    | GPPSPVFEVYNNP[166.9984]PV    | 3 | 0.506  | 0.014    | -0.003    | 0 | 27.46 | 22 | 107 | 6  | 1075 | -1.67 |
| 3598.7 | 14 | Q8WW11 | K.EDKPPPLASGGTEG   | EDKPPPLASGGTEGPEQPPPPC1      | 3 | 1.41   | 1.30E-04 | -0.008    | 1 | 45.43 | 19 | 107 | 6  | 1075 | -2.23 |
| 3598.7 | 42 | Q8WW11 | K.EDKPPPLASGGTEG   | EDKPPPLASGGTEGPEQPPPPC1      | 3 | 1.461  | 0.002    | -0.008    | 1 | 33.97 | 19 | 120 | 6  | 1075 | -2.23 |
| 3598.7 | 25 | Q8WW11 | K.EDKPPPLASGGTEG   | EDKPPPLASGGTEGPEQPPPPC1      | 4 | 0.206  | 0.013    | -0.006    | 1 | 25.65 | 19 | 123 | 5  | 1075 | -1.67 |
| 1812.7 | 11 | Q8WW11 | R.TAFYNNEDDEEQR    | TAFYNNEDS[166.9984]EEQR      | 2 | 2.241  | 6.60E-06 | -0.005    | 0 | 58.15 | 19 | 64  | 7  | 1821 | -2.8  |
| 1289.6 | 12 | Q8WW11 | R.AQSYDIQAWK.K     | AQSY[166.9984]YDIQAWK        | 2 | -0.355 | 0.011    | -0.001    | 0 | 27.78 | 21 | 28  | 1  | 1821 | -0.83 |
| 1438.5 | 7  | Q8WW11 | K.KVLSDSEDEEK.D    | KVLS[166.9984]DS[166.9984]E  | 2 | -0.353 | 0.012    | -0.003    | 1 | 23.69 | 17 | 64  | 7  | 1821 | -1.8  |
| 1270.6 | 13 | Q8WX93 | R.IASDEIQGK.D      | IAS[166.9984]DEIQGK          | 2 | -0.73  | 0.027    | -0.002    | 0 | 23.06 | 20 | 23  | 1  | 1383 | -1.83 |
| 1426.6 | 7  | Q8WXH0 | R.QQSVESLAEV.K     | QQS[166.9984]VESLAEV         | 2 | -0.544 | 0.018    | -0.002    | 0 | 25.92 | 21 | 54  | 9  | 6885 | -1.61 |
| 1602.6 | 6  | Q8WXH0 | K.EASENETDMEDPR    | EAS[166.9984]ENETDMEDPR      | 2 | 0.441  | 0.002    | -0.003    | 0 | 30.77 | 16 | 54  | 9  | 6885 | -1.81 |
| 2618   | 6  | Q8WXH0 | K.EASENETDMEDPR    | EAS[166.9984]ENETDMEDPREI    | 3 | 0.713  | 0.01     | -0.004    | 1 | 26.53 | 19 | 54  | 9  | 6885 | -1.64 |
| 2933.2 | 16 | Q8WXH0 | R.LTSCPTGLEDEKAS   | LTS[160.0307]TPGLEDEKAS[     | 3 | 0.576  | 0.014    | -0.004    | 1 | 26.12 | 20 | 48  | 7  | 6885 | -1.29 |
| 2464.1 | 11 | Q8WX19 | R.GRLTSPDIHVLSDN   | GRLT[181.014]PS[166.9984]PD  | 3 | 0.686  | 0.011    | -0.006    | 1 | 27.26 | 20 | 27  | 2  | 593  | -2.25 |
| 2464.1 | 11 | Q8WX19 | R.GRLTSPDIHVLSDN   | GRLT[181.014]PSDPIHVL[166.9  | 3 | 0.79   | 0.008    | -0.006    | 1 | 28.26 | 20 | 59  | 3  | 593  | -2.25 |
| 2544   | 14 | Q8WX19 | R.GRLTSPDIHVLSDN   | GRLT[181.014]PS[166.9984]PD  | 3 | 0.523  | 0.014    | -0.007    | 1 | 25.59 | 20 | 59  | 3  | 593  | -2.74 |
| 2464.1 | 17 | Q8WX19 | R.GRLTSPDIHVLSDN   | GRLT[181.014]PS[166.9984]PD  | 3 | 1.098  | 0.004    | -0.002    | 1 | 31.31 | 20 | 86  | 5  | 593  | -0.95 |
| 2384.1 | 18 | Q8WX19 | R.GRLTSPDIHVLSDN   | GRLT[181.014]PSDPIHVLSDNEA   | 3 | 0.383  | 0.022    | -0.003    | 1 | 24.18 | 20 | 95  | 6  | 593  | -1.4  |
| 2171   | 9  | Q8WX19 | R.LTSPDIHVLSDNEA   | LTPSDPIHVL[166.9984]DNEAS    | 2 | -0.224 | 0.009    | -0.004    | 0 | 29.15 | 21 | 62  | 3  | 593  | -1.96 |
| 2464.1 | 17 | Q8WX19 | R.GRLTSPDIHVLSDN   | GRLT[181.014]PSDPIHVL[166.9  | 3 | 1.024  | 0.005    | -0.006    | 1 | 30.58 | 20 | 64  | 4  | 593  | -2.25 |
| 2464.1 | 25 | Q8WX19 | R.GRLTSPDIHVLSDN   | GRLT[166.9984]DPIHVL[166.9   | 3 | 0.603  | 0.013    | -0.006    | 1 | 26.43 | 20 | 72  | 4  | 593  | -2.25 |
| 1581.6 | 9  | Q8WYH8 | K.DKMEGSDFFSSGGI   | DKMEGS[166.9984]DFSSGGR      | 2 | 0.716  | 9.50E-04 | -0.004    | 1 | 35.47 | 18 | 35  | 1  | 240  | -2.2  |
| 2294.1 | 11 | Q8WYK2 | R.TDSVKTPESEGNPLI  | TDS[166.9984]VKTPESEGNPLI    | 3 | 0.105  | 0.041    | -0.003    | 1 | 21.48 | 20 | 21  | 1  | 163  | -1.44 |
| 2294.1 | 14 | Q8WYK2 | R.TDSVKTPESEGNPLI  | TDSVKT[181.014]VKTPESEGNPLI  | 2 | 0.367  | 0.022    | -0.003    | 1 | 24.07 | 20 | 24  | 1  | 163  | -1.44 |
| 2355.1 | 20 | Q8WYK2 | K.LPISDPPDQEIHV    | LPISDS[166.9984]PPDQEIHV     | 3 | 1.321  | 0.002    | -0.004    | 0 | 34.61 | 21 | 49  | 5  | 2266 | -1.55 |
| 1350.6 | 5  | Q8WYK5 | R.TSFFLNSPEK.E     | TSFFLNS[166.9984]PEK         | 2 | -0.229 | 0.008    | -0.002    | 0 | 28.02 | 20 | 45  | 6  | 2266 | -1.86 |
| 1181.5 | 6  | Q8WYK5 | R.GREVSPPDVR.E     | GREVS[166.9984]PSPDVR        | 2 | -0.849 | 0.035    | -0.002    | 1 | 20.9  | 19 | 53  | 9  | 2266 | -1.81 |
| 1725.8 | 8  | Q8WYK5 | R.EQSSDLTSPGDVSP   | EQSSDLTSP[166.9984]GDVSPV    | 2 | 2.315  | 2.60E-05 | -0.004    | 0 | 53.51 | 20 | 66  | 7  | 773  | -2.48 |
| 2369   | 10 | Q8WYK5 | K.DNEEREQSDLTSP    | DNEEREQSDLTSPGDVSP[166.99    | 2 | -0.658 | 0.025    | -0.004    | 1 | 23.73 | 20 | 53  | 5  | 773  | -1.53 |
| 1725.8 | 7  | Q8WYK5 | R.EQSSDLTSPGDVSP   | EQSSDLTSPGDVSP[166.9984]PV   | 2 | 1.564  | 1.50E-04 | -0.004    | 0 | 45.95 | 20 | 53  | 5  | 773  | -2.48 |
| 2318.9 | 9  | Q8WYK5 | K.YGGSDHPSDGETI    | YGGSD[166.9984]DHPSDGETS     | 3 | 0.029  | 0.049    | -0.003    | 0 | 20.62 | 20 | 38  | 7  | 773  | -1.44 |
| 2398.9 | 5  | Q8WYK5 | K.YGGSDHPSDGETI    | Y[243.0297]GGSDHPSDGETI      | 2 | -0.563 | 0.02     | -0.007    | 0 | 22.63 | 18 | 38  | 7  | 773  | -2.82 |
| 2318.9 | 21 | Q8WYK5 | K.YGGSDHPSDGETI    | YGGSDHPS[166.9984]DGETS      | 3 | 1.041  | 0.004    | -0.004    | 0 | 30.76 | 20 | 88  | 7  | 773  | -1.74 |
| 2981.3 | 5  | Q8WZ64 | K.CSEINHMHNAHLAI   | C[160.0307]SEINHMHNAHLAL     | 3 | 1.053  | 0.005    | -0.005    | 0 | 29.88 | 19 | 30  | 6  | 1704 | -1.84 |
| 2258   | 9  | Q8WZ73 | R.VPAEDETQSDISE    | VPAEDETQSDI[166.9984]EDSI    | 2 | 1.458  | 1.90E-04 | -0.004    | 0 | 45.94 | 21 | 46  | 2  | 363  | -1.92 |
| 2337.9 | 6  | Q8WZ73 | R.VPAEDETQSDISE    | VPAEDETQSDI[166.9984]JDSI    | 2 | -0.315 | 0.011    | -0.006    | 0 | 27.11 | 20 | 58  | 3  | 363  | -2.6  |
| 1435.7 | 8  | Q92466 | R.SRSPLEPEAK.K     | SRS[166.9984]PLEPEAK         | 2 | 0.396  | 0.002    | -0.003    | 1 | 35.32 | 21 | 35  | 2  | 427  | -2.37 |
| 1192.6 | 6  | Q92466 | R.SRSPLEPEAK.K     | S[166.9984]PLEPEAK           | 2 | 0.302  | 0.002    | -0.002    | 0 | 33.33 | 20 | 44  | 5  | 427  | -1.57 |
| 2082.9 | 11 | Q92499 | K.DNTRPGANSPEMV    | DNTRPGANS[166.9984]PEMV      | 3 | 0.348  | 0.023    | -0.004    | 1 | 23.91 | 20 | 24  | 2  | 740  | -1.87 |
| 1097.5 | 7  | Q92508 | R.TASELLDR.R       | TAS[166.9984]ELLDR           | 2 | 1.978  | 1.30E-05 | -0.002    | 0 | 56.66 | 20 | 56  | 4  | 2521 | -1.46 |
| 2936.3 | 23 | Q92508 | R.ELDDDERVDASPT    | ELDDDERVDAS[166.9984]PTA     | 3 | 0.663  | 0.011    | -0.005    | 1 | 27.99 | 21 | 61  | 5  | 2521 | -1.83 |
| 1798.9 | 9  | Q92508 | K.DPGLPEGPDSPGG    | DPGLPEGPDSPGG[166.9984]PGGS  | 2 | -0.062 | 0.006    | -0.005    | 0 | 30.67 | 21 | 75  | 5  | 2521 | -2.7  |
| 1798.8 | 5  | Q92508 | K.DPGLPEGPDSPGG    | DPGLPEGPDSPGG[166.9984]S     | 2 | -0.342 | 0.012    | -0.005    | 0 | 27.97 | 21 | 88  | 5  | 2521 | -2.7  |
| 1413.6 | 9  | Q92508 | R.SGSEEAIVDTPGER   | S[166.9984]EAVDTPGER         | 2 | -0.658 | 0.022    | -0.002    | 0 | 23.78 | 20 | 47  | 4  | 2521 | -1.31 |
| 2838.2 | 12 | Q92538 | R.ADAPDAGAQSDSE    | ADAPDAGAQSD[166.9984]DSEI    | 3 | 1.41   | 6.10E-04 | -0.007    | 0 | 39.08 | 19 | 39  | 3  | 1859 | -2.57 |
| 2838.2 | 9  | Q92538 | R.ADAPDAGAQSDSE    | ADAPDAGAQSD[166.9984]JELI    | 3 | 1.163  | 0.004    | -0.007    | 0 | 30.96 | 19 | 31  | 3  | 1859 | -2.57 |
| 2510   | 22 | Q92552 | K.ALTSADGAEQSQS    | ALTSADGAEQSQSDNEDNQSGE       | 3 | 0.615  | 0.012    | -0.001    | 0 | 26.5  | 20 | 26  | 2  | 414  | -0.55 |
| 2841.2 | 24 | Q92576 | K.RLQEQDENLQD      | RLQEQDENLQDNQTSN[16          | 3 | 2.479  | 1.80E-04 | -0.005    | 1 | 45.19 | 20 | 89  | 3  | 2039 | -1.91 |
| 4077.8 | 23 | Q92598 | K.NVQQDNSEAGTQF    | NVQQDNSEAGTQFQVQVTAQQ        | 4 | 0.038  | 0.004    | -0.011    | 0 | 30.91 | 20 | 42  | 5  | 858  | -2.77 |
| 4077.8 | 17 | Q92598 | K.NVQQDNSEAGTQF    | NVQQDNSEAGTQFQVQVTAQQ        | 4 | 0.038  | 0.003    | -0.01     | 1 | 30.28 | 18 | 42  | 5  | 858  | -2.2  |
| 4637.1 | 15 | Q92598 | K.NVQQDNSEAGTQF    | NVQQDNSEAGTQFQVQVTAQQ        | 4 | 0.246  | 0.014    | -0.013    | 1 | 24    | 18 | 72  | 7  | 858  | -2.77 |
| 4077.8 | 15 | Q92598 | K.NVQQDNSEAGTQF    | NVQQDNSEAGTQFQVQVTAQQ        | 4 | -0.146 | 0.049    | -0.011    | 0 | 20.23 | 20 | 66  | 5  | 858  | -2.75 |
| 1122.5 | 4  | Q92614 | K.SSSPSTYWK.S      | SSS[166.9984]PSTYWK          | 2 | -0.344 | 0.011    | -0.002    | 0 | 24.92 | 18 | 25  | 1  | 2054 | -2.15 |
| 1762.6 | 10 | Q92614 | R.YSHSYLSDSTEAK    | YSHSY[243.0297]LSDS[166.998  | 2 | -0.516 | 0.017    | -0.005    | 0 | 21.23 | 16 | 24  | 2  | 2054 | -2.98 |
| 2086.9 | 9  | Q92614 | R.SFTSRQPEESGLGI   | SFTSRQPEESGLGI[166.9984]FRQ  | 3 | 1.174  | 0.004    | -0.004    | 1 | 33.07 | 21 | 39  | 5  | 2054 | -1.79 |
| 1340.6 | 9  | Q92615 | R.SPSPAHLPPDPK.V   | SPS[166.9984]PAHLPPDPK       | 2 | -0.65  | 0.023    | -0.003    | 0 | 23.79 | 20 | 24  | 8  | 738  | -2.1  |
| 1407.6 | 6  | Q92667 | K.SIPLECLSPK.G     | SIPLECL[160.0307]PLS[166.998 | 2 | -0.613 | 0.022    | -0.002    | 0 | 24.18 | 20 | 56  | 7  | 903  | -1.58 |
| 1587.7 | 10 | Q92667 | R.SSESGILPNTTDMR   | S[166.9984]ESSGILPNTTDMR     | 2 | 1.806  | 9.10E-05 | -0.003    | 0 | 48.37 | 20 | 56  | 7  | 903  | -1.83 |
| 1587.7 | 11 | Q92667 | R.SSESGILPNTTDMR   | SES[166.9984]GILPNTTDMR      | 2 | 1.938  | 6.80E-05 | -0.003    | 0 | 49.64 | 20 | 71  | 4  | 903  | -1.83 |
| 1407.7 | 5  | Q92667 | K.SIPLECLSPK.G     | SIPLECL[160.0307]PLS[166.998 | 2 | -0.134 | 0.007    | -0.002    | 0 | 29.05 | 20 | 29  | 3  | 903  | -1.58 |
| 1587.7 | 9  | Q92667 | R.SSESGILPNTTDMR   | SES[166.9984]GILPNTTDMR      | 2 | -0.488 | 0.018    | -0.003    | 0 | 25.34 | 20 | 25  | 2  | 903  | -1.83 |
| 3651.8 | 24 | Q92667 | K.TVLGPDTAEPATAE   | TVLGPDTAEPATAEAAVAPDAG       | 3 | 1.3    | 0.003    | -0.004    | 0 | 30.4  | 17 | 37  | 2  | 903  | -1.16 |
| 1258.5 | 8  | Q92685 | R.SGSAQAQGLCK.Q    | SGSAQAQGLCK[160.2            | 2 | 1.978  | 4.50E-05 | -0.002    | 0 | 50.36 | 19 | 50  | 1  | 438  | -1.51 |
| 2327.9 | 17 | Q92733 | K.IAAPHLKHGSDSEI   | IAAPHLKHGSDSEI[166.9984]DS   | 3 | -0.872 | 0.044    | -0.006    | 1 | 21.54 | 20 | 33  | 6  | 491  | -2.63 |
| 2876.2 | 17 | Q92733 | K.QITQEEEDSDEEVA   | QITQEEEDS[166.9984]DEEVAP    | 3 | 0.77   | 0.009    | -0.003    | 0 | 28.03 | 20 | 33  | 6  | 491  | -2.02 |
| 2085   | 12 | Q92738 | R.IEVLVDTGAGGY.S   | IEVLVDTGAGGYSGNSGS[166.9     | 2 | 1.598  | 1.30E-04 | -0.004    | 0 | 47.34 | 21 | 47  | 4  | 828  | -1.12 |
| 2085   | 13 | Q92738 | R.IEVLVDTGAGGY.S   | IEVLVDTGAGGYSGNSGS[166.998   | 2 | 1.93   | 6.30E-05 | -0.004    | 0 | 50.61 | 21 | 51  | 7  | 828  | -2.02 |
| 1799.7 | 12 | Q92766 | K.LAEETEGPSDGEA    | LAETEGPSDGEA[166.9984]DGESAA | 2 | 2.863  | 2.20E-06 | -0.006    | 0 | 63.87 | 20 | 81  | 4  | 1687 | -3.57 |
| 4129.7 | 28 | Q92766 | K.FSPFLQTAEDNTQ    | FSPFLQTAEDNTQDEVAGPADH       | 4 | -0.092 | 0.004    | -0.005    | 0 | 29.4  | 18 | 62  | 2  | 1687 | -1.31 |
| 2214   | 11 | Q92766 | R.QVAGDAPVEQATA    | QVAGDAPVEQATAETAETAS[166.99  | 3 | 0.184  | 0.037    | -0.006    | 0 | 22.2  | 20 | 62  | 3  | 1687 | -2.6  |
| 3509.5 | 22 | Q92769 | R.MLPHAPGVQMQA     | MLPHAPGVQMQAIPEDAVHDS        | 4 | 0.834  | 0.005    | -0.008    | 0 | 31.03 | 21 | 73  | 5  | 488  | -2.36 |
| 2161.7 | 8  | Q92769 | R.IACDEEFSDEDEGI   | IAC[160.0307]DEEFS[166.998   | 2 | 0.901  | 7.10E-04 | -0.005    | 0 | 33.37 | 14 | 73  | 5  | 488  | -2.49 |
| 2317.8 | 8  | Q92769 | R.IACDEEFSDEDEGI   | IAC[160.0307]DEEFS[166.998   | 2 | 0.258  | 0.003    | -0.005    | 0 | 28.87 | 16 | 106 | 5  | 488  | -2.15 |
| 3827.6 | 33 | Q92794 | R.WTPVIVNSVNSV     | WTPVIVNSVNSV[166.9984]JEEI   | 3 | 0.583  | 0.014    | 2.00E-04  | 0 | 25.19 | 19 | 25  | 2  | 2004 | 0.05  |
| 1937.9 | 8  | Q92797 | K.EERSPQLAPVGED    | EERS[166.9984]PQLAPVGEDA     | 2 | -0.954 | 0.047    | -0.005    | 1 | 21.79 | 21 | 22  | 4  |      |       |

|        |    |         |                   |                             |   |        |          |        |   |       |    |     |    |      |       |
|--------|----|---------|-------------------|-----------------------------|---|--------|----------|--------|---|-------|----|-----|----|------|-------|
| 1148.5 | 5  | Q960F8  | K.ELIPQESPR.V     | ELIPQES[166.9984]PR         | 2 | -0.974 | 0.048    | -0.002 | 0 | 20.55 | 20 | 21  | 1  | 476  | -1.91 |
| 2219.8 | 10 | Q960E2  | K.DIKEESDEEEEDDEE | DIKEES[166.9984]DEEEEDDEES  | 2 | 1.978  | 3.10E-05 | -0.005 | 1 | 49.43 | 17 | 98  | 2  | 1170 | -2.07 |
| 4317.3 | 22 | Q960F5  | R.SSKHSGGGGGGGGG  | SS[166.9984]KHS[166.9984]G  | 4 | 0.15   | 0.023    | -0.006 | 1 | 16.63 | 13 | 17  | 5  | 646  | -1.38 |
| 2792   | 29 | Q960F3  | R.DEEERYFDEEPEEDP | DEEERYFDEEPEEDP[166.9984]   | 3 | 0.697  | 0.011    | -0.006 | 1 | 23.37 | 16 | 23  | 1  | 343  | -2.22 |
| 1769.8 | 13 | Q960R6  | K.SQDVAVSQQQQ     | SQDVAVS[166.9984]PQQQQC     | 2 | 0.001  | 0.005    | -0.004 | 0 | 30.37 | 20 | 30  | 1  | 508  | -2.15 |
| 1695.7 | 12 | Q960F0  | K.SDATNYASHSPVNV  | SDATNYASHS[166.9984]PPVNR   | 3 | 0.012  | 0.046    | -0.003 | 0 | 20.55 | 20 | 21  | 1  | 436  | -1.73 |
| 2721.2 | 10 | Q960F4  | K.PVSPSADSETPLTQ  | PSVPSADSETPLTQDRPGS[166.9   | 3 | 1.385  | 0.002    | -0.008 | 1 | 33.25 | 19 | 33  | 3  | 1042 | -2.98 |
| 2721.2 | 18 | Q960F4  | K.PVSPSADSETPLTQ  | PSVPSADSETPLTQDRPGSPS[166   | 3 | 1.544  | 5.60E-04 | -0.008 | 1 | 39.36 | 19 | 39  | 4  | 1042 | -2.98 |
| 1866.8 | 9  | Q960F9  | K.SGLSDLAESLNDNI  | SGLSDLAESLNDNETNS           | 2 | 1.434  | 1.70E-04 | -0.005 | 0 | 45.7  | 21 | 46  | 1  | 657  | -2.47 |
| 2892.3 | 21 | Q960F9  | K.ELPPSSEIEIKGEDI | ELPPSSEIEIK[181.014]GEDEIEI | 3 | 0.447  | 0.018    | -0.007 | 1 | 25.81 | 21 | 77  | 2  | 657  | -2.6  |
| 2976.7 | 7  | Q960F1  | K.QEPLGSDSEGIVNCL | QEPGSDS[166.9984]EGVNC[1    | 3 | 0.912  | 0.006    | -0.01  | 0 | 30.47 | 21 | 30  | 1  | 271  | -3.35 |
| 2582.1 | 14 | Q960G6  | R.QENCGAQVPAQF    | QENCL[160.0307]GAQVPAQPC    | 3 | -0.017 | 0.048    | -0.006 | 0 | 21.19 | 21 | 21  | 2  | 650  | -2.49 |
| 2582.1 | 28 | Q960G6  | R.QENCGAQVPAQF    | QENCL[160.0307]GAQVPAQPC    | 3 | 0.907  | 0.006    | -0.006 | 0 | 30.47 | 21 | 30  | 2  | 650  | -2.49 |
| 2582.1 | 13 | Q960G6  | R.QENCGAQVPAQF    | QENCL[160.0307]GAQVPAQPC    | 3 | 1.544  | 8.60E-04 | -0.006 | 0 | 38.7  | 21 | 39  | 2  | 650  | -2.49 |
| 1927.8 | 10 | Q960M8  | M.AADSDDGAVSAPV   | AADS[166.9984]DDGAVSAPAA    | 2 | 2.237  | 3.00E-05 | -0.005 | 0 | 53.73 | 21 | 54  | 1  | 510  | -2.69 |
| 1914.8 | 13 | Q960N5  | K.TNPVEMVVDLSLSE  | TNPVEMVVDLSL[166.9984]DL    | 2 | -0.863 | 0.037    | -0.004 | 0 | 21.73 | 20 | 29  | 3  | 454  | -2.95 |
| 1817.7 | 15 | Q960N5  | K.ASLVSEEEEDDEEK  | ASLV[166.9984]EEDEEEDK      | 2 | -0.809 | 0.037    | -0.004 | 0 | 20.27 | 18 | 20  | 2  | 454  | -2.35 |
| 2083.9 | 12 | Q960E7  | K.YSEANNUECEQV    | YSEANNUEC[160.0307]EQAE     | 2 | -0.668 | 0.023    | 0.001  | 0 | 23.68 | 20 | 24  | 1  | 468  | 0.56  |
| 811.42 | 4  | Q960F1  | R.ISRSRIR         | ISRS[166.9984]IR            | 2 | -0.48  | 0.016    | -0.002 | 1 | 26.56 | 21 | 27  | 2  | 295  | -2.03 |
| 2025.8 | 13 | Q960R8  | K.NDQEPPEALDFSC   | NDQEPPEALDF[166.9984]DD     | 2 | 1.218  | 3.20E-04 | -0.003 | 0 | 42.54 | 20 | 49  | 3  | 494  | -1.52 |
| 1231.6 | 6  | Q960F1  | R.LEPTAPALS       | LEPTAPALS[166.9984]PR       | 2 | -0.812 | 0.036    | -0.002 | 0 | 22.21 | 20 | 22  | 3  | 538  | -2.38 |
| 1703.8 | 5  | Q960C9  | K.DNPSPEPQLDIIKR  | DNPS[166.9984]PEPQLDIIKR    | 2 | -0.823 | 0.038    | -0.004 | 1 | 22.99 | 21 | 23  | 2  | 268  | -2.28 |
| 3106.1 | 27 | Q960H7  | R.GNSVELEEMDSQ    | GNS[166.9984]VELEEMDSQD     | 3 | 1.472  | 3.20E-04 | -0.004 | 0 | 39.78 | 17 | 40  | 2  | 1222 | -1.44 |
| 1556.6 | 7  | Q960K2  | K.VDDLSSPTSPER    | VDDLSSPT[181.014]SSPER      | 2 | 0.511  | 0.002    | -0.002 | 0 | 35.33 | 20 | 35  | 3  | 942  | -0.95 |
| 1614.7 | 5  | Q960M3  | R.KTSPASLDFPESQK  | KTSPASL[166.9984]LDFPESQK   | 3 | 0.057  | 0.044    | -0.003 | 1 | 21.97 | 21 | 150 | 17 | 812  | -2.09 |
| 999.4  | 6  | Q960M3  | R.GGSDPLWK        | GGSD[166.9984]PLWK          | 2 | -0.335 | 0.011    | -0.002 | 0 | 26.01 | 19 | 150 | 17 | 812  | -2.1  |
| 2293.9 | 18 | Q960M3  | K.GQESSDDQEQVDV   | GQESS[166.9984]SDQEQVDVE    | 3 | 1.339  | 0.002    | -0.003 | 0 | 33.79 | 20 | 150 | 17 | 812  | -1.35 |
| 2314.1 | 17 | Q960M3  | K.LAPVPSPEPKPAP   | LAPVPS[166.9984]PEPKPAPV    | 2 | 0.738  | 0.009    | -0.004 | 1 | 27.78 | 20 | 150 | 17 | 812  | -1.74 |
| 2373.9 | 9  | Q960M3  | K.GQESSDDQEQVDV   | GQESS[166.9984]SDQEQVDVE    | 2 | -0.938 | 0.049    | -0.007 | 0 | 18.98 | 18 | 150 | 17 | 812  | -2.83 |
| 1981.8 | 18 | Q960M3  | K.DNQESSDAELSSSE  | DNQESS[166.9984]DAELSSSEYI  | 2 | 1.978  | 2.00E-05 | -0.006 | 0 | 54.65 | 20 | 150 | 17 | 812  | -3.06 |
| 1614.7 | 9  | Q960M3  | R.KTSPASLDFPESQK  | KTSPASL[166.9984]LDFPESQK   | 2 | 1.745  | 9.50E-05 | -0.003 | 1 | 48.81 | 21 | 150 | 17 | 812  | -1.84 |
| 1346.6 | 7  | Q960M3  | K.TAPTLSPHAW      | TAPTL[166.9984]PHAW         | 2 | 0.298  | 0.003    | -0.002 | 0 | 33.24 | 20 | 215 | 12 | 812  | -1.8  |
| 2061.8 | 12 | Q960M3  | K.DNQESSDAELSSSE  | DNQESS[166.9984]DAELSSSE    | 2 | 0.005  | 0.005    | -0.005 | 0 | 29.31 | 19 | 215 | 12 | 812  | -2.28 |
| 1346.6 | 6  | Q960M3  | K.TAPTLSPHAW      | TAPTL[181.014]LSPHAW        | 2 | 0.398  | 0.002    | -0.002 | 0 | 34.31 | 20 | 110 | 14 | 812  | -1.8  |
| 2293.9 | 6  | Q960M3  | K.GQESSDDQEQVDV   | GQESS[166.9984]DQEQVDVE     | 2 | -0.359 | 0.011    | -0.005 | 0 | 26.63 | 20 | 180 | 12 | 812  | -2.09 |
| 1614.7 | 16 | Q960M3  | R.KTSPASLDFPESQK  | KT[181.014]LSPHAW           | 3 | 1.274  | 0.003    | -0.003 | 1 | 34.4  | 21 | 121 | 11 | 812  | -2.09 |
| 1486.6 | 6  | Q960M3  | K.TSPASLDFPESQK   | TS[166.9984]LDFPESQK        | 2 | -0.496 | 0.018    | -0.003 | 0 | 25.14 | 20 | 150 | 17 | 812  | -1.9  |
| 1448.6 | 7  | Q960M3  | R.KPSPSPPEPWK     | KPSPS[166.9984]JESPEPWK     | 2 | -0.742 | 0.029    | -0.004 | 1 | 23.94 | 21 | 150 | 17 | 812  | -2.56 |
| 2373.9 | 14 | Q960M3  | K.GQESSDDQEQVDV   | GQESS[166.9984]SDQEQVDVE    | 2 | 1.982  | 1.20E-07 | -0.007 | 0 | 75.04 | 18 | 197 | 11 | 812  | -2.83 |
| 2293.9 | 12 | Q960M3  | K.GQESSDDQEQVDV   | GQESS[166.9984]SDQEQVDVE    | 3 | 1.394  | 0.001    | -0.003 | 0 | 36.21 | 20 | 139 | 8  | 812  | -1.35 |
| 2812.1 | 20 | Q960Q2  | K.HEPHQDSGEEAEG   | HEPHQDS[166.9984]GEEAEGC    | 3 | 1.559  | 4.80E-04 | -0.007 | 0 | 39.84 | 19 | 40  | 3  | 1002 | -2.34 |
| 1927.7 | 11 | Q960K1  | R.LPDSDDDEEETAI   | LPDS[166.9984]DDDEEETAIQ    | 2 | 1.978  | 1.10E-09 | -0.005 | 0 | 94.54 | 17 | 95  | 2  | 471  | -2.46 |
| 2271.9 | 7  | Q960K8  | K.DFDIAEQNESSDE   | DFDIAEQNES[166.9984]S[166.! | 2 | -0.844 | 0.034    | -0.004 | 1 | 19.92 | 18 | 99  | 4  | 554  | -1.97 |
| 3113.2 | 16 | Q960K8  | R.EAEGVAEEQEEQ    | EAEGVAEEQEEQ[166.9984]      | 2 | 1.472  | 8.30E-07 | -0.009 | 1 | 68.64 | 20 | 74  | 4  | 554  | -2.98 |
| 1059.3 | 3  | Q960P4  | K.PCTYGLR         | PC[160.0307]T[181.014]YGLR  | 2 | -0.569 | 0.019    | 0.003  | 0 | 24.57 | 20 | 25  | 2  | 475  | 2.66  |
| 1533.6 | 14 | Q960R1  | R.DSDGDVDFEAEIK   | DS[166.9984]DGDVDFEAEIK     | 2 | -0.914 | 0.044    | -0.003 | 1 | 20.15 | 19 | 20  | 3  | 1074 | -1.81 |
| 1558.7 | 12 | Q960L3  | R.AASPHQVTPQADE   | AAS[166.9984]HQVTPQADEK     | 2 | 0.273  | 0.003    | -0.003 | 0 | 33.02 | 20 | 33  | 3  | 2696 | -1.68 |
| 2341.6 | 16 | Q960L1  | R.PKPDGEDTSGEED   | PKPDGEDT[166.9984]GEEDAD    | 3 | 1.374  | 0.001    | -0.006 | 1 | 33.14 | 17 | 33  | 1  | 3159 | -2.62 |
| 2421.8 | 9  | Q960L1  | R.PKPDGEDTSGEED   | PKPDGEDT[181.014]S[166.998  | 3 | 1.472  | 9.50E-04 | -0.004 | 1 | 31.2  | 13 | 31  | 4  | 3159 | -1.84 |
| 2002.8 | 16 | Q960M2  | R.EAAENDEEPEGEAT  | EAAENDEEPEGEATGEAVR         | 3 | 0.452  | 0.018    | -0.007 | 0 | 24.92 | 20 | 25  | 1  | 331  | -3.58 |
| 1604.7 | 10 | Q960M7  | R.PGGSGSQSGPSP    | PGGSGSQSGP[166.9984]PQ      | 2 | -0.29  | 0.011    | -0.002 | 0 | 28.41 | 21 | 28  | 2  | 304  | -2.25 |
| 1583.7 | 16 | Q960M2  | R.TSPGGSEAEVLA    | TQS[166.9984]GGC[160.0307   | 2 | 1.016  | 5.30E-04 | -0.004 | 0 | 41.49 | 21 | 41  | 3  | 286  | -2.42 |
| 1461.6 | 7  | Q960M2  | K.TSGAPGSPQTPPER  | TSGAPGS[166.9984]PQTPPER    | 2 | -0.693 | 0.026    | -0.002 | 0 | 23.46 | 20 | 23  | 2  | 286  | -1.48 |
| 2275.9 | 9  | Q960M1  | K.AALLAQYADVTEE   | AALLAQYADV[181.014]DEEDE    | 2 | 1.978  | 8.40E-06 | -0.005 | 0 | 58.53 | 20 | 59  | 2  | 224  | -2.17 |
| 1564.7 | 8  | Q960N4  | R.SPEAVGPELEAEK   | S[166.9984]PEAVGPELEAEK     | 2 | 0.945  | 5.60E-04 | -0.003 | 0 | 39.81 | 20 | 40  | 1  | 725  | -1.9  |
| 1759.8 | 11 | Q960N6  | R.AGGGPTLQPPSS    | AGGGPTLQ[160.0307]PPSS      | 2 | -0.005 | 0.005    | -0.005 | 0 | 30.31 | 20 | 30  | 2  | 472  | -2.72 |
| 1759.8 | 19 | Q960N6  | R.AGGGPTLQPPSS    | AGGGPTLQ[160.0307]PPSS      | 2 | 0.286  | 0.002    | -0.005 | 0 | 33.15 | 20 | 33  | 1  | 472  | -2.72 |
| 2268   | 10 | Q960N7  | R.SLSNSNDISGTPS   | SLSNSNDISGTPS[166.9984]P    | 2 | 2.281  | 2.60E-05 | -0.006 | 0 | 54.17 | 21 | 54  | 5  | 2140 | -2.71 |
| 2268   | 7  | Q960N7  | R.SLSNSNDISGTPS   | SLSNSNDISGTPS[181.014]P     | 2 | 1.209  | 3.20E-04 | -0.006 | 0 | 43.4  | 21 | 43  | 3  | 2140 | -2.71 |
| 2268   | 13 | Q960N7  | R.SLSNSNDISGTPS   | SLSNSNDISGTPS[181.014]P     | 2 | 1.955  | 5.80E-05 | -0.006 | 0 | 50.77 | 21 | 51  | 4  | 2140 | -2.71 |
| 2268   | 13 | Q960N7  | R.SLSNSNDISGTPS   | SLSNSNDISGTPS[166.9984]P    | 2 | 2.863  | 9.60E-08 | -0.006 | 0 | 78.57 | 21 | 79  | 7  | 2140 | -2.71 |
| 2801.1 | 6  | Q960N3  | K.KEENADSDDEEL    | KEENADS[166.9984]DDEGELQ    | 3 | 0.317  | 0.022    | -0.004 | 1 | 22.52 | 19 | 23  | 2  | 372  | -1.61 |
| 2723.2 | 16 | Q960P16 | K.VDENENCSLGS     | VDENENC[160.0307]SLGS[166   | 3 | 0.374  | 0.023    | -0.006 | 0 | 24.14 | 20 | 24  | 1  | 312  | -2.09 |
| 1455.6 | 4  | Q960P2  | R.YSSSEVNHLSR     | YSSS[166.9984]EVNHLSR       | 2 | -0.837 | 0.037    | -0.003 | 0 | 21.94 | 20 | 22  | 6  | 775  | -1.97 |
| 3774.4 | 26 | Q960P6  | R.GQPNYDVGAGQ     | GQPNYDVGAGQPSAAYLSMSQ       | 3 | 0.875  | 0.007    | -0.011 | 0 | 29.15 | 20 | 29  | 4  | 609  | -2.8  |
| 906.46 | 3  | Q960P6  | R.TRLSPR          | TRLS[166.9984]PR            | 2 | -0.609 | 0.023    | -0.002 | 1 | 24.2  | 20 | 24  | 5  | 669  | -2.18 |
| 1126.5 | 5  | Q960P6  | R.QPTPPFFGR       | QPT[181.014]PPFFGR          | 2 | -0.808 | 0.035    | -0.002 | 0 | 22.31 | 20 | 28  | 4  | 669  | -1.8  |
| 1527.6 | 8  | Q960P4  | K.RPISDDDCPSAK    | RPIS[166.9984]DDDC[160.030  | 2 | 0.765  | 7.90E-04 | -0.003 | 1 | 38.01 | 20 | 38  | 1  | 802  | -2.1  |
| 1455.6 | 8  | Q960P5  | R.TSPQELSEELSR    | TS[166.9984]PQELSEELSR      | 2 | -0.467 | 0.016    | -0.004 | 0 | 25.66 | 20 | 26  | 1  | 975  | -2.52 |
| 3631.5 | 13 | Q960C0  | K.LIPLDECSMDT     | LIPLDE[160.0307]SMDT        | 2 | 1.074  | 0.004    | -0.006 | 0 | 31.14 | 20 | 37  | 4  | 940  | -1.69 |
| 3631.5 | 11 | Q960C0  | K.LIPLDECSMDT     | LIPLDE[160.0307]SMDT        | 2 | 1.472  | 0.001    | -0.006 | 0 | 36.87 | 20 | 40  | 5  | 940  | -1.69 |
| 866.44 | 7  | Q960C0  | K.VLSPATAK        | VLS[166.9984]PTAAK          | 2 | -0.735 | 0.031    | -0.002 | 0 | 22.98 | 20 | 40  | 5  | 940  | -1.72 |
| 3631.5 | 27 | Q960C0  | K.LIPLDECSMDT     | LIPLDE[160.0307]SMDT        | 2 | 1.517  | 0.001    | -0.006 | 0 | 36.96 | 20 | 55  | 5  | 940  | -1.64 |
| 1989.8 | 18 | Q960E3  | K.AADVPSPFDESSQ   | AADVPSPFDESS[166.9984]QDT   | 2 | -0.522 | 0.018    | -0.006 | 0 | 24.04 | 19 | 31  | 6  | 1844 | -2.86 |
| 3197.3 | 7  | Q960E3  | K.SPESVPVDSNKDCT  | SPES[166.9984]VPVDS[166.998 | 3 | 0.7    | 0.01     | -0.005 | 1 | 26.33 | 19 | 31  | 6  | 1844 | -1.72 |
| 1931.7 | 9  | Q960R8  | R.RGGSGGGGEESE    | GGSGGGGEEES[166.9984]EGEE   | 2 | 1.591  | 1.20E-04 | -0.004 | 1 | 41.27 | 15 | 41  | 1  | 312  | -2.3  |
| 1753.7 | 12 | Q960R8  | R.RGGSGGGGEESE    | GGSGGGGEEES[166.9984]EGEE   | 2 | -0.645 | 0.023    | -0.005 | 0 | 18.88 | 15 | 29  | 2  | 312  | -2.67 |
| 1753.7 | 6  | Q960R0  | K.NSTDLSDAPEDPTS  | NSTDLSDAPEDPTS[166.9984]P   | 2 | 0.191  | 0.004    | -0.006 | 0 | 31.27 | 19 | 31  | 6  | 1608 | -     |



|      |    |              |                   |                                |   |        |          |           |   |       |    |     |    |      |       |
|------|----|--------------|-------------------|--------------------------------|---|--------|----------|-----------|---|-------|----|-----|----|------|-------|
| 2555 | 12 | Q96T88       | K.ERDSELDSDTDSGCC | ERDSELDST[181.014]D5GC[160     | 3 | 1.41   | 1.40E-05 | -0.007    | 1 | 54.68 | 19 | 55  | 2  | 793  | -2.95 |
| 2555 | 13 | Q96T88       | K.ERDSELDSDTDSGCC | ERDS[166.9984]ELSDSDTDSGC[16   | 3 | 1.472  | 3.10E-04 | -0.007    | 1 | 41.22 | 19 | 41  | 1  | 793  | -2.95 |
| 2128 | 20 | Q96TA1       | K.AAPEASPPASPLQ   | AAPEAS[166.9984]SPPAS[166.:    | 2 | -0.639 | 0.024    | -0.004    | 0 | 24.92 | 21 | 66  | 5  | 746  | -1.94 |
| 3721 | 21 | Q96TA1       | K.QVSVVQDEEVLQ    | QVSVVQDEEVLQPFASPS[16          | 3 | 1.793  | 8.70E-04 | -0.004    | 0 | 38.28 | 20 | 78  | 5  | 746  | -0.94 |
| 2128 | 19 | Q96TA1       | K.AAPEASPPASPLQ   | AAPEAS[166.9984]PPAS[166.:     | 2 | 0.97   | 6.00E-04 | -0.004    | 0 | 41.03 | 21 | 41  | 3  | 746  | -1.94 |
| 3641 | 15 | Q96TA1       | K.QVSVVQDEEVLQ    | QVSVVQDEEVLQPFASPSPPF          | 3 | 1.559  | 2.60E-04 | -0.004    | 0 | 42.88 | 19 | 75  | 4  | 746  | -0.95 |
| 3721 | 24 | Q96TA1       | K.QVSVVQDEEVLQ    | QVSVVQDEEVLQPFASPS[16          | 3 | 2.76   | 4.60E-05 | -0.004    | 0 | 51.02 | 20 | 75  | 4  | 746  | -0.94 |
| 2045 | 11 | Q96T7C       | R.SQSLPNSLDYQTSI  | SQSL[166.9984]PNSLDYQTSI       | 2 | -0.637 | 0.021    | -0.006    | 0 | 23.99 | 20 | 24  | 2  | 470  | -2.87 |
| 1786 | 10 | Q99081       | R.TSSTNEDEDLNPEQ  | TSS[166.9984]TNEDEDLNPEQ       | 2 | -0.342 | 0.013    | -0.004    | 0 | 25.84 | 19 | 26  | 4  | 682  | -2.21 |
| 1786 | 10 | Q99081       | R.TSSTNEDEDLNPEQ  | T[181.014]SSTNEDEDLNPEQ        | 2 | -0.729 | 0.03     | -0.004    | 0 | 22.07 | 19 | 22  | 2  | 682  | -2.21 |
| 3034 | 14 | Q99442       | K.EELEQQTGDGCEC   | ELEEQQT[181.014]DGGC[160.0     | 3 | 1.41   | 2.30E-05 | -0.007    | 0 | 50.38 | 16 | 50  | 1  | 399  | -2.19 |
| 2171 | 14 | Q99459       | K.GGLNTPHESDFSG   | GGLNTPHES[166.9984]DFSGV       | 3 | 0.441  | 0.02     | -0.005    | 0 | 25.81 | 21 | 26  | 2  | 802  | -2.33 |
| 2171 | 24 | Q99459       | K.GGLNTPHESDFSG   | GGLNTP[181.014]PHESDFSGVT      | 3 | 0.099  | 0.045    | -0.005    | 0 | 22.35 | 21 | 22  | 3  | 802  | -2.33 |
| 2389 | 11 | Q99549       | K.GYTSDDTWEPEIH   | GYT[181.014]DDDTWEPEIHLE       | 2 | -0.447 | 0.014    | -0.002    | 0 | 23.89 | 18 | 109 | 6  | 860  | -0.89 |
| 2238 | 8  | Q99549       | R.GAEAFGDSEEDGE   | GAEAFGDS[166.9984]EEDGEDV      | 2 | 1.978  | 2.20E-06 | -0.006    | 0 | 63.32 | 19 | 109 | 6  | 860  | -2.51 |
| 2389 | 11 | Q99549       | K.GYTSDDTWEPEIH   | GYTS[166.9984]DDDTWEPEIHL      | 3 | 1.357  | 0.002    | -0.004    | 0 | 30.9  | 17 | 117 | 6  | 860  | -1.89 |
| 1715 | 7  | Q99549       | K.PLDSAMSAEEDTD   | PLDSAMS[166.9984]AEEDTDV       | 2 | 0.415  | 0.002    | -0.003    | 0 | 33.48 | 19 | 105 | 5  | 860  | -1.67 |
| 1323 | 6  | Q99567       | R.EDVEAESPLR.V    | EDVEAES[166.9984]PLR           | 2 | -0.326 | 0.011    | -0.003    | 0 | 27.13 | 20 | 27  | 1  | 741  | -2.25 |
| 1742 | 18 | Q99575       | R.VQAYEESVASSPN   | VQAYEESVASS[166.9984]PNG       | 2 | 2.552  | 1.50E-05 | -0.004    | 0 | 55.88 | 20 | 56  | 2  | 1024 | -2.39 |
| 2682 | 19 | Q99590       | K.TEELIESPKLESSE  | TEELIES[166.9984]PKLESSEGEI    | 3 | 2.426  | 1.80E-04 | -0.004    | 1 | 44.66 | 20 | 166 | 12 | 1463 | -1.48 |
| 1939 | 11 | Q99590       | K.VETVSQPSPKDIT   | VETVSQPS[166.9984]PKDITD       | 2 | 0.673  | 9.90E-04 | -0.005    | 1 | 38.09 | 21 | 166 | 12 | 1463 | -2.63 |
| 3928 | 27 | Q99590       | R.AETASQSQSPISDI  | AETASQSQS[166.9984]PISDN       | 3 | 1.41   | 3.80E-06 | -0.008    | 1 | 60.51 | 19 | 166 | 12 | 1463 | -2.12 |
| 2406 | 10 | Q99590       | K.SSSNSVDTEAESI   | SSNS[166.9984]VDEETAESD        | 2 | 2.732  | 1.20E-06 | -0.007    | 0 | 67.12 | 21 | 166 | 12 | 1463 | -2.12 |
| 3928 | 20 | Q99590       | R.AETASQSQSPISDI  | AET[181.014]ASQSQSPISDN        | 3 | 1.544  | 3.30E-04 | -0.008    | 1 | 41.12 | 19 | 134 | 13 | 1463 | -2.12 |
| 2406 | 10 | Q99590       | K.SSSNSVDTEAESI   | SSNSVDTEAES[166.9984]D         | 2 | -0.553 | 0.019    | -0.005    | 0 | 24.86 | 20 | 205 | 14 | 1463 | -2.18 |
| 2543 | 18 | Q99590       | R.VGSSSSECAQDPL   | VGSS[166.9984]SSESC[160.03     | 3 | 0.365  | 0.024    | -0.005    | 0 | 25.05 | 21 | 166 | 12 | 1463 | -1.88 |
| 2970 | 21 | Q99590       | R.PISDINSNGCDAPG  | S[166.9984]PISDINSNGC[160.03   | 3 | 1.454  | 0.002    | -0.009    | 0 | 35.9  | 21 | 194 | 13 | 1463 | -3.11 |
| 3928 | 22 | Q99590       | R.AETASQSQSPISDI  | AETASQSQS[166.9984]QRSPI       | 4 | 0.15   | 0.019    | -0.013    | 1 | 23.74 | 19 | 123 | 14 | 1463 | -3.34 |
| 3928 | 38 | Q99590       | R.AETASQSQSPISDI  | AETASQSQSPIS[166.9984]DN       | 3 | 1.394  | 2.40E-06 | -0.008    | 1 | 62.58 | 19 | 205 | 14 | 1463 | -2.12 |
| 2246 | 14 | Q99590       | R.FHSPSTTWSPNKD   | FHS[166.9984]PSTTWS[166.99     | 3 | 0.61   | 0.014    | -0.006    | 1 | 25.44 | 19 | 209 | 14 | 1463 | -2.63 |
| 1596 | 7  | Q99613       | K.QPILLSDEEDTR    | KPILLS[166.9984]EDEDTR         | 2 | 1.108  | 4.40E-04 | -0.002    | 0 | 42.44 | 21 | 42  | 1  | 913  | -1.45 |
| 1540 | 6  | Q99613       | K.QNPEQSADEAEK    | QNPEQS[166.9984]ADEAEK         | 2 | 0.37   | 0.002    | -0.00E-04 | 0 | 30.96 | 17 | 97  | 5  | 913  | -0.37 |
| 1491 | 10 | Q99618       | K.QLSEVFETEDSK    | QLS[166.9984]EVFETEDSK         | 2 | 0.726  | 9.80E-04 | -0.002    | 0 | 37.62 | 20 | 38  | 1  | 268  | -1.44 |
| 1657 | 11 | Q99700       | K.ENIKNETSPFSK    | ENIKNETS[166.9984]PFSK         | 2 | 0.018  | 0.005    | -0.002    | 1 | 31.44 | 21 | 31  | 5  | 1313 | -1.37 |
| 3835 | 11 | Q99700       | K.DSFENSSNCTSGS   | DSFENSSN[160.0307]TSGS         | 3 | 0.165  | 0.035    | 0.004     | 1 | 21.08 | 19 | 35  | 9  | 1313 | 1.06  |
| 3835 | 22 | Q99700       | K.DSFENSSNCTSGS   | DSFENSSN[160.0307]TSGS         | 3 | 1.668  | 4.90E-04 | 0.004     | 1 | 39.67 | 19 | 44  | 7  | 1313 | 1.06  |
| 3016 | 15 | Q99733       | R.EFITGDVPTDAESE  | EFITGDVPTDAESE[166.9984]E      | 3 | 1.214  | 0.003    | -0.005    | 0 | 31.54 | 19 | 1   | 1  | 375  | -1.7  |
| 3016 | 18 | Q99733       | R.EFITGDVPTDAESE  | EFITGDVPTDAESE[166.9984]E      | 3 | 1.472  | 9.70E-04 | -0.005    | 0 | 36.41 | 19 | 36  | 2  | 375  | -1.7  |
| 1599 | 13 | Q99798       | K.DSSGQHVDSVPTC   | DSSGQHVDSVPTC[166.9984]E       | 2 | -0.775 | 0.028    | -0.002    | 0 | 23.64 | 21 | 24  | 2  | 746  | -1.42 |
| 1465 | 7  | Q99959       | R.RLEISPDSPER.A   | RLEIS[166.9984]PDSPER          | 2 | -0.757 | 0.032    | -0.005    | 1 | 22.76 | 20 | 23  | 4  | 881  | -3.36 |
| 2171 | 14 | Q999X3       | K.TLHCEGTEINSDDE  | TLH[160.0307]EGTEINS[166.9     | 2 | 1.097  | 3.90E-04 | 0.006     | 0 | 41.23 | 20 | 69  | 2  | 1015 | 2.61  |
| 2158 | 9  | Q990E3       | K.DYEEVADSDGEE    | DYEEVADSD[166.9984]ADGEE       | 2 | 1.978  | 4.40E-05 | -0.005    | 0 | 45.88 | 15 | 54  | 3  | 449  | -2.41 |
| 2087 | 17 | Q990E3_P683  | K.TIGGGDDSFNTFS   | TIGGGDDSFNTFS[166.9984]F       | 2 | -0.783 | 0.034    | -0.003    | 0 | 22.53 | 20 | 54  | 3  | 449  | -1.53 |
| 2828 | 21 | Q990E9       | K.VDSTNSSPQQS     | VDSTNSSPQQS[166.9984]S         | 3 | 2.631  | 8.50E-05 | -0.007    | 0 | 48.03 | 20 | 48  | 1  | 202  | -2.5  |
| 2908 | 14 | Q990E9       | K.VDSTNSSPQQS     | VDSTNSSPQQS[166.9984]S         | 3 | 1.05   | 0.005    | -0.007    | 0 | 28.84 | 18 | 56  | 2  | 202  | -2.44 |
| 2908 | 13 | Q990E9       | K.VDSTNSSPQQS     | VDSTNSSPQQS[166.9984]P         | 3 | 1.123  | 0.004    | -0.007    | 0 | 29.59 | 18 | 30  | 1  | 202  | -2.44 |
| 1337 | 6  | Q990G0       | K.EIPSATQSPISK    | EIPSATQSPISK[166.9984]PISK     | 2 | 0.01   | 0.006    | -0.002    | 0 | 31.46 | 21 | 69  | 11 | 1328 | -1.88 |
| 1801 | 8  | Q990G0       | K.PSQVNGAPGSPTE   | PSQVNGAPGS[166.9984]PTEPA      | 3 | 0.359  | 0.023    | -0.004    | 0 | 24.95 | 21 | 64  | 5  | 1328 | -2.24 |
| 1779 | 17 | Q990G0       | R.DPAQPMSPGEATQ   | DPAQPMSPGEATQ[166.9984]P       | 2 | 0.978  | 6.00E-04 | -0.004    | 0 | 41.11 | 21 | 61  | 10 | 1328 | -2.33 |
| 1417 | 6  | Q990G0       | K.EIPSATQSPISK    | EIP[166.9984]ATQ[166.9984      | 2 | -0.466 | 0.016    | -0.003    | 0 | 25.63 | 20 | 98  | 9  | 1328 | -2.42 |
| 2219 | 10 | Q990G0       | R.DPAQPMSPGEATQ   | DPAQPMSPGEATQ[166.9984]P       | 2 | -0.647 | 0.026    | -0.006    | 1 | 23.75 | 20 | 86  | 7  | 1328 | -2.6  |
| 1417 | 6  | Q990G0       | K.EIPSATQSPISK    | EIP[166.9984]AT[181.014]Q      | 2 | -0.507 | 0.018    | -0.003    | 0 | 25.29 | 20 | 84  | 6  | 1328 | -2.42 |
| 1465 | 7  | Q990G0       | K.EIPSATQSPISK    | EIP[181.014]QSPISK             | 2 | 0.461  | 0.002    | -0.003    | 1 | 35.83 | 21 | 86  | 7  | 1328 | -1.96 |
| 3435 | 23 | Q990K8       | K.EQQGKTEVLSSD    | EQGKTEVLSS[166.9984]D          | 2 | 0.206  | 0.018    | -0.007    | 1 | 21.72 | 17 | 22  | 4  | 851  | -1.53 |
| 1431 | 10 | Q998D0       | K.YEYDPPDISPRR    | YEYDPPDISPRR[166.9984]P        | 2 | -0.482 | 0.016    | -0.002    | 0 | 23.51 | 18 | 24  | 4  | 619  | -1.66 |
| 1294 | 5  | Q998D0       | R.HDTPDPSPPLR     | HDT[181.014]PDPSP[166.9984]    | 2 | -0.926 | 0.04     | -0.002    | 0 | 20.03 | 19 | 21  | 4  | 619  | -1.9  |
| 1590 | 7  | Q998J6       | R.ELDEEGSDPPLGR   | ELDEEGSDPPLGR[166.9984]P       | 2 | -0.592 | 0.022    | -0.003    | 0 | 24.34 | 20 | 24  | 1  | 194  | -2.08 |
| 1418 | 6  | Q998Q0       | R.GGGTDPANSLAPP   | GGGT[181.014]PDANSLAPP         | 2 | -0.831 | 0.034    | -0.003    | 0 | 23.02 | 21 | 23  | 2  | 406  | -1.94 |
| 2831 | 11 | Q998R8       | R.DSDSEEDLVSYGT   | DS[166.9984]DSEEDLVSYGTGL      | 3 | 0.542  | 0.016    | -0.007    | 1 | 25.85 | 20 | 26  | 3  | 931  | -2.55 |
| 2831 | 10 | Q998R8       | R.DSDSEEDLVSYGT   | DS[166.9984]EEDLVSYGTGL        | 3 | 0.947  | 0.006    | -0.007    | 1 | 29.81 | 20 | 30  | 2  | 931  | -2.55 |
| 4979 | 17 | Q998T8_Q8IUI | K.GKFDYLLETTGLA   | GKFDYLLETTGLADPGAVASMFV        | 4 | -0.11  | 0.019    | -0.002    | 1 | 21.55 | 17 | 22  | 1  | 366  | -0.36 |
| 2393 | 6  | Q998Z2       | K.SISREPSALPNLD   | SIS[166.9984]REPS[166.9984]    | 3 | 0.254  | 0.029    | -0.004    | 0 | 23.9  | 21 | 24  | 1  | 755  | -1.82 |
| 1051 | 8  | Q998E2       | R.VTHPDPPTER      | VTHPDPPTER                     | 2 | -0.65  | 0.021    | -0.00E-04 | 0 | 23.86 | 20 | 24  | 1  | 394  | -0.77 |
| 1172 | 5  | Q998J8       | R.LTSPFENR.F      | LTSPFENR[166.9984]PFENR        | 2 | -0.726 | 0.03     | -0.002    | 0 | 22.1  | 19 | 22  | 2  | 1104 | -1.98 |
| 1045 | 7  | Q998Q5       | R.GIITDSFGR.H     | GIITDS[166.9984]FGR            | 2 | 0.329  | 0.002    | -0.002    | 0 | 34.55 | 21 | 35  | 1  | 444  | -1.63 |
| 3309 | 6  | Q998T0       | K.YPLCSADAAVSTP   | YPLC[160.0307]SADAAVSTT[18     | 3 | 0.703  | 0.011    | -0.005    | 0 | 25.43 | 18 | 66  | 14 | 2240 | -1.63 |
| 2816 | 33 | Q998T0       | R.QEAIPOLEDSPVSI  | QEAIP[166.9984]PVEDS[166.9984] | 3 | 1.686  | 0.001    | -0.007    | 0 | 37.26 | 20 | 66  | 14 | 2240 | -2.6  |
| 2736 | 29 | Q998T0       | R.QEAIPOLEDSPVSI  | QEAIP[166.9984]PVEDS[166.9984] | 3 | 1.881  | 7.20E-04 | -0.007    | 0 | 39.21 | 20 | 66  | 14 | 2240 | -2.47 |
| 4188 | 9  | Q998T0       | K.HDSSAPDPAPSDA   | HDS[166.9984]APDPAPSDA         | 4 | -0.143 | 0.049    | 0.006     | 0 | 19.26 | 19 | 66  | 14 | 2240 | 1.35  |
| 4188 | 32 | Q998T0       | K.HDSSAPDPAPSDA   | HDS[166.9984]APDPAPSDA         | 4 | 0.126  | 0.026    | 0.006     | 0 | 21.95 | 19 | 48  | 7  | 2240 | 1.35  |
| 2736 | 17 | Q998T0       | R.QEAIPOLEDSPVSI  | QEAIP[166.9984]PVEDS[166.9984] | 3 | 1.908  | 6.80E-04 | -0.007    | 0 | 39.43 | 20 | 91  | 10 | 2240 | -2.47 |
| 4188 | 14 | Q998T0       | K.HDSSAPDPAPSDA   | HDS[166.9984]APDPAPSDA         | 4 | -0.092 | 0.03     | 0.006     | 0 | 21.4  | 19 | 74  | 15 | 2240 | 1.35  |
| 3309 | 12 | Q998T0       | K.YPLCSADAAVSTP   | YPLC[160.0307]SADAAVSTT[181    | 3 | 1.668  | 5.60E-04 | -0.005    | 0 | 38.39 | 18 | 79  | 9  | 2240 | -1.63 |
| 2022 | 12 | Q998T6       | R.DFLSDSEDPSPAS   | DFLSDSEDPSPAS[166.9984]P       | 2 | 0.019  | 0.005    | -0.003    | 0 | 31.55 | 21 | 32  | 1  | 254  | -1.62 |
| 1872 | 19 | Q998L3       | K.RPPESPPIVEEWS   | RPPESPPIVEEWS[166.9984]P       | 2 | 1.349  | 0.002    | -0.004    | 1 | 34.83 | 21 | 35  | 1  | 118  | -1.85 |
| 1847 | 12 | Q998T6       | R.VAAAAGSGSPPG    | VAAAAGSGSP[166.9984]PGS        | 3 | 1.41   | 6.20E-04 | -0.004    | 0 | 40.35 | 21 | 84  | 4  | 479  | -2.02 |
| 2132 | 11 | Q998T6       | R.VAAAAGSGSPPG    | VAAAAGSGSP[166.9984]PGS        | 3 | 1.472  | 2.50E-04 | -0.006    | 1 | 44.16 | 21 | 47  | 4  | 479  | -2.64 |
| 1847 | 7  | Q998T6       | R.VAAAAGSGSPPG    | VAAAAGSGSP[166.9984]P          | 2 | 0.49   | 0.002    | -0.004    | 0 | 36.19 | 21 | 36  | 2  | 479  | -2.07 |
| 1669 | 21 | Q998T1       | K.KLNSPEETAF      |                                |   |        |          |           |   |       |    |     |    |      |       |

|        |    |        |                                                    |   |        |          |           |   |       |    |     |    |      |       |
|--------|----|--------|----------------------------------------------------|---|--------|----------|-----------|---|-------|----|-----|----|------|-------|
| 1503.7 | 12 | Q9BXF6 | K.PLSAAPVVEGSPDRK PLSAAPVVEGS[166.9984]PDRK        | 3 | 0.949  | 0.006    | -0.003    | 1 | 30.89 | 21 | 74  | 7  | 653  | -2.04 |
| 2014.9 | 12 | Q9BXF6 | R.SNSSEAVLQGEEL SSNS[166.9984]SSEAVLQGEELSA        | 2 | 2.732  | 7.50E-06 | -0.004    | 0 | 58.9  | 20 | 74  | 7  | 653  | -1.86 |
| 2014.9 | 14 | Q9BXF6 | R.SNSSEAVLQGEEL SSNS[166.9984]EAVLQGEELSA          | 2 | 2.813  | 8.40E-06 | -0.004    | 0 | 58.39 | 20 | 58  | 8  | 653  | -1.86 |
| 2014.9 | 13 | Q9BXF6 | R.SNSSEAVLQGEEL SS[166.9984]NSSEAVLQGEELSA         | 2 | 2.774  | 8.70E-07 | -0.004    | 0 | 68.24 | 20 | 92  | 7  | 653  | -1.86 |
| 2014.9 | 12 | Q9BXF6 | R.SNSSEAVLQGEEL SSNS[166.9984]SEAVLQGEELSA         | 2 | 1.83   | 7.80E-05 | -0.004    | 0 | 48.69 | 20 | 71  | 6  | 653  | -1.86 |
| 1294.5 | 7  | Q9BXF6 | R.TYSDEANQMR.V TYS[166.9984]DEANQMR                | 2 | -0.689 | 0.028    | -0.002    | 0 | 21.42 | 18 | 135 | 10 | 653  | -1.18 |
| 1450.6 | 9  | Q9BXF6 | R.TYSDEANQMR.V RYS[166.9984]DEANQMR                | 2 | -0.843 | 0.035    | -0.003    | 1 | 20.9  | 19 | 92  | 7  | 653  | -1.88 |
| 1959.9 | 7  | Q9BXK5 | K.SPATSFLVDEEL SS[166.9984]PATSLFVDEELVI           | 2 | 0.48   | 0.002    | -0.002    | 0 | 36.16 | 21 | 38  | 3  | 485  | -1.04 |
| 1626.7 | 8  | Q9BXK5 | R.EESLVEELSPASEK K EESLVEELS[166.9984]PASEK        | 2 | -0.08  | 0.007    | -0.003    | 0 | 30.53 | 21 | 31  | 3  | 485  | -1.82 |
| 1233.6 | 7  | Q9BXS9 | R.PVPDPSVSVTR.L PVPDS[166.9984]PVSVTR              | 2 | -0.538 | 0.02     | -0.002    | 0 | 24.98 | 20 | 34  | 3  | 759  | -2.03 |
| 1426.6 | 5  | Q9BXS9 | R.PVPDPSVSVTR.L PVPDS[166.9984]PVS[166.9984]       | 2 | -0.417 | 0.014    | -0.002    | 1 | 27.19 | 21 | 34  | 3  | 759  | -1.61 |
| 1233.6 | 8  | Q9BXS9 | R.PVPDPSVSVTR.L PVPDPSV[166.9984]VTR               | 2 | -0.238 | 0.01     | -0.002    | 0 | 27.88 | 20 | 37  | 2  | 759  | -2.03 |
| 986.4  | 5  | Q9BX00 | R.EVSMVVEGR.V EVS[166.9984]MVEGR                   | 2 | -0.916 | 0.045    | -0.002    | 0 | 19.17 | 18 | 19  | 1  | 1053 | -1.48 |
| 1944.9 | 16 | Q9BY44 | R.SDKSPDLAPTAPQ.SDKS[166.9984]PDLAPTAPQS           | 3 | 1.831  | 8.20E-04 | -0.004    | 1 | 39.66 | 21 | 61  | 3  | 585  | -1.93 |
| 1944.9 | 10 | Q9BY44 | R.SDKSPDLAPTAPQ.S[166.9984]DKSPDLAPTAPQS           | 3 | 0.966  | 0.006    | -0.004    | 1 | 30.99 | 21 | 60  | 5  | 585  | -1.93 |
| 2684.1 | 9  | Q9BY67 | K.GADDAADADTAII GADDAADADTAIIAEGGQNS               | 3 | 0.12   | 0.041    | -8.00E-04 | 1 | 21.6  | 20 | 22  | 2  | 442  | -0.28 |
| 2556   | 9  | Q9BY67 | K.GADDAADADTAII GADDAADADT[181.014]AIINAE          | 3 | 1.394  | 8.00E-04 | -0.007    | 0 | 37.84 | 19 | 38  | 2  | 442  | -2.9  |
| 2369   | 8  | Q9BY89 | R.LSSLQTEPTSAGD.LSS[166.9984]LSSQTEPTSAGDC         | 2 | 0.961  | 5.90E-04 | -0.005    | 0 | 39.92 | 20 | 56  | 5  | 1806 | -1.94 |
| 2902.4 | 11 | Q9BY89 | R.EDSTLALAVGSEPL EDSTLALAVGSEPLATPAS[166.9984]     | 3 | 1.235  | 0.003    | -0.009    | 0 | 32.71 | 20 | 56  | 5  | 1806 | -2.99 |
| 2923.3 | 32 | Q9BY89 | K.DRQLSQEVTPADLE DRQLS[166.9984]QEVTPADLEC         | 3 | 1.969  | 5.50E-04 | -0.006    | 1 | 41.04 | 21 | 69  | 4  | 1806 | -2    |
| 2902.4 | 13 | Q9BY89 | R.EDSTLALAVGSEPL EDSTLALAVGSEPLATPAS[166.9984]     | 3 | 2.45   | 1.70E-04 | -0.009    | 0 | 44.85 | 20 | 60  | 4  | 1806 | -2.99 |
| 2164.9 | 19 | Q9BYG3 | K.TVDSQGPVCTPT TVDSQGP[181.014]PVC[160.02]         | 2 | -0.293 | 0.009    | -0.009    | 0 | 29.38 | 22 | 29  | 1  | 293  | -4.25 |
| 1126.5 | 7  | Q9BYG3 | K.VSGTLDTPK.T VSGTLD[181.014]PK                    | 2 | -0.007 | 0.006    | -0.002    | 0 | 30.29 | 20 | 30  | 1  | 293  | -1.83 |
| 1912.8 | 16 | Q9BYN0 | R.GAPEGPGSGGAQ.GAPEGPGSGGAQGS[166.9984]            | 2 | 0.714  | 0.001    | -0.002    | 0 | 37.43 | 20 | 37  | 1  | 137  | -0.87 |
| 967.45 | 6  | Q9BYW2 | R.LNDSPTLK.K LND[166.9984]PTLK                     | 2 | -0.721 | 0.027    | -0.002    | 0 | 23.15 | 20 | 23  | 4  | 2564 | -2.36 |
| 1871.8 | 12 | Q9BYW2 | K.MEIGDTLTAEISS MEIGDTLTAEISS[166.9984]PP          | 2 | 1.558  | 1.40E-04 | -0.005    | 0 | 46.84 | 21 | 47  | 4  | 2564 | -2.56 |
| 1718.6 | 20 | Q9BYX2 | R.AVSEGCASEDEVEG AVSEGC[160.0307]AS[166.9984]      | 2 | 1.81   | 7.90E-05 | -0.004    | 0 | 45.39 | 17 | 45  | 3  | 928  | -2.31 |
| 1954.7 | 10 | Q9BYX2 | R.RAVSEGCASEDEVEG RAVS[166.9984]EGC[160.0307]      | 2 | 0.339  | 0.002    | -0.005    | 1 | 29.72 | 16 | 30  | 2  | 928  | -2.76 |
| 2387.1 | 21 | Q9BZ95 | R.NEKPQTQSVSPAT.NEKPQTQSVS[166.9984]PATSC          | 3 | 2.452  | 2.00E-04 | -0.005    | 1 | 45.88 | 21 | 46  | 2  | 1437 | -2.04 |
| 3075.3 | 19 | Q9BZ1F | K.SSESDTDTSERQDD SEESD[166.9984]ERQDD              | 3 | 1.264  | 0.003    | -0.014    | 1 | 32.98 | 20 | 33  | 2  | 889  | -4.47 |
| 1829.8 | 11 | Q9BZ16 | R.LGTSESLPCTAEISS LGTSES[166.9984]LPC[160.030]     | 2 | -0.06  | 0.006    | -0.002    | 0 | 29.71 | 20 | 30  | 1  | 878  | -0.96 |
| 1634.8 | 8  | Q9C0B5 | R.GVSGPEPPTAPYL GVGS[166.9984]PEPPTAPYLG           | 2 | 0.395  | 0.002    | -0.003    | 0 | 35.26 | 21 | 57  | 6  | 715  | -1.91 |
| 1656.7 | 9  | Q9C0B5 | R.GDSLKPTSAEISS RGS[166.9984]KPTSAEISSR            | 3 | 0.637  | 0.011    | -0.004    | 1 | 27.71 | 21 | 55  | 5  | 715  | -2.18 |
| 2910.2 | 22 | Q9C0C2 | R.SFGTRPLSGFSPES SFGTRPLS[166.9984]SFGSPPEA        | 3 | 1.922  | 6.80E-04 | -0.007    | 1 | 39.62 | 20 | 220 | 21 | 1729 | -2.28 |
| 2910.2 | 14 | Q9C0C2 | R.SFGTRPLSGFSPES SFGTRPLS[166.9984]SFGSPPEA        | 3 | 0.117  | 0.043    | -0.007    | 1 | 21.57 | 20 | 220 | 21 | 1729 | -2.28 |
| 1317.6 | 8  | Q9C0C2 | R.HNGSLSPGLEAR.D HNGSL[166.9984]PGLER              | 2 | -0.609 | 0.02     | -0.003    | 0 | 25.27 | 21 | 220 | 21 | 1729 | -2.34 |
| 2351   | 18 | Q9C0C2 | R.TEAQDLCRASPEPP TEAQDL[160.0307]RAS[166.9984]     | 3 | 2.341  | 2.60E-04 | -0.003    | 1 | 43.81 | 20 | 220 | 21 | 1729 | -1.2  |
| 2997.3 | 6  | Q9C0C2 | R.LDSDPPSPITEASEA LDS[166.9984]PPSP[166.9984]      | 3 | 0.258  | 0.027    | -0.003    | 0 | 23.98 | 21 | 220 | 21 | 1729 | -1.01 |
| 2997.3 | 6  | Q9C0C2 | R.LDSDPPSPITEASEA LDS[166.9984]PPSPITEAS[166.9984] | 3 | 0.643  | 0.011    | -0.003    | 0 | 27.83 | 21 | 220 | 21 | 1729 | -1.01 |
| 1589.6 | 8  | Q9C0C2 | R.SQEAADVQDWEFR.I S[166.9984]QEAADVQDWEFR          | 2 | 2.732  | 1.60E-06 | -7.00E-04 | 0 | 65.17 | 20 | 220 | 21 | 1729 | -2.43 |
| 1499.6 | 8  | Q9C0C2 | R.NRSAAEELAESK.S NRS[166.9984]AAEELAESK            | 2 | 0.326  | 0.002    | -0.002    | 0 | 34.62 | 21 | 220 | 21 | 1729 | -2.13 |
| 1103.6 | 6  | Q9C0C2 | R.VSGAGFSPSK.M VSGAGS[166.9984]PSSK                | 2 | -0.422 | 0.013    | -0.002    | 0 | 27.14 | 21 | 220 | 21 | 1729 | -2.35 |
| 1846.7 | 6  | Q9C0C2 | R.VPSSDEEVVEEPOS VPS[166.9984]S[166.9984]DEE       | 2 | 1.125  | 4.00E-04 | -0.004    | 0 | 39.61 | 18 | 220 | 21 | 1729 | -2.29 |
| 1766.9 | 9  | Q9C0C2 | R.VPSSDEEVVEEPOS VPS[166.9984]SDEEVVEEQSR          | 2 | -0.964 | 0.043    | -0.005    | 0 | 20.72 | 20 | 220 | 21 | 1729 | -2.9  |
| 2166   | 7  | Q9C0C2 | R.VESQEPPLAGSEPLI VESQEPPLAGSES[166.9984]PLPL      | 2 | 1.982  | 4.90E-06 | -0.005    | 0 | 61.57 | 21 | 201 | 13 | 1729 | -2.13 |
| 1377.6 | 9  | Q9C0C2 | R.ASPPEPPGESSR.V AS[166.9984]PEPPGESSR             | 2 | -0.645 | 0.022    | -0.003    | 0 | 23.86 | 20 | 201 | 13 | 1729 | -1.88 |
| 1067.5 | 5  | Q9C0C2 | R.GWSQEGPVK.S GWS[166.9984]QEGPVK                  | 2 | -0.877 | 0.037    | -0.002    | 0 | 20.54 | 19 | 201 | 13 | 1729 | -2.01 |
| 2160.9 | 7  | Q9C0C2 | R.ASRVPSDEEVVEE ASRVPS[166.9984]S[166.9984]        | 2 | 0.671  | 0.001    | -0.005    | 1 | 35.97 | 19 | 162 | 20 | 1729 | -2.54 |
| 2303   | 25 | Q9C0C2 | K.RDSLGAAYASQDANI RDSL[166.9984]LGAYASQDANEC       | 3 | 0.918  | 0.006    | -0.004    | 1 | 30.53 | 21 | 259 | 21 | 1729 | -1.97 |
| 2917.3 | 16 | Q9C0C2 | R.LDSDPPSPITEASEA LDS[166.9984]PPSPITEAS[166.9984] | 3 | 0.063  | 0.04     | -0.003    | 0 | 21.98 | 21 | 259 | 21 | 1729 | -1.97 |
| 2652.2 | 18 | Q9C0E8 | K.IPATEQNTQVIEKA.I PATEQNTQVIEKAS[166.9984]IC      | 3 | 0.206  | 0.029    | -0.007    | 1 | 23.41 | 21 | 23  | 3  | 428  | -2.58 |
| 3334.5 | 31 | Q9GZ7R | R.SPGKAAEASDALPD SPGKAAEASDALPDDT[181.014]         | 3 | 1.41   | 0.002    | -0.007    | 1 | 35.26 | 19 | 84  | 4  | 859  | -1.96 |
| 1643.6 | 10 | Q9GZ7R | K.AQAVSEEEEEEGK.AQAVS[166.9984]EEEEEEGK            | 2 | 1.978  | 7.20E-07 | -0.004    | 0 | 67.51 | 19 | 84  | 4  | 859  | -2.46 |
| 3334.5 | 8  | Q9GZ7R | R.SPGKAAEASDALPD SPGKAAEAS[166.9984]DALPDD         | 3 | 1.33   | 0.003    | -0.007    | 1 | 32.66 | 19 | 110 | 5  | 859  | -1.96 |
| 3334.5 | 27 | Q9GZ7R | R.SPGKAAEASDALPD S[166.9984]PGKAAEASDALPDD         | 3 | 1.201  | 0.004    | -0.007    | 1 | 31.35 | 19 | 80  | 3  | 859  | -1.96 |
| 2965.3 | 21 | Q9GZ7R | K.AEASDALPDVTI AEAS[166.9984]DALPDDVTIES           | 3 | 0.044  | 0.044    | -0.005    | 0 | 21.84 | 21 | 80  | 4  | 859  | -1.56 |
| 1293.6 | 7  | Q9H0D6 | R.NPSGQVQASNPR.C NS[166.9984]PSGQVQASNPR           | 2 | 1.429  | 1.70E-04 | -4.00E-04 | 0 | 45.65 | 21 | 88  | 6  | 950  | -0.31 |
| 1848.6 | 9  | Q9H0D6 | K.AEDSDSEPEEDNV AEDS[166.9984]DS[166.9984]E        | 2 | 0.474  | 0.002    | -0.004    | 0 | 30.1  | 15 | 88  | 6  | 950  | -2.07 |
| 1976.7 | 10 | Q9H0D6 | R.KAEDSDSEPEEDNV KAEDS[166.9984]DS[166.9984]       | 2 | 1.847  | 6.00E-05 | -0.005    | 1 | 44.83 | 16 | 88  | 6  | 950  | -2.42 |
| 2967.2 | 25 | Q9H0D6 | R.MQNSDPSPTSPTS.MQNSDPSPTS[166.9984]S[166.9984]    | 3 | 1.239  | 0.003    | -0.004    | 0 | 33.72 | 21 | 76  | 7  | 950  | -1.21 |
| 3278.4 | 20 | Q9H0E9 | K.TEASPEMMLSPSHG TEASPE[166.9984]MMLSPSHG          | 2 | 0.097  | 0.037    | -0.006    | 0 | 21.32 | 20 | 21  | 1  | 1235 | -1.79 |
| 3198.4 | 13 | Q9H0E9 | K.TEASPEMMLSPSHG T[181.014]EASPEMMLSPSHGSN         | 3 | 0.957  | 0.006    | -0.007    | 0 | 30    | 20 | 30  | 1  | 1235 | -2.14 |
| 3198.4 | 11 | Q9H0E9 | K.TEASPEMMLSPSHG TEAS[166.9984]PEMMLSPSHGS         | 3 | 1.333  | 0.002    | -0.007    | 0 | 33.73 | 20 | 34  | 1  | 1235 | -2.14 |
| 1631.6 | 19 | Q9H0G5 | K.VEENPDADSDFAI VEENPDAD[166.9984]DFDAK            | 2 | 1.978  | 1.30E-05 | -0.006    | 0 | 52.76 | 16 | 153 | 4  | 558  | -3.71 |
| 3024.1 | 16 | Q9H0G5 | K.VEENPDADSDFAI VEENPDAD[166.9984]DFDAK            | 2 | 0.294  | 0.025    | -0.009    | 1 | 19.34 | 16 | 153 | 4  | 558  | -3.1  |
| 2479   | 9  | Q9H0G5 | K.PSVFGNDSDDDD P[166.9984]DSDDDT                   | 3 | 0.888  | 0.007    | -0.001    | 0 | 28.28 | 19 | 153 | 4  | 558  | -0.43 |
| 2864.1 | 18 | Q9H0G5 | K.VEENPDADSDFAI VEENPDADSDFAK[166.9984]            | 3 | 0.902  | 0.006    | -0.012    | 1 | 28.36 | 19 | 152 | 4  | 558  | -4.3  |
| 1549.7 | 15 | Q9H1B7 | R.NSSPVPASVPGQ.NSS[166.9984]PVPASVPGQR             | 2 | -0.351 | 0.013    | -0.002    | 0 | 26.71 | 20 | 42  | 4  | 796  | -1.56 |
| 1576.7 | 17 | Q9H1B7 | R.KASPEPDSAEAGL KAS[166.9984]PEPDSAEAGLK           | 2 | 0.359  | 0.002    | -0.004    | 1 | 34.81 | 21 | 42  | 4  | 796  | -2.28 |
| 3252.2 | 18 | Q9H1C4 | R.VLEEDNSDESDAEG VLEEDNS[166.9984]DESDAEGE         | 3 | 1.243  | 0.003    | -0.006    | 0 | 30.83 | 18 | 108 | 6  | 597  | -1.92 |
| 4263.7 | 14 | Q9H1C4 | R.VLEEDNSDESDAEG VLEEDNS[166.9984]DES[166.9984]    | 3 | 0.038  | 1.40E-04 | -0.012    | 1 | 43.96 | 18 | 108 | 6  | 597  | -2.91 |
| 3332.2 | 22 | Q9H1C4 | R.VLEEDNSDESDAEG VLEEDNS[166.9984]DES[166.9984]    | 3 | 1.41   | 1.50E-05 | -0.007    | 0 | 52.5  | 17 | 108 | 6  | 597  | -2.18 |
| 4183.7 | 15 | Q9H1C4 | R.VLEEDNSDESDAEG VLEEDNS[166.9984]DESDAEGE         | 4 | 0.038  | 0.004    | -0.01     | 1 | 29.79 | 19 | 108 | 6  | 597  | -2.51 |
| 4183.7 | 13 | Q9H1C4 | R.VLEEDNSDESDAEG VLEEDNS[166.9984]DAEGE            | 4 | -0.066 | 0.043    | -0.01     | 1 | 20    | 19 | 93  | 3  | 597  | -2.51 |
| 4263.7 | 17 | Q9H1C4 | R.VLEEDNSDESDAEG V[243.0297]LEEDNSDES[166.9984]    | 4 | 0.246  | 6.70E-04 | -0.012    | 1 | 37.2  | 18 | 83  | 5  | 597  | -2.91 |
| 2004.8 | 19 | Q9H1E3 | K.TPSPKEEPEEPSP TSPSPKEEPEES[166.9984]PPE          | 2 | 2.052  | 4.40E-05 | -0.004    | 1 | 51.88 | 21 | 293 | 13 | 243  | -2.05 |
| 3000.2 | 21 | Q9H1E3 | K.VVDYQFQESDDAI VVDYQFQES[166.9984]DDADI           | 3 | 1.41   | 3.50E-05 | -0.007    | 1 | 51.47 | 19 | 293 | 13 | 243  | -2.26 |
| 2317.9 | 9  | Q9H1E3 | K.VVDYQFQESDDAI VVDYQFQES[166.9984]DDADI           | 3 | 1.41   | 0.001    | -0.004    | 0 | 34.61 | 19 | 293 | 13 | 243  | -1.76 |
| 2508.8 | 11 | Q9H1E3 | K.DSGSDEDFLMEDDI DSGSDEDFLMEDDD[166.9984]          | 2 | 0.206  | 0.004    | -0.004    | 0 | 28.42 | 16 | 293 | 13 | 243  | -1.61 |
| 2937.1 | 12 | Q9H1E3 | R.EMLMEDVSEEEQ EMLMEDVGS[166.9984]EEQEI            |   |        |          |           |   |       |    |     |    |      |       |

|         |    |             |                                               |        |        |          |          |       |       |      |     |     |       |       |
|---------|----|-------------|-----------------------------------------------|--------|--------|----------|----------|-------|-------|------|-----|-----|-------|-------|
| 1743.7  | 6  | Q9H4G0      | R.GACSTPDMQFEP' GAC[160.0307]ST[181.014]PJ2   | -0.228 | 0.009  | -0.003   | 0        | 27.08 | 19    | 141  | 16  | 881 | -1.83 |       |
| 2475    | 10 | Q9H4G0      | R.APESDITGDEDDQD APES[166.9984]DTGDEDDQDEI    | 0.462  | 0.002  | -0.005   | 1        | 34.93 | 20    | 131  | 21  | 881 | -1.91 |       |
| 3556.5  | 15 | Q9H4G0      | K.GAPSDQDESGGIE GAPSDQDESGGIEDSPDRGAC[1       | 1.599  | 0.001  | -0.01    | 1        | 36.35 | 20    | 131  | 21  | 881 | -2.76 |       |
| 894.47  | 11 | Q9H4G0      | R.SLSPIIG.K.D SLS[166.9984]PIIGK              | 2      | 0.451  | 0.002    | -0.001   | 0     | 25.84 | 21   | 130 | 16  | 881   | -1.55 |
| 1512.7  | 13 | Q9H4G0      | R.SEAEEGVEVRTPTK.I SEAEVEGVRT[181.014]PTK     | 2      | -0.391 | 0.014    | -0.003   | 1     | 37.42 | 21   | 130 | 16  | 881   | -1.74 |
| 3556.5  | 15 | Q9H4G0      | K.GAPSDQDESGGIE GAPSDQDESGGIEDSPDRGAC[1       | 1.345  | 0.002  | -0.01    | 1        | 33.78 | 20    | 122  | 12  | 881 | -2.76 |       |
| 1383.8  | 8  | Q9H4G0      | R.RLPSPASPSPK.G RLPSPAS[166.9984]PAS[166.9984 | 2      | -0.857 | 0.039    | -0.003   | 1     | 20.72 | 19   | 144 | 16  | 881   | -2.09 |
| 1321.5  | 6  | Q9H4G0      | K.DYSEADGLSER.T DYSEADGLS[166.9984]ER         | 2      | 0.284  | 0.003    | -0.002   | 0     | 32.13 | 19   | 144 | 16  | 881   | -1.48 |
| 1743.7  | 17 | Q9H4G0      | R.GACSTPDMQFEP' GAC[160.0307]ST[181.014]PJ2   | -0.493 | 0.017  | -0.003   | 0        | 24.46 | 19    | 149  | 17  | 881 | -1.83 |       |
| 1147.5  | 6  | Q9H4G0      | R.LPSSPASPSPK.G LPSSPAS[166.9984]PSPK         | 2      | 1.385  | 2.40E-04 | -0.002   | 0     | 44.16 | 20   | 131 | 21  | 881   | -1.88 |
| 1383.6  | 9  | Q9H4G0      | R.RLPSPASPSPK.G RLPSPAS[166.9984]PAS[166.99   | 2      | 0.713  | 0.001    | -0.003   | 1     | 36.35 | 19   | 146 | 16  | 881   | -1.94 |
| 2350.9  | 22 | Q9H4L4      | K.NHLSPQQGGATPQ.NHLS[166.9984]PQQGGATPQV      | 3      | 0.464  | 0.017    | -0.005   | 0     | 24.99 | 20   | 25  | 2   | 574   | -2    |
| 1397.6  | 7  | Q9H4L5      | R.QDSWEVVEGLR.G QDS[166.9984]WEVVEGLR         | 2      | -0.633 | 0.025    | -0.002   | 0     | 23.98 | 20   | 24  | 6   | 887   | -1.27 |
| 1967.9  | 9  | Q9H4L5      | R.LHSSPNLSTLDFGI.LHSS[166.9984]NPNLSTLDFGEE   | 3      | 1.251  | 0.003    | -0.002   | 0     | 33.86 | 21   | 34  | 7   | 887   | -1.13 |
| 3699.7  | 18 | Q9H4L7      | K.IEEAPEATPQPSQP.IEEAPEATPQPSQP[166.99:3      | 3      | 1.41   | 0.002    | -0.004   | 0     | 34.92 | 20   | 35  | 6   | 1026  | -1.13 |
| 3699.7  | 25 | Q9H4L7      | K.IEEAPEATPQPSQP.IEEAPEATPQPSQP[166.9984]QP   | 3      | 0.792  | 0.008    | -0.004   | 0     | 28.28 | 20   | 34  | 5   | 1026  | -1.13 |
| 3699.7  | 22 | Q9H4L7      | K.IEEAPEATPQPSQP.IEEAPEATPQPSQP[166.998       | 3      | 0.56   | 0.014    | -0.004   | 0     | 25.93 | 20   | 31  | 4   | 1026  | -1.13 |
| 2964.3  | 16 | Q9H4L7      | R.GIQYDLSDDSEDAV.GIQYDLSDDSD[166.9984]EDVVS   | 3      | 0.064  | 0.047    | -0.008   | 0     | 20.98 | 20   | 56  | 4   | 1026  | -2.6  |
| 2663.1  | 8  | Q9H4L7      | K.DTVIIVSEPEDEES.DTVIIVS[166.9984]EPS[166.99  | 3      | 0.124  | 0.043    | -0.006   | 0     | 21.6  | 20   | 54  | 5   | 1026  | -2.36 |
| 3779.6  | 8  | Q9H4L7      | K.IEEAPEATPQPSQP.IEEAPEATPQPSQP[166.9984]I    | 3      | 0.064  | 0.044    | 0.006    | 0     | 21.04 | 20   | 50  | 6   | 1026  | 1.62  |
| 3089.3  | 11 | Q9H501      | K.ALAEEASEELPSDV.ALAEEAS[166.9984]EELPSDVS    | 3      | 1.664  | 0.001    | -0.006   | 0     | 37.04 | 20   | 37  | 5   | 851   | -1.81 |
| 3169.3  | 25 | Q9H501      | K.ALAEEASEELPSDV.ALAEEAS[166.9984]EELPS[166   | 3      | 1.28   | 0.002    | -0.003   | 0     | 33.16 | 20   | 34  | 9   | 851   | -1.01 |
| 2622.1  | 8  | Q9H510      | K.VEAVISDEETDVC.VEAVISDEET[181.014]DVSDEC     | 3      | 0.939  | 0.006    | -0.003   | 0     | 29.72 | 20   | 30  | 2   | 574   | -1.19 |
| 1865.9  | 18 | Q9H694      | R.LSDPELATESPLAI.LS[166.9984]DPELATESPLADI    | 2      | 0.778  | 9.70E-04 | -0.003   | 0     | 39.04 | 21   | 39  | 4   | 974   | -1.69 |
| 2320    | 23 | Q9H694      | K.VLSANHGDPISQTS.VLSANHGDPISQTS[181.014]G     | 3      | 0.199  | 0.043    | -0.006   | 0     | 23.39 | 21   | 23  | 4   | 974   | -2.4  |
| 897.46  | 4  | Q9H694      | K.SNRVT.LK.M SNRVT[181.014]LK                 | 2      | -0.157 | 0.008    | 4.00E-04 | 1     | 28.74 | 20   | 73  | 6   | 974   | 0.41  |
| 2635.2  | 11 | Q9H6F5      | R.ALVEFESNPEETREP.ALVEFESNPEETREPGS[166.9984  | 3      | 1.488  | 0.002    | -0.005   | 0     | 36.28 | 21   | 232 | 12  | 360   | -1.76 |
| 2383.1  | 16 | Q9H6F5      | R.LQQGAGLESPOGQ.LQQGAGLESPOGQPEPGAAS[16       | 2      | 1.978  | 3.80E-09 | -0.005   | 0     | 91.62 | 20   | 232 | 12  | 360   | -2.3  |
| 2463.1  | 24 | Q9H6F5      | R.LQQGAGLESPOGQ.LQQGAGLES[166.9984]PQGPQ      | 3      | 2.145  | 4.00E-04 | -0.006   | 0     | 41.85 | 20   | 232 | 12  | 360   | -2.4  |
| 1188.6  | 8  | Q9H6F5      | R.AGLGSPERPPK.T AGLGSP[166.9984]PERPPK        | 2      | -0.047 | 0.005    | -0.002   | 1     | 29.89 | 20   | 232 | 12  | 360   | -1.97 |
| 2635.2  | 12 | Q9H6F5      | R.ALVEFESNPEETREP.ALVEFESNPEET[181.014]REP    | 3      | 1.485  | 0.002    | -0.005   | 1     | 36.19 | 21   | 238 | 8   | 360   | -1.76 |
| 2681.1  | 12 | Q9H6F5      | R.QQDLHLESPOQRI.QQDLHLES[166.9984]PQRIPEY     | 4      | -0.077 | 0.047    | -0.005   | 1     | 21.89 | 21   | 283 | 12  | 360   | -1.93 |
| 1864.9  | 20 | Q9H6F5      | R.LGGLRPESPELTSV.LGGLRPES[166.9984]PELTSVSI   | 3      | 2.701  | 1.30E-05 | -0.003   | 1     | 56.26 | 20   | 283 | 12  | 360   | -1.85 |
| 2518    | 12 | Q9H6H4      | R.AGGLDSDTDECE.AGGLDSD[166.9984]DTEDEC[1      | 2      | 2.732  | 5.50E-07 | -0.006   | 0     | 69.75 | 20   | 103 | 5   | 257   | -2.26 |
| 1063.4  | 5  | Q9H6H4      | R.SFSMQDLR.S SFS[166.9984]MQDLR               | 2      | -0.018 | 0.005    | -0.002   | 0     | 29.18 | 19   | 103 | 5   | 257   | -1.8  |
| 2597.9  | 11 | Q9H6H4      | R.AGGLDSDTDECE.AGGLDSD[166.9984]DTEDEC[1      | 2      | -0.955 | 0.047    | -0.004   | 0     | 18.71 | 18   | 112 | 4   | 257   | -1.43 |
| 2597.9  | 16 | Q9H6H4      | R.AGGLDSDTDECE.AGGLDSD[166.9984]DT[181.01     | 2      | 2.085  | 3.10E-05 | -0.003   | 0     | 50.77 | 18   | 112 | 4   | 257   | -1.04 |
| 2518    | 9  | Q9H6H4      | R.AGGLDSDTDECE.AGGLDSD[181.014]EDEC[16        | 2      | 2.863  | 2.80E-07 | -0.006   | 0     | 72.72 | 20   | 104 | 3   | 257   | -2.26 |
| 2518    | 10 | Q9H6H4      | R.AGGLDSDTDECE.AGGLDSD[166.9984]EELPS[166     | 3      | 0.92   | 5.50E-04 | -0.006   | 0     | 39.59 | 20   | 104 | 3   | 257   | -2.54 |
| 1817.7  | 21 | Q9H6S0      | R.VDGINPDSSEMI.VDGINPDS[166.9984]DSEMI        | 2      | 0.82   | 8.60E-04 | -0.006   | 0     | 35.56 | 17   | 36  | 5   | 1430  | -3.4  |
| 2013.8  | 11 | Q9H6S0      | R.KSSADTFESDCTF.KSS[166.9984]ADTFESDCTF[16    | 2      | 1.103  | 3.90E-04 | -0.004   | 1     | 40.32 | 19   | 73  | 5   | 1430  | -2.09 |
| 1817.7  | 7  | Q9H6S0      | R.VDGINPDSSEMI.VDGINPDS[166.9984]EMEL         | 2      | 0.556  | 0.002    | -0.006   | 0     | 32.87 | 17   | 72  | 3   | 1430  | -3.4  |
| 2258.9  | 9  | Q9H6X2      | K.EVPPPPAESEEDDI.EVPPPPAES[166.9984]EEDDI     | 2      | -0.954 | 0.045    | -0.006   | 0     | 21.77 | 21   | 27  | 5   | 564   | -2.74 |
| 2387    | 9  | Q9H6X2      | K.EVPPPPAESEEDDI.EVPPPPAES[166.9984]EEDDI     | 2      | -0.354 | 0.013    | -0.005   | 1     | 26.75 | 20   | 37  | 6   | 564   | -2.07 |
| 2803    | 22 | Q9H6Y2      | R.TCEERPAEDGSEDEI.TC[160.0307]EERPAEDGS[166   | 3      | 1.41   | 8.90E-05 | -0.007   | 1     | 46.31 | 18   | 46  | 1   | 383   | -2.47 |
| 1399.6  | 8  | Q9H788      | R.TLSSAQEDIIR.W.TLSSAQEDIIR                   | 2      | 1.797  | 7.90E-05 | -0.002   | 0     | 49.33 | 21   | 49  | 3   | 454   | -1.31 |
| 1636.7  | 9  | Q9H7F0      | K.LVHDSLEDLQMT.R.LVHDS[166.9984]LEDLQMT       | 2      | 1.217  | 2.90E-04 | -0.003   | 0     | 43.53 | 21   | 44  | 1   | 1226  | -1.67 |
| 2207.7  | 9  | Q9H7L9      | R.GRESDEDTASEI.GRES[166.9984]DDEI[181.014     | 2      | -0.67  | 0.027    | -0.004   | 1     | 18.66 | 15   | 32  | 4   | 328   | -1.89 |
| 2443.1  | 11 | Q9H7L9      | R.RPASPSPHELPATF.RPASPSP[166.9984]PATF[166.99 | 3      | 0.631  | 0.012    | -0.005   | 1     | 27.71 | 21   | 32  | 4   | 328   | -2.19 |
| 2207.7  | 9  | Q9H7L9      | R.GRESDEDTASEI.GRES[166.9984]DDEI[181.014     | 2      | -0.204 | 0.009    | -0.004   | 1     | 23.29 | 15   | 23  | 2   | 328   | -1.89 |
| 2128    | 10 | Q9H7N4      | R.QRSPSPAPAPAPA.QRSPSPAPAPAPA[166.9984]P      | 2      | -0.897 | 0.043    | -0.005   | 1     | 22.39 | 21   | 147 | 12  | 1312  | -2.4  |
| 4140.8  | 31 | Q9H7N4      | K.AAPPPALTPDSQT.AAPPPALTPDSQTVDS[166.99       | 4      | 0.038  | 0.022    | -0.009   | 1     | 22.46 | 18   | 147 | 12  | 1312  | -2.08 |
| 1742.7  | 9  | Q9H7N4      | R.EVLVYDSEGLSGER.EVLVYD[166.9984]EGLS[166.99  | 2      | -0.633 | 0.02     | -0.004   | 0     | 23.03 | 19   | 147 | 12  | 1312  | -2.03 |
| 1417.5  | 5  | Q9H7N4      | K.GAETSWSGEER.A.GAETSWS[166.9984]GEER         | 2      | 0.151  | 0.004    | -0.003   | 0     | 29.87 | 18   | 147 | 12  | 1312  | -1.92 |
| 2741.2  | 19 | Q9H7N4      | R.FDIYDFPHPTDEAY.FDIYDFPHPTDEAYS[166.9984]F   | 3      | 1.544  | 6.30E-04 | -0.004   | 0     | 39.77 | 20   | 150 | 10  | 1312  | -1.46 |
| 2434.1  | 16 | Q9H7N4      | K.EAASSSGTQPAPP.EAASSSGTQPAPPAPAS[166.99      | 3      | 2.631  | 7.80E-05 | -0.006   | 1     | 49.61 | 21   | 112 | 10  | 1312  | -2.38 |
| 2434.1  | 17 | Q9H7N4      | K.EAASSSGTQPAPP.EAASSSGTQPAPPAPAS[166.99      | 3      | 1.544  | 7.80E-05 | -0.006   | 1     | 49.61 | 21   | 150 | 10  | 1312  | -2.38 |
| 1742.7  | 9  | Q9H7N4      | R.EVLVYDSEGLSGER.EVLVY[243.0297]DSEGLS[166.99 | 2      | -0.932 | 0.04     | -0.004   | 0     | 20.21 | 19   | 112 | 10  | 1312  | -2.08 |
| 4140.8  | 21 | Q9H7N4      | K.AAPPPALTPDSQT.AAPPPALTPDS[166.9984]QT[1     | 4      | 0.15   | 0.009    | -0.009   | 1     | 26.14 | 18   | 119 | 9   | 1312  | -2.03 |
| 2118.9  | 9  | Q9H7N4      | K.AAPPPALTPDSQT.AAPPPALTPDSQTV[181.014]P      | 2      | -0.02  | 0.006    | -0.005   | 0     | 31.02 | 21   | 135 | 9   | 1312  | -2.52 |
| 1863.9  | 11 | Q9H8G2      | K.SVNEILGLAESPMNE.SVNEILGLAES[166.9984]PNEP   | 2      | 1.529  | 1.50E-04 | -0.004   | 0     | 47.65 | 22   | 102 | 2   | 361   | -2.16 |
| 2336.8  | 9  | Q9H8G2      | K.LEGDNMGDSMDME.LEGDNMGDS[166.9984]DME        | 2      | 1.978  | 1.80E-07 | -0.005   | 0     | 72.38 | 18   | 102 | 2   | 361   | -2.09 |
| 1863.9  | 12 | Q9H8G2      | K.SVNEILGLAESPMNE.SVNEILGLAES[166.9984]PNEP   | 2      | 1.374  | 8.0E-06  | -0.003   | 0     | 61.84 | 22   | 152 | 4   | 361   | -1.73 |
| 2394.1  | 17 | Q9H8Y8      | R.VGDSTVPSEKPSVA.VGDST[181.014]VSEKPSVA       | 2      | 0.636  | 0.001    | -0.006   | 1     | 36.69 | 20   | 37  | 1   | 452   | -2.04 |
| 3356.5  | 25 | Q9H914      | R.GPPEDRAEPQPGQ.GPPEDRAEPQPGS[166.9984]F      | 3      | 2.572  | 1.80E-06 | -0.007   | 1     | 65.57 | 21   | 80  | 6   | 1324  | -2.6  |
| 1828.13 | 13 | Q9H914      | R.DSALAEPEGLSPAI.DSALAEPEGLS[166.9984]P       | 2      | 0.109  | 0.004    | -0.004   | 0     | 32.45 | 21   | 80  | 6   | 1324  | -2.37 |
| 2390    | 20 | Q9HAN9      | K.LEASDCHDQNSP.LEASD[160.0307]DQNS[16         | 3      | 0.458  | 0.017    | -0.01    | 1     | 25.92 | 21   | 29  | 1   | 279   | -4    |
| 1588.6  | 11 | Q9HAS0      | K.ELESSEEGSAAER.I.ELESSEEGSAAER               | 2      | 1.978  | 2.50E-07 | -0.003   | 0     | 72.25 | 19   | 72  | 1   | 296   | -1.81 |
| 1793.8  | 17 | Q9HAV7      | K.NSGQNLLEDMGQS.NSGQNLLEDMGQSEK               | 2      | 1.488  | 1.50E-04 | -0.006   | 0     | 46.24 | 21   | 76  | 1   | 217   | -3.13 |
| 2960.3  | 20 | Q9HAW4      | K.DLFETGLEDDNNSP.DLFETGLEDDNNS[166.9984]P     | 3      | 2.566  | 1.50E-04 | -0.003   | 0     | 47.02 | 21   | 47  | 4   | 1339  | -1.14 |
| 2373    | 15 | Q9HB58      | R.DKEDPQEMPHSP.LDKEDPQEMPHS[166.9984]P        | 3      | 0.389  | 0.023    | -0.008   | 1     | 25.29 | 21   | 25  | 2   | 689   | -3.26 |
| 1690.13 | 13 | Q9HB90_Q9NC | K.MSPNETLFLSTNK.MSPNETLFLS[166.9984]TNK       | 2      | -0.091 | 0.007    | -0.005   | 0     | 29.45 | 20   | 29  | 4   | 889   | -3.05 |
| 1690.12 | 12 | Q9HB90_Q9NC | K.MSPNETLFLSTNK.MSPNETLFLS[181.014]NK         | 2      | 1.405  | 2.20E-04 | -0.005   | 0     | 44.44 | 20   | 44  | 4   | 889   | -3.05 |
| 2170.15 | 5  | Q9HBL0      | K.EFAFEMEGTSPSSI.EFAFEMEGTSPSS[166.9984]P     | 2      | 1.677  | 1.20E-04 | -0.005   | 0     | 47.13 | 20   | 50  | 4   | 1735  | -2.37 |
| 1204.6  | 6  | Q9HBL0      | R.QGSPPTALPEK.R QGS[166.9984]PTALPEK          | 2      | -0.687 | 0.024    | -0.002   | 0     | 23.52 | 20   | 80  | 3   | 1735  | -1.85 |
| 2901.2  | 16 | Q9HBL0      | K.EFAFEMEGTSPSSI.EFAFEMEGTSPSS[166.9984]P     | 2      | 1.472  | 2.20E-04 | -0.008   | 1     | 45.04 | 21   | 96  | 6   | 1735  | -2.83 |
| 1987.9  | 9  | Q9HBL0      | R.AASDGGQYENQSP.EAAS[166.9984]GGQYENQSPA      | 2      | 2.08   | 2.70E-07 | -0.005   | 0     | 73.44 | 20   | 80  | 3   | 1735  | -2.31 |
| 2977.2  | 15 | Q9HBM0      | R.MCYQCESEDEQAI.MCYQCESEDEQAI[160.0307]E      | 3      | 0.213  | 0.032    | -0.007   | 0     | 20.48 | 18   | 20  | 3   | 779   | -2.99 |
| 3539.5  | 21 | Q9HC35      | K.APVSTSTVIGQNTF.APVSTSTVIGQNTF[181.014]P     | 3      | 1.315  | 0.003    | -0.007   | 0     | 32.55 | 19   | 33  | 2   | 991   | -1.95 |
| 3658.6  | 26 | Q9HC78      | R.DSQAEPTQEQAAI.DSQAEPTQEQAAEAPAGGQ[1         | 3      | 1.41   | 1.40E-05 | -0.007   | 0     | 54.4  | 18</ |     |     |       |       |

|        |    |             |                                                            |        |          |           |   |       |    |     |    |      |       |
|--------|----|-------------|------------------------------------------------------------|--------|----------|-----------|---|-------|----|-----|----|------|-------|
| 3571.5 | 20 | Q9NRE2      | K.MQSLSEAPNSDSL <sup>2</sup> MQSLSEAPNSDS[166.9984]LAP 3   | 0.037  | 0.047    | -0.016    | 1 | 19.72 | 19 | 20  | 8  | 1034 | -4.58 |
| 855.41 | 6  | Q9NRG9      | R.FSPVLGR.A FS[166.9984]PVLGR 2                            | -0.458 | 0.016    | -0.002    | 0 | 25.73 | 20 | 26  | 1  | 546  | -2.02 |
| 2139.8 | 8  | Q9NRL2      | K.ELDDQMVTEDEDD ELDQDMVT[181.014]EDEDDPG 2                 | 0.297  | 0.002    | -0.005    | 0 | 30.33 | 17 | 67  | 8  | 1556 | -2.34 |
| 3950.7 | 26 | Q9NRM1      | K.GNQPYSNTPAGLK GNQPYS[166.9984]NTPAGLQ 4                  | 0.022  | 0.037    | 0.012     | 1 | 22.01 | 20 | 22  | 2  | 1142 | 2.94  |
| 1481.6 | 6  | Q9NRX5      | R.SDGSLEDGDVHVR SDGS[166.9984]LEDGDVHVR 2                  | -0.848 | 0.04     | -0.003    | 0 | 19.88 | 18 | 20  | 1  | 453  | -2.11 |
| 1659.7 | 6  | Q9NRY4      | R.TSFVSGDELGPPIF TSFVSG[166.9984]DDELGPPIR 2               | 0.048  | 0.005    | -0.005-04 | 0 | 30.77 | 20 | 31  | 6  | 1499 | -0.47 |
| 1536.7 | 10 | Q9NS56      | K.LQQQTVPADASPD <sup>2</sup> LQQQTVPADAS[166.9984]PDSK 2   | 0.544  | 0.002    | -0.002    | 0 | 36.8  | 21 | 37  | 3  | 1045 | -1.98 |
| 1367.6 | 8  | Q9NS91      | K.NLDQTEISPR.Q NLDQTEIS[166.9984]PR 2                      | 1.978  | 6.00E-06 | -0.004    | 0 | 60.39 | 21 | 60  | 1  | 495  | -2.59 |
| 1964.8 | 10 | Q9NT15      | K.EDILENEEQNSPPI EDILENEEQNS[166.9984]PPK 2                | 1.043  | 4.80E-04 | -0.004    | 1 | 40.79 | 20 | 217 | 12 | 1447 | -2.1  |
| 2036.8 | 11 | Q9NT15      | R.AESPESIAESTQSTI AES[166.9984]PESIAESTQSTI 2              | 0.68   | 0.001    | -0.005    | 0 | 36.16 | 19 | 217 | 12 | 1447 | -2.69 |
| 1956.8 | 17 | Q9NT15      | R.AESPESIAESTQSTI AES[166.9984]PESIAESTQSTI 3              | 0.687  | 0.01     | -0.004    | 0 | 27.27 | 20 | 217 | 12 | 1447 | -1.92 |
| 2942.1 | 13 | Q9NT15      | K.GRLDSEMDSHSENI GRLDS[166.9984]SEMDSH[166 3               | 0.459  | 0.019    | -0.006    | 1 | 23.99 | 19 | 217 | 12 | 1447 | -2.07 |
| 2942.1 | 24 | Q9NT15      | K.GRLDSEMDSHSENI GRLDS[166.9984]SEMDSH[166 3               | 0.413  | 0.022    | -0.006    | 1 | 23.49 | 19 | 210 | 16 | 1447 | -2.07 |
| 2862.2 | 12 | Q9NT15      | K.GRLDSEMDSHSENI GRLDSSEMDSH[166.9984]ENEC 3               | 1.668  | 6.30E-05 | -0.007    | 1 | 49.86 | 20 | 210 | 16 | 1447 | -2.54 |
| 1874.8 | 12 | Q9NT15      | R.METVSNASSSSNPS METVSNASSSSNPS[166.9984] 2                | 2.9    | 2.40E-06 | -0.005    | 0 | 64.91 | 21 | 180 | 14 | 1447 | -2.5  |
| 1956.8 | 10 | Q9NT15      | R.AESPESIAESTQSTI AESPES[166.9984]AIESTQSTI 3              | 0.553  | 0.013    | -0.004    | 0 | 25.89 | 20 | 180 | 14 | 1447 | -1.92 |
| 1971.8 | 17 | Q9NTJ3      | R.TESPATAAETASEEL TES[166.9984]PATAAETASEELD 3             | 0.453  | 0.02     | -0.003    | 0 | 24.89 | 20 | 25  | 3  | 1288 | -1.55 |
| 1971.8 | 12 | Q9NTJ3      | R.TESPATAAETASEEL TESPAT[181.014]AAETASEELDN 3             | 1.597  | 0.001    | -0.003    | 0 | 36.3  | 20 | 36  | 4  | 1288 | -1.55 |
| 4454.8 | 21 | Q9NU22      | K.EADDEGGGEPAD <sup>2</sup> EADDEGGGEPADQGFQOQEEI 4        | 0.038  | 0.015    | -0.013    | 1 | 24.73 | 19 | 33  | 7  | 5596 | -2.84 |
| 2236.9 | 20 | Q9NU22      | K.AEENTDQASQED <sup>2</sup> AEENTDQAS[166.9984]PQEDV 3     | 0.241  | 0.028    | -0.004    | 0 | 21.81 | 19 | 53  | 7  | 5596 | -1.84 |
| 2297.9 | 14 | Q9NU22      | K.NGGEDTNEEGEEI NGGED[181.014]DNEEGEENF 2                  | 1.123  | 4.10E-04 | -0.005    | 0 | 40.54 | 19 | 33  | 3  | 5596 | -2.38 |
| 2883.2 | 13 | Q9NUA8      | K.AETEEAAHSVQEN AETEEAAHSVQENSVNS[166.9 3                  | 1.85   | 7.90E-04 | -0.007    | 0 | 38.9  | 20 | 39  | 4  | 1239 | 0.9   |
| 2972.3 | 25 | Q9NUA8      | R.NAETPAETPTTAAE <sup>2</sup> NAETPAETPTTAAE[160.0307]S 3  | 0.081  | 0.042    | -0.005    | 0 | 21.16 | 20 | 31  | 8  | 1239 | -1.61 |
| 2265   | 20 | Q9NUE0      | K.DCEYQJSPGAALP DC[160.0307]EYQJSPGAALP 2                  | 1.976  | 6.10E-05 | -0.008    | 0 | 50.02 | 20 | 50  | 1  | 388  | -3.73 |
| 1605.7 | 14 | Q9NUL3      | K.GSSPTPCSPVQPS GSSPTPC[160.0307]S[166.99 2                | -0.917 | 0.039    | -0.004    | 0 | 22.19 | 21 | 22  | 3  | 570  | -2.15 |
| 1729.7 | 11 | Q9NVM6      | R.QAQAESEEEEEER QAQAE[166.9984]EEEEER 2                    | -0.811 | 0.036    | -0.003    | 0 | 21.18 | 19 | 21  | 1  | 304  | -1.5  |
| 2139.7 | 18 | Q9NVU0      | R.EAANEAGDSQDEE EAANEAGDS[166.9984]S[166.9 2               | -0.717 | 0.03     | -0.006    | 0 | 18.19 | 15 | 18  | 2  | 708  | -2.6  |
| 3780.5 | 30 | Q9NVU0      | R.IKEEVPSEEGEED <sup>2</sup> IKEEVPSEEGEEDQ 3              | 1.544  | 2.90E-04 | -0.007    | 1 | 42.17 | 19 | 42  | 3  | 708  | -1.76 |
| 3780.5 | 23 | Q9NVU0      | R.IKEEVPSEEGEED <sup>2</sup> IKEEVPSEEGEEDQEAEEEPMD 3      | 1.655  | 3.30E-04 | -0.007    | 1 | 41.71 | 19 | 61  | 4  | 708  | -1.76 |
| 2214   | 10 | Q9NVU7      | K.YEIDSDDEPRGELL <sup>2</sup> YEIDSD[166.9984]DEPRGELLSL 3 | 0.292  | 0.028    | -0.004    | 1 | 23.22 | 20 | 23  | 2  | 687  | -1.59 |
| 1679.7 | 15 | Q9NW82      | K.TMFAQVSDDEEAI TMFAQV[166.9984]DDEEAK 2                   | -0.66  | 0.023    | 0.003     | 0 | 22.76 | 19 | 23  | 2  | 654  | 1.61  |
| 1861.8 | 12 | Q9NW97      | R.ADVESPGNPPDR <sup>2</sup> ADVESPGNPPDRQNS[166.998 2      | -0.24  | 0.01     | -0.003    | 1 | 27.86 | 20 | 36  | 3  | 253  | -1.39 |
| 2554.2 | 17 | Q9NW97      | K.NVPPPSIEPLTPPC NVPPPSIEPLT[181.014]PPPQV 3               | 0.27   | 0.025    | -0.005    | 0 | 24.04 | 21 | 24  | 1  | 253  | -1.78 |
| 1405.7 | 7  | Q9NWH9      | K.SPGHMVILDQTK.G [166.9984]PGHMVILDQTK 2                   | 1.185  | 3.70E-04 | -0.003    | 0 | 43.18 | 21 | 63  | 5  | 1034 | -2.29 |
| 1338.6 | 6  | Q9NWH9      | K.DGQDAIAQSPKE.E DGQDAIAQ[166.9984]PEK 2                   | 2.085  | 3.70E-05 | -0.002    | 0 | 52.11 | 20 | 83  | 4  | 1034 | -1.34 |
| 2721.1 | 19 | Q9NWS9      | K.TEELGSPHSGTVI TEELG[166.9984]PHSGTVES 3                  | 0.888  | 0.007    | -0.006    | 0 | 29.28 | 20 | 52  | 3  | 450  | -2.28 |
| 2641.1 | 30 | Q9NWS9      | K.TEELGSPHSGTVI TEELG[166.9984]PHSGTVES 3                  | 1.499  | 0.002    | -0.006    | 0 | 36.32 | 21 | 65  | 4  | 450  | -2.41 |
| 2641.1 | 19 | Q9NWS9      | K.TEELGSPHSGTVI TEELGPHS[166.9984]GTVES 3                  | 0.976  | 0.005    | -0.006    | 0 | 31.12 | 21 | 60  | 2  | 450  | -2.41 |
| 2813.3 | 18 | Q9NWS9      | M.PSLGPPCLPVM <sup>2</sup> PS[166.9984]PLGPPC[160.0307] 3  | 0.025  | 0.045    | -0.003    | 0 | 21.58 | 21 | 65  | 4  | 450  | -1.21 |
| 1179.5 | 6  | Q9NWW5      | R.HGVSADAEEAR.T HG[166.9984]VSADAEEAR 2                    | 1.355  | 2.10E-04 | -0.005-04 | 0 | 41.91 | 18 | 42  | 1  | 311  | -0.67 |
| 2796.3 | 19 | Q9NX14      | K.RRPEPTTPWQEDPI RRPEPTTPWQEDPEPENLYEK 3                   | 0.724  | 0.01     | -0.004    | 1 | 28.64 | 21 | 29  | 2  | 153  | -1.42 |
| 1406.7 | 11 | Q9NX40      | K.KLENSPLGEALR.S KLENS[166.9984]PLGEALR 2                  | 2.197  | 3.60E-05 | -0.002    | 1 | 52.3  | 20 | 52  | 1  | 245  | -1.78 |
| 1655.7 | 11 | Q9NX63      | R.YSGAYGASVDEDELI YS[166.9984]GAYGASVDEELK 2               | 1.978  | 4.70E-07 | -0.003    | 0 | 70.23 | 20 | 70  | 2  | 227  | -1.86 |
| 2202   | 10 | Q9NX94      | R.SSTRPPSADPPDS <sup>2</sup> SSTRPPS[166.9984]IADPPDSL 3   | 0.17   | 0.038    | -0.004    | 1 | 22.04 | 20 | 22  | 1  | 342  | -1.83 |
| 1394.6 | 8  | Q9NXC5      | R.GFSQYGVSGSPTK. <sup>2</sup> GFSQYGVSGS[166.9984]PTK 2    | -0.491 | 0.018    | -0.003    | 0 | 24.31 | 19 | 24  | 3  | 875  | 3.3   |
| 2169.9 | 9  | Q9NXG2      | K.DQQPSGSEGEDDD DQQPS[166.9984]GSEGEDDDA 2                 | 1.16   | 3.60E-04 | -0.004    | 1 | 40.96 | 19 | 74  | 4  | 353  | -1.99 |
| 2249.8 | 11 | Q9NXG2      | K.DQQPSGSEGEDDD DQQPS[166.9984]GS[166.998 2                | 1.978  | 2.60E-05 | -0.005    | 1 | 50.75 | 17 | 74  | 4  | 353  | -2.11 |
| 2613   | 15 | Q9NXG2      | K.FTDKQQPSGSEGI FTDKQQPS[166.9984]GS[166 3                 | 0.507  | 0.016    | -0.006    | 1 | 33.4  | 18 | 53  | 4  | 353  | -2.37 |
| 2121.8 | 14 | Q9NXG2      | K.DQQPSGSEGEDDD DQQPS[166.9984]GS[166.998 2                | 0.868  | 6.60E-04 | -0.005    | 0 | 25.04 | 16 | 111 | 6  | 353  | -2.17 |
| 2056.9 | 17 | Q9NY27      | K.NHSDSSTSESEVSN <sup>2</sup> NHSDSSTSESEVSVS[166.998 3    | 0.133  | 0.04     | -0.005    | 0 | 22.73 | 21 | 71  | 4  | 417  | -2.65 |
| 1541.7 | 7  | Q9NYB0      | K.YLLGDAPVSPSQK YLLGDAPV[166.9984]PSSQK 2                  | 1.978  | 7.50E-06 | -0.002    | 0 | 59.27 | 21 | 59  | 1  | 399  | -1.62 |
| 1879.8 | 8  | Q9NYF8      | R.YSPQNSPIHHPISF YS[166.9984]PS[166.9984]QNS 3             | 0.014  | 0.049    | -0.004    | 0 | 20.54 | 20 | 305 | 18 | 920  | 0.9   |
| 2001.7 | 11 | Q9NYF8      | K.FNDSEGDDEETED FND[166.9984]EGDDEETEDY 2                  | 1.978  | 2.90E-09 | -0.005    | 0 | 88.21 | 15 | 305 | 18 | 920  | -2.42 |
| 1393.6 | 8  | Q9NYF8      | K.AEGEPQESPLK.S AEGEPQES[166.9984]PLK 2                    | 1.639  | 1.30E-04 | -0.003    | 0 | 45.75 | 19 | 305 | 18 | 920  | 0.9   |
| 1521.7 | 16 | Q9NYF8      | K.AEGEPQESPLK.S KAEGEPQES[166.9984]PLK 2                   | 1.978  | 3.40E-05 | -0.002    | 1 | 52.85 | 21 | 305 | 18 | 920  | -1.64 |
| 1081.5 | 7  | Q9NYF8      | R.IDISPSTLR.K IDIS[166.9984]PSTLR 2                        | 0.515  | 0.002    | -0.002    | 0 | 36.51 | 21 | 305 | 18 | 920  | -1.66 |
| 2111.8 | 20 | Q9NYF8      | R.AEGEWEDQEALDY AEGEWEDQEALDYFS[166.998 2                  | 1.755  | 9.00E-05 | -0.004    | 0 | 47.91 | 20 | 305 | 18 | 920  | -1.95 |
| 1411.6 | 6  | Q9NYF8      | K.DLFYDPPPLHK.N DLFYD[166.9984]PPLHK 2                     | 0.804  | 7.80E-04 | -0.002    | 0 | 38.4  | 20 | 305 | 18 | 920  | -1.45 |
| 2001.7 | 11 | Q9NYF8      | K.FNDSEGDDEETED FNDSEGD[181.014]EETEDYR 2                  | 1.978  | 5.90E-07 | -0.005    | 0 | 64.82 | 15 | 305 | 18 | 920  | -2.72 |
| 1989.8 | 16 | Q9NYF8      | K.DTFEHPDSEIDEP <sup>2</sup> DTFEHPDSEI[166.9984]DEFNK 3   | 0.275  | 0.025    | -0.004    | 0 | 23.11 | 20 | 329 | 21 | 920  | -2.89 |
| 2081.7 | 12 | Q9NYF8      | K.FNDSEGDDEETED FND[166.9984]EGDDEETEDY 2                  | 1.982  | 2.10E-05 | -0.006    | 0 | 47.37 | 13 | 329 | 21 | 920  | -1.67 |
| 2257.8 | 8  | Q9NYF8      | K.QKFNDSEGDDEETED QKFND[166.9984]EGDDEETED 2               | 1.703  | 1.10E-04 | -0.005    | 1 | 45.34 | 18 | 329 | 21 | 920  | -2.25 |
| 2160.9 | 13 | Q9NYF8      | K.SSATSGDIWPLGSA SATSGDIWPLGSAYDNS[166.95 2                | 0.529  | 0.002    | -0.004    | 0 | 35.5  | 20 | 319 | 18 | 920  | -1.74 |
| 2324.9 | 25 | Q9NYF8      | K.GRAEGEWEDQEAL GRAEGEWEDQEALDYFS[166.99 3                 | 0.891  | 0.006    | -0.004    | 1 | 30.24 | 21 | 319 | 18 | 920  | -1.59 |
| 2513   | 13 | Q9NYF8      | R.AEGEWEDQEALDY AEGEWEDQEALDYFS[166.998 3                  | 0.419  | 0.018    | -0.004    | 1 | 24.54 | 20 | 259 | 19 | 920  | -1.42 |
| 2160.9 | 7  | Q9NYF8      | K.SSATSGDIWPLGSA SATSGDIWPLGS[166.9984]AY 2                | -0.102 | 0.007    | -0.004    | 0 | 29.37 | 20 | 369 | 19 | 920  | -1.74 |
| 1879.8 | 5  | Q9NYF8      | R.YSPQNSPIHHPISF Y[243.0297]SPQNS[166.998 2                | -0.669 | 0.026    | -0.005    | 0 | 23.53 | 20 | 334 | 20 | 920  | -2.81 |
| 1301.6 | 13 | Q9NYF8      | K.STFREESPLR.I STFREES[166.9984]PLR 3                      | 0.282  | 0.03     | -0.003    | 1 | 22.16 | 19 | 334 | 20 | 920  | -2.41 |
| 1248.7 | 7  | Q9NYL2      | R.SSSPTQYGLTK.N SSS[166.9984]PTQYGLTK 2                    | -0.405 | 0.014    | -0.003    | 0 | 27.26 | 21 | 27  | 4  | 800  | -2.22 |
| 2012.9 | 20 | Q9NYL9      | K.DLDEDELLGNLSETE DLDEDELLGNLS[166.9984]ETEL 2             | 2.266  | 2.70E-05 | -0.004    | 0 | 54.02 | 21 | 54  | 1  | 352  | -2.04 |
| 2012.9 | 10 | Q9NYL9      | K.DLDEDELLGNLSETE DLDEDELLGNLSETE[181.014]ELK 2            | 2.675  | 1.10E-05 | -0.004    | 0 | 58.06 | 21 | 58  | 1  | 352  | -2.04 |
| 1464.7 | 8  | Q9NYM9      | R.AQSPGAVEEILDR.E AQ[166.9984]GAVEEILDR 2                  | -0.365 | 0.012    | -0.002    | 0 | 27.68 | 21 | 28  | 1  | 111  | -1.36 |
| 2224.9 | 12 | Q9NYV4      | K.QDQSPGASVGGD QDQSPGASVGGDYDLS[166.99 2                   | 1.736  | 8.90E-05 | -0.005    | 0 | 46.72 | 19 | 47  | 4  | 1490 | -2.31 |
| 1327.6 | 5  | Q9NYV4      | K.NSSPAPPQAPGK.N N[166.9984]PAPPQAPGK 2                    | -0.502 | 0.015    | -0.002    | 0 | 27.37 | 22 | 76  | 9  | 1490 | 0.9   |
| 1500.9 | 7  | Q9NZ18      | R.DQTPDENQVIVK.D QTPDENQVIVK 2                             | 0.187  | 0.004    | -0.003    | 0 | 33.18 | 21 | 33  | 1  | 577  | -1.97 |
| 1133.9 | 9  | Q9NZ18      | R.QGSPVAAGAPAK.C [166.9984]PVAAGAPAK 2                     | 1.682  | 1.00E-04 | -0.001    | 0 | 48.15 | 21 | 48  | 1  | 577  | -0.92 |
| 1364.7 | 9  | Q9NZM1      | K.GPVGTVSEALQAR.L GPVGTYS[166.9984]EAQLAR 2                | 2.278  | 2.70E-05 | -0.002    | 0 | 53.14 | 20 | 53  | 7  | 2061 | -1.73 |
| 1330.6 | 13 | Q9NZM1      | R.DYSLDEFEANK.I DYSLDEFEANK 2                              | -0.339 | 0.011    | -0.002    | 0 | 25.94 | 19 | 66  | 6  | 2061 | 1.6   |
| 2575   | 16 | Q9NZN4      | R.GPDEAMEDGEGGS GPDEAMEDGEGGS[166.9984]D 2                 | 1.853  | 8.00E-05 | -0.004    | 0 | 45.89 | 17 | 53  | 2  | 543  | -1.5  |
| 1474.6 | 8  | Q9NZN8      | R.TNSMSSGLSPNF TNSMSSGLS[166.9984]PNR 2                    | 0.011  | 0.006    | -0.003    | 0 | 29.4  | 19 | 29  | 1  | 540  | -1.95 |
| 1900.9 | 9  | Q9NZU0      | R.ETSFQMLPISNEPIS ETS[166.9984]FQMLPISNEPISK 2             | 0.236  | 0.003    | -0.003    | 0 | 32.62 | 20 | 67  | 3  | 649  | -1.67 |
| 1039.5 | 6  | Q9NZU0_Q9N2 | K.DNSILEIR.G DNS[166.9984]LEIR 2                           | 1.775  | 8.80E-05 | -0.002    | 0 | 49.06 | 21 | 74  | 7  | 1649 |       |

|         |    |             |                                                         |        |          |        |   |       |    |     |    |      |       |
|---------|----|-------------|---------------------------------------------------------|--------|----------|--------|---|-------|----|-----|----|------|-------|
| 2446.1  | 7  | Q9P2K5      | K.AEVPGATGGDPSPHI AEVPGATGGD[166.9984]PHLC 2            | 1.362  | 2.20E-04 | -0.004 | 0 | 44.98 | 21 | 63  | 3  | 600  | -1.58 |
| 1555.6  | 5  | Q9P2R3      | R.SDSWSLANLSSTK.E SDS[166.9984]WLSLANLS[166. 2          | -0.861 | 0.041    | 0.004  | 0 | 20.7  | 19 | 21  | 3  | 1169 | 2.78  |
| 1575.7  | 10 | Q9P2R6      | K.VASDTEEADRTSSK.VAS[166.9984]DTEADRTSSK 2              | -0.346 | 0.011    | -0.001 | 1 | 26.83 | 20 | 27  | 2  | 1566 | -0.75 |
| 3315.5  | 7  | Q9P2Y4      | R.VPSGETPPSPSQEG VPSGETPPS[166.9984]PSQEGE1 3           | 1.379  | 0.002    | -0.009 | 1 | 34.19 | 20 | 52  | 6  | 722  | -2.69 |
| 3395.4  | 15 | Q9P2Y4      | R.VPSGETPPSPSQEG VPS[166.9984]GETPPS[166.998 3          | 1.41   | 0.001    | -0.01  | 1 | 36.89 | 20 | 52  | 6  | 722  | -2.98 |
| 3395.4  | 16 | Q9P2Y4      | R.VPSGETPPSPSQEG VPSGET[181.014]PPS[166.998 3           | 2.831  | 4.20E-05 | -0.01  | 1 | 50.96 | 20 | 61  | 5  | 722  | -2.98 |
| 2452    | 25 | Q9TNN7_P042 | K.GGSCQAASSNSAC GGS[166.9984]C[160.0307]S[166.9984]Q. 3 | 1.766  | 8.90E-04 | -0.005 | 0 | 38.01 | 20 | 48  |    |      | -2.04 |
| 2452    | 12 | Q9TNN7_P042 | K.GGSCQAASSNSAC GGS[166.9984]C[160.0307]S[166.9984]Q. 3 | 1.519  | 0.002    | -0.005 | 0 | 35.62 | 20 | 101 |    |      | -2.04 |
| 1908.6  | 19 | Q9UB85      | R.AADTEEMDIEMDS AADTEEMDIEMDS[166.9984]G 2              | 0.592  | 0.001    | -0.004 | 0 | 33.28 | 17 | 33  | 2  | 411  | -2.22 |
| 3953.7  | 33 | Q9UB85      | R.CCPEQEEGESAAGC [160.0307]C[160.0307]PEQEE 3           | 0.739  | 0.01     | -0.005 | 0 | 27.72 | 20 | 57  | 2  | 411  | -1.36 |
| 3953.7  | 40 | Q9UB85      | R.CCPEQEEGESAAGC [160.0307]C[160.0307]PEQEE 3           | 1.374  | 1.80E-04 | -0.005 | 0 | 45    | 20 | 64  | 3  | 411  | -1.36 |
| 2783.1  | 28 | Q9UB89      | R.TTQSMQDFPVVDS TTQSMQDFPVVDS[166.9984]E1 3             | 0.138  | 0.038    | -0.006 | 0 | 21.78 | 20 | 22  | 1  | 837  | -2.13 |
| 1414.6  | 9  | Q9UBH6      | K.VLIEDTDEAENT.V LIEDT[181.014]DDEAENT 2                | -0.155 | 0.007    | -0.003 | 0 | 27.76 | 19 | 34  | 4  | 696  | -1.85 |
| 1060.6  | 6  | Q9UBH6      | K.YNQSISLR.R YNQS[166.9984]ISLR 2                       | -0.555 | 0.017    | -0.003 | 0 | 25.76 | 21 | 34  | 4  | 696  | -2.8  |
| 1056.4  | 7  | Q9UBM7      | K.SLDGVTNDR.T S[166.9984]LDGVTNDR 2                     | 0.004  | 0.005    | -0.002 | 0 | 27.35 | 17 | 27  | 1  | 475  | -2.13 |
| 3996.6  | 12 | Q9UBW7      | R.MNVAGDVFQNGE.MNVAGDVFQNGES[166.9984]Z 3               | 1.054  | 0.005    | -0.001 | 1 | 28.9  | 18 | 29  | 1  | 1377 | -0.29 |
| 1815.8  | 20 | Q9UER7      | K.DGDKSPMSSLQSN DGDGS[166.9984]PMSSLQJ5NE 2             | 0.31   | 0.002    | -0.004 | 1 | 34.46 | 21 | 48  | 2  | 740  | -2.21 |
| 2066.7  | 14 | Q9UEW8      | K.TEDGDWEWSDDEI TEDGDWEWSD[166.9984]DDEM 2              | 0.94   | 6.80E-04 | -0.005 | 0 | 32.62 | 13 | 33  | 2  | 545  | -2.22 |
| 1850.9  | 12 | Q9UEY8      | K.IEVLSPGSPSPSK.P IEVLSPGSPSPSK[166.9984]PS 3           | 0.208  | 0.003    | -0.005 | 1 | 34.3  | 22 | 34  | 2  | 706  | -2.64 |
| 1490.7  | 6  | Q9UFC0      | K.RPDDVPLSLPSK.R RPDDVPLSL[166.9984]PSK 2               | 1.788  | 8.90E-05 | -0.002 | 1 | 48.24 | 20 | 48  | 3  | 647  | -1.7  |
| 2673.1  | 21 | Q9UFC0      | K.RACASPAQVEGSP RAC[160.0307]AS[166.9984]PS 3           | 1.205  | 0.004    | -0.008 | 1 | 33.28 | 21 | 67  | 2  | 647  | -2.9  |
| 2673.1  | 27 | Q9UFC0      | K.RACASPAQVEGSP RAC[160.0307]ASPS[166.9984] 3           | 1.487  | 0.002    | -0.008 | 1 | 36.21 | 21 | 70  | 4  | 647  | -2.9  |
| 2437.1  | 10 | Q9UFC0      | R.ACASPAQVEGSPV AC[160.0307]AS[166.9984]PSA 2           | 2.863  | 4.90E-07 | -0.004 | 0 | 71.22 | 21 | 130 | 5  | 647  | -1.44 |
| 1856.8  | 10 | Q9UGH3      | K.SSLAETLDSTGSLDP SSLAETLDSTGS[166.9984]LDPQ 3          | 0.64   | 0.011    | -0.002 | 0 | 27.8  | 21 | 99  | 7  | 650  | -1.36 |
| 1936.8  | 11 | Q9UGH3      | K.SSLAETLDSTGSLDP SSLAETLD[166.9984]TGS[166. 3          | 0.561  | 0.013    | -0.003 | 0 | 26.94 | 21 | 66  | 5  | 650  | -1.68 |
| 1936.8  | 8  | Q9UGH3      | K.SSLAETLDSTGSLDP SSLAETLD[181.014]GS[166.9 3           | 0.663  | 0.01     | -0.003 | 0 | 27.98 | 21 | 78  | 5  | 650  | -1.68 |
| 1856.8  | 12 | Q9UGH3      | K.SSLAETLDSTGSLDP SSLAETLD[166.9984]TGS[166. 3          | 2.539  | 1.50E-05 | -0.004 | 0 | 56.61 | 21 | 88  | 6  | 650  | -1.9  |
| 1856.8  | 10 | Q9UGH3      | K.SSLAETLDSTGSLDP SSLAETLD[181.014]LDSTGSLDPQR 3        | 1.186  | 0.003    | -0.002 | 0 | 33.29 | 21 | 106 | 5  | 650  | -1.36 |
| 1936.8  | 9  | Q9UGH3      | K.SSLAETLDSTGSLDP SSLAETLD[166.9984]T[181.01 2          | 1.041  | 4.30E-04 | -0.004 | 0 | 41.72 | 21 | 84  | 5  | 650  | -2.04 |
| 1488.6  | 11 | Q9UGP4      | R.SNSGLGGEVSGVM SNS[166.9984]GLGGEVSGVMSI 2             | 1.843  | 6.70E-05 | -0.002 | 0 | 48.74 | 20 | 49  | 5  | 676  | -1.14 |
| 1829.11 | 11 | Q9UGU0      | R.LNASPAAREEATSP LNAS[166.9984]PAAREATS[16 2            | -0.284 | 0.01     | -0.003 | 1 | 28.45 | 21 | 28  | 5  | 1960 | -1.63 |
| 1570.7  | 9  | Q9UGU5      | K.SPPTMLLPASPAC.S [166.9984]PPTMLLPAS[166.5 2           | -0.614 | 0.019    | -0.002 | 0 | 25.17 | 21 | 25  | 2  | 601  | -1.43 |
| 1078.7  | 16 | Q9UHB6      | R.ETPHSPGVEDAPIA ETPHS[166.9984]PGVEDAPIA 3             | 0.153  | 0.039    | -0.004 | 0 | 22.93 | 21 | 24  | 3  | 759  | -2.23 |
| 1357.4  | 4  | Q9UHB7      | K.DLLPSPAGVPVPSK.L DLLPS[166.9984]PAGVPVPSK 2           | -0.649 | 0.025    | -0.002 | 0 | 23.84 | 20 | 24  | 4  | 1163 | -1.77 |
| 1078.4  | 5  | Q9UHB7      | R.MFSPMEEK.E MFS[166.9984]PMEEK 2                       | -0.716 | 0.029    | -0.002 | 0 | 20.15 | 17 | 20  | 8  | 1163 | -2.1  |
| 1897.11 | 11 | Q9UHD8      | R.SFEVEETPNSTPP.S [166.9984]FEVEETPNSTPPR 2             | 1.985  | 5.70E-08 | -0.005 | 0 | 80.47 | 21 | 80  | 1  | 586  | -2.49 |
| 2399    | 11 | Q9UHI7      | K.DQJAIPEPTPEITEI DQJAIPEPT[181.014]PEPTETAS 2          | 2.206  | 3.10E-05 | -0.005 | 0 | 53.39 | 21 | 53  | 2  | 598  | -2.16 |
| 2086.9  | 13 | Q9UHR4      | K.TPASTPVSGTQAS.T PASTPVSGT[181.014]TQAS[16 2           | 1.978  | 5.40E-06 | -0.005 | 0 | 61.03 | 21 | 81  | 5  | 511  | -2.25 |
| 3348.4  | 14 | Q9UHR4      | K.IHMNIEEIKTPASTI IHMNIEEIKTPAS[166.9984]T[1 3          | 1.246  | 0.003    | -0.004 | 1 | 32.79 | 20 | 75  | 6  | 511  | -1.06 |
| 2086.9  | 10 | Q9UHR4      | K.TPASTPVSGTQAS.T PASTPV[166.9984]GTQAS[16 2            | 0.486  | 0.002    | -0.005 | 0 | 36.15 | 21 | 67  | 7  | 511  | -2.25 |
| 3348.4  | 20 | Q9UHR4      | K.IHMNIEEIKTPASTI IHMNIEEIK[181.014]TPAS[166 3          | 0.954  | 0.006    | -0.004 | 1 | 29.89 | 20 | 67  | 7  | 511  | -1.06 |
| 2359.1  | 11 | Q9UHR4      | K.LLEENETAVTPTP.L LEENETAVTPTPS[166.9984] 2             | -0.816 | 0.037    | -0.005 | 0 | 22.13 | 20 | 67  | 7  | 511  | -2.1  |
| 1013.4  | 6  | Q9UHR5      | R.NMSPDEIK.I NMS[166.9984]PDEIK 2                       | -0.869 | 0.038    | -0.002 | 0 | 18.67 | 17 | 19  | 2  | 2    | -3.8  |
| 2153.9  | 11 | Q9UHW9      | R.LTISIGSDEDEETET.Y LTISIGS[166.9984]DEDEETETVQ. 2      | 2.43   | 1.90E-05 | -0.003 | 0 | 54.66 | 20 | 55  | 2  | 1150 | -1.41 |
| 2233.8  | 9  | Q9UHW9      | R.LTISIGSDEDEETET.Y LTISIGS[166.9984]IGS[166.9984]DI 2  | 1.985  | 1.50E-05 | -0.006 | 0 | 54.2  | 19 | 96  | 3  | 1150 | -2.67 |
| 1846.8  | 12 | Q9UIF9      | R.AGDPGEMPOSPQSGT AGDPGEMPOSPQ[181.014]GLG 2            | 2.058  | 4.90E-05 | -0.004 | 0 | 50.94 | 20 | 51  | 7  | 1905 | -2.17 |
| 1846.8  | 10 | Q9UIF9      | R.AGDPGEMPOSPQSGT AGDPGEMPO[166.9984]PTGU 2             | 1.776  | 9.50E-05 | -0.004 | 0 | 48.02 | 20 | 48  | 7  | 1905 | -2.17 |
| 1176.5  | 7  | Q9UIF9      | R.YSEGLSPSK.R YSEGLS[166.9984]PSK 2                     | -0.193 | 0.008    | -0.002 | 0 | 28.29 | 20 | 67  | 5  | 1905 | -1.61 |
| 3881.5  | 22 | Q9UIG0      | R.SDVQEESEGSDTDC SDVQEE[166.9984]EGS[166.9 3            | 1.41   | 5.00E-04 | -0.007 | 1 | 37.62 | 17 | 139 | 5  | 1483 | -1.92 |
| 1868.13 | 9  | Q9UIG0      | R.LAEDEGDESEPAVG LAEDEGDS[166.9984]EPAVGGQ 2            | 2.732  | 1.20E-06 | -0.004 | 0 | 66.7  | 20 | 139 | 5  | 1483 | -2.01 |
| 1630.6  | 9  | Q9UIG0      | K.DHTVSGDEYDPCR.D HTVS[166.9984]GDEYD[160 2             | 1.978  | 1.40E-05 | -0.003 | 0 | 52.51 | 17 | 139 | 5  | 1483 | -2.06 |
| 2384    | 18 | Q9UIG0      | K.FPDRLAEGDSEPF.PDRLAEGDGS[166.9984]EPE/ 3              | 1.91   | 5.80E-04 | -0.004 | 1 | 40.46 | 21 | 138 | 6  | 1483 | -1.8  |
| 3881.5  | 15 | Q9UIG0      | R.SDVQEESEGSDTDC SDVQEE[166.9984]EGSDT[181 3            | 1.655  | 1.70E-06 | -0.007 | 1 | 62.31 | 17 | 178 | 6  | 1483 | -1.92 |
| 1814.11 | 11 | Q9UI14      | R.LPSSSEMGSQDGS.L PS[166.9984]SSEMGSQDGS 2              | 1.103  | 3.90E-04 | -0.004 | 0 | 42.34 | 21 | 42  | 2  | 662  | -2.49 |
| 1814.11 | 11 | Q9UI14      | R.LPSSSEMGSQDGS.L PS[166.9984]SSEMGSQDGS 2              | 1.368  | 2.10E-04 | -0.004 | 0 | 45.01 | 21 | 45  | 2  | 662  | -2.49 |
| 3190.26 | 20 | Q9UIV9      | R.TDEVPAGGSRSEAE TDEVPAGGSR[166.9984]EAE 3              | 0.164  | 0.033    | -0.006 | 1 | 23.04 | 21 | 23  | 1  | 622  | -2.01 |
| 3017.5  | 20 | Q9UIX5      | K.IKEEVSEAEANQC.I KEEVSE[166.9984]EAEANQQA 3            | 0.328  | 0.023    | -0.008 | 1 | 20.68 | 17 | 21  | 1  | 808  | -2.51 |
| 3017.5  | 22 | Q9UIX5      | K.IKEEVSEAEANQC.I KEEVSE[166.9984]EAEANQQA 3            | 0.824  | 0.007    | -0.008 | 1 | 25.64 | 17 | 26  | 2  | 808  | -2.51 |
| 3550.4  | 34 | Q9UIX6      | K.TDPASLETGQDSED TDPASLETGQDS[166.9984]EDD 3            | 1.41   | 1.10E-04 | -0.008 | 0 | 47.16 | 20 | 47  | 1  | 822  | -2.29 |
| 3550.4  | 15 | Q9UIX6      | K.TDPASLETGQDSED TDPASLET[181.014]GQDSEDD 3             | 1.051  | 0.005    | -0.008 | 0 | 30.87 | 20 | 55  | 2  | 822  | -2.29 |
| 1594.7  | 7  | Q9UIZ1      | K.APVPGTDPDLSGSS.A PVPGT[181.014]PDLSGSSR 2             | -0.462 | 0.014    | -0.005 | 0 | 26.69 | 21 | 27  | 1  | 356  | -2.99 |
| 1394.11 | 11 | Q9UK58      | K.AEEKSPISINVK.T AEEKS[166.9984]PISINVK 2               | 0.828  | 7.10E-04 | -0.003 | 1 | 40.64 | 22 | 51  | 7  | 526  | -1.25 |
| 937.48  | 5  | Q9UK58      | K.SPISINVK.T S[166.9984]PISINVK 2                       | -0.52  | 0.018    | -0.002 | 0 | 25.11 | 20 | 62  | 6  | 526  | -2.82 |
| 2751.13 | 13 | Q9UK58      | K.GLNPDGTPALSTG.G LNPDGTPALSTGGFS[166.998 3             | 0.041  | 0.043    | -0.005 | 1 | 21.77 | 21 | 62  | 7  | 526  | -1.84 |
| 1705.7  | 16 | Q9UK76      | R.RNSSEASSGDFLDL.R NS[166.9984]SEASSGDFLDL 3            | 0.118  | 0.041    | -0.004 | 1 | 22.58 | 21 | 67  | 3  | 526  | -2.2  |
| 1705.7  | 15 | Q9UK76      | R.RNSSEASSGDFLDL.R NS[166.9984]SEASSGDFLDL 3            | 1.367  | 0.002    | -0.004 | 1 | 35.03 | 21 | 72  | 4  | 154  | -2.2  |
| 1549.6  | 8  | Q9UK76      | R.RNSSEASSGDFLDL.R NS[166.9984]SEASSGDFLDL 3            | 1.916  | 5.80E-05 | -0.002 | 0 | 49.49 | 20 | 105 | 5  | 154  | -1    |
| 1593.8  | 18 | Q9UKJ3      | R.KPVSVEEVQATPNK.K PS[166.9984]VSEEVQATPNK 2            | 2.57   | 1.30E-05 | -0.004 | 1 | 57.06 | 21 | 74  | 6  | 1502 | -2.24 |
| 4676    | 20 | Q9UKJ3      | R.GEEQEQSETEGPP.G EEEQEQSETEGPPGSS[166.998 4            | 0.031  | 0.037    | -0.004 | 0 | 20    | 18 | 74  | 6  | 1502 | -0.76 |
| 1607.8  | 17 | Q9UKJ3      | R.GKPEPPGSGSPAP.G KPEPPGSGS[166.9984]PAPP 3             | 0.857  | 0.007    | -0.004 | 1 | 29.97 | 21 | 74  | 6  | 1502 | -2.7  |
| 1607.8  | 7  | Q9UKJ3      | R.GKPEPPGSGSPAP.G KPEPPG[166.9984]GSPAPP 2              | -0.306 | 0.011    | -0.004 | 1 | 28.2  | 21 | 83  | 6  | 1502 | -2.39 |
| 2778.1  | 20 | Q9UKJ3      | K.ATGPSSQNSNITG.C ATGPSSQNSNITGRGS[166.998 3            | 0.137  | 0.038    | -0.007 | 1 | 20.7  | 19 | 83  | 6  | 1502 | -2.44 |
| 3607.4  | 30 | Q9UKM9      | R.TRDDGDEEGLLTHS.T RDDGDEEGLLTHS[166.9984]E1 3          | 1.41   | 3.60E-04 | -0.007 | 1 | 41.28 | 19 | 90  | 7  | 306  | -1.99 |
| 3687.4  | 15 | Q9UKM9      | R.TRDDGDEEGLLTHS.T RDDGDEEGLLTHS[181.014]HSEE 3         | 1.41   | 2.30E-04 | -0.007 | 1 | 42.07 | 18 | 90  | 7  | 306  | -1.76 |
| 3350.20 | 20 | Q9UKM9      | R.DDGDDEEGLLTHS.DDGDDEEGLLTHS[166.9984]EEL 3            | 1.849  | 7.00E-04 | -0.009 | 0 | 38.85 | 20 | 117 | 8  | 306  | -2.71 |
| 3767.4  | 25 | Q9UKM9      | R.TRDDGDEEGLLTHS.T RDDGDEEGLLTHS[181.014]HSEE 3         | 0.767  | 0.009    | -0.009 | 1 | 24.03 | 16 | 117 | 8  | 306  | -2.37 |
| 3767.4  | 16 | Q9UKM9      | R.TRDDGDEEGLLTHS.T RDDGDEEGLLTHS[166.9984]E1 3          | 0.106  | 0.043    | -0.009 | 1 | 17.39 | 16 | 119 | 11 | 306  | -2.37 |
| 3607.4  | 19 | Q9UKM9      | R.TRDDGDEEGLLTHS.T RDDGDEEGLLTHS[181.014]HSEE 4         | 0.124  | 0.031    | -0.007 | 1 | 21.9  | 19 | 119 | 11 | 306  | -1.99 |
| 3687.4  | 24 | Q9UKM9      | R.TRDDGDEEGLLTHS.T RDDGDEEGLLTHS[166.9984]E1 3          | 1.472  | 6.10E-05 | -0.007 | 1 | 47.74 | 18 | 122 | 8  | 306  | -1.76 |
| 3687.4  | 11 | Q9UKM9      | R.TRDDGDEEGLLTHS.T RDDGDEEGLLTHS[181.014]HSEE 3         | 0.828  | 0.008    | -0.007 | 1 | 26.63 | 18 | 61  | 7  | 306  | -1.76 |
| 3767.4  | 15 | Q9UKM9      | R.TRDDGDEEGLLTHS.T RDDGDEEGLLTHS[181.014]HSEE 3         | 0.483  | 0.018    | -0.009 | 1 | 21.18 | 16 | 61  | 7  | 306  | -2.37 |
| 3687.4  | 28 | Q9UKM9      | R.TRDDGDEEGLLTHS.T RDDGDEEGLLTHS[166.9984]E1 3          |        |          |        |   |       |    |     |    |      |       |

|         |    |             |                                                    |   |        |          |          |   |       |    |     |    |      |       |
|---------|----|-------------|----------------------------------------------------|---|--------|----------|----------|---|-------|----|-----|----|------|-------|
| 1693.8  | 8  | Q9UL3       | K.TEPSSPLSDPSDIIR. TEPSS[166.9984]PLSDPSDIIR       | 2 | -0.201 | 0.009    | -0.003   | 0 | 29.3  | 21 | 29  | 3  | 1066 | -1.61 |
| 2787.1  | 13 | Q9ULL5      | K.KQETAACVCGTDEE KQETAACV[160.0307]GET[181.1]      | 3 | 0.746  | 0.01     | -0.007   | 1 | 25.82 | 18 | 26  | 4  | 1215 | -2.48 |
| 2787.1  | 14 | Q9ULL5      | K.KQETAACVCGTDEE KQET[181.014]AAVC[160.0307]       | 3 | 1.472  | 5.80E-04 | -0.007   | 1 | 38.16 | 18 | 28  | 5  | 1215 | -2.48 |
| 2204    | 19 | Q9ULL5      | K.RNLETLPSFSSDEED RNLETLPSFSS[166.9984]DEEDS       | 2 | 1.272  | 0.003    | -0.006   | 1 | 34.07 | 21 | 34  | 8  | 1215 | -2.83 |
| 1221.5  | 7  | Q9UL0       | K.DGSGFEGGLTM.K DGSG[166.9984]FEGGLTMK             | 2 | 0.187  | 0.004    | -0.002   | 0 | 31.23 | 19 | 31  | 1  | 858  | -1.58 |
| 1203.5  | 7  | Q9ULU4      | K.LNFDMTASPK.I LNFDMTAS[166.9984]PK                | 2 | 0.302  | 0.002    | -0.002   | 0 | 34.38 | 21 | 34  | 5  | 1186 | -1.52 |
| 1434.7  | 12 | Q9ULW0      | K.SSDQPLTVPSVPK.F SSDQPLTVPS[166.9984]PK           | 2 | 0.153  | 0.004    | -0.003   | 0 | 32.89 | 21 | 33  | 1  | 747  | -1.96 |
| 3575.4  | 28 | Q9ULW3      | K.AATEQPLEGTEQI.AATEQPLEGTEQI[166.9984]EQQEES      | 3 | 0.424  | 0.02     | -0.012   | 0 | 23.64 | 19 | 24  | 2  | 272  | -3.33 |
| 1999.8  | 19 | Q9ULX3      | R.KDDSDDDGGGW1I.KDDSDDDGGGW1[166.9984]DDGGGW1P     | 2 | -0.662 | 0.024    | -0.004   | 1 | 24.74 | 21 | 25  | 2  | 412  | -2.09 |
| 362.4   | 21 | Q9UM01      | M.VDSTEYEVASQPE.VDST[181.014]EYEVAS[166.998]       | 3 | 1.642  | 0.001    | -0.011   | 0 | 37.78 | 21 | 73  | 5  | 511  | -3.38 |
| 3282.5  | 33 | Q9UM01      | M.VDSTEYEVASQPE.VDSTEYEVASQPEVET[181.014]          | 3 | 1.472  | 3.90E-05 | -0.008   | 0 | 52.09 | 21 | 96  | 5  | 511  | -2.42 |
| 3282.5  | 20 | Q9UM01      | M.VDSTEYEVASQPE.VDSTEYEVAS[166.9984]QPEVET         | 3 | 1.544  | 1.00E-04 | -0.008   | 0 | 47.85 | 21 | 48  | 3  | 511  | -2.42 |
| 3282.5  | 22 | Q9UM01      | M.VDSTEYEVASQPE.VDST[181.014]EYEVASQPEVET          | 3 | 0.53   | 0.014    | -0.009   | 0 | 26.65 | 21 | 96  | 5  | 511  | -2.88 |
| 362.4   | 15 | Q9UM01      | M.VDSTEYEVASQPE.VDST[166.9984]EYEVAS[166.998]      | 3 | 1.394  | 4.10E-04 | -0.011   | 0 | 41.87 | 21 | 91  | 4  | 511  | -3.38 |
| 3493.5  | 21 | Q9UM01      | -M.VDSTEYEVASQPE.MVDS[166.9984]TEY[243.0297]       | 3 | 1.125  | 0.004    | -0.016   | 0 | 31.6  | 20 | 96  | 5  | 511  | -4.65 |
| 1624.8  | 11 | Q9UMZ2      | R.QLSLEGGSLGVEDLI.QLS[166.9984]LEGGSLGVEDLK        | 2 | -0.102 | 0.006    | -0.002   | 0 | 31.2  | 22 | 31  | 3  | 1314 | -1.5  |
| 3550.3  | 20 | Q9UN86      | R.YEYEVFGDSEPELDI.YEYEVFGDSEPELDI[166.9984]EPELDEE | 3 | 1.668  | 2.70E-05 | -0.009   | 0 | 47.98 | 15 | 48  | 1  | 482  | -2.51 |
| 1951.9  | 18 | Q9UN86      | K.STTPPAEPVSLPQI.S[166.9984]STTPPAEPVSLPQEP        | 2 | -0.643 | 0.023    | -0.004   | 0 | 23.9  | 20 | 39  | 2  | 482  | -2.01 |
| 1758.7  | 10 | Q9UNE0      | K.SENDASSENEQLLSI.SENDASSE[166.9984]ENEQLLSR       | 2 | 1.274  | 2.80E-04 | -0.006   | 0 | 42.13 | 19 | 42  | 2  | 448  | -3.27 |
| 1787.10 | 10 | Q9UNL2      | K.QQSEDLLOQDFSR.QQS[166.9984]EDLLOQDFSR            | 2 | 0.458  | 0.002    | 5.00E-04 | 0 | 35.87 | 21 | 36  | 1  | 185  | 0.26  |
| 1871.7  | 9  | Q9UN51      | R.QLSDDEEQEEDG.QLSD[166.9984]DEEQEEDGR             | 2 | 1.982  | 1.10E-06 | -0.002   | 0 | 66.1  | 19 | 66  | 6  | 1208 | -2.68 |
| 959.48  | 6  | Q9UNX3_P612 | K.DDEVVV.R.G DDEVVV.R                              | 2 | -0.375 | 0.014    | -0.002   | 0 | 25.54 | 19 | 26  |    |      | -1.94 |
| 2816.1  | 19 | Q9UNX4      | K.GSSPGIQDLEAED.GSS[166.9984]PGIQDLEAEDG           | 3 | 1.41   | 0.002    | -0.007   | 0 | 36.84 | 21 | 37  | 2  | 943  | -2.42 |
| 2816.1  | 17 | Q9UNX4      | K.GSSPGIQDLEAED.GSS[166.9984]PGIQDLEAEDG           | 3 | 1.394  | 0.001    | -0.007   | 0 | 38.44 | 21 | 38  | 2  | 943  | -2.41 |
| 2085.8  | 14 | Q9UNZ2      | R.DLIHQDQDEDEEEE.DLIHQDQDEDEEEGQR                  | 3 | 0.094  | 0.043    | 0.01     | 0 | 21.28 | 20 | 21  | 1  | 370  | 4.89  |
| 2036.8  | 11 | Q9UP55      | R.LESLYDEEDESAVG.LESLY[166.9984]DEEDESAVGA         | 2 | 1.978  | 1.80E-05 | -0.005   | 0 | 54.52 | 20 | 55  | 3  | 1085 | -2.28 |
| 2235.9  | 7  | Q9UPP1      | K.DAEYIYPSLESDDI.DAEYIYPSLE[166.9984]DDDDF         | 2 | 0.005  | 0.005    | -0.004   | 0 | 31.41 | 21 | 31  | 2  | 1060 | -2    |
| 1997    | 15 | Q9UPQ0      | K.PKSPPEATLTFPFLI.PKS[166.9984]PEEATLTFPFLDI       | 3 | 0.861  | 0.007    | -0.001   | 1 | 29.01 | 20 | 39  | 4  | 1083 | -0.51 |
| 1191.6  | 5  | Q9UPQ0      | R.QTPSPDVLR.G QTPS[166.9984]PDVLR                  | 2 | -0.854 | 0.04     | -0.002   | 0 | 20.79 | 19 | 30  | 8  | 1083 | -1.71 |
| 1661.9  | 7  | Q9UPQ0      | R.ASVLDTMSMAGSGS.ASVLDTMSMAGSGS[166.9984]P         | 2 | -0.805 | 0.032    | -0.004   | 0 | 23.24 | 21 | 61  | 5  | 1083 | -2.65 |
| 1476.6  | 9  | Q9UPQ0      | K.SINHQIESPSER.R.SINHQIES[166.9984]PSER            | 2 | -0.919 | 0.044    | -0.003   | 0 | 23.2  | 22 | 30  | 4  | 1083 | -2.05 |
| 2194.9  | 17 | Q9UPQ0      | R.HSHTPENLSSFLNDF.S[166.9984]HSTPENLSSFLNDFP       | 3 | 0.24   | 0.031    | -0.004   | 0 | 23.73 | 21 | 59  | 8  | 1083 | -1.75 |
| 1514.7  | 7  | Q9UPQ0      | R.SRQTPSPDVLR.G SRQT[181.014]P[166.9984]PC         | 2 | -0.767 | 0.031    | -0.003   | 1 | 23.55 | 21 | 23  | 6  | 1083 | -2.04 |
| 1838.7  | 17 | Q9UPQ0      | R.GSSDRGRSDESDEL.GSSDRGRS[166.9984]DSESDEL         | 3 | 1.195  | 0.003    | -0.004   | 1 | 31.35 | 19 | 64  | 9  | 1083 | -2.01 |
| 2009.8  | 11 | Q9UPQ0      | K.DDEEPPGWEESPQI.DDEEPPGWEESPQI[166.9984]PQSI      | 2 | 1.73   | 9.90E-05 | -0.005   | 0 | 47.66 | 20 | 48  | 4  | 1833 | -2.68 |
| 2414.1  | 11 | Q9UPR8      | K.TGSGSPFAGNSPAR.TGSGSPFAGNS[166.9984]PARE         | 3 | 0.484  | 0.018    | -0.005   | 1 | 26.17 | 21 | 46  | 6  | 1303 | -1.93 |
| 2821.2  | 28 | Q9UPR8      | K.PGPAEAPSPATSPSI.PGPAEAPSP[181.014]ASPSGD         | 3 | 0.591  | 0.013    | -0.006   | 0 | 27.26 | 21 | 51  | 5  | 1303 | -2.11 |
| 2901.1  | 17 | Q9UPR8      | K.PGPAEAPSPATSPSI.PGPAEAPSP[181.014]AS[166.998]    | 3 | 0.273  | 0.026    | -0.005   | 0 | 23.08 | 20 | 32  | 5  | 1303 | -1.72 |
| 2494    | 10 | Q9UPR8      | K.TGSGSPFAGNSPAR.TGSGSPFAGNS[166.9984]P            | 2 | -0.76  | 0.034    | -0.005   | 1 | 22.69 | 20 | 73  | 7  | 1303 | -1.88 |
| 2821.2  | 19 | Q9UPR8      | K.PGPAEAPSPATSPSI.PGPAEAPSP[166.9984]P             | 3 | 0.298  | 0.026    | -0.006   | 0 | 24.38 | 21 | 24  | 6  | 1303 | -2.11 |
| 1385.6  | 9  | Q9UPR8      | K.TGSGSPFAGNSPAR.TGSGSPFAGNS[166.9984]PAR          | 2 | -0.72  | 0.027    | -0.003   | 0 | 23.19 | 20 | 30  | 7  | 1303 | -2.12 |
| 2901.1  | 23 | Q9UPR8      | K.PGPAEAPSPATSPSI.PGPAEAPSP[181.014]P              | 3 | 0.283  | 0.025    | -0.005   | 0 | 23.23 | 20 | 22  | 6  | 1303 | -1.72 |
| 2821.2  | 18 | Q9UPR8      | K.PGPAEAPSPATSPSI.PGPAEAPSP[166.9984]PTASPSGI      | 3 | 1.655  | 4.00E-05 | -0.006   | 0 | 52.46 | 21 | 73  | 7  | 1303 | -2.11 |
| 2405.1  | 13 | Q9UPR8      | R.NSPAFSLDGLDED.NSPAFSL[166.9984]DLGLDEDV          | 3 | 1.668  | 7.50E-04 | -0.004   | 0 | 40.25 | 21 | 40  | 6  | 1470 | -1.44 |
| 1573.8  | 7  | Q9UPY5      | R.LPSLGNKEPPGQEK.LPS[166.9984]LGNKEPPGQEK          | 3 | 0.225  | 0.033    | -0.004   | 1 | 23.65 | 21 | 43  | 3  | 501  | -2.31 |
| 808.4   | 6  | Q9UPY5      | R.LPSLGNK.E LPS[166.9984]LGNK                      | 2 | 0.717  | 0.001    | -0.002   | 0 | 36.53 | 19 | 43  | 3  | 501  | -2.5  |
| 2164    | 8  | Q9UQ35      | R.QGSIQSPQANEQSV.QGSIQSPQANEQSV[181.014]P          | 3 | 0.098  | 0.041    | -0.004   | 1 | 21.38 | 20 | 607 | 78 | 2752 | -2.1  |
| 2443.1  | 13 | Q9UQ35      | K.EQNSALPTSSQDEE.EQNSALPTSS[166.9984]QDEELI        | 2 | 2.337  | 2.60E-05 | -0.004   | 0 | 54.73 | 21 | 607 | 78 | 2752 | -1.46 |
| 978.47  | 5  | Q9UQ35      | R.TSPPLDR.A TS[166.9984]PPLDR                      | 2 | -0.676 | 0.04     | -0.002   | 0 | 22.6  | 19 | 607 | 78 | 2752 | -1.81 |
| 1146.5  | 7  | Q9UQ35      | R.GEFSASPMMLK.S GEFSAS[166.9984]PMLK               | 2 | -0.166 | 0.007    | -0.002   | 0 | 28.7  | 20 | 607 | 78 | 2752 | -1.8  |
| 2212.9  | 18 | Q9UQ35      | K.AQTTPPGPSLGSKSI.AQT[181.014]TPPGPSLGSKSI         | 2 | -0.21  | 0.008    | -0.006   | 1 | 28.26 | 20 | 607 | 78 | 2752 | -2.54 |
| 2715.2  | 13 | Q9UQ35      | R.GEGDAPFSEPGTTS.GEGDAPFSEPGTTS[166.9984]P         | 3 | 0.871  | 0.006    | -0.006   | 1 | 30.11 | 21 | 607 | 78 | 2752 | -2.34 |
| 1981.9  | 18 | Q9UQ35      | R.SGSSQELDVKPSAS.SGSSQELDVKPSAS[166.9984]P         | 3 | 0.673  | 0.012    | -0.004   | 1 | 28.13 | 21 | 607 | 78 | 2752 | -2.03 |
| 2244    | 8  | Q9UQ35      | R.QGSIQSPQANEQSV.QGSI[181.014]QSPQANEQSVT          | 2 | -0.307 | 0.01     | -0.005   | 1 | 27.29 | 20 | 607 | 78 | 2752 | -2.34 |
| 1475.6  | 8  | Q9UQ35      | R.SCFESSPDELK.S SC[160.0307]FESS[166.9984]PI       | 2 | 0.401  | 0.002    | -0.002   | 0 | 32.37 | 18 | 607 | 78 | 2752 | -1.48 |
| 1129.6  | 6  | Q9UQ35      | R.RVPSPTPAPK.E RVPS[166.9984]PTPAPK                | 2 | 0.655  | 0.001    | -0.002   | 1 | 35.91 | 19 | 607 | 78 | 2752 | -1.35 |
| 1180.6  | 6  | Q9UQ35      | R.PMSPTPLDR.C PMS[166.9984]PTPLDR                  | 2 | 1.414  | 2.10E-04 | -0.002   | 0 | 42.5  | 18 | 607 | 78 | 2752 | -1.77 |
| 1826.8  | 8  | Q9UQ35      | K.THTTLAGRSPSPA.THTTLAGRS[166.9984]P               | 2 | -0.052 | 0.005    | -0.004   | 1 | 30.84 | 21 | 607 | 78 | 2752 | -2.41 |
| 1660.7  | 12 | Q9UQ35      | K.MALPQEDATASPI.MALPQEDATAS[166.9984]P             | 2 | 1.367  | 2.50E-04 | -0.004   | 0 | 44.03 | 20 | 607 | 78 | 2752 | -2.12 |
| 1306.9  | 9  | Q9UQ35      | K.AQTTPPGPSLGSKSI.AQT[181.014]TPPGPSLGSKSI         | 2 | -0.042 | 0.006    | -0.002   | 0 | 29.94 | 20 | 607 | 78 | 2752 | -1.89 |
| 1475.6  | 8  | Q9UQ35      | R.SRSPSPPELNNK.C SRSP[166.9984]P                   | 2 | -0.682 | 0.026    | -0.001   | 1 | 22.54 | 19 | 607 | 78 | 2752 | -0.73 |
| 2007.9  | 9  | Q9UQ35      | R.QGSIQSPQANEQSV.QGSI[166.9984]QSPQANEQSVT         | 2 | -0.479 | 0.014    | -0.005   | 0 | 26.57 | 21 | 607 | 78 | 2752 | -2.66 |
| 3012.4  | 35 | Q9UQ35      | R.HGGSPQPLATTLPS.HGGS[166.9984]PQPLATTLPSQ         | 3 | 2.572  | 1.00E-04 | -0.008   | 0 | 47.88 | 20 | 607 | 78 | 2752 | -2.75 |
| 1213.9  | 9  | Q9UQ35      | R.SSSPVTLASR.S SSS[166.9984]PVTLASR                | 2 | 1.978  | 2.40E-05 | -0.002   | 0 | 53.47 | 20 | 607 | 78 | 2752 | -1.4  |
| 1776.7  | 13 | Q9UQ35      | R.SGGHSSSELSPDAVI.SGGHSS[166.9984]SSELS[166.992]   | 2 | -0.898 | 0.042    | -0.005   | 0 | 20.38 | 19 | 607 | 78 | 2752 | -2.74 |
| 973.48  | 6  | Q9UQ35      | R.VPSPTPAPK.E VPS[166.9984]PTPAPK                  | 2 | -0.928 | 0.041    | -0.002   | 0 | 23.08 | 22 | 607 | 78 | 2752 | -1.66 |
| 1920.9  | 13 | Q9UQ35      | K.LPQSSSESSPSPPC.LPQSSSESSPSPPC[166.9984]PQP       | 2 | 1.978  | 2.60E-07 | -0.004   | 0 | 74.17 | 21 | 607 | 78 | 2752 | -2.3  |
| 2061.9  | 19 | Q9UQ35      | R.SGSSQELDVKPSAS.SGSS[166.9984]QELDVKPSAS[1]       | 2 | -0.202 | 0.007    | -0.005   | 1 | 29.34 | 21 | 607 | 78 | 2752 | -2.5  |
| 1350.6  | 8  | Q9UQ35      | R.SRTPSPAPSQSR.M SRTPSPAPSQSR                      | 3 | 0.196  | 0.032    | -0.001   | 1 | 23.36 | 21 | 607 | 78 | 2752 | -0.78 |
| 2795.1  | 14 | Q9UQ35      | R.GEGDAPFSEPGTTS.GEGDAPFSEPGTTS[166.9984]P         | 3 | 1.793  | 8.30E-04 | -0.006   | 1 | 38.33 | 20 | 607 | 78 | 2752 | -1.99 |
| 1981.9  | 8  | Q9UQ35      | R.SGSSQELDVKPSAS.SGSS[166.9984]QELDVKPSASP         | 2 | 1.661  | 1.20E-04 | -0.005   | 1 | 47.97 | 21 | 607 | 78 | 2752 | -2.59 |
| 1394.6  | 8  | Q9UQ35      | R.QSHSESPQLSK.S QSHSESP[166.9984]LQSK              | 2 | -0.361 | 0.013    | -0.002   | 0 | 25.75 | 19 | 607 | 78 | 2752 | -1.39 |
| 3092.3  | 9  | Q9UQ35      | R.HGGSPQPLATTLPS.HGGS[166.9984]P                   | 2 | 0.201  | 0.031    | -0.005   | 0 | 23.37 | 21 | 597 | 77 | 2752 | -1.55 |
| 1475.6  | 13 | Q9UQ35      | R.SRSPSPPELNNK.C SRSP[166.9984]P                   | 2 | 0.186  | 0.004    | -0.001   | 1 | 31.17 | 19 | 597 | 77 | 2752 | -0.66 |
| 2007.9  | 9  | Q9UQ35      | R.QGSIQSPQANEQSV.QGSIQSPQANEQSV[181.014]P          | 2 | 1.629  | 1.10E-04 | -0.005   | 0 | 47.6  | 21 | 597 | 77 | 2752 | -2.56 |
| 2216.8  | 11 | Q9UQ35      | R.HASSPESPAPAI.HAS[166.9984]P                      | 2 | 0.359  | 0.022    | -0.003   | 1 | 21.95 | 18 | 597 | 77 | 2752 | -1.43 |
| 3092.3  | 18 | Q9UQ35      | R.HGGSPQPLATTLPS.HGGS[166.9984]PQPLATTLPSQ         | 3 | 1.829  | 6.90E-04 | -0.009   | 0 | 39.65 | 21 | 597 | 77 | 2752 | -1.81 |
| 1394.6  | 14 | Q9UQ35      | R.QSHSESPQLSK.S QSHSE[166.9984]PQLSK               | 2 | 0.378  | 0.002    | -0.002   | 0 | 33.09 | 19 | 597 | 77 | 2752 | -1.25 |
| 1920.9  | 21 | Q9UQ35      | K.LPQSSSESSPSPPC.LPQSSSESSPSPPC[181.014]P          | 2 | 0.227  | 0.003    | -0.004   | 0 | 33.53 | 21 | 597 | 77 | 2752 | -2.3  |
| 2061.9  | 16 | Q9UQ35      | R.SGSSQELDVKPSAS.SGSS[166.9984]QELDVKPSAS[1]       |   |        |          |          |   |       |    |     |    |      |       |

|        |    |             |                   |                                        |   |        |          |           |   |       |    |     |    |      |       |
|--------|----|-------------|-------------------|----------------------------------------|---|--------|----------|-----------|---|-------|----|-----|----|------|-------|
| 995.46 | 7  | Q9UQ35      | K.ELNSPLR.E       | ELNS[166.9984]PLR                      | 2 | -0.609 | 0.023    | -0.002    | 0 | 22.3  | 18 | 661 | 83 | 2752 | -2.23 |
| 1257.6 | 10 | Q9UQ35      | R.SLTRSPAIR.R     | SLT[181.014]RS[166.9984]PPA            | 2 | -0.866 | 0.034    | -0.003    | 1 | 22.73 | 21 | 661 | 83 | 2752 | -2.46 |
| 1350.6 | 7  | Q9UQ35      | R.SRTPSPASQSR.M   | SRT[181.014]PPSAPSQSR                  | 2 | -0.339 | 0.011    | -2.00E-04 | 1 | 27    | 20 | 661 | 83 | 2752 | -0.18 |
| 1696.7 | 9  | Q9UQ35      | R.SGSHSSELSPDAVI  | SGSH[166.9984]SSELSPDAVEK              | 2 | 1.522  | 1.50E-04 | -0.005    | 0 | 46.44 | 21 | 643 | 82 | 2752 | -2.8  |
| 1981.9 | 10 | Q9UQ35      | R.SGSSQELDVKPSAS  | SGS[166.9984]SQELDVKPSASP              | 3 | 0.705  | 0.011    | -0.004    | 1 | 28.39 | 21 | 643 | 82 | 2752 | -2.03 |
| 1981.9 | 11 | Q9UQ35      | R.SGSSQELDVKPSAS  | SGSSQELDVKPS[166.9984]ASP              | 3 | 1.975  | 5.80E-04 | -0.004    | 1 | 41.09 | 21 | 643 | 82 | 2752 | -2.03 |
| 2517.1 | 11 | Q9UQ35      | K.AGMSSNQSISSPVL  | AGMSSNQSISS[166.9984]PVL               | 3 | 2.169  | 3.20E-04 | -0.004    | 1 | 43.05 | 21 | 597 | 77 | 2752 | -1.6  |
| 1685.7 | 19 | Q9UQ88,P211 | R.DLLSDLDQIDSESR  | DLLSDLDQI[166.9984]DSESR               | 2 | 1.193  | 3.20E-04 | -0.002    | 0 | 43.29 | 21 | 47  | 5  |      | -1.15 |
| 2339.1 | 29 | Q9UQ88,P211 | R.GTSPRRPEGLGVS   | GTS[166.9984]PRRPEGLGVSQ               | 3 | 0.151  | 0.034    | -0.005    | 1 | 22.85 | 21 | 65  | 1  |      | -1.97 |
| 2246.9 | 18 | Q9UQ7E      | K.KGDVGEQSQDQEG   | KGDVGEQS[166.9984]QDQEGE               | 3 | 1.216  | 0.003    | -0.003    | 1 | 32.56 | 20 | 55  | 3  | 1217 | -1.28 |
| 1242.5 | 6  | Q9UQN3      | K.ATISDEEIER.Q    | ATIS[166.9984]DEEIER                   | 2 | -0.542 | 0.019    | -0.003    | 0 | 23.84 | 19 | 24  | 1  | 213  | -2.67 |
| 1791.8 | 9  | Q9UQR1      | K.GLLTSEEDSGFSTS  | GLLTSEEDSGFSTS[166.9984]P              | 2 | 0.236  | 0.003    | -0.004    | 0 | 33.69 | 21 | 34  | 5  | 794  | -2.25 |
| 3580.6 | 25 | Q9Y232      | R.TAVDGFQSESPKLV  | TAVDGFQSES[166.9984]PEKLV              | 3 | 1.41   | 1.20E-05 | -0.012    | 1 | 55.95 | 19 | 56  | 1  | 598  | -3.3  |
| 3580.6 | 22 | Q9Y232      | R.TAVDGFQSESPKLV  | TAVDGFQSES[166.9984]ESPEKLV            | 3 | 1.544  | 2.00E-05 | -0.012    | 1 | 53.64 | 19 | 54  | 2  | 598  | -3.3  |
| 4004.7 | 32 | Q9Y261      | K.AAAGAQASQAQLK   | AAAGAQASQAQLGEAAGPASET                 | 4 | 0.038  | 0.002    | -0.013    | 0 | 35.72 | 20 | 36  | 2  | 457  | -3.13 |
| 4004.7 | 21 | Q9Y261      | K.AAAGAQASQAQLK   | AAAGAQASQAQLGEAAGPASET                 | 4 | 0.696  | 0.008    | -0.013    | 0 | 28.71 | 20 | 46  | 2  | 457  | -3.13 |
| 3924.7 | 26 | Q9Y261      | K.AAAGAQASQAQLK   | AAAGAQASQAQLGEAAGPASET                 | 4 | 0.191  | 0.006    | -0.011    | 0 | 30.76 | 21 | 44  | 3  | 457  | -2.75 |
| 4004.7 | 17 | Q9Y261      | K.AAAGAQASQAQLK   | AAAGAQASQAQLGEAAGPASET                 | 4 | 0.191  | 0.003    | -0.013    | 0 | 33.33 | 20 | 44  | 3  | 457  | -3.13 |
| 3924.7 | 16 | Q9Y261      | K.AAAGAQASQAQLK   | AAAGAQASQAQLGEAAGPASET                 | 4 | 0.246  | 0.002    | -0.011    | 0 | 36.34 | 21 | 46  | 2  | 457  | -2.75 |
| 2430.5 | 15 | Q9Y266      | K.NGSLDQSPKQDTEF  | NGSLD[166.9984]PKQDTEED                | 3 | 0.145  | 0.037    | -0.004    | 1 | 19.85 | 18 | 20  | 1  | 331  | -1.81 |
| 2272.9 | 5  | Q9Y2B1      | R.EQSTLESEEWNPWI  | EQSTLES[166.9984]EENWNPWE              | 2 | -0.713 | 0.029    | -0.005    | 0 | 22.26 | 19 | 22  | 3  | 443  | -2.14 |
| 2095.8 | 8  | Q9Y2D5      | K.SPGALETSAAGSQ   | [166.9984]PGALETSAAGSQ                 | 2 | 0.38   | 0.002    | -0.005    | 0 | 35.11 | 21 | 52  | 6  | 859  | -2.56 |
| 1223.6 | 5  | Q9Y2D5      | R.QVLQSTQSPR.T    | QVLQSTQS[166.9984]PR                   | 2 | 0.344  | 0.003    | -0.002    | 0 | 34.75 | 21 | 52  | 6  | 859  | -1.71 |
| 3855.5 | 22 | Q9Y2G4      | K.STPSTCESSGTVDQJ | STPST[181.014]C[160.0307]ES            | 3 | 0.316  | 0.028    | -0.009    | 1 | 21.52 | 18 | 22  | 8  | 727  | -2.24 |
| 1781.8 | 12 | Q9Y2H5      | R.TKSPDDEVTPSAV   | T[181.014]KSPDDEVTPSAVVR               | 2 | 2.098  | 4.50E-05 | -0.004    | 1 | 51.34 | 20 | 51  | 2  | 1048 | -3.25 |
| 1781.8 | 10 | Q9Y2H5      | R.TKSPDDEVTPSAV   | T[181.014]KSPDDEVTPSAVVI               | 2 | -0.808 | 0.037    | -0.004    | 1 | 22.25 | 20 | 48  | 5  | 1048 | -1.25 |
| 1552.7 | 6  | Q9Y2H5      | K.SPDTDEVTPSAV    | SPDT[181.014]DEVTPSAVVR                | 2 | 1.298  | 2.60E-04 | -0.003    | 0 | 44.31 | 21 | 48  | 5  | 1048 | -2.75 |
| 1125.4 | 4  | Q9Y2H6      | K.MSSPSSPKQ.C     | MSS[166.9984]PPSSPKQ                   | 2 | -0.695 | 0.026    | -0.001    | 0 | 22.36 | 19 | 22  | 6  | 914  | -0.87 |
| 3543.4 | 9  | Q9Y2K6      | R.TNSEQVDEDADV.D  | TNS[166.9984]EQVDEDADVDT               | 3 | 0.736  | 0.009    | -0.009    | 0 | 26.69 | 19 | 27  | 4  | 198  | -2.69 |
| 2502   | 8  | Q9Y2K6      | K.AVPIVADEGESES   | AVPIVADEGES[166.9984]ES                | 1 | 0.457  | 0.019    | -0.004    | 1 | 24.92 | 20 | 25  | 1  | 914  | -1.49 |
| 1820.7 | 5  | Q9Y2K7      | R.RYEDDGSDEIEGI   | RYEDDGS[166.9984]DDEIEG                | 3 | -0.533 | 0.018    | -0.006    | 1 | 23.93 | 19 | 24  | 4  | 1162 | -3.23 |
| 1728.9 | 19 | Q9Y2Q3      | R.NEDITEPQSLAAEA  | NEDITEPQSLAAEA                         | 2 | 2.462  | 2.00E-05 | -0.003    | 0 | 54.84 | 20 | 55  | 2  | 226  | -1.56 |
| 2141.7 | 12 | Q9Y2U8      | R.ENYSDSEEDDDV    | ENYSD[166.9984]EEDDDVVA                | 2 | 1.978  | 1.10E-07 | -0.005    | 0 | 71.73 | 15 | 72  | 1  | 911  | -2.31 |
| 861.39 | 5  | Q9Y2V2      | R.TFSATV.RA       | TFS[166.9984]ATV.R                     | 2 | -0.635 | 0.021    | -0.002    | 0 | 24.94 | 21 | 25  | 1  | 147  | -2.45 |
| 1220.5 | 8  | Q9Y2W1      | K.GFSFDTLGDDGK.V  | GFS[166.9984]DTGLGDDGK                 | 2 | 1.497  | 1.70E-04 | -0.002    | 0 | 49.33 | 24 | 180 | 12 | 955  | -1.89 |
| 1096.5 | 6  | Q9Y2W1      | R.ASASVLS.PR.E    | ASASVLS[166.9984]PR                    | 1 | -0.854 | 0.036    | -0.002    | 0 | 22.46 | 21 | 180 | 12 | 955  | -2.68 |
| 1115.5 | 5  | Q9Y2W1      | R.IDIS.PTRK.H     | IDIS[166.9984]PSTRK                    | 2 | 0.225  | 0.003    | -0.002    | 0 | 33.61 | 21 | 180 | 12 | 955  | -1.27 |
| 1463.6 | 15 | Q9Y2W1      | K.SPSTSTYSSQK.S   | [166.9984]PSTSTYSSQK                   | 2 | -0.305 | 0.01     | -0.002    | 0 | 28.31 | 21 | 180 | 12 | 955  | -1.29 |
| 1064.6 | 6  | Q9Y2W1      | K.SPLQSV.VR.R     | S[166.9984]PLQSVVR                     | 2 | 0.624  | 0.001    | -0.002    | 0 | 36.6  | 20 | 180 | 12 | 955  | -1.87 |
| 2230   | 11 | Q9Y2W1      | R.MDSFDDELARPSG   | MDS[166.9984]FDELARPSGL                | 3 | 1.646  | 0.001    | -0.003    | 1 | 36.86 | 20 | 200 | 12 | 955  | -1.51 |
| 2465.9 | 12 | Q9Y2W1      | K.FSGEEGIEDEDESG  | FSGEEGIEDEDESGT[181.014]EN             | 2 | 1.583  | 1.40E-04 | -0.005    | 1 | 45.16 | 19 | 186 | 11 | 955  | -1.93 |
| 2465.9 | 13 | Q9Y2W1      | K.FSGEEGIEDEDESG  | FSGEEGIEDEDES[166.9984]GTE             | 3 | 1.159  | 0.004    | -0.008    | 1 | 31.92 | 20 | 186 | 11 | 955  | -3.31 |
| 1243.6 | 5  | Q9Y2W1      | R.IDIS.PTRK.H     | IDIS[166.9984]PSTRK                    | 2 | -0.806 | 0.035    | -0.002    | 1 | 21.2  | 19 | 186 | 11 | 955  | -2.02 |
| 3711.4 | 23 | Q9Y2W2      | R.MAGQEIEEGREVE   | MAGQEIEEGREVEEVEDDEDI                  | 3 | 1.41   | 1.50E-04 | -0.006    | 1 | 44.2  | 18 | 44  | 1  | 641  | -1.53 |
| 3871.3 | 28 | Q9Y2W2      | R.MAGQEIEEGREVE   | MAGQEIEEGREVEEVS[166.9984]             | 3 | 1.332  | 0.002    | -0.006    | 1 | 28.65 | 15 | 36  | 2  | 641  | -1.56 |
| 3791.3 | 36 | Q9Y2W2      | R.MAGQEIEEGREVE   | MAGQEIEEGREVEEVS[166.9984]             | 3 | 1.268  | 0.003    | -0.007    | 1 | 30.03 | 17 | 34  | 2  | 641  | -1.85 |
| 2284   | 14 | Q9Y2X3      | K.EEPLSEEEPTSTAI  | EPL[166.9984]EEEP[160.03]              | 2 | 2.019  | 1.60E-05 | -0.005    | 0 | 51.55 | 21 | 232 | 13 | 529  | -2.4  |
| 2742.2 | 20 | Q9Y2X3      | K.HIKEEPLSEEEPTST | HIKEEPL[166.9984]EEEP[160.03]          | 2 | 2.492  | 1.60E-04 | -0.005    | 1 | 46.32 | 21 | 232 | 13 | 529  | -1.91 |
| 2363.9 | 13 | Q9Y2X3      | K.EEPLSEEEPTSTAI  | EPL[166.9984]EEEP[160.03]              | 2 | 1.708  | 1.00E-04 | -0.005    | 0 | 47.44 | 20 | 232 | 13 | 529  | -2.24 |
| 2662.2 | 14 | Q9Y2X3      | K.HIKEEPLSEEEPTST | HIKEEPL[166.9984]EEEP[160.03]          | 2 | 2.572  | 2.20E-05 | -0.005    | 1 | 55.11 | 21 | 232 | 13 | 529  | -2.03 |
| 2284   | 14 | Q9Y2X3      | K.EEPLSEEEPTSTAI  | EPL[166.9984]EEEP[160.0307]TSTAIAS     | 2 | 2.647  | 1.10E-05 | -0.005    | 1 | 57.78 | 21 | 307 | 13 | 529  | -2.23 |
| 2662.2 | 16 | Q9Y2X3      | K.HIKEEPLSEEEPTST | HIKEEPL[166.9984]EEEP[160.0307]TSTAIAS | 2 | 1.574  | 0.001    | -0.005    | 1 | 37.07 | 21 | 216 | 14 | 529  | -2.03 |
| 2492   | 9  | Q9Y2X3      | K.EEPLSEEEPTSTAI  | EPL[166.9984]EEEP[160.03]              | 2 | -0.649 | 0.024    | -0.003    | 1 | 23.8  | 20 | 246 | 11 | 529  | -1.35 |
| 2664.6 | 6  | Q9Y320      | K.AGDNIPPEQVAST   | AGDNIPPEQVASTPTTVS[166.9984]           | 3 | 0.586  | 0.013    | -0.006    | 1 | 27.26 | 21 | 27  | 2  | 296  | -2.49 |
| 1481.6 | 9  | Q9Y388      | R.EVQAEQSPSSSPR.F | EVQAEQSPSSS[166.9984]PR                | 2 | 1.347  | 2.0E-04  | -0.002    | 0 | 44.83 | 21 | 52  | 3  | 322  | -1.19 |
| 1823.8 | 11 | Q9Y388      | K.ADREVAEQSPSSS   | ADREVAEQSPSSS[166.9984]SSP             | 2 | -0.283 | 0.01     | -0.003    | 1 | 24.83 | 21 | 52  | 3  | 322  | -1.72 |
| 1823.8 | 10 | Q9Y388      | K.ADREVAEQSPSSS   | ADREVAEQSPSSS[166.9984]P               | 2 | -0.638 | 0.024    | -0.003    | 1 | 24.88 | 21 | 61  | 2  | 322  | -1.72 |
| 1823.8 | 8  | Q9Y388      | K.ADREVAEQSPSSS   | ADREVAEQSPSSS[166.9984]SP              | 2 | -0.863 | 0.039    | -0.003    | 1 | 22.76 | 21 | 41  | 3  | 322  | -1.72 |
| 1823.8 | 12 | Q9Y388      | K.ADREVAEQSPSSS   | ADREVAEQSPSSS[166.9984]SSP             | 2 | -0.005 | 0.006    | -0.003    | 1 | 31.17 | 21 | 31  | 2  | 322  | -1.72 |
| 2760.9 | 8  | Q9Y389      | K.DHFYSDDDAEADS   | DHFY[243.0297]DDDAEADS                 | 3 | 0.53   | 0.016    | -0.007    | 0 | 18.7  | 13 | 19  | 1  | 282  | -2.44 |
| 2760.9 | 18 | Q9Y389      | K.DHFYSDDDAEADS   | DHFYS[166.9984]DDDAEADS                | 3 | 0.091  | 0.044    | -0.007    | 0 | 14.31 | 13 | 14  | 3  | 282  | -2.44 |
| 4282.7 | 25 | Q9Y3E1      | K.FTYQAIQQSSSE    | FTYQAIQQSSSETEGEGNTAI                  | 4 | 0.038  | 0.016    | -0.008    | 1 | 32.21 | 18 | 23  | 1  | 203  | -1.96 |
| 4282.7 | 35 | Q9Y3E1      | K.FTYQAIQQSSSE    | FTYQAIQQSSSETEGEGNTAI                  | 4 | 0.206  | 0.002    | -0.008    | 1 | 32.64 | 18 | 33  | 1  | 203  | -1.96 |
| 3637.5 | 23 | Q9Y3E7      | K.VTDALPEPEPPGAA  | VTDALPEPEPPGAMAAS[166.9984]            | 3 | 1.869  | 6.50E-04 | -0.006    | 0 | 39.09 | 20 | 39  | 1  | 222  | -1.69 |
| 2364.8 | 10 | Q9Y3T9      | K.DFLDLSNSEDDETE  | DFLDLNS[166.9984]S[166.9984]           | 2 | 0.531  | 0.002    | -0.004    | 0 | 30.67 | 15 | 749 | 2  | 749  | -2.49 |
| 2284.9 | 11 | Q9Y3T9      | K.DFLDLSNSEDDETE  | DFLDLNS[166.9984]SEEDTEGI              | 2 | 1.978  | 2.60E-06 | -0.003    | 0 | 60.59 | 17 | 75  | 2  | 749  | -1.45 |
| 2284.9 | 11 | Q9Y3T9      | K.DFLDLSNSEDDETE  | DFLDLNS[166.9984]EEDTEGI               | 2 | 1.655  | 2.00E-05 | -0.003    | 0 | 51.8  | 17 | 147 | 3  | 749  | -1.24 |
| 2159   | 11 | Q9Y3X0      | K.EGAASPAPEPQPT   | EGAASPAPEPQPTS[166.9984]               | 2 | 0.567  | 0.001    | -0.005    | 0 | 37.03 | 21 | 37  | 2  | 531  | -2.45 |
| 2159   | 11 | Q9Y3X0      | K.EGAASPAPEPQPT   | EGAASPAPEPQPT[181.014]PI               | 2 | 0.489  | 0.002    | -0.005    | 0 | 36.22 | 21 | 40  | 3  | 531  | -2.45 |
| 2159   | 11 | Q9Y3X0      | K.EGAASPAPEPQPT   | EGAASPAPEPQPT[181.014]PET              | 2 | -0.415 | 0.013    | -0.005    | 0 | 27.14 | 21 | 27  | 3  | 531  | -2.45 |
| 2238.9 | 10 | Q9Y3X0      | K.EGAASPAPEPQPT   | EGAASPAPEPQPT[181.014]PI               | 2 | -0.656 | 0.025    | -0.005    | 0 | 23.83 | 20 | 42  | 2  | 531  | -2.28 |
| 2238.9 | 9  | Q9Y3X0      | K.EGAASPAPEPQPT   | EGAASPAPEPQPTS[166.9984]               | 2 | 1.187  | 3.60E-04 | -0.005    | 0 | 42.18 | 20 | 71  | 3  | 531  | -2.38 |
| 1643.8 | 11 | Q9Y446      | R.LSGFDDILDPSAVI  | LSS[166.9984]GDFDILDPSAVK              | 2 | 2.512  | 1.40E-05 | -0.002    | 0 | 57.48 | 22 | 57  | 8  | 797  | -1.28 |
| 1751.8 | 17 | Q9Y446      | R.AGGDLWPEATEVS   | AGGDLWPEATEVS[166.9984]PS              | 2 | -0.567 | 0.021    | -0.004    | 0 | 25.59 | 21 | 68  | 6  | 797  | -2.29 |
| 3139.3 | 16 | Q9Y487      | R.KDSEEEVSLGSDI   | KDS[166.9984]EEVSLGSDQIE               | 3 | 1.41   | 7.50E-07 | -0.008    | 1 | 68.07 | 19 | 68  | 6  | 856  | -2.44 |
| 1366.7 | 17 | Q9Y4A5      | R.SQSLPGADSLAK.P  | SQS[166.9984]LPGADSLAK                 | 2 | 0.009  | 0.005    | -0.002    | 0 | 31.45 | 21 | 31  | 6  | 3859 | -1.65 |
| 1962.8 | 12 | Q9Y4B5      | K.REGPVGGESDEEN   | REGPVGGES[166.9984]DSEEMF              | 3 | 1.41   | 7.80E-04 | -0.003    | 1 | 37.3  | 19 | 56  | 13 | 1905 | -1.61 |
| 2253   | 10 | Q9Y4B5      | K.SLYGDVDPPLTGE   | SLYGDVDS[166.9984]PLTGEA               | 2 | 0.77   | 8.10E-04 | -0.006    | 0 | 39.   |    |     |    |      |       |

|        |    |        |                                                        |        |          |          |   |       |    |     |    |      |       |
|--------|----|--------|--------------------------------------------------------|--------|----------|----------|---|-------|----|-----|----|------|-------|
| 2186   | 22 | Q9Y608 | R.RGSGDTSSLI DPDT: RGS GDT[S166.9984]SLIDPDTSL 3       | 1.386  | 0.002    | -0.004   | 1 | 36.26 | 22 | 80  | 3  | 721  | -1.76 |
| 2186   | 21 | Q9Y608 | R.RGSGDTSSLI DPDT: RGS GDT[S181.014]SSLI DPDTSL 3      | 1.664  | 0.001    | -0.004   | 1 | 39    | 22 | 63  | 3  | 721  | -1.76 |
| 2186   | 10 | Q9Y608 | R.RGSGDTSSLI DPDT: RGS[S166.9984]GDTSSLI DPDTSL 2      | 0.541  | 0.002    | -0.005   | 1 | 36.72 | 21 | 63  | 3  | 721  | -2.45 |
| 1529.7 | 9  | Q9Y608 | R.NSASATPLSGNSSI NSASATPLSGNSS[S166.9984]R 2           | -0.621 | 0.021    | -0.002   | 0 | 25.1  | 21 | 63  | 3  | 721  | -1.59 |
| 2186   | 10 | Q9Y608 | R.RGSGDTSSLI DPDT: RGS GDT[S166.9984]LIDPDTSL 3        | 1.56   | 0.001    | -0.004   | 1 | 37.95 | 22 | 38  | 2  | 721  | -1.76 |
| 2983.1 | 21 | Q9Y618 | R.GECSPATVNNSS GEC[S160.0307]SGPATVNNSSDT 3            | 1.41   | 6.90E-04 | -0.008   | 0 | 37.18 | 18 | 98  | 10 | 2525 | -2.56 |
| 1361.7 | 9  | Q9Y618 | R.ANASQPPLDLK.Q ANAS[S166.9984]PKPLDLK 2               | -0.976 | 0.047    | -0.004   | 1 | 21.6  | 21 | 98  | 10 | 2525 | -2.73 |
| 1544.7 | 7  | Q9Y618 | K.SPGNSQPPAFFSK S[S166.9984]PGNSQPPAFFSK 2             | -0.539 | 0.016    | -0.002   | 0 | 25.92 | 21 | 104 | 9  | 2525 | -1.55 |
| 2752   | 20 | Q9Y618 | K.SSGAPQDSSATC SSGAPQDSSATC[S160.0307]S 3              | 0.481  | 0.017    | 0.001    | 0 | 24.17 | 19 | 104 | 9  | 2525 | 0.39  |
| 2772.2 | 10 | Q9Y618 | K.TSVLGGGEGIEPV TSVLGGGEGIEPV[S166.9984]J 3            | 1.25   | 0.003    | -0.006   | 0 | 33.85 | 21 | 49  | 8  | 2525 | -2.11 |
| 3240.3 | 17 | Q9Y618 | R.SLGYHGSSYPEGVI SLGY[S243.0297]HGSSYPEGVEF 3          | 0.306  | 0.028    | -0.003   | 0 | 22.41 | 19 | 49  | 8  | 2525 | -0.87 |
| 3240.3 | 20 | Q9Y618 | R.SLGYHGSSYPEGVI SLGY[S166.9984]PEGVEF 3               | 0.109  | 0.044    | -0.003   | 0 | 20.44 | 19 | 80  | 11 | 2525 | -0.87 |
| 2563.2 | 14 | Q9Y618 | K.LEPVPPSPHHTPI LEPV[S166.9984]PPS[S166.9984] 3        | 0.132  | 0.041    | -0.004   | 0 | 21.72 | 20 | 98  | 10 | 2525 | -1.68 |
| 1100.5 | 8  | Q9Y624 | K.VIYSQPSAR.S VIYSQPS[S166.9984]AR 2                   | -0.721 | 0.025    | -0.002   | 0 | 23.1  | 20 | 26  | 4  | 299  | -2.07 |
| 1857.8 | 12 | Q9Y624 | K.VIYSQPSARSEGEFK VIYSQPS[S166.9984]ARS[S166.9984] 3   | 0.183  | 0.004    | -0.004   | 1 | 33.16 | 21 | 42  | 4  | 299  | -1.97 |
| 1629.7 | 10 | Q9Y6D5 | R.GSSLSGTDGAEV GSS[S166.9984]LSGTDGAEV 2               | 2.735  | 6.80E-06 | -0.006   | 0 | 59.71 | 21 | 60  | 2  | 1785 | -3.66 |
| 2347   | 18 | Q9Y6G9 | R.DFQYVEVPEGDFPA DFQYVEVPEGDFPAS[S166.9984] 3          | 0.296  | 0.027    | -0.004   | 1 | 23.31 | 20 | 23  | 2  | 523  | -1.9  |
| 1324.6 | 10 | Q9Y6M5 | K.NMPNKQPESSL- NMPNKQPESS[S166.9984]SL 2               | -0.799 | 0.031    | -0.004   | 1 | 22.23 | 20 | 22  | 2  | 507  | -2.99 |
| 1827.8 | 7  | Q9Y6R1 | R.NLTSSSLNDSDKPE NLTSS[S166.9984]LNDSDKPEK 2           | 1.978  | 3.40E-05 | -0.005   | 1 | 53.32 | 21 | 138 | 9  | 1079 | -2.7  |
| 2063.6 | 19 | Q9Y6R1 | K.GSLDSDNDSDCP GSLD[S166.9984]DNDSD[S166.9984] 2       | 1.516  | 1.50E-04 | -0.005   | 0 | 39.52 | 14 | 138 | 9  | 1079 | -2.31 |
| 2691.1 | 10 | Q9Y6R1 | R.ISENYSDKSDIENAC ISENY[S166.9984]DKS[S166.9984] 2     | -0.341 | 0.012    | 4.00E-04 | 1 | 26.95 | 20 | 138 | 9  | 1079 | 0.14  |
| 2691.1 | 10 | Q9Y6R1 | R.ISENYSDKSDIENAC ISENY[S243.0297]DKS[S166.9984] 3     | 1.41   | 4.50E-04 | -0.005   | 1 | 41.17 | 20 | 138 | 9  | 1079 | -1.83 |
| 2191.7 | 9  | Q9Y6R1 | K.KGSLDSDNDSDDCI KGSLD[S166.9984]DNDSD[S166.9984] 2    | 0.979  | 5.30E-04 | -0.005   | 1 | 35.15 | 15 | 138 | 9  | 1079 | -2.29 |
| 1907.8 | 17 | Q9Y6R1 | R.NLTSSSLNDSDKPE NLT[S181.014]SS[S166.9984]LN 2        | -0.215 | 0.008    | -0.005   | 1 | 29.21 | 21 | 138 | 9  | 1079 | -2.5  |
| 1907.8 | 18 | Q9Y6R1 | R.NLTSSSLNDSDKPE NLT[S181.014]SS[S166.9984]SSLN 2      | 2.217  | 3.10E-05 | -0.005   | 1 | 53.5  | 21 | 200 | 10 | 1079 | -2.5  |
| 1827.8 | 8  | Q9Y6R1 | R.NLTSSSLNDSDKPE NLTSS[S166.9984]LNDSDKPEK 3           | 0.095  | 0.044    | -0.004   | 1 | 22.28 | 21 | 169 | 12 | 1079 | -2.27 |
| 2691.1 | 11 | Q9Y6R1 | R.ISENYSDKSDIENAC ISENY[S243.0297]SS[S166.9984]D 3     | 1.544  | 2.60E-04 | -0.005   | 1 | 43.59 | 20 | 169 | 12 | 1079 | -1.83 |
| 1907.8 | 17 | Q9Y6R1 | R.NLTSSSLNDSDKPE NLT[S181.014]SS[S166.9984]LN 2        | 1.214  | 3.10E-04 | -0.005   | 1 | 43.43 | 21 | 153 | 9  | 1079 | -2.5  |
| 1827.8 | 16 | Q9Y6R1 | R.NLTSSSLNDSDKPE NLT[S166.9984]SSLNDSDKPEK 2           | 1.051  | 4.90E-04 | -0.005   | 1 | 41.8  | 21 | 153 | 9  | 1079 | -2.7  |
| 1033.5 | 6  | Q9Y6R1 | K.PLIJSPAAR.I PLIJ[S166.9984]JPAAR 2                   | -0.24  | 0.009    | -0.002   | 0 | 27.93 | 20 | 200 | 10 | 1079 | -1.98 |
| 1665.6 | 6  | Q9Y6R9 | R.LGSGGSDGDPSPV LGS[S166.9984]GGS[S166.9984]C 2        | -1.006 | 0.049    | -0.005   | 0 | 19.2  | 19 | 19  | 2  | 474  | -2.93 |
| 2659.1 | 27 | Q9Y6K4 | K.LESTARPSESSEFFL LESTARPSESS[S166.9984]EEFFLE 3       | 0.043  | 0.046    | -0.005   | 1 | 21.83 | 21 | 41  | 5  | 670  | -2.04 |
| 2739.1 | 8  | Q9Y6K4 | K.LESTARPSESSEFFL LESTARPSESS[S166.9984]S[S166.9984] 3 | 0.28   | 0.025    | -0.005   | 1 | 24.16 | 21 | 36  | 6  | 670  | -1.99 |
| 2680.1 | 31 | Q9Y6K4 | K.NQSEEQSEASSEL NQSEEQSEAS[S166.9984]EQLD 3            | 1.016  | 0.004    | -0.008   | 0 | 30.52 | 20 | 36  | 6  | 670  | -2.93 |
| 2680.1 | 18 | Q9Y6K4 | K.NQSEEQSEASSEL NQSEEQ[S166.9984]EASSEQLD 3            | 1.41   | 0.001    | -0.008   | 0 | 36.52 | 20 | 41  | 5  | 670  | -2.93 |
| 2659.1 | 12 | Q9Y6K4 | K.LESTARPSESSEFFL LEST[S181.014]ARPSESSEFFLE 3         | 0.212  | 0.031    | -0.005   | 1 | 23.46 | 21 | 23  | 2  | 670  | -2.04 |
| 4710.2 | 23 | Q9Y6X9 | R.LMKPPSPEHQSLD LMKPPSPEHQ[S166.9984]LDTC 4            | 0.319  | 0.011    | -0.012   | 1 | 23.71 | 16 | 24  | 2  | 1032 | -2.59 |



H358 Cell Line, Treated with DMSO vs. 20uM TRC-794 for 12hrs  
 Mascot Search Results, as reported through Rosetta Elucidator

| (M+H)+   | Ions Found | Protein Code | Peptide Sequ | Modified Pepti         | Charge | F-Score | Expectation Va | Mass Diff | # Missed Cleav | Ion Score | Identity Thresh | Protein Score | # Queries Mat | Length in Resic | Mass Error (ppm) |
|----------|------------|--------------|--------------|------------------------|--------|---------|----------------|-----------|----------------|-----------|-----------------|---------------|---------------|-----------------|------------------|
| 1937.816 | 10         | A1L170       | R.TSSLDNEGPH | TSS[166.9984]L         | 2      | 0.757   | 5.70E-04       | 0.002     | 0              | 37.12     | 17              | 37            | 1             | 272             | 0.96             |
| 1937.816 | 11         | A1L170       | R.TSSLDNEGPH | T[181.014]SSLC         | 2      | 0.126   | 0.002          | 0.002     | 0              | 30.8      | 17              | 31            | 1             | 272             | 0.96             |
| 1558.653 | 9          | A1L390       | K.AWVSSQDEV  | AWSS[166.998           | 2      | 2.067   | 2.50E-05       | 2.00E-04  | 0              | 50.22     | 17              | 84            | 4             | 1219            | 0.11             |
| 1054.472 | 5          | A1L390       | K.GPLSPFNRA  | GPLS[166.9984          | 2      | 0.256   | 0.002          | 0.001     | 0              | 32.11     | 17              | 84            | 4             | 1219            | 0.11             |
| 1302.582 | 7          | A1L390       | R.SSSVLSLEGS | SSVLS[166.998          | 2      | 0.587   | 7.20E-04       | 0.002     | 0              | 37.42     | 19              | 84            | 4             | 1219            | 1.27             |
| 1501.603 | 14         | A1L390       | K.IWEGMESSG  | IWEGMESSGG[2           |        | -0.163  | 0.005          | 0.002     | 0              | 26.9      | 16              | 96            | 4             | 1219            | 1.48             |
| 2249.016 | 11         | A1L390       | R.DGKSPVPC   | DGKS[166.9984          | 3      | 0.962   | 0.004          | 0.004     | 1              | 28.99     | 17              | 87            | 7             | 1219            | 1.85             |
| 2819.125 | 19         | ASYM69       | R.YYSPCEEHP  | YYS[166.9984]F         | 3      | 0.881   | 0.004          | 0.001     | 0              | 29.13     | 18              | 29            | 1             | 484             | 0.49             |
| 1917.803 | 22         | AGNGZ7,Q9H1  | R.RPCPYEQAG  | RPC[166.0307]L         | 2      | 1.285   | 1.50E-04       | 0.001     | 0              | 44.4      | 19              | 44            |               |                 | 0.64             |
| 2441.006 | 7          | AGNKF1       | R.TLEEVVMAE  | TLEEVVMAEEEL           | 3      | 0.491   | 0.011          | 0.003     | 0              | 24.27     | 17              | 24            | 1             | 404             | 1.37             |
| 1642.803 | 11         | AGN128       | K.IQLVQQQAD  | IQLVQQQADDA            | 2      | 2.159   | 1.80E-08       | 0.002     | 0              | 83        | 18              | 83            | 2             | 223             | 0.92             |
| 1754.748 | 10         | A7KAX9       | K.SEESLTS    | SEESLTS[166.9984]EE    | 2      | 1.568   | 8.70E-05       | 0.002     | 0              | 46.23     | 18              | 53            | 5             | 2087            | 0.96             |
| 2858.203 | 27         | A7KAX9       | K.DAETGSSQC  | DAETGSSQC[16           | 3      | 0.515   | 0.011          | -0.001    | 0              | 24.47     | 17              | 53            | 5             | 2087            | -0.44            |
| 1754.748 | 9          | A7KAX9       | K.SEESLTS    | SEESLTS[166.9984]E     | 2      | 1.3     | 1.60E-04       | 0.002     | 0              | 43.55     | 18              | 54            | 3             | 2087            | 0.96             |
| 1464.642 | 7          | B2RPK0,P0942 | K.LGEMWNNT   | LGEMWNNTA[2            |        | 1.118   | 2.10E-04       | 0.002     | 0              | 41.73     | 18              | 42            |               |                 | 1.13             |
| 1644.711 | 10         | B2RUZA       | R.DGVSIGAVSS | DGVSIGAVSS[17          | 2      | 0.208   | 0.002          | 0.001     | 0              | 31.61     | 17              | 32            | 1             | 78              | 0.77             |
| 1692.784 | 5          | C9J198       | R.LQLATLEAG  | LQLATLEAGPG[2          |        | -0.815  | 0.021          | 0.002     | 0              | 22.4      | 18              | 22            | 1             | 176             | 1.07             |
| 2063.907 | 8          | C9J1W8       | R.SPPSSSEIF  | SPSSSEIF[166.9984]P    | 2      | 1.294   | 1.70E-04       | 0.001     | 0              | 44.49     | 19              | 44            | 2             | 97              | 0.7              |
| 2063.907 | 11         | C9J1W8       | R.SPPSSSEIF  | SPSS[166.9984]P        | 2      | 1.784   | 5.60E-05       | 0.001     | 0              | 49.38     | 19              | 49            | 2             | 97              | 0.7              |
| 1324.618 | 7          | O00151       | K.VWVSPVTEG  | VWV[166.9984]E         | 2      | 0.365   | 0.001          | 0.002     | 0              | 34.19     | 18              | 34            | 1             | 329             | 1.7              |
| 1887.758 | 12         | O00161       | K.TTWGDDGG   | TTWGDDGG[2             |        | 2.065   | 2.40E-05       | 6.00E-04  | 0              | 51.2      | 18              | 51            | 1             | 211             | 0.32             |
| 2671.09  | 8          | O00193       | K.RSASPPDDL  | RSAS[166.9984]A        | 2      | 0.205   | 0.022          | 0.002     | 1              | 22.39     | 18              | 248           | 7             | 183             | 0.88             |
| 2671.09  | 14         | O00193       | K.RSASPPDDL  | RS[166.9984]A          | 2      | 2.159   | 1.20E-05       | 0.004     | 1              | 55.02     | 18              | 272           | 8             | 183             | 1.33             |
| 2514.989 | 10         | O00193       | R.SASPPDDL   | SGS[166.9984]F         | 3      | -0.19   | 0.047          | 0.003     | 0              | 17.44     | 17              | 233           | 6             | 183             | 1.14             |
| 2331.95  | 11         | O00193       | K.EESAELQAA  | EAS[166.9984]F         | 2      | -0.294  | 0.006          | 0.001     | 0              | 26.61     | 17              | 272           | 8             | 183             | 0.48             |
| 2671.09  | 12         | O00193       | K.RSASPPDDL  | RSASPPDDL[3            |        | 1.127   | 9.70E-07       | 0.002     | 1              | 65.87     | 18              | 292           | 6             | 183             | 0.88             |
| 2514.989 | 16         | O00193       | R.SASPPDDL   | SG[166.9984]A          | 2      | 2.127   | 1.70E-11       | 0.004     | 0              | 111.76    | 17              | 303           | 8             | 183             | 1.54             |
| 1340.468 | 7          | O00203       | K.NFYESDDQ   | NFYES[166.998          | 2      | -0.824  | 0.021          | 0.002     | 0              | 17.31     | 13              | 17            | 1             | 1094            | 1.41             |
| 1070.488 | 7          | O00231       | R.AQSLSTR    | EAQS[166.9984]E        | 2      | -1.021  | 0.031          | 6.00E-04  | 0              | 20.34     | 18              | 20            | 1             | 422             | 0.6              |
| 2375.94  | 6          | O00264       | K.EGEEPTVSD  | EGEEPTVYS[16           | 2      | 0.203   | 0.002          | 0.002     | 1              | 31.58     | 17              | 137           | 7             | 195             | 0.75             |
| 2115.85  | 14         | O00264       | R.GDQPAASGD  | GDQPAASGDS[2           |        | 2.172   | 1.10E-07       | 0.002     | 0              | 74.99     | 18              | 172           | 7             | 195             | 1.06             |
| 1817.7   | 7          | O00264       | K.EGEEPTVSD  | EGEEPTVYS[16           | 2      | 0.076   | 0.003          | 0.003     | 0              | 29.31     | 16              | 98            | 4             | 195             | 1.79             |
| 2115.85  | 24         | O00264       | R.GDQPAASGD  | GDQPAAS[166.3          | 3      | 1.224   | 6.30E-04       | 0.003     | 0              | 37.38     | 18              | 137           | 7             | 195             | 1.39             |
| 2035.884 | 12         | O00264       | R.GDQPAASGD  | GDQPAASGDS[2           |        | -0.185  | 0.004          | 2.00E-04  | 0              | 29.68     | 19              | 172           | 7             | 195             | 0.08             |
| 1737.734 | 13         | O00264       | K.EGEEPTVSD  | EGEEPTVSD[2            |        | -1.067  | 0.037          | 0.001     | 0              | 19.86     | 18              | 172           | 7             | 195             | 0.8              |
| 1328.644 | 13         | O00299       | K.NSNPALNDN  | NSNPALNDNLE            | 2      | -0.526  | 0.01           | 0.002     | 0              | 27.29     | 20              | 27            | 3             | 241             | 1.32             |
| 1841.866 | 8          | O00410       | R.NUIDEDGNN  | NUIDEDGNNQV            | 2      | 2.197   | 1.00E-05       | 0.002     | 0              | 55.78     | 18              | 56            | 1             | 1097            | 1.19             |
| 1051.518 | 6          | O00443       | K.VSNLQVSPK  | S[VSNLQVSPK]S          | 2      | -0.793  | 0.018          | 8.00E-04  | 0              | 23.61     | 19              | 24            | 2             | 1686            | 0.72             |
| 1658.742 | 11         | O00499       | K.SPSPPDGS   | SPS[166.9984]F         | 2      | -0.638  | 0.013          | 0.002     | 0              | 25.17     | 19              | 26            | 3             | 593             | 1                |
| 1738.708 | 6          | O00499       | K.SPSPPDGS   | SPS[166.9984]F         | 2      | -1.138  | 0.041          | 8.00E-04  | 0              | 19.17     | 18              | 26            | 3             | 593             | 0.48             |
| 1658.742 | 7          | O00499       | K.SPSPPDGS   | SPS[166.9984]F         | 2      | 0.26    | 0.002          | 0.002     | 0              | 34.15     | 19              | 79            | 4             | 593             | 1                |
| 1738.708 | 7          | O00499       | K.SPSPPDGS   | SPS[166.9984]F         | 2      | -0.292  | 0.006          | 8.00E-04  | 0              | 27.62     | 18              | 28            | 4             | 593             | 0.48             |
| 1685.722 | 9          | O00499       | K.DEQFEQCVQ  | DEQFEQCV[160.1         | 2      | 1.2     | 2.20E-04       | 0.002     | 0              | 42.58     | 18              | 107           | 7             | 593             | 1.18             |
| 2116.859 | 19         | O00505       | R.NVPQEESE   | NVPQEESEDS[2           |        | 0.708   | 6.70E-04       | 0.002     | 0              | 36.63     | 17              | 37            | 2             | 521             | 1.13             |
| 2116.859 | 18         | O00505       | R.NVPQEESE   | NVPQEESE[166.1         | 2      | -0.46   | 0.01           | 0.002     | 0              | 24.93     | 17              | 68            | 4             | 521             | 1.13             |
| 1231.606 | 6          | O00512       | R.IPVGGLSP   | IPVGLSP[166.1          | 2      | -1.062  | 0.036          | 0.001     | 0              | 20.93     | 19              | 53            | 4             | 1426            | 0.96             |
| 1205.483 | 7          | O00512       | R.SISADFDQR  | SIS[166.9984]A         | 2      | -0.045  | 0.003          | 2.00E-04  | 0              | 29.1      | 17              | 53            | 4             | 1426            | 0.16             |
| 1711.753 | 11         | O00512       | R.AVTPVQSGS  | AVT[181.014]P          | 2      | 0.672   | 6.20E-04       | 8.00E-04  | 0              | 39.27     | 20              | 66            | 3             | 1426            | 0.44             |
| 1641.675 | 9          | O00515       | R.QRTLEDEEQ  | QRT[181.014]U          | 3      | 1.291   | 4.00E-05       | 0.002     | 1              | 48.68     | 17              | 129           | 7             | 517             | 1.37             |
| 1385.558 | 7          | O00515       | R.NLSSTTDEA  | NLSST[181.014          | 2      | 2.159   | 1.70E-05       | 0.002     | 0              | 52.52     | 17              | 129           | 7             | 517             | 1.28             |
| 1459.541 | 7          | O00515       | K.EEEADMSSP  | EEADMSS[166.2          |        | 0.949   | 3.60E-04       | 0.002     | 0              | 36.04     | 14              | 129           | 7             | 517             | 1.34             |
| 1385.558 | 9          | O00515       | R.NLSSTTDEA  | NLS[166.9984]F         | 2      | 1.529   | 1.00E-04       | 0.002     | 0              | 44.84     | 17              | 109           | 7             | 517             | 1.28             |
| 703.317  | 4          | O00515,Q1469 | K.TISFR      | TIS[166.9984]F         | 2      | -0.928  | 0.029          | 8.00E-04  | 0              | 24.26     | 21              | 109           |               |                 | 1.2              |
| 1416.505 | 9          | O00566       | R.EEDGSEIEA  | EEDGS[166.998          | 2      | -1.108  | 0.038          | 0.002     | 0              | 18.5      | 17              | 18            | 1             | 681             | 1.57             |
| 1494.636 | 14         | O00567       | K.EEPLVSSG   | EEPLVSS[166.99         | 2      | 0.641   | 7.70E-04       | 0.002     | 0              | 35.96     | 17              | 40            | 4             | 594             | 1.38             |
| 2103.904 | 20         | O00567       | K.EEPLVSSG   | EEPLVSS[166.99         | 3      | 0.077   | 0.028          | 0.004     | 0              | 21.09     | 18              | 40            | 4             | 594             | 1.67             |
| 2103.904 | 16         | O00567       | K.EEPLVSSG   | EEPLVSS[166.998        | 3      | 0.204   | 0.021          | 0.004     | 0              | 22.38     | 18              | 34            | 3             | 594             | 1.67             |
| 1369.553 | 6          | O00571       | K.SFFSDRSG   | SFFSDRSGS[3            |        | 0.075   | 0.007          | 5.00E-04  | 1              | 24.56     | 15              | 25            | 3             | 662             | 0.34             |
| 878.356  | 4          | O00571,O1552 | R.FSGFGFAR   | D FS[166.9984]G        | 2      | -1.22   | 0.046          | 6.00E-04  | 0              | 13.35     | 13              | 13            |               |                 | 0.63             |
| 1300.639 | 8          | O00571,O1552 | R.DREALHQR   | DREALHQR               | 3      | 0.192   | 0.023          | 0.001     | 1              | 22.27     | 18              | 22            |               |                 | 0.81             |
| 2228.844 | 18         | O00629       | R.NVPHEDIC   | NVPHEDIC[160.2         |        | 0.468   | 0.001          | 0.001     | 0              | 35.21     | 18              | 63            | 3             | 521             | 0.63             |
| 2164.936 | 14         | O14497       | K.VSSPAPMEG  | VSS[166.9984]F         | 2      | 1.288   | 1.50E-04       | 0.003     | 0              | 44.43     | 19              | 67            | 4             | 2285            | 1.47             |
| 2595.125 | 35         | O14497       | K.HVTTAETG   | PCHVTTAETGPGT          | 3      | 1.224   | 0.002          | 0.001     | 0              | 33.96     | 19              | 49            | 3             | 2285            | 0.39             |
| 1223.988 | 11         | O14523       | K.EAGLSQSHD  | EAGLSQSHD[166.5        | 3      | 0.005   | 0.032          | 0.003     | 0              | 21.41     | 19              | 24            | 2             | 706             | 1.19             |
| 1366.636 | 12         | O14545       | R.ALPSLNTGS  | S[ALPSLNTGSS][2        |        | -0.157  | 0.004          | 0.002     | 0              | 29.98     | 19              | 46            | 3             | 582             | 1.82             |
| 1676.753 | 11         | O14545       | R.LDSQPQETS  | P LDSQPQETS[16         | 2      | 0.298   | 0.002          | 0.002     | 0              | 34.53     | 19              | 46            | 3             | 582             | 0.96             |
| 1618.686 | 10         | O14617       | K.HRPSAEDEE  | HRPS[166.9984          | 3      | 1.127   | 5.70E-04       | -1.00E-04 | 0              | 37.26     | 17              | 37            | 2             | 1153            | -0.09            |
| 1700.753 | 10         | O14639       | R.TLSPPTSAE  | GLS[166.9984]F         | 2      | 2.159   | 7.80E-07       | 0.002     | 0              | 66.05     | 17              | 85            | 4             | 778             | 1.17             |
| 1614.664 | 7          | O14639       | R.SSGREEDDE  | SS[166.9984]G          | 3      | -0.175  | 0.046          | 0.002     | 1              | 18.59     | 18              | 62            | 2             | 778             | 1.14             |
| 1437.648 | 7          | O14646       | R.ASSSGPRSP  | L ASSSGPRSP[166.2      |        | -1.065  | 0.034          | 0.001     | 1              | 19.9      | 18              | 20            | 1             | 1710            | 0.92             |
| 1137.566 | 5          | O14646       | K.SSPSLAVQR  | :SS[166.9984]P         | 2      | -1.169  | 0.042          | 0.002     | 0              | 18.84     | 18              | 25            | 3             | 1710            | 1.72             |
| 1144.519 | 5          | O14681       | K.FPSPHPSP   | AK.FPSPHPSP[166.9984]F | 2      | -1.172  | 0.046          | 0.003     | 0              | 15.83     | 15              | 26            | 2             | 340             | 2.65             |
| 1224.485 | 7          | O14681       | K.FPSPHPSP   | AK.FPSPHPSP[166.9984]F | 2      | -0.105  | 0.004          | 0.002     | 0              | 24.5      | 13              | 26            | 2             | 340             | 1.31             |
| 1195.503 | 4          | O14686       | K.SPDTGPDW   | L[S[166.9984]P]D       | 2      | -0.781  | 0.017          | 0.002     | 0              | 21.74     | 17              | 42            | 5             | 5537            | 1.43             |
| 1882.727 | 8          | O14686       | K.QTAGQGSQ   | P QTAGQGS[166.2        |        | 0.858   | 4.00E-04       | 0.002     | 0              | 37.13     | 16              | 42            | 5             | 5537            | 0.96             |
| 2235.99  | 17         | O14686       | K.LEGPVSPD   | VELEGPVSP[166.99       | 3      | 0.299   | 0.017          | 0.001     | 1              | 24.33     | 19              | 37            | 7             | 5537            | 0.44             |
| 1663.773 | 5          | O14686       | K.ASEPLSPPP  | F ASEPLSP[166.9        | 2      | -0.661  | 0.016          | 0.003     | 0              | 22.93     | 17              | 42            | 3             | 5537            | 1.74             |
| 1283.366 | 6          | O14737       | K.VMDSDEDD   | VMD[166.998.2          |        | -0.132  | 0.004          | 0.002     | 0              | 24.21     | 13              | 24            | 1             | 125             | 1.53             |
| 1872.958 | 9          | O14745       | R.EALAEAAE   | SEI EALAEAAE[13        | 3      | 1.291   | 2.30E-04       | 0.003     | 0              | 41.14     | 17              | 112           | 3             | 358             | 1.37             |
| 1958.786 | 10         | O14745       | R.SASSDTSEL  | L SASSDTSEL[166.9984]E | 2      | 2.159   | 5.00E-09       | 0.002     | 0              | 87.44     | 17              | 112           | 3             | 358             | 0.8              |
| 1958.786 | 9          | O14745       | R.SASSDTSEL  | L SASSDT[181.01        | 2      | 2.172   | 9.50E-         |           |                |           |                 |               |               |                 |                  |

|          |    |        |                                 |        |          |           |   |       |    |     |    |      |       |
|----------|----|--------|---------------------------------|--------|----------|-----------|---|-------|----|-----|----|------|-------|
| 1662.785 | 8  | O15021 | R.KHSLEVTQEE' KHS[166.9984] 3   | 0.084  | 0.025    | 0.001     | 1 | 21.18 | 18 | 21  | 7  | 2626 | 0.86  |
| 2646.042 | 18 | O15027 | R.FTGSFDDDPD FT[181.014]GSI 3   | 0.801  | 0.005    | 0.002     | 1 | 28.33 | 18 | 98  | 6  | 2179 | 0.84  |
| 2363.003 | 15 | O15027 | K.QIDSSPVGGE QIDSS[166.998- 2   | 2.159  | 1.10E-07 | 0.002     | 0 | 76.12 | 19 | 98  | 6  | 2179 | 0.69  |
| 2363.003 | 11 | O15027 | K.QIDSSPVGGE QIDSSPVGGET[ 3     | 0.706  | 0.006    | 0.002     | 0 | 28.38 | 19 | 98  | 6  | 2179 | 0.98  |
| 1972.926 | 17 | O15027 | R.ADSGPTQPPL ADSSGPTQPPLS 2     | -0.984 | 0.03     | 0.001     | 0 | 20.71 | 18 | 98  | 6  | 2179 | 0.7   |
| 2363.003 | 10 | O15027 | K.QIDSSPVGGE QIDS[166.9984 2    | 2.127  | 2.30E-07 | 0.002     | 0 | 73    | 19 | 103 | 7  | 2179 | 0.69  |
| 2646.042 | 17 | O15027 | R.FTGSFDDDPD FTGS[166.9984 3    | 1.021  | 0.003    | 0.002     | 1 | 30.57 | 18 | 101 | 8  | 2179 | 0.84  |
| 1585.595 | 14 | O15027 | R.FTGSFDDDPD FTGS[166.9984 3    | 0.981  | 0.003    | 0.002     | 0 | 27.16 | 15 | 91  | 7  | 2179 | 1.19  |
| 2595.019 | 12 | O15033 | R.RPSTAVDEED RPSTAVDEEDEF 3     | 0.068  | 0.028    | 7.00E-04  | 0 | 21.04 | 18 | 21  | 2  | 823  | 0.25  |
| 1401.666 | 9  | O15042 | K.LYSILQGDSP T LYSILQGDSS[166 2 | -0.388 | 0.007    | 0.002     | 0 | 28.65 | 20 | 29  | 1  | 1029 | 1.06  |
| 2581.12  | 12 | O15047 | R.SGSPAPETTN SGS[166.9984] 3    | 0.186  | 0.024    | 0.002     | 0 | 21.18 | 17 | 31  | 2  | 1707 | 0.81  |
| 2304.962 | 17 | O15047 | K.RPRPSTPAEEI RPRPST[181.01 3   | 0.608  | 0.008    | 0.001     | 0 | 27.4  | 19 | 31  | 2  | 1707 | 0.54  |
| 2304.962 | 18 | O15047 | K.RPRPSTPAEEI RPRPST[166.998 3  | 0.258  | 0.017    | 0.001     | 0 | 23.94 | 19 | 24  | 5  | 1707 | 0.54  |
| 1349.61  | 7  | O15075 | K.SPSPSPSPSGS SPSPSPST[181.0 2  | -0.758 | 0.02     | 0.001     | 0 | 22.97 | 18 | 23  | 3  | 740  | 0.83  |
| 1349.61  | 6  | O15075 | K.SPSPSPSPSGS SPSPSPST[166. 2   | -0.64  | 0.015    | 0.001     | 0 | 24.15 | 18 | 24  | 3  | 740  | 0.83  |
| 1836.849 | 16 | O15143 | K.KASSEGGTAA KAS[166.9984] 3    | 1.291  | 4.30E-04 | 0.001     | 1 | 39.69 | 19 | 40  | 1  | 372  | 0.64  |
| 1836.849 | 18 | O15143 | K.KASSEGGTAA KASSEGGT[181 3     | 0.793  | 0.005    | 0.001     | 1 | 29.27 | 19 | 29  | 1  | 372  | 0.64  |
| 1291.629 | 14 | O15155 | K.SLSIEIGHEVK SLS[166.9984] 2   | -1.001 | 0.033    | 0.002     | 0 | 20.54 | 18 | 21  | 1  | 118  | 1.37  |
| 2159.927 | 26 | O15173 | R.LLKGEEPESEY LKPGEEPESEY 3     | 0.672  | 0.007    | 0.003     | 0 | 27.06 | 18 | 93  | 3  | 223  | 1.56  |
| 1777.812 | 22 | O15173 | R.GLGAGAGAG GILGAGAGAGEI 2      | 0.133  | 0.002    | 1.00E-04  | 0 | 34.68 | 19 | 74  | 2  | 223  | 0.05  |
| 2159.927 | 16 | O15173 | R.LLKGEEPESEY LKPGEEPESEY 2     | 2.159  | 5.90E-06 | 0.001     | 0 | 57.83 | 18 | 74  | 2  | 223  | 0.54  |
| 1087.482 | 5  | O15173 | R.DFSLEQLR.Q DFS[166.9984] 2    | -0.407 | 0.008    | 0.001     | 0 | 28.46 | 20 | 112 | 5  | 223  | 0.97  |
| 2910.168 | 6  | O15231 | R.RSSTSGDTEEI RSSTSGDGT[181. 3  | 1.224  | 0.002    | 0.003     | 1 | 34.26 | 18 | 265 | 16 | 689  | 1.17  |
| 2754.067 | 10 | O15231 | R.RSSTSGDTEEI RSSTSGDGT[181.0 3 | 1.033  | 0.003    | 0.002     | 0 | 29.65 | 17 | 296 | 16 | 689  | 0.55  |
| 3473.524 | 30 | O15231 | R.GGQGDPAVP GGQGDPAVPT 3        | 1.291  | 5.50E-04 | 0.003     | 0 | 37.56 | 17 | 296 | 16 | 689  | 0.76  |
| 2910.168 | 20 | O15231 | R.RSSTSGDTEEI RSST[181.014] 3   | 1.291  | 0.001    | 0.003     | 1 | 34.63 | 18 | 296 | 16 | 689  | 1.17  |
| 2910.168 | 7  | O15231 | R.RSSTSGDTEEI RSST[166.998- 3   | 0.501  | 0.011    | 0.003     | 1 | 25.35 | 18 | 235 | 15 | 689  | 1.17  |
| 1751.731 | 9  | O15231 | R.RESCGSSVLT RES[166.9984] 2    | 2.159  | 1.50E-05 | 0.003     | 1 | 53.61 | 18 | 296 | 16 | 689  | 1.48  |
| 3553.49  | 26 | O15231 | R.GGQGDPAVP GGQGDPAVPT 3        | 1.224  | 3.10E-04 | 0.003     | 0 | 39.94 | 17 | 265 | 16 | 689  | 0.74  |
| 3490.527 | 11 | O15231 | R.GGQGDPAVP GGQGDPAVPAI 3       | 1.291  | 8.20E-04 | 0.002     | 1 | 35.8  | 17 | 296 | 16 | 689  | 0.72  |
| 3473.524 | 26 | O15231 | R.GGQGDPAVP GGQGDPAVPT 3        | 1.291  | 1.10E-05 | 0.002     | 0 | 54.59 | 18 | 296 | 16 | 689  | 0.47  |
| 2154.945 | 10 | O15231 | R.GGQGDPAVP GGQGDPAVPAI 3       | 0.907  | 0.004    | 0.003     | 0 | 29.39 | 18 | 296 | 16 | 689  | 1.41  |
| 1751.731 | 9  | O15231 | R.RESCGSSVLT RES[160.0307 3     | 1.256  | 7.70E-04 | 0.003     | 1 | 36.46 | 18 | 235 | 15 | 689  | 1.77  |
| 2754.067 | 5  | O15231 | R.RSSTSGDTEEI RSST[166.9984] 3  | -0.008 | 0.034    | 0.002     | 0 | 19.26 | 17 | 265 | 16 | 689  | 0.55  |
| 1354.6   | 10 | O15231 | R.QSSPGSEQL' OSS[166.9984] 2    | 2.159  | 1.80E-05 | 0.002     | 0 | 53.95 | 19 | 296 | 16 | 689  | 1.3   |
| 3553.49  | 23 | O15231 | R.GGQGDPAVP GGQGDPAVPT 3        | 1.193  | 2.70E-05 | 0.003     | 0 | 50.59 | 17 | 252 | 16 | 689  | 0.74  |
| 3473.524 | 15 | O15231 | R.GGQGDPAVP GGQGDPAVPT 3        | -0.182 | 0.045    | 0.002     | 0 | 18.54 | 18 | 252 | 16 | 689  | 0.47  |
| 3490.527 | 13 | O15231 | R.GGQGDPAVP GGQGDPAVPAI 3       | 1.127  | 2.20E-04 | 0.002     | 1 | 41.5  | 17 | 268 | 17 | 689  | 0.72  |
| 2754.067 | 14 | O15231 | R.RSSTSGDTEEI RSST[181.014] 3   | 1.342  | 1.00E-04 | 0.002     | 0 | 44.44 | 17 | 223 | 13 | 689  | 0.55  |
| 1595.63  | 5  | O15231 | R.RESCGSSVLT RES[160.0307] 2    | -1.048 | 0.035    | 0.003     | 0 | 19.05 | 17 | 223 | 13 | 689  | 2.07  |
| 1595.63  | 9  | O15231 | R.RESCGSSVLT RES[166.9984] 2    | -1.157 | 0.045    | 0.003     | 0 | 17.96 | 17 | 235 | 15 | 689  | 2.07  |
| 2154.945 | 7  | O15231 | R.GGQGDPAVP GGQGDPAVPAI 3       | 1.256  | 3.40E-04 | 0.003     | 0 | 40.53 | 18 | 235 | 15 | 689  | 1.41  |
| 2990.135 | 21 | O15231 | R.RSSTSGDTEEI RSST[166.998- 3   | 0.116  | 0.026    | 0.002     | 1 | 20.52 | 17 | 317 | 18 | 689  | 0.66  |
| 2910.168 | 19 | O15231 | R.RSSTSGDTEEI RSST[166.9984] 3  | 1.2    | 1.90E-04 | 0.003     | 1 | 43.11 | 18 | 317 | 18 | 689  | 1.17  |
| 2990.135 | 6  | O15231 | R.RSSTSGDTEEI RSST[166.9984] 3  | -0.137 | 0.046    | 0.002     | 1 | 17.98 | 17 | 326 | 16 | 689  | 0.66  |
| 3490.527 | 7  | O15231 | R.GGQGDPAVP GGQGDPAVPAI 3       | 1.205  | 1.50E-04 | 0.002     | 1 | 43.06 | 17 | 224 | 14 | 689  | 0.72  |
| 3490.527 | 12 | O15231 | R.GGQGDPAVP GGQGDPAVPAI 3       | 1.204  | 1.10E-04 | 0.002     | 1 | 44.68 | 17 | 263 | 15 | 689  | 0.72  |
| 3553.49  | 16 | O15231 | R.GGQGDPAVP GGQGDPAVPT 3        | 1.205  | 7.70E-06 | 0.003     | 0 | 55.98 | 17 | 224 | 14 | 689  | 0.74  |
| 2502.176 | 21 | O15234 | R.LEQTSVRDPSI LEQTSVRDPSI 3     | 1.291  | 8.00E-06 | 0.003     | 1 | 56.81 | 18 | 90  | 6  | 703  | 1.19  |
| 2415.031 | 14 | O15234 | K.STVTGERQSG STVTGERQSG[16 3    | 1.291  | 8.00E-04 | 0.003     | 1 | 36.08 | 18 | 90  | 6  | 703  | 1.39  |
| 1859.734 | 9  | O15234 | R.GGSGCSGSAI GGSGC[160.03 2     | -1.136 | 0.042    | 0.002     | 0 | 18.19 | 17 | 91  | 8  | 703  | 0.85  |
| 2415.031 | 8  | O15234 | K.STVTGERQSG STVT[181.014] 2    | -0.338 | 0.006    | 0.003     | 1 | 27.15 | 18 | 93  | 6  | 703  | 1.39  |
| 1859.734 | 6  | O15234 | R.GGSGCSGSAI GGSGC[160.03 2     | -0.328 | 0.007    | 0.002     | 0 | 26.25 | 17 | 75  | 6  | 703  | 0.85  |
| 1859.734 | 11 | O15234 | R.GGSGCSGSAI GGSGC[166.998- 2   | -0.977 | 0.027    | 0.002     | 0 | 19.76 | 17 | 98  | 7  | 703  | 1.12  |
| 1852.776 | 16 | O15234 | R.YGSPPPQRPDI YGS[166.9984] 3   | 0.32   | 0.014    | -5.00E-04 | 1 | 24.54 | 19 | 75  | 6  | 703  | -0.29 |
| 1368.579 | 4  | O15344 | K.ASVSGPNSPS ASVSGPNSPS1 2      | -1.049 | 0.039    | 0.003     | 0 | 18.09 | 16 | 18  | 1  | 667  | 2.27  |
| 1368.579 | 8  | O15344 | K.ASVSGPNSPS ASVSGPNSPS[166 2   | -0.606 | 0.014    | 0.003     | 0 | 22.47 | 16 | 22  | 1  | 667  | 2.27  |
| 2128.928 | 18 | O15355 | R.KLEEVLTGEG KLEEVLT[181. 3     | 1.256  | 8.50E-05 | 0.003     | 1 | 45.7  | 17 | 149 | 6  | 546  | 1.13  |
| 2000.833 | 12 | O15355 | K.LEEVLTGEGAI LEEVLS[166.99 2   | 2.159  | 1.40E-07 | 0.001     | 0 | 75.31 | 19 | 143 | 6  | 546  | 0.66  |
| 2128.928 | 15 | O15355 | R.KLEEVLTGEGAI KLEEVLS[166.9 2  | 2.159  | 7.10E-07 | 0.002     | 1 | 66.54 | 18 | 143 | 6  | 546  | 0.69  |
| 2128.928 | 14 | O15355 | K.LEEVLTGEGAI LEEVLT[181.0 3    | 0.022  | 0.035    | 0.003     | 1 | 19.55 | 17 | 163 | 5  | 546  | 1.3   |
| 1702.732 | 9  | O15357 | R.DASDGEDKFI DAS[166.9984] 3    | -0.086 | 0.039    | -7.00E-04 | 0 | 18.46 | 17 | 18  | 3  | 1258 | -0.39 |
| 1348.578 | 9  | O15427 | K.NGVEVHTPETI NGVEVHTPETS 2     | -0.39  | 0.007    | 0.001     | 0 | 26.65 | 18 | 27  | 1  | 465  | 0.99  |
| 1945.854 | 8  | O15439 | K.DNNEESEQPPV DNNEESEQPPVM 2    | -0.037 | 0.003    | 0.001     | 0 | 31.18 | 19 | 31  | 2  | 1325 | 0.73  |
| 2073.949 | 9  | O15439 | K.DNNEESEQPPV DNNEESEQPPVI 3    | -0.074 | 0.043    | 0.003     | 1 | 19.62 | 18 | 24  | 2  | 1325 | 1.48  |
| 2121.995 | 16 | O15446 | K.QEQINTEPLEI QEQINTEPLEDT 3    | -0.077 | 0.041    | 0.003     | 0 | 20.55 | 19 | 50  | 3  | 510  | 1.45  |
| 2121.995 | 8  | O15446 | K.QEQINTEPLEI QEQINTEPLEDT 2    | 1.712  | 5.90E-05 | 0.001     | 0 | 48.67 | 19 | 50  | 3  | 510  | 0.56  |
| 1418.595 | 6  | O15551 | R.STGPGASLGT ST[181.014]GPI 2   | -0.239 | 0.006    | 0.001     | 0 | 28.15 | 18 | 28  | 1  | 220  | 0.94  |
| 2320.009 | 7  | O43149 | R.GDREEVERP GDREEVERPV 3        | -0.133 | 0.045    | 0.002     | 1 | 20.03 | 19 | 20  | 1  | 2961 | 0.66  |
| 2112.898 | 10 | O43164 | K.SSAGDTEFVH SAGDTEFVHQ 3       | 0.036  | 0.033    | 0.002     | 0 | 18.7  | 16 | 19  | 3  | 708  | 0.8   |
| 1536.719 | 8  | O43166 | K.LIDLESPTPEK LIDLES[166.998 2  | 1.195  | 1.90E-04 | 0.002     | 0 | 42.5  | 18 | 58  | 5  | 1804 | 1.32  |
| 1492.631 | 9  | O43166 | R.TLSDSIYNSG TLS[166.9984] 2    | 0.345  | 0.001    | 5.00E-04  | 0 | 34    | 18 | 58  | 5  | 1804 | 0.33  |
| 1536.719 | 8  | O43166 | K.LIDLESPTPEK LIDLESPT[181.0 2  | 1.797  | 4.90E-05 | 0.002     | 0 | 48.52 | 18 | 51  | 7  | 1804 | 1.32  |
| 1178.473 | 8  | O43166 | K.SETGDSIFR.I S[166.9984]ET 2   | -0.93  | 0.025    | 0.001     | 0 | 20.25 | 17 | 51  | 7  | 1804 | 1.09  |
| 1393.599 | 9  | O43166 | R.SKSETGDSIFR.S[166.9984]E 2    | -0.537 | 0.012    | 0.002     | 1 | 25.18 | 18 | 80  | 4  | 1804 | 1.15  |
| 2252.826 | 15 | O43237 | K.DFQDYMEPEI DFQDYMEPEEC 3      | 1.256  | 4.90E-05 | 0.004     | 0 | 46.64 | 16 | 87  | 5  | 492  | 1.54  |
| 2408.927 | 8  | O43237 | K.DFQDYMEPEI DFQDYMEPEEC 3      | -0.135 | 0.043    | 0.004     | 1 | 17.99 | 17 | 55  | 5  | 492  | 1.65  |
| 1494.684 | 14 | O43237 | R.GGPASVPSSS GGPASVPSSS[1 2     | -0.76  | 0.018    | 0.002     | 0 | 22.95 | 18 | 66  | 5  | 492  | 1.41  |
| 1842.738 | 9  | O43278 | K.NNFEEOQQCI NNFEEOQQCI 2       | -0.154 | 0.005    | -8.00E-04 | 0 | 26.99 | 16 | 27  | 1  | 529  | -0.44 |
| 1285.565 | 5  | O43291 | R.SHDFCLVSK.V S[166.9984]HC 2   | -1.133 | 0.04     | 0.002     | 0 | 19.2  | 18 | 19  | 0  | 252  | 1.67  |
| 1645.611 | 11 | O43395 | K.GDDDESDDE GDDDEES[166. 2      | 1.618  | 7.40E-05 | 0.002     | 1 | 44.73 | 16 | 76  | 3  | 683  | 1.38  |
| 1517.516 | 11 | O43395 | K.GDDDESDDE GDDDEES[166. 2      | 1.746  | 6.00E-05 | 9.00E-04  | 0 | 45.01 | 15 | 64  | 3  | 683  | 0.61  |
| 1983.909 | 11 | O43399 | K.GLLSDSMTDV GLLSDSMT[181 2     | 0.338  | 0.001    | 0.003     | 0 | 34.91 | 19 | 35  | 1  | 206  | 1.71  |
| 2067.901 | 8  | O43493 | K.TESGTEEDLUS TES[166.9984] 2   | -1.179 | 0.046    | 0.002     | 0 | 19.74 | 19 | 20  | 2  | 480  | 0.85  |
| 1600.685 | 16 | O43566 | K.SLGSSTGESESI S[166.9984]G 2   | -0.646 | 0.013    | 0.002     | 0 | 24.09 | 18 | 24  | 1  | 566  | 1.31  |
| 1600.685 | 15 | O43566 | K.SLGSSTGESESI S[166.9984 2     | 0.038  | 0.003    | 0.002     | 0 | 30.91 | 18 | 31  | 1  | 566  | 1.31  |
| 1942.811 | 13 | O43598 | R.YFEADPPGQI YFEADPPGQVA 2      | 0.528  | 8.30E-04 | 0.002     | 0 | 36.83 | 19 | 37  | 1  | 174  | 1.11  |

|          |    |              |                                 |        |          |          |   |       |    |     |    |      |       |
|----------|----|--------------|---------------------------------|--------|----------|----------|---|-------|----|-----|----|------|-------|
| 2458.029 | 17 | O60229       | K.SFDLGSPPKGI S[166.9984]FDI 3  | -0.11  | 0.039    | 0.002    | 0 | 19,24 | 18 | 19  | 2  | 2985 | 1.04  |
| 938.45   | 4  | O60229,07596 | K.WLTSRVR.R WLTS[166.9984] 2    | -0.211 | 0.005    | 8.00E-04 | 0 | 27,44 | 17 | 49  |    |      | 0.81  |
| 1870.749 | 7  | O60231       | K.QQTEKPESED QQTEKPE[166.9 2    | -0.06  | 0.004    | 0.005    | 0 | 28,98 | 17 | 29  | 1  | 1041 | 2.75  |
| 1789.377 | 15 | O60231       | R.LLDESESEEE LLED[166.9984] 2   | -0.986 | 0.033    | 4.00E-04 | 0 | 19,69 | 17 | 25  | 3  | 1041 | 0.23  |
| 1768.691 | 6  | O60238       | R.DHSSQSEEEV DHSQS[166.95 2     | -0.931 | 0.024    | -0.001   | 0 | 20,24 | 17 | 20  | 2  | 219  | -0.56 |
| 2174.917 | 10 | O60238       | K.NGGLEHVPS NGGLEHVPS[16 3      | 0.477  | 0.012    | 0.002    | 0 | 24,12 | 17 | 72  | 2  | 219  | 0.68  |
| 2174.917 | 18 | O60238       | K.NGGLEHVPS NGGLEHVPS[16 3      | 0.501  | 0.011    | 0.002    | 0 | 24,37 | 17 | 24  | 1  | 219  | 0.68  |
| 1454.623 | 8  | O60244       | R.KLSDOPCPVE KLS[166.9984]C 2   | -0.846 | 0.023    | 0.002    | 1 | 21,09 | 17 | 21  | 1  | 1454 | 1.33  |
| 1029.407 | 5  | O60245       | K.LSDSPMGR.L LSDS[166.9984] 2   | -0.768 | 0.017    | 4.00E-04 | 0 | 20,85 | 16 | 21  | 2  | 1069 | 0.42  |
| 1244.567 | 6  | O60264       | K.QNLLSVDYR QNLLS[166.998 2     | -0.343 | 0.006    | 0.003    | 0 | 29,12 | 20 | 29  | 3  | 1052 | 2.27  |
| 1945.876 | 15 | O60271       | K.LHQLSGSDQL LHQLSG[166.9 3     | 1.567  | 8.00E-04 | 0.002    | 0 | 37,99 | 20 | 38  | 5  | 1321 | 0.91  |
| 1945.876 | 18 | O60271       | K.LHQLSGSDQL LHQLSG[166.99 3    | 1.257  | 0.002    | 0.002    | 0 | 34,92 | 20 | 35  | 2  | 1321 | 0.91  |
| 1368.652 | 8  | O60271       | K.RSSTLSQLPGI RSS[166.9984] 2   | -0.848 | 0.015    | 5.00E-04 | 1 | 24,06 | 18 | 40  | 4  | 1321 | 0.39  |
| 1368.652 | 4  | O60271       | K.RSSTLSQLPGI RSS[181.014] 2    | -1.072 | 0.039    | 5.00E-04 | 1 | 19,82 | 18 | 50  | 5  | 1321 | 0.39  |
| 2049.87  | 8  | O60291       | R.AASIENLQD AASIENVLQDSS 3      | -0.031 | 0.035    | 0.002    | 0 | 20,03 | 18 | 20  | 1  | 552  | 1.2   |
| 1563.621 | 5  | O60291       | R.SPSSPIHEEDE SPSS[166.9984] 2  | -1.011 | 0.03     | 2.00E-04 | 0 | 18,42 | 16 | 18  | 2  | 552  | 0.13  |
| 2212.958 | 12 | O60292       | R.AHSLGGLDPA AHSLGGLDPAF 3      | 0.566  | 0.009    | 0.003    | 0 | 27,98 | 20 | 34  | 3  | 1781 | 1.52  |
| 1796.802 | 7  | O60292       | R.TTPTMSEPP TT[181.014]PTI 2    | -0.549 | 0.011    | 0.003    | 0 | 25,06 | 18 | 34  | 3  | 1781 | 1.69  |
| 2132.833 | 11 | O60292       | R.SSEITLSECD, SSS[166.9984]E 2  | 0.208  | 0.002    | 0.002    | 0 | 30,63 | 16 | 31  | 4  | 1781 | 0.78  |
| 2212.958 | 11 | O60292       | R.AHSLGGLDPA AHSLGGLDPAF 3      | 0.02   | 0.031    | 0.003    | 0 | 22,55 | 20 | 41  | 4  | 1781 | 1.52  |
| 2132.833 | 14 | O60292       | R.SSEITLSECD, SS[166.9984]SE 2  | 2.025  | 3.70E-06 | 0.002    | 0 | 57,84 | 16 | 82  | 5  | 1781 | 0.78  |
| 1320.62  | 7  | O60292       | R.EVSPAPAVAC EVS[166.9984] 2    | -0.768 | 0.019    | 0.003    | 0 | 22,85 | 18 | 41  | 4  | 1781 | 2.12  |
| 1328.646 | 11 | O60293       | R.RISTSDILSEK, RIS[166.9984]T 2 | -0.084 | 0.004    | 0.002    | 1 | 31,71 | 20 | 32  | 4  | 1989 | 1.35  |
| 2460.108 | 20 | O60318       | K.KPGDGEVSPS KPGDGEVPS[166 3    | 0.286  | 0.019    | 0.002    | 0 | 23,18 | 18 | 23  | 1  | 1980 | 0.9   |
| 2460.108 | 16 | O60318       | K.KPGDGEVSPS KPGDGEVPS[1 3      | 0.807  | 0.006    | 0.002    | 0 | 28,42 | 18 | 28  | 1  | 1980 | 0.9   |
| 2460.108 | 27 | O60318       | K.KPGDGEVSPS KPGDGEVSPST[ 3     | 0.622  | 0.009    | 0.002    | 0 | 26,57 | 18 | 27  | 1  | 1980 | 0.9   |
| 1246.459 | 7  | O60333       | K.MSDTGSPPGM MSDTGS[166.9 2     | 2.119  | 1.00E-05 | 0.002    | 0 | 50,66 | 13 | 62  | 4  | 1816 | 1.37  |
| 1083.508 | 6  | O60333       | R.SGLSLEELR.L SGLS[166.9984] 2  | -0.507 | 0.01     | 0.001    | 0 | 27,48 | 20 | 62  | 4  | 1816 | 1.25  |
| 3478.532 | 25 | O60341       | K.LPPPPQAPPI LPPPPQAPPEE 4      | -0.244 | 0.029    | 0.001    | 0 | 22,72 | 20 | 23  | 2  | 852  | 0.35  |
| 1512.615 | 6  | O60343       | K.SPSPMQQDD SPS[166.9984]V 2    | 0.433  | 0.001    | 0.001    | 0 | 33,88 | 17 | 34  | 3  | 1298 | 0.7   |
| 1512.615 | 8  | O60343       | K.SPSPMQQDD S[166.9984]PSV 2    | 0.48   | 0.001    | 0.001    | 0 | 34,35 | 17 | 36  | 4  | 1298 | 0.7   |
| 1656.701 | 10 | O60343       | R.HASAPSHVQF HASAPS[166.95 3    | -0.11  | 0.047    | 0.002    | 0 | 18,24 | 17 | 35  | 3  | 1298 | 1.43  |
| 1656.701 | 12 | O60343       | R.HASAPSHVQF HAS[166.9984] 3    | 0.317  | 0.018    | 0.002    | 0 | 22,5  | 17 | 42  | 5  | 1298 | 1.43  |
| 1754.705 | 11 | O60353       | R.EQDCGEPASF EQDC[160.030] 2    | 1.622  | 7.00E-05 | 0.002    | 0 | 46,77 | 18 | 47  | 1  | 706  | 1.09  |
| 1149.53  | 11 | O60361,P2239 | R.NIHGSDSVK, NIHGS[166.99] 2    | -1.081 | 0.039    | 0.001    | 0 | 20,72 | 19 | 21  |    |      | 1.07  |
| 1651.702 | 10 | O60437       | K.NNGESWELW NNGESWELMD 2        | 1.756  | 6.10E-05 | 0.003    | 0 | 47,11 | 17 | 47  | 2  | 1756 | 1.67  |
| 1654.768 | 5  | O60447       | K.LEEQNRLLLETT LEEQNRLLLETT[ 2  | -1.088 | 0.036    | 0.002    | 1 | 19,67 | 18 | 20  | 1  | 810  | 1.01  |
| 2965.161 | 19 | O60502       | K.SPSPMQQDD S[166.9984]PEI 3    | 0.46   | 0.012    | 0.003    | 0 | 23,95 | 17 | 24  | 1  | 916  | 1.12  |
| 1590.716 | 12 | O60504       | R.SPAPDIDLGG SPADPIDLGGQ[ 2     | 2.119  | 5.40E-08 | 0.002    | 0 | 78,42 | 18 | 108 | 3  | 671  | 1.3   |
| 1535.656 | 8  | O60504       | R.LCDDGQPLPT LC[160.0307]DI 2   | 2.172  | 6.20E-06 | 0.002    | 0 | 58,01 | 18 | 107 | 4  | 671  | 1.44  |
| 1746.817 | 9  | O60504       | R.SPAPDIDLGG SPADPIDLGGQ[ 2     | -0.444 | 0.009    | 0.002    | 1 | 26,11 | 18 | 127 | 3  | 671  | 0.95  |
| 1746.817 | 11 | O60504       | R.SPAPDIDLGG SPADPIDLGGQ[ 2     | -0.552 | 0.012    | 0.002    | 1 | 25,01 | 18 | 107 | 3  | 671  | 0.95  |
| 1638.762 | 16 | O60524       | K.KLPSDSDLEJ, KLPS[166.9984] 2  | 2.159  | 9.50E-07 | 0.002    | 1 | 67,51 | 20 | 89  | 2  | 1076 | 1.47  |
| 1638.762 | 6  | O60524       | K.KLPSDSDLEJ, KLPS[166.99] 3    | 0.773  | 0.005    | 0.002    | 1 | 30,07 | 20 | 74  | 2  | 1076 | 1.23  |
| 1446.699 | 4  | O60658       | R.RLSGNEYVLV, RLS[166.9984]C 2  | -0.934 | 0.026    | 0.002    | 1 | 22,21 | 19 | 22  | 2  | 829  | 1.52  |
| 1273.549 | 15 | O60664       | K.VSQAQEMVS, VVS[166.9984]G 2   | 0.914  | 3.60E-04 | 0.002    | 0 | 37,69 | 16 | 38  | 1  | 434  | 1.67  |
| 2053.792 | 16 | O60716       | R.HYEDGYPGG, HYEDGYPGGSD 2      | 1.658  | 7.00E-05 | 9.00E-04 | 0 | 47,13 | 18 | 229 | 13 | 968  | 0.42  |
| 1226.614 | 9  | O60716       | R.GSLASLDSLR, GSLASLDS[166. 2   | -1.072 | 0.035    | 9.00E-04 | 1 | 19,83 | 18 | 229 | 13 | 968  | 0.73  |
| 1444.622 | 10 | O60716       | K.SDFQVNLNN, S[166.9984]DF 2    | 0.809  | 4.40E-04 | 5.00E-04 | 0 | 38,64 | 18 | 229 | 13 | 968  | 0.33  |
| 1726.772 | 9  | O60716       | R.TLDRSGLDGLD, TLDRS[166.99 2   | 0.152  | 0.002    | 0.003    | 1 | 34,07 | 20 | 195 | 13 | 968  | 1.55  |
| 1226.614 | 9  | O60716       | R.GSLASLDSLR, GSLAS[166.99 2    | -0.402 | 0.007    | 0.002    | 1 | 26,53 | 18 | 229 | 13 | 968  | 1.38  |
| 2053.792 | 8  | O60716       | R.HYEDGYPGG, HYEDGYPGGSD 2      | 0.525  | 9.50E-04 | 9.00E-04 | 0 | 35,8  | 18 | 195 | 13 | 968  | 0.42  |
| 1098.519 | 8  | O60716       | R.GSLASLDSLR, GS[166.9984]U 2   | 0.735  | 6.40E-04 | 0.001    | 0 | 38,9  | 19 | 229 | 13 | 968  | 1.32  |
| 1106.499 | 6  | O60716       | R.VGGSSVDLHF, VGGSS[166.99] 2   | 0.445  | 0.001    | 0.001    | 0 | 37    | 20 | 229 | 13 | 968  | 0.98  |
| 1098.519 | 8  | O60716       | R.GSLASLDSLR, GSLAS[166.99 2    | 1.881  | 4.60E-05 | 0.001    | 0 | 50,36 | 19 | 196 | 13 | 968  | 1.32  |
| 1106.499 | 8  | O60716       | R.VGGSSVDLHF, VGGSS[166.99] 2   | 0.278  | 0.002    | 0.001    | 0 | 34,33 | 19 | 217 | 14 | 968  | 1.07  |
| 1241.512 | 7  | O60716       | R.SDGLDGMEP, S[166.9984]GD 2    | 0.496  | 9.90E-04 | 0.001    | 0 | 34,51 | 17 | 196 | 13 | 968  | 1.1   |
| 1489.595 | 9  | O60716       | K.SLDNNYSTPN, S[166.9984]LD 2   | -0.414 | 0.008    | 0.002    | 0 | 27,4  | 19 | 183 | 13 | 968  | 1.37  |
| 1306.58  | 7  | O60716       | R.GSLASLDSLR, GSLAS[166.99 2    | -0.744 | 0.018    | 0.002    | 1 | 24,09 | 19 | 248 | 14 | 968  | 1.73  |
| 2000.86  | 8  | O60716       | R.SQSSHSYDSS, SQSSHSY[243.0 3   | -0.09  | 0.036    | 0.006    | 0 | 20,46 | 19 | 263 | 16 | 968  | 2.85  |
| 1202.527 | 10 | O60749       | K.SMSAPVIFDR, SMS[166.9984] 2   | 0.245  | 0.002    | 0.002    | 0 | 32    | 17 | 32  | 1  | 519  | 1.81  |
| 3323.239 | 33 | O60763       | K.DLGHVPEEED DLGHVPEEED 3       | 1.224  | 5.80E-06 | 0.002    | 0 | 54,53 | 15 | 122 | 2  | 962  | 0.55  |
| 3243.273 | 30 | O60763       | K.DLGHVPEEED DLGHVPEEED 3       | 1.291  | 1.10E-08 | 0.002    | 0 | 83,75 | 17 | 116 | 2  | 962  | 0.51  |
| 1786.701 | 19 | O60832       | K.AGLSGAEPG AGLSGAEPGD 2        | 2.159  | 1.00E-05 | 0.002    | 0 | 54,36 | 17 | 120 | 5  | 514  | 0.85  |
| 1914.796 | 11 | O60832       | K.AGLSGAEPG AGLSGAEPGD 2        | 0.096  | 0.003    | 0.002    | 1 | 31,51 | 18 | 92  | 6  | 514  | 0.82  |
| 1914.796 | 9  | O60832       | K.AGLSGAEPG AGLSGAEPGD 3        | 1.001  | 0.003    | 0.002    | 1 | 30,33 | 18 | 120 | 5  | 514  | 1.29  |
| 1618.59  | 8  | O60841       | K.KWVDSGEDEI, KWVDS[166.99 2    | 2.159  | 4.30E-06 | 0.003    | 1 | 57,24 | 16 | 272 | 9  | 1220 | 1.96  |
| 1750.633 | 11 | O60841       | K.QSFDNDNDEE QSFDNDNDS[166 2    | 1.266  | 1.70E-04 | 0.002    | 0 | 41,21 | 16 | 272 | 9  | 1220 | 1.31  |
| 1878.728 | 13 | O60841       | K.QSFDNDNDEE QSFDNDNDS[16 2     | 1.97   | 3.60E-05 | 6.00E-04 | 1 | 49,25 | 17 | 251 | 8  | 1220 | 0.34  |
| 2113.871 | 8  | O60841       | K.NKPGPNIEG NKPGPNIES[16] 2     | 2.159  | 2.90E-07 | 0.002    | 0 | 71,48 | 19 | 272 | 9  | 1220 | 0.72  |
| 1958.694 | 18 | O60841       | K.QSFDNDNDEE QS[166.9984] 2     | -0.234 | 0.005    | 8.00E-04 | 1 | 25,21 | 15 | 272 | 9  | 1220 | 0.42  |
| 1816.625 | 8  | O60841       | K.VEMYSGSDDI VEMYS[166.99] 2    | 2.159  | 1.30E-06 | 0.002    | 0 | 60,32 | 14 | 272 | 9  | 1220 | 0.86  |
| 1878.728 | 10 | O60841       | K.QSFDNDNDEE QS[166.9984] 2     | 2.174  | 1.00E-06 | 0.001    | 1 | 65,01 | 18 | 317 | 8  | 1220 | 0.77  |
| 1549.735 | 7  | O60869       | K.LDRETEELHHI LDRETEELHHDF 4    | 0.232  | 0.021    | 0.003    | 1 | 23,89 | 20 | 26  | 2  | 148  | 1.98  |
| 825.412  | 6  | O60869       | R.VTLEVGK.V VT[181.014]LE 2     | -1.12  | 0.037    | 9.00E-04 | 0 | 20,34 | 19 | 30  | 2  | 148  | 1.15  |
| 2316.937 | 16 | O60930       | K.SASPEVSEGH SAS[166.9984] 3    | -0.084 | 0.04     | 0.004    | 0 | 19,51 | 18 | 20  | 2  | 286  | 1.59  |
| 1240.597 | 4  | O60934       | R.IPNYQLSPTK.I IPNYQLS[166.9] 2 | -1.127 | 0.045    | 0.002    | 0 | 19,26 | 18 | 19  | 3  | 754  | 1.37  |
| 1169.527 | 7  | O60934       | R.MLSQDAPTVI MLS[166.9984] 2    | -0.891 | 0.026    | 0.002    | 0 | 20,63 | 17 | 24  | 3  | 754  | 1.38  |
| 1629.745 | 7  | O75052       | K.VSHPOEPMIL VSHPOEPMILTA 3     | 0.86   | 0.005    | 0.002    | 0 | 27,95 | 17 | 28  | 1  | 506  | 0.95  |
| 1252.572 | 9  | O75069,QBULS | K.FGSDADNIAHL FGS[166.9984] 2   | 0.78   | 5.30E-04 | 0.001    | 0 | 38,35 | 18 | 38  |    |      | 1.15  |
| 1454.663 | 10 | O75122       | R.SRSDIDVNAAS SR[166.9984] 2    | 2.119  | 4.10E-06 | 0.002    | 1 | 58,96 | 18 | 69  | 5  | 1294 | 1.46  |
| 2295.94  | 11 | O75122       | K.SFDDESVDS S[166.9984]FDI 3    | 0.838  | 0.005    | 0.003    | 0 | 28,73 | 18 | 82  | 3  | 1294 | 1.3   |
| 1454.663 | 8  | O75122       | R.SRSDIDVNAAS S[166.9984]RST 3  | 0.96   | 0.004    | 4.00E-04 | 1 | 29,96 | 18 | 81  | 5  | 1294 | 0.29  |
| 1961.831 | 16 | O75131       | K.EASRSPVEFE EASRS[166.99 3     | 0.004  | 0.035    | 0.004    | 1 | 20,37 | 18 | 20  | 1  | 537  | 1.94  |
| 2513.097 | 11 | O75151       | K.AVRPEVNTVA AVRPEVNTVAS 4      | -0.102 | 0.041    | 0.002    | 1 | 20,45 | 19 | 21  | 5  | 1096 | 0.96  |
| 2041.973 | 11 | O75151       | K.EEPPSPIEATP EEPPS[166.99 2    | -1.112 | 0.038    | 0.002    | 0 | 19,42 | 18 | 21  | 5  | 1096 | 0.93  |
| 1733.824 | 14 | O75152       | K.TVLPTVPESPE TVLPTVPES[166 2   | -0.529 |          |          |   |       |    |     |    |      |       |

|          |    |        |                                     |        |          |           |   |       |    |     |    |      |       |
|----------|----|--------|-------------------------------------|--------|----------|-----------|---|-------|----|-----|----|------|-------|
| 1080.497 | 4  | 075376 | R.VSPENLVDK.S VS[166.9984]P[ 2      | -1.211 | 0.047    | 0.001     | 0 | 18.42 | 18 | 86  | 6  | 2440 | 1.14  |
| 2989.455 | 22 | 075376 | K.QQLEEEAAH QQLEEEAAK P             | 1.256  | 0.002    | 0.003     | 0 | 31.55 | 15 | 82  | 9  | 2440 | 0.88  |
| 2525.964 | 16 | 075376 | K.HEAPSSPGIC HEAPSS[166.99 3        | 0.317  | 0.018    | 0.002     | 0 | 21.04 | 16 | 85  | 10 | 2440 | 1     |
| 2493.143 | 20 | 075376 | R.YETPSDAIEVY YETPSDAIEVIS[ 3       | -0.13  | 0.046    | 0.004     | 0 | 20.05 | 19 | 81  | 10 | 2440 | 1.68  |
| 2445.998 | 17 | 075376 | K.HEAPSSPGIC HEAPSSPGICOP 3         | 0.214  | 0.021    | 0.002     | 0 | 21.48 | 17 | 53  | 6  | 2440 | 0.75  |
| 1666.78  | 8  | 075396 | R.NIGSINTELOI NIGS[166.9984 2       | 2.127  | 1.80E-07 | 0.001     | 0 | 73.85 | 19 | 74  | 2  | 215  | 0.73  |
| 1215.529 | 7  | 075400 | K.QETVADFTPK QETVADFT[181 2         | 1.287  | 1.70E-04 | 0.002     | 0 | 42.42 | 17 | 42  | 1  | 957  | 1.23  |
| 1429.548 | 12 | 075400 | K.SDSPESDAERI SDSPE[166.99 2        | -1.026 | 0.032    | -9.00E-04 | 1 | 18.32 | 16 | 30  | 2  | 957  | -0.65 |
| 1509.514 | 10 | 075400 | K.SDSPESDAERI S[166.9984]DSI 2      | -1.043 | 0.033    | 9.00E-04  | 1 | 16.11 | 14 | 25  | 3  | 957  | 0.62  |
| 1189.558 | 8  | 075400 | R.TLLEQLDDQ TLLEQLDDQ 2             | 1.426  | 1.20E-04 | 0.001     | 0 | 44.8  | 18 | 80  | 3  | 957  | 0.85  |
| 2611.979 | 23 | 075410 | R.GGAAGEDEA GGAAGEDEAG 3            | 1.291  | 1.50E-05 | 0.002     | 0 | 52.16 | 16 | 52  | 3  | 805  | 0.87  |
| 2475.129 | 17 | 075420 | R.GIQLSPGVGS GIQLS[166.998 3        | -0.127 | 0.041    | 0.003     | 0 | 19.05 | 18 | 19  | 1  | 1035 | 1.34  |
| 1974.892 | 13 | 075427 | R.GTVEEQRPPE GTVEEQRPPEL 3          | 0.313  | 0.017    | 0.002     | 0 | 23.49 | 18 | 23  | 1  | 683  | 1.08  |
| 2026.896 | 8  | 075448 | R.LLSSNEDDAN LLS[166.9984]S 2       | 2.159  | 5.50E-06 | 0.002     | 0 | 58.47 | 18 | 58  | 1  | 989  | 1.01  |
| 2026.896 | 7  | 075448 | R.LLSSNEDDAN LLS[166.9984] 2        | -0.377 | 0.008    | 0.002     | 0 | 26.78 | 18 | 60  | 2  | 989  | 1.01  |
| 2179.803 | 11 | 075475 | K.TGVTSTSDSEI T[181.014]GVT 2       | 2.159  | 1.40E-05 | 0.003     | 0 | 50.69 | 15 | 78  | 5  | 530  | 1.32  |
| 2179.803 | 7  | 075475 | K.TGVTSTSDSEI TGVTSTS[166.9 2       | -1.015 | 0.03     | 0.003     | 0 | 17.4  | 15 | 93  | 5  | 530  | 1.32  |
| 1501.605 | 9  | 075475 | K.QSNASSDDEV QSNASS[166.99 2        | 2.119  | 1.60E-06 | 0.002     | 0 | 61.99 | 17 | 53  | 5  | 530  | 1.69  |
| 1712.81  | 13 | 075475 | K.KPSEERETE! KPSS[166.9984 3        | 0.024  | 0.029    | 8.00E-04  | 1 | 21.59 | 19 | 84  | 5  | 530  | 1.04  |
| 1287.515 | 6  | 075494 | R.SRFDNYNR.F SR[166.9984]F 2        | -0.023 | 0.004    | 0.001     | 1 | 29.32 | 17 | 33  | 2  | 262  | 1.08  |
| 1044.382 | 4  | 075494 | R.SRFDNYNR.R S[166.9984]FDI 2       | -0.534 | 0.011    | 0.001     | 0 | 22.19 | 15 | 22  | 3  | 262  | 1.03  |
| 1595.674 | 15 | 075533 | R.WDQTADQTF WDTADQTFG 2             | 1.461  | 9.80E-05 | -9.00E-04 | 0 | 45.16 | 18 | 45  | 5  | 1304 | -0.6  |
| 1026.469 | 5  | 075533 | R.TMISPER.L TMIS[166.9984 2         | -0.891 | 0.025    | 9.00E-04  | 0 | 20.64 | 17 | 21  | 6  | 1304 | 0.85  |
| 2041.842 | 9  | 075533 | K.LSSWDAQET LSSWDAQET[1 3           | 0.345  | 0.015    | 0.003     | 0 | 23.8  | 18 | 70  | 8  | 1304 | 1.46  |
| 1881.873 | 8  | 075533 | K.LLVDVDESTLS LLVDVDESTLS[1 2       | 0.972  | 3.70E-04 | 0.003     | 0 | 39.25 | 17 | 86  | 9  | 1304 | 1.55  |
| 2218.913 | 7  | 075533 | R.WDETPASQW WDETPASQMG 2            | -0.587 | 0.012    | 0.002     | 0 | 23.66 | 17 | 86  | 9  | 1304 | 1.11  |
| 2041.842 | 10 | 075533 | K.LSSWDAQET LSSWDAQET[1 3           | 0.202  | 0.021    | 0.003     | 0 | 22.36 | 18 | 86  | 9  | 1304 | 1.46  |
| 2335.06  | 22 | 075564 | R.EAEGGRPPAV EAEGGRPPAAT 3          | -0.122 | 0.046    | 0.004     | 0 | 19.13 | 18 | 19  | 2  | 520  | 1.52  |
| 1120.456 | 7  | 075569 | R.EDSGTSLGK EDS[166.9984] 2         | -1.177 | 0.048    | 0.001     | 0 | 18.78 | 18 | 20  | 3  | 313  | 1.24  |
| 1983.906 | 15 | 075599 | R.AEAPLERED AEAPLEREDS[ 2           | -0.988 | 0.03     | 0.003     | 1 | 21.67 | 19 | 22  | 2  | 313  | 1.56  |
| 1677.737 | 11 | 075592 | R.SKSDSYLDLP SKS[166.9984]C 2       | 0.8    | 5.20E-04 | 0.002     | 1 | 38.55 | 18 | 115 | 6  | 4640 | 1.36  |
| 1513.689 | 11 | 075592 | R.VNSGDTEVGF VNS[166.9984] 2        | 2.159  | 1.30E-09 | 0.003     | 0 | 94.16 | 18 | 115 | 6  | 4640 | 1.73  |
| 1846.668 | 9  | 075643 | R.EEASDDOME EAS[166.9984 3          | 0.512  | 0.01     | 0.002     | 0 | 23.46 | 16 | 78  | 4  | 2136 | 1.33  |
| 1301.601 | 7  | 075643 | R.NSAFESLYQD NSAFESLYQDK 2          | -0.53  | 0.01     | 0.002     | 0 | 25.24 | 18 | 78  | 3  | 2136 | 1.62  |
| 2593.167 | 26 | 075674 | K.EATNTTSEPS EAATNTTSEPSAF 3        | 0.541  | 0.009    | 0.004     | 0 | 27.73 | 20 | 28  | 1  | 476  | 1.7   |
| 1841.847 | 8  | 075676 | R.LEPVYSPGSGF LEPVYSPGSG[1 2        | -0.651 | 0.015    | 0.003     | 0 | 24.04 | 18 | 24  | 2  | 772  | 1.6   |
| 1921.813 | 13 | 075676 | R.LEPVYSPGSGF LEPVYSPGSG[1 2        | 0.973  | 3.30E-04 | 0.001     | 0 | 40.27 | 18 | 40  | 1  | 772  | 0.69  |
| 2138.887 | 23 | 075691 | K.SLSDNGQPGT SLSDNGQPGT[1 2         | 0.951  | 3.20E-04 | 0.001     | 0 | 40.04 | 18 | 40  | 3  | 2785 | 0.57  |
| 1061.503 | 5  | 075694 | K.AAPOSQSPVK AAPQSPS[166. 2         | -0.678 | 0.015    | 8.00E-04  | 0 | 24.77 | 19 | 25  | 1  | 1391 | 0.77  |
| 2164.929 | 11 | 075815 | R.QNSPVTQDG QNS[166.9984] 2         | 2.159  | 7.00E-07 | 0.002     | 0 | 66.89 | 18 | 74  | 2  | 825  | 1.06  |
| 1363.662 | 8  | 075815 | R.TGSEPALSPA TGSSEPAL[166. 2        | -0.552 | 0.011    | 0.002     | 0 | 26.03 | 19 | 74  | 2  | 825  | 1.39  |
| 1322.624 | 6  | 075822 | K.VLTPEQLAD VLT[181.014]P[ 2        | -0.68  | 0.016    | 0.002     | 0 | 22.73 | 17 | 23  | 1  | 258  | 1.5   |
| 2088.909 | 17 | 075907 | R.TGSRPSSHGG T[181.014]GSR 3        | 0.623  | 0.007    | 7.00E-04  | 0 | 27.57 | 19 | 28  | 1  | 488  | 0.32  |
| 1919.9   | 9  | 076021 | K.KATNESEDEIP KATNESEDEIP[166.998 2 | 1.824  | 4.50E-05 | 0.004     | 0 | 48.79 | 18 | 50  | 3  | 490  | 2.22  |
| 1919.9   | 11 | 076021 | K.KATNESEDEIP KAT[181.014]NE 3      | 0.888  | 0.004    | 0.004     | 0 | 29.2  | 18 | 48  | 3  | 490  | 2.01  |
| 1823.72  | 17 | 076074 | R.GHTESCSCPL GHTESC[160.0 2         | -0.683 | 0.014    | 0.004     | 0 | 22.71 | 17 | 23  | 2  | 875  | 2.38  |
| 2234.905 | 16 | 076080 | R.MSPMGTASC MSP[166.9984]P 3        | 0.501  | 0.009    | 0.006     | 0 | 25.35 | 18 | 25  | 1  | 213  | 2.8   |
| 1992.877 | 7  | 094761 | R.GRRPQDDVJ GRRPS[166.998 3         | 1.239  | 0.002    | 5.00E-04  | 1 | 32.71 | 18 | 33  | 1  | 1208 | 0.27  |
| 1779.755 | 14 | 094761 | R.RRPSQDDVEAJ RPS[166.9984]C 2      | -0.883 | 0.022    | 0.001     | 0 | 22.71 | 19 | 39  | 2  | 1208 | 0.63  |
| 1705.722 | 12 | 094762 | R.GEVPGGSAH GEVPGGSAHYC 2           | -0.013 | 0.003    | 7.00E-04  | 0 | 30.42 | 18 | 54  | 3  | 991  | 1.04  |
| 2538.024 | 20 | 094762 | K.YTGEEDGAGY YTGEEDGAGG[ 3          | 1.291  | 2.70E-04 | 0.003     | 0 | 42.19 | 19 | 54  | 3  | 991  | 1.47  |
| 3080.223 | 24 | 094763 | R.SISCEATCS S[166.9984]C 3          | 1.224  | 0.002    | 0.003     | 0 | 34.3  | 19 | 50  | 5  | 535  | 1.06  |
| 1862.876 | 13 | 094763 | R.KNKTSGSHGA KNS[166.9984] 3        | 0.492  | 0.01     | 5.00E-04  | 1 | 25.24 | 18 | 35  | 5  | 535  | 0.23  |
| 1734.781 | 13 | 094763 | K.NKTSGSHGSA KNS[166.9984]T 3       | 0.412  | 0.014    | 0.002     | 0 | 23.44 | 17 | 35  | 5  | 535  | 1.07  |
| 3080.223 | 8  | 094763 | R.SISCEATCS S[160.0307] 3           | 0.307  | 0.015    | 0.003     | 0 | 24.42 | 19 | 44  | 6  | 535  | 1.03  |
| 2223     | 8  | 094782 | R.ASEIDQVPA ASEIDQVPA 2             | 0.571  | 7.60E-04 | 0.003     | 0 | 37.25 | 19 | 37  | 2  | 785  | 1.23  |
| 1410.604 | 12 | 094782 | K.VESSEIPEPI VESSEI[166.9 2         | 1.37   | 1.20E-04 | 0.001     | 0 | 45.24 | 19 | 45  | 2  | 785  | 0.95  |
| 1592.706 | 12 | 094804 | K.QVAEQGDL QVAEQGDL[ 2              | 2.159  | 6.00E-08 | 9.00E-04  | 0 | 76.91 | 17 | 112 | 3  | 968  | 0.55  |
| 1725.704 | 9  | 094804 | K.ISEEAECNPI ISEEAEC[160.0 2        | 2.159  | 1.80E-05 | 0.001     | 0 | 53    | 18 | 112 | 3  | 968  | 0.76  |
| 2450.055 | 18 | 094826 | R.ASPAPGSGH AS[166.9984]P 3         | 0.61   | 0.007    | 0.003     | 0 | 27.46 | 19 | 27  | 1  | 608  | 1.25  |
| 2491.054 | 12 | 094842 | R.LSTTSPSTSS LSTTSP[166.998 3       | -0.1   | 0.039    | 0.002     | 1 | 19.35 | 18 | 19  | 2  | 621  | 0.72  |
| 1255.572 | 9  | 094876 | K.FGSAADNIPU FGSAADNIP[166.9984] 2  | 2.159  | 4.00E-06 | 0.002     | 0 | 59.97 | 19 | 60  | 1  | 653  | 1.42  |
| 1692.736 | 14 | 094887 | K.DSSSLLTDPQ DSSS[166.998 2         | -0.075 | 0.003    | 0.002     | 0 | 30.8  | 19 | 31  | 1  | 1054 | 1.06  |
| 1692.736 | 7  | 094887 | K.DSSSLLTDPQ DSSS[166.9984 2        | -1.092 | 0.035    | 0.002     | 0 | 20.63 | 19 | 21  | 1  | 1054 | 1.06  |
| 1201.492 | 7  | 094915 | R.SNTLDMIDGF SNT[166.9984]NTI 2     | 0.042  | 0.003    | 0.002     | 0 | 29.97 | 17 | 30  | 2  | 3013 | 1.36  |
| 1201.492 | 7  | 094915 | R.SNTLDMIDGF SNT[181.014]L 2        | -0.638 | 0.013    | 0.002     | 0 | 23.2  | 17 | 44  | 2  | 3013 | 1.45  |
| 1090.439 | 6  | 094929 | R.QGMSPTFSR QGMS[166.998 2          | -0.439 | 0.009    | 0.001     | 0 | 24.16 | 16 | 24  | 2  | 683  | 1.18  |
| 1580.663 | 8  | 094929 | R.ASSPGYIDSP ASS[166.9984] 2        | -0.571 | 0.011    | 0.001     | 0 | 24.84 | 18 | 35  | 2  | 683  | 0.74  |
| 1580.663 | 10 | 094929 | R.ASSPGYIDSP ASS[166.9984]S 2       | 0.413  | 0.001    | 0.001     | 0 | 34.71 | 18 | 44  | 2  | 683  | 0.74  |
| 2862.231 | 19 | 094979 | K.DSDQVAQSDI DSDQVAQ[16 3           | 1.224  | 8.90E-05 | 0.001     | 0 | 46.35 | 18 | 56  | 2  | 1220 | 0.47  |
| 2862.231 | 17 | 094979 | K.DSDQVAQSDI DSDQVAQSDG 3           | 0.696  | 0.006    | 0.004     | 0 | 28.3  | 19 | 56  | 2  | 1220 | 1.48  |
| 2139.921 | 16 | 094986 | R.NVSPFVPCV NVS[166.9984] 3         | 2.119  | 0.023    | 0.002     | 0 | 21.53 | 18 | 22  | 2  | 1654 | 0.96  |
| 1596.654 | 7  | 095049 | R.SSEPVQADES SSEPVQADESQ 2          | 0.953  | 3.90E-04 | 0.002     | 0 | 38.08 | 16 | 83  | 4  | 933  | 1.31  |
| 1666.696 | 14 | 095049 | R.SPEASQTDSP S[166.9984]PE/ 2       | 0.711  | 6.50E-04 | 0.002     | 0 | 35.66 | 16 | 36  | 2  | 933  | 1.15  |
| 1154.473 | 5  | 095049 | R.TISEPDEQR.S TIS[166.9984]E 2      | -0.887 | 0.022    | 0.002     | 0 | 19.68 | 16 | 79  | 4  | 933  | 1.3   |
| 1324.549 | 15 | 095067 | K.GPSPTEPDSI GPS[166.9984] 2        | 0.062  | 0.003    | 0.002     | 0 | 28.17 | 15 | 28  | 1  | 398  | 1.24  |
| 1389.547 | 7  | 095071 | R.WLDGASFDN WLDGAS[166.9 2          | 0.1    | 0.002    | 0.002     | 0 | 30.55 | 17 | 31  | 4  | 2799 | 1.32  |
| 1962.731 | 14 | 095149 | R.LAEDDWTGN LAEDDWTGME 2            | 1.206  | 2.10E-04 | 0.002     | 0 | 39.61 | 15 | 65  | 3  | 360  | 0.76  |
| 1535.575 | 8  | 095155 | R.SQSMIDIGV S[166.9984] 2           | 2.159  | 7.50E-06 | 0.002     | 0 | 54.27 | 16 | 54  | 2  | 1302 | 1.14  |
| 2916.214 | 17 | 095155 | R.SQSSSEGVSS S[166.9984]OS 3        | 0.213  | 0.022    | 0.002     | 0 | 21.48 | 17 | 66  | 3  | 1302 | 0.82  |
| 1719.759 | 9  | 095171 | K.SSEGLDEHI SSEGLDEHINV 2           | 1.776  | 5.60E-05 | 0.002     | 0 | 49.31 | 19 | 172 | 6  | 688  | 1.21  |
| 1067.513 | 11 | 095171 | R.GOSLDLNUK V GOS[166.9984] 2       | 0.438  | 0.001    | 0.001     | 0 | 36.93 | 20 | 172 | 6  | 688  | 1.09  |
| 1401.697 | 8  | 095171 | R.NNQSQDLN NNQSQDLNLI 2             | 2.159  | 2.00E-05 | 0.002     | 0 | 53.48 | 19 | 172 | 6  | 688  | 1.13  |
| 1667.727 | 15 | 095171 | R.RSEDLNATE RS[166.9984]E 2         | 1.6    | 7.50E-05 | 0.001     | 1 | 46.55 | 18 | 116 | 6  | 688  | 0.84  |
| 1079.55  | 7  | 095171 | K.GIQSGSPIK GIQSGS[166.9 2          | 1.081  | 2.50E-04 | 9.00E-04  | 0 | 42.36 | 19 | 116 | 6  | 688  | 0.8   |
| 1151.425 | 8  | 095171 | R.YSSDOLDR.Y YSS[166.9984]C 2       | 0.916  | 4.10E-04 | 0.001     | 0 | 36.69 | 15 | 154 | 5  | 688  | 1.19  |
| 793.408  | 3  | 095180 | R.ATPLRR.A AT[181.014]PLI 2         | -1.181 |          |           |   |       |    |     |    |      |       |

|          |    |        |                                       |        |          |           |   |       |    |     |    |      |       |
|----------|----|--------|---------------------------------------|--------|----------|-----------|---|-------|----|-----|----|------|-------|
| 3429.311 | 15 | O95251 | K.RNAGSSSDGT RNAGS[166.99] 3          | 0.374  | 0.014    | 0.004     | 1 | 22.09 | 16 | 66  | 2  | 611  | 1.24  |
| 1360.588 | 8  | O95292 | K.SLSSLLDDTEV SL[166.9984]S 2         | 0.876  | 4.20E-04 | 0.002     | 0 | 39.31 | 18 | 39  | 2  | 243  | 1.23  |
| 1360.588 | 7  | O95292 | K.SLSSLLDDTEV S[166.9984]SS 2         | -0.005 | 0.003    | 0.001     | 0 | 29.48 | 17 | 55  | 2  | 243  | 0.71  |
| 1360.588 | 6  | O95292 | K.SLSSLLDDTEV SLS[166.9984] 2         | 1.138  | 2.30E-04 | 0.002     | 0 | 41.91 | 18 | 42  | 1  | 243  | 1.23  |
| 1710.693 | 9  | O95297 | R.DYTGCTSESI DYTCG[160.03] 2          | 1.028  | 3.20E-04 | 0.001     | 0 | 39.83 | 17 | 40  | 2  | 269  | 0.69  |
| 1218.54  | 7  | O95297 | K.SESVYVADR. SESVYV[243.02] 2         | 0.481  | 9.60E-04 | 0.002     | 0 | 36.34 | 19 | 73  | 4  | 269  | 1.41  |
| 1710.693 | 9  | O95297 | R.DYTGCTSESI DYTCG[160.03] 2          | -0.885 | 0.026    | 0.002     | 0 | 20.68 | 17 | 21  | 2  | 269  | 1.21  |
| 1710.693 | 7  | O95297 | R.DYTGCTSESI DYTCG[160.03] 2          | -0.032 | 0.004    | 0.002     | 0 | 29.22 | 17 | 57  | 4  | 269  | 1.21  |
| 2710.126 | 23 | O95359 | R.MSESPTPCSG MSES[166.998] 3          | -0.136 | 0.048    | 0.003     | 0 | 18.96 | 18 | 32  | 2  | 2948 | 0.98  |
| 2460.121 | 19 | O95359 | K.LDNTPASPPR LDNTPAS[166.99] 3        | 1.097  | 0.003    | 0.002     | 1 | 30.29 | 17 | 32  | 2  | 2948 | 1.01  |
| 2710.126 | 14 | O95359 | R.MSESPTPCSG MS[166.9984]E 3          | 0.148  | 0.025    | 0.003     | 0 | 21.83 | 18 | 25  | 3  | 2948 | 0.98  |
| 2158.793 | 25 | O95361 | R.ETEEQSDSDA ETEEQSDS[166.99] 2       | 2.159  | 1.10E-05 | 0.001     | 0 | 53.2  | 16 | 139 | 6  | 564  | 0.57  |
| 2158.793 | 22 | O95361 | R.ETEEQSDSDA ETEEQSDS[166.99] 2       | 0.163  | 0.022    | 7.00E-04  | 0 | 19.95 | 16 | 139 | 6  | 564  | 0.33  |
| 3546.528 | 24 | O95361 | R.ATAQPPAPLS ATAQPPAPLS[166.99] 3     | 1.291  | 4.80E-04 | 0.004     | 0 | 38.9  | 18 | 139 | 6  | 564  | 1.07  |
| 3546.528 | 21 | O95361 | R.ATAQPPAPLS ATAQPPAPLS[166.99] 3     | 1.291  | 8.80E-04 | 0.004     | 0 | 36.29 | 18 | 139 | 6  | 564  | 1.07  |
| 3546.528 | 6  | O95361 | R.ATAQPPAPLS ATAQPPAPLS[166.99] 3     | 0.334  | 0.016    | 0.004     | 0 | 23.7  | 18 | 118 | 4  | 564  | 1.07  |
| 2158.793 | 7  | O95361 | R.ETEEQSDSDA ET[181.014]E[166.99] 2   | 2.024  | 2.00E-05 | 0.002     | 0 | 50.37 | 16 | 110 | 4  | 564  | 0.89  |
| 3546.528 | 19 | O95361 | R.ATAQPPAPLS ATAQPPAPLS[166.99] 3     | 1.174  | 0.002    | 0.004     | 0 | 32.1  | 18 | 78  | 3  | 564  | 1.07  |
| 3546.528 | 13 | O95361 | R.ATAQPPAPLS ATAQPPAPLS[166.99] 3     | 0.787  | 0.006    | 0.004     | 0 | 28.2  | 18 | 154 | 6  | 564  | 1.07  |
| 2410.067 | 9  | O95365 | R.GGAPDPSPG GGAPDPSPG[166.99] 2       | 0.522  | 9.90E-04 | 2.00E-04  | 0 | 35.77 | 18 | 31  | 1  | 584  | 0.09  |
| 2016.683 | 17 | O95400 | K.HSLDSEEDD HSLDS[166.998] 3          | 0.989  | 0.004    | 0.003     | 0 | 25.21 | 13 | 188 | 5  | 341  | 1.65  |
| 1504.631 | 13 | O95425 | K.FSSSIENSDDP FSSSIENS[166.9984] 2    | 1.189  | 2.10E-04 | 0.003     | 0 | 42.44 | 18 | 72  | 9  | 2214 | 2.04  |
| 1143.472 | 6  | O95425 | K.SFDEQNVPK I S[166.9984]FDI 2        | -0.964 | 0.029    | 7.00E-04  | 0 | 20.91 | 18 | 72  | 9  | 2214 | 0.63  |
| 1925.832 | 10 | O95425 | K.YGSFEEAEAS YGS[166.9984] 2          | 0.443  | 0.001    | 0.003     | 0 | 34.98 | 18 | 72  | 9  | 2214 | 1.38  |
| 1429.636 | 8  | O95425 | R.DSSFTVEPRSF DSSFTVEPR[166.99] 2     | -0.655 | 0.014    | 0.002     | 1 | 24    | 18 | 72  | 9  | 2214 | 1.55  |
| 1814.679 | 5  | O95425 | R.CTSHSETPTVI C[160.0307]TSI 2        | -0.149 | 0.004    | 0.002     | 0 | 27.06 | 16 | 70  | 5  | 2214 | 0.97  |
| 1814.679 | 5  | O95425 | R.CTSHSETPTVI C[160.0307]TSI 2        | -0.689 | 0.017    | 0.003     | 0 | 21.66 | 16 | 63  | 7  | 2214 | 1.86  |
| 1088.533 | 5  | O95433 | K.LDGEASINNR LDGEASINNR 2             | -0.656 | 0.016    | -2.00E-04 | 0 | 22.99 | 17 | 23  | 1  | 338  | -0.23 |
| 1302.573 | 9  | O95453 | R.NNSFTAPSTV NNS[166.9984] 2          | -0.039 | 0.003    | 0.001     | 0 | 31.16 | 19 | 31  | 2  | 639  | 1.02  |
| 1068.497 | 5  | O95453 | K.ELSPAGSISK I EL[166.9984]F 2        | -0.839 | 0.021    | 0.001     | 0 | 23.16 | 19 | 42  | 2  | 639  | 1.26  |
| 1715.639 | 6  | O95456 | R.AGTEDEEEEE AGT[181.014]E 2          | -0.819 | 0.022    | 0.004     | 1 | 20.36 | 16 | 20  | 2  | 288  | 2.07  |
| 2810.179 | 15 | O95671 | K.HDSIPAADTFI HDSIPAADTF[166.99] 3    | 0.425  | 0.011    | 0.004     | 0 | 24.57 | 18 | 25  | 2  | 621  | 1.5   |
| 2810.179 | 8  | O95671 | K.HDSIPAADTFI HDS[166.9984] 3         | -0.011 | 0.031    | 0.004     | 0 | 20.24 | 18 | 20  | 1  | 621  | 1.5   |
| 2810.179 | 18 | O95671 | K.HDSIPAADTFI HDSIPAADTFEC 3          | 1.2    | 2.10E-04 | 0.004     | 0 | 41.96 | 18 | 42  | 2  | 621  | 1.5   |
| 2128.943 | 12 | O95674 | R.VAHEPVAPPE VAHEPVAPPED 2            | 0.407  | 0.001    | 0.002     | 1 | 35.62 | 19 | 46  | 2  | 445  | 0.76  |
| 2128.943 | 9  | O95674 | R.VAHEPVAPPE VAHEPVAPPED 2            | 0.074  | 0.002    | 0.002     | 1 | 32.32 | 19 | 41  | 2  | 445  | 0.76  |
| 2536.1   | 14 | O95684 | K.GPTTGGEGAL GPTTGGEGALD[166.99] 3    | 0.985  | 0.004    | 0.002     | 1 | 30.17 | 18 | 30  | 1  | 399  | 0.9   |
| 1624.75  | 7  | O95785 | K.SPQLSPPRPA SPQLS[166.99] 2          | -1.055 | 0.038    | 0.002     | 0 | 19.99 | 18 | 20  | 3  | 1651 | 1.34  |
| 1865.759 | 8  | O95793 | K.VTFFEPGSGD VTFFEPG[166.99] 2        | -0.013 | 0.003    | 0.003     | 0 | 31.42 | 19 | 31  | 2  | 577  | 1.64  |
| 2279.908 | 16 | O95817 | R.SQSPAAASDCS SQSPAAASDCS[166.9984] 3 | -0.128 | 0.042    | 0         | 0 | 18.04 | 17 | 18  | 3  | 575  | 0.01  |
| 2279.908 | 18 | O95817 | R.SQSPAAASDCS SQS[166.9984] 3         | -0.104 | 0.039    | 0         | 0 | 18.32 | 17 | 83  | 2  | 575  | 0.01  |
| 1993.884 | 19 | O95819 | R.RDSPPLQGGC RDS[166.9984] 3          | 1.224  | 4.70E-04 | 0.003     | 1 | 37.97 | 17 | 38  | 2  | 1239 | 1.58  |
| 1993.884 | 16 | O95819 | R.RDSPPLQGGC RDSPLQGS[166.99] 3       | 1.127  | 9.60E-04 | 0.003     | 1 | 34.86 | 17 | 35  | 3  | 1239 | 1.58  |
| 1686.758 | 7  | O95819 | R.AASSLNSNG AASSLNS[166.99] 2         | -0.929 | 0.027    | 7.00E-04  | 0 | 21.24 | 18 | 42  | 4  | 1239 | 0.44  |
| 1299.548 | 7  | O95835 | R.SNSFNPLGN SNS[166.9984] 2           | 1.001  | 3.20E-04 | 6.00E-04  | 0 | 40.56 | 18 | 41  | 1  | 1130 | 0.44  |
| 1195.608 | 5  | O95835 | K.QITTSPTIVR K QITTS[166.998] 2       | 0.016  | 0.003    | 0.001     | 0 | 32.69 | 20 | 78  | 2  | 1130 | 1.15  |
| 875.45   | 6  | O95972 | R.LLGHSLR Y LLGH[166.998] 2           | 0.087  | 0.002    | 5.00E-04  | 0 | 30.42 | 17 | 30  | 1  | 392  | 0.62  |
| 1991.762 | 14 | O95999 | K.CSSCEPFDG C[160.0307]SSX 2          | -0.036 | 0.003    | 0.003     | 0 | 28.19 | 16 | 40  | 2  | 233  | 1.65  |
| 1323.474 | 7  | O95999 | R.SNSDESNFSEI SNS[166.9984] 2         | 0.948  | 3.20E-04 | 0.002     | 0 | 35.01 | 13 | 35  | 1  | 233  | 1.73  |
| 1490.635 | 9  | O96018 | R.SPSGPPAMD I SPS[166.9984]C 2        | -0.178 | 0.005    | 0.002     | 0 | 27.77 | 17 | 28  | 1  | 575  | 1.34  |
| 1490.635 | 11 | O96018 | R.SPSGPPAMD I SPS[166.9984]P 2        | 0.72   | 6.70E-04 | 0.002     | 0 | 36.74 | 17 | 37  | 1  | 575  | 1.34  |
| 1395.594 | 9  | O96019 | R.DDGSSTLMEID DDGSSTLMEIDG 2          | 2.057  | 3.00E-05 | 0.002     | 0 | 52.12 | 19 | 52  | 2  | 429  | 1.13  |
| 1766.712 | 10 | O96028 | R.IQDPTDEAEA IQDPTDEAEAET 2           | 2.172  | 5.10E-07 | 0.001     | 0 | 66.61 | 16 | 67  | 3  | 1365 | 0.78  |
| 1118.584 | 13 | P00338 | K.SADTLWGQK SADTLWGQK 2               | -1.22  | 0.047    | 0.002     | 0 | 18.36 | 18 | 18  | 1  | 332  | 1.66  |
| 2194.018 | 16 | P00519 | K.GQGESDPLDH GQGESDPLDHE 3            | -0.125 | 0.049    | 0.003     | 0 | 19.1  | 18 | 19  | 2  | 1130 | 1.42  |
| 2114.053 | 17 | P00533 | R.ELVEPLPSGE ELVEPLT[181.0] 3         | -0.04  | 0.04     | 0.005     | 0 | 17.95 | 16 | 18  | 1  | 1210 | 2.23  |
| 1402.688 | 8  | P01116 | K.DSEDPVMVL DSEDPVMVLVG 2             | 0.786  | 5.60E-04 | 0.002     | 0 | 36.39 | 16 | 36  | 1  | 189  | 1.53  |
| 961.439  | 6  | P02538 | R.SLYGLGSK R S[166.9984]LYC 2         | -1.148 | 0.039    | 8.00E-04  | 0 | 21.08 | 20 | 71  | 1  | 664  | 0.81  |
| 1646.717 | 12 | P02545 | R.SVGGSGGGS SVGGSGGGS[1] 2            | 2.159  | 7.50E-08 | 0.000     | 0 | 75.71 | 17 | 445 | 21 | 664  | -0.21 |
| 1291.628 | 7  | P02545 | R.QNGDDPLTY QNGDDPLTYR 2              | 0.801  | 4.50E-04 | 0.002     | 0 | 38.56 | 18 | 445 | 21 | 664  | 1.24  |
| 1439.653 | 6  | P02545 | R.SGAQASSTPL SGAQASSTPLS[166.99] 2    | 0.507  | 0.001    | 0.002     | 0 | 35.62 | 18 | 473 | 23 | 664  | 1.46  |
| 1002.547 | 7  | P02545 | K.DLEALLNSK E DLEALLNSK 2             | 2.059  | 2.50E-05 | 0.002     | 0 | 54.14 | 21 | 473 | 23 | 664  | 2.03  |
| 1131.528 | 6  | P02545 | K.EDLQELNDR I EDLQELNDR 2             | 1.158  | 2.30E-04 | 3.00E-04  | 0 | 42.13 | 18 | 445 | 21 | 664  | 0.24  |
| 1439.653 | 17 | P02545 | R.SGAQASSTPL SGAQASST[181] 2          | -0.425 | 0.008    | 1.00E-04  | 0 | 26.3  | 18 | 473 | 23 | 664  | 0.07  |
| 1646.717 | 9  | P02545 | R.SVGGSGGGS S[166.9984]VG 2           | 2.172  | 7.20E-06 | 0.002     | 0 | 56.69 | 18 | 444 | 24 | 664  | 1.37  |
| 1571.714 | 8  | P02545 | R.TALINSTGEEI TALINS[166.99] 2        | -0.268 | 0.006    | 0.003     | 0 | 28.87 | 19 | 445 | 21 | 664  | 2.06  |
| 1173.53  | 7  | P02545 | R.SYLLGNSSPR SYLLGNSS[166.99] 2       | 1.421  | 1.10E-04 | 0.001     | 0 | 46.76 | 20 | 445 | 21 | 664  | 1.07  |
| 1439.653 | 9  | P02545 | R.SGAQASSTPL S[166.9984]GA 2          | 2.159  | 4.10E-07 | 0.002     | 0 | 69.6  | 18 | 445 | 21 | 664  | 1.39  |
| 1374.628 | 6  | P02545 | R.AQHEDQVEQ AQHEDQVEQY 3              | 0.474  | 0.011    | 0.002     | 0 | 26.06 | 19 | 445 | 21 | 664  | 1.45  |
| 1616.641 | 10 | P02545 | K.SNEDQSMGN SNEQDS[166.99] 2          | 2.025  | 2.90E-05 | 0.002     | 0 | 49.8  | 17 | 445 | 21 | 664  | 1.4   |
| 1616.641 | 6  | P02545 | K.SNEDQSMGN S[166.9984]NEI 2          | 2.072  | 2.60E-05 | 0.003     | 0 | 50.27 | 17 | 445 | 21 | 664  | 1.71  |
| 1401.629 | 7  | P02545 | R.LRSPSPSOR LRLS[166.9984] 2          | 0.329  | 0.001    | 0.003     | 1 | 33.84 | 18 | 445 | 21 | 664  | 2.22  |
| 1173.53  | 6  | P02545 | R.SYLLGNSSPR SYLLGNSS[166.99] 2       | 0.39   | 0.001    | 0.001     | 0 | 36.45 | 20 | 381 | 19 | 664  | 1.07  |
| 1103.477 | 6  | P02545 | K.NIYSELR E NIYS[166.9984] 2          | -0.867 | 0.023    | 0.001     | 0 | 23.88 | 20 | 381 | 19 | 664  | 1.15  |
| 1203.574 | 9  | P02545 | R.VAVEEVDEEC VAVEEVDEEGK 2            | 1.944  | 8.30E-07 | 0.001     | 0 | 65.53 | 17 | 458 | 23 | 664  | 0.89  |
| 1401.629 | 6  | P02545 | R.LRSPSPSOR LRLS[166.9984] 2          | -0.326 | 0.007    | 0.003     | 1 | 27.28 | 18 | 414 | 24 | 664  | 2.22  |
| 1052.477 | 6  | P02545 | R.LRSPSPSOR S LSPS[166.9984] 2        | -1.034 | 0.035    | 0.002     | 0 | 20.19 | 18 | 444 | 24 | 664  | 1.52  |
| 1321.662 | 8  | P02545 | R.LRSPSPSOR LRLS[166.9984] 2          | -0.894 | 0.023    | 0.002     | 1 | 21.61 | 18 | 458 | 23 | 664  | 1.31  |
| 1028.573 | 7  | P02545 | R.LADALQELR LADALQELR 2               | 2.084  | 6.90E-06 | 0.001     | 0 | 58.14 | 19 | 427 | 24 | 664  | 1.21  |
| 910.464  | 10 | P02545 | R.LQLELSK V LQLELS[166.99] 2          | -1.015 | 0.035    | 7.00E-04  | 0 | 22.28 | 20 | 449 | 20 | 664  | 0.78  |
| 1321.662 | 4  | P02545 | R.LRSPSPSOR LRLS[166.9984] 2          | -1.008 | 0.03     | 0.002     | 1 | 20.48 | 18 | 427 | 24 | 664  | 1.31  |
| 1089.553 | 7  | P02545 | R.SLETENAGLR SLETENAGLR 2             | -0.737 | 0.016    | 6.00E-04  | 0 | 24.18 | 19 | 473 | 23 | 664  | 0.51  |
| 1052.477 | 7  | P02545 | R.LRSPSPSOR S LSPS[166.99] 2          | -0.666 | 0.015    | 0.002     | 0 | 23.88 | 18 | 414 | 24 | 664  | 1.52  |
| 1752.862 | 7  | P02545 | R.NSNLVGAAHI NSNLVGAHEE 3             | 0.246  | 0.019    | 0.001     | 0 | 21.81 | 17 | 346 | 19 | 664  | 0.68  |
| 1165.548 | 7  | P02545 | K.AAYEAELGD AAYEAELGDAR 2             | 0.285  | 0.002    | 0.001     | 0 | 34.41 | 19 | 427 | 24 | 664  | 0.9   |
| 1148.579 | 8  | P02545 | R.ITESEVVSRI ITESEVVSRI 2             | 1.469  | 1.10E-04 | 7.00E-04  | 0 | 44.24 | 17 | 458 | 23 | 664  | 0.57  |
| 3312.33  | 23 | P0268  |                                       |        |          |           |   |       |    |     |    |      |       |

|          |    |               |                             |   |        |          |           |   |       |    |     |    |      |       |
|----------|----|---------------|-----------------------------|---|--------|----------|-----------|---|-------|----|-----|----|------|-------|
| 1264.617 | 8  | P05198        | K.DEQLESFQR.DEQLESFQR       | 2 | 1.81   | 4.90E-05 | 0.002     | 0 | 48.65 | 18 | 49  | 1  | 315  | 1.43  |
| 1866.718 | 12 | P05198        | R.ENAEVDDG.DENAEVDDGDV      | 2 | 1.688  | 6.70E-05 | 1.00E-04  | 0 | 45.43 | 16 | 79  | 2  | 315  | 1.03  |
| 1256.684 | 8  | P05387        | K.NIEDVIAQIC.NIEDVIAQIGIK   | 2 | 0.137  | 0.002    | 0.002     | 0 | 31.25 | 17 | 31  | 1  | 115  | 1.69  |
| 1551.767 | 12 | P05412        | K.NSDLLTSPDV.NSDLLT[181.01  | 2 | 2.159  | 1.10E-06 | 0.004     | 0 | 64.98 | 18 | 65  | 2  | 331  | 2.53  |
| 1551.767 | 14 | P05412        | K.NSDLLTSPDV.NSDLLT[166.9   | 2 | 2.024  | 1.60E-06 | 0.004     | 0 | 63.37 | 18 | 63  | 1  | 331  | 2.53  |
| 1316.669 | 16 | P05455        | K.HEDQEQSLNK.HEDQEQSLNK     | 2 | 0.872  | 4.30E-04 | 0.001     | 0 | 39.25 | 18 | 117 | 3  | 408  | 1.06  |
| 1114.56  | 10 | P05455        | K.DANNGLQL.DANNGLQLQR       | 2 | 0.696  | 5.80E-04 | 0.001     | 0 | 35.51 | 16 | 99  | 4  | 408  | 0.96  |
| 2249.862 | 11 | P05455        | K.FASDDHDF.FAS[166.9984]    | 2 | 2.127  | 7.90E-08 | 1.00E-04  | 0 | 74.24 | 16 | 98  | 2  | 408  | 0.05  |
| 1267.639 | 4  | P05783        | R.OSVENDHGL.OSVENDHGLR      | 3 | -0.153 | 0.043    | 8.00E-04  | 0 | 18.8  | 18 | 26  | 3  | 430  | 0.61  |
| 1046.548 | 7  | P05783        | K.VIDDTNTR.L.VIDDTNTR       | 2 | -1.068 | 0.033    | 8.00E-04  | 0 | 20.87 | 19 | 47  | 3  | 430  | 0.8   |
| 1319.67  | 7  | P05783        | R.AQIFANTVDA.AQIFANTVDNA    | 2 | 0.547  | 8.30E-04 | 0.002     | 0 | 36.02 | 18 | 67  | 4  | 430  | 1.57  |
| 1093.494 | 8  | P05783,Q9276  | K.ETMQSLNDR.ETMQSLNDR       | 2 | -0.458 | 0.009    | -2.00E-04 | 0 | 26.97 | 19 | 27  |    |      | -0.21 |
| 1137.579 | 15 | P05787        | K.YEELQSLAG.YEELQSLAGK      | 2 | 2.119  | 4.20E-06 | 0.001     | 0 | 60.61 | 19 | 224 | 16 | 483  | 1.06  |
| 1344.675 | 12 | P05787        | R.ASLEAAIADA.ASLEAAIADAEC   | 2 | 1.102  | 2.40E-04 | 0.002     | 0 | 42.57 | 19 | 230 | 15 | 483  | 1.46  |
| 950.398  | 7  | P05787        | R.ISSSFSR.V.ISSS[166.9984]  | 2 | 0.383  | 0.001    | 0.001     | 0 | 36.36 | 20 | 216 | 14 | 483  | 1.28  |
| 1000.567 | 5  | P05787        | R.LQAEIEGLK.G.LQAEIEGLK     | 2 | 0.276  | 0.002    | 6.00E-04  | 0 | 32.31 | 17 | 230 | 15 | 483  | 0.6   |
| 1079.537 | 5  | P05787        | R.QLYEEIE.R.QLYEEIE         | 2 | 0.195  | 0.002    | 0.001     | 0 | 33.5  | 19 | 230 | 15 | 483  | 1     |
| 950.398  | 6  | P05787        | R.ISSSFSR.V.ISS[166.9984]S  | 2 | -0.365 | 0.007    | 7.00E-04  | 0 | 27.9  | 19 | 230 | 15 | 483  | 0.75  |
| 1253.602 | 7  | P05787        | K.LVSESSDVLK.LV[166.9984]E  | 2 | 0.194  | 0.002    | 0.002     | 0 | 33.49 | 19 | 230 | 15 | 483  | 1.39  |
| 1424.642 | 8  | P05787        | R.ASLEAAIADA.AS[166.9984]L  | 2 | 0.708  | 6.20E-04 | 0.002     | 0 | 38.63 | 19 | 161 | 11 | 483  | 1.29  |
| 1045.552 | 5  | P05787        | R.QLETGLQEK.L.QLETGLQEK     | 2 | -0.8   | 0.018    | 7.00E-04  | 0 | 23.53 | 19 | 253 | 13 | 483  | 0.67  |
| 1169.551 | 6  | P05787        | R.AEAESMYQIK.AEAESMYQIK     | 2 | 0.317  | 0.002    | 0.002     | 0 | 32.7  | 17 | 253 | 13 | 483  | 1.66  |
| 1084.462 | 9  | P05787        | K.DVDEAYMKN.DVDEAYMKN       | 2 | -0.921 | 0.027    | 7.00E-04  | 0 | 17.32 | 14 | 108 | 11 | 483  | 0.62  |
| 1173.636 | 9  | P05787        | K.LVSESSDVLK.LVSESSDVLK     | 2 | -0.099 | 0.004    | 0.001     | 0 | 29.56 | 18 | 224 | 16 | 483  | 1.08  |
| 1555.664 | 9  | P05787        | R.LESGMQNM.LESGMQNM[1       | 2 | -0.854 | 0.022    | 0.003     | 0 | 22.01 | 18 | 161 | 11 | 483  | 2.18  |
| 1079.512 | 7  | P05787,Q9567  | K.AQYEDIANR.AQYEDIANR       | 2 | -0.255 | 0.005    | 9.00E-04  | 0 | 27.98 | 18 | 216 |    |      | 2.85  |
| 907.396  | 6  | P05787,Q9567  | K.FASFDK.V.FAS[166.9984]I   | 2 | 0.917  | 3.40E-04 | 0.001     | 0 | 38.72 | 17 | 230 |    |      | 1.32  |
| 827.43   | 5  | P05787,Q9567  | K.FASFDK.V.FASFDK           | 2 | -0.557 | 0.011    | 0.001     | 0 | 23.58 | 17 | 230 |    |      | 1.36  |
| 1153.556 | 6  | P05787,P0253E | K.EYQELMNVK.EYQELMNVK       | 2 | -0.186 | 0.004    | 0.001     | 0 | 26.69 | 16 | 230 |    |      | 1.08  |
| 1303.557 | 7  | P06241,P0623E | R.LIEDNEYAR.LIEDNEY[243.0   | 2 | 0.643  | 6.60E-04 | 0.002     | 0 | 36.97 | 18 | 37  |    |      | 1.27  |
| 883.407  | 5  | P06400        | K.FPSSPLR.I.FPSS[166.9984]  | 2 | 0.066  | 0.003    | 1.00E-04  | 0 | 30.21 | 17 | 68  | 7  | 928  | 0.08  |
| 1204.609 | 11 | P06400        | K.TAVIRINGR.TAVIRINGR[166   | 2 | 0.038  | 0.003    | 0.002     | 0 | 31.93 | 19 | 78  | 10 | 928  | 1.29  |
| 1995.553 | 10 | P06400        | K.SNLDEEVNWI.SNLDEEVNVI     | 3 | 0.669  | 0.007    | 0.003     | 0 | 27.01 | 18 | 78  | 10 | 928  | 1.49  |
| 1687.753 | 6  | P06400        | K.ISEGLPTTKV.ISEGLPT[181.01 | 3 | 0.028  | 0.034    | 0.002     | 1 | 20.65 | 18 | 50  | 7  | 928  | 1.5   |
| 1687.753 | 11 | P06400        | K.ISEGLPTTKV.ISEGLPT[181.01 | 3 | 0.164  | 0.025    | 0.002     | 1 | 21.96 | 18 | 78  | 10 | 928  | 1.5   |
| 883.407  | 5  | P06400        | K.FPSSPLR.I.FPSS[166.9984]S | 2 | 0.342  | 0.002    | 7.00E-04  | 0 | 32.97 | 17 | 63  | 7  | 928  | 0.76  |
| 2074.944 | 19 | P06400        | K.LTQTDSDISE.LTQTDSDISFET   | 3 | 0.055  | 0.029    | 0.002     | 1 | 20.88 | 18 | 49  | 6  | 928  | 1.16  |
| 1131.528 | 9  | P06454        | K.EVVEEAENG.EVVEEAENGR      | 2 | -0.798 | 0.018    | 0.002     | 0 | 22.57 | 18 | 23  | 3  | 111  | 1.83  |
| 1345.548 | 6  | P06493,P2494  | K.IGEGTYGVVY.IGEGTY[181.014 | 2 | 0.332  | 0.001    | 0.002     | 0 | 32.87 | 17 | 78  |    |      | 1.66  |
| 1265.581 | 8  | P06493,P2494  | K.IGEGTYGVVY.IGEGTY[181.014 | 2 | 1.735  | 6.10E-05 | 0.002     | 0 | 46.9  | 17 | 57  |    |      | 1.31  |
| 1265.581 | 5  | P06493,P2494  | K.IGEGTYGVVY.IGEGTY[243.02  | 2 | -0.217 | 0.006    | 0.002     | 0 | 27.38 | 17 | 57  |    |      | 1.15  |
| 1960.925 | 25 | P06733        | K.DATNVGDEG.DATNVGDEGG      | 3 | 1.291  | 9.70E-04 | 0.004     | 0 | 36.35 | 19 | 79  | 8  | 434  | 1.91  |
| 1280.586 | 12 | P06733        | K.LMIEMDGETE.LMIEMDGETEN    | 2 | -0.751 | 0.017    | 0.001     | 0 | 23.04 | 18 | 94  | 6  | 434  | 1.04  |
| 801.472  | 5  | P06733        | K.EGLELLK.T.EGLELLK         | 2 | -0.384 | 0.008    | 9.00E-04  | 0 | 25.71 | 17 | 94  | 6  | 434  | 1.1   |
| 1425.726 | 7  | P06733        | R.YISPDQLADLY.YISPDQLADLYK  | 2 | -0.879 | 0.024    | 0.004     | 0 | 19.74 | 16 | 99  | 6  | 434  | 1.76  |
| 1568.73  | 8  | P06748        | K.VDNDEHQ.VDNDEHQ[LS        | 2 | 2.159  | 1.90E-05 | 0.002     | 0 | 52.85 | 18 | 58  | 3  | 294  | 1.26  |
| 1316.644 | 8  | P06753        | K.AADAEAEVA.AADAEAEVASL     | 2 | 1.011  | 2.80E-04 | -2.00E-04 | 0 | 39.66 | 17 | 40  | 2  | 284  | -0.18 |
| 1694.896 | 12 | P07195        | K.LIAPVAEEAT.LIAPVAEEATV    | 2 | 1.295  | 1.40E-04 | 0.002     | 0 | 41.5  | 16 | 42  | 1  | 334  | 1.42  |
| 1213.537 | 7  | P07237        | K.NFEDVAFDEK.NFEDVAFDEK     | 2 | 0.954  | 3.50E-04 | 0.002     | 0 | 38.09 | 16 | 45  | 3  | 508  | 1.44  |
| 1451.701 | 6  | P07237        | K.YKPESELTAE.YKPESELTAE     | 3 | 0.272  | 0.016    | 8.00E-04  | 0 | 24.04 | 19 | 45  | 3  | 508  | 0.54  |
| 1037.49  | 5  | P07237        | R.NNFEGEVTK.NNFEGEVTK       | 2 | -0.934 | 0.027    | -8.00E-04 | 0 | 19.19 | 16 | 39  | 3  | 508  | -0.78 |
| 1038.558 | 6  | P07237        | K.DHENIVIAK.DHENIVIAK       | 2 | -0.37  | 0.007    | 6.00E-04  | 0 | 27.84 | 19 | 52  | 3  | 508  | 0.57  |
| 1787.812 | 6  | P07339        | R.DPDAQPGE.DPDAQPGE[LS      | 2 | 0.021  | 0.003    | 0.002     | 0 | 31.76 | 19 | 32  | 1  | 412  | 0.94  |
| 1908.882 | 9  | P07355        | R.AEDGSVIDY.AEDGSVIDY[LI    | 2 | 2.159  | 7.90E-06 | 0.002     | 0 | 56.54 | 18 | 220 | 13 | 339  | 0.98  |
| 1111.553 | 8  | P07355        | R.QDIAFAYOR.QDIAFAYOR       | 2 | 0.222  | 0.002    | 0.002     | 0 | 32.77 | 18 | 220 | 13 | 339  | 2.1   |
| 2064.983 | 17 | P07355        | R.RAEDGSVIDY.RAEDGSVIDY[LI  | 2 | 1.393  | 2.50E-05 | 0.002     | 1 | 50.82 | 17 | 308 | 12 | 339  | 0.76  |
| 1244.623 | 14 | P07355,A6NM   | R.TNQLQEINR.TNQLQEINR       | 2 | 1.521  | 1.00E-04 | 0.002     | 0 | 46.76 | 19 | 220 |    |      | 1.91  |
| 1096.498 | 5  | P07355,A6NM   | K.ALLYLCGGDD.ALLYLC[160.03] | 2 | 1.262  | 1.70E-04 | 0.002     | 0 | 40.17 | 15 | 220 |    |      | 1.52  |
| 1087.599 | 8  | P07355,A6NM   | R.DALNIETAIK.DALNIETAIK     | 2 | 2.048  | 2.50E-05 | 0.001     | 0 | 53.03 | 20 | 220 |    |      | 1.07  |
| 1924.869 | 7  | P07355,A6NM   | K.LSLEGDHSTP.LSLEGDHST[18   | 2 | 1.077  | 2.50E-04 | 0.003     | 0 | 42.32 | 19 | 260 |    |      | 1.51  |
| 1225.57  | 8  | P07355,A6NM   | K.DISDTSQDGR.DISDTSQDGR     | 2 | 2.159  | 5.00E-06 | 0.001     | 0 | 57.84 | 17 | 220 |    |      | 1.04  |
| 1924.869 | 15 | P07355,A6NM   | K.LSLEGDHSTP.LSLEGDHSTPPS   | 3 | -0.112 | 0.041    | 0.003     | 0 | 20.22 | 19 | 242 |    |      | 1.66  |
| 1924.869 | 16 | P07355,A6NM   | K.LSLEGDHSTP.LSLEGDHSTPPS   | 3 | 0.133  | 0.002    | 8.00E-04  | 0 | 32.88 | 19 | 149 |    |      | 0.41  |
| 1086.485 | 7  | P07355,A6NM   | K.AYTNFDAER.AYTNFDAER       | 2 | -1.115 | 0.039    | 4.00E-04  | 0 | 19.4  | 18 | 260 |    |      | 0.33  |
| 1736.775 | 7  | P07550        | R.FHVQNLQVE.FHVQNL[166.5    | 2 | -0.658 | 0.014    | 0.002     | 0 | 24.95 | 19 | 25  | 2  | 413  | 1.16  |
| 1213.612 | 5  | P07737        | K.DSPSVWAAV.DSPSVWAAVPC     | 2 | -0.039 | 0.004    | 0.001     | 0 | 29.16 | 17 | 29  | 1  | 140  | 1.18  |
| 1587.736 | 11 | P07814        | K.NQGGGLSSC.NQGGGLSSGA      | 2 | 2.159  | 2.90E-06 | 0.002     | 0 | 61.52 | 19 | 114 | 6  | 1512 | 1.03  |
| 1215.944 | 11 | P07814        | K.EYIPQPPLSC.EYIPQPPLSQS    | 2 | 1.232  | 1.70E-04 | 0.002     | 0 | 44.87 | 20 | 114 | 6  | 1512 | 0.82  |
| 1215.944 | 10 | P07814        | K.EYIPQPPLSC.EYIPQPPLSQS    | 2 | 1.761  | 5.10E-05 | 0.002     | 0 | 50.16 | 20 | 89  | 4  | 1512 | 0.82  |
| 2205.91  | 8  | P07814        | K.EYIPQPPLSC.EYIPQPPLSQS    | 2 | -0.518 | 0.011    | 0.003     | 0 | 26.35 | 19 | 105 | 4  | 1512 | 1.33  |
| 2205.91  | 9  | P07814        | K.EYIPQPPLSC.EYIPQPPLSQS    | 2 | -0.13  | 0.004    | 0.003     | 0 | 30.25 | 19 | 114 | 6  | 1512 | 1.33  |
| 1188.502 | 6  | P07900        | R.DNSTMGYMI.DNSTMGYMAA      | 2 | -0.05  | 0.004    | 0.001     | 0 | 29.05 | 17 | 393 | 17 | 732  | 0.89  |
| 2400.981 | 17 | P07900        | K.ESEDKPEIDV.ESEDKPEIDVG    | 2 | 0.664  | 6.90E-04 | 6.00E-04  | 1 | 36.19 | 17 | 325 | 19 | 732  | 0.24  |
| 2192.92  | 13 | P07900        | K.ESEDKPEIDV.ESEDKPEIDVG    | 2 | 2.159  | 1.10E-06 | 0.001     | 0 | 64.83 | 18 | 393 | 17 | 732  | 0.48  |
| 2272.886 | 18 | P07900        | K.ESEDKPEIDV.ESEDKPEIDVG    | 2 | 2.159  | 1.40E-05 | 0.002     | 0 | 53    | 17 | 393 | 17 | 732  | 1.11  |
| 1235.601 | 7  | P07900        | K.DQVANSFV.DQVANSFV         | 2 | 1.482  | 1.10E-04 | 0.001     | 0 | 44.37 | 17 | 393 | 17 | 732  | 0.9   |
| 1833.781 | 20 | P07900        | R.NPDDITNEE.NPDDITNEEYGI    | 2 | 1.944  | 3.80E-07 | 0.001     | 0 | 69.51 | 18 | 318 | 16 | 732  | 0.74  |
| 2400.981 | 6  | P07900        | K.ESEDKPEIDV.ES[166.9984]E  | 4 | 0.451  | 0.011    | 0.002     | 1 | 24.12 | 17 | 304 | 15 | 732  | 0.74  |
| 1242.705 | 7  | P07900,P0823E | K.ADUNLNGTIA.ADUNLNGTIAK    | 2 | 2.159  | 1.00E-05 | 0.002     | 0 | 55.16 | 18 | 393 |    |      | 1.21  |
| 1416.638 | 15 | P07900,P0823E | K.EGLELPEDEF.EGLELPEDEEEK   | 2 | -0.964 | 0.031    | 0.002     | 0 | 21.91 | 19 | 325 |    |      | 1.47  |
| 1291.638 | 7  | P07900,Q1456I | R.EUSNSSDALD.EUSNSSDALDK    | 2 | 1.466  | 1.10E-04 | 0.001     | 0 | 45.21 | 18 | 304 |    |      | 1.11  |
| 2778.968 | 18 | P07910        | K.MESEGGADD.MESEGGADD[3     | 3 | 1.291  | 7.50E-07 | 9.00E-04  | 0 | 63.28 | 15 | 91  | 3  | 306  | 0.33  |
| 2019.657 | 12 | P07910        | K.EAEEGEDDR.EAEEGEDDRD      | 3 | 0.638  | 0.007    | 0.005     | 1 | 22.74 | 14 | 59  | 3  | 306  | 2.59  |
| 1159.612 | 8  | P07910,Q6081  | K.VDSLLENLEK.VDSLLENLEK     | 2 | -0.673 | 0.015    | 0.002     | 0 | 23.81 | 18 | 84  |    |      | 1.32  |
| 1243.509 | 8  | P07948        | K.DSLSDGDV.DSL[166.9984]    | 2 | 1.333  | 1.40E-04 | 0.001     | 0 | 41.88 | 16 | 82  | 3  | 512  | 1.07  |
| 1428.625 | 16 | P07948        | K.GKDSLSDGV.GKDSL[166.9984] | 2 | 1.824  | 5.00E-05 | 0.002     | 1 | 48.79 | 18 | 82  |    |      |       |

|          |    |               |                                  |        |          |           |   |       |    |     |    |  |      |       |
|----------|----|---------------|----------------------------------|--------|----------|-----------|---|-------|----|-----|----|--|------|-------|
| 1752.624 | 13 | P08559,P2980  | R.YHGHSMDP YHGHS[166.99] 3       | 0.049  | 0.031    | 0.002     | 0 | 18.85 | 16 | 85  |    |  |      | 0.97  |
| 1980.826 | 10 | P08581        | R.SVSPPTMVS SVS[166.9984]F 2     | 2.159  | 6.30E-07 | 5.00E-04  | 0 | 67.85 | 18 | 68  | 1  |  | 1390 | 0.24  |
| 1980.826 | 12 | P08581        | R.SVSPPTMVS SVS[166.9984]V 2     | 2.025  | 6.40E-07 | 5.00E-04  | 0 | 67.77 | 18 | 68  | 2  |  | 1390 | 0.24  |
| 1659.732 | 9  | P08621        | R.GGGGGQDN GGGGGQDNGL 2          | 2.159  | 1.20E-06 | 0.002     | 0 | 63.86 | 17 | 138 | 5  |  | 437  | 1     |
| 1739.698 | 11 | P08621        | R.GGGGGQDN GGGGGQDNGL 2          | 2.159  | 3.40E-06 | 3.00E-04  | 0 | 58.18 | 16 | 138 | 5  |  | 437  | 0.19  |
| 1600.727 | 6  | P08621        | R.YDERPSPPLU YDERPSPS[166.2      | -1.094 | 0.039    | 0.002     | 0 | 19.61 | 18 | 138 | 5  |  | 437  | 1.09  |
| 3453.358 | 13 | P08621        | R.GGGGDMAEI GGGGDMAEPS 3         | 0.685  | 0.007    | 0.003     | 0 | 25.17 | 16 | 138 | 5  |  | 437  | 0.89  |
| 1495.621 | 5  | P08651        | K.SPFNSPQD S[166.9984]PF 2       | -0.871 | 0.021    | -0.002    | 0 | 21.84 | 18 | 35  | 2  |  | 508  | -1.41 |
| 1495.621 | 8  | P08651        | K.SPFNSPQD S[166.9984]PF 2       | -0.075 | 0.003    | 0.002     | 0 | 30.3  | 17 | 35  | 2  |  | 508  | 1.47  |
| 1729.714 | 9  | P08651        | R.NWTTEDMEG NWTTEDMEGGI 2        | 0.51   | 9.60E-04 | 0.003     | 0 | 36.65 | 19 | 63  | 3  |  | 508  | 1.92  |
| 1508.678 | 8  | P08670        | R.SLYASSPGGV SLYASS[166.99] 2    | 2.159  | 1.20E-05 | 0.001     | 0 | 53.47 | 17 | 98  | 9  |  | 466  | 0.87  |
| 1076.504 | 6  | P08670        | R.DNLAEIDMR DNLAEIDMR 2          | 0.849  | 4.90E-04 | 0.002     | 0 | 36.04 | 15 | 80  | 8  |  | 466  | 1.44  |
| 1836.799 | 11 | P08670        | R.DGQVINETSC DGQVINETSQH 2       | 0.43   | 0.001    | 0         | 0 | 36.85 | 20 | 96  | 9  |  | 466  | 0.01  |
| 1916.766 | 8  | P08670        | R.DGQVINETSC DGQVINETS[16.2      | -0.377 | 0.008    | 0.002     | 0 | 27.78 | 19 | 144 | 10 |  | 466  | 0.78  |
| 1916.766 | 13 | P08670        | R.DGQVINETSC DGQVINETS[181.2     | -0.578 | 0.012    | 0.002     | 0 | 25.75 | 19 | 105 | 8  |  | 466  | 0.78  |
| 1323.618 | 7  | P08670        | R.EEAENTLQSF EEAENTLQSF 2        | -0.403 | 0.007    | 0.002     | 0 | 25.53 | 17 | 100 | 9  |  | 466  | 1.58  |
| 1115.569 | 11 | P08670,P1766  | K.VELQELNDR.F VELQELNDR 2        | 0.429  | 0.001    | 8.00E-04  | 0 | 34.84 | 18 | 98  |    |  | 0.71 |       |
| 1389.686 | 10 | P08727        | K.AALEDTLAET AALEDTLAET# 2       | 2.119  | 3.40E-07 | 0.002     | 0 | 69.48 | 17 | 008 | 10 |  | 400  | 1.17  |
| 1082.49  | 7  | P08727        | K.DAEAWFTSR DAEAWFTSR 2          | 1.197  | 2.00E-04 | 0.001     | 0 | 40.52 | 16 | 251 | 8  |  | 400  | 1.26  |
| 1634.717 | 14 | P08727        | R.QSSATSFQGG QSSATSF[166.9       | 2.159  | 1.90E-06 | 0.002     | 0 | 63    | 18 | 251 | 8  |  | 400  | 1.27  |
| 1554.751 | 10 | P08727        | R.QSSATSFQGG QSSATSFQGLC 2       | 2.159  | 7.00E-06 | 0.002     | 0 | 57.08 | 18 | 251 | 8  |  | 400  | 1.55  |
| 1354.606 | 8  | P08727        | R.SQYEVMAEQ SQYEVMAEQNI 2        | 2.159  | 7.10E-06 | 0.001     | 0 | 58.37 | 19 | 251 | 8  |  | 400  | 1.07  |
| 1634.717 | 14 | P08727        | R.QSSATSFQGG QSSATSFQGLC 2       | 2.159  | 1.50E-06 | 0.002     | 0 | 64.13 | 18 | 251 | 8  |  | 400  | 1.39  |
| 1634.717 | 13 | P08727        | R.QSSATSFQGG QSS[166.9984] 2     | 2.119  | 1.50E-06 | 0.003     | 0 | 64.56 | 19 | 403 | 10 |  | 400  | 1.82  |
| 1984.865 | 10 | P08727        | R.SLLEGQEDHY SLLEGQEDHYNI 3      | -0.044 | 0.038    | 0.002     | 0 | 19.91 | 18 | 208 | 9  |  | 400  | 0.89  |
| 1634.717 | 10 | P08727        | R.QSSATSFQGG QSSATSF[166.99      | 2.274  | 2.50E-06 | 0.002     | 0 | 61.78 | 18 | 208 | 9  |  | 400  | 1.27  |
| 850.457  | 9  | P08727        | R.FGPGVAFR.A FGPGVAFR 2          | 1.324  | 1.30E-04 | 7.00E-04  | 0 | 38.8  | 13 | 341 | 11 |  | 400  | 0.81  |
| 1041.605 | 8  | P08727,P0578  | R.IVLQIDNAR.L IVLQIDNAR 2        | -0.371 | 0.008    | 0.001     | 0 | 24.84 | 16 | 171 |    |  | 1.15 |       |
| 1201.606 | 9  | P08729        | K.LEAAIAEAEF LEAAIAEAEER 2       | 2.159  | 6.70E-06 | 8.00E-04  | 0 | 57.29 | 18 | 165 | 7  |  | 469  | 0.63  |
| 1197.546 | 8  | P08729        | R.SMQDVFDF SMQDVFDFK 2           | 2.159  | 2.00E-05 | 0.002     | 0 | 51.9  | 17 | 165 | 7  |  | 469  | 1.32  |
| 1186.606 | 8  | P08729        | K.QEELEAALQR QEELEAALQR 2        | 1.872  | 4.50E-05 | 0.001     | 0 | 49.27 | 18 | 165 | 7  |  | 469  | 0.93  |
| 1043.573 | 11 | P08729        | R.LQAEIDNIKN LQAEIDNIK 2         | 0.032  | 0.003    | 7.00E-04  | 0 | 29.87 | 17 | 165 | 7  |  | 469  | 0.65  |
| 992.447  | 6  | P08729        | R.NEISEMNR.A NEISEMNR 2          | -1.142 | 0.041    | 0.001     | 0 | 19.13 | 18 | 149 | 6  |  | 469  | 1.18  |
| 1184.546 | 9  | P08729        | R.SAYGPGVAVS[166.9984]AV 2       | 0.029  | 0.003    | 0.001     | 0 | 31.82 | 19 | 118 | 6  |  | 469  | 1.13  |
| 1118.54  | 5  | P08758        | K.ALLLCCGEDD ALLLCC[160.03] 2    | -0.969 | 0.032    | 0.002     | 0 | 19.86 | 17 | 31  | 2  |  | 320  | 1.62  |
| 831.446  | 5  | P09525        | R.DUDDLK.S DUDDLK 2              | -0.104 | 0.004    | 0.001     | 0 | 28.51 | 17 | 29  | 2  |  | 319  | 1.55  |
| 1774.666 | 12 | P09651        | R.NQGGYGGSS NQGGYGGSSSS 2        | 2.159  | 8.40E-06 | 0.003     | 0 | 53.04 | 15 | 185 | 6  |  | 372  | 1.79  |
| 1694.7   | 11 | P09651        | R.NQGGYGGSS NQGGYGGSSSS 2        | 2.119  | 5.40E-10 | 0.004     | 0 | 97.24 | 17 | 213 | 6  |  | 372  | 2.07  |
| 1774.666 | 12 | P09651        | R.NQGGYGGSS NQGGYGGSSSS 2        | 0.914  | 4.20E-04 | -7.00E-04 | 0 | 36.69 | 15 | 213 | 6  |  | 372  | -0.41 |
| 1379.62  | 8  | P09651        | K.SESPKEPQLF SES[166.9984]F 2    | -0.567 | 0.011    | 0.003     | 1 | 25.88 | 19 | 185 | 6  |  | 372  | 1.88  |
| 1774.666 | 11 | P09651        | R.NQGGYGGSS NQGGYGGSSSS 2        | 2.274  | 1.60E-05 | 0.003     | 0 | 50.45 | 15 | 173 | 4  |  | 372  | 1.68  |
| 1774.666 | 7  | P09651        | R.NQGGYGGSS NQGGYGGSSSS 2        | 0.892  | 4.40E-04 | -7.00E-04 | 0 | 36.45 | 15 | 198 | 7  |  | 372  | -0.41 |
| 1049.457 | 10 | P09651,Q32P5  | R.DYFEQYK.I DYFEQYK 2            | -0.088 | 0.004    | 0.001     | 0 | 26.67 | 15 | 185 |    |  | 0.91 |       |
| 1206.54  | 6  | P09661        | K.GGSPGQDVE/GGSP[166.9984] 2     | -1.011 | 0.029    | 0.002     | 0 | 21.44 | 19 | 21  | 1  |  | 255  | 1.66  |
| 1265.601 | 10 | P09972        | R.DNAGAATEE DNAGAATEEF 2         | -0.319 | 0.007    | 0.002     | 0 | 27.36 | 18 | 27  | 1  |  | 364  | 1.27  |
| 1993.913 | 12 | POC126        | R.RTPAPPPEGS RTPAPPPEGS[1 3      | 0.813  | 0.006    | 0.002     | 1 | 27.45 | 17 | 27  | 2  |  | 253  | 0.89  |
| 1279.594 | 6  | POC263        | K.LTDFGHTPR LDFGHT[181.C 2       | -0.914 | 0.025    | -0.003    | 0 | 20.41 | 17 | 20  | 1  |  | 348  | -2.12 |
| 1549.662 | 12 | P10075        | R.SPGSQAPDEC S[166.9984]PG 2     | 1.789  | 4.70E-05 | 0.002     | 0 | 47.44 | 17 | 47  | 1  |  | 376  | 1.53  |
| 1817.732 | 11 | P10244        | K.EEENSEELAV EEENSEELAV 2        | -0.388 | 0.008    | 0.004     | 0 | 25.65 | 17 | 26  | 1  |  | 700  | 2.16  |
| 3751.537 | 17 | P10588        | R.AAEDDSASPP AAEDDSASPPG 3       | 1.224  | 6.60E-04 | 0.007     | 0 | 36.69 | 17 | 37  | 2  |  | 404  | 1.99  |
| 3751.537 | 23 | P10588        | R.AAEDDSASPP AAEDDSAS[166.3      | 1.193  | 0.002    | 0.007     | 0 | 31.92 | 17 | 32  | 1  |  | 404  | 1.99  |
| 2056.959 | 16 | P10644        | R.TDSREDEISPP TDSREDEIS[166.3    | 1.048  | 0.003    | 0.003     | 1 | 30.8  | 18 | 59  | 3  |  | 381  | 1.57  |
| 1597.751 | 11 | P10644        | R.EDEISPPPPNF EDEIS[166.9984] 2  | 0.625  | 8.20E-04 | 0.002     | 0 | 37.8  | 19 | 59  | 3  |  | 381  | 1.18  |
| 1424.682 | 14 | P10809        | R.TVIIQSWGSI TVIIQSWGSI[1 2      | 1.756  | 5.70E-05 | 0.002     | 0 | 48.11 | 18 | 48  | 1  |  | 573  | 1.47  |
| 1215.658 | 13 | P10809        | K.NAGVEGSLIV NAGVEGSLIVE# 2      | 0.421  | 0.001    | 0.001     | 0 | 35.75 | 19 | 67  | 2  |  | 573  | 0.88  |
| 912.588  | 6  | P10809        | K.VGLQVAVK.V GLQVAVK 2           | 0.456  | 9.70E-04 | 0.001     | 0 | 38.11 | 13 | 53  | 2  |  | 573  | 1.22  |
| 1430.691 | 9  | P11021        | R.TWINDPSVQC TWINDPSVQQD 2       | 0.61   | 7.70E-04 | 5.00E-04  | 0 | 36.65 | 20 | 73  | 3  |  | 654  | 0.32  |
| 1559.721 | 10 | P11137        | R.VDHGAIEITQ VDHGAIEITQS[ 3      | 1.291  | 5.90E-04 | 0.002     | 0 | 37.83 | 18 | 96  | 7  |  | 1827 | 1.05  |
| 1953.942 | 10 | P11137        | K.KETSPRESSLIQ KETSPRESS[166.1 3 | 0.058  | 0.031    | 0.004     | 1 | 20.92 | 18 | 105 | 9  |  | 1827 | 1.79  |
| 1825.847 | 6  | P11137        | K.KETSPRESSLIQ KETSPRESS[166.1 3 | -0.367 | 0.008    | 0.003     | 0 | 28.88 | 20 | 96  | 7  |  | 1827 | 1.4   |
| 1649.795 | 22 | P11142        | K.NQVAMNPTA NQVAMNPTNT 2         | 2.159  | 7.90E-06 | 0.002     | 0 | 57.4  | 19 | 184 | 6  |  | 646  | 1.53  |
| 1199.674 | 10 | P11142        | K.DAGTIAGLV DAGTIAGLVLI 2        | 1.371  | 1.40E-04 | 0.002     | 0 | 44.26 | 18 | 184 | 6  |  | 646  | 1.87  |
| 1228.628 | 10 | P11142,P0810  | R.VEHANDQGN VEHANDQGNR 2         | 2.127  | 5.30E-06 | 0.002     | 0 | 56.44 | 16 | 123 |    |  | 1.21 |       |
| 1487.701 | 7  | P11142,P0810  | R.TTSPYVAFD TTSPYVAFDTE 2        | 1.446  | 1.20E-04 | 0.002     | 0 | 45.01 | 18 | 184 |    |  | 1.7  |       |
| 1659.895 | 8  | P11142,P11021 | R.IINEPTAAAIA IINEPTAAAIAV 2     | 1.954  | 2.50E-04 | 0.004     | 0 | 39.09 | 16 | 205 |    |  | 2.25 |       |
| 1691.726 | 12 | P11142,P5465  | K.STAGDTHLGC STAGDTHLGGE 2       | 1.016  | 4.10E-05 | 0.004     | 0 | 50.71 | 19 | 184 |    |  | 2.37 |       |
| 1719.763 | 7  | P11166        | K.TPEELFPLG/TPEELFPLGLAD 2       | -0.781 | 0.017    | 0.002     | 0 | 24.72 | 20 | 25  | 1  |  | 492  | 0.96  |
| 2347.024 | 15 | P11274        | R.HQDGLPYIDD HQDGLPYIDDS[ 3      | 0.998  | 0.004    | 0.003     | 0 | 30.3  | 18 | 30  | 2  |  | 1271 | 1.19  |
| 2347.024 | 15 | P11274        | R.HQDGLPYIDD HQDGLPYIDDS[ 3      | 0.517  | 0.011    | 0.003     | 0 | 25.51 | 18 | 26  | 2  |  | 1271 | 1.19  |
| 1283.567 | 6  | P11387        | K.ENGFSSPQIH ENGFSS[166.99 2     | -0.919 | 0.025    | 8.00E-04  | 0 | 20.36 | 17 | 20  | 4  |  | 765  | 0.59  |
| 1742.628 | 20 | P11388        | K.VPDEEENES VPDEEENES[1 2        | 2.159  | 1.50E-07 | 0.004     | 0 | 71.03 | 15 | 345 | 14 |  | 1531 | 2.19  |
| 1356.593 | 12 | P11388        | K.SVVSLEADD SVVS[166.9984] 2     | 2.172  | 2.20E-06 | 0.002     | 0 | 61.95 | 18 | 335 | 12 |  | 1531 | 1.31  |
| 1308.602 | 7  | P11388        | K.TQMAEVLPS/TQMAEVLPS[1 2        | 2.178  | 2.60E-04 | 0.002     | 0 | 42.31 | 19 | 335 | 12 |  | 1531 | 1.11  |
| 1124.897 | 12 | P11388        | K.NENTEGSPQI NENTEGSPQ[166.1 2   | 1.059  | 1.40E-07 | 0.002     | 0 | 74.23 | 18 | 345 | 14 |  | 1531 | 0.97  |
| 2044.931 | 11 | P11388        | K.NENTEGSPQI NENTEGSPQ[166.1 2   | 0.819  | 5.10E-04 | 0.001     | 0 | 38.74 | 18 | 345 | 14 |  | 1531 | 0.58  |
| 1356.593 | 13 | P11388        | K.SVVSLEADD S[166.9984]V# 2      | 1.796  | 4.90E-05 | 0.002     | 0 | 48.51 | 18 | 296 | 11 |  | 1531 | 1.45  |
| 1699.673 | 13 | P11388        | K.TDDEDVPSD T[181.014]DDE 2      | -0.662 | 0.015    | 0.002     | 0 | 23.96 | 18 | 315 | 12 |  | 1531 | 0.9   |
| 1454.525 | 6  | P11388        | K.YLLESEDDLI YLEES[166.9984] 2   | -0.052 | 0.004    | 0.002     | 0 | 26.06 | 14 | 315 | 12 |  | 1531 | 1.75  |
| 1807.788 | 13 | P11413        | R.NSVYAGQYDI NSVYAGQYDD# 2       | 1.847  | 4.10E-05 | 0.003     | 0 | 49.01 | 18 | 49  | 1  |  | 515  | 1.46  |
| 2143.991 | 13 | P11474        | K.GSSETETEPPI GSS[166.9984] 2    | 1.39   | 1.40E-04 | 0.002     | 0 | 44.45 | 18 | 44  | 1  |  | 423  | 0.79  |
| 2143.991 | 21 | P11474        | K.GSSETETEPPI GSETET[181.014 2   | 1.126  | 2.60E-04 | 0.002     | 0 | 41.8  | 18 | 42  | 1  |  | 423  | 0.79  |
| 2143.991 | 9  | P11474        | K.GSSETETEPPI GSETET[181.0 3     | -0.054 | 0.039    | 0.002     | 0 | 19.82 | 18 | 41  | 2  |  | 423  | 1.02  |
| 2143.991 | 9  | P11474        | K.GSSETETEPPI GSS[166.9984]S 2   | -1.004 | 0.035    | 0.002     | 0 | 20.51 | 18 | 21  | 1  |  | 423  | 0.79  |
| 1161.502 | 5  | P11940,Q9H36  | K.NLDDGIDDER NLDDGIDDER 2        | -0.027 | 0.004    | 8.00E-04  | 0 | 28.28 | 16 | 28  |    |  | 0.66 |       |
| 1104.41  | 10 | P12268        | R.GMGSIDAMI GMGS[166.998 2       | 1.9    | 3.70E-05 | 0.001     | 0 | 44.55 | 13 | 45  | 2  |  | 514  | 1.08  |
| 2566.032 | 13 | P1            |                                  |        |          |           |   |       |    |     |    |  |      |       |

|          |    |               |                                    |        |          |           |   |       |    |     |   |      |       |
|----------|----|---------------|------------------------------------|--------|----------|-----------|---|-------|----|-----|---|------|-------|
| 3041.132 | 20 | P14314        | R.VNDGVDCDC VNDGVC[160.0] 3        | 1.224  | 8.10E-05 | 0.002     | 0 | 44.64 | 16 | 45  | 1 | 528  | 0.64  |
| 1019.516 | 12 | P14618        | K.GDYPLEAVR.I GDYPLEAVR 2          | 1.154  | 2.50E-04 | 6.00E-04  | 0 | 41.09 | 17 | 139 | 6 | 531  | 0.57  |
| 1197.647 | 6  | P14618        | R.LDIDSPITAR LDIDSPITAR 2          | 0.479  | 0.001    | 0.002     | 0 | 32.34 | 15 | 116 | 7 | 531  | 1.36  |
| 1277.614 | 8  | P14618        | R.LDIDSPITAR LDIDSPITAR[166.998] 2 | 1.251  | 1.80E-04 | 0.002     | 0 | 42.06 | 17 | 139 | 6 | 531  | 1.34  |
| 1359.705 | 9  | P14618        | R.NTGICTGPA NTGICTGPA[160.03] 2    | 0.117  | 0.003    | 0.002     | 0 | 29.72 | 16 | 139 | 6 | 531  | 1.32  |
| 1636.891 | 17 | P14618        | K.GVNLPGAAVI GVNLPGAAVD 2          | 2.01   | 3.20E-05 | 0.002     | 0 | 46.65 | 14 | 139 | 6 | 531  | 0.94  |
| 1197.582 | 5  | P14618        | K.ITLDNAYMEK ITLDNAYMEK 2          | -0.083 | 0.004    | 0.002     | 0 | 29.72 | 18 | 139 | 6 | 531  | 1.36  |
| 1642.771 | 9  | P14618        | K.DPVQEAWEA DPVQEAWEAD 2           | 2.274  | 8.90E-09 | 0.003     | 0 | 87.29 | 19 | 138 | 5 | 531  | 1.99  |
| 840.53   | 7  | P14618        | R.APIAVTR.N APIAVTR 2              | 1.144  | 2.10E-04 | 9.00E-04  | 0 | 38    | 14 | 20  | 8 | 531  | 1.01  |
| 1141.61  | 9  | P14618,P30613 | R.GDLGIEPAEK GDGIEPAEK 2           | -0.23  | 0.006    | 0.002     | 0 | 26.25 | 16 | 116 | 6 | 531  | 1.31  |
| 1946.691 | 11 | P14625        | K.EESDDEAAVE EES[166.9984] 2       | 2.159  | 5.90E-07 | 0.002     | 0 | 63.42 | 14 | 133 | 4 | 803  | 0.89  |
| 2332.871 | 17 | P14625        | K.EEKESDDEA EEKES[166.99] 3        | 1.291  | 6.80E-04 | 0.003     | 1 | 34.58 | 15 | 133 | 4 | 803  | 1.25  |
| 1508.699 | 6  | P14859        | R.INPPSSGGTS: INPPSSGGTSS[1] 2     | -0.086 | 0.004    | 0.002     | 0 | 30.69 | 19 | 31  | 1 | 743  | 1.12  |
| 1508.699 | 9  | P14859        | R.INPPSSGGTS: INPPSSGGTSS[2] 2     | -0.2   | 0.005    | 0.002     | 0 | 29.53 | 19 | 30  | 1 | 743  | 1.12  |
| 2981.203 | 28 | P14866        | K.TDNAGDQHG TDNAGDQHG 3            | 1.291  | 1.60E-06 | 0.004     | 0 | 63.17 | 18 | 76  | 3 | 589  | 1.48  |
| 2734.161 | 20 | P14866        | K.NDQDTWDYI NDQDTWDYTN 3           | 0.964  | 0.004    | 0.004     | 0 | 30.96 | 19 | 76  | 3 | 589  | 1.47  |
| 2144.812 | 9  | P14921        | K.LGGQDSFESIE LGGQDS[166.9] 2      | 2.119  | 4.70E-07 | 0.001     | 0 | 66.11 | 15 | 66  | 2 | 441  | 0.59  |
| 2253.977 | 14 | P15056        | R.ROSSDDWEIF RDS[166.9984] 3       | 0.14   | 0.022    | 0.004     | 1 | 23.75 | 20 | 24  | 1 | 766  | 1.55  |
| 1096.534 | 5  | P15311        | K.DNAMLEYLK DNAMLEYLK 2            | -0.52  | 0.009    | 0.001     | 0 | 23.33 | 16 | 23  | 1 | 586  | 1.29  |
| 1619.666 | 6  | P15374        | K.FLEESVMSPI FLEESVMS[16] 2        | -0.555 | 0.01     | 0.003     | 0 | 26    | 19 | 26  | 1 | 230  | 1.89  |
| 1619.666 | 7  | P15374        | K.FLEESVMSPI FLEESVMS[166.9] 2     | -1.135 | 0.04     | 0.003     | 0 | 20.19 | 19 | 20  | 1 | 230  | 1.89  |
| 1894.811 | 8  | P15407        | R.RRPECQISPEI RRP[160.0307] 2      | -0.956 | 0.031    | 7.00E-04  | 1 | 20.99 | 18 | 21  | 2 | 271  | 0.39  |
| 1955.812 | 12 | P15408        | K.QEPEEDSPS QEPEEDSPS[1] 2         | 1.645  | 7.20E-05 | 0.002     | 0 | 48    | 19 | 48  | 3 | 326  | 1.01  |
| 1230.57  | 6  | P15408        | R.SPPAPGLQPN S[166.9984]PP 2       | -0.765 | 0.019    | 0.002     | 0 | 19.89 | 15 | 70  | 3 | 326  | 1.67  |
| 1955.812 | 12 | P15408        | K.QEPEEDSPS QEPEEDS[166.2] 2       | 2.024  | 1.20E-06 | 0.002     | 0 | 65.79 | 19 | 67  | 2 | 326  | 1.01  |
| 1565.684 | 9  | P15531        | R.NIIHGSDSVES NIIHGS[166.99] 2     | 1.342  | 1.40E-04 | 0.002     | 0 | 43.97 | 18 | 44  | 2 | 152  | 1.61  |
| 1485.718 | 8  | P15531        | R.NIIHGSDSVES NIIHGS[166.99] 2     | 0.458  | 0.012    | 7.00E-04  | 0 | 24.93 | 18 | 63  | 2 | 152  | 0.5   |
| 1973.737 | 7  | P15924        | K.GGGGYTCQS GGGGYT[160.2] 2        | 0.24   | 0.002    | -3.00E-04 | 0 | 30.95 | 16 | 31  | 3 | 2871 | -0.14 |
| 1973.737 | 11 | P15924        | K.GGGGYTCQS GGGGYT[181.0] 2        | 1.222  | 1.80E-04 | -3.00E-04 | 0 | 40.75 | 16 | 41  | 5 | 2871 | -0.14 |
| 1423.658 | 13 | P16070        | K.LVINGNGAV LVINS[166.998] 2       | 1.356  | 1.50E-04 | 0.002     | 0 | 44.11 | 18 | 79  | 3 | 742  | 1.77  |
| 1264.576 | 7  | P16070        | K.SQEMVHLVNI S[166.9984]QE 2       | 2.011  | 2.80E-05 | 0.002     | 0 | 49.66 | 17 | 93  | 3 | 742  | 1.4   |
| 1634.669 | 9  | P16144        | R.DYSTLTVSSV DYSTLTVSS[16] 2       | 2.149  | 2.20E-05 | 0.002     | 0 | 51.04 | 17 | 69  | 5 | 1822 | 1.11  |
| 1207.572 | 8  | P16144        | R.LTAGVPDTR LTAGVPD[181.2] 2       | 0.233  | 0.002    | 0.002     | 0 | 31.88 | 17 | 52  | 5 | 1822 | 1.62  |
| 1634.669 | 9  | P16144        | R.DYSTLTVSSV DYSTLTVSS[166.2] 2    | 0.475  | 0.001    | 0.002     | 0 | 34.28 | 17 | 40  | 5 | 1822 | 1.11  |
| 1144.561 | 6  | P16144        | R.VLSTSTLRL VLS[166.9984] 2        | -1.13  | 0.038    | 0.001     | 0 | 21.28 | 20 | 65  | 4 | 1822 | 0.93  |
| 1533.731 | 10 | P16220        | K.IINDLSSDAPC IINDLSS[166.9] 2     | 0.933  | 3.60E-04 | 0.002     | 0 | 40.86 | 19 | 41  | 1 | 341  | 1.14  |
| 2409.072 | 11 | P16333        | K.RKPSVPSASI RKP[166.9984] 3       | 1.2    | 8.90E-04 | 0.003     | 1 | 36.79 | 19 | 37  | 1 | 377  | 1.07  |
| 1993.729 | 9  | P16383        | K.RESEDDPESE RESEDD[16] 3          | 0.039  | 0.03     | 0.003     | 1 | 18.73 | 16 | 19  | 2 | 781  | 1.53  |
| 1993.729 | 12 | P16383        | K.RESEDDPESE RESEDD[166.9984] 3    | 0.108  | 0.026    | 0.003     | 1 | 19.41 | 16 | 19  | 2 | 781  | 1.53  |
| 1093.552 | 5  | P16401        | K.ALAAGGYDVI ALAAGGYDVEK 2         | -0.57  | 0.011    | 0.001     | 0 | 23.83 | 17 | 24  | 1 | 226  | 0.92  |
| 1678.757 | 12 | P16401        | M.SETAPAETA SETAPAETAT[1] 2        | -1.009 | 0.029    | 0.002     | 0 | 21.45 | 19 | 21  | 1 | 226  | 1.43  |
| 1198.668 | 7  | P16403,P10412 | K.ASGPPVSELIT ASGPPVSELITK 2       | -0.275 | 0.005    | 0.002     | 0 | 26.8  | 17 | 66  | 6 | 195  | 0.67  |
| 1406.729 | 16 | P16403,P10412 | R.KASGPPVSELI KAS[166.9984] 3      | 1.029  | 0.003    | 0.001     | 1 | 30.61 | 18 | 66  | 6 | 195  | 0.89  |
| 1278.634 | 4  | P16403,P10412 | K.ASGPPVSELIT AS[166.9984]G 2      | -1.023 | 0.037    | 0.003     | 0 | 20.3  | 18 | 50  | 5 | 267  | 1.05  |
| 1107.568 | 8  | P16403,P10412 | K.ALAAGGYDVI ALAAGGYDVEK 2         | 0.589  | 7.30E-04 | 0.001     | 0 | 37.44 | 19 | 66  | 6 | 195  | 0.67  |
| 2753.236 | 31 | P16422        | R.AKPEGALQNI AKPEGALQNNC 3         | 0.922  | 0.004    | 0.004     | 0 | 31.57 | 20 | 32  | 1 | 314  | 1.31  |
| 1084.54  | 7  | P16435        | K.IQTLTSSVR.E IQTLTSS[166.9] 2     | 0.593  | 7.40E-04 | 6.00E-04  | 0 | 36.48 | 18 | 36  | 1 | 677  | 0.55  |
| 1385.573 | 8  | P16615        | R.EFDELNSAQ EFDELNS[166.2] 2       | -0.77  | 0.018    | 0.003     | 0 | 21.85 | 17 | 22  | 3 | 1042 | 1.9   |
| 1406.66  | 8  | P16949        | K.ESVPEFPLSP ESVPFPLS[166.2] 2     | 0.667  | 7.50E-04 | 0.003     | 0 | 36.22 | 17 | 51  | 5 | 149  | 2.27  |
| 1154.534 | 6  | P16949,Q9304  | K.DLSLEEIQ.K DLS[166.9984] 2       | -0.991 | 0.029    | 0.002     | 0 | 22.64 | 20 | 51  | 5 | 145  | 1.45  |
| 1074.568 | 7  | P16949,Q9304  | K.DLSLEEIQ.K DLSLEEIQ 2            | -0.536 | 0.012    | 0.002     | 0 | 25.19 | 18 | 51  | 5 | 145  | 1.4   |
| 1692.734 | 17 | P16989        | K.ENQATSGPI ENQATSGPNC 2           | -0.072 | 0.003    | 0.002     | 0 | 30.83 | 19 | 31  | 2 | 372  | 1.24  |
| 1961.812 | 18 | P16989        | K.AGEAPTENPA AGEAPTENPAP 2         | -0.23  | 0.006    | 0.001     | 0 | 27.24 | 17 | 46  | 2 | 372  | 0.67  |
| 1961.812 | 8  | P16989        | K.AGEAPTENPA AGEAPTENPAP 2         | -0.126 | 0.004    | 0.001     | 0 | 28.32 | 17 | 53  | 2 | 372  | 0.67  |
| 1818.644 | 12 | P17096        | K.EEEEQISQSS EEEEQISQSS[1] 2       | 2.159  | 3.20E-06 | 0.002     | 0 | 55.79 | 13 | 72  | 3 | 107  | 0.81  |
| 1063.471 | 4  | P17096        | K.EPSEVTPPK.R EPSEVTP[181.0] 2     | -0.734 | 0.017    | 0.001     | 0 | 21.2  | 16 | 62  | 3 | 107  | 1.11  |
| 1818.644 | 15 | P17096        | K.EEEEQISQSS EEEEQIS[166.9] 2      | -0.131 | 0.004    | -0.001    | 0 | 24.24 | 13 | 68  | 3 | 107  | -0.68 |
| 1818.644 | 18 | P17096        | K.EEEEQISQSS EEEEQISQSS[1] 2       | 1.594  | 7.60E-05 | 0.002     | 0 | 42.5  | 14 | 116 | 4 | 107  | 1.14  |
| 2201.893 | 9  | P17275        | R.SRDATPPVSP SRDAT[181.014] 2      | 0.731  | 6.20E-04 | 1.00E-04  | 1 | 35.86 | 16 | 64  | 3 | 347  | 0.06  |
| 1958.76  | 7  | P17275        | R.DATPPVSPINI DAT[181.014]P 2      | 0.461  | 0.001    | -0.002    | 0 | 33.16 | 16 | 64  | 3 | 347  | -1.14 |
| 2201.893 | 16 | P17275        | R.SRDATPPVSP S[166.9984]RD. 3      | 0.477  | 0.011    | 0.002     | 1 | 23.12 | 16 | 66  | 3 | 347  | 0.74  |
| 2121.927 | 11 | P17275        | R.SRDATPPVSP S[166.9984]RD. 3      | 1.317  | 7.30E-04 | 0.003     | 1 | 36.21 | 17 | 85  | 3 | 347  | 1.2   |
| 1536.637 | 7  | P17706        | K.EDLSPAFDHSI EDLSPAFDHS[1] 2      | 0.062  | 0.003    | 0.002     | 0 | 30.15 | 17 | 30  | 1 | 415  | 0.97  |
| 1536.637 | 11 | P17706        | K.EDLSPAFDHSI EDLS[166.998] 2      | 1.238  | 2.00E-04 | 0.002     | 0 | 41.96 | 17 | 42  | 2 | 415  | 0.97  |
| 1516.641 | 7  | P17812        | R.SGSSSPDSEIT SGSS[166.998] 2      | 1.082  | 2.40E-04 | 0.002     | 0 | 39.37 | 16 | 39  | 1 | 591  | 1.38  |
| 847.396  | 6  | P17844        | R.GYSSLLK.R GYSS[166.9984] 2       | -1.158 | 0.049    | 0.001     | 0 | 18.97 | 18 | 19  | 4 | 614  | 1.32  |
| 1651.638 | 15 | P17987        | K.HGSYEDAVHS HGSYEDAVHS[1] 2       | 0.566  | 8.60E-04 | 8.00E-04  | 0 | 35.21 | 17 | 46  | 2 | 556  | 0.48  |
| 1571.672 | 10 | P17987        | K.HGSYEDAVHS HGSYEDAVHS 3          | 1.291  | 6.50E-04 | 8.00E-04  | 0 | 38.13 | 19 | 83  | 2 | 556  | 0.52  |
| 2302.006 | 6  | P18031        | K.GSPLNAAPYG GS[166.9984]P 2       | -0.363 | 0.007    | 0.002     | 0 | 26.92 | 18 | 53  | 4 | 435  | 0.79  |
| 866.45   | 6  | P18085        | K.LGLQSLR.N LGLQS[166.998] 2       | 0.123  | 0.002    | 8.00E-04  | 0 | 33.78 | 20 | 34  | 1 | 180  | 0.9   |
| 2115.98  | 12 | P18124        | K.TTHFVEGGD TTHFVEGGDAG 4          | 1.184  | 0.002    | 0.002     | 1 | 34.32 | 20 | 34  | 2 | 248  | 0.79  |
| 1550.648 | 18 | P18206        | R.DPSASPGDAC DPSAS[166.998] 2      | 2.159  | 1.30E-05 | 0.002     | 0 | 52.3  | 16 | 52  | 3 | 1134 | 1.27  |
| 1255.582 | 8  | P18206        | K.SLLDASEAIK S[166.9984]LD 2       | 0.007  | 0.003    | 0.002     | 0 | 31.62 | 19 | 77  | 4 | 1134 | 1.68  |
| 1871.77  | 12 | P18583        | K.SHDDGNIDLE SHDDGNIDLES 3         | 0.054  | 0.005    | 0.002     | 0 | 26.86 | 16 | 190 | 7 | 2426 | 1.24  |
| 2425.005 | 11 | P18583        | K.EMEHTVCA EMEHTVC[16] 3           | 1.291  | 1.30E-05 | 0.003     | 0 | 55.49 | 19 | 190 | 7 | 2426 | 1.15  |
| 1452.698 | 8  | P18583        | K.ESDQTLAALL ESDQTLAALLS[1] 2      | 2.159  | 1.00E-06 | 0.003     | 0 | 66.66 | 19 | 190 | 7 | 2426 | 1.97  |
| 2425.005 | 12 | P18583        | K.EMEHTVCA EMEHTVC[16] 2           | 1.849  | 4.20E-05 | 0.004     | 0 | 50.04 | 19 | 124 | 6 | 2426 | 1.77  |
| 1397.613 | 8  | P18583        | R.SAASPVVSSV SAAS[166.9984] 2      | 0.269  | 0.002    | 0.002     | 0 | 32.24 | 17 | 124 | 6 | 2426 | 1.48  |
| 1871.77  | 16 | P18583        | K.SHDDGNIDLE SHDDGNIDLES 3         | 1.342  | 6.90E-04 | 0.002     | 0 | 35.14 | 16 | 149 | 6 | 2426 | 1.24  |
| 1986.873 | 13 | P18615        | R.SLSEQPMVDI S[166.9984]SE 2       | 2.119  | 1.90E-07 | 0.001     | 0 | 73.4  | 19 | 166 | 5 | 380  | 0.53  |
| 1502.601 | 10 | P18615        | R.SISADDLQEI S[166.9984]A 2        | 2.159  | 1.30E-07 | 0.002     | 0 | 71.88 | 15 | 206 | 5 | 380  | 1.06  |
| 917.34   | 6  | P18615        | R.SDSFPER.R SDS[166.9984] 2        | -0.833 | 0.019    | 5.00E-04  | 0 | 17.2  | 13 | 186 | 6 | 380  | 0.5   |
| 1456.599 | 7  | P18615        | K.SLYESVSSD S[166.9984]VE 2        | -0.657 | 0.013    | 0.003     | 0 | 23.98 | 18 | 166 | 5 | 380  | 1.88  |
| 1986.873 | 12 | P18615        | R.SLSEQPMVDI S[166.9984]E 2        | 2.127  | 6.10E-07 | 0.001     | 0 | 68.29 | 19 | 130 | 4 | 380  | 0.53  |
| 1986.873 | 16 | P18615        | R.SLSEQPMVDI SLSEQPMVDI[1] 3       | 0.751  | 0.005    | 0.003     | 0 | 28.85 | 19 | 145 | 4 | 380  | 1.53  |
| 1461.615 | 14 | P18827        | K.KDEGSYLEEF KDEGS[166.998] 2      | 0.062  | 0.003    | 0.002     | 1 | 31.17 | 18 | 38  | 2 | 310  | 1.2   |
| 1333.52  | 6  | P18827        | K.DEGSYSLPEP DEGSYS[166.99] 2      | -0.436 | 0.009    | 0.002     | 0 | 24.19 | 16 | 40  | 2 | 310  | 1.28  |



|          |    |              |                                  |        |          |           |   |       |    |     |   |       |       |
|----------|----|--------------|----------------------------------|--------|----------|-----------|---|-------|----|-----|---|-------|-------|
| 2616.124 | 8  | P20020       | R.IEDSEPHILID IEDS[166.9984] 3   | 0.91   | 0.004    | 0.003     | 0 | 29.42 | 18 | 40  | 3 | 1258  | 1.25  |
| 2616.124 | 26 | P20020       | R.IEDSEPHILID IEDSEPHILID 3      | 1.342  | 4.70E-04 | 0.003     | 0 | 38.63 | 18 | 48  | 3 | 1258  | 1.25  |
| 1756.766 | 10 | P20042       | K.DASDDLDLDDIN DASDDLDLDFI 2     | 2.159  | 2.60E-07 | 0.002     | 0 | 71.65 | 18 | 72  | 2 | 333   | 0.94  |
| 1315.616 | 5  | P20042       | R.DYTYEELLNR.DYTYEELLNR 2        | -0.538 | 0.01     | 0.002     | 0 | 26.17 | 19 | 26  | 1 | 333   | 1.65  |
| 1234.583 | 7  | P20700       | R.AGGPTTPLSP AGGPTT[181.0] 2     | -1.087 | 0.003    | 0.001     | 0 | 21.68 | 20 | 47  | 5 | 586   | 0.94  |
| 1314.549 | 7  | P20700       | R.AGGPTTPLSP AGGPTT[181.0] 2     | -0.699 | 0.016    | 0.002     | 0 | 23.56 | 18 | 52  | 6 | 586   | 1.55  |
| 1234.583 | 8  | P20700       | R.AGGPTTPLSP AGGPTT[16] 2        | -0.843 | 0.022    | 0.001     | 0 | 24.12 | 20 | 24  | 5 | 586   | 0.85  |
| 1234.583 | 6  | P20700       | R.AGGPTTPLSP AGGPTT[181.0] 2     | -0.425 | 0.008    | 0.001     | 0 | 28.28 | 20 | 28  | 5 | 586   | 0.94  |
| 1334.597 | 8  | P20700       | K.NQNSWGTGFI NQNSWGTGED 2        | -0.299 | 0.007    | -1.00E-04 | 0 | 27.56 | 18 | 44  | 7 | 586   | -0.1  |
| 1231.548 | 5  | P20700,Q0325 | R.LKLSPSFSR.V.LKLS[166.9984] 2   | -0.756 | 0.02     | 0.002     | 1 | 22.99 | 18 | 44  | 2 | 708   | 1.46  |
| 3357.431 | 19 | P20810       | K.KPADDQDPID KPADDQDPIDA 3       | 0.373  | 0.015    | 0.003     | 0 | 23.05 | 17 | 23  | 2 | 708   | 0.92  |
| 3277.465 | 12 | P20810       | K.KPADDQDPID KPADDQDPIDA 3       | 1.342  | 4.90E-07 | 0.004     | 0 | 67.69 | 17 | 95  | 3 | 708   | 1.11  |
| 1513.647 | 18 | P21291       | K.GFGFGQAG GFGFGQAGA 2           | 0.914  | 3.60E-04 | 0.002     | 0 | 40.69 | 19 | 41  | 1 | 193   | 1.62  |
| 1509.685 | 10 | P21333       | K.AFGPGLQGG.AFGPGLQGSA 2         | 2.172  | 1.00E-05 | 0.002     | 0 | 54.9  | 18 | 106 | 7 | 2647  | 1.67  |
| 1297.543 | 6  | P21333       | K.CSGPGLSPGV.C[160.0307]SG 2     | 2.159  | 1.30E-05 | 0.002     | 0 | 53.64 | 17 | 111 | 7 | 2647  | 1.72  |
| 1197.528 | 6  | P21333       | R.DAQQDFHPDI DAQQDFHPDR 3        | -0.071 | 0.038    | 2.00E-04  | 0 | 20.64 | 19 | 84  | 6 | 2647  | 0.14  |
| 1044.5   | 7  | P21333,O7536 | K.DLAEDAPWK.DLAEDAPWK 2          | 0.497  | 0.001    | 0.001     | 0 | 35.52 | 18 | 98  | 8 | 993   | 0.93  |
| 1242.54  | 6  | P21359       | K.SFDHLSIDTK.S[166.9984]FDI 2    | 0.094  | 0.003    | 0.001     | 0 | 31.49 | 18 | 32  | 7 | 2839  | 1.12  |
| 2034.917 | 6  | P21359       | K.GSEGLAATY.GSEGLAATYP 2         | -1.028 | 0.035    | 9.00E-04  | 0 | 21.3  | 19 | 37  | 7 | 2839  | 0.43  |
| 2034.917 | 7  | P21359       | K.GSEGLAATY.GSEGLAATYP 2         | -0.636 | 0.014    | 9.00E-04  | 0 | 25.17 | 19 | 37  | 8 | 2839  | 0.43  |
| 1674.686 | 16 | P21359       | K.SMSLDMGQP.SMS[166.9984] 2      | 0.179  | 0.002    | 0.002     | 0 | 30.32 | 16 | 46  | 6 | 2839  | 0.91  |
| 1441.672 | 9  | P21709       | R.LPGLSGSDGIP.LPGLSGS[166.9] 2   | -0.677 | 0.016    | 0.001     | 0 | 24.78 | 19 | 25  | 2 | 976   | 0.99  |
| 1480.636 | 8  | P21796       | K.LTFDSSFSPT.LTFDSSFS[166.9] 2   | 2.159  | 1.40E-05 | 0.003     | 0 | 53.25 | 17 | 53  | 1 | 283   | 1.84  |
| 1380.593 | 10 | P21860       | R.GESIEPLDPE.GES[166.9984] 2     | -0.959 | 0.028    | 8.00E-04  | 0 | 19.94 | 17 | 20  | 1 | 1342  | 0.58  |
| 2136.816 | 17 | P22059       | K.MLAESDESG.MLAESDES[166] 2      | 2.119  | 1.50E-07 | 6.00E-04  | 0 | 71.25 | 16 | 85  | 2 | 807   | 0.27  |
| 1085.513 | 6  | P22059       | R.SLSELESK.L.SL[166.9984]E 2     | 0.667  | 6.20E-04 | 0.001     | 0 | 36.22 | 17 | 154 | 3 | 807   | 1.33  |
| 2216.782 | 11 | P22059       | K.MLAESDESG.MLAES[166.99] 2      | 0.873  | 4.10E-04 | 4.00E-04  | 0 | 34.28 | 13 | 94  | 4 | 807   | 0.16  |
| 2136.816 | 7  | P22059       | K.MLAESDESG.MLAES[166.99] 2      | -0.574 | 0.011    | 0.002     | 0 | 22.79 | 16 | 134 | 5 | 807   | 0.88  |
| 2043.925 | 9  | P22234       | K.DDANNDPOV.DDANNDPOVS 2         | 2.159  | 2.40E-07 | 6.00E-04  | 0 | 72.39 | 19 | 103 | 4 | 425   | 0.31  |
| 1329.597 | 6  | P22234       | K.EVYELDSPG.EVYELDS[166.9] 2     | 1.087  | 2.90E-04 | 0.002     | 0 | 39.42 | 16 | 103 | 4 | 425   | 1.83  |
| 984.467  | 6  | P22314       | R.DEFELFK.Q.DEFELFK 2            | -0.955 | 0.027    | 0.001     | 0 | 19.98 | 17 | 20  | 2 | 1058  | 1.24  |
| 1525.677 | 7  | P22314       | K.NGSEADIDEG.NGSEADIDEG 2        | 0.739  | 6.20E-04 | -0.001    | 0 | 36.94 | 17 | 37  | 2 | 1058  | -0.84 |
| 1445.669 | 13 | P22314       | K.DNPGVVTCL.DNPGVVTCL[16] 2      | 1.469  | 1.10E-04 | 0.002     | 0 | 46.22 | 19 | 50  | 2 | 1058  | 1.5   |
| 1093.41  | 6  | P22626       | R.GGNFGGDS.GGNFGGDS[1] 2         | 0.469  | 9.70E-04 | 0.001     | 0 | 33.24 | 16 | 41  | 4 | 353   | 1.12  |
| 1087.484 | 10 | P22626       | R.NYEQWGWK.NYEQWGWK 2            | -0.914 | 0.024    | 0.001     | 0 | 19.41 | 16 | 44  | 4 | 353   | 1.28  |
| 2575.006 | 27 | P22626       | R.GFGDGYNGY.GFGDGYNGY 3          | 0.303  | 0.015    | 0.003     | 0 | 23.39 | 18 | 33  | 5 | 353   | 1.19  |
| 1050.441 | 5  | P22626       | R.DYFEYK.K.DYFEYK 2              | -0.888 | 0.023    | 0.001     | 0 | 18.65 | 15 | 44  | 3 | 353   | 1     |
| 1479.647 | 8  | P23193       | K.EPAITSQNSP.EPAITSQNS[16] 2     | -0.466 | 0.01     | 0.002     | 0 | 25.89 | 18 | 36  | 3 | 301   | 1.16  |
| 1607.742 | 12 | P23193       | K.EPAITSQNSP.EPAITSQNS[1] 3      | 0.713  | 0.006    | 0.001     | 1 | 28.45 | 19 | 36  | 3 | 301   | 0.72  |
| 1439.647 | 12 | P23381       | R.DMNQVLDAY.DMNQVLDAYE 2         | 1.364  | 1.50E-04 | 0.002     | 0 | 44.17 | 18 | 44  | 3 | 471   | 1.4   |
| 964.418  | 6  | P23381       | R.KLSDFDQ.-KLS[166.9984]F 2      | 0.162  | 0.002    | 0.001     | 1 | 31.16 | 17 | 31  | 2 | 471   | 1.17  |
| 1550.735 | 11 | P23396       | K.DIELPTPISEC.DIELPTPISEC 2      | 1.03   | 2.90E-04 | 0.003     | 0 | 40.85 | 18 | 50  | 2 | 243   | 1.77  |
| 1470.769 | 9  | P23396       | K.DIELPTPISEC.DIELPTPISEC 2      | 0.51   | 0.001    | 0.003     | 0 | 33.65 | 16 | 66  | 2 | 243   | 1.79  |
| 1550.735 | 9  | P23396       | K.DIELPTPISEC.DIELPTPISEC 2      | 1.483  | 1.00E-04 | 0.003     | 0 | 45.38 | 18 | 64  | 2 | 243   | 1.79  |
| 1888.738 | 11 | P23497       | K.DDLSGQQT.DDLSGQQT[166.99] 2    | 0.849  | 4.00E-04 | 0.001     | 0 | 42.04 | 21 | 61  | 9 | 879   | 0.76  |
| 1852.796 | 6  | P23497       | K.LPLQSEEEER.LPLQSE[166.99] 2    | -0.079 | 0.004    | 0.002     | 1 | 28.76 | 17 | 63  | 9 | 879   | 1.31  |
| 1194.555 | 5  | P23497       | K.LSTFRFSK.K.LSTFRFS[166.9] 2    | -0.126 | 0.004    | 0.001     | 1 | 29.29 | 18 | 63  | 9 | 879   | 1.05  |
| 1993.839 | 10 | P23497       | R.SEPVINDNP.SEPVINDNP 2          | 1.51   | 8.90E-05 | 0.002     | 0 | 45.63 | 18 | 129 | 9 | 879   | 0.96  |
| 1888.738 | 12 | P23497       | K.DDLSGQQT.DDLSGQQT[166.99] 2    | 2.322  | 1.10E-05 | 0.001     | 0 | 57.6  | 21 | 128 | 7 | 879   | 0.76  |
| 2763.175 | 13 | P23511       | K.EKDSPHMQD.EKDS[166.9984] 3     | 0.209  | 0.021    | -1.00E-04 | 1 | 21.41 | 17 | 39  | 2 | 347   | -0.05 |
| 2506.037 | 15 | P23511       | K.DSPHMQDPN.DSPHMQDPN[16] 3      | 0.051  | 0.027    | 0.003     | 0 | 20.87 | 18 | 21  | 2 | 347   | 1.12  |
| 1182.577 | 5  | P23528       | M.ASGVAVSDG.ASGVAVSDG 2          | -0.409 | 0.008    | 9.00E-04  | 0 | 28.46 | 20 | 28  | 4 | 166   | 0.76  |
| 1519.685 | 10 | P23528       | K.HELOANCYEE.HELOANC[160.] 2     | -0.314 | 0.007    | 0.002     | 0 | 27.39 | 18 | 33  | 5 | 166   | 0.96  |
| 915.515  | 9  | P23528       | K.NILEEGK.E.NILEEGK 2            | -1.095 | 0.04     | 6.00E-04  | 0 | 19.58 | 18 | 33  | 5 | 166   | 0.61  |
| 837.329  | 5  | P23588       | R.AFGSGYR.R.AFGSGYR 2            | -0.821 | 0.018    | 5.00E-04  | 0 | 17.34 | 13 | 112 | 8 | 611   | 1.03  |
| 2155.786 | 20 | P23588       | K.YAALVSDGDE.YAALVSDG 2          | 2.159  | 5.90E-07 | 0.002     | 0 | 64.02 | 14 | 150 | 8 | 611   | 1.03  |
| 1127.498 | 9  | P23588       | K.SLENELNK.E.S[166.9984]LEN 2    | 1.17   | 2.20E-04 | 0.002     | 0 | 43.25 | 19 | 112 | 8 | 611   | 1.54  |
| 1687.711 | 7  | P23588       | R.ARPATDSFDC.ARPATDS[166.9] 2    | 0.461  | 9.80E-04 | 0.002     | 0 | 36.16 | 19 | 150 | 8 | 611   | 1.2   |
| 2270.016 | 7  | P23588       | K.EEDCHSPYSKI.EEDC[160.0307] 2   | -0.785 | 0.021    | 9.00E-04  | 0 | 23.69 | 19 | 148 | 9 | 611   | 0.41  |
| 2270.016 | 7  | P23588       | K.EEDCHSPYSKI.EEDC[160.0307] 2   | -0.832 | 0.023    | 9.00E-04  | 0 | 23.21 | 19 | 123 | 9 | 611   | 0.41  |
| 837.329  | 5  | P23588       | R.AFGSGYR.R.AFGSGYR[243.0] 2     | -1.009 | 0.029    | 7.00E-04  | 0 | 15.44 | 13 | 143 | 9 | 611   | 0.86  |
| 2352.84  | 10 | P24534       | K.DDDDDIFGSI.DDDDDIFGSI[1] 2     | 2.119  | 1.10E-05 | 0.002     | 0 | 52.07 | 15 | 192 | 6 | 225   | 1     |
| 1850.733 | 15 | P24534       | K.YGPADVEDTI.YGPADVEDTIG 2       | 2.159  | 4.70E-09 | 0.001     | 0 | 86.51 | 16 | 213 | 4 | 225   | 0.55  |
| 1770.766 | 15 | P24534       | K.YGPADVEDTI.YGPADVEDTIG 2       | 2.043  | 2.80E-05 | -2.00E-04 | 0 | 49.96 | 17 | 291 | 7 | 225   | -0.09 |
| 1946.662 | 15 | P24534,P2969 | K.LIQIQVVEDD.LIQIQ[160.030] 2    | 2.159  | 1.40E-06 | 7.00E-04  | 0 | 63.88 | 18 | 213 | 3 | 0.49  | 0.64  |
| 1942.846 | 18 | P24821       | K.LPVGSCQSV.D.LPVGSCQSV[160.] 2  | -0.639 | 0.015    | 0.004     | 0 | 24.16 | 18 | 24  | 1 | 2201  | 0.49  |
| 1606.704 | 8  | P24928       | K.YSPSTPYSP.YS[166.9984]P 2      | -0.191 | 0.005    | 0.004     | 0 | 27.64 | 17 | 28  | 3 | 1970  | 2.4   |
| 1606.704 | 7  | P24928       | K.YSPSTPYSP.YS[166.998] 2        | 0.165  | 0.002    | 0.004     | 0 | 31.19 | 17 | 52  | 3 | 1970  | 2.4   |
| 1686.67  | 9  | P24928       | K.YSPSTPYSP.Y[243.0297]SP 2      | 0.083  | 0.002    | 0.001     | 0 | 29.41 | 16 | 36  | 6 | 1970  | 0.79  |
| 1672.654 | 9  | P24928,P2492 | K.YSPSTPYSP.Y[243.0297]SP 2      | -1.217 | 0.046    | 0.002     | 0 | 18.38 | 18 | 25  | 2 | 125   | 1.25  |
| 1592.688 | 10 | P24928,P2492 | K.YSPSTPYSP.YSPSTPYSP[2] 2       | 0.686  | 6.00E-04 | 0.001     | 0 | 38.4  | 19 | 52  | 6 | 1970  | 0.76  |
| 1672.654 | 9  | P24928,P2492 | K.YSPSTPYSP.YSPSTPYSP[166.998] 2 | -1.093 | 0.035    | 0.002     | 0 | 19.6  | 18 | 29  | 1 | 125   | 1.25  |
| 1592.688 | 9  | P24928,P2492 | K.YSPSTPYSP.YSPSTPYSP[1] 2       | -0.345 | 0.007    | 0.001     | 0 | 28.08 | 19 | 29  | 2 | 125   | 0.76  |
| 1672.654 | 10 | P24928,P2492 | K.YSPSTPYSP.Y[243.0297]SP 2      | -0.138 | 0.004    | 0.002     | 0 | 29.17 | 18 | 29  | 1 | 125   | 1.25  |
| 1592.688 | 10 | P24928,P2492 | K.YSPSTPYSP.YSPSTPYSP[181.0] 2   | 1.124  | 2.50E-04 | -0.003    | 0 | 41.77 | 18 | 62  | 3 | -1.81 | 1.18  |
| 1430.641 | 6  | P25054       | R.QASSDSISL.QASS[166.9984] 2     | 0.138  | 0.002    | 0.002     | 0 | 32.91 | 19 | 33  | 3 | 2843  | 1.18  |
| 1557.767 | 13 | P25054       | R.SKTPPPPQT.SKT[181.014]P 3      | 0.019  | 0.031    | 0.002     | 1 | 21.54 | 19 | 22  | 3 | 2843  | 1.18  |
| 1430.641 | 9  | P25054       | R.QASSDSISL.QAS[166.9984] 2      | 1.193  | 1.90E-04 | 0.002     | 0 | 43.46 | 19 | 55  | 4 | 2843  | 1.39  |
| 1635.543 | 5  | P25205       | R.SEDESETEI.SEDES[166.998] 2     | -0.782 | 0.017    | 0.003     | 0 | 17.73 | 13 | 18  | 2 | 808   | 1.98  |
| 1042.509 | 5  | P25398       | K.DVIEEYFK.C.DVIEEYFK 2          | -0.748 | 0.017    | 0.001     | 0 | 21.07 | 16 | 21  | 1 | 132   | 1.12  |
| 1427.569 | 7  | P25490       | R.EEVGGDDSI.EEVGGDDSI[1] 2       | 0.653  | 6.70E-04 | 3.00E-04  | 0 | 36.07 | 17 | 36  | 1 | 414   | 0.2   |
| 1778.809 | 7  | P25786       | R.NQYDNDVT.NQYDNDVTVM 2          | -0.381 | 0.008    | 0.002     | 0 | 26.72 | 18 | 27  | 1 | 263   | 1.2   |
| 1278.335 | 4  | P25786       | K.EEDESDDNN.EEDES[166.998] 2     | -1.088 | 0.034    | 0.002     | 0 | 14.67 | 13 | 15  | 1 | 255   | 1.85  |
| 1222.572 | 5  | P26045       | R.SLSVEHLETK.SLS[166.9984]V 2    | -1.126 | 0.043    | 0.001     | 0 | 19.29 | 18 | 19  | 4 | 913   | 1.08  |
| 1769.734 | 13 | P26045       | K.GSLAPQSDSI.GSLAPQSDSI[166] 2   | -0.917 | 0.024    | 0.002     | 0 | 21.41 | 18 | 24  | 3 | 913   | 1.15  |
| 1769.734 | 6  | P26045       | K.GSLAPQSDSI.GSLAPQSDSI[1] 2     | -0.408 | 0.007    | 0.002     | 0 | 26.48 | 18 | 26  | 2 | 913   | 1.15  |
| 2224.847 | 12 | P26358       | K.EADDEEVDI.EADDEEVDI 2          | 0.674  | 6.70E-04 | 0.002     | 0 | 35.29 | 16 | 98  | 6 | 1616  | 1.03  |
| 2352.942 | 11 |              |                                  |        |          |           |   |       |    |     |   |       |       |

|          |    |               |                                  |        |          |          |   |        |    |     |    |      |       |
|----------|----|---------------|----------------------------------|--------|----------|----------|---|--------|----|-----|----|------|-------|
| 1642.721 | 7  | P27816        | R.EAQTLDLSQIQ EAQTLDLSQIQET 2    | -0.549 | 0.012    | 7.00E-04 | 0 | 24.06  | 17 | 88  | 9  | 1152 | 0.41  |
| 1210.572 | 7  | P27816        | R.LATNTSAPDL LATNTS[166.99] 2    | 1.849  | 4.50E-05 | 0.001    | 0 | 50.03  | 19 | 151 | 8  | 1152 | 0.92  |
| 1932.698 | 13 | P27824        | K.SDAEEDGGT\ SDAEEDGGT[1] 2      | 0.51   | 8.80E-04 | 0.002    | 0 | 33.65  | 16 | 351 | 20 | 592  | 0.87  |
| 1932.698 | 13 | P27824        | K.SDAEEDGGT\ S[166.9984]DA 2     | 2.172  | 1.90E-10 | 0.001    | 0 | 100.39 | 16 | 364 | 19 | 592  | 0.61  |
| 2012.664 | 12 | P27824        | K.SDAEEDGGT\ S[166.9984]DA 2     | 2.119  | 6.80E-06 | 0.001    | 0 | 52.11  | 13 | 272 | 20 | 592  | 0.62  |
| 2285.94  | 13 | P27824        | K.SDAEEDGGT\ S[166.9984]DA 3     | 1.291  | 2.50E-04 | 0.003    | 1 | 40.93  | 17 | 351 | 20 | 592  | 1.44  |
| 2188.851 | 10 | P27824        | K.QKSDAEEDGG\ QKS[166.9984] 3    | 0.612  | 0.009    | 0.003    | 1 | 24.46  | 16 | 272 | 20 | 592  | 1.39  |
| 1299.633 | 9  | P27824        | R.KPDEWDERP\ KPDEWDERP 3         | 0.426  | 0.012    | 1.00E-04 | 0 | 25.58  | 19 | 351 | 20 | 592  | 0.1   |
| 2285.94  | 21 | P27824        | K.SDAEEDGGT\ SDAEEDGGTVS 2       | 0.325  | 0.002    | 0.004    | 1 | 32.8   | 17 | 351 | 20 | 592  | 1.53  |
| 2365.907 | 9  | P27824        | K.SDAEEDGGT\ S[166.9984]DA 2     | -0.795 | 0.018    | -0.001   | 1 | 19.6   | 15 | 351 | 20 | 592  | -0.48 |
| 1508.674 | 7  | P27824        | K.AEEDILNRSF AEEDILNRS[1] 3      | 1.291  | 0.002    | 0.004    | 1 | 32.36  | 17 | 351 | 20 | 592  | 2.57  |
| 2285.94  | 6  | P27824        | K.SDAEEDGGT\ SDAEEDGGT[1] 3      | 0.396  | 0.015    | 0.002    | 1 | 23.28  | 17 | 351 | 20 | 592  | 0.92  |
| 2268.818 | 12 | P27824        | K.QKSDAEEDGG\ QKS[166.9984] 3    | 0.064  | 0.029    | 0.002    | 1 | 18     | 15 | 342 | 18 | 592  | 0.93  |
| 1932.698 | 19 | P27824        | K.SDAEEDGGT\ SDAEEDGGTVS 2       | 2.024  | 2.20E-06 | 0.002    | 0 | 59.79  | 16 | 331 | 17 | 592  | 0.87  |
| 2107.982 | 20 | P27824        | K.IPDPEAVKPD\ IPDPEAVKPDV 3      | 0.807  | 0.006    | 0.002    | 0 | 28.42  | 18 | 318 | 17 | 592  | 1.07  |
| 1428.708 | 5  | P27824        | K.AEEDILNRSF AEEDILNRSR 3        | 0.263  | 0.02     | 9.00E-04 | 1 | 20.97  | 16 | 364 | 19 | 592  | 0.63  |
| 1511.706 | 9  | P28066        | R.ITSLMPEPSII ITS[166.9984]P 2   | 1.129  | 2.50E-04 | 0.003    | 0 | 41.84  | 18 | 42  | 1  | 241  | 1.75  |
| 814.332  | 4  | P28290        | R.MPSFR.F 5 MPS[166.9984] 2      | -0.97  | 0.03     | 0.001    | 0 | 21.85  | 19 | 29  | 3  | 1259 | 1.2   |
| 898.428  | 6  | P28290        | K.SLASIAEK.S SLAS[166.9984] 2    | -1.115 | 0.036    | 5.00E-04 | 0 | 22.38  | 21 | 22  | 3  | 1259 | 0.56  |
| 2223.971 | 10 | P28482        | R.VADPDHDT\ VADPDHDTGf 3         | 1.291  | 7.20E-05 | 0.003    | 0 | 47.31  | 17 | 47  | 1  | 360  | 1.41  |
| 1463.653 | 8  | P28715        | R.NAPAAVDEG\ NAPAAVDEGS[ 2       | -1.771 | 5.40E-05 | 9.00E-04 | 0 | 48.26  | 18 | 59  | 2  | 1186 | 0.63  |
| 1671.729 | 9  | P28715        | R.ELTPASPTCT\ ELTPAS[166.99] 2   | 0.72   | 2.004    | 0.002    | 0 | 29.55  | 19 | 59  | 2  | 1186 | 1.36  |
| 1588.719 | 8  | P28749        | R.DMQPLSPISV\ DMQPLS[166.9] 2    | 2.109  | 2.40E-05 | 0.002    | 0 | 53.03  | 19 | 53  | 2  | 1068 | 1.51  |
| 1413.641 | 7  | P29317        | R.LPSTSGSEGV\ LPSTSGS[166.9] 2   | 0.418  | 0.001    | 0.002    | 0 | 34.73  | 18 | 140 | 7  | 976  | 1.35  |
| 2069.922 | 13 | P29317        | K.TYVDPHYED\ TYVDPH[181.] 2      | -1.184 | 0.048    | 0.002    | 0 | 18.71  | 18 | 140 | 7  | 976  | 0.84  |
| 1506.662 | 8  | P29317        | R.ARQSPEDVYF\ ARQS[166.9984] 2   | 0.586  | 7.40E-04 | 0.003    | 1 | 36.41  | 18 | 113 | 7  | 976  | 1.71  |
| 1762.742 | 12 | P29317        | R.VLEDDPEATY\ VLEDDPEATY[2] 2    | 2.159  | 9.20E-07 | 0.003    | 0 | 67.2   | 19 | 140 | 7  | 976  | 1.54  |
| 1413.641 | 7  | P29317        | R.LPSTSGSEGV\ LPS[166.9984]T 2   | 1.376  | 1.40E-04 | 0.001    | 0 | 44.31  | 18 | 140 | 7  | 976  | 0.72  |
| 1413.641 | 10 | P29317        | R.LPSTSGSEGV\ LPST[166.9984] 2   | 0.854  | 4.70E-04 | 0.002    | 0 | 39.07  | 18 | 130 | 6  | 976  | 1.35  |
| 1762.742 | 10 | P29317        | R.VLEDDPEATY\ VLEDDPEAT[18] 2    | 2.025  | 5.90E-07 | 0.003    | 0 | 69.14  | 19 | 136 | 7  | 976  | 1.54  |
| 1762.742 | 8  | P29317        | R.VLEDDPEATY\ VLEDDPEATY[ 2      | 2.084  | 6.80E-07 | 0.003    | 0 | 68.51  | 19 | 114 | 5  | 976  | 1.54  |
| 1279.524 | 8  | P29317        | R.QSPEDVYFK\ QSPEDVY[243.] 2     | -0.657 | 0.014    | 0.002    | 0 | 22.97  | 17 | 146 | 7  | 976  | 1.24  |
| 1762.742 | 10 | P29317        | R.VLEDDPEATY\ VLEDDPEATY[ 2      | -0.822 | 0.022    | 0.002    | 0 | 23.31  | 19 | 129 | 8  | 976  | 1.2   |
| 1996.842 | 11 | P29323        | R.FLEDDSDPT\ FLEDDTS[166.9] 2    | 2.025  | 1.90E-07 | 0.001    | 0 | 73.26  | 18 | 73  | 1  | 1055 | 0.64  |
| 1975.868 | 18 | P29353        | R.ELFDDPSYV\ ELFDDPS[166.9] 2    | 1.372  | 1.30E-04 | 0.003    | 0 | 43.27  | 17 | 43  | 3  | 583  | 1.43  |
| 1975.868 | 9  | P29353        | R.ELFDDPSYV\ ELFDDPSY[243.] 2    | 1.473  | 1.00E-04 | 0.003    | 0 | 44.28  | 17 | 64  | 4  | 583  | 1.43  |
| 1879.849 | 18 | P29373        | K.VGEEFEETQV\ VGEFEETQV[ 3       | 1.291  | 0.001    | 6.00E-04 | 0 | 35.68  | 19 | 36  | 2  | 138  | 0.33  |
| 1038.487 | 9  | P29374        | K.ILGQSSPEK.K ILGQSS[166.99] 2   | -1.041 | 0.037    | 1.00E-04 | 0 | 19.12  | 17 | 19  | 2  | 1257 | 0.1   |
| 2122.954 | 19 | P29375        | K.VPEVLSTDT\ VPEVLSTDTQT 2       | -0.429 | 0.008    | 0.001    | 0 | 26.26  | 18 | 26  | 2  | 1690 | 0.47  |
| 2122.954 | 12 | P29375        | K.VPEVLSTDT\ VPEVLSTDTQT 2       | -0.544 | 0.01     | 0.001    | 0 | 25.1   | 18 | 25  | 2  | 1690 | 0.47  |
| 2733.251 | 13 | P29590        | R.SPVIGSEVFLP\ S[166.9984]PVI 3  | 0.045  | 0.028    | 0.003    | 0 | 21.77  | 19 | 25  | 7  | 882  | 1.19  |
| 1586.676 | 9  | P29590        | K.AVSPHLDGVP\ AVS[166.9984] 3    | 1.124  | 0.002    | 0.001    | 0 | 32.03  | 17 | 32  | 5  | 882  | 0.76  |
| 2909.197 | 11 | P29692        | K.KPATPAEDDE\ KPATPAEDDED 3      | 1.272  | 0.007    | 0.006    | 0 | 27.44  | 18 | 162 | 6  | 281  | 2.22  |
| 2989.163 | 20 | P29692        | K.KPATPAEDDE\ KPATPAEDDED 3      | 1.224  | 0.002    | 0.002    | 0 | 30.59  | 16 | 134 | 6  | 281  | 0.68  |
| 1503.677 | 12 | P29692        | R.ATAPQTHV\ ATAPQTHVS[ 3         | 0.621  | 0.008    | 0.003    | 0 | 26.33  | 18 | 162 | 6  | 281  | 1.74  |
| 1680.711 | 11 | P29966        | K.EEPAAGSGG\ EEPAAAGSGAA 2       | 1.189  | 7.50E-06 | 0.001    | 0 | 55.24  | 16 | 319 | 15 | 332  | 0.84  |
| 1580.648 | 8  | P29966        | K.AEDGATPSP\ AEDGATPSPS[1] 2     | 2.174  | 5.70E-05 | 4.00E-04 | 0 | 46.39  | 16 | 319 | 15 | 332  | 0.28  |
| 2995.269 | 20 | P29966        | K.EAPAEGEAA\ EAPAEGEAAEP 3       | 0.333  | 0.016    | 0.003    | 0 | 23.65  | 18 | 307 | 19 | 332  | 1.06  |
| 1580.648 | 6  | P29966        | K.AEDGATPSP\ AEDGATPSP[166] 2    | -0.485 | 0.009    | 0.002    | 0 | 24.7   | 17 | 307 | 19 | 332  | 1.48  |
| 2995.269 | 12 | P29966        | K.EAPAEGEAA\ EAPAEGEAAEP 3       | 0.345  | 0.016    | 0.003    | 0 | 23.77  | 18 | 307 | 19 | 332  | 1.06  |
| 1864.844 | 19 | P29966        | K.GEAAAERP\ GEAAAERPGEA 2        | 1.481  | 1.00E-04 | 0.002    | 0 | 46.36  | 19 | 307 | 19 | 332  | 1.28  |
| 2995.269 | 19 | P29966        | K.EAPAEGEAA\ EAPAEGEAAEP 3       | 0.814  | 0.005    | 0.004    | 0 | 28.46  | 18 | 307 | 19 | 332  | 1.22  |
| 1580.648 | 11 | P29966        | K.AEDGATPSP\ AEDGATPSPSN 2       | 1.729  | 6.50E-05 | 4.00E-04 | 0 | 45.84  | 16 | 307 | 19 | 332  | 0.28  |
| 2995.269 | 21 | P29966        | K.EAPAEGEAA\ EAPAEGEAAEP 3       | 0.669  | 0.008    | 0.004    | 0 | 27.01  | 18 | 307 | 19 | 332  | 1.39  |
| 1702.768 | 20 | P29966        | K.GEPAAAAPI\ GEPAAAAPEA 2        | 2.159  | 1.30E-07 | 0.002    | 0 | 75.08  | 19 | 307 | 19 | 332  | 1.1   |
| 1529.671 | 24 | P29966        | K.EAGEGGEAE\ EAGEGGEAEAF 2       | 0.556  | 8.80E-04 | 0.004    | 0 | 36.11  | 18 | 307 | 19 | 332  | 2.43  |
| 1864.844 | 8  | P29966        | K.GEAAAERP\ GEAAAERPGEA 2        | 1.291  | 1.50E-04 | 0.004    | 0 | 44.8   | 19 | 307 | 19 | 332  | 1.87  |
| 3075.235 | 11 | P29966        | K.EAPAEGEAA\ EAPAEGEAAEP 3       | 0.113  | 0.023    | 0.003    | 0 | 21.45  | 18 | 307 | 19 | 332  | 0.96  |
| 1708.743 | 7  | P29966        | K.AEDGATPSP\ AEDGATPSPSN 2       | -0.034 | 0.003    | 0.002    | 1 | 31.21  | 19 | 307 | 19 | 332  | 1.39  |
| 1660.614 | 6  | P29966        | K.AEDGATPSP\ AEDGATPSP[166] 2    | -1.15  | 0.048    | 0.002    | 0 | 15.05  | 14 | 307 | 19 | 332  | 1.21  |
| 2995.269 | 8  | P29966        | K.EAPAEGEAA\ EAPAEGEAAEP 3       | 0.057  | 0.031    | 0.003    | 0 | 20.93  | 18 | 355 | 17 | 332  | 1.06  |
| 1864.844 | 14 | P29966        | K.GEAAAERP\ GEAAAERPGEA 2        | 2.024  | 2.50E-06 | 0.002    | 0 | 62.57  | 19 | 324 | 17 | 332  | 1.28  |
| 865.386  | 4  | P29966        | K.LSGFSFK.K LSGFS[166.998] 2     | 0.666  | 6.70E-04 | 0.001    | 0 | 36.24  | 17 | 231 | 16 | 332  | 1.34  |
| 1788.709 | 5  | P29966        | K.AEDGATPSP\ AEDGATPSP[166] 2    | -1.152 | 0.042    | 0.002    | 1 | 19.06  | 18 | 231 | 16 | 332  | 0.93  |
| 2995.269 | 21 | P29966        | K.EAPAEGEAA\ EAPAEGEAAEP 3       | 0.783  | 0.006    | 0.004    | 0 | 28.19  | 18 | 355 | 17 | 332  | 1.22  |
| 1788.709 | 6  | P29966        | K.AEDGATPSP\ AEDGATPSP[166] 2    | -0.956 | 0.028    | 0.003    | 1 | 20.98  | 18 | 355 | 17 | 332  | 1.54  |
| 2995.269 | 29 | P29966        | K.EAPAEGEAA\ EAPAEGEAAEP 3       | 1.1    | 0.003    | 0.003    | 0 | 31.36  | 18 | 355 | 17 | 332  | 1.06  |
| 764.349  | 4  | P29966,01452  | K.RFSFK.S RFS[166.9984]f 2       | -0.486 | 0.01     | 0.001    | 0 | 24.69  | 17 | 319 | 17 | 332  | 1.59  |
| 1608.754 | 8  | P30040        | R.DGDFENPVP\ DGDFENPVPY 2        | 1.712  | 5.50E-05 | 0.002    | 0 | 48.67  | 19 | 49  | 1  | 261  | 1.28  |
| 1829.884 | 11 | P30041        | K.DGDSVMVLP\ DGDSVMVLP[ 2        | 0.633  | 7.40E-04 | 0.003    | 0 | 36.88  | 18 | 70  | 2  | 224  | 1.53  |
| 1582.669 | 7  | P30041        | K.DINAYNEEP\ DINAYN[160.] 2      | 2.133  | 2.40E-05 | 0.002    | 0 | 50.88  | 17 | 70  | 2  | 224  | 1.43  |
| 1475.624 | 4  | P30041        | R.DFTPVCTEL\ DFT[181.014]P[ 2    | -1.174 | 0.046    | 0.002    | 0 | 17.81  | 17 | 69  | 3  | 224  | 0.99  |
| 961.512  | 11 | P30050        | K.IGLPLSPK.K IGLPLS[166.9] 2     | 0.216  | 0.002    | 0.001    | 0 | 34.71  | 20 | 35  | 3  | 165  | 1.05  |
| 2046.919 | 12 | P30050        | R.PHPHIDDINS\ PHPHIDDINS.G 3     | 1.2    | 0.002    | 0.002    | 0 | 31.36  | 17 | 48  | 2  | 165  | 0.81  |
| 1216.571 | 12 | P30085        | R.NQDNLQGW\ NQDNLQGW[ 2          | -0.167 | 0.004    | 0.001    | 0 | 29.88  | 19 | 30  | 1  | 196  | 0.82  |
| 1712.764 | 12 | P30086        | K.NRPTSIWDG\ NRPT[166.998] 2     | 1.592  | 8.00E-05 | 0.002    | 0 | 47.47  | 19 | 47  | 2  | 187  | 1.26  |
| 1712.764 | 8  | P30086        | K.NRPTSIWDG\ NRPT[181.014] 2     | 0.529  | 9.20E-04 | 0.002    | 0 | 36.84  | 19 | 37  | 1  | 187  | 1.26  |
| 1777.753 | 9  | P30305        | R.SVTPPEEQE\ S[166.9984]VTI 2    | 0.132  | 0.002    | 0.001    | 0 | 30.87  | 17 | 31  | 1  | 580  | 0.54  |
| 1777.753 | 5  | P30305        | R.SVTPPEEQE\ SVT[181.014]PI 2    | -0.371 | 0.008    | 0.001    | 0 | 25.82  | 17 | 26  | 1  | 580  | 0.54  |
| 1772.774 | 15 | P30414        | K.HDVTVSSDU\ HDVTVSS[166] 2      | 0.826  | 4.50E-04 | 0.004    | 0 | 38.81  | 18 | 56  | 6  | 1462 | 2.33  |
| 1252.557 | 7  | P30414        | K.VETESPLGNA\ VETS[166.998] 2    | 0.395  | 0.001    | 0.002    | 0 | 33.48  | 17 | 55  | 6  | 1462 | 1.2   |
| 1281.634 | 10 | P30414        | R.IIIPDSIESK.S IIPDS[166.9984] 2 | -1.233 | 0.048    | 0.002    | 0 | 19.2   | 19 | 45  | 6  | 1462 | 1.61  |
| 1772.774 | 15 | P30414        | K.HDVTVSSDU\ HDVTVSS[166.] 2     | 0.95   | 3.40E-04 | 0.004    | 0 | 40.04  | 18 | 71  | 7  | 1462 | 2.33  |
| 1167.504 | 12 | P30419        | R.GGLSPANDT\ GGLS[166.9984] 2    | 0.506  | 0.001    | 9.00E-04 | 0 | 31.61  | 17 | 35  | 1  | 496  | 0.73  |
| 2637.191 | 10 | P30443,P01891 | R.DGEDQTDQD\ DGEDQTDQTEL 3       | 1.291  | 2.40E-05 | 0.002    | 0 | 52.91  | 19 | 313 | 19 | 332  | 0.76  |
| 2556.092 | 20 | P30443,P0443E | R.KGGSYTQAA\ KGS[166.9984] 3     | 0.955  | 0.003    | 7.00E-04 | 1 | 30.87  | 19 | 313 | 19 | 332  | 0.29  |
| 2427.997 | 20 | P30443,P0443E | K.GGSYTQAAE\ GGSYTQAASSD 3       | 0.94   |          |          |   |        |    |     |    |      |       |

|          |    |               |                             |   |        |          |          |   |       |    |     |    |      |       |
|----------|----|---------------|-----------------------------|---|--------|----------|----------|---|-------|----|-----|----|------|-------|
| 1060.495 | 5  | P31949        | K.DGVNYTSLK.1 DGVNYTSLK     | 2 | 0.417  | 0.001    | 0.001    | 0 | 34.72 | 18 | 35  | 1  | 105  | 1.09  |
| 3366.459 | 18 | P34932        | K.NAEQNGPVD NAEQNGPVDG      | 3 | -0.197 | 0.049    | 0.003    | 0 | 19.35 | 19 | 49  | 3  | 840  | 0.95  |
| 2622.174 | 18 | P34932        | K.MQVQDEPH MQVQDEPHV        | 3 | 1.291  | 5.20E-05 | 0.001    | 0 | 48.14 | 18 | 49  | 3  | 840  | 0.45  |
| 1454.604 | 7  | P34932        | K.STNEAMEWM STNEAMEWM       | 2 | 2.197  | 2.00E-05 | 0.002    | 0 | 52.77 | 18 | 95  | 4  | 840  | 1.28  |
| 3446.425 | 17 | P34932        | K.NAEQNGPVD NAEQNGPVDG      | 3 | -0.083 | 0.037    | 0.005    | 0 | 19.53 | 18 | 105 | 4  | 840  | 1.36  |
| 3446.425 | 20 | P34932        | K.NAEQNGPVD NAEQNGPVDG      | 3 | 0.139  | 0.022    | 0.005    | 0 | 21.73 | 18 | 129 | 6  | 840  | 1.36  |
| 1449.697 | 9  | P35221        | R.NAGNEODIG NAGNEODIG       | 2 | 0.449  | 0.001    | 0.002    | 0 | 36.03 | 19 | 156 | 6  | 906  | 1.02  |
| 1898.849 | 9  | P35221,P26232 | R.TSVQTEDDQL TS[166.9984]V  | 2 | 1.43   | 1.00E-04 | 0.001    | 0 | 46.85 | 20 | 132 |    |      | 0.61  |
| 2141.982 | 15 | P35221,P26232 | R.SRTSVQTEDD SRTSVQTT[181.C | 3 | 1.205  | 0.002    | 0.002    | 1 | 32.39 | 18 | 110 |    |      | 1.09  |
| 2141.982 | 13 | P35221,P26232 | R.SRTSVQTEDD SRTS[166.9984  | 2 | 2.159  | 2.80E-08 | 3.00E-04 | 1 | 81.4  | 18 | 132 |    |      | 0.16  |
| 2221.948 | 13 | P35221,P26232 | R.SRTSVQTEDD SRT[181.014]S  | 2 | 0.142  | 0.002    | 0.001    | 1 | 30.95 | 17 | 110 |    |      | 0.5   |
| 2221.948 | 11 | P35221,P26232 | R.SRTSVQTEDD S[166.9984]RT  | 2 | 0.894  | 4.50E-04 | 0.001    | 1 | 38.49 | 17 | 132 |    |      | 0.5   |
| 2141.982 | 12 | P35221,P26232 | R.SRTSVQTEDD S[166.9984]RT  | 2 | 1.944  | 3.60E-07 | 3.00E-04 | 1 | 70.32 | 18 | 110 |    |      | 0.16  |
| 2221.948 | 9  | P35221,P26232 | R.SRTSVQTEDD S[166.9984]RT  | 2 | 0.944  | 0.004    | 0.003    | 1 | 28.79 | 17 | 198 |    |      | 1.36  |
| 2141.982 | 12 | P35221,P26232 | R.SRTSVQTEDD SRT[181.014]S  | 2 | 2.197  | 5.30E-06 | 3.00E-04 | 1 | 58.65 | 18 | 198 |    |      | 0.16  |
| 1898.849 | 11 | P35221,P26232 | R.TSVQTEDDQL TSVQTT[181.014 | 3 | 1.317  | 5.30E-04 | 0.002    | 0 | 39.6  | 19 | 188 |    |      | 1.25  |
| 1898.849 | 9  | P35221,P26232 | R.TSVQTEDDQL T[181.014]SVQ  | 2 | 1.428  | 1.00E-04 | 0.001    | 0 | 46.83 | 20 | 110 |    |      | 0.61  |
| 1860.842 | 8  | P35222        | R.RTSMGGTQC RTS[166.9984]J  | 3 | 1.156  | 0.002    | 0.002    | 1 | 31.9  | 18 | 60  | 3  | 781  | 1.11  |
| 1704.741 | 11 | P35222        | R.TSMGGTQC TS[166.9984]M    | 2 | 1.669  | 7.00E-05 | 0.002    | 0 | 48.24 | 19 | 48  | 2  | 781  | 1.33  |
| 1860.842 | 8  | P35222        | R.RTSMGGTQC RTS[166.9984]J  | 3 | 0.557  | 0.008    | 0.002    | 1 | 25.93 | 18 | 50  | 3  | 781  | 1.11  |
| 1704.741 | 7  | P35222        | R.TSMGGTQC TSMGGT[181.0     | 3 | 0.614  | 0.008    | 0.002    | 0 | 27.51 | 19 | 55  | 2  | 781  | 1.04  |
| 879.368  | 3  | P35240        | R.MSFSSLR MSFSS[166.998     | 2 | -0.517 | 0.009    | 6.00E-04 | 0 | 21.38 | 14 | 21  | 2  | 595  | 0.73  |
| 2013.865 | 11 | P35251        | K.ELSQNTDESQ S[166.9984]C   | 2 | 2.159  | 1.40E-05 | 0.001    | 0 | 55.43 | 19 | 55  | 1  | 1148 | 0.69  |
| 1931.73  | 8  | P35268        | R.YFQINQDEEE YFQINQDEEE     | 2 | 2.077  | 2.90E-05 | 0.002    | 0 | 49.3  | 16 | 49  | 1  | 128  | 0.78  |
| 1998.888 | 10 | P35269        | R.GNSRPGTSPA GNS[166.9984   | 3 | 1.291  | 5.90E-05 | 0.003    | 0 | 48.97 | 19 | 114 | 5  | 517  | 1.28  |
| 1998.888 | 9  | P35269        | R.GNSRPGTSPA GNSRPGT[181.   | 2 | 1.145  | 0.009    | 0.001    | 0 | 27.4  | 19 | 114 | 5  | 517  | 0.53  |
| 2078.854 | 10 | P35269        | R.GNSRPGTSPA GNS[166.9984   | 3 | 1.256  | 4.10E-04 | 0.002    | 0 | 39.22 | 18 | 73  | 5  | 517  | 1.07  |
| 1998.888 | 11 | P35269        | R.GNSRPGTSPA GNSRPGT[16     | 2 | -0.095 | 0.004    | 0.001    | 0 | 30.58 | 19 | 71  | 4  | 517  | 0.53  |
| 1234.535 | 7  | P35367        | R.SGSLGDLVII S[166.9984]2   | 2 | 0.215  | 0.002    | 0.001    | 0 | 32.7  | 18 | 33  | 1  | 487  | 0.97  |
| 1087.507 | 6  | P35367        | R.SLPSFSEIKL SLPS[166.9984  | 2 | -1.166 | 0.042    | 0.001    | 0 | 18.9  | 18 | 35  | 2  | 487  | 1.2   |
| 1228.54  | 9  | P35368        | R.HDSGPLFTFK HDS[166.9984   | 2 | 0.627  | 6.70E-04 | 0.002    | 0 | 36.82 | 18 | 37  | 1  | 520  | 1.45  |
| 1586.766 | 10 | P35527        | K.VQALEEANNI VQALEEANNL     | 2 | 1.716  | 6.10E-05 | 0.002    | 0 | 47.71 | 18 | 48  | 2  | 623  | 1.07  |
| 1315.685 | 13 | P35527        | K.DQIVDLTVGN DQIVDLTVGN     | 2 | 2.172  | 2.00E-05 | 0.001    | 0 | 52.81 | 18 | 53  | 3  | 623  | 0.89  |
| 2709.086 | 17 | P35568        | R.ASSDGEETM AS[166.9984]S   | 3 | 0.311  | 0.017    | 0.002    | 0 | 23.43 | 18 | 23  | 4  | 1242 | 0.63  |
| 879.408  | 5  | P35568        | R.VNLSPNR.N VNLS[166.9984   | 2 | -1.087 | 0.043    | 4.00E-04 | 0 | 18.68 | 17 | 41  | 7  | 1242 | 0.47  |
| 1377.558 | 9  | P35568        | R.KGSGDYMPV KGS[166.9984]   | 2 | 0.744  | 5.90E-04 | 0.002    | 1 | 36.98 | 17 | 73  | 6  | 1242 | 1.65  |
| 1730.749 | 9  | P35568        | R.HSSETFSSTF R[166.9984]    | 3 | 0.103  | 0.024    | 0.002    | 1 | 21.39 | 18 | 27  | 5  | 1242 | 1.47  |
| 1457.524 | 9  | P35568        | R.KGSGDYMPV KGS[166.9984]   | 2 | 0.737  | 6.10E-04 | 0.001    | 1 | 33.91 | 14 | 73  | 6  | 1242 | 0.72  |
| 1574.648 | 12 | P35568        | R.HSSETFSSTF R[166.9984]    | 3 | 0.179  | 0.023    | 1.00E-04 | 0 | 21.15 | 17 | 38  | 5  | 1242 | 0.09  |
| 1348.623 | 18 | P35579        | R.DELADEIANS DELADEIANS     | 2 | 2.159  | 1.20E-05 | 0.002    | 0 | 55.68 | 19 | 282 | 12 | 1960 | 1.08  |
| 2088.979 | 11 | P35579        | R.QAQERDELQ AQAQERDELAC     | 3 | 1.291  | 3.10E-05 | 0.003    | 1 | 50.46 | 18 | 282 | 12 | 1960 | 1.3   |
| 1487.708 | 17 | P35579        | R.RQLEAEAEAE RQLEAEAEAEQ    | 2 | 0.321  | 0.002    | 0.002    | 1 | 33.76 | 18 | 217 | 10 | 1960 | 1.2   |
| 1565.675 | 10 | P35579        | R.ELEDATEAD ELEDATEADAI     | 2 | 1.159  | 6.90E-09 | 0.002    | 0 | 86.07 | 17 | 282 | 12 | 1960 | 1.43  |
| 1428.589 | 9  | P35579        | R.DELADEIANS DELADEIANS     | 2 | 2.115  | 2.40E-05 | 9.00E-04 | 0 | 51.7  | 18 | 282 | 12 | 1960 | 0.65  |
| 1888.932 | 16 | P35579        | K.KLEEEQILEDD KLEEEQILEDD   | 3 | 0.864  | 0.004    | 0.001    | 1 | 28.98 | 18 | 206 | 11 | 1960 | 0.62  |
| 1919.919 | 14 | P35579        | K.TELEDLDTST TELEDLDTSTAA   | 2 | 1.605  | 7.60E-05 | 0.004    | 0 | 45.59 | 17 | 363 | 16 | 1960 | 1.86  |
| 1653.785 | 9  | P35579        | R.IAEFTTNLTEE IAEFTTNLTEE   | 2 | 1.644  | 7.10E-05 | 0.003    | 0 | 47.98 | 19 | 363 | 16 | 1960 | 1.9   |
| 1116.578 | 7  | P35579,P3574  | R.DLGELEALK DLGELEALK       | 2 | 0.473  | 9.80E-04 | 0.002    | 0 | 36.28 | 19 | 282 |    |      | 1.47  |
| 1591.702 | 20 | P35579,P3574  | R.NTDQASMPD NTDQASMPDN      | 2 | 2.159  | 1.10E-06 | 6.00E-04 | 0 | 63.94 | 17 | 282 |    |      | 0.4   |
| 1337.608 | 8  | P35606        | K.DNNQFASASL DNNQFASASL     | 2 | 2.159  | 1.80E-06 | 0.002    | 0 | 63.13 | 18 | 92  | 4  | 906  | 1.34  |
| 2727.335 | 20 | P35606        | R.STAQOELDGH STAQOELDGH     | 3 | 1.291  | 7.00E-05 | 0.002    | 0 | 46.27 | 18 | 92  | 4  | 906  | 0.55  |
| 5236.303 | 12 | P35611        | K.EEEAHRPPSP EEEAHRPPSPTE   | 4 | 1.197  | 0.002    | 0.009    | 0 | 29.54 | 15 | 62  | 4  | 737  | 1.8   |
| 1433.631 | 9  | P35611        | R.SPGSPVGEET SPGS[166.9984  | 2 | 1.815  | 4.90E-05 | 0.002    | 0 | 48.7  | 18 | 62  | 4  | 737  | 1.59  |
| 5316.269 | 20 | P35611        | K.EEEAHRPPSP EEEAHRPPSP     | 4 | -0.295 | 0.015    | 0.007    | 0 | 20.42 | 15 | 58  | 3  | 737  | 1.3   |
| 5236.303 | 8  | P35611        | K.EEEAHRPPSP EEEAHRPPSP     | 4 | -0.295 | 0.026    | 0.009    | 0 | 17.86 | 15 | 58  | 3  | 737  | 1.8   |
| 5236.303 | 27 | P35611        | K.EEEAHRPPSP EEEAHRPPSP     | 4 | 0.033  | 0.002    | 0.009    | 0 | 29.1  | 15 | 72  | 3  | 737  | 1.8   |
| 2020.922 | 13 | P35613        | R.RKPEDVLDLDD RKPEDVLDLDD   | 3 | 0.582  | 0.01     | 0.002    | 1 | 26.16 | 18 | 71  | 3  | 385  | 1.15  |
| 1864.821 | 14 | P35613        | R.RKPEDVLDLDD RKPEDVLDLDD   | 3 | 2.159  | 5.90E-07 | 0.002    | 0 | 68.3  | 19 | 117 | 4  | 385  | 1.03  |
| 1940.956 | 8  | P35613        | R.RKPEDVLDLDD RKPEDVLDLDD   | 3 | 1.101  | 1.30E-05 | 0.002    | 1 | 54.16 | 18 | 136 | 4  | 385  | 1.26  |
| 1751.785 | 11 | P35658        | K.SPGSTPTTPTS SPGSTPTTPT    | 2 | 0.47   | 0.001    | 0.001    | 0 | 36.25 | 19 | 43  | 4  | 2090 | 0.77  |
| 1751.785 | 7  | P35658        | K.SPGSTPTTPTS SPGSTPTTPT    | 2 | 0.916  | 3.80E-04 | 0.001    | 0 | 40.71 | 19 | 62  | 5  | 2090 | 0.77  |
| 1751.785 | 13 | P35658        | K.SPGSTPTTPTS S[166.9984]P  | 2 | -0.185 | 0.005    | 0.001    | 0 | 29.7  | 19 | 62  | 5  | 2090 | 0.77  |
| 1831.751 | 8  | P35658        | K.SPGSTPTTPTS SPGS[181.014  | 2 | -0.836 | 0.013    | 0.002    | 0 | 25.19 | 19 | 31  | 3  | 2090 | 0.99  |
| 1831.751 | 9  | P35658        | K.SPGSTPTTPTS S[166.9984]P  | 2 | -0.205 | 0.005    | 0.002    | 0 | 29.5  | 19 | 62  | 5  | 2090 | 0.99  |
| 1751.785 | 12 | P35658        | K.SPGSTPTTPTS SPGS[166.9984 | 2 | 2.197  | 5.40E-06 | 0.001    | 0 | 59.17 | 19 | 108 | 5  | 2090 | 0.77  |
| 1569.698 | 9  | P35658        | R.SAQGSSSPVP SAQGSSS[166.5  | 2 | 1.291  | 0.002    | 0.003    | 0 | 32.74 | 17 | 108 | 5  | 2090 | 1.76  |
| 825.412  | 4  | P35659        | K.SLIVGK.R S[166.9984]LV    | 2 | -1.112 | 0.036    | 0.001    | 0 | 20.43 | 19 | 21  | 3  | 375  | 1.16  |
| 2465.788 | 14 | P35659        | R.EESEEEDEDI EES[166.9984]  | 3 | 0.141  | 0.021    | 0.002    | 0 | 16.73 | 13 | 21  | 3  | 375  | 0.61  |
| 3359.195 | 7  | P35659        | K.EPEMGPREE EPEMGPREE       | 3 | 1.067  | 0.003    | 8.00E-04 | 1 | 28.02 | 15 | 36  | 2  | 375  | 0.23  |
| 1063.493 | 6  | P36507        | R.LNQPGTPT.R LNQPGTPT[181.0 | 2 | -0.408 | 0.009    | 0.002    | 0 | 27.47 | 19 | 27  | 1  | 400  | 1.51  |
| 1063.493 | 5  | P36507        | R.LNQPGTPT.R LNQPGTPT[181.2 | 2 | -0.007 | 0.003    | 0.002    | 0 | 31.48 | 19 | 31  | 1  | 400  | 1.51  |
| 1242.644 | 7  | P36873        | K.NVQLOENEIR NVQLOENEIR     | 2 | -0.507 | 0.01     | 0.001    | 0 | 24.51 | 17 | 25  | 1  | 323  | 0.84  |
| 2020.824 | 10 | P36915        | R.EEQDTSDDGE EQD[181.013    | 3 | 0.189  | 0.019    | 0.002    | 0 | 22.23 | 18 | 29  | 3  | 607  | 1.05  |
| 2176.926 | 9  | P36915        | R.EEQDTSDDGE EQD[166.9984   | 3 | 0.229  | 0.019    | 0.002    | 1 | 23.61 | 19 | 24  | 3  | 607  | 1.02  |
| 2020.824 | 10 | P36915        | R.EEQDTSDDGE EQD[166.9984   | 3 | 0.789  | 0.005    | 0.002    | 0 | 28.23 | 18 | 32  | 3  | 607  | 1.05  |
| 2176.926 | 10 | P36915        | R.EEQDTSDDGE EQD[181.014    | 3 | 0.24   | 0.018    | 0.002    | 1 | 23.77 | 19 | 45  | 3  | 607  | 1.02  |
| 2176.926 | 9  | P36915        | R.EEQDTSDDGE EQD[181.013    | 3 | 0.499  | 0.01     | 0.002    | 1 | 26.35 | 19 | 34  | 3  | 607  | 1.02  |
| 1359.558 | 13 | P37802        | R.NFSDNQLQEC NFS[166.9984]  | 2 | 1.079  | 2.80E-04 | 0.001    | 0 | 38.34 | 15 | 72  | 2  | 199  | 1.01  |
| 1279.591 | 8  | P37802        | R.NFSDNQLQEC NFS[166.9984]  | 2 | 1.981  | 3.50E-05 | 0.002    | 0 | 50.36 | 18 | 72  | 2  | 199  | 1.72  |
| 1515.684 | 11 | P38159        | K.VEQATKPSFE VEQATKPSFE     | 2 | 0.994  | 0.004    | 5.00E-04 | 0 | 30.28 | 18 | 62  | 6  | 391  | 0.33  |
| 1515.684 | 10 | P38159        | K.VEQATKPSFE VEQATKPSFE     | 2 | 0.883  | 3.90E-04 | -0.001   | 0 | 39.37 | 18 | 62  | 8  | 391  | -0.66 |
| 929.413  | 4  | P38159,QB6E3  | R.DVYLSR.D DVYLS[166.998    | 2 | -0.539 | 0.011    | 4.00E-04 | 0 | 24.16 | 17 | 63  |    |      | 0.42  |
| 1611.678 | 9  | P38159,QB6E3  | R.DRDYSDHPSG DRDYS[166.998  | 2 | -0.132 | 0.042    | 0.002    | 1 | 18.04 | 17 | 67  |    |      | 1.34  |
| 1177.476 | 9  | P38159,QB6E3  | R.DSYESYGNR DSYESYGNR       | 2 | -0.672 | 0.014    | 0.001    | 0 | 20.17 | 17 | 76  |    |      | 0.85  |
| 1451.616 | 8  | P38398        | R.HOSESQVGI HOSESQVGLS      | 2 | -1.079 | 0.036    | 6.00E-04 | 0 | 18.76 | 17 | 19  | 4  | 1863 | 0.4   |
| 1901.81  |    |               |                             |   |        |          |          |   |       |    |     |    |      |       |

|          |    |               |                               |   |        |          |          |   |       |    |     |    |      |       |
|----------|----|---------------|-------------------------------|---|--------|----------|----------|---|-------|----|-----|----|------|-------|
| 1752.805 | 11 | P41229        | K.VQGLLENGD VQGLLENGDSV       | 2 | 2.159  | 6.90E-06 | 0.001    | 0 | 57.77 | 19 | 58  | 2  | 1560 | 0.77  |
| 1381.672 | 9  | P41970        | R.AASPVLLSSN AAS[166.9984]    | 2 | -1.175 | 0.047    | 0.001    | 0 | 19.78 | 19 | 20  | 1  | 407  | 0.9   |
| 1365.605 | 8  | P42166        | R.SHSDQSPSS SHSDQSPSS[166.9   | 2 | 0.329  | 0.002    | 5.00E-04 | 0 | 33.84 | 18 | 134 | 7  | 694  | 0.38  |
| 1365.605 | 8  | P42166        | R.SHSDQSPSS SHSDQSPSS[166.9   | 2 | -1.172 | 0.042    | 0.002    | 0 | 19.82 | 19 | 151 | 8  | 694  | 1.33  |
| 2730.144 | 17 | P42166,P42167 | K.GPPDFSSDEE GPPDFSS[166.99   | 3 | 1.243  | 0.002    | 0.003    | 1 | 33.75 | 19 | 193 |    |      | 1.1   |
| 2650.178 | 17 | P42166,P42167 | K.GPPDFSSDEE GPPDFSS[166.99   | 3 | 1.291  | 1.10E-04 | 0.002    | 1 | 46.34 | 19 | 193 |    |      | 0.88  |
| 1727.785 | 11 | P42166,P42167 | R.SSTPLPTISSA SSTPLPTISS[16   | 2 | 1.985  | 3.00E-05 | 0.002    | 0 | 51.4  | 19 | 193 |    |      | 1.43  |
| 1727.785 | 12 | P42166,P42167 | R.SSTPLPTISSA SST[181.014]P   | 2 | 2.159  | 4.50E-07 | 0.002    | 0 | 69.33 | 18 | 193 |    |      | 1.08  |
| 2650.178 | 24 | P42166,P42167 | K.GPPDFSSDEE GPPDFSSDEERE     | 3 | 1.291  | 4.40E-04 | 0.003    | 1 | 40.39 | 19 | 193 |    |      | 1.07  |
| 2650.178 | 11 | P42166,P42167 | K.GPPDFSSDEE GPPDFSS[166.9    | 3 | 1.127  | 9.00E-04 | 0.002    | 1 | 37.23 | 19 | 134 |    |      | 0.88  |
| 1727.785 | 12 | P42166,P42167 | R.SSTPLPTISSA SSTPLPTISS[166  | 2 | 0.528  | 8.50E-04 | 0.002    | 0 | 36.82 | 19 | 131 |    |      | 1.43  |
| 2083.85  | 11 | P42167        | K.EMFPYEASTP EMFPYEASTPT      | 2 | -0.82  | 0.022    | 0.004    | 0 | 22.35 | 18 | 170 | 6  | 454  | 1.75  |
| 1138.514 | 5  | P42345        | R.TLDDSPELR S TLDDSP[166.998  | 2 | -0.544 | 0.01     | 0.002    | 0 | 24.11 | 17 | 24  | 2  | 2549 | 1.96  |
| 1752.763 | 16 | P42566        | K.LNDPFPQPPG LNDPFPQPPGN      | 2 | -0.124 | 0.005    | 0.003    | 0 | 30.31 | 19 | 43  | 2  | 896  | 1.6   |
| 998.423  | 8  | P42566        | K.LDSDPPFK L DSD[166.9984]F   | 2 | 0.289  | 0.002    | 8.00E-04 | 0 | 29.44 | 14 | 43  | 2  | 896  | 0.75  |
| 1373.598 | 11 | P42677        | K.DLLHSPPEEK DLLHSP[166.99    | 2 | 0.725  | 6.60E-04 | 0.002    | 0 | 37.8  | 18 | 47  | 3  | 84   | 1.3   |
| 1049.412 | 5  | P42677,Q71UN  | R.LTEGCFR R LTEGCF[160.030    | 2 | -0.261 | 0.006    | 8.00E-04 | 0 | 25.94 | 16 | 47  |    |      | 0.79  |
| 1126.503 | 7  | P42684        | K.SPSSLEDAK S[166.9984]PSS    | 2 | 0.048  | 0.003    | 0.001    | 0 | 31.01 | 18 | 79  | 4  | 1182 | 1.04  |
| 1762.695 | 6  | P42684        | R.SNSTSMSSG SNST[181.014]P    | 2 | -0.765 | 0.019    | 0.002    | 0 | 21.9  | 17 | 43  | 2  | 1182 | 0.83  |
| 1369.625 | 8  | P42684        | R.DKSPSSLEDA DKS[166.9984]P   | 2 | 0.4784 | 4.70E-04 | 0.002    | 1 | 40.35 | 20 | 88  | 3  | 1182 | 1.15  |
| 1762.695 | 9  | P42684        | R.SNSTSMSSG SNST[166.9984]P   | 2 | 2.197  | 8.20E-06 | 0.002    | 0 | 55.57 | 17 | 113 | 3  | 1182 | 0.83  |
| 2860.249 | 10 | P42694        | R.RISSSSVQPCS RISSSS[166.998  | 3 | 1.127  | 8.20E-05 | 0.004    | 1 | 46.24 | 18 | 46  | 2  | 1942 | 1.48  |
| 2860.249 | 10 | P42694        | R.RISSSSVQPCS RISS[166.9984]S | 3 | 1.101  | 7.60E-04 | 0.004    | 1 | 36.55 | 18 | 37  | 1  | 1942 | 1.48  |
| 2860.249 | 10 | P42694        | R.RISSSSVQPCS RISS[166.9984]S | 3 | 1.193  | 7.50E-04 | 0.004    | 1 | 36.61 | 18 | 37  | 2  | 1942 | 1.48  |
| 1481.59  | 9  | P42696        | R.SVQEGENPDI S[166.9984]VQ    | 2 | 1.287  | 1.60E-04 | 0.002    | 0 | 40.42 | 15 | 40  | 3  | 430  | 1.55  |
| 1418.656 | 8  | P42858        | K.EPGEQASVPL EPGEQASVPLS      | 2 | -0.241 | 0.005    | 5.00E-04 | 0 | 29.14 | 19 | 29  | 1  | 3142 | 0.37  |
| 2146.864 | 11 | P43243        | K.NEENTEPGA NEENTEPGAES       | 2 | 2.159  | 1.30E-07 | 0.002    | 0 | 74.62 | 18 | 187 | 6  | 847  | 1.13  |
| 2226.831 | 10 | P43243        | K.NEENTEPGA NEENT[181.01]P    | 2 | 0.988  | 3.50E-04 | 2.00E-04 | 0 | 39.43 | 17 | 187 | 6  | 847  | 0.09  |
| 2226.831 | 11 | P43243        | K.NEENTEPGA NEENTEPGAES       | 2 | 2.159  | 1.60E-08 | 0.002    | 0 | 82.7  | 17 | 187 | 6  | 847  | 0.72  |
| 2857.095 | 19 | P43243        | K.DTSENADQG DTSENADQGS        | 3 | -0.093 | 0.037    | 0.002    | 1 | 18.1  | 17 | 152 | 8  | 847  | 0.71  |
| 1556.555 | 7  | P43243        | R.SYSPDGKESPV SY[243.029]SF   | 2 | -0.817 | 0.021    | 0.004    | 1 | 17.41 | 13 | 126 | 7  | 847  | 2.56  |
| 2226.831 | 19 | P43243        | K.NEENTEPGA NEENTEPGAES       | 2 | 2.172  | 3.90E-08 | 0.002    | 0 | 78.83 | 17 | 187 | 6  | 847  | 0.72  |
| 3375.452 | 29 | P43699        | K.AAQQLQD AQQQLQDQDS          | 4 | 3.289  | 1.60E-05 | 0.003    | 0 | 54.46 | 19 | 114 | 2  | 371  | 0.77  |
| 1508.667 | 8  | P45880        | K.LTFDTFSPNI LTFDTFSS[166.1   | 2 | 0.495  | 9.30E-04 | 0.003    | 0 | 36.48 | 19 | 36  | 2  | 294  | 2.13  |
| 1189.595 | 7  | P45973        | K.DTDEADLVLA DTDEADLVLA       | 2 | -0.291 | 0.005    | 0.001    | 0 | 28.64 | 19 | 29  | 1  | 191  | 1.21  |
| 1431.589 | 11 | P46013        | K.SSPELEDTATS SS[166.9984]PE  | 2 | -0.652 | 0.014    | 0.002    | 0 | 22.03 | 16 | 92  | 12 | 3256 | 1.29  |
| 2287.983 | 21 | P46013        | K.SGGSGHAVA SGGSGHAVA         | 3 | 0.239  | 0.018    | 0.001    | 0 | 22.71 | 18 | 128 | 17 | 3256 | 0.5   |
| 1582.646 | 7  | P46013        | K.SPPSPMDTP S[166.9984]P      | 2 | 0.77   | 5.10E-04 | 7.00E-04 | 0 | 38.25 | 18 | 128 | 17 | 3256 | 0.46  |
| 1519.668 | 10 | P46013        | K.SPQDPVDTP S[166.9984]PQ     | 2 | -0.674 | 0.014    | 2.00E-04 | 0 | 25.81 | 20 | 128 | 17 | 3256 | 0.13  |
| 1522.667 | 7  | P46013        | K.SPPSPVDTP S[166.9984]P      | 2 | 0.921  | 3.50E-04 | -0.002   | 0 | 38.76 | 17 | 128 | 17 | 3256 | -1.16 |
| 1399.651 | 6  | P46013        | K.DINTFVGTPI DINTFVGT[181.2   | 2 | -1.099 | 0.038    | 0.002    | 0 | 19.56 | 18 | 128 | 17 | 3256 | 1.22  |
| 1712.764 | 7  | P46013        | K.TPVQYQQQ TPVQYQQQNS         | 2 | -0.559 | 0.01     | 0.004    | 0 | 26.96 | 20 | 92  | 12 | 3256 | 2.43  |
| 1632.824 | 9  | P46019        | K.SLNLVDSQPI S[166.9984]LNI   | 2 | -0.246 | 0.005    | 0.003    | 0 | 28.08 | 18 | 28  | 3  | 1235 | 1.72  |
| 1481.688 | 10 | P46087        | K.GTDTQTPAVL GTDTQTPAVLS      | 2 | 1.427  | 1.20E-04 | 0.002    | 0 | 44.82 | 18 | 45  | 1  | 812  | 1.6   |
| 2487.304 | 19 | P46100        | R.RPTETNPVS RPTETNPVTSN       | 3 | 1.291  | 1.10E-04 | 0.004    | 0 | 45.33 | 18 | 57  | 6  | 2492 | 1.49  |
| 1350.546 | 7  | P46100        | R.ETFSSAEGTV ETFSS[166.998    | 2 | -0.066 | 0.004    | 0.001    | 0 | 29.89 | 18 | 57  | 6  | 2492 | 0.76  |
| 1410.64  | 5  | P46100        | R.EVIEEDASPT EVIEEDASPT[1.2   | 2 | -0.35  | 0.007    | 0.002    | 0 | 28.03 | 19 | 84  | 6  | 2492 | 0.82  |
| 1350.546 | 9  | P46100        | R.ETFSSAEGTV ETFSS[166.998    | 2 | -1.132 | 0.044    | 0.001    | 0 | 19.23 | 18 | 54  | 8  | 2492 | 0.76  |
| 1798.731 | 13 | P46379        | R.ENASAPGTT ENAS[166.9984]T   | 2 | 2.159  | 6.40E-06 | 0.002    | 0 | 58.39 | 19 | 81  | 5  | 1132 | 1.01  |
| 2644.074 | 18 | P46379        | R.ASPREPQRENA AS[166.9984]P   | 3 | 1.291  | 3.10E-04 | 0.002    | 1 | 40.92 | 18 | 81  | 5  | 1132 | 0.89  |
| 2644.074 | 15 | P46379        | R.ASPREPQRENA AS[166.9984]P   | 3 | 1.127  | 0.002    | 0.002    | 1 | 32.69 | 18 | 72  | 5  | 1132 | 0.89  |
| 1798.731 | 13 | P46379        | R.ENASAPGTT ENASAPGTT[1.2     | 2 | 0.149  | 0.021    | 0.003    | 0 | 22.85 | 19 | 70  | 4  | 1132 | 1.62  |
| 3020.382 | 7  | P46379        | R.VGDPPOPLPE VGDPPPOPLPEE     | 3 | -0.137 | 0.042    | 0.003    | 1 | 19.96 | 19 | 95  | 5  | 1132 | 0.86  |
| 1502.635 | 7  | P46776        | R.NQSFCTVNL NQSF[166.9984]P   | 2 | -0.109 | 0.004    | 0.002    | 0 | 27.45 | 16 | 27  | 2  | 148  | 1.65  |
| 839.396  | 5  | P46776        | -MPSRLR.K MPS[166.9984]P      | 2 | -0.764 | 0.016    | 7.00E-04 | 1 | 17.92 | 13 | 18  | 1  | 148  | 0.83  |
| 1982.863 | 19 | P46821        | R.ESSPLSPPTS ESS[166.9984]SF  | 2 | -0.567 | 0.011    | 0.002    | 0 | 24.88 | 18 | 213 | 11 | 2468 | 1.19  |
| 1570.631 | 14 | P46821        | K.SPSSDGSYSY S[166.9984]PSS   | 2 | 1.732  | 5.80E-05 | 0.002    | 0 | 46.87 | 17 | 166 | 7  | 2468 | 1.05  |
| 2334.844 | 15 | P46821        | K.FEDEGAFEE FEDEGAFEEES       | 2 | 2.159  | 2.80E-07 | 7.00E-04 | 0 | 67.82 | 15 | 213 | 11 | 2468 | 0.28  |
| 2093.898 | 9  | P46821        | R.ASVSPMDEPA ASVS[166.998     | 2 | 1.654  | 6.90E-05 | 0.002    | 0 | 48.09 | 19 | 213 | 11 | 2468 | 0.8   |
| 2093.898 | 18 | P46821        | R.ASVSPMDEPA ASVSMPDEPVP      | 2 | 2.159  | 5.90E-07 | 0.002    | 0 | 68.7  | 19 | 213 | 11 | 2468 | 0.89  |
| 1502.714 | 7  | P46821        | K.SPSSPSPSPS SPSSPSPSS[166    | 2 | -0.158 | 0.005    | 0.002    | 0 | 29.97 | 19 | 213 | 11 | 2468 | 1.01  |
| 1394.693 | 9  | P46821        | K.VQSLGKLSF VQSLGKLS[1.2      | 2 | -0.561 | 0.011    | 0.002    | 1 | 25.94 | 19 | 169 | 9  | 2468 | 1.05  |
| 1982.863 | 9  | P46821        | R.ESSPLSPPTS ESS[166.9984]F   | 2 | -1.178 | 0.046    | 0.002    | 0 | 18.77 | 18 | 169 | 9  | 2468 | 1.19  |
| 1073.419 | 6  | P46821        | R.GAESPFEEK S GAES[166.998    | 2 | -1.08  | 0.038    | -0.001   | 0 | 16.75 | 15 | 169 | 9  | 2468 | -1    |
| 1570.631 | 6  | P46821        | K.SPSSDGSYSY SPS[166.9984]S   | 2 | 1.418  | 1.20E-04 | 0.002    | 0 | 43.72 | 17 | 212 | 14 | 2468 | 1.05  |
| 1774.617 | 15 | P46821        | K.GEAEQSEEA GEAEQS[166.99     | 2 | 2.197  | 8.10E-08 | 0.002    | 0 | 72.36 | 14 | 172 | 9  | 2468 | 1.18  |
| 2043.851 | 12 | P46821        | K.HMDPPPAPV HMDPPPAPVQ        | 3 | -0.207 | 0.049    | 0.002    | 1 | 18.27 | 18 | 330 | 16 | 2468 | 1.06  |
| 1287.554 | 6  | P46821        | R.SLMSPELTI SLMS[166.998      | 2 | -0.945 | 0.026    | 0.002    | 0 | 21.08 | 18 | 330 | 16 | 2468 | 1.26  |
| 2062.829 | 6  | P46821        | R.ESSPLSPPTS ESS[166.9984]F   | 2 | -0.746 | 0.017    | 0.003    | 0 | 22.09 | 17 | 166 | 10 | 2468 | 1.37  |
| 2464.509 | 9  | P46821        | K.QGSPDQVSPV QGS[166.998      | 2 | 0.031  | 0.003    | 0.005    | 0 | 30.87 | 18 | 177 | 10 | 2468 | 1.89  |
| 1642.707 | 7  | P46934        | R.RQISEETESV RQISE[166.998    | 2 | -0.13  | 0.004    | 0.001    | 1 | 29.25 | 18 | 29  | 2  | 1319 | 0.85  |
| 1642.707 | 12 | P46934        | R.RQISEETESV RQISE[181.0      | 2 | -0.813 | 0.018    | 0.001    | 1 | 22.4  | 18 | 22  | 3  | 1319 | 0.85  |
| 1860.86  | 13 | P46937        | R.QASTDAGTA QAS[166.9984]     | 2 | 2.159  | 1.20E-05 | 0.002    | 0 | 55.22 | 19 | 113 | 2  | 504  | 1.03  |
| 1860.86  | 12 | P46937        | R.QASTDAGTA QAST[181.014]     | 2 | 0.477  | 9.40E-04 | 0.002    | 0 | 36.35 | 19 | 55  | 2  | 504  | 1.03  |
| 2077.998 | 15 | P47712        | K.HIVNSDSDS HIVNSDSDS[1.3     | 3 | 1.291  | 4.80E-04 | 0.003    | 0 | 36.6  | 16 | 66  | 3  | 749  | 1.58  |
| 1880.911 | 13 | P47736        | R.RSSAIGIENI RSS[166.9984]P   | 3 | 1.224  | 4.80E-04 | 0.003    | 1 | 38.47 | 18 | 38  | 1  | 663  | 1.38  |
| 1348.527 | 6  | P47736        | R.SQSDAMGI SQS[166.9984]P     | 2 | 0.409  | 0.001    | 1.00E-04 | 0 | 31.63 | 15 | 110 | 3  | 663  | 0.11  |
| 1231.541 | 12 | P47756        | K.DYLLCDYLR L DYLLC[160.030   | 2 | 0.566  | 9.30E-04 | 0.002    | 0 | 32.21 | 14 | 32  | 2  | 277  | 1.32  |
| 1720.725 | 8  | P48382        | K.GSESPMGPI GS[166.9984]E     | 2 | 0.556  | 8.40E-04 | 0.003    | 0 | 36.11 | 18 | 36  | 2  | 616  | 1.58  |
| 1720.725 | 11 | P48382        | K.GSESPMGPI GSE[166.998       | 2 | 0.161  | 0.002    | 0.003    | 0 | 32.16 | 18 | 32  | 3  | 616  | 1.58  |
| 1534.646 | 8  | P48552        | K.SEPSPQDFSI SEPVS[166.998    | 2 | 0.176  | 0.002    | 0.002    | 0 | 32.34 | 18 | 32  | 2  | 1158 | 1.54  |
| 1407.506 | 9  | P48634        | R.SDSGSSSEPI SDS[166.9984]P   | 2 | 2.119  | 2.10E-05 | 0.001    | 0 | 48.22 | 14 | 70  | 7  | 2157 | 0.99  |
| 1513.726 | 7  | P48634        | R.KOSSSEISLAV KOS[166.9984]P  | 2 | 2.159  | 3.50E-06 | 0.002    | 1 | 60.03 | 18 | 135 | 12 | 2157 | 1.1   |
| 1513.726 | 6  | P48634        | R.KOSSSEISLAV KOSSS[166.998   | 3 | 0.964  | 0.004    | 0.002    | 1 | 29.96 | 18 | 135 | 12 | 2157 | 0.97  |
|          |    |               |                               |   |        |          |          |   |       |    |     |    |      |       |

|          |    |               |                             |   |        |          |           |   |        |    |     |    |      |       |
|----------|----|---------------|-----------------------------|---|--------|----------|-----------|---|--------|----|-----|----|------|-------|
| 3705.52  | 17 | P49006        | K.GAEASAASEE GAEASAAS[166   | 3 | 1.138  | 0.002    | 0.001     | 0 | 31.7   | 18 | 281 | 9  | 195  | 0.32  |
| 3705.52  | 17 | P49006        | K.GAEASAASEE GAEASAASEE.3   | 3 | 0.582  | 0.008    | 0.001     | 0 | 26.16  | 18 | 243 | 11 | 195  | 0.32  |
| 3705.52  | 9  | P49006        | K.GAEASAASEE GAEAS[166.99   | 3 | 1.101  | 0.002    | 0.001     | 0 | 32.56  | 18 | 243 | 11 | 195  | 0.32  |
| 3257.412 | 24 | P49006        | K.GEGESPPVNG GEGESPPVNGT    | 3 | 0.159  | 0.024    | 0.003     | 0 | 21.94  | 18 | 271 | 9  | 195  | 0.84  |
| 3705.52  | 17 | P49006        | K.GAEASAASEE GAEASAASEE.3   | 3 | 0.343  | 0.014    | 0.004     | 0 | 23.79  | 18 | 246 | 9  | 195  | 1.05  |
| 3625.553 | 15 | P49006        | K.GAEASAASEE GAEASAASEE.3   | 3 | 1.127  | 4.70E-04 | 0.002     | 0 | 38.98  | 18 | 271 | 9  | 195  | 0.67  |
| 3493.334 | 16 | P49006        | K.EGGGDDSSASE EGGGDDSS[166  | 3 | 1.342  | 9.50E-05 | 9.00E-04  | 0 | 44.86  | 17 | 159 | 7  | 195  | 0.25  |
| 3493.334 | 19 | P49006        | K.EGGGDDSSASE EGGGDDSSASP   | 3 | 0.659  | 0.007    | 0.002     | 0 | 25.93  | 17 | 243 | 11 | 195  | 0.45  |
| 1844.748 | 9  | P49023        | K.TSSVSNQDTS TSSVSNQDVS[2   | 3 | -0.159 | 0.004    | 0.001     | 0 | 29.96  | 19 | 44  | 4  | 591  | 0.62  |
| 1632.636 | 6  | P49023        | R.SSPGGQDEGI SS[166.9984]P  | 2 | 0.191  | 0.002    | -9.00E-04 | 0 | 32.46  | 18 | 44  | 4  | 591  | -0.54 |
| 1632.636 | 9  | P49023        | R.SSPGGQDEGI S[166.9984]SP  | 2 | 0.889  | 3.60E-04 | -9.00E-04 | 0 | 39.43  | 18 | 51  | 3  | 591  | -0.54 |
| 1908.843 | 9  | P49189        | R.EREDEIATME EREDEIATME[C   | 3 | 0.7    | 0.007    | 0.002     | 1 | 27.35  | 18 | 27  | 2  | 494  | 1.18  |
| 1446.557 | 7  | P49321        | K.SVSGTDVQEE S[166.9984]V   | 2 | -0.24  | 0.005    | 0.004     | 0 | 27.15  | 17 | 27  | 4  | 788  | 2.72  |
| 2171.861 | 6  | P49321        | K.TEDESLENN TEDES[166.998   | 2 | 0.362  | 0.001    | 0.002     | 0 | 33.16  | 17 | 45  | 5  | 788  | 0.7   |
| 1468.603 | 7  | P49327        | K.ADEASELACP ADEASELAC[16   | 2 | 2.159  | 9.30E-07 | 0.001     | 0 | 63.93  | 16 | 98  | 2  | 2511 | 0.87  |
| 1272.536 | 8  | P49327        | R.LGMLSPEGTC LGMLS[166.99   | 2 | 0.658  | 7.40E-04 | 0.002     | 0 | 35.13  | 16 | 78  | 2  | 2511 | 1.2   |
| 1456.668 | 8  | P49368        | K.KGESQTDIEIT KGES[166.998  | 2 | -0.908 | 0.024    | 0.003     | 1 | 21.47  | 18 | 21  | 1  | 545  | 1.85  |
| 1754.686 | 7  | P49407        | K.EEEEDGTGSP EEEEDGT[181.0  | 2 | 0.208  | 0.002    | 0.002     | 0 | 31.63  | 17 | 79  | 4  | 418  | 0.94  |
| 2112.835 | 11 | P49407        | K.DDKEEEEDGT DDKEEEEDGTG    | 2 | 1.579  | 8.30E-05 | 0.002     | 1 | 45.34  | 17 | 79  | 4  | 418  | 1.18  |
| 2032.869 | 13 | P49407        | K.DDKEEEEDGT DDKEEEEDGTG    | 3 | -0.109 | 0.046    | 1.00E-04  | 1 | 18.25  | 17 | 104 | 4  | 418  | 0.06  |
| 1754.686 | 11 | P49407        | K.EEEEDGTGSP EEEEDGTG[S]16  | 2 | 1.562  | 8.80E-05 | 0.002     | 0 | 45.17  | 17 | 86  | 4  | 418  | 0.94  |
| 2112.835 | 14 | P49407        | K.DDKEEEEDGT DDKEEEEDGT[1   | 2 | 0.662  | 6.90E-04 | 0.002     | 1 | 36.17  | 17 | 86  | 4  | 418  | 1.84  |
| 1425.628 | 8  | P49448,P00367 | R.DDGSWEVIEK DDGSWEVIEGY    | 2 | 1.991  | 3.40E-05 | 0.002     | 0 | 49.49  | 17 | 56  |    |      | 1.34  |
| 3273.778 | 22 | P49454        | K.ITETGAVKPTI ITETGAVKPTGE  | 3 | 1.291  | 8.40E-05 | 0.004     | 0 | 46.63  | 18 | 47  | 3  | 3210 | 1.1   |
| 967.468  | 6  | P49585        | R.MLQAISPK.Q MLQAS[166.95   | 2 | 1.166  | 2.20E-04 | 1.00E-04  | 0 | 40.21  | 16 | 41  | 3  | 367  | 0.11  |
| 1407.484 | 14 | P49585        | K.AAAYDISEDI AAAYDIS[166.9  | 2 | -0.47  | 0.01     | 0.002     | 0 | 22.85  | 15 | 38  | 3  | 367  | 1.21  |
| 1446.548 | 6  | P49585        | K.TSPPCSPANL TS[166.9984]P  | 2 | 0.274  | 0.002    | 0.002     | 0 | 31.27  | 16 | 44  | 3  | 367  | 1.18  |
| 1261.576 | 7  | P49590        | R.DLSPQHMMVLI DLSPQHMMVLI   | 2 | -0.545 | 0.011    | 0.001     | 0 | 24.1   | 17 | 24  | 1  | 506  | 1.05  |
| 1973.812 | 8  | P49736        | R.GLLYDSEED GLLYDS[166.99   | 3 | 0.327  | 0.014    | 0.003     | 0 | 25.61  | 20 | 98  | 6  | 904  | 1.53  |
| 1180.499 | 9  | P49736        | R.GNDPLTSSPG GNDPLTSS[166   | 2 | 1.663  | 7.30E-05 | 0.001     | 0 | 44.18  | 15 | 96  | 5  | 904  | 1.19  |
| 1336.6   | 7  | P49736        | R.RGNDPLTSSP RGNDPLTSS[16   | 2 | -0.628 | 0.013    | 2.00E-04  | 1 | 24.27  | 18 | 158 | 7  | 904  | 0.14  |
| 1180.499 | 6  | P49736        | R.GNDPLTSSPG GNDPLT[181.0   | 2 | -0.191 | 0.005    | 0.001     | 0 | 25.62  | 15 | 96  | 5  | 904  | 1.19  |
| 1531.958 | 5  | P49756        | K.FEDEDSDVP FEDES[166.99    | 2 | -0.637 | 0.015    | 0.002     | 1 | 21.18  | 15 | 78  | 5  | 843  | 1.56  |
| 1435.658 | 5  | P49756        | K.LGASNSPQGF LGASNS[166.95  | 2 | -0.186 | 0.005    | -8.00E-04 | 0 | 26.69  | 16 | 78  | 5  | 843  | -0.55 |
| 1571.563 | 8  | P49756        | K.QEPSEEEIEI QEPSES[166.99  | 2 | 2.159  | 1.60E-05 | 0.002     | 0 | 49.25  | 14 | 78  | 5  | 843  | 1.6   |
| 1435.658 | 9  | P49756        | K.LGASNSPQGF LGASNSPQGN     | 2 | -0.112 | 0.004    | 0.002     | 0 | 30.43  | 19 | 67  | 5  | 843  | 1.55  |
| 1712.753 | 9  | P49757        | R.TNPSPTNPPS TNPSP[166.99   | 2 | -0.408 | 0.008    | 0.003     | 0 | 27.45  | 19 | 27  | 2  | 651  | 1.51  |
| 1403.588 | 6  | P49761        | R.SPEPDYLSYR S[166.9984]P   | 2 | -1.123 | 0.042    | 0.002     | 0 | 16.32  | 15 | 29  | 3  | 638  | 1.53  |
| 1722.752 | 7  | P49761        | R.YRSPEDPYLS YRS[166.9984]  | 3 | 0.32   | 0.015    | 0.002     | 1 | 24.55  | 19 | 35  | 3  | 638  | 0.94  |
| 1722.752 | 4  | P49761        | R.YRSPEDPYLS Y[243.0297]RS  | 3 | 0.11   | 0.024    | 0.002     | 1 | 22.46  | 19 | 22  | 4  | 638  | 0.94  |
| 2080.943 | 18 | P49768        | R.AAVQELSSIL AAVQELSS[166   | 2 | 0.742  | 5.30E-04 | 0.002     | 0 | 37.97  | 18 | 38  | 1  | 467  | 1.16  |
| 2080.943 | 9  | P49768        | R.AAVQELSSIL AAVQELSS[166   | 2 | -0.242 | 0.005    | 0.002     | 0 | 28.13  | 18 | 28  | 1  | 467  | 1.16  |
| 2080.943 | 18 | P49768        | R.AAVQELSSIL AAVQELSS[166   | 2 | -0.652 | 0.013    | 0.002     | 0 | 24.04  | 18 | 24  | 1  | 467  | 1.16  |
| 870.376  | 8  | P49790        | K.SPFGASPK.I S[166.9984]P   | 2 | -1.172 | 0.043    | 5.00E-04  | 0 | 17.81  | 17 | 18  | 3  | 1475 | 0.58  |
| 3149.276 | 26 | P49792        | K.NHETDGGSAI NHETDGG[S]16   | 3 | 0.317  | 0.016    | 0.001     | 0 | 23.51  | 18 | 66  | 9  | 3224 | 0.46  |
| 1361.589 | 15 | P49792        | K.SGSSFVHQAS SGSSFVHQAS[1   | 2 | -1.086 | 0.042    | 1.00E-04  | 0 | 19.67  | 18 | 96  | 12 | 3224 | 0.46  |
| 3149.276 | 28 | P49792        | K.NHETDGGSAI NHET[181.01    | 3 | 1.256  | 0.001    | 0.001     | 0 | 34.68  | 18 | 110 | 13 | 3224 | 0.1   |
| 861.375  | 6  | P49792,A6NKT  | R.YLSLPSK.S YLSL[166.9984]  | 2 | -0.538 | 0.011    | 2.00E-04  | 0 | 27.17  | 20 | 186 |    |      | 0.18  |
| 2621.209 | 15 | P49792,A6NKT  | R.EDALDSSVSS EDALDSSVSS     | 3 | 1.291  | 5.70E-04 | 0.003     | 1 | 38.27  | 18 | 186 |    |      | 1.29  |
| 2701.175 | 13 | P49792,A6NKT  | R.EDALDSSVSS EDALDSSVSS     | 3 | 1.224  | 5.90E-04 | 0.002     | 1 | 38.16  | 18 | 66  |    |      | 0.76  |
| 2621.209 | 14 | P49792,A6NKT  | R.EDALDSSVSS EDALDSSVSS     | 3 | 1.101  | 0.001    | 0.003     | 1 | 35.38  | 18 | 40  |    |      | 1.29  |
| 2490.015 | 13 | P49792,A6NKT  | K.LNQSGTSGVT LNQGS[166.99   | 3 | -0.202 | 0.048    | 0.003     | 0 | 18.33  | 18 | 88  |    |      | 1.14  |
| 2490.015 | 17 | P49792,A6NKT  | K.LNQSGTSGVT LNQSGT[S]16    | 3 | -0.078 | 0.036    | 0.003     | 0 | 19.57  | 18 | 168 |    |      | 1.14  |
| 2490.015 | 12 | P49792,A6NKT  | K.LNQSGTSGVT LNQSGTSGVT[1   | 2 | 2.197  | 4.70E-11 | 0.003     | 0 | 108.32 | 18 | 168 |    |      | 1.27  |
| 1433.642 | 14 | P49796        | R.THSEGLLQEI THS[166.9984]  | 2 | 2.159  | 1.60E-06 | 0.002     | 0 | 63.33  | 18 | 85  | 3  | 1198 | 1.31  |
| 1306.604 | 5  | P49796        | K.DLPAIQESPTR DLPAIQES[166  | 2 | 0.875  | 4.20E-04 | 0.002     | 0 | 40.3   | 19 | 85  | 3  | 1198 | 1.49  |
| 1433.642 | 5  | P49796        | R.THSEGLLQEI THSEGS[166.99  | 3 | 0.371  | 0.014    | 7.00E-04  | 0 | 24.06  | 18 | 75  | 4  | 1198 | 0.47  |
| 2177.862 | 12 | P49815        | R.SQSGTLDGES SQS[166.9984]  | 2 | 2.159  | 3.80E-08 | 0.002     | 0 | 78.31  | 17 | 78  | 3  | 1807 | 0.75  |
| 1388.621 | 6  | P49815        | R.GQEPGLPSS QEPGLPSS[S]2    | 2 | -1.092 | 0.039    | 0.002     | 0 | 19.62  | 18 | 20  | 3  | 1807 | 1.32  |
| 2177.862 | 13 | P49815        | R.SQSGTLDGES S[166.9984]Q   | 2 | 2.109  | 5.70E-10 | 0.002     | 0 | 96.48  | 17 | 96  | 3  | 1807 | 0.75  |
| 1250.614 | 8  | P49815        | K.ADVGRSLPEV ADVGRSL[166.9  | 3 | 0.065  | 0.025    | 9.00E-04  | 1 | 22.01  | 19 | 87  | 5  | 1807 | 0.7   |
| 2177.862 | 12 | P49815        | R.SQSGTLDGES SQSGT[181.01   | 2 | 2.119  | 1.80E-10 | 0.002     | 0 | 101.52 | 17 | 103 | 5  | 1807 | 0.75  |
| 1330.56  | 6  | P49915        | K.LTNMNTSPEE LTNMNTS[166.9  | 2 | -0.677 | 0.015    | 0.002     | 0 | 23.81  | 18 | 24  | 1  | 693  | 1.81  |
| 1311.656 | 12 | P49916        | K.LTTTGTQVTSPT LTTTGTQVTS[1 | 2 | 1.712  | 6.00E-05 | 0.001     | 0 | 48.67  | 19 | 49  | 3  | 1009 | 1     |
| 1845.838 | 15 | P50479        | R.IHIDPEIQDGS IHIDPEIQDGS[1 | 3 | 1.291  | 0.001    | -1.00E-04 | 0 | 34.85  | 18 | 60  | 2  | 330  | -0.08 |
| 1823.651 | 6  | P50502,Q8IZP2 | K.ADEPSSSESDI ADEPSS[166.9  | 2 | -0.351 | 0.007    | -7.00E-04 | 0 | 25.02  | 16 | 71  |    |      | -0.39 |
| 1823.651 | 11 | P50502,Q8IZP2 | K.ADEPSSSESDI ADEPSS[166.9  | 2 | -0.707 | 0.015    | -0.001    | 0 | 21.48  | 16 | 64  |    |      | -0.55 |
| 1743.684 | 8  | P50502,Q8IZP2 | K.ADEPSSSESDI ADEPSS[166    | 2 | 2.038  | 2.80E-05 | 0.002     | 0 | 49.93  | 17 | 64  |    |      | 0.98  |
| 2415.949 | 11 | P50548        | R.GSVSDCSGDT GSVS[166.998   | 2 | -1.006 | 0.031    | 0.003     | 0 | 20.49  | 18 | 20  | 1  | 548  | 1.21  |
| 2787.13  | 17 | P50552        | K.SSSVTTSETC SSSS[166.9984] | 3 | 0.215  | 0.022    | 0.004     | 0 | 21.5   | 17 | 22  | 1  | 380  | 1.37  |
| 2787.13  | 20 | P50552        | K.SSSVTTSETC SSSS[166.9984] | 3 | 0.343  | 0.016    | 0.004     | 0 | 22.78  | 17 | 23  | 1  | 380  | 1.37  |
| 3150.4   | 17 | P50851        | K.VEGSPTEAN VEGSPTEANL[3    | 3 | 0.11   | 0.023    | 0.002     | 0 | 22.44  | 19 | 67  | 5  | 2863 | 0.49  |
| 3150.4   | 21 | P50851        | K.VEGSPTEAN VEGS[166.9984]  | 3 | 1.224  | 1.80E-06 | 0.004     | 0 | 63.83  | 19 | 67  | 5  | 2863 | 1.19  |
| 3150.4   | 17 | P50851        | K.VEGSPTEAN VEGSPT[181.01   | 3 | 1.291  | 1.40E-06 | 0.004     | 0 | 64.98  | 19 | 75  | 6  | 2863 | 1.19  |
| 1382.621 | 7  | P50851        | K.ASPNVEAPQF AS[166.9984]P  | 2 | -0.135 | 0.005    | 0.001     | 0 | 28.19  | 17 | 95  | 6  | 2863 | 0.85  |
| 1336.613 | 16 | P50995        | R.DAQELYAAAGI DAQELYAAAGEN  | 2 | -0.606 | 0.014    | -7.00E-04 | 0 | 22.49  | 16 | 22  | 1  | 505  | -0.56 |
| 2812.169 | 9  | P51114        | R.RGPNYTSGYR RGNPNYTSGYGT   | 3 | 1.224  | 4.60E-05 | 8.00E-04  | 1 | 48.55  | 18 | 57  | 4  | 621  | 0.28  |
| 2812.169 | 18 | P51114        | R.RGPNYTSGYR RGNPNYTSGYGT   | 3 | 1.256  | 1.50E-04 | 8.00E-04  | 1 | 43.47  | 18 | 65  | 3  | 621  | 0.28  |
| 2892.136 | 22 | P51114        | R.RGPNYTSGYR RGNPNYTSGYGT   | 3 | 1.127  | 0.002    | 0.002     | 1 | 30.59  | 17 | 45  | 3  | 621  | 0.68  |
| 3599.431 | 11 | P51114        | K.DPDSNPYSLLI DPDSNPYSLLD   | 3 | 1.317  | 6.20E-04 | 0.005     | 0 | 34.65  | 15 | 65  | 3  | 621  | 1.47  |
| 3599.431 | 9  | P51114        | K.DPDSNPYSLLI DPDSNPYSLLD   | 3 | 0.973  | 0.004    | 0.006     | 0 | 27.07  | 15 | 65  | 3  | 621  | 1.61  |
| 3599.431 | 21 | P51114        | K.DPDSNPYSLLI DPDSNPYSLLD   | 4 | 0.777  | 0.005    | 0.005     | 0 | 25.43  | 15 | 65  | 4  | 621  | 1.28  |
| 3599.431 | 17 | P51114        | K.DPDSNPYSLLI DPDSNPYSLLD   | 3 | 1.393  | 1.10E-07 | 0.006     | 0 | 72.06  | 15 | 104 | 5  | 621  | 1.61  |
| 2236.913 | 11 | P51116        | R.TGGPAYGPSI TGGPAYGPSSD    | 2 | -0.243 | 0.006    | 0.002     | 0 | 28.15  | 18 | 28  | 2  | 673  | 0.71  |
| 1440.662 | 9  | P51523        | K.SNSEGDLDGL SNS[166.9984]  | 2 | 2.159  | 1.20E-05 | 0.003     | 0 | 55.84  | 19 | 56  | 1  | 738  | 1.91  |
| 13       |    |               |                             |   |        |          |           |   |        |    |     |    |      |       |

|          |    |               |                                |        |          |           |   |       |    |     |   |      |       |
|----------|----|---------------|--------------------------------|--------|----------|-----------|---|-------|----|-----|---|------|-------|
| 1667.731 | 8  | P52735        | K.FTSPADLDAS FT[181.014]SP/ 2  | 0.451  | 0.001    | 0.002     | 0 | 36.04 | 19 | 36  | 2 | 878  | 1.04  |
| 1405.599 | 8  | P52926        | K.QQEQPTGEP/ QQEQPTGEP/ 2      | 0.206  | 0.002    | 0.002     | 0 | 31.61 | 17 | 86  | 2 | 109  | 1.71  |
| 2203.84  | 12 | P52926        | K.KPAQEETET KPAQEETETSS 2      | 2.119  | 5.20E-06 | 0.002     | 0 | 58.19 | 18 | 77  | 2 | 109  | 0.79  |
| 1804.757 | 6  | P52943        | R.ASSVFTTGEI ASS[166.9984] 2   | -0.422 | 0.008    | 0.001     | 0 | 27.33 | 19 | 27  | 1 | 208  | 0.68  |
| 1973.776 | 8  | P52948        | R.DSENLASPSE DSENLAS[166.9 2   | 2.159  | 1.90E-07 | 0.002     | 0 | 72.34 | 18 | 142 | 5 | 1817 | 0.92  |
| 1971.749 | 16 | P52948        | K.YGLQDSDEEE YGLQDS[166.9 3    | 1.291  | 3.50E-04 | 0.002     | 0 | 36.7  | 15 | 142 | 5 | 1817 | 1.01  |
| 1343.53  | 5  | P52948        | K.ADTSQDEICSP ADTSQDEIC[160. 2 | -0.64  | 0.013    | 0.002     | 0 | 23.13 | 17 | 155 | 6 | 1817 | 1.56  |
| 1973.776 | 7  | P52948        | R.DSENLASPSE DSENLAS[161 2     | 2.084  | 7.60E-06 | 0.002     | 0 | 56.32 | 18 | 128 | 4 | 1817 | 0.92  |
| 1119.523 | 5  | P53367        | R.KWSLNTYK C.KWS[166.9984] 2   | -0.338 | 0.007    | 0.001     | 1 | 27.17 | 18 | 27  | 2 | 373  | 1.16  |
| 2711.169 | 6  | P53367        | K.NSAAEIPVTS NSAAEIPVTSN( 3    | 0.949  | 0.004    | 0.003     | 1 | 30.83 | 19 | 40  | 3 | 373  | 1.23  |
| 991.428  | 5  | P53367        | K.WSLNTYK.C WSL[166.9984] 2    | -1.034 | 0.032    | 8.00E-04  | 0 | 19.21 | 17 | 40  | 3 | 373  | 0.76  |
| 1323.594 | 8  | P53621        | K.NLSPGAVESD NLS[166.9984] 2   | 0.655  | 6.50E-04 | 0.002     | 0 | 37.1  | 18 | 37  | 1 | 1224 | 1.57  |
| 2406.107 | 14 | P53814        | K.TTSPPEQESPI TTS[166.9984] 3  | 0.437  | 0.012    | 0.002     | 0 | 25.71 | 19 | 26  | 1 | 917  | 0.66  |
| 2406.107 | 23 | P53814        | K.TTSPPEQESPI TTSPEQES[161 3   | 0.153  | 0.023    | 0.002     | 0 | 22.89 | 19 | 23  | 2 | 917  | 0.66  |
| 1067.483 | 6  | P53999        | R.DDNMFQIGK DDNMFQIGK 2        | 1.965  | 3.30E-05 | 0.002     | 0 | 48.2  | 16 | 48  | 3 | 127  | 1.48  |
| 2645.03  | 8  | P54105        | K.EPVADEEEEPVADDEEEEDS 2       | 0.879  | 4.20E-04 | 0.005     | 0 | 38.34 | 17 | 58  | 3 | 237  | 1.75  |
| 1845.727 | 11 | P54259        | R.SEEISESEEEI SEEIS[166.9984 2 | 1.593  | 7.20E-05 | -0.002    | 0 | 47.48 | 19 | 47  | 1 | 1190 | -1.35 |
| 2630.11  | 29 | P54725        | K.SPSEESAPPTS S[166.9984]PSE 3 | 0.051  | 0.027    | 0.002     | 0 | 20.85 | 18 | 34  | 2 | 363  | 0.83  |
| 3002.275 | 23 | P54725        | R.EDKSPSEESAI EDKSPS[166.99 3  | 0.274  | 0.017    | -0.002    | 1 | 23.06 | 18 | 23  | 3 | 363  | -0.5  |
| 3002.275 | 14 | P54725        | R.EDKSPSEESAI EDKS[166.9984 3  | 1.206  | 0.002    | -0.002    | 1 | 32.42 | 18 | 51  | 4 | 363  | -0.5  |
| 2630.11  | 13 | P54725        | K.SPSEESAPPTS SP[166.9984]E 2  | 0.584  | 7.60E-04 | 0.005     | 0 | 36.42 | 18 | 51  | 4 | 363  | 1.82  |
| 3002.275 | 12 | P54725        | R.EDKSPSEESAI EDKSPSEES[166 3  | 1.204  | 7.30E-04 | -0.002    | 1 | 36.61 | 18 | 37  | 3 | 363  | -0.5  |
| 1962.775 | 11 | P55011        | K.EPFEDGFANC EPFEDGFANGE 2     | 0.559  | 8.30E-04 | -2.00E-04 | 0 | 34.14 | 16 | 34  | 3 | 1212 | -0.1  |
| 1962.775 | 11 | P55011        | K.EPFEDGFANC EPFEDGFANGE 2     | 0.692  | 6.10E-04 | -2.00E-04 | 0 | 35.47 | 16 | 35  | 4 | 1212 | -0.1  |
| 953.603  | 6  | P55060        | K.IIPEIQK.V IIPPEIQK 2         | -0.192 | 0.005    | 0.001     | 0 | 26.63 | 13 | 24  | 1 | 971  | 1.3   |
| 2281.986 | 12 | P55081        | K.IVEPEVVGESI VEPVEVVGES[1 2   | 2.159  | 1.10E-06 | 0.002     | 0 | 65.8  | 19 | 66  | 2 | 439  | 0.96  |
| 2281.986 | 11 | P55081        | K.IVEPEVVGESI VEPVEVVGESD 2    | 1.944  | 9.50E-08 | 0.002     | 0 | 76.45 | 19 | 76  | 2 | 439  | 0.96  |
| 1516.679 | 8  | P55196        | R.SSPNVANQPS SPPNVANQPPS 2     | 2.159  | 2.00E-05 | 0.001     | 0 | 52.75 | 18 | 68  | 4 | 1824 | 0.82  |
| 1197.558 | 6  | P55196        | R.TISNPEVVMK TIS[166.9984]N 2  | 0.316  | 0.002    | 0.001     | 0 | 33.71 | 18 | 68  | 4 | 1824 | 1.18  |
| 1302.573 | 9  | P55196        | R.LFSQGDQVSN LFS[166.9984]C 2  | 1.605  | 8.10E-05 | 0.002     | 0 | 47.58 | 19 | 92  | 3 | 1824 | 1.71  |
| 1936.729 | 15 | P55201        | K.DGQDTSAAEI DGQDTS[166.9 2    | 1.273  | 1.50E-04 | 0.004     | 0 | 44.28 | 19 | 44  | 2 | 1214 | 1.8   |
| 1923.837 | 12 | P55265        | K.TAESQTPPTS TAESQT[181.01 2   | 1.542  | 9.00E-05 | 0.004     | 0 | 45.97 | 18 | 46  | 2 | 1226 | 1.93  |
| 1705.762 | 11 | P55735        | K.GGQSVSASVY GGQSVSASVTE 2     | 1.944  | 1.80E-06 | 6.00E-04  | 0 | 63.93 | 19 | 64  | 1 | 322  | 0.37  |
| 4538.027 | 22 | P55884        | R.TEPAAEAEA TEPAAEAEAAS 4      | 0.293  | 0.016    | 0.006     | 0 | 23.5  | 18 | 24  | 1 | 814  | 1.33  |
| 4538.027 | 16 | P55884        | R.TEPAAEAEA TEPAAEAEAAS 4      | -0.057 | 0.036    | 0.006     | 0 | 20.04 | 18 | 20  | 3 | 814  | 1.33  |
| 4538.027 | 24 | P55884        | R.TEPAAEAEA TEPAAEAEAAS 4      | 0.005  | 0.022    | 0.006     | 0 | 22.26 | 18 | 22  | 3 | 814  | 1.33  |
| 1390.502 | 9  | P56211,04376  | K.YFDSGDYNNM YFDS[166.9984 2   | 2.159  | 6.10E-06 | 0.002     | 0 | 53.61 | 14 | 54  | 2 | 1084 | 2.2   |
| 2630.125 | 11 | P56524        | K.QEPISEDEEE QEPIES[166.99 3   | -0.112 | 0.038    | 0.006     | 1 | 19.22 | 18 | 19  | 2 | 345  | 1.45  |
| 1474.705 | 7  | P57682        | K.RPLPVPSTP RPLPVPES[166.9 2   | -0.938 | 0.025    | 0.002     | 0 | 22.17 | 19 | 22  | 1 | 945  | 1.45  |
| 1472.688 | 6  | P58107        | K.TLDELQSGTT T[181.014]DEI 2   | 2.127  | 2.60E-05 | 0.002     | 0 | 51.82 | 18 | 80  | 4 | 5090 | 1.43  |
| 2075.017 | 19 | P58107,P58107 | R.QVASELHSTS QVS[166.9984 3    | 1.076  | 0.003    | 0.004     | 0 | 31.08 | 18 | 80  | 4 | 5090 | 1.95  |
| 1432.622 | 4  | P58107,P58107 | R.AEAEAGSPRF AEAEAGS[166.1 2   | -1.174 | 0.049    | 0.002     | 0 | 18.82 | 18 | 19  | 1 | 16   | 0.59  |
| 1458.722 | 7  | P60174        | R.HVFGESDELIC HVFGESDELIC 3    | -0.049 | 0.035    | 9.00E-04  | 0 | 20.86 | 19 | 21  | 1 | 286  | 0.59  |
| 1849.844 | 15 | P60468        | M.PGPTPSGTN PGPTPSGTNVG 3      | 1.153  | 0.002    | 0.001     | 1 | 32.85 | 19 | 73  | 3 | 96   | 0.65  |
| 1929.81  | 10 | P60468        | M.PGPTPSGTN PGPTPSGTNVG 2      | -0.303 | 0.006    | 0.003     | 1 | 28.52 | 19 | 73  | 3 | 96   | 1.59  |
| 1849.844 | 12 | P60468        | M.PGPTPSGTN PGPTPSGTNVG 2      | 0.872  | 4.70E-04 | 0.002     | 1 | 39.27 | 18 | 52  | 3 | 96   | 0.92  |
| 1849.844 | 9  | P60468        | M.PGPTPSGTN PGPTPSGT[181 2     | -0.776 | 0.021    | 0.002     | 1 | 22.77 | 18 | 28  | 4 | 96   | 0.92  |
| 1204.482 | 8  | P60468        | R.TTSAGTGGM TTS[166.9984] 2    | -0.958 | 0.032    | 9.00E-04  | 0 | 18.96 | 16 | 46  | 4 | 96   | 0.78  |
| 1544.686 | 7  | P60660        | K.DQGTVEDYVE DQGTVEDYVEG 2     | 2.119  | 1.10E-05 | 0.002     | 0 | 55.43 | 19 | 55  | 1 | 151  | 1.53  |
| 976.448  | 7  | P60709,ASA3E  | K.AGFAGDDAP AGFAGDDAPR 3       | 0.29   | 0.002    | 9.00E-04  | 0 | 34.45 | 19 | 167 | 1 | 0.94 | 0.43  |
| 1516.703 | 14 | P60709,ASA3E  | K.QEYDESGPSV QEYDESGPSVH 3     | 1.275  | 0.002    | 6.00E-04  | 0 | 34.07 | 19 | 167 | 1 | 0.94 | 0.43  |
| 1870.858 | 7  | P60709,ASA3E  | K.SYELPDGQVIT SYELPDGQVIT 2    | 0.169  | 0.002    | 0.003     | 0 | 33.24 | 19 | 167 | 1 | 1.43 | 1.39  |
| 1790.892 | 18 | P60709,ASA3E  | K.SYELPDGQVIT SYELPDGQVIT 2    | 0.32   | 0.002    | 0.002     | 0 | 33.75 | 18 | 167 | 1 | 1.43 | 1.39  |
| 1161.618 | 5  | P60709,P6273E | K.EITALAPSTMI EITALAPSTMK 2    | 0.111  | 0.002    | 0.001     | 0 | 29.66 | 16 | 167 | 1 | 1.07 | 2.06  |
| 1198.522 | 9  | P60709,P6273E | K.DSYVGDQEAQ DSYVGDQEAQSK 2    | 2.119  | 5.40E-06 | 0.002     | 0 | 58.56 | 18 | 226 | 6 | 167  | 1.31  |
| 998.486  | 5  | P60709,P6273E | R.DLTDYLMK I DLTDYLMK 2        | 0.579  | 9.20E-04 | 0.001     | 0 | 34.34 | 16 | 167 | 1 | 1.31 | 0.95  |
| 1132.527 | 7  | P60709,P6326J | R.GYSFTTAAER GYSFTTAAER 2      | -0.291 | 0.006    | 0.002     | 0 | 27.62 | 18 | 168 | 1 | 1.7  | 1.36  |
| 1954.064 | 9  | P60709,P6326J | R.VAPEEHPVLL VAPEEHPVLLTE 3    | 0.212  | 0.021    | 0.003     | 0 | 17.44 | 13 | 167 | 1 | 1.7  | 1.36  |
| 1169.584 | 7  | P60842        | K.DQYDIFQK L DQYDIFQK 2        | 0.069  | 0.003    | 0.002     | 0 | 31.24 | 18 | 31  | 1 | 406  | 0.87  |
| 1539.66  | 10 | P60981        | K.HECOANGPEI HEC[160.0307] 2   | -0.739 | 0.017    | 0.001     | 0 | 24.16 | 19 | 24  | 2 | 165  | 0.87  |
| 1370.551 | 6  | P61247        | R.ADGYEPPVQI ADGYEPPVQES 2     | -0.876 | 0.023    | 0.002     | 0 | 20.79 | 17 | 21  | 1 | 264  | 1.42  |
| 1411.592 | 5  | P61247        | K.LMELHGEQSS LMELHGEQSSS 2     | -0.828 | 0.021    | 0.001     | 0 | 23.25 | 19 | 23  | 2 | 264  | 0.94  |
| 1922.838 | 16 | P61966        | K.AIEQADLQEI AIEQADLQEEC 2     | -1.121 | 0.039    | 0.001     | 0 | 20.34 | 19 | 20  | 1 | 158  | 0.7   |
| 1078.355 | 4  | P61978        | R.DYDDMSPR.F DYDDMS[166.9 2    | -0.331 | 0.006    | 0.001     | 0 | 22.24 | 13 | 80  | 6 | 463  | 1.11  |
| 1234.456 | 8  | P61978        | R.RDYDDMSPR RDYDDMS[166. 2     | -0.203 | 0.005    | 7.00E-04  | 1 | 25.52 | 15 | 121 | 7 | 463  | 0.59  |
| 1106.515 | 5  | P61978        | R.NTDEMVELR NTDEMVELR 2        | 0.628  | 7.50E-04 | 9.00E-04  | 0 | 36.83 | 18 | 80  | 6 | 463  | 0.76  |
| 1579.706 | 11 | P61978        | K.RPAEMEEER RPAEMEEEQ/ 3       | 0.551  | 0.01     | 1.00E-04  | 0 | 23.83 | 16 | 121 | 7 | 463  | 0.09  |
| 1780.798 | 8  | P61978        | R.TDYNASVSP TDYNASVSPD/ 2      | -0.19  | 0.005    | 0.002     | 0 | 28.65 | 18 | 121 | 7 | 463  | 0.95  |
| 2193.88  | 15 | P61981        | R.DNLTWTSQI DNLTWTSQDC 2       | 2.159  | 1.20E-06 | 0.003     | 0 | 63.76 | 17 | 126 | 5 | 247  | 1.45  |
| 1643.787 | 10 | P61981        | K.NVTLENEPSI NVTLENEPSNE 2     | 2.159  | 5.30E-07 | 0.002     | 0 | 67.54 | 17 | 126 | 5 | 247  | 1.05  |
| 907.525  | 5  | P61981,P2734E | R.NLLSVAYK.N NLLSVAYK 2        | -0.794 | 0.019    | 5.00E-04  | 0 | 21.62 | 17 | 138 | 1 | 523  | 1.21  |
| 1909.815 | 9  | P62070        | K.FQEQCPSPP FQEQC[160.0: 3     | 0.022  | 0.031    | 0.002     | 1 | 21.54 | 19 | 37  | 4 | 204  | 0.99  |
| 1781.72  | 16 | P62070        | K.FQEQCPSPP FQEQC[160.0: 2     | 0.278  | 0.002    | 0.002     | 0 | 33.33 | 18 | 37  | 4 | 204  | 1.21  |
| 1909.815 | 13 | P62070        | R.KFQEQCPSPP KFQEQC[160.( 3    | -0.133 | 0.043    | 0.002     | 1 | 20.01 | 19 | 36  | 4 | 204  | 1.21  |
| 1909.815 | 10 | P62070        | K.FQEQCPSPP FQEQC[160.0: 3     | 0.094  | 0.026    | 0.002     | 1 | 22.29 | 19 | 64  | 5 | 204  | 1.21  |
| 1909.815 | 14 | P62070        | R.KFQEQCPSPP KFQEQC[160.( 2    | -0.73  | 0.016    | 0.002     | 1 | 24.24 | 19 | 48  | 5 | 204  | 0.9   |
| 1265.612 | 8  | P62158        | K.DGNGVISAEE DGNGVISAEEI 2     | 2.159  | 2.00E-05 | 0.002     | 0 | 52.7  | 18 | 63  | 3 | 149  | 1.16  |
| 1596.714 | 9  | P62158        | K.DTDSSEEEIRE# DTDSSEEEIREAF 3 | 0.188  | 0.022    | 0.001     | 1 | 22.2  | 18 | 63  | 3 | 149  | 0.88  |
| 956.472  | 5  | P62158,P2748E | K.EAFSLFK.D EAFSLFK 2          | -0.534 | 0.011    | 0.001     | 0 | 22.21 | 15 | 63  | 3 | 149  | 1.29  |
| 1289.549 | 10 | P62258        | K.EALQDVEDEN EALQDVEDENC 2     | 2.119  | 4.30E-06 | 0.001     | 0 | 58.75 | 18 | 60  | 3 | 255  | 1.12  |
| 2180.94  | 12 | P62258        | R.DNLTWTSQI DNLTWTSQNM/ 2      | 1.944  | 5.30E-06 | 0.002     | 0 | 59.04 | 19 | 115 | 4 | 255  | 0.71  |
| 1509.683 | 6  | P62263        | R.IEDVTPSPDS IEDVTPSPDST[ 2    | 1.769  | 5.10E-05 | 0.002     | 0 | 48.24 | 18 | 48  | 1 | 151  | 1.63  |
| 1509.683 | 7  | P62263        | R.IEDVTPSPDS IEDVTPSPDS[1 2    | 2.127  | 3.20E-06 | 0.002     | 0 | 60.25 | 18 | 60  | 1 | 151  | 1.63  |
| 1403.676 | 11 | P62269        | K.RAGELTEDEV RAGELTEDEVEI 3    | 0.632  | 0.007    | 7.00E-04  | 1 | 26.67 | 18 | 27  | 1 | 152  | 0.51  |
| 1207.515 | 12 | P62491,Q1590  | R.DDEYDYLFK.D DDEYDYLFK 2      | -0.508 | 0.01     | 0.002     | 0 | 24.47 | 17 | 24  | 1 | 162  | 1.62  |
| 1775.642 | 12 | P62633        | K.DCDLQEDACI DC[160.0307]D 2   | 2.159  | 3.00E-08 | 6.00E-04  | 0 | 75.66 | 13 | 76  | 1 | 177  | 0.34  |
| 1057.519 | 4  | P62750        | K.IRTSPTR.R IRTS[166.9984] 2   | -1.047 | 0.037    | 0.001     | 1 | 20.08 | 18 | 40  | 2 | 156  | 0.94  |
| 1404.701 | 8  | P62750        | R.LAPDYDALDV LAPDYDAL          |        |          |           |   |       |    |     |   |      |       |

|          |    |              |                                |        |          |           |   |       |    |     |    |      |       |
|----------|----|--------------|--------------------------------|--------|----------|-----------|---|-------|----|-----|----|------|-------|
| 1747.632 | 8  | P67809       | K.NEGSESAPG NEGS[166.998] 2    | 0.217  | 0.002    | 0.003     | 0 | 27.72 | 13 | 341 | 14 | 324  | 1.61  |
| 1667.666 | 12 | P67809       | K.NEGSESAPG NEGS[166.99] 2     | 2.159  | 1.40E-07 | 0.003     | 0 | 72.36 | 16 | 371 | 13 | 324  | 2     |
| 1768.681 | 12 | P67809       | R.NYQQNYQNS NYQQNYQNS[1 2      | -0.055 | 0.004    | 0.001     | 0 | 28    | 16 | 371 | 13 | 324  | 0.7   |
| 1688.715 | 11 | P67809       | R.NYQQNYQNS NYQQNYQNS[1 2      | 2.172  | 1.90E-07 | 0.001     | 0 | 71.74 | 17 | 324 | 10 | 324  | 0.69  |
| 1897.805 | 10 | P67809       | K.AADPPAENS AADPPAENSSA 2      | 0.385  | 0.001    | 0.001     | 0 | 34.4  | 18 | 371 | 13 | 324  | 0.7   |
| 1667.666 | 9  | P67809       | K.NEGSESAPG NEGS[166.998] 2    | 2.172  | 1.30E-06 | 0.003     | 0 | 62.54 | 16 | 324 | 10 | 324  | 2     |
| 1977.771 | 18 | P67809       | K.AADPPAENS AADPPAENSS[1 2     | 2.127  | 1.30E-06 | 0.002     | 0 | 62.5  | 16 | 358 | 11 | 324  | 0.96  |
| 1768.681 | 13 | P67809       | R.NYQQNYQNS NYQQNYQNS[1 2      | 0.706  | 6.40E-04 | 0.003     | 0 | 35.64 | 16 | 293 | 13 | 324  | 1.6   |
| 1614.772 | 19 | P67936       | K.IQALQQQADI IQALQQQADEA 2     | 2.119  | 1.90E-06 | 0.001     | 0 | 63.21 | 18 | 73  | 2  | 248  | 0.76  |
| 1243.653 | 8  | P67936,P0675 | R.IQLVEELDR.IQLVEELDR 2        | -0.21  | 0.005    | 0.001     | 0 | 26.45 | 16 | 73  |    |      | 1.02  |
| 975.551  | 9  | P68104,Q0563 | R.LPLQDVYK.LPLQDVYK 2          | -0.145 | 0.004    | 0.001     | 0 | 26.1  | 15 | 86  |    |      | 1.18  |
| 1025.61  | 8  | P68104,Q0563 | K.IGGIGTVPVGI IGGIGTVPVGR 2    | 2.119  | 3.60E-07 | 7.00E-04  | 0 | 65.41 | 13 | 99  |    |      | 0.66  |
| 914.567  | 4  | P68104,Q0563 | R.QTVAVGVK.QTVAVGVK 2          | 0.105  | 0.002    | 6.00E-04  | 0 | 31.61 | 18 | 95  |    |      | 0.71  |
| 1161.591 | 6  | P78312       | K.LVLAESPQK.LVLAES[166.99] 2   | -0.636 | 0.015    | 7.00E-04  | 0 | 25.17 | 19 | 25  | 3  | 1265 | 0.61  |
| 1767.704 | 14 | P78316       | K.RFGEYNSNM RFGEYNSNMS[ 2      | 0.466  | 0.001    | 0.002     | 1 | 33.21 | 16 | 60  | 3  | 857  | 1.16  |
| 1611.603 | 6  | P78316       | R.FGEYNSNMS FGEYNSNMS[1] 2     | 1.55   | 9.70E-05 | 0.002     | 0 | 42.05 | 14 | 60  | 3  | 857  | 1.4   |
| 1644.646 | 9  | P78316       | K.MNVEEDVQE MNVEEDVQEE[ 2      | -0.92  | 0.024    | 0.002     | 0 | 20.38 | 17 | 91  | 3  | 857  | 0.89  |
| 3284.365 | 20 | P78332       | R.EGETQGVAFI EGETQGVAFEH 3     | 1.291  | 3.40E-04 | 0.002     | 0 | 40.24 | 18 | 40  | 1  | 1123 | 0.74  |
| 875.348  | 4  | P78344       | R.FSPTMGR.H FS[166.9984]PT 2   | -0.869 | 0.021    | -2.00E-04 | 0 | 16.86 | 13 | 17  | 1  | 907  | -0.24 |
| 1865.81  | 12 | P78346       | K.KPRPSEGED KPRPS[166.998 3    | 1.224  | 2.70E-04 | 0.002     | 0 | 41.5  | 18 | 47  | 2  | 268  | 0.81  |
| 1352.628 | 8  | P78347       | R.SILSPGSGCG SILS[166.9984] 2  | -0.439 | 0.009    | 0.002     | 0 | 26.16 | 18 | 26  | 1  | 998  | 1.65  |
| 1220.652 | 6  | P78386       | R.ATAENEFVWL ATAENEFVWLK 2     | 0.555  | 9.20E-04 | 0.001     | 0 | 36.05 | 18 | 36  | 1  | 507  | 1.14  |
| 1628.578 | 13 | P78504       | R.THNSEVEDC THNS[166.9984] 2   | 2.197  | 1.80E-05 | 0.002     | 0 | 47.82 | 13 | 48  | 1  | 1218 | 1.31  |
| 2394.976 | 12 | P78527       | K.LTLPEDNSM LTPEDNS[166 2      | 2.159  | 4.60E-06 | 0.002     | 0 | 58.84 | 18 | 88  | 5  | 4128 | 0.82  |
| 1496.642 | 7  | P78536       | K.SFEDLTHPV S[166.9984]FE 2    | 1.654  | 6.80E-05 | 0.002     | 0 | 47.09 | 18 | 47  | 1  | 824  | 1.39  |
| 1466.641 | 14 | P80723       | K.PTAAATEAPS ETPAAATEAPST 2    | -0.947 | 0.027    | -2.00E-04 | 0 | 22.08 | 19 | 22  | 1  | 227  | -0.15 |
| 1485.605 | 9  | P81274       | R.RHSMENMEL RHS[166.9984] 3    | 1.291  | 7.70E-04 | 7.00E-04  | 1 | 35.98 | 17 | 36  | 1  | 684  | 0.5   |
| 3092.449 | 19 | P82094       | R.SATPVNCEOF S[166.9984]ATI 3  | -0.096 | 0.037    | 0.004     | 0 | 20.36 | 19 | 39  | 6  | 1093 | 1.37  |
| 1559.647 | 8  | P82094       | R.SVSEINSDDEL SVSEINS[166.99 2 | 0.091  | 0.002    | 9.00E-04  | 0 | 30.44 | 17 | 47  | 6  | 1093 | 0.56  |
| 3092.449 | 15 | P82094       | R.SATPVNCEOF SAT[181.014]PI 3  | 0.237  | 0.017    | 0.004     | 0 | 23.71 | 19 | 44  | 3  | 1093 | 1.37  |
| 1532.699 | 8  | P82094       | K.SNTEPQSPPIA SNTEPQSPPIAS 2   | -1.114 | 0.042    | 0.001     | 0 | 20.4  | 19 | 43  | 8  | 1093 | 0.91  |
| 875.45   | 6  | P84077,P6120 | K.LGLHSR.H LGLHS[166.998 2     | 0.54   | 9.00E-04 | 5.00E-04  | 0 | 34.95 | 17 | 35  |    |      | 0.62  |
| 1630.774 | 9  | P84077,P6120 | K.QDLPNAMNA QDLPNAMNAA 2       | 1.56   | 8.00E-05 | 0.002     | 0 | 47.16 | 19 | 47  |    |      | 1.3   |
| 1964.743 | 8  | P84157       | K.GPSSGPEEEI GPS[166.9984] 2   | 1.869  | 3.80E-05 | 0.002     | 0 | 48.24 | 17 | 48  | 1  | 204  | 1.21  |
| 1964.743 | 10 | P84157       | K.GPSSGPEEEI GPS[166.9984] 2   | 2.021  | 3.20E-06 | 0.002     | 0 | 59.05 | 17 | 59  | 1  | 204  | 1.21  |
| 2942.243 | 20 | P85037       | R.SGGLQTPCEL SGGGLQTPEC[16 3   | 0.252  | 0.017    | 0.001     | 1 | 23.84 | 19 | 33  | 5  | 733  | 0.46  |
| 2266.092 | 10 | P85037       | K.EEAPASPLRPI EEAPAS[166.99 3  | 0.56   | 0.009    | 0.004     | 0 | 24.92 | 17 | 33  | 5  | 733  | 1.96  |
| 1384.593 | 11 | P85037       | R.SGGLQTPCEL SGGGLQTPEC[16 2   | -0.986 | 0.032    | 0.001     | 0 | 19.69 | 17 | 33  | 5  | 733  | 0.9   |
| 1576.668 | 11 | P85037       | R.EGSPHPDPEI EGS[166.9984] 2   | -1.121 | 0.04     | 0.002     | 0 | 19.32 | 18 | 36  | 6  | 733  | 1.32  |
| 1694.782 | 18 | P86452       | R.SESPVAEQ SES[166.9984]F 2    | -0.343 | 0.007    | 0.002     | 0 | 27.12 | 18 | 27  | 1  | 979  | 1.48  |
| 1694.782 | 18 | P86452       | R.SESPVAEQ S[166.9984]EF 2     | 0.187  | 0.002    | 0.002     | 0 | 32.4  | 18 | 32  | 1  | 979  | 1.48  |
| 1290.584 | 8  | P98175       | K.LASDDRPSPPI LASDDRPS[166. 2  | -0.086 | 0.004    | -2.00E-04 | 0 | 30.69 | 19 | 93  | 2  | 930  | -0.14 |
| 1562.71  | 10 | P98175       | R.AHLSENELEA AHLHS[166.9984 2  | 2.159  | 1.70E-06 | 0.002     | 0 | 64.8  | 20 | 96  | 3  | 930  | 1.52  |
| 1859.795 | 12 | Q00341       | K.VATLNSEESI VATLNS[166.99 2   | 1.616  | 7.90E-05 | 0.002     | 0 | 47.71 | 19 | 48  | 1  | 1268 | 0.8   |
| 1921.877 | 19 | Q00341       | K.DDGNQPDQC DDGNQPDQCI 2       | -1.208 | 0.046    | 5.00E-04  | 0 | 18.45 | 18 | 42  | 3  | 1268 | 0.26  |
| 928.432  | 5  | Q00536       | R.QLSMTRL.G QLS[166.9984] 2    | -1.116 | 0.044    | 7.00E-04  | 0 | 18.39 | 17 | 18  | 1  | 496  | 0.8   |
| 1185.533 | 5  | Q00537       | R.RISMEDLNK.RIS[166.9984]N 2   | -0.66  | 0.014    | 0.002     | 1 | 22.95 | 17 | 18  | 2  | 523  | 1.34  |
| 2837.124 | 22 | Q00537       | K.MGSDGSDO MGSDGSDQDA 3        | 1.291  | 0.001    | 0.003     | 0 | 33.48 | 17 | 39  | 2  | 523  | 0.93  |
| 1244.603 | 8  | Q00537       | R.RASLSIEFGH RAS[166.9984] 2   | -1.06  | 0.036    | 0.001     | 1 | 20.95 | 19 | 37  | 3  | 523  | 1.16  |
| 1160.546 | 8  | Q00587       | R.RSDLSLFR.L RSDS[166.9984 2   | 1.631  | 6.80E-05 | 9.00E-04  | 1 | 46.86 | 18 | 70  | 2  | 391  | 0.74  |
| 1004.445 | 6  | Q00587       | R.SDLSLFR.L SDS[166.9984] 2    | 1.025  | 2.70E-04 | 7.00E-04  | 0 | 41.8  | 19 | 70  | 2  | 391  | 0.66  |
| 1334.633 | 12 | Q00610       | K.IYIDNSNNPEF IYIDNSNNPER 2    | -0.61  | 0.013    | 0.002     | 0 | 24.45 | 18 | 24  | 1  | 1675 | 1.59  |
| 2167.966 | 9  | Q00613       | R.GHTDTEGRPI GHTDTEGRPPS 3     | 0.248  | 0.017    | 0.002     | 0 | 23.8  | 19 | 24  | 3  | 529  | 0.98  |
| 2247.932 | 19 | Q00613       | R.GHTDTEGRPI GHTDTEGRPPS 2     | -0.778 | 0.02     | 0.001     | 0 | 22.76 | 18 | 30  | 4  | 529  | 0.53  |
| 1380.523 | 6  | Q00613       | K.EEPPSPQSPF EEPPS[166.998 2   | -0.651 | 0.014    | 8.00E-04  | 0 | 22.02 | 16 | 22  | 7  | 529  | 0.56  |
| 3206.406 | 25 | Q00839       | R.LQAALDDEEA LQAALDDEEAG 3     | 1.291  | 1.90E-06 | 0.001     | 0 | 63.68 | 19 | 82  | 3  | 825  | 0.36  |
| 1291.584 | 7  | Q00839       | R.GYFYEIENK.GYFYEIENK 2        | 0.707  | 6.40E-04 | 0.002     | 0 | 36.62 | 17 | 82  | 3  | 825  | 1.8   |
| 1559.65  | 9  | Q01082       | K.NEIDNVEEDY NEIDNVEEDYQI 2    | -0.226 | 0.006    | 0.002     | 0 | 27.29 | 17 | 70  | 7  | 2364 | 1.1   |
| 1833.813 | 16 | Q01082       | K.GEQVSONGLI GEQVSONGLIPA 3    | 1.291  | 8.20E-04 | 0.002     | 0 | 35.28 | 17 | 70  | 7  | 2364 | 0.94  |
| 1432.539 | 6  | Q01082       | K.ESSPIPSPSDI ESS[166.9984]F 2 | -1.087 | 0.035    | 0.002     | 0 | 17.68 | 16 | 70  | 7  | 2364 | 1.07  |
| 1432.539 | 8  | Q01082       | K.ESSPIPSPSDI ESS[166.9984]F 2 | -0.002 | 0.003    | 0.002     | 0 | 26.53 | 14 | 70  | 7  | 2364 | 1.76  |
| 1560.634 | 8  | Q01082       | K.ESSPIPSPSDI ESS[166.9984]F 2 | -0.015 | 0.003    | 0.004     | 1 | 29.4  | 17 | 70  | 7  | 2364 | 2.35  |
| 1432.539 | 8  | Q01082       | K.ESSPIPSPSDI ES[166.9984]SF 2 | 0.706  | 6.30E-04 | 0.002     | 0 | 33.64 | 14 | 69  | 7  | 2364 | 1.76  |
| 1203.596 | 5  | Q01082       | R.DQNTVETLQF DQNTVETLQR 2      | -1.066 | 0.036    | 0.002     | 0 | 20.92 | 19 | 69  | 7  | 2364 | 1.24  |
| 2195.021 | 15 | Q01105       | K.EQEQAEIHDI EQEQAEIHDEIV 3    | 1.291  | 4.60E-04 | 0.003     | 0 | 40.17 | 19 | 63  | 2  | 290  | 1.52  |
| 1353.63  | 14 | Q01105       | R.LNEQASEEIK LNEQAS[166.99 2   | 1.043  | 3.00E-04 | 0.002     | 0 | 41.98 | 19 | 63  | 2  | 290  | 1.33  |
| 1754.8   | 13 | Q01167       | R.EGSPAPLEPEI EGS[166.9984] 2  | 1.297  | 1.70E-04 | 0.002     | 0 | 43.52 | 18 | 44  | 1  | 660  | 0.84  |
| 1518.675 | 6  | Q01196       | R.RFTPPSTALSF RFT[181.014]PI 2 | -0.74  | 0.018    | 0.002     | 1 | 23.14 | 18 | 23  | 2  | 453  | 0.97  |
| 1781.77  | 11 | Q01650       | K.SADGAPAGI S[166.9984]AD 2    | 2.159  | 7.50E-08 | -1.00E-04 | 0 | 75.33 | 17 | 75  | 1  | 507  | -0.03 |
| 1272.587 | 8  | Q01664       | R.FIQELSGSPK FIQELSGSS[166 2   | 0.971  | 3.40E-04 | 0.002     | 0 | 40.26 | 18 | 77  | 2  | 338  | 1.3   |
| 1669.663 | 10 | Q01664       | K.DEGIGSPDIW DEGIGS[166.99 2   | 2.159  | 9.00E-06 | 7.00E-04  | 0 | 54.17 | 16 | 77  | 2  | 338  | 0.43  |
| 1829.744 | 5  | Q01804       | K.EESSEDENEV.EESS[166.9984] 2  | 0.009  | 0.009    | 0.002     | 0 | 25.03 | 17 | 34  | 2  | 1113 | 1.19  |
| 1829.744 | 11 | Q01804       | K.EESSEDENEV.EES[166.9984]S 2  | -0.57  | 0.011    | 0.002     | 0 | 23.85 | 17 | 24  | 2  | 1113 | 1.19  |
| 1507.61  | 6  | Q01804       | R.ESNYFGLSPEI ESNYFGLS[166. 2  | -0.354 | 0.007    | 0.002     | 0 | 25.01 | 16 | 34  | 2  | 1113 | 1.5   |
| 1194.519 | 7  | Q01813       | R.SFAGNLNTYK S[166.9984]FA 2   | -0.272 | 0.006    | 0.001     | 0 | 27.88 | 18 | 28  | 2  | 784  | 1.21  |
| 1837.822 | 7  | Q01814       | K.SATSSSPGSP SATSSSPGSPH[ 2    | -0.937 | 0.03     | 0.002     | 0 | 22.18 | 19 | 22  | 1  | 1243 | 1.3   |
| 1040.441 | 6  | Q01970       | K.SLGDGLNRC S[166.9984]LGI 2   | 0.323  | 0.002    | 0.001     | 0 | 32.77 | 17 | 33  | 1  | 1234 | 1.34  |
| 2327.937 | 18 | Q02078       | R.GCDSPDPDTS GC[160.0307]D 3   | 0.123  | 0.023    | 0.003     | 0 | 23.57 | 20 | 24  | 1  | 507  | 1.17  |
| 2044.893 | 13 | Q02241       | K.YMLTHQELAS YMLTHQELAS[1 3    | 0.153  | 0.022    | 0.002     | 0 | 22.85 | 19 | 64  | 3  | 960  | 0.99  |
| 2569.12  | 15 | Q02241       | R.RSSTVAPAQR RS[166.9984]S 3   | 1.291  | 3.60E-06 | 0.002     | 1 | 59.77 | 18 | 64  | 3  | 960  | 0.81  |
| 2569.12  | 22 | Q02241       | R.RSSTVAPAQR RS[181.014]V 3    | 1.127  | 3.00E-05 | 0.002     | 1 | 50.55 | 18 | 62  | 3  | 960  | 0.81  |
| 2413.019 | 8  | Q02241       | R.SSTVAPAQRD SST[181.014]V 2   | -0.141 | 0.004    | 0.004     | 0 | 30.14 | 19 | 62  | 3  | 960  | 1.57  |
| 2413.019 | 10 | Q02241       | R.SSTVAPAQRD S[166.9984]STV 2  | 1.533  | 8.60E-05 | 0.004     | 0 | 46.87 | 19 | 93  | 4  | 960  | 1.57  |
| 1893.761 | 10 | Q02410       | R.SNSQENVEAS SNS[166.9984] 2   | -0.261 | 0.006    | 0.003     | 0 | 26.93 | 17 | 27  | 1  | 837  | 1.41  |
| 2578.054 | 11 | Q02446       | K.ENNVSQPASS ENNVSQPASS[ 3     | -0.143 | 0.047    | 0.004     | 0 | 18.91 | 18 | 19  | 3  | 784  | 1.73  |
| 1405.524 | 9  | Q02487       | R.GSVAGSVGCI GS[166.9984]V 2   | 0.594  | 7.80E-04 | 0.002     | 0 | 31.49 | 13 | 31  | 2  | 901  | 1.07  |
| 1405.524 | 8  | Q02487       | R.GSVAGSVGCI GSVAGSVGCI 2      | -1.035 | 0.032    | 0.001     | 0 | 15.2  | 13 | 34  | 2  | 901  | 0     |

|          |    |              |                               |   |        |          |           |   |       |    |     |    |      |       |
|----------|----|--------------|-------------------------------|---|--------|----------|-----------|---|-------|----|-----|----|------|-------|
| 1560.617 | 5  | Q03164       | K.AQGOESDSE AQGOESDS[164      | 2 | -0.735 | 0.015    | 0.003     | 0 | 21.2  | 16 | 79  | 4  | 3969 | 1.77  |
| 2101.918 | 5  | Q03164       | R.SREDSPELNPI SREDS[166.998   | 3 | 0.011  | 0.034    | -0.001    | 1 | 23.45 | 21 | 39  | 8  | 3969 | -0.66 |
| 1560.617 | 5  | Q03164       | K.AQGOESDSE AQGOESDS[16       | 2 | -0.358 | 0.006    | 0.003     | 0 | 24.97 | 16 | 60  | 7  | 3969 | 1.77  |
| 1843.767 | 6  | Q03188       | R.CSLEPESLEDE [160.0307]S[1   | 2 | 0.032  | 0.003    | 0.002     | 0 | 30.87 | 19 | 31  | 3  | 943  | 1.32  |
| 1204.572 | 9  | Q03252       | R.AGGPATPLSP AGGPATPLS[16     | 2 | -0.164 | 0.005    | 0.002     | 0 | 29.89 | 19 | 30  | 4  | 600  | 1.35  |
| 1204.572 | 11 | Q03252       | R.AGGPATPLSP AGGPATPLSP[2     | 2 | -1.194 | 0.049    | 0.002     | 0 | 19.61 | 19 | 20  | 7  | 600  | 1.35  |
| 1348.574 | 9  | Q03252       | R.ATSSSGSLSA ATS[166.9984]I   | 2 | 1.971  | 3.60E-05 | 0.002     | 0 | 50.24 | 18 | 51  | 5  | 600  | 1.47  |
| 3132.142 | 15 | Q03701       | R.SQLDDHPESD SQLDDHPES[16     | 3 | 1.291  | 4.50E-04 | 0.001     | 0 | 37.06 | 16 | 37  | 1  | 1054 | 0.44  |
| 1198.524 | 7  | Q04637       | K.AALSEEELEKI AALS[166.9984   | 2 | 0.986  | 2.90E-04 | 0.002     | 0 | 41.39 | 19 | 82  | 6  | 1599 | 1.39  |
| 1561.637 | 14 | Q04637,O4343 | K.NHDEESLECLI NHDEESLEC[16    | 2 | -0.018 | 0.003    | 0.003     | 0 | 28.35 | 16 | 82  | 2  | 2.02 | 2.02  |
| 1896.775 | 18 | Q04721       | K.AEDEALLSEEL AEDEALLS[166.   | 2 | 0.54   | 8.30E-04 | 0.002     | 0 | 35.95 | 18 | 36  | 1  | 2471 | 1.11  |
| 1821.775 | 10 | Q04724       | K.DASSSPASTA; DASS[166.998    | 2 | 0.538  | 8.30E-04 | 0.002     | 0 | 35.93 | 18 | 36  | 1  | 770  | 1.07  |
| 1821.775 | 13 | Q04724       | K.DASSSPASTA; DAS[166.9984]   | 2 | 0.34   | 0.001    | 0.002     | 0 | 33.96 | 18 | 34  | 1  | 770  | 1.07  |
| 1843.796 | 14 | Q04726       | K.DAPTPASVA DAPTS[166.998     | 2 | 2.159  | 3.40E-07 | 0.002     | 0 | 70.51 | 18 | 117 | 6  | 772  | 1.14  |
| 1643.691 | 11 | Q04726       | R.ESSANNVSP ESSANNVS[16       | 2 | 2.159  | 1.20E-06 | 0.004     | 0 | 63.56 | 17 | 117 | 6  | 772  | 2.19  |
| 1928.834 | 9  | Q04726       | R.ERESSANNV ERESSANNVS[2      | 2 | -0.713 | 0.017    | 0.001     | 1 | 24.42 | 19 | 24  | 2  | 772  | 2.19  |
| 2121.884 | 7  | Q04917       | R.DNLTLWTSDC DNLTLWTSDC[2     | 2 | -0.005 | 0.003    | 0.001     | 0 | 30.5  | 18 | 30  | 2  | 246  | 0.51  |
| 1216.536 | 7  | Q05209       | K.SFDGNTLNR S[166.9984]FDX    | 2 | 0.398  | 0.001    | 0.002     | 0 | 35.53 | 19 | 83  | 4  | 780  | 2.07  |
| 930.433  | 5  | Q05209       | R.NLSFEIK NLS[166.9984]I      | 2 | -0.629 | 0.015    | 5.00E-04  | 0 | 25.26 | 19 | 83  | 4  | 780  | 0.54  |
| 1731.747 | 10 | Q05209       | K.DVDVSEDSPP DVDVSEDS[166     | 2 | 2.159  | 1.40E-05 | 0.002     | 0 | 53.91 | 18 | 83  | 4  | 780  | 1.16  |
| 2367.985 | 9  | Q05209       | K.VSVTPPEESQI VSVT[181.014]   | 3 | 0.039  | 0.028    | 0.003     | 0 | 20.74 | 18 | 100 | 4  | 780  | 1.11  |
| 1825.568 | 5  | Q05519       | K.VNGDDHHEE VNGDDHHEED[1      | 2 | 0.416  | 0.001    | 0.002     | 0 | 29.71 | 13 | 51  | 2  | 484  | 0.93  |
| 1686.569 | 11 | Q05519       | R.DYDEEEQGYI DYDEEEQGYD[2     | 2 | 0.832  | 4.50E-04 | 0.002     | 0 | 33.87 | 13 | 51  | 2  | 484  | 0.93  |
| 2036.896 | 5  | Q05655       | R.RSDSASSEPV RS[166.9984]D;   | 2 | -0.864 | 0.022    | 0.002     | 1 | 21.91 | 18 | 63  | 5  | 676  | 0.95  |
| 2036.896 | 12 | Q05655       | R.RSDSASSEPV RSDSAS[166.99    | 3 | 1.291  | 0.002    | 0.002     | 1 | 33.38 | 18 | 63  | 5  | 676  | 1.14  |
| 1880.795 | 15 | Q05655       | R.SDSASSEPV S[166.9984]D;     | 2 | 1.289  | 1.50E-04 | 0.003     | 0 | 44.44 | 19 | 63  | 5  | 676  | 1.56  |
| 1880.795 | 12 | Q05655       | R.SDSASSEPV S[166.9984]D;     | 2 | -0.512 | 0.009    | 0.003     | 0 | 26.43 | 19 | 37  | 3  | 676  | 1.56  |
| 1880.795 | 10 | Q05655       | R.SDSASSEPV S[166.9984]D;     | 2 | -1.007 | 0.035    | -7.00E-04 | 0 | 21.47 | 19 | 89  | 6  | 676  | -0.35 |
| 2036.896 | 9  | Q05655       | R.RSDSASSEPV RSDS[166.9984    | 3 | 0.127  | 0.023    | 0.002     | 1 | 21.62 | 18 | 60  | 3  | 676  | 1.14  |
| 1809.7   | 15 | Q05655       | K.TGVAGEDMTC TGVAGEDMQD[2     | 2 | 1.165  | 2.20E-04 | 8.00E-04  | 0 | 39.19 | 15 | 111 | 7  | 676  | 0.44  |
| 1335.558 | 6  | Q05032       | K.LEDNPPSGSPI LEDNPPSGS[16]   | 2 | 1.292  | 1.60E-04 | 0.002     | 0 | 44.47 | 19 | 108 | 4  | 466  | 1.85  |
| 2054.891 | 9  | Q05032       | K.NGTSGSDSPC NGTSGSDS[166     | 2 | 0.614  | 7.10E-04 | -3.00E-04 | 0 | 36.69 | 18 | 108 | 4  | 466  | -0.14 |
| 2058.859 | 11 | Q05032       | K.SQVNGEAGS S[166.9984]QV     | 2 | 2.159  | 1.40E-06 | 0.002     | 0 | 63.16 | 17 | 108 | 4  | 466  | 0.81  |
| 2054.891 | 12 | Q05032       | K.NGTSGSDSPC NGTSGS[166.9     | 2 | 1.279  | 1.50E-04 | -3.00E-04 | 0 | 43.33 | 18 | 122 | 5  | 466  | -0.14 |
| 1335.558 | 7  | Q05032       | K.LEDNPPSGSPI LEDNPS[166.99   | 2 | 1.075  | 2.60E-04 | 0.002     | 0 | 42.28 | 19 | 123 | 4  | 466  | 1.85  |
| 1604.691 | 10 | Q06210       | R.VDSTTCLFVPI VDS[166.9984]   | 2 | -1.13  | 0.046    | 0.002     | 0 | 18.23 | 17 | 18  | 3  | 699  | 1.39  |
| 1458.613 | 20 | Q06210       | R.GYDSAGVGI GYDSAGVGFDC[2     | 2 | 1.713  | 5.80E-05 | 0.002     | 0 | 46.68 | 17 | 63  | 3  | 699  | 1.16  |
| 1283.54  | 8  | Q06265       | K.APIDTSDVEE APIDTS[166.99;   | 2 | 2.119  | 1.80E-05 | 0.002     | 0 | 52.47 | 18 | 52  | 1  | 439  | 1.44  |
| 2473.981 | 23 | Q06587       | R.GGGAGGSSV GGGAGGSSVG[3      | 2 | 1.291  | 5.90E-04 | 0.003     | 0 | 37.51 | 18 | 38  | 3  | 406  | 1.23  |
| 1211.674 | 14 | Q06830,P3211 | R.QITVNDLPVG QITVNDLPVGR      | 2 | -0.759 | 0.017    | 0.001     | 0 | 21.97 | 17 | 22  | 2  | 102  | 1.02  |
| 920.509  | 9  | Q06830,Q1316 | R.GLFIIDDK G GLFIIDDK[2       | 2 | -0.965 | 0.031    | 0.001     | 0 | 17.88 | 15 | 18  | 1  | 1.35 | 1.35  |
| 3211.369 | 18 | Q07157       | R.EDSSGMHHE EDSSGMHHEH[4      | 2 | 0.066  | 0.025    | 0.003     | 0 | 20.23 | 17 | 74  | 10 | 1748 | 0.8   |
| 1538.721 | 16 | Q07157       | K.SREDSLAQPV S[166.9984]REI   | 2 | 0.916  | 4.10E-04 | 0.002     | 1 | 40.71 | 19 | 77  | 8  | 1748 | 1.3   |
| 2225.996 | 15 | Q07157       | R.LEEPTPAPSTS LEEPTPAPSTS[3   | 2 | 1.224  | 0.002    | 0.004     | 0 | 33.16 | 18 | 77  | 8  | 1748 | 1.59  |
| 1538.721 | 8  | Q07157       | K.SREDSLAQPV SREDS[166.99     | 3 | 1.193  | 0.002    | 0.001     | 1 | 32.94 | 18 | 92  | 7  | 1748 | 0.65  |
| 2464.068 | 6  | Q07157       | K.QPYSPRPFDD QPYSPRPFDD[3     | 2 | 0.416  | 0.012    | 0.004     | 0 | 25.51 | 19 | 78  | 11 | 1748 | 1.61  |
| 1482.699 | 9  | Q07157       | R.IDSPGFKPASC IDSPGFKPASC[1   | 2 | -0.107 | 0.046    | 9.00E-04  | 0 | 19.27 | 18 | 71  | 9  | 1748 | 0.59  |
| 1809.765 | 17 | Q07157       | R.DDISEIQLAS DDISEIQLAS[1.    | 3 | 0.422  | 0.013    | 0.002     | 0 | 24.55 | 18 | 71  | 8  | 1748 | 1.29  |
| 3211.369 | 17 | Q07157       | R.EDSSGMHHE EDSSGMHHEH[4      | 2 | -0.244 | 0.004    | 0.003     | 0 | 28.25 | 17 | 92  | 7  | 1748 | 0.8   |
| 1169.52  | 6  | Q07157       | K.EISQDSLAAE EISQDS[166.99;   | 2 | -1.045 | 0.036    | 0.001     | 0 | 21.1  | 19 | 52  | 9  | 1748 | 0.96  |
| 1169.52  | 6  | Q07157       | K.EISQDSLAAE EIS[166.9984]C   | 2 | -0.929 | 0.03     | 0.001     | 0 | 22.24 | 19 | 77  | 10 | 1748 | 1.14  |
| 1111.599 | 4  | Q07157       | R.DNSILPDLK I DNSILPDLK[2     | 2 | -0.459 | 0.01     | 0.002     | 0 | 22.94 | 15 | 71  | 9  | 1748 | 1.31  |
| 1809.765 | 12 | Q07157       | R.DDISEIQLAS DDISEIQLASD[3    | 2 | 0.923  | 0.004    | 0.002     | 0 | 29.6  | 18 | 93  | 8  | 1748 | 1.29  |
| 1464.594 | 6  | Q07666       | R.SGSDMPSGA SG[S[166.9984]    | 2 | 0.173  | 0.002    | 0.002     | 0 | 32.28 | 18 | 37  | 2  | 443  | 1.35  |
| 1752.807 | 8  | Q07666       | K.KDDEENYLDL KDDEENYLDLFS     | 3 | 0.916  | 0.004    | 0.002     | 1 | 29.46 | 18 | 44  | 4  | 443  | 1.2   |
| 1464.594 | 7  | Q07666       | R.SGSDMPSGA S[166.9984]GS     | 2 | -0.628 | 0.014    | 0.002     | 0 | 24.27 | 18 | 24  | 2  | 443  | 1.35  |
| 1624.713 | 9  | Q07666       | K.DDEENYLDL DDEENYLDLFS[3     | 2 | 0.182  | 0.02     | 0.002     | 0 | 22.17 | 18 | 53  | 4  | 443  | 1.39  |
| 1241.603 | 8  | Q07866       | K.VDSTPTVTTU VDS[166.9984]    | 2 | 1.162  | 2.40E-04 | 7.00E-04  | 0 | 42.16 | 18 | 42  | 2  | 573  | 0.57  |
| 1159.561 | 5  | Q07889       | R.SASVSSILTK SAS[166.9984]    | 2 | -0.815 | 0.018    | 0.002     | 0 | 23.39 | 19 | 23  | 2  | 1333 | 1.3   |
| 1270.558 | 5  | Q07955       | K.VDGRSPSYG VDGPRS[166.9;     | 2 | -0.92  | 0.023    | 0.002     | 1 | 21.35 | 18 | 30  | 5  | 248  | 1.9   |
| 1277.614 | 8  | Q07960       | K.SSSPELVTHK SSS[166.9984]F   | 2 | -0.246 | 0.005    | 0.002     | 0 | 28.09 | 18 | 28  | 2  | 439  | 1.57  |
| 1110.555 | 8  | Q08170,Q1324 | R.LIVENLSSR.C LIVENLSS[166.   | 2 | -0.004 | 0.003    | 0.001     | 0 | 32.51 | 20 | 33  | 3  | 0.96 | 0.96  |
| 2125.957 | 19 | Q08174       | R.SNSPLSIQLQ S[166.9984]NSI   | 2 | -0.04  | 0.003    | 0.002     | 0 | 30.15 | 18 | 30  | 1  | 1060 | 0.74  |
| 2125.957 | 7  | Q08174       | R.SNSPLSIQLQ SNS[166.9984]    | 2 | -0.094 | 0.004    | 0.002     | 0 | 29.64 | 18 | 30  | 1  | 1060 | 0.74  |
| 2802.037 | 14 | Q08211       | K.DDDGGEDDD DDDGGEDDDA[3      | 2 | 1.291  | 5.50E-04 | 0.003     | 0 | 37.15 | 17 | 68  | 3  | 1270 | 0.94  |
| 3045.159 | 30 | Q08211       | K.DKDDGGEDD DKDDGGEDDD[3      | 2 | 1.256  | 1.90E-05 | 0.002     | 1 | 50.07 | 15 | 77  | 4  | 1270 | 0.5   |
| 1557.716 | 8  | Q08357       | K.EGALSRSVDE EGALSRSVS[166.   | 2 | -0.188 | 0.005    | 0.002     | 1 | 29.65 | 19 | 40  | 4  | 652  | 0.98  |
| 1110.501 | 5  | Q08357       | R.ALSMTHGSVI ALS[166.9984]    | 2 | -0.685 | 0.015    | 0.001     | 0 | 23.68 | 18 | 40  | 4  | 652  | 0.89  |
| 1637.682 | 7  | Q08357       | K.EGALSRSVDE EGALSRSVS[166.   | 2 | -0.752 | 0.019    | 0.002     | 1 | 23.01 | 18 | 40  | 4  | 652  | 1.1   |
| 1401.615 | 6  | Q08378       | R.QDLSSEVDTI QDS[166.9984]    | 2 | -1.039 | 0.032    | 1.00E-04  | 0 | 18.15 | 16 | 18  | 1  | 1498 | 0.08  |
| 2109.828 | 9  | Q08752       | K.DGSGDSDHPI DGS[166.9984]    | 2 | 0.832  | 4.70E-04 | 0.002     | 0 | 37.87 | 17 | 38  | 2  | 370  | 0.87  |
| 2109.828 | 10 | Q08752       | K.DGSGDSDHPI DSGSDS[166.9;    | 2 | 0.997  | 0.003    | 0.002     | 0 | 29.31 | 17 | 40  | 2  | 370  | 1.2   |
| 2929.078 | 20 | Q08945       | K.EGMNPSYDE EGMNPSYDEY[3      | 2 | 1.291  | 1.60E-04 | 0.002     | 0 | 40.16 | 15 | 40  | 2  | 709  | 0.52  |
| 1164.518 | 10 | Q08AD1       | K.SPPTPIDPEK S[166.9984]PTT   | 2 | -0.781 | 0.021    | 0.001     | 0 | 22.74 | 18 | 60  | 4  | 1489 | 0.87  |
| 1779.827 | 11 | Q08AD1       | R.SISNEGLTNN SIS[166.9984]N   | 2 | 1.857  | 4.40E-05 | 0.002     | 0 | 50.12 | 19 | 60  | 4  | 1489 | 0.87  |
| 1779.827 | 10 | Q08AD1       | R.SISNEGLTNN SIS[166.9984]    | 2 | 0.742  | 5.70E-04 | 0.002     | 0 | 38.97 | 19 | 43  | 3  | 1489 | 0.87  |
| 1898.696 | 13 | Q08AD1       | K.YDGEKDEQF YDGE[166.998      | 2 | -1.138 | 0.047    | 0.001     | 1 | 16.16 | 15 | 60  | 6  | 1489 | 0.64  |
| 1275.646 | 5  | Q08AE8       | K.LRVPSPPEIR.F LRPV[S[166.998 | 2 | -0.321 | 0.007    | 0.002     | 0 | 27.34 | 18 | 27  | 1  | 756  | 1.61  |
| 3094.284 | 18 | Q08I23       | R.AGEPNSPDAI AGE[166.99;      | 3 | 1.224  | 4.10E-07 | 0.003     | 0 | 70.3  | 19 | 129 | 6  | 767  | 0.94  |
| 1445.575 | 8  | Q08I23       | R.NNSGEFFDQ NNSGEFFDQ[1E      | 2 | 0.045  | 0.003    | 0.002     | 0 | 30    | 17 | 129 | 6  | 767  | 1.52  |
| 3174.251 | 14 | Q08I23       | R.AGEPNSPDAI AGE[166.99;      | 3 | 1.291  | 4.70E-06 | 0.002     | 0 | 58.5  | 18 | 245 | 9  | 767  | 0.53  |
| 2180.996 | 13 | Q08I23       | R.ESTQLSPADI ES[166.9984]T    | 2 | 0.606  | 7.70E-04 | 0.002     | 0 | 36.61 | 18 | 245 | 9  | 767  | 0.76  |
| 2180.996 | 11 | Q08I23       | R.ESTQLSPADI ESTQLS[166.99    | 3 | 0.262  | 0.018    | 0.003     | 0 | 22.97 | 18 | 178 | 10 | 767  | 1.31  |
| 3094.284 | 26 | Q08I23       | R.AGEPNSPDAI AGE[166.99;      | 3 | 1.127  | 9.70E-06 | 2.00E-04  | 0 | 57.27 | 20 | 178 | 10 | 767  | 0.06  |
| 1551.69  |    |              |                               |   |        |          |           |   |       |    |     |    |      |       |



|          |    |              |                                 |        |          |          |   |       |    |      |    |      |       |
|----------|----|--------------|---------------------------------|--------|----------|----------|---|-------|----|------|----|------|-------|
| 1569.723 | 9  | Q09666       | K.ISMODVDLSL ISMODVDLSLG 2      | 2.159  | 4.10E-08 | 0.003    | 0 | 78.11 | 17 | 1120 | 40 | 5890 | 1.79  |
| 1722.806 | 14 | Q09666       | R.LPSGSGAASP LPSGSGAAS[16 2     | 2.159  | 5.30E-06 | 0.002    | 0 | 59.1  | 19 | 1120 | 40 | 5890 | 1.33  |
| 1566.67  | 6  | Q09666       | K.GDRSPFPGQ GDRS[166.9984 2     | -0.565 | 0.011    | 0.002    | 1 | 24.9  | 18 | 1120 | 40 | 5890 | 1.60  |
| 1722.806 | 12 | Q09666       | R.LPSGSGAASP LPS[166.9984]C 2   | 2.159  | 6.80E-07 | 7.00E-04 | 0 | 68.04 | 19 | 1120 | 40 | 5890 | 0.4   |
| 1152.537 | 7  | Q09666       | K.MPSLEISAPK MPS[166.9984] 2    | 0.463  | 0.001    | 0.001    | 0 | 33.18 | 16 | 1074 | 45 | 5890 | 1.22  |
| 781.385  | 6  | Q09666       | K.LISGSLK M LSGPS[166.998 2     | 0.507  | 9.10E-04 | 0.001    | 0 | 34.62 | 17 | 843  | 36 | 5890 | 1.25  |
| 1413.626 | 10 | Q09666       | K.GGVTSPEAS GGVTS[166.9 2       | 2.024  | 9.20E-07 | 0.002    | 0 | 66.15 | 18 | 843  | 36 | 5890 | 1.68  |
| 1892.756 | 7  | Q09666       | K.ASLGSLEGEAI AS[166.9984]L 2   | 0.258  | 0.002    | 0.002    | 0 | 31.12 | 16 | 1119 | 49 | 5890 | 1.24  |
| 823.396  | 5  | Q09666       | K.APSLDIK G APS[166.9984] 2     | -0.005 | 0.003    | 6.00E-04 | 0 | 31.5  | 19 | 843  | 36 | 5890 | 0.75  |
| 1722.806 | 7  | Q09666       | R.LPSGSGAASP LPSGS[166.998 2    | 2.024  | 1.30E-06 | 7.00E-04 | 0 | 65.22 | 19 | 843  | 36 | 5890 | 0.4   |
| 989.47   | 4  | Q09666       | K.AEAPLSPK L AEAPLPS[166.9 2    | -0.122 | 0.004    | 0.001    | 0 | 31.32 | 20 | 1153 | 48 | 5890 | 1.21  |
| 1199.501 | 7  | Q09666       | K.GDLASVPSV GDLASVPS[16 2       | 0.63   | 7.70E-04 | 0.001    | 0 | 35.84 | 17 | 1153 | 48 | 5890 | 0.94  |
| 1802.772 | 6  | Q09666       | R.LPSGSGAASP LPSGSGAAS[16 2     | -0.701 | 0.015    | 0.002    | 0 | 23.57 | 18 | 1124 | 47 | 5890 | 0.98  |
| 1650.752 | 9  | Q09666       | K.GSEVGFHGA GS[166.9984]E 2     | -0.882 | 0.023    | 0.002    | 0 | 22.76 | 19 | 1124 | 47 | 5890 | 1.5   |
| 1812.79  | 11 | Q09666       | K.ASLGSLEGEAI AS[166.9984]L 2   | 2.021  | 1.20E-05 | 0.001    | 0 | 54.2  | 17 | 1124 | 47 | 5890 | 0.75  |
| 1230.529 | 6  | Q09666       | K.DIDISSPEFK DIDISS[166.998 1   | -0.377 | 0.039    | 0.002    | 0 | 18.56 | 17 | 971  | 41 | 5890 | 1.74  |
| 1206.517 | 8  | Q09666       | K.LQSGVSLAS LQSGVSV[166. 2      | -1.076 | 0.036    | 0.001    | 0 | 21.77 | 20 | 1016 | 42 | 5890 | 0.92  |
| 1800.805 | 8  | Q09666       | K.VDIDTPDIDH VIDIT[181.014 3    | 1.393  | 0.001    | 0.003    | 0 | 36.68 | 20 | 1153 | 48 | 5890 | 1.63  |
| 889.389  | 5  | Q09666,Q0966 | K.FSMPSLK G FSMPSS[166.998 2    | -0.292 | 0.005    | 9.00E-04 | 0 | 22.62 | 13 | 1153 | 47 | 5890 | 1.02  |
| 1239.622 | 5  | Q09666,Q0966 | K.GEGPDVDVN GEGPDVDVNL 2        | 0.153  | 0.002    | 0.001    | 0 | 33.08 | 19 | 1074 | 47 | 5890 | 1.08  |
| 1253.637 | 16 | Q09666,Q0966 | K.GEGPEVDVNI GEGPEVDVNL 2       | 0.93   | 3.90E-04 | 0.001    | 0 | 39.85 | 18 | 1120 | 40 | 5890 | 0.95  |
| 981.429  | 6  | Q09666,Q0966 | K.ADIVSGPK V ADIVSV[166.99 2    | -0.401 | 0.007    | 9.00E-04 | 0 | 26.54 | 18 | 1074 | 47 | 5890 | 0.96  |
| 721.332  | 4  | Q09666,Q0966 | K.FSLFK FS[166.9984]LF 2        | -0.659 | 0.016    | 0.002    | 0 | 20.94 | 15 | 1016 | 47 | 5890 | 2.16  |
| 1127.498 | 8  | Q09666       | R.NLSNEELTK S NLS[166.9984] 2   | -0.579 | 0.012    | 9.00E-04 | 0 | 24.76 | 18 | 25   | 1  | 810  | 0.83  |
| 1421.653 | 6  | Q09666       | R.RQDSAGVLL RQDS[166.9984 2     | 0.606  | 7.60E-04 | 0.002    | 1 | 36.61 | 18 | 37   | 3  | 1302 | 1.36  |
| 1634.614 | 7  | Q09666       | K.EMLASDDEE EMLAS[166.99 2      | 0.083  | 0.002    | -0.002   | 0 | 29.38 | 16 | 47   | 3  | 675  | -1.27 |
| 1900.618 | 13 | Q09666       | K.TISQFELTPG TIS[166.9984]C 2   | -0.332 | 0.006    | 0.002    | 0 | 28.21 | 19 | 28   | 2  | 675  | 1.5   |
| 1327.70  | 9  | Q12770       | R.RDSGVSGSL RDS[166.9984] 3     | 0.325  | 0.014    | 0.002    | 1 | 24.6  | 19 | 25   | 1  | 1279 | 1     |
| 1942.829 | 9  | Q12770       | R.RDSGVSGSL RDSGVSV[166. 3      | 0.969  | 0.003    | 0.002    | 1 | 31.04 | 19 | 31   | 3  | 1279 | 1     |
| 1859.915 | 12 | Q12774       | R.AEELSPAALS AEELSPAALS[1 2     | 1.967  | 3.50E-05 | 0.003    | 0 | 49.22 | 17 | 62   | 3  | 1597 | 1.63  |
| 2320.031 | 22 | Q12774       | R.RDSGRPPG RDS[166.9984] 3      | 0.967  | 0.003    | 0.002    | 1 | 30.99 | 19 | 62   | 3  | 1597 | 0.98  |
| 1859.915 | 12 | Q12774       | R.AEELSPAALS AEELSPAALS[ 2      | 2.127  | 2.10E-05 | 0.003    | 0 | 51.33 | 17 | 53   | 4  | 1597 | 1.63  |
| 1963.328 | 14 | Q12789       | K.TSOPPPQGE TSOPPPQGEA 2        | -0.506 | 0.01     | 0.002    | 0 | 25.49 | 18 | 29   | 7  | 2109 | 0.89  |
| 2417.008 | 9  | Q12789       | R.RASWASENG RASWAS[166.9 3      | 1.144  | 0.002    | 0.004    | 1 | 31.76 | 18 | 88   | 7  | 2109 | 1.54  |
| 1969.742 | 13 | Q12789       | R.KNSSTDQSG KNSST[181.014 3     | 1.025  | 0.003    | 0.003    | 1 | 25.57 | 13 | 88   | 7  | 2109 | 1.71  |
| 2417.008 | 12 | Q12789       | R.RASWASENG RAS[166.9984] 2     | -0.96  | 0.027    | 0.002    | 1 | 20.95 | 18 | 88   | 7  | 2109 | 1.05  |
| 1889.776 | 11 | Q12789       | R.KNSSTDQSG KNS[166.9984] 2     | -0.846 | 0.02     | 0.003    | 1 | 20.09 | 16 | 29   | 7  | 2109 | 1.79  |
| 1969.742 | 15 | Q12789       | R.KNSSTDQSG KNS[166.9984 3      | -0.103 | 0.041    | 0.003    | 1 | 14.31 | 13 | 29   | 7  | 2109 | 1.71  |
| 1889.776 | 11 | Q12789       | R.KNSSTDQSG KNS[166.9984 2      | 0.011  | 0.003    | 0.003    | 1 | 28.66 | 16 | 88   | 7  | 2109 | 1.79  |
| 2200.933 | 10 | Q12789       | R.AGVRPSSSGS AGVRPSSS[166 3     | -0.12  | 0.041    | 2.00E-04 | 0 | 19.15 | 18 | 81   | 6  | 2109 | 0.11  |
| 2200.933 | 8  | Q12789       | R.AGVRPSSSGS AGVRPSSS[166 2     | 0.736  | 0.006    | 2.00E-04 | 0 | 27.71 | 18 | 52   | 4  | 2109 | 0.11  |
| 2200.933 | 8  | Q12789       | R.AGVRPSSSGS AGVRPSSS[166. 2    | -0.016 | 0.003    | 0.004    | 0 | 30.37 | 18 | 118  | 8  | 2109 | 1.97  |
| 1900.808 | 10 | Q12797       | K.LGYDADGDL GYDADGDGD 2         | 0.845  | 4.80E-04 | 0.002    | 0 | 43.98 | 23 | 44   | 2  | 758  | 0.83  |
| 1800.762 | 9  | Q12802       | K.QSPECFNLD QS[166.9984]PI 2    | -0.374 | 0.007    | 0.004    | 0 | 26.81 | 18 | 59   | 5  | 2813 | 1.98  |
| 2366.909 | 7  | Q12802       | R.DMAECSTPLF DMAEC[160.03 3     | 0.959  | 0.004    | 0.002    | 0 | 26.91 | 15 | 59   | 5  | 2813 | 1.01  |
| 2366.909 | 11 | Q12802       | R.DMAECSTPLF DMAEC[160.03 3     | 0.456  | 0.013    | 0.002    | 0 | 21.91 | 15 | 48   | 7  | 2813 | 1.01  |
| 2366.909 | 19 | Q12802       | R.DMAECSTPLF DMAEC[160.03 3     | 1.152  | 0.002    | 0.002    | 0 | 28.87 | 15 | 88   | 7  | 2813 | 1.01  |
| 1385.62  | 7  | Q12802       | K.SGSLDSELSV SGLDSELSV[1 2      | 2.197  | 8.70E-06 | 0.002    | 0 | 55.81 | 18 | 88   | 7  | 2813 | 1.4   |
| 786.355  | 4  | Q12802       | R.SLSFR R SLS[166.9984]P 2      | -0.952 | 0.028    | 9.00E-04 | 0 | 19.06 | 16 | 112  | 6  | 2813 | 1.19  |
| 1699.622 | 8  | Q12802       | R.DEDEGIPSEN DEDEGIPS[166. 2    | -0.939 | 0.027    | 5.00E-04 | 0 | 19.19 | 16 | 112  | 6  | 2813 | 0.31  |
| 1385.62  | 8  | Q12802       | K.SGSLDSELSV SGLDSELSV[166 2    | -1.073 | 0.034    | 0.002    | 0 | 19.81 | 18 | 106  | 9  | 2813 | 1.4   |
| 1553.757 | 7  | Q12802       | R.SLSRSPSEU QS[166.9984]R 2     | -0.561 | 0.011    | 0.002    | 0 | 25.92 | 19 | 55   | 7  | 2813 | 1.2   |
| 1538.746 | 6  | Q12830       | R.VLDDVRSRPE VLDDVRSR[166 2     | -0.655 | 0.014    | 8.00E-04 | 1 | 25    | 19 | 55   | 5  | 3046 | 0.54  |
| 1538.746 | 10 | Q12830       | R.VLDDVRSRPE VLDDVRS[166.99 2   | -0.749 | 0.017    | 8.00E-04 | 1 | 24.06 | 19 | 34   | 3  | 3046 | 0.54  |
| 3197.333 | 19 | Q12830       | R.QEOSPNANN QEOS[166.9984 3     | 0.735  | 0.006    | 9.00E-04 | 0 | 28.67 | 19 | 34   | 3  | 3046 | 0.3   |
| 2700.105 | 10 | Q12857       | R.SPVGSGQSSG S[166.9984]PG 3    | 0.175  | 0.02     | 0.002    | 0 | 23.07 | 19 | 55   | 2  | 509  | 0.76  |
| 2309.89  | 8  | Q12857       | K.SVEDEMSPK S[166.9984]VEI 2    | 0.931  | 3.40E-04 | 0.002    | 0 | 37.86 | 16 | 40   | 2  | 509  | 1.04  |
| 3022.175 | 14 | Q12872       | K.SGVSSDNEDE SGVSS[166.998 3    | 1.291  | 1.10E-04 | 9.00E-04 | 0 | 44.33 | 17 | 44   | 1  | 951  | 0.31  |
| 3022.175 | 15 | Q12872       | K.SGVSSDNEDE SGVSS[166.9984 3   | 1.256  | 1.20E-05 | 9.00E-04 | 0 | 53.85 | 17 | 54   | 2  | 951  | 0.31  |
| 1917.734 | 7  | Q12873       | K.METEADAPSI METEADAPSI[1 2     | -0.985 | 0.032    | 0.001    | 0 | 19.7  | 17 | 20   | 2  | 2000 | 0.54  |
| 1918.843 | 11 | Q12873       | K.ELQDGGPPSS ELQDGGPPSS[1 2     | 1.479  | 1.00E-04 | 9.00E-04 | 0 | 45.35 | 18 | 45   | 3  | 2000 | 0.47  |
| 2641.122 | 21 | Q12888       | R.IDEDGENTQI IDEEDGENTQIE 3     | 1.189  | 0.002    | 0.002    | 0 | 34.21 | 20 | 352  | 24 | 1972 | 0.93  |
| 1751.764 | 9  | Q12888       | R.GNLLHFPSSQ GNLLHFPSS[16 2     | 0.936  | 3.80E-04 | 0.004    | 0 | 38.91 | 17 | 352  | 24 | 1972 | 2.06  |
| 1439.678 | 6  | Q12888       | K.LITSEERPAI LITSEERS[166. 2    | -1.005 | 0.029    | 0.002    | 1 | 22.5  | 20 | 215  | 19 | 1972 | 1.66  |
| 2242.975 | 15 | Q12888       | K.SPEPEVLTQE QS[166.9984]PE 3   | 1.224  | 0.001    | 0.004    | 0 | 36.16 | 19 | 215  | 19 | 1972 | 1.91  |
| 2407.103 | 19 | Q12888       | K.SGTAETEPVE SGTAEETEPVEQ 3     | 1.224  | 0.001    | 0.004    | 0 | 35.7  | 19 | 215  | 19 | 1972 | 1.73  |
| 2344.905 | 14 | Q12888       | R.ETAVPGLGII ETAVPGLGIED 2      | -0.668 | 0.015    | 0.002    | 0 | 23.87 | 18 | 352  | 24 | 1972 | 1     |
| 2029.904 | 8  | Q12888       | R.TSSVLGMSVE TSS[166.9984] 2    | -0.192 | 0.004    | 0.001    | 0 | 29.63 | 19 | 215  | 19 | 1972 | 0.58  |
| 1525.689 | 11 | Q12888       | K.NGSTAVAES NGSTAVAESVA 2       | 1.21   | 1.80E-04 | 0.001    | 0 | 43.65 | 19 | 352  | 24 | 1972 | 0.74  |
| 1772.741 | 13 | Q12888       | K.NSPEDLGLSL NS[166.9984]PI 2   | 2.159  | 4.90E-07 | 0.003    | 0 | 68.09 | 17 | 352  | 24 | 1972 | 1.51  |
| 2407.103 | 12 | Q12888       | K.SGTAETEPVE SGTAEETEPVEQ 2     | -0.576 | 0.011    | 0.003    | 0 | 25.79 | 19 | 352  | 24 | 1972 | 1.23  |
| 1811.821 | 16 | Q12888       | R.STPFIVPSSPTI STPFIVPSS[166. 2 | -0.192 | 0.005    | 0.003    | 0 | 28.63 | 18 | 352  | 24 | 1972 | 1.47  |
| 1772.741 | 10 | Q12888       | K.NSPEDLGLSL NSPEDLGLSL[1 2     | -0.937 | 0.03     | 0.002    | 0 | 20.18 | 17 | 352  | 24 | 1972 | 1.34  |
| 1117.427 | 6  | Q12888       | R.SEDMPFSPK SEDMPFSP[166. 2     | -0.43  | 0.007    | 0.001    | 0 | 21.25 | 13 | 352  | 24 | 1972 | 1.13  |
| 2029.904 | 14 | Q12888       | R.TSSVLGMSVE TSS[166.9984]S 2   | 0.303  | 0.001    | 0.001    | 0 | 34.58 | 19 | 352  | 24 | 1972 | 2.58  |
| 1550.681 | 12 | Q12888       | K.LMLSTSEYSQ LMLSTSEYSQS[ 2     | -0.214 | 0.006    | 0.004    | 0 | 27.44 | 17 | 353  | 21 | 1972 | 2.6   |
| 1424.667 | 6  | Q12888       | K.AADISLNLVI AADIS[166.998 2    | -1.1   | 0.043    | 0.002    | 0 | 19.53 | 18 | 206  | 17 | 1972 | 1.45  |
| 1192.525 | 6  | Q12888       | R.SEDPPTPIR SEDPPTT[181.0 2     | -1.176 | 0.047    | 7.00E-04 | 0 | 19.8  | 19 | 340  | 22 | 1972 | 0.55  |
| 1119.461 | 9  | Q12888       | K.SVEYEDLKS S[166.9984]VE 2     | -1.209 | 0.047    | 0.002    | 0 | 18.44 | 18 | 316  | 20 | 1972 | 1.93  |
| 1811.821 | 9  | Q12888       | R.STPFIVPSSPTI STPFIVPSS[1 2    | -1.028 | 0.032    | 0.003    | 0 | 20.27 | 18 | 215  | 19 | 1972 | 1.47  |
| 2020.849 | 12 | Q12888       | K.HEEQSNEDIH HEEQS[166.998 2    | -0.775 | 0.017    | 0.002    | 0 | 23.8  | 19 | 215  | 19 | 1972 | 1.05  |
| 1772.741 | 10 | Q12888       | K.NSPEDLGLSL NSPEDLGLS[16 2     | -0.372 | 0.008    | 0.002    | 0 | 25.81 | 17 | 206  | 17 | 1972 | 1.34  |
| 1540.66  | 7  | Q12888       | R.VDVSCPELEG VDVSV[166.9984 2   | 0.532  | 9.20E-04 | 0.002    | 0 | 35.88 | 18 | 340  | 22 | 1972 | 1.06  |
| 3052.186 | 19 | Q12905       | K.KEGEEEEET KEGEEEEETEE 3       | 0.326  | 0.015    | 1.00E-04 | 1 | 23.58 | 18 | 24   | 1  | 390  | 0.02  |
| 1940.878 | 11 | Q12906       | K.VLQDMGLPTI VLQDMGLPTG 2       | 2.159  | 1.80E-05 | 9.00E-04 | 1 | 53.68 | 19 | 53   | 4  | 894  | 0.45  |
| 1940.878 | 13 | Q12906       | K.VLQDMGLPTI VLQDMGLPTG 3       | 0.134  | 0.023    | 0.002    |   |       |    |      |    |      |       |

|          |    |              |                                 |        |          |           |   |       |    |     |   |      |       |
|----------|----|--------------|---------------------------------|--------|----------|-----------|---|-------|----|-----|---|------|-------|
| 1640.691 | 10 | Q13098       | R.EGSGELTPA EGS[166.9984] 2     | 2.06   | 2.80E-05 | -8.00E-04 | 0 | 51.15 | 18 | 71  | 3 | 491  | -0.46 |
| 2077.93  | 8  | Q13098       | K.SPREGSQGE S[166.9984]PF 3     | 0.231  | 0.021    | 0.001     | 1 | 21.65 | 17 | 50  | 3 | 491  | 0.61  |
| 2077.93  | 8  | Q13098       | K.SPREGSQGE SPPREGS[166.9 3     | 0.065  | 0.031    | 0.001     | 1 | 19.97 | 17 | 71  | 3 | 491  | 0.61  |
| 2724.008 | 18 | Q13107       | K.EQLSETEGSG EQLSET[181.01 3    | 0.052  | 0.027    | 0.002     | 0 | 18.89 | 16 | 19  | 2 | 963  | 0.78  |
| 1218.563 | 9  | Q13111       | R.GLLSNHTGSP GLLSNHTGS[16 2     | -0.109 | 0.004    | 0.001     | 0 | 29.44 | 18 | 29  | 2 | 956  | 1.01  |
| 1218.563 | 8  | Q13111       | R.GLLSNHTGSP GLLSNHT[181.C 2    | -0.073 | 0.004    | 0.001     | 0 | 29.81 | 18 | 30  | 4 | 956  | 1.01  |
| 2280.043 | 24 | Q13111       | R.SPSTYUHTPT S[166.9984]PST 3   | -0.025 | 0.038    | 0.004     | 0 | 20.11 | 18 | 20  | 4 | 956  | 1.52  |
| 1631.754 | 14 | Q13112       | R.GSSPGPRPVE GSS[166.9984] 3    | 0.528  | 0.01     | 0.002     | 0 | 26.6  | 19 | 32  | 3 | 559  | 0.97  |
| 1619.706 | 9  | Q13112       | R.TQDPPSSPGTT TQDPPS[166.99 2   | -0.744 | 0.018    | 0.001     | 0 | 24.11 | 19 | 32  | 3 | 559  | 0.86  |
| 1631.754 | 9  | Q13112       | R.GSSPGPRPVE GS[166.9984]S 3    | 0.482  | 0.011    | 0.002     | 0 | 26.18 | 19 | 30  | 5 | 559  | 0.97  |
| 1619.706 | 7  | Q13112       | R.TQDPPSSPGTT TQDPS[166.99 2    | -0.415 | 0.008    | 0.001     | 0 | 27.39 | 19 | 30  | 4 | 559  | 0.86  |
| 1915.854 | 17 | Q13129       | K.SPSPAIPEQNH S[166.9984]P 2    | -0.783 | 0.021    | 0.002     | 0 | 22.72 | 18 | 23  | 5 | 1914 | 0.98  |
| 1710.733 | 13 | Q13136       | K.RSSDGLSLHEI RSSDGS[166.99 2   | -0.85  | 0.022    | 0.001     | 1 | 22.05 | 18 | 23  | 5 | 1202 | 0.69  |
| 1710.733 | 11 | Q13136       | K.RSSDGLSLHEI RSS[166.9984] 3   | -0.092 | 0.041    | 7.00E-04  | 1 | 20.4  | 19 | 61  | 5 | 1202 | 0.4   |
| 1446.6   | 9  | Q13136       | R.VTSSMSSPSV VTSSMSS[166. 2     | -0.999 | 0.028    | 0.002     | 0 | 19.56 | 17 | 25  | 4 | 1202 | 1.22  |
| 1446.6   | 7  | Q13136       | R.VTSSMSSPSV VTSSMSS[166.9 2    | -0.959 | 0.026    | 0.002     | 0 | 19.94 | 17 | 71  | 6 | 1202 | 1.22  |
| 2517.108 | 13 | Q13136       | R.NSTGSDQGPV NSTGSDQDGPV 3      | -0.073 | 0.041    | -8.00E-04 | 0 | 19.63 | 18 | 71  | 6 | 1202 | -0.32 |
| 1446.6   | 8  | Q13136       | R.VTSSMSSPSV VTSSMSSP[16 2      | -0.997 | 0.028    | 0.002     | 0 | 19.57 | 17 | 48  | 3 | 1202 | 1.22  |
| 1197.461 | 6  | Q13136,07533 | K.CETSPSSPR...C[160.0307]E 2    | -0.97  | 0.027    | 0.002     | 0 | 15.85 | 13 | 23  |   |      | 1.78  |
| 1291.495 | 9  | Q13151       | K.EDIYSGGGGCE EDIYSGGGGGG 2     | -0.733 | 0.016    | 0.002     | 0 | 20.22 | 15 | 20  | 1 | 305  | 1.74  |
| 1291.495 | 5  | Q13151       | K.EDIYSGGGGCE EDIYS[166.99 2    | -0.977 | 0.028    | 0.002     | 0 | 17.76 | 15 | 18  | 1 | 305  | 1.74  |
| 2377.092 | 13 | Q13153       | R.DVATSPISPT E DVATSPISPTEN 3   | 1.224  | 8.30E-04 | 0.004     | 0 | 30.05 | 20 | 105 | 5 | 545  | 1.61  |
| 2377.092 | 15 | Q13153       | R.DVATSPISPT E DVATSPISPT[16. 2 | 1.947  | 3.50E-05 | -2.00E-04 | 0 | 51.02 | 19 | 78  | 5 | 545  | -0.08 |
| 2457.058 | 9  | Q13153       | R.DVATSPISPT E DVATSPISPT[1 3   | -0.003 | 0.031    | 0.002     | 0 | 22.32 | 20 | 73  | 4 | 545  | 0.65  |
| 2377.092 | 15 | Q13153       | R.DVATSPISPT E DVATSPISPT[1 2   | 1.53   | 9.10E-05 | -2.00E-04 | 0 | 46.84 | 19 | 73  | 4 | 545  | -0.08 |
| 2377.092 | 18 | Q13153       | R.DVATSPISPT E DVATSPISPTEN 2   | 1.063  | 2.70E-04 | -2.00E-04 | 0 | 42.17 | 19 | 73  | 4 | 545  | -0.08 |
| 1982.714 | 18 | Q13158       | R.SGAMSPMSV SGAMS[166.99 2      | 0.717  | 6.40E-04 | 0.004     | 0 | 35.72 | 16 | 36  | 1 | 208  | 2     |
| 1777.841 | 5  | Q13164       | K.SQVEDPLPPVI SQVEDPLPVFS 2     | -0.282 | 0.005    | 0.002     | 0 | 28.73 | 19 | 29  | 1 | 816  | 1.4   |
| 1777.841 | 18 | Q13164       | K.SQVEDPLPPVI SQVEDPLPVFS 2     | -0.46  | 0.008    | 0.002     | 0 | 26.94 | 19 | 27  | 2 | 816  | 1.4   |
| 3395.516 | 14 | Q13177       | K.GTEAPAVTTE GTEAPAVT[1 3       | 1.291  | 1.70E-05 | 0.002     | 0 | 52.03 | 17 | 62  | 5 | 524  | 0.46  |
| 1161.523 | 11 | Q13177       | K.YLSFTPPEK D YLS[166.9984]F 2  | -0.127 | 0.004    | 0.002     | 0 | 26.28 | 15 | 62  | 5 | 524  | 1.68  |
| 1552.577 | 7  | Q13185       | R.LTWHSCPEDE LTWHSC[166.99 2    | -0.526 | 0.01     | 0.002     | 0 | 23.29 | 16 | 23  | 2 | 183  | 1.49  |
| 1552.577 | 6  | Q13185       | R.LTWHSCPEDE LT[181.014]WH 2    | -1.197 | 0.047    | 0.002     | 0 | 16.58 | 16 | 18  | 2 | 183  | 1.49  |
| 1661.827 | 11 | Q13185       | K.KVEEAPEEPEF KVEEAPEEPEV 3     | -0.116 | 0.043    | 0.001     | 1 | 19.19 | 18 | 21  | 3 | 183  | 0.83  |
| 1472.611 | 7  | Q13185       | R.LTWHSCPEDE LTWHSC[160.0 2     | 0.28   | 0.002    | 0.003     | 0 | 33.35 | 18 | 38  | 2 | 183  | 2.13  |
| 2586.991 | 12 | Q13188       | R.ELEEEENSDEI ELEEEENS[16 3     | -0.15  | 0.043    | 0.001     | 0 | 16.86 | 16 | 17  | 1 | 491  | 0.52  |
| 1707.697 | 12 | Q13206       | R.SNSEVEDVGF SNS[166.9984] 2    | 1.975  | 3.50E-05 | 0.002     | 0 | 50.3  | 18 | 50  | 3 | 875  | 1.3   |
| 1534.651 | 6  | Q13242       | R.GSPHYFSPFRI GS[166.9984]P 2   | -0.969 | 0.026    | 0.003     | 0 | 21.84 | 19 | 22  | 4 | 221  | 1.96  |
| 1614.618 | 7  | Q13242       | R.GSPHYFSPFRI GS[166.9984]P 2   | -1.109 | 0.041    | 0.002     | 0 | 18.45 | 17 | 23  | 5 | 221  | 1.11  |
| 1310.575 | 9  | Q13243       | R.DADDVAYELE DADDVAYELDG 2      | 1.689  | 6.30E-05 | 0.002     | 0 | 47.44 | 18 | 69  | 2 | 272  | 1.33  |
| 1444.625 | 14 | Q13263       | R.SRSGEGEVSG SRS[166.9984] 2    | 0.986  | 3.40E-04 | 0.002     | 1 | 39.41 | 17 | 103 | 3 | 835  | 1.04  |
| 1201.492 | 9  | Q13263       | R.SGEGEVSGLS S[166.9984]GE 2    | 0.794  | 4.50E-04 | 4.00E-04  | 0 | 37.49 | 17 | 55  | 2 | 835  | 1.06  |
| 1520.713 | 7  | Q13263       | K.DHQYQFLEDA DHQYQFLEDAV 3      | 1.342  | 3.10E-04 | 0.002     | 0 | 41.6  | 19 | 100 | 3 | 835  | 0.33  |
| 1929.833 | 9  | Q13263       | K.EEDGSLSDG, EEDGSL[166.9 2     | 0.953  | 3.30E-04 | -6.00E-04 | 0 | 41.07 | 19 | 115 | 4 | 835  | -0.3  |
| 1098.634 | 7  | Q13268       | R.VNVCVPGIHK VNC[160.0307] 2    | -0.65  | 0.013    | 0.001     | 0 | 20.05 | 14 | 20  | 1 | 258  | 1.2   |
| 1964.896 | 11 | Q13283       | K.SSSPAPADIAC SSS[166.9984]F 2  | 1.631  | 7.00E-05 | 0.003     | 0 | 47.86 | 19 | 48  | 1 | 466  | 1.49  |
| 1964.896 | 12 | Q13283       | K.SSSPAPADIAC S[166.9984]SF 2   | 2.025  | 4.30E-07 | 0.003     | 0 | 70    | 19 | 70  | 1 | 466  | 1.49  |
| 1469.577 | 5  | Q13404       | K.LPQPPEGQCY LPQPPEGQC[1 2      | -0.877 | 0.024    | 0.002     | 0 | 19.81 | 16 | 20  | 1 | 147  | 1.32  |
| 2030.83  | 13 | Q13409       | K.SVSTPSEAGS S[166.9984]VS 2    | 0.404  | 0.001    | 0.001     | 0 | 34.59 | 18 | 35  | 1 | 638  | 0.7   |
| 2030.83  | 12 | Q13409       | K.SVSTPSEAGS S[166.9984] 2      | -0.765 | 0.019    | 0.001     | 0 | 22.91 | 18 | 23  | 1 | 638  | 0.7   |
| 1245.576 | 6  | Q13415       | K.VAFSEITSPSK VAFSEITS[16 2     | 0.588  | 7.20E-04 | 0.002     | 0 | 38.43 | 20 | 49  | 2 | 861  | 1.25  |
| 1676.732 | 9  | Q13415       | K.SAESPSWTPA SAES[166.9984 2    | -1.056 | 0.035    | -0.002    | 0 | 19.97 | 18 | 20  | 3 | 861  | -1.17 |
| 1245.562 | 10 | Q13425       | R.GPAGAEAGAS GPAGAEAGAS[ 2      | 0.777  | 4.90E-04 | 9.00E-04  | 0 | 39.32 | 19 | 85  | 2 | 540  | 0.7   |
| 1431.651 | 11 | Q13425       | R.SPSLSDLTFA SPS[166.9984]P 2   | 1.815  | 4.30E-05 | 0.002     | 0 | 50.7  | 20 | 62  | 4 | 540  | 1.43  |
| 1431.651 | 8  | Q13425       | R.SPSLSDLTFA SPS[166.9984] 2    | -0.136 | 0.004    | 0.002     | 0 | 31.18 | 20 | 55  | 4 | 540  | 1.43  |
| 1245.552 | 9  | Q13427       | R.RSETPPHWR RSET[181.014]F 3    | 0.116  | 0.024    | 0.001     | 1 | 23.51 | 20 | 24  | 3 | 754  | 0.78  |
| 1636.769 | 5  | Q13428       | K.TSQVGAASAF TSQVGAASAPA 2      | -0.555 | 0.011    | 0.001     | 1 | 26    | 19 | 118 | 8 | 1488 | 0.67  |
| 1442.677 | 12 | Q13428       | K.LDSSPSSSTL LDSS[166.9984 2    | 1.957  | 3.10E-05 | 0.001     | 0 | 51.12 | 19 | 118 | 8 | 1488 | 0.96  |
| 1467.636 | 7  | Q13428       | K.LGAGEGGEAL LGAGEGGEASV 2      | 2.159  | 1.40E-05 | 0.003     | 0 | 55.26 | 19 | 118 | 8 | 1488 | 1.86  |
| 1191.577 | 8  | Q13428       | K.VGPATPSAQL VGPAT[181.01 2     | -1.138 | 0.041    | 0.001     | 0 | 20.17 | 19 | 96  | 7 | 1488 | 0.98  |
| 1595.731 | 19 | Q13428       | K.KLGAGEGGEJ KLGAGEGGEAS 2      | 0.526  | 0.001    | -4.00E-04 | 1 | 35.81 | 18 | 96  | 7 | 1488 | -0.27 |
| 1636.769 | 10 | Q13428       | K.TSQVGAASAF TSQVGAAS[16 3      | 0.227  | 0.021    | 8.00E-04  | 1 | 22.63 | 18 | 107 | 6 | 1488 | 0.48  |
| 1407.568 | 9  | Q13433       | K.YESQLSTNEE YESQL[166.99 2     | -0.275 | 0.007    | 8.00E-04  | 0 | 26.79 | 17 | 27  | 1 | 755  | 0.97  |
| 1761.733 | 10 | Q13439       | R.TSSFTQLDKE TSS[166.9984]F 2   | 2.159  | 1.30E-05 | 0.002     | 0 | 54.88 | 19 | 121 | 6 | 2230 | 0.56  |
| 1113.534 | 7  | Q13439       | R.VPSVESLFR S VPS[166.9984] 2   | 0.667  | 7.20E-04 | 0.003     | 0 | 36.22 | 17 | 121 | 6 | 2230 | 2.34  |
| 2096.854 | 12 | Q13439       | K.EENPESDGEP EENPES[166.99 2    | 2.159  | 8.80E-07 | 0.001     | 0 | 65.45 | 17 | 121 | 6 | 2230 | 0.65  |
| 1761.733 | 8  | Q13439       | R.TSSFTQLDKE TS[166.9984]F 2    | 1.634  | 6.50E-05 | 0.002     | 0 | 47.92 | 19 | 102 | 5 | 2230 | 0.96  |
| 1069.519 | 4  | Q13443       | R.HVSPVTPPRL E HVSPVTT[181.0 2  | -1.219 | 0.048    | 0         | 0 | 19.36 | 19 | 19  | 2 | 819  | -0.02 |
| 1149.485 | 7  | Q13443       | R.HVSPVTPPRL E HVSP[166.9984] 2 | -1.022 | 0.034    | -5.00E-04 | 0 | 20.31 | 18 | 23  | 2 | 819  | -0.48 |
| 1738.697 | 9  | Q13459       | R.VSPAPAGSAP VSPAPAGS[166 2     | 1.437  | 1.10E-04 | 0.002     | 0 | 41.9  | 15 | 95  | 5 | 2157 | 0.9   |
| 2193.007 | 17 | Q13459       | K.KPGDASSLPD KPGDASSLPDA 3      | 1.137  | 0.003    | 0.002     | 0 | 31.71 | 18 | 37  | 3 | 2157 | 0.87  |
| 1806.838 | 11 | Q13459       | R.VQEKPDSPGCV VQEKPD[166. 3     | 1.291  | 3.90E-04 | 0.003     | 0 | 40.97 | 19 | 41  | 5 | 2157 | 1.45  |
| 1294.568 | 8  | Q13459       | R.RTSFSTSDVSH RTS[166.9984] 2   | -0.845 | 0.02     | 0.001     | 1 | 22.11 | 18 | 26  | 4 | 2157 | 1.09  |
| 1570.688 | 10 | Q13501       | R.LTPVSPSSST LTPVS[166.998 2    | 1.398  | 1.20E-04 | 0.002     | 0 | 44.53 | 18 | 45  | 3 | 440  | 1.61  |
| 1813.822 | 7  | Q13501       | R.SRLTPVSPSS SRLT[181.014]F 2   | -1.164 | 0.042    | 0.002     | 1 | 19.91 | 19 | 53  | 3 | 440  | 0.88  |
| 1893.788 | 11 | Q13501       | R.SRLTPVSPSS SRLT[181.014]F 2   | -0.383 | 0.008    | 0.002     | 1 | 26.71 | 18 | 54  | 4 | 440  | 0.83  |
| 3004.303 | 7  | Q13506       | R.QSSEHSPNG QSS[166.9984] 3     | -0.079 | 0.038    | 0.002     | 0 | 20.53 | 19 | 21  | 2 | 487  | 0.53  |
| 1986.792 | 6  | Q13523       | K.SINEEVEVSI SINEEVEVSI[ 2      | 0.288  | 0.002    | 0.002     | 0 | 33.43 | 18 | 99  | 4 | 1007 | 1.22  |
| 1986.792 | 12 | Q13523       | K.SINEEVEVSI S[166.9984]NE 2    | 2.159  | 1.30E-07 | 4.00E-04  | 0 | 74.54 | 18 | 99  | 4 | 1007 | 0.22  |
| 1486.54  | 7  | Q13523       | R.EQEMEDAN EQEMEDANS[ 2         | -0.251 | 0.006    | 0.002     | 0 | 26.04 | 16 | 99  | 4 | 1007 | 1.62  |
| 2066.759 | 10 | Q13523       | K.SINEEVEVSI S[166.9984]NE 2    | 0.285  | 0.002    | 0.003     | 0 | 31.4  | 16 | 115 | 7 | 1007 | 1.55  |
| 1559.64  | 9  | Q13523       | K.DASPINRWFS DAS[166.9984] 2    | -1.14  | 0.04     | 0.002     | 1 | 19.13 | 18 | 132 | 7 | 1007 | 1.21  |
| 1882.793 | 12 | Q13535       | K.GVELCFPENE GVELC[160.030 2    | -0.411 | 0.008    | 0.005     | 0 | 26.44 | 18 | 26  | 1 | 2644 | 2.63  |
| 2109.759 | 13 | Q13547       | R.JACEEESDSEI AC[160.0307]E 2   | 1.032  | 3.10E-04 | 0.002     | 0 | 36.87 | 14 | 37  | 1 | 482  | 1.12  |
| 2109.759 | 23 | Q13547       | R.JACEEESDSEI AC[160.0307]E 2   | 1.305  | 1.70E-04 | 0.002     | 0 | 39.58 | 14 | 40  | 1 | 482  | 1.12  |
| 1866.695 | 8  | Q13555       | K.GSTESCNTTT GST[181.014]E 2    | 1.944  | 7.20E-08 | 4.00E-04  | 0 | 73.75 | 15 | 74  | 1 | 558  | 0.23  |
| 1866.695 | 6  | Q13555       | K.GSTESCNTTT GSTES[166.998      |        |          |           |   |       |    |     |   |      |       |

|          |    |              |                               |   |        |          |           |   |       |    |     |    |      |       |
|----------|----|--------------|-------------------------------|---|--------|----------|-----------|---|-------|----|-----|----|------|-------|
| 1495.705 | 5  | Q13813       | R.WRSLOQLAEI WRS[166.9984]    | 3 | 0.404  | 0.014    | 0.001     | 1 | 24.39 | 18 | 73  | 5  | 2472 | 0.95  |
| 2001.895 | 19 | Q13884       | K.GSPVSEIGWE GSPVSEIGWETI     | 2 | 0.989  | 2.90E-04 | 0.002     | 0 | 41.44 | 19 | 41  | 2  | 538  | 1.27  |
| 1963.877 | 23 | Q13884       | R.GAGAGHPGA GAGAGHPGAG        | 3 | 0.026  | 0.033    | 0.002     | 0 | 20.62 | 18 | 48  | 2  | 538  | 1.1   |
| 1143.634 | 6  | Q13885_A6NK  | K.LAVNMVPPFV LAVNMVPPFR       | 2 | 0.172  | 0.002    | 0.002     | 0 | 33.26 | 19 | 72  |    |      | 1.57  |
| 1446.689 | 8  | Q13885_P0743 | K.EVDEQMLNV EVDEQMLNVQI       | 2 | 2.127  | 6.30E-06 | 0.001     | 0 | 57.43 | 18 | 57  |    |      | 0.97  |
| 2200.826 | 10 | Q13895       | R.MPQDGSDDF MPQDGS[166.9]     | 2 | 2.159  | 1.10E-06 | 7.00E-04  | 0 | 64.97 | 18 | 65  | 2  | 437  | 0.32  |
| 1648.664 | 11 | Q14004       | R.GGDVSPSPYS GGDVSP[166.99]   | 2 | 1.407  | 1.40E-04 | 0.002     | 0 | 43.62 | 17 | 44  | 3  | 1512 | 1.03  |
| 3008.191 | 17 | Q14008       | K.HSTSGTDEGE HST[181.014]S    | 3 | -0.004 | 0.03     | 0.004     | 0 | 18.28 | 16 | 18  | 1  | 2032 | 1.33  |
| 1568.724 | 12 | Q14103       | K.IFVGGSLPDTF IFVGGSL[166.9]  | 2 | 0.217  | 0.002    | 0.003     | 0 | 33.71 | 19 | 34  | 1  | 355  | 1.74  |
| 1683.704 | 14 | Q14137       | K.TTEEQVQAST TTEEQVQAST[1]    | 2 | -0.017 | 0.004    | -7.00E-04 | 0 | 29.36 | 17 | 29  | 1  | 746  | -0.41 |
| 1537.705 | 10 | Q14149       | R.RLSSQFENSIV RLS[166.9984]S  | 2 | 0.754  | 5.40E-04 | 0.002     | 1 | 38.09 | 18 | 38  | 2  | 939  | 1.16  |
| 1905.669 | 13 | Q14151       | K.MEEEGTEDN MEEEGTEDNGI       | 2 | 2.159  | 1.90E-05 | 8.00E-04  | 0 | 48.63 | 14 | 97  | 9  | 953  | 0.44  |
| 2516.083 | 15 | Q14151_Q1542 | K.EESSELEQPPA EES[166.9984]S  | 3 | -0.095 | 0.039    | 0.002     | 1 | 20.39 | 19 | 177 |    |      | 0.98  |
| 2516.083 | 13 | Q14151_Q1542 | K.EESSELEQPPA EESSELEQPPAQ    | 3 | 0.42   | 0.012    | 0.002     | 1 | 25.54 | 19 | 148 |    |      | 0.78  |
| 2387.988 | 13 | Q14151_Q1542 | K.EESSELEQPPA EESSELEQPPAQ    | 2 | 0.377  | 0.001    | 0.003     | 0 | 35.32 | 19 | 97  |    |      | 1.14  |
| 2516.083 | 11 | Q14151_Q1542 | K.EESSELEQPPA EESS[166.9984]  | 3 | -0.009 | 0.032    | 0.002     | 1 | 21.23 | 19 | 97  |    |      | 0.98  |
| 2387.988 | 14 | Q14151_Q1542 | K.EESSELEQPPA EESS[166.9984]  | 2 | 0.663  | 6.50E-04 | 0.003     | 0 | 38.18 | 19 | 97  |    |      | 1.23  |
| 995.517  | 7  | Q14151_Q1542 | K.ADSLAVVK R ADS[166.9984]    | 2 | -1.049 | 0.032    | 0.001     | 0 | 19.06 | 17 | 194 |    |      | 1.44  |
| 2387.988 | 13 | Q14151_Q1542 | K.EESSELEQPPA EES[166.9984]S  | 2 | 1.944  | 1.10E-05 | 0.003     | 0 | 55.99 | 19 | 116 |    |      | 1.23  |
| 2516.083 | 11 | Q14151_Q1542 | K.EESSELEQPPA EESSELEQPPAQ    | 3 | -0.04  | 0.037    | 0.002     | 1 | 20.55 | 19 | 102 |    |      | 0.78  |
| 2516.083 | 12 | Q14151_Q1542 | K.EESSELEQPPA EESSELEQPPAQ    | 3 | 0.165  | 0.021    | 0.002     | 1 | 23.01 | 19 | 188 |    |      | 0.78  |
| 2387.988 | 19 | Q14151_Q1542 | K.EESSELEQPPA EESSELEQPPAQ    | 3 | -0.145 | 0.048    | 0.004     | 0 | 19.92 | 19 | 130 |    |      | 1.56  |
| 2387.988 | 12 | Q14151_Q1542 | K.EESSELEQPPA EESSELEQPPAQ    | 3 | 0.066  | 0.03     | 0.004     | 0 | 22    | 19 | 177 |    |      | 1.56  |
| 1607.664 | 11 | Q14152       | K.DMDLWEQIQ DMDLWEQEQE        | 2 | 1.439  | 1.30E-04 | 0.002     | 0 | 43.94 | 17 | 44  | 1  | 1382 | 1.43  |
| 1337.657 | 5  | Q14152       | K.ERLESNIQR.I ERLES[166.998]  | 2 | -0.843 | 0.022    | 0.002     | 1 | 23.1  | 19 | 23  | 1  | 1382 | 1.31  |
| 914.398  | 5  | Q14152       | R.LGDSLSLR.K LGDSLS[166.998]  | 2 | -0.706 | 0.015    | 6.00E-04  | 0 | 23.47 | 18 | 26  | 2  | 1382 | 0.67  |
| 1416.652 | 8  | Q14157       | R.RYPSISSPQ RYPSISSS[166.2]   | 2 | -0.498 | 0.01     | 0.001     | 1 | 24.57 | 17 | 82  | 9  | 1087 | 0.74  |
| 2612.093 | 13 | Q14157       | K.STSAPQMSPC STSAPQMSPGS      | 3 | 0.6    | 0.008    | 9.00E-04  | 0 | 25.34 | 17 | 80  | 7  | 1087 | 0.34  |
| 2612.093 | 26 | Q14157       | K.STSAPQMSPC STSAPQMSPGS      | 3 | 1.224  | 1.70E-04 | 0.003     | 0 | 42.56 | 17 | 80  | 7  | 1087 | 1.03  |
| 2612.093 | 20 | Q14157       | K.STSAPQMSPC STSAPQMS[166]    | 3 | 1.256  | 1.20E-04 | 0.003     | 0 | 43.94 | 17 | 85  | 11 | 1087 | 1.03  |
| 2128.914 | 15 | Q14157       | K.NQDECVIAH NQDEC[160.03]     | 3 | -0.083 | 0.038    | 0.002     | 0 | 19.53 | 18 | 74  | 8  | 1087 | 0.95  |
| 1466.631 | 6  | Q14157       | K.NPDSAVHSP NPDS[166.998]     | 2 | -0.255 | 0.005    | 0.002     | 0 | 29    | 19 | 52  | 8  | 1087 | 1.54  |
| 1416.652 | 10 | Q14157       | R.RYPSISSPQ RYPSISS[166.9]    | 2 | -0.684 | 0.015    | 0.001     | 1 | 22.74 | 17 | 62  | 8  | 1087 | 0.74  |
| 1466.631 | 9  | Q14157       | K.NPDSAVHSP NPDSAVHVS[16]     | 2 | 0.619  | 7.30E-04 | 0.002     | 0 | 37.72 | 19 | 63  | 6  | 1087 | 1.54  |
| 2119.971 | 5  | Q14157       | K.SPAVATSTA SPAVATST[181.2]   | 2 | -1.163 | 0.048    | 0.004     | 0 | 18.9  | 18 | 71  | 12 | 1087 | 1.69  |
| 1416.652 | 5  | Q14157       | R.RYPSISSPQ RYPS[166.9984]    | 2 | -0.779 | 0.019    | 0.001     | 1 | 21.74 | 17 | 87  | 10 | 1087 | 0.74  |
| 1416.652 | 13 | Q14157       | R.RYPSISSPQ RYPSISS[166.99]   | 2 | 0.095  | 0.002    | 0.001     | 1 | 30.48 | 17 | 63  | 6  | 1087 | 0.74  |
| 1286.578 | 14 | Q14160       | R.VQSPPEPPA VQS[166.9984]     | 2 | -0.346 | 0.006    | 7.00E-04  | 0 | 28.09 | 19 | 233 | 15 | 1630 | 0.52  |
| 2423.984 | 10 | Q14160       | R.RSEACPCQC RSEAC[160.03C]    | 2 | 1.619  | 7.20E-05 | 0.002     | 1 | 47.74 | 19 | 220 | 12 | 1630 | 0.7   |
| 1256.556 | 7  | Q14160       | R.LSPDFAE.LR.[166.9984]P      | 2 | 0.24   | 0.002    | 0.002     | 0 | 32.95 | 18 | 233 | 15 | 1630 | 1.49  |
| 2267.883 | 17 | Q14160       | R.SEACPCQDPS SEAC[160.0307]   | 2 | 0.159  | 1.50E-06 | 0.001     | 0 | 61.12 | 15 | 233 | 15 | 1630 | 0.44  |
| 1011.451 | 6  | Q14160       | K.SLEQDALR.A S[166.9984]LEC   | 2 | -0.863 | 0.022    | 3.00E-04  | 0 | 22.92 | 19 | 233 | 15 | 1630 | 0.26  |
| 1300.578 | 9  | Q14160       | R.NSLEISSIDR. NSLES[166.998]  | 2 | 1.634  | 7.10E-05 | 0.002     | 0 | 46.87 | 18 | 234 | 12 | 1630 | 1.53  |
| 1567.763 | 8  | Q14160       | R.QSPAPPPPLG QSPAS[166.998]   | 2 | 0.54   | 9.90E-04 | 0.002     | 0 | 35.95 | 18 | 233 | 15 | 1630 | 1.26  |
| 2423.984 | 12 | Q14160       | R.RSEACPCQC RSEAC[160.03C]    | 2 | 2.159  | 3.60E-06 | 0.002     | 1 | 60.71 | 19 | 233 | 15 | 1630 | 0.7   |
| 2609.195 | 20 | Q14160       | R.MVEPENAVT MVEPENAVTIT       | 3 | 0.666  | 0.007    | 0.005     | 0 | 27.01 | 18 | 216 | 12 | 1630 | 1.77  |
| 1300.578 | 9  | Q14160       | R.NSLEISSIDR. NS[166.9984]L   | 2 | 0.697  | 6.10E-04 | 0.002     | 0 | 37.52 | 18 | 216 | 12 | 1630 | 1.53  |
| 2964.219 | 24 | Q14160       | K.MAESPCSPG MAESP[160.03]     | 3 | 0.019  | 0.029    | 0.002     | 0 | 20.53 | 18 | 182 | 11 | 1630 | 0.81  |
| 1555.763 | 7  | Q14160       | R.LRVQSPPEPA LRVQSP[166.998]  | 2 | -0.477 | 0.009    | 0.001     | 1 | 25.77 | 18 | 170 | 12 | 1630 | 0.9   |
| 1300.578 | 8  | Q14160       | R.NSLEISSIDR. NSLES[166.9]    | 2 | 1.279  | 1.60E-04 | 0.002     | 0 | 43.37 | 18 | 222 | 11 | 1630 | 1.53  |
| 2267.883 | 9  | Q14160       | R.SEACPCQDPS SEAC[160.0307]   | 2 | 2.021  | 5.10E-06 | 0.001     | 0 | 55.83 | 15 | 222 | 11 | 1630 | 0.44  |
| 2964.219 | 11 | Q14160       | K.MAESPCSPG MAESP[160.03]     | 3 | -0.026 | 0.032    | 0.002     | 0 | 20.1  | 18 | 222 | 11 | 1630 | 0.81  |
| 936.455  | 4  | Q14160       | R.ALSPAELR.A ALS[166.9984]F   | 2 | -0.985 | 0.029    | 6.00E-04  | 0 | 20.68 | 18 | 234 | 13 | 1630 | 0.66  |
| 1280.636 | 4  | Q14160       | K.RVSLVGGADD RVSLV[166.9984]  | 2 | -0.853 | 0.023    | 0.002     | 1 | 26    | 22 | 234 | 13 | 1630 | 1.3   |
| 2964.219 | 11 | Q14160       | K.MAESPCSPG MAESP[160.03]     | 3 | 0.86   | 0.004    | 0.002     | 0 | 28.96 | 18 | 152 | 11 | 1630 | 0.81  |
| 2085.862 | 20 | Q14165       | K.EEEEEEEFY EEEEEEEFYDE       | 3 | 1.291  | 1.50E-04 | 0.002     | 1 | 43.67 | 18 | 44  | 1  | 292  | 1.06  |
| 1297.619 | 13 | Q14186       | K.VFIDQNLSPGI VFIDQNL[166.2]  | 2 | 2.159  | 1.90E-06 | 0.002     | 0 | 61.95 | 17 | 62  | 1  | 410  | 1.48  |
| 1804.827 | 13 | Q14202       | K.TGSPGPELLH TGS[166.9984]    | 2 | -0.857 | 0.024    | 0.001     | 0 | 22.97 | 19 | 31  | 3  | 1370 | 0.69  |
| 1559.631 | 8  | Q14204       | R.TDSTSGRRPA TDS[166.9984]    | 2 | -1.022 | 0.032    | 0.002     | 0 | 18.32 | 16 | 18  | 2  | 4646 | 1.27  |
| 1106.481 | 7  | Q14207       | K.AHASLMSPGI AHASLMS[166.2]   | 2 | -0.682 | 0.016    | 6.00E-04  | 0 | 19.71 | 14 | 20  | 1  | 1427 | 0.52  |
| 1046.459 | 5  | Q14244       | R.SVSTMNLK.S SVS[166.9984]I   | 2 | -1.145 | 0.048    | 5.00E-04  | 0 | 15.1  | 14 | 15  | 1  | 749  | 0.51  |
| 1590.709 | 7  | Q14247       | R.LPSSPVYEDAJ LPSS[166.9984]  | 2 | 0.174  | 0.024    | 0.002     | 0 | 23.06 | 19 | 106 | 8  | 550  | 1     |
| 1894.798 | 8  | Q14247       | K.TQTPPVSPAP T[181.014]QIP    | 2 | 1.216  | 1.70E-04 | 0.002     | 0 | 42.71 | 18 | 106 | 8  | 550  | 1.08  |
| 1590.709 | 10 | Q14247       | R.LPSSPVYEDAJ LPS[166.9984]S  | 2 | 1.096  | 2.60E-04 | 0.003     | 0 | 42.51 | 19 | 113 | 4  | 550  | 2.01  |
| 1814.832 | 10 | Q14247       | K.TQTPPVSPAP TQT[181.014]P    | 2 | 0.593  | 8.20E-04 | 0.002     | 0 | 36.48 | 18 | 113 | 4  | 550  | 1.14  |
| 1814.832 | 10 | Q14247       | K.TQTPPVSPAP TQTPPV[166.9]    | 2 | 0.496  | 0.001    | 0.002     | 0 | 35.49 | 18 | 156 | 9  | 550  | 0.87  |
| 1894.798 | 10 | Q14247       | K.TQTPPVSPAP TQT[181.014]P    | 2 | 2.197  | 6.90E-06 | 0.002     | 0 | 56.71 | 18 | 156 | 9  | 550  | 1.08  |
| 1905.798 | 9  | Q14258       | R.ASAPSPNAQI ASAPS[166.998]   | 2 | 1.276  | 1.70E-04 | -6.00E-04 | 0 | 41.31 | 16 | 41  | 2  | 630  | -0.31 |
| 1389.454 | 7  | Q14493       | R.CDGDASPPSP C[160.0307]DG    | 2 | -0.913 | 0.023    | 0.003     | 0 | 16.42 | 13 | 16  | 1  | 270  | 2.11  |
| 1134.498 | 6  | Q14498       | R.YRSPYSGPK.F Y[243.0297]RS   | 3 | 0.469  | 0.01     | 0.002     | 1 | 25.01 | 18 | 92  | 6  | 530  | 1.39  |
| 1831.859 | 12 | Q14498       | K.SPVREPIDLNT S[166.9984]PVI  | 3 | 1.22   | 0.002    | 0.003     | 1 | 32.52 | 18 | 92  | 6  | 530  | 1.5   |
| 944.496  | 7  | Q14498       | K.IGLPHSILK IGLPHS[166.99]    | 2 | 0.57   | 8.80E-04 | 5.00E-04  | 0 | 36.25 | 18 | 90  | 5  | 530  | 0.56  |
| 1134.498 | 6  | Q14498       | R.YRSPYSGPK.F YRS[166.9984]I  | 2 | -0.536 | 0.01     | 0.002     | 1 | 25.18 | 18 | 96  | 5  | 530  | 1.57  |
| 1698.795 | 10 | Q14541       | R.QISVSPGSSQI QISVSS[166.99]  | 2 | -0.615 | 0.014    | 0.001     | 0 | 24.38 | 18 | 24  | 1  | 408  | 0.83  |
| 1892.864 | 8  | Q14542       | K.AELLQSDENG AELLQSDENGIP     | 2 | -0.751 | 0.019    | 0.002     | 0 | 23.02 | 18 | 23  | 2  | 456  | 0.9   |
| 1116.447 | 6  | Q14562       | K.QSMDMSPIK. QSMDMS[166.9]    | 2 | -0.726 | 0.016    | 0.001     | 0 | 21.29 | 16 | 21  | 1  | 1220 | 1.27  |
| 1856.805 | 8  | Q14566       | K.EIESEIDSEEL EIESEIDS[166.9] | 2 | 0.742  | 6.10E-04 | 9.00E-04  | 0 | 37.97 | 18 | 38  | 2  | 821  | 0.48  |
| 1927.769 | 13 | Q14568       | K.DKPEIEDVGS DKPEIEDVGS[1]    | 2 | 0.677  | 7.00E-04 | 6.00E-04  | 0 | 37.32 | 18 | 111 | 4  | 343  | 0.32  |
| 2055.864 | 15 | Q14568       | K.DKPEIEDVGS DKPEIEDVGS[1]    | 3 | 0.269  | 0.019    | 0.003     | 1 | 22.05 | 17 | 107 | 5  | 343  | 1.25  |
| 1362.63  | 9  | Q14669       | R.SESPAPLPSL SES[166.9984]F   | 2 | 0.965  | 3.60E-04 | 0.002     | 0 | 39.27 | 17 | 39  | 2  | 1992 | 1.58  |
| 1518.731 | 9  | Q14669       | R.RSESPAPLPS RSE[166.9984]    | 2 | -0.953 | 0.028    | 0.002     | 1 | 21    | 18 | 43  | 4  | 1992 | 1.61  |
| 1421.631 | 5  | Q14671       | R.RDSLITGSSDL RDS[166.9984]   | 2 | 0.751  | 5.30E-04 | 0.001     | 1 | 39.06 | 19 | 39  | 2  | 1186 | 0.71  |
| 2530.109 | 24 | Q14676       | R.GPGAPGLAHI GPGAPGLAHL       | 3 | 1.256  | 1.30E-04 | 0.003     | 0 | 43.91 | 18 | 84  | 5  | 2089 | 1.06  |
| 2703.291 | 9  | Q14676       | K.TREPVPPTAP T[181.014]PEPI   | 3 | -0.01  | 0.031    | 0         |   |       |    |     |    |      |       |

|          |    |              |                                  |        |          |           |   |       |    |     |    |      |       |
|----------|----|--------------|----------------------------------|--------|----------|-----------|---|-------|----|-----|----|------|-------|
| 1479.734 | 8  | Q14839       | K.SAIDLTPVVEI S[166.9984]AIC 2   | -0.886 | 0.024    | 0.003     | 0 | 20.69 | 17 | 62  | 8  | 1912 | 1.96  |
| 2383.001 | 28 | Q14839       | K.STAPETAIECT STAPETAIEC]1€ 3    | 0.576  | 0.01     | 0.001     | 0 | 26.1  | 18 | 70  | 5  | 1912 | 0.52  |
| 1942.853 | 14 | Q14839       | K.IEENSLKEEESI IEENS[166.998- 3  | 0.069  | 0.027    | 0.002     | 1 | 23.04 | 20 | 56  | 6  | 1912 | 0.82  |
| 2665.239 | 22 | Q14839       | K.TPTPSTPGDTI T[181.014]PTP 3    | 0.989  | 0.003    | 0.004     | 0 | 30.25 | 18 | 51  | 5  | 1912 | 1.54  |
| 2665.239 | 7  | Q14839       | K.TPTPSTPGDTI TPT[181.014]P 3    | 0.924  | 0.004    | 0.004     | 0 | 29.58 | 18 | 123 | 9  | 1912 | 1.54  |
| 2665.239 | 9  | Q14839       | K.TPTPSTPGDTI TPTPSTPGDT]1 3     | 0.279  | 0.017    | 0.004     | 0 | 23.14 | 18 | 56  | 6  | 1912 | 1.54  |
| 2665.239 | 9  | Q14839       | K.TPTPSTPGDTI TPTPSTPGDTQ] 3     | 0.064  | 0.031    | 0.003     | 0 | 20.01 | 17 | 67  | 6  | 1912 | 1.16  |
| 1765.624 | 7  | Q14974       | K.QDENDDDDDD QDENDDDDDD]A 2      | 1.964  | 3.30E-05 | 3.00E-04  | 0 | 47.19 | 15 | 47  | 1  | 876  | 0.16  |
| 1117.548 | 6  | Q14978       | R.DNQLSEVANI DNQLSEVANK 2        | 0.11   | 0.003    | 5.00E-04  | 0 | 30.65 | 17 | 31  | 1  | 699  | 0.48  |
| 1798.848 | 12 | Q14980       | K.RVSLPHQGP RVSL[166.9984] 3     | -0.084 | 0.038    | 0.001     | 1 | 21.5  | 20 | 64  | 6  | 2115 | 0.7   |
| 1642.747 | 11 | Q14980       | R.VSLEPHQGG VSLPHQGGT] 2         | -0.169 | 0.005    | 0.001     | 0 | 28.86 | 18 | 82  | 6  | 2115 | 0.71  |
| 2003.907 | 12 | Q14980       | R.TQPDGTSVPC TQPDGTSVPGE 2       | 2.024  | 1.20E-05 | 0.002     | 0 | 54.62 | 18 | 62  | 3  | 2115 | 0.8   |
| 1272.594 | 10 | Q14C86       | R.SRSSDIVSSVR SRS[166.9984] 2    | 0.361  | 0.002    | 0.002     | 1 | 34.16 | 18 | 34  | 3  | 1478 | 1.29  |
| 2248.927 | 21 | Q14C86       | R.LQLELESCGL LQLELESC[160.0 2    | -0.83  | 0.02     | -5.00E-04 | 0 | 20.23 | 16 | 52  | 4  | 1478 | -0.24 |
| 2248.927 | 12 | Q14C86       | R.LQLELESCGL LQLELESC[160.0 3    | 0.55   | 0.01     | 0.002     | 0 | 23.86 | 16 | 52  | 4  | 1478 | 0.74  |
| 2195     | 11 | Q14C50       | K.LGSLTPEIVSTI LGSILTPEIVSTPS 2  | 0.938  | 3.40E-04 | 0.002     | 0 | 40.93 | 19 | 41  | 2  | 331  | 0.98  |
| 2195     | 10 | Q14C50       | K.LGSLTPEIVSTI LGSILTPEIVSTPS 2  | 0.275  | 0.002    | 0.002     | 0 | 34.3  | 19 | 34  | 3  | 331  | 0.98  |
| 1932.786 | 13 | Q14CW9       | R.LQWDGSSDL LQWDGSSDLS] 2        | 2.159  | 5.70E-06 | 0.002     | 0 | 57.05 | 17 | 57  | 2  | 347  | 0.79  |
| 1945.745 | 10 | Q15007       | R.EGNTTDDFF EGNTTDDFFS] 2        | 2.159  | 4.60E-06 | 0.001     | 0 | 57.19 | 16 | 57  | 1  | 396  | 0.65  |
| 1945.745 | 10 | Q15007       | R.EGNTTDDFF EGNTTDDFFS] 2        | -0.331 | 0.007    | 0.001     | 0 | 25.23 | 16 | 65  | 2  | 396  | 0.65  |
| 1588.677 | 11 | Q15008       | R.DNNMAPYDE DNNMAPYEA] 2         | -1.206 | 0.046    | 0.003     | 0 | 18.47 | 18 | 18  | 1  | 389  | 1.89  |
| 1180.499 | 3  | Q15014       | R.SAENPPSGSV SAENPPSGS[16 2      | -1.127 | 0.045    | 0.002     | 0 | 16.26 | 15 | 16  | 1  | 288  | 1.54  |
| 2002.795 | 14 | Q15019       | K.IYHLPDAESDI YHLPDAES[166 3     | 0.525  | 0.01     | 0.004     | 0 | 26.59 | 19 | 51  | 3  | 361  | 2.23  |
| 2187.959 | 8  | Q15021       | R.YQPLASTASD YQPLASTAS[16] 2     | 2.159  | 2.20E-06 | 0.004     | 0 | 61.38 | 17 | 61  | 1  | 1401 | 2.01  |
| 2187.959 | 8  | Q15021       | R.YQPLASTASD YQPLAST[181.0 3     | 1.037  | 0.003    | 0.002     | 0 | 30.74 | 18 | 75  | 3  | 1401 | 1     |
| 2150.858 | 7  | Q15022       | K.ASMSEFLESI ASMSEFLES[16] 2     | 0.693  | 7.00E-04 | -0.001    | 0 | 35.51 | 16 | 36  | 1  | 739  | -0.44 |
| 1455.673 | 9  | Q15032       | K.AASTDLGAGI AAST[181.014] 2     | 2.159  | 1.10E-05 | 0.002     | 0 | 54.91 | 18 | 55  | 3  | 1099 | 1.59  |
| 1455.673 | 9  | Q15032       | K.AASTDLGAGI AAS[166.9984] 2     | 2.197  | 8.50E-06 | 0.002     | 0 | 56.02 | 18 | 56  | 1  | 1099 | 1.59  |
| 2049.855 | 16 | Q15032       | K.YSEPRVWST YSEPRVWST]1 3        | 0.251  | 0.017    | 0.002     | 0 | 22.87 | 18 | 65  | 3  | 1099 | 1.06  |
| 1362.63  | 7  | Q15036       | K.SPPLLESPDAT SPPLLESPDAT]P 2    | -0.526 | 0.012    | 7.00E-04  | 0 | 24.28 | 17 | 25  | 5  | 470  | 0.54  |
| 1362.63  | 8  | Q15036       | K.SPPLLESPDAT SPPLLES[166.9 2    | -0.798 | 0.021    | 0.002     | 0 | 21.55 | 17 | 26  | 3  | 470  | 1.35  |
| 1803.816 | 5  | Q15042       | K.KTASADVTNIN KTASADVTN] 3       | 0.089  | 0.027    | 0.003     | 1 | 19.21 | 16 | 78  | 2  | 981  | 1.53  |
| 1803.816 | 4  | Q15042       | K.KTASADVTNIN KTASADVT[181 3     | 0.351  | 0.015    | 0.003     | 1 | 21.87 | 16 | 67  | 2  | 981  | 1.53  |
| 1110.469 | 7  | Q15052,Q1415 | R.MSGFYQK MS[166.9984]C 2        | 2.159  | 2.90E-06 | 0.001     | 0 | 58.69 | 16 | 59  | 2  | 1113 | 1.13  |
| 1233.54  | 8  | Q15059       | R.SESPPLSDPK SES[166.9984]F 2    | 0.059  | 0.002    | 0.002     | 0 | 33.14 | 20 | 33  | 2  | 726  | 1.42  |
| 1396.648 | 10 | Q15084       | K.DWIELTDDSF DWIELTDDSF]D 2      | 1.677  | 6.40E-05 | 0.002     | 0 | 48.32 | 19 | 48  | 1  | 440  | 1.55  |
| 1152.518 | 7  | Q15121       | R.QPSEEHIL QPS[166.9984] 2       | -1.016 | 0.032    | 2.00E-04  | 0 | 21.37 | 19 | 21  | 1  | 130  | 0.2   |
| 1953.905 | 9  | Q15139       | R.TSSAELTSAF TSS[166.9984]F 2    | 0.655  | 7.10E-04 | 0.002     | 0 | 36.1  | 17 | 36  | 1  | 912  | 1.27  |
| 1047.466 | 5  | Q15149       | R.SWSLATFR.T SWS[166.9984] 2     | -0.836 | 0.021    | 7.00E-04  | 0 | 23.19 | 19 | 380 | 25 | 4684 | 0.66  |
| 1350.556 | 9  | Q15149       | R.DSQDAGGFG DSQDAGGFG]P 2        | 0.798  | 5.20E-04 | 8.00E-04  | 0 | 37.53 | 17 | 503 | 28 | 4684 | 0.61  |
| 1129.585 | 7  | Q15149       | K.NLDEELQR.L NLDEELQR 2          | 0.259  | 0.002    | 0.001     | 0 | 32.14 | 17 | 503 | 28 | 4684 | 1.2   |
| 2061.974 | 10 | Q15149       | K.ELEEVSPETPV ELEEVSPET[166.99 2 | 0.551  | 8.40E-04 | 0.002     | 0 | 35.06 | 17 | 503 | 28 | 4684 | 1.12  |
| 1559.758 | 13 | Q15149       | R.SLQEEHVAVA S[166.9984]LQ] 3    | 1.291  | 1.10E-05 | 0.001     | 0 | 55.26 | 18 | 503 | 28 | 4684 | 0.82  |
| 2069.941 | 10 | Q15149       | K.AYSDPSTGEP AYSDPSTGEP]A 2      | -1.169 | 0.048    | 1.00E-04  | 0 | 17.86 | 17 | 503 | 28 | 4684 | 0.03  |
| 1428.708 | 8  | Q15149       | K.QEELQLEQC QEELQLEQC]R 2        | 2.159  | 1.10E-05 | -4.00E-04 | 0 | 53.7  | 16 | 503 | 28 | 4684 | -0.29 |
| 1416.685 | 8  | Q15149       | R.LEDLQDAQD LEDLQDAQDE] 2        | 1.943  | 4.00E-05 | 0.002     | 0 | 48.98 | 17 | 503 | 28 | 4684 | 1.3   |
| 2096.952 | 9  | Q15149       | R.DALDGPAAE DALDGPAAEA 3         | 0.352  | 0.015    | 0.003     | 0 | 24.84 | 19 | 503 | 28 | 4684 | 1.37  |
| 1512.693 | 13 | Q15149       | K.DTHDQLSEPS DTHDQLSEPS]E 3      | -0.084 | 0.038    | 0.002     | 0 | 20.48 | 19 | 503 | 28 | 4684 | 1     |
| 1862.759 | 12 | Q15149       | K.GYSPYSVSG GYSPYSVSG]C 2        | 2.159  | 2.10E-05 | 0.002     | 0 | 50.4  | 16 | 503 | 28 | 4684 | 0.83  |
| 1834.822 | 12 | Q15149       | R.SSSVSSSSVP SSSVSSSSVP]S 2      | 2.159  | 1.40E-05 | 0.002     | 0 | 54.49 | 18 | 503 | 28 | 4684 | 0.84  |
| 1914.788 | 9  | Q15149       | R.SSSVSSSSVP S[166.9984]SV 2     | 1.225  | 1.80E-04 | 6.00E-04  | 0 | 42.78 | 18 | 431 | 30 | 4684 | 0.33  |
| 2061.974 | 6  | Q15149       | K.ELEEVSPETPV ELEEVSPET[181 2    | -1.059 | 0.034    | 0.002     | 0 | 18.96 | 17 | 380 | 25 | 4684 | 1.12  |
| 1942.726 | 7  | Q15149       | K.GYSPYSVSG GYSPYSVSG]S 2        | -0.33  | 0.007    | 2.00E-04  | 0 | 24.25 | 15 | 503 | 28 | 4684 | 0.11  |
| 1834.822 | 15 | Q15149       | R.SSSVSSSSVP SSS[166.9984]V 2    | 2.159  | 1.50E-06 | 0.001     | 0 | 63.53 | 18 | 503 | 28 | 4684 | 0.79  |
| 1914.788 | 7  | Q15149       | R.SSSVSSSSVP SSS[166.9984]V 2    | -0.638 | 0.013    | 6.00E-04  | 0 | 24.17 | 18 | 380 | 25 | 4684 | 0.33  |
| 1198.554 | 7  | Q15149       | K.QITMEEIVR S QIT[181.014]M 2    | 0.177  | 0.002    | 0.002     | 0 | 31.32 | 17 | 422 | 25 | 4684 | 1.4   |
| 1240.521 | 7  | Q15149       | R.SDEGLSPAT SDEGLSPAT]E 2        | 1.494  | 1.10E-04 | 0.002     | 0 | 43.48 | 16 | 369 | 25 | 4684 | 1.52  |
| 1914.788 | 13 | Q15149       | R.SSSVSSSSVP SSS[166.9984]V 2    | 2.024  | 2.60E-05 | 4.00E-04  | 0 | 51.28 | 18 | 422 | 25 | 4684 | 0.22  |
| 1486.713 | 7  | Q15149       | R.QQEELLAEN QQEELLAEN]Q 2        | 0.216  | 0.002    | 0.003     | 0 | 33.7  | 19 | 369 | 25 | 4684 | 1.76  |
| 1942.726 | 18 | Q15149       | K.GYSPYSVSG GYSPYSVSG]C 2        | -0.124 | 0.004    | 2.00E-04  | 0 | 26.3  | 15 | 369 | 25 | 4684 | 0.11  |
| 1190.582 | 6  | Q15149       | K.AQLEPVASPA AQLEPVAS[166 2      | 0.058  | 0.002    | 0.002     | 0 | 31.16 | 18 | 351 | 22 | 4684 | 1.31  |
| 1942.726 | 7  | Q15149       | K.GYSPYSVSG GYSPYSVSG]C 2        | 0.965  | 3.60E-04 | 2.00E-04  | 0 | 37.19 | 15 | 499 | 26 | 4684 | 0.11  |
| 1834.822 | 11 | Q15149       | R.SSSVSSSSVP SSSVSG[166.99 2     | 1.223  | 1.80E-04 | 0.001     | 0 | 42.76 | 18 | 431 | 30 | 4684 | 0.79  |
| 1143.6   | 7  | Q15149       | R.LQAEVAQQI LQAEVAQQ 2           | -1.166 | 0.048    | 0.001     | 0 | 18.9  | 18 | 386 | 23 | 4684 | 1.23  |
| 1357.696 | 7  | Q15149       | R.QEQALLEEF QEQALLEEF 2          | -0.755 | 0.017    | 0.002     | 0 | 22.98 | 18 | 431 | 30 | 4684 | 1.08  |
| 1322.659 | 13 | Q15149       | R.SQVEEELFSV SQVEEELFSV 2        | -0.762 | 0.02     | 0.002     | 0 | 20.93 | 16 | 503 | 28 | 4684 | 1.47  |
| 1570.807 | 9  | Q15149       | R.DDGTGQLLP DDGTGQLLP]S 2        | -0.524 | 0.01     | 0.004     | 0 | 23.29 | 16 | 431 | 30 | 4684 | 2.4   |
| 1160.468 | 7  | Q15149,P5810 | R.GYFDEEMNR GYFDEEMNR 2          | 0.208  | 0.002    | 0.003     | 0 | 32.61 | 18 | 528 | 26 | 2.69 | 2.69  |
| 1448.635 | 9  | Q15154       | R.WVSELYVEE WVSELS[166.9 2       | -0.998 | 0.029    | 0.004     | 0 | 20.57 | 18 | 44  | 7  | 2024 | 2.71  |
| 1849.775 | 15 | Q15154       | R.YMSQMSVPE YMSQMS[166.5 2       | -1.143 | 0.041    | 0.003     | 0 | 19.1  | 18 | 50  | 8  | 2024 | 1.39  |
| 1919.791 | 9  | Q15154       | R.ILEDHGSFAG ILEDHGS[166.9 3     | 0.5    | 0.011    | 0.002     | 0 | 25.32 | 18 | 44  | 7  | 2024 | 1.2   |
| 1849.775 | 12 | Q15154       | R.YMSQMSVPE YMS[166.9984] 2      | 0.228  | 0.002    | 0.003     | 0 | 32.83 | 18 | 54  | 7  | 2024 | 1.39  |
| 1750.812 | 10 | Q15154       | K.RVTNDISPES RVTNDISP[166.9 2    | -0.725 | 0.016    | 0.001     | 1 | 24.28 | 19 | 58  | 8  | 2024 | 0.76  |
| 989.434  | 6  | Q15154       | K.KFVGESDK.R KFGVES[166.99 2     | -1.134 | 0.043    | 0.002     | 1 | 20.19 | 19 | 70  | 7  | 2024 | 1.88  |
| 2133.864 | 15 | Q15181       | K.HTGCCGDND HTGC[160.030] 3      | 1.291  | 1.90E-04 | 0.002     | 0 | 41.36 | 17 | 41  | 1  | 289  | 0.92  |
| 1955.627 | 17 | Q15185       | K.DWEDDSDED DWEDDS[166.5 2       | 2.119  | 1.30E-08 | 0.003     | 0 | 78.72 | 13 | 223 | 5  | 160  | 1.73  |
| 1875.661 | 9  | Q15185       | K.DWEDDSDED DWEDDS]EDM 2         | 2.159  | 3.70E-07 | 0.002     | 0 | 65.23 | 13 | 216 | 5  | 160  | 1.34  |
| 1139.571 | 7  | Q15311       | K.IAQEIASLSK I AQEIASLS[166 2    | 0.288  | 0.002    | 0.001     | 0 | 33.41 | 18 | 66  | 4  | 655  | 1.11  |
| 1255.545 | 8  | Q15311       | R.TPSSSEISPTK TPS[166.9984] 2    | -0.441 | 0.009    | 9.00E-04  | 0 | 26.14 | 18 | 47  | 4  | 655  | 0.69  |
| 2590.135 | 13 | Q15311       | R.TGPEPSPHDI TGPEPSPHDI]H 3      | 0.2    | 0.023    | 0.002     | 0 | 21.35 | 17 | 65  | 5  | 655  | 0.74  |
| 1487.662 | 7  | Q15345       | R.STQESLTAGG ST[181.014]QE] 2    | 1.254  | 1.60E-04 | 0.003     | 0 | 44.09 | 19 | 66  | 4  | 812  | 1.75  |
| 1537.737 | 11 | Q15345       | R.APSRDEGLSI APS[166.9984] 3     | 1.067  | 0.003    | 0.001     | 1 | 32.01 | 19 | 64  | 4  | 812  | 0.79  |
| 1487.662 | 12 | Q15345       | R.STQESLTAGG S[166.9984]TQ] 2    | 1.743  | 5.10E-05 | 0.003     | 0 | 49.01 | 19 | 61  | 4  | 812  | 1.75  |
| 1455.625 | 6  | Q15388       | R.IVSAQSLAEDI VSAQS[166.99 2     | 0.075  | 0.002    | 0.002     | 0 | 30.3  | 17 | 30  | 1  | 145  | 1.41  |
| 1804.873 | 9  | Q15390       | R.QISPLDSQEE QIS[166.9984] 2     | -0.701 | 0.016    | 0.002     | 0 | 23.52 | 18 | 24  | 1  | 333  | 1.33  |
| 1700.737 | 10 | Q15398       | K.NTASQNSILEI NTASQNS[166 2      | -0.093 | 0.004    | 3.00E-04  | 0 | 28.6  | 17 | 29  | 2  | 846  | 0.16  |
| 2644.196 | 12 | Q15398       | R.SSIEDAQCPG S[16                |        |          |           |   |       |    |     |    |      |       |

|          |    |              |                                  |        |          |          |   |       |    |     |    |      |       |
|----------|----|--------------|----------------------------------|--------|----------|----------|---|-------|----|-----|----|------|-------|
| 1578.698 | 6  | Q15678       | K.ICTEQSNPPF IC[160.0307]TE 2    | 1.099  | 2.30E-04 | 0.001    | 0 | 42.54 | 19 | 43  | 2  | 1187 | 0.66  |
| 1578.698 | 6  | Q15678       | K.ICTEQSNPPF IC[160.0307]TE 2    | -0.448 | 0.008    | 0.001    | 0 | 27.05 | 19 | 27  | 1  | 1187 | 0.66  |
| 1058.455 | 8  | Q15696       | R.DIYLSPPDR.T DIYLS[166.9984] 2  | -1.205 | 0.045    | 0.001    | 0 | 17.5  | 17 | 18  | 1  | 482  | 0.95  |
| 1429.728 | 8  | Q15714       | K.NSQLEQENNI NSQLEQENLLU 2       | 2.159  | 3.60E-06 | 0.002    | 0 | 60.16 | 18 | 60  | 1  | 1073 | 1.4   |
| 1674.712 | 5  | Q15742       | R.APSPTAEQPP AS[166.9984] 2      | -0.338 | 0.007    | -0.002   | 0 | 16.7  | 17 | 26  | 2  | 525  | -1.26 |
| 1223.592 | 6  | Q15758       | R.STEPELQVQK:ST[181.014]EP 2     | -0.358 | 0.008    | 0.001    | 0 | 26.97 | 18 | 27  | 1  | 541  | 1.16  |
| 1349.61  | 6  | Q15773       | R.LAIQGPEDSP:LAIQGPEDS[16] 2     | -0.676 | 0.014    | 7.00E-04 | 0 | 24.79 | 19 | 25  | 1  | 248  | 0.55  |
| 1251.573 | 7  | Q15785       | K.NRVPSAGDVI NRVPS[166.998] 2    | -1.021 | 0.035    | 8.00E-04 | 1 | 20.34 | 18 | 20  | 3  | 309  | 0.65  |
| 1650.656 | 9  | Q15811       | K.STMSDSSGSE STS[166.9984] 2     | 1.153  | 2.30E-04 | 0.002    | 0 | 40.06 | 16 | 40  | 1  | 1721 | 0.96  |
| 1357.638 | 11 | Q15819       | K.LPQPPEGGQTY LPQPPEGGQTY 2      | 0.086  | 0.003    | 0.003    | 0 | 31.39 | 18 | 31  | 1  | 145  | 1.95  |
| 1595.685 | 10 | Q15942       | K.FSPGAPGGSC FS[166.9984]PC 2    | 0.232  | 0.002    | 1.00E-04 | 0 | 31.87 | 17 | 49  | 2  | 572  | 0.08  |
| 1117.565 | 6  | Q15942       | R.SPGAPGPTLU S[166.9984]PG. 2    | 0.424  | 0.001    | 0.001    | 0 | 34.79 | 18 | 49  | 2  | 572  | 1.17  |
| 1269.518 | 8  | Q16181       | K.SPLAQMEEPF S[166.9984]PL 2     | 0.888  | 4.30E-04 | 0.002    | 0 | 39.43 | 18 | 39  | 3  | 437  | 1.54  |
| 1343.635 | 14 | Q16204       | K.LDQPVASAPP LQDPVASAPP[1] 2     | 0.991  | 2.90E-04 | 0.002    | 0 | 41.46 | 19 | 136 | 6  | 474  | 1.42  |
| 1834.705 | 11 | Q16204       | R.QLSESSLELV QLS[166.9984] 2     | 2.159  | 6.20E-08 | 0.002    | 0 | 76.69 | 17 | 136 | 6  | 474  | 1.04  |
| 1423.602 | 6  | Q16204       | K.LDQPVASAPP LQDPV[166.99] 2     | -0.638 | 0.015    | 6.00E-04 | 0 | 23.17 | 17 | 112 | 4  | 474  | 0.41  |
| 1112.55  | 6  | Q16204       | K.SGGVIVSPPR.L SGGVIVS[166.99] 2 | -0.796 | 0.018    | 0.002    | 0 | 23.57 | 19 | 106 | 4  | 474  | 1.45  |
| 1441.621 | 6  | Q16512       | K.LNLGTDSDSSI LNLGTDSDS[16] 2    | -0.345 | 0.007    | 0.002    | 0 | 26.1  | 17 | 26  | 2  | 942  | 1.64  |
| 1441.621 | 15 | Q16512       | K.LNLGTDSDSSI LNLGTDSDS[1] 2     | 0.262  | 0.002    | 0.002    | 0 | 32.15 | 17 | 32  | 1  | 942  | 1.64  |
| 1572.679 | 9  | Q16513       | R.ASSLGEIDESS ASS[166.9984] 2    | 2.159  | 1.80E-05 | 0        | 0 | 52.2  | 17 | 52  | 2  | 984  | -0.03 |
| 1322.635 | 5  | Q16514       | R.LSPENNVQLT LS[166.9984]PE 2    | -0.161 | 0.005    | 8.00E-04 | 0 | 29.94 | 19 | 30  | 1  | 161  | 0.57  |
| 1655.581 | 9  | Q16539       | R.HTDDEMTGY HTDDEMT[18] 2        | 0.932  | 3.80E-04 | 0.002    | 0 | 34.86 | 13 | 35  | 1  | 360  | 1.31  |
| 1575.615 | 13 | Q16539       | R.HTDDEMTGY HTDDEMTGY[2] 3       | 0.32   | 0.016    | 0.001    | 0 | 21.54 | 16 | 22  | 1  | 360  | 0.88  |
| 1134.476 | 6  | Q16611       | -M.ASGQGPMP MAS[166.9984] 3      | 0.421  | 0.012    | 0.002    | 0 | 20.57 | 14 | 21  | 1  | 211  | 1.53  |
| 1353.536 | 10 | Q16625       | R.YSSGQGFETP YSS[166.9984]C 2    | 0.489  | 0.001    | 0.001    | 0 | 32.42 | 15 | 32  | 1  | 522  | 0.71  |
| 2016.843 | 10 | Q16637       | R.GTGQSDSDSI GTGQS[166.99] 2     | 2.159  | 1.30E-09 | 0.003    | 0 | 94.65 | 18 | 95  | 1  | 294  | 1.29  |
| 2016.843 | 10 | Q16637       | R.GTGQSDSDSI GT[181.014]GC 2     | 2.274  | 1.00E-08 | 0.003    | 0 | 85.57 | 18 | 97  | 2  | 294  | 1.29  |
| 2016.843 | 7  | Q16637       | R.GTGQSDSDSI GTGQSDSDS[16] 3     | 0.969  | 0.004    | 0.003    | 0 | 29.04 | 17 | 97  | 2  | 294  | 1.59  |
| 1941.844 | 12 | Q16643       | R.SPSDSTASTF SPS[166.9984]C 2    | 2.119  | 3.30E-07 | 0.001    | 0 | 71.41 | 19 | 86  | 2  | 649  | 0.51  |
| 988.498  | 6  | Q16643       | R.LSSPVLH.R LSS[166.9984]P 2     | -0.101 | 0.004    | 8.00E-04 | 0 | 27.54 | 16 | 90  | 2  | 649  | 0.77  |
| 1941.844 | 13 | Q16643       | R.SPSDSTASTF S[166.9984]PS 2     | 2.025  | 6.60E-10 | 0.001    | 0 | 98.42 | 19 | 111 | 2  | 649  | 0.51  |
| 1156.576 | 10 | Q16649       | K.GPHHSVELK.I GPHHS[166.998] 2   | -0.037 | 0.004    | 0.001    | 0 | 31.18 | 19 | 47  | 4  | 462  | 1.22  |
| 1158.511 | 6  | Q16649       | K.LSSPIDMTSK.L LSS[166.9984]P 2  | -0.037 | 0.003    | 0.001    | 0 | 27.18 | 15 | 47  | 4  | 462  | 0.95  |
| 1120.54  | 9  | Q16659       | K.GHLSGELVTK GHLS[166.9984] 2    | -0.62  | 0.014    | 0.001    | 0 | 24.33 | 18 | 28  | 2  | 721  | 1.06  |
| 1656.736 | 11 | Q16666       | K.EVDATSPAPS EVDATS[166.99] 2    | 2.159  | 1.60E-05 | 0.002    | 0 | 53.39 | 18 | 68  | 3  | 785  | 0.9   |
| 2268.962 | 12 | Q16666       | K.VSEEQTOPPS VSEEQTOPPS[1] 2     | 0.118  | 0.002    | 0.002    | 0 | 32.73 | 19 | 68  | 3  | 785  | 1.12  |
| 831.493  | 6  | Q16695_P6843 | K.STELLUR.K STELLUR 2            | 2.128  | 2.20E-05 | 0.001    | 0 | 53.83 | 20 | 54  |    |      | 1.66  |
| 1656.739 | 7  | Q16875       | R.RNSVPLASPI RNS[166.9984] 2     | -0.956 | 0.026    | 0.001    | 1 | 21.94 | 19 | 22  | 1  | 520  | 0.63  |
| 1615.668 | 9  | Q17898       | R.TTSPFFSEDT TTS[166.9984] 2     | -1.06  | 0.033    | 0.003    | 0 | 18.99 | 17 | 19  | 3  | 1081 | 1.91  |
| 1644.676 | 7  | Q18PE1       | R.DHSPSQSGS DHS[166.9984] 3      | -0.153 | 0.042    | 0.002    | 0 | 18.79 | 18 | 19  | 1  | 504  | 1.22  |
| 2467.962 | 10 | Q1KMD3       | R.EEDEPEERSG EEDEPEERS[16] 2     | 0.106  | 0.002    | 0.004    | 1 | 31.61 | 18 | 43  | 5  | 747  | 1.4   |
| 2547.928 | 15 | Q1KMD3       | R.EEDEPEERSG EEDEPEERS[16] 3     | -0.062 | 0.037    | 0.003    | 1 | 17.7  | 16 | 43  | 5  | 747  | 1.27  |
| 1454.586 | 16 | Q1KMD3       | R.SGDETPGSEV S[166.9984]GD 2     | -0.056 | 0.004    | 9.00E-04 | 0 | 28.99 | 17 | 32  | 5  | 747  | 0.63  |
| 3292.365 | 25 | Q2781        | R.GARPPAAGP GARPPAAGPC 3         | 1.256  | 1.40E-04 | 0.002    | 0 | 43.47 | 17 | 71  | 2  | 1249 | 0.47  |
| 3292.365 | 26 | Q2781        | R.GARPPAAGP GARPPAAGPC 3         | 1.224  | 4.40E-06 | 0.002    | 0 | 57.92 | 17 | 72  | 2  | 1249 | 0.77  |
| 1635.737 | 15 | Q29RF7       | R.AAVQESQSP AAVQES[166.] 2       | 1.729  | 6.20E-05 | 0.002    | 0 | 47.84 | 18 | 80  | 4  | 1337 | 1.18  |
| 2241.914 | 10 | Q29RF7       | R.EQSSAAETG EQSSAAETGV. 2        | 2.197  | 2.50E-06 | 0.002    | 0 | 60.85 | 17 | 106 | 4  | 1337 | 0.77  |
| 1689.737 | 17 | Q2LD37       | K.VVFENEQDN: VVFENEQDNSS 2       | -0.992 | 0.033    | 0.004    | 0 | 20.61 | 18 | 21  | 4  | 5005 | 2.41  |
| 1689.737 | 9  | Q2LD37       | K.VVFENEQDN: VVFENEQDNSS 2       | -0.704 | 0.017    | 0.004    | 0 | 23.54 | 18 | 24  | 2  | 5005 | 2.41  |
| 1229.521 | 5  | Q2M2I8       | K.VGSLTPSSPK VGS[181.014] 2      | 0.404  | 0.001    | 0.001    | 0 | 34.59 | 18 | 35  | 2  | 961  | 1.1   |
| 1090.406 | 6  | Q2M3G4       | K.WCFSEPGK.L WC[160.0307]F 2     | 0.961  | 3.20E-04 | 0.001    | 0 | 35.16 | 13 | 35  | 1  | 852  | 1.24  |
| 1535.578 | 10 | Q2NXX8       | R.IVSDGEDED V[166.9984]D 2       | 2.159  | 5.60E-08 | -0.002   | 0 | 74.3  | 14 | 74  | 3  | 1250 | -1.24 |
| 1765.86  | 16 | Q2TAA2       | R.DVAEAKPELS DVAEAKPELSL 3       | 0.636  | 0.008    | 0.002    | 0 | 25.72 | 17 | 26  | 1  | 248  | 1.28  |
| 1031.419 | 7  | Q2T8E0       | K.STFAGSPEP.E STFAGS[166.99] 2   | -0.733 | 0.019    | 8.00E-04 | 0 | 21.21 | 16 | 21  | 3  | 894  | 0.82  |
| 1680.803 | 13 | Q2VPK5       | R.LSQMQSPPI: LSQMQS[166.9] 2     | -0.427 | 0.009    | 0.001    | 0 | 24.28 | 16 | 24  | 1  | 515  | 0.76  |
| 1380.604 | 8  | Q32MZ4       | K.IDGATQSSPA IDGATQSS[166.] 2    | -0.567 | 0.011    | 4.00E-04 | 0 | 25.88 | 19 | 175 | 11 | 808  | 0.26  |
| 3004.307 | 13 | Q32MZ4       | K.ALDNSLEND ALDNS[166.99] 3      | 1.224  | 3.20E-04 | 0.004    | 1 | 41.42 | 19 | 199 | 9  | 808  | 1.29  |
| 3004.307 | 13 | Q32MZ4       | K.ALDNSLEND ALD[166.9984] 3      | 1.042  | 0.003    | 0.002    | 1 | 31.74 | 19 | 175 | 11 | 808  | 0.66  |
| 2828.102 | 22 | Q32MZ4       | R.CTLPEHESPC C[160.0307]Tf 3     | 1.291  | 2.20E-06 | 0.002    | 0 | 61.24 | 17 | 175 | 11 | 808  | 0.87  |
| 3497.472 | 15 | Q32MZ4       | K.TEVPGPSAGT TEVPGS[166.99] 3    | 1.291  | 1.90E-04 | 0.003    | 0 | 42.86 | 18 | 175 | 11 | 808  | 0.94  |
| 1853.791 | 10 | Q32MZ4       | K.ALDNSLEND ALDNS[166.99] 2      | 2.159  | 1.40E-06 | 0.002    | 0 | 65.45 | 19 | 175 | 11 | 808  | 0.83  |
| 2828.102 | 10 | Q32MZ4       | R.CTLPEHESPC C[160.0307]Tf 3     | 1.224  | 2.10E-05 | 0.002    | 0 | 51.4  | 17 | 199 | 9  | 808  | 0.87  |
| 1369.57  | 6  | Q32MZ4       | R.EIDCLPEAQ EIDC[160.0307] 2     | -0.949 | 0.027    | 0.001    | 0 | 21.06 | 18 | 175 | 11 | 808  | 0.88  |
| 4224.774 | 8  | Q32MZ4       | K.TEVPGPSAGT TEVPGPSAGT[1] 4     | -0.244 | 0.032    | 0.004    | 1 | 20.24 | 18 | 253 | 14 | 808  | 0.91  |
| 1839.747 | 10 | Q32MZ4       | K.IAAESSENVDI IAAES[166.998] 2   | -0.456 | 0.009    | 8.00E-04 | 0 | 23.99 | 16 | 241 | 10 | 808  | 0.43  |
| 1472.59  | 6  | Q32MZ4       | K.SDQGEALD: S[166.9984]DQ 2      | -0.458 | 0.008    | 0.003    | 0 | 23.97 | 16 | 241 | 10 | 808  | 1.8   |
| 1839.747 | 5  | Q32MZ4       | K.IAAESSENVDI IAAES[166.99] 2    | -0.688 | 0.015    | 8.00E-04 | 0 | 21.66 | 16 | 275 | 14 | 808  | 0.43  |
| 4224.774 | 12 | Q32MZ4       | K.TEVPGPSAGT TEVPGS[166.99] 4    | 0.576  | 0.008    | 0.004    | 1 | 26.24 | 18 | 205 | 10 | 808  | 0.91  |
| 3497.472 | 15 | Q32MZ4       | K.TEVPGPSAGT TEVPGPSAGT[1] 3     | 1.334  | 0.016    | 0.003    | 0 | 23.69 | 18 | 275 | 14 | 808  | 0.94  |
| 2798.133 | 18 | Q3B726       | K.HQEVQDQDP HQEVQDQDPV 3         | 0.291  | 1.50E-05 | 0.002    | 0 | 52.24 | 17 | 85  | 4  | 338  | 0.75  |
| 1592.736 | 9  | Q3B726       | R.KHSEAEFTPI KHS[166.9984] 2     | 0.728  | 5.10E-04 | 0.002    | 1 | 39.23 | 19 | 85  | 4  | 338  | 0.96  |
| 2798.133 | 14 | Q3B726       | K.HQEVQDQDP HQEVQDQDPV 3         | 1.224  | 1.00E-05 | 0.002    | 0 | 53.86 | 17 | 86  | 4  | 338  | 0.75  |
| 2926.228 | 9  | Q3B726       | K.HQEVQDQDP HQEVQDQDPV 3         | 0.328  | 0.015    | 1.00E-04 | 1 | 24.63 | 19 | 80  | 4  | 338  | 0.05  |
| 2926.228 | 14 | Q3B726       | K.HQEVQDQDP HQEVQDQDPV 3         | 0.775  | 0.005    | 1.00E-04 | 1 | 29.1  | 19 | 99  | 4  | 338  | 0.05  |
| 1989.828 | 19 | Q3KQU3       | R.RSSQSPPTAV RSSQPS[166.99] 3    | 0.049  | 0.027    | 0.002    | 1 | 21.83 | 19 | 114 | 8  | 841  | 1.15  |
| 2069.894 | 11 | Q3KQU3       | R.RSSQSPPTAV RSS[166.9984]C 2    | 2.119  | 9.40E-06 | 0.002    | 1 | 56.02 | 18 | 114 | 8  | 841  | 0.8   |
| 1270.593 | 9  | Q3KQU3       | R.LSASTASELSP LSASTASELS[16] 2   | 2.159  | 3.80E-06 | 0.001    | 0 | 59.85 | 18 | 152 | 11 | 841  | 1.02  |
| 2069.894 | 13 | Q3KQU3       | R.RSSQSPPTAV RSSQPS[166.99] 3    | 0.093  | 0.024    | 0.002    | 1 | 22.25 | 19 | 152 | 11 | 841  | 1.04  |
| 1066.54  | 5  | Q3KQU3       | R.SRSVAVLP.N SRSVAV[181.01] 2    | -1.014 | 0.031    | 0.001    | 1 | 22.41 | 20 | 152 | 11 | 841  | 1.16  |
| 2313.02  | 7  | Q3KQU3       | K.ESAAPASAP ESAAPAS[166.9] 2     | 1.448  | 1.20E-04 | 0.002    | 0 | 45.03 | 18 | 152 | 11 | 841  | 1.06  |
| 1989.928 | 8  | Q3KQU3       | R.RSSQSPPTAV RSS[166.9984]C 2    | 0.963  | 3.30E-04 | 0.001    | 1 | 40.18 | 18 | 152 | 11 | 841  | 0.59  |
| 1154.527 | 7  | Q3KQU3       | R.CSVSVAVLPK C[160.0307]SV 2     | -0.684 | 0.015    | 0.002    | 0 | 22.71 | 17 | 126 | 11 | 841  | 1.37  |
| 2313.02  | 9  | Q3KQU3       | K.ESAAPASAP ESAAPAS[166.9] 2     | 1.314  | 1.60E-04 | 0.002    | 0 | 43.68 | 18 | 174 | 9  | 841  | 1.06  |
| 1285.557 | 6  | Q3KQU3       | K.SSATLWNPS S[166.9984]A 2       | -1.046 | 0.035    | 6.00E-04 | 0 | 20.09 | 18 | 98  | 9  | 841  | 0.44  |
| 1672.729 | 6  | Q3L8U1       | R.VMSPENFPPT VMS[166.9984] 2     | 0.554  | 8.30E-04 | 0.002    | 0 | 37.09 | 19 | 37  | 2  | 2897 | 1.49  |
| 1833.779 | 8  | Q3L8U1       | K.YAEDIEGKQS: YAEDIEGKQS[1] 2    | 0.267  | 0.002    | 0.002    | 1 | 33.2  | 18 | 51  | 3  | 2897 | 0.9   |
| 1533     |    |              |                                  |        |          |          |   |       |    |     |    |      |       |

|          |    |               |                                 |        |          |           |   |       |    |     |    |      |       |
|----------|----|---------------|---------------------------------|--------|----------|-----------|---|-------|----|-----|----|------|-------|
| 2246.975 | 19 | Q52LW3        | K.IEEDRCNSAI IEEDRC[160.03] 3   | -0.045 | 0.036    | 0.003     | 1 | 20.91 | 19 | 72  | 7  | 1261 | 1.23  |
| 1824.805 | 7  | Q52LW3        | R.EPPSPSETGPI EPPS[166.9984] 2  | -0.874 | 0.022    | 0.003     | 0 | 22.8  | 19 | 87  | 6  | 1261 | 1.51  |
| 1189.598 | 5  | Q52LW3        | R.LLLASPPNER.LLLAS[166.9984] 2  | -1.075 | 0.035    | 7.00E-04  | 0 | 20.83 | 19 | 54  | 5  | 1261 | 0.57  |
| 895.396  | 6  | Q52LW3        | K.SLFFSSK.E SLFFS[166.9984] 2   | -0.556 | 0.012    | 6.00E-04  | 0 | 20    | 13 | 32  | 3  | 1261 | 0.67  |
| 1066.518 | 12 | Q53E16        | R.SGLTVPTSPK.SGLTVPTS[166. 2    | 0.003  | 0.003    | 8.00E-04  | 0 | 31.58 | 19 | 32  | 1  | 469  | 0.73  |
| 1066.518 | 5  | Q53E16        | R.SGLTVPTSPK.SGLTVPTS[181.0] 2  | -0.587 | 0.012    | 8.00E-04  | 0 | 25.66 | 19 | 26  | 2  | 469  | 0.73  |
| 1185.555 | 5  | Q53E90        | R.LNSPPSSIVK.SLNS[166.9984] 2   | -0.229 | 0.006    | 0.001     | 0 | 26.26 | 16 | 26  | 2  | 1204 | 1.02  |
| 1695.766 | 11 | Q53E24        | K.SPAAALNESL.S[166.9984]PT7 2   | 1.471  | 1.20E-04 | 0.002     | 0 | 45.26 | 18 | 45  | 1  | 464  | 1.12  |
| 1695.766 | 7  | Q53E24        | K.SPAAALNESL.SPT[181.014]A 2    | 1.387  | 1.40E-04 | 0.002     | 0 | 44.4  | 18 | 44  | 1  | 464  | 1.12  |
| 2171.001 | 16 | Q53F19        | K.AEAPAGPALC.AEAPAGPALG 3       | -0.149 | 0.047    | 0.003     | 0 | 19.83 | 19 | 55  | 4  | 620  | 1.48  |
| 1051.464 | 6  | Q53GL7        | K.AGPVSPGCVN.AGPVSP[166.99] 2   | -0.768 | 0.018    | 6.00E-04  | 0 | 20.85 | 16 | 21  | 2  | 1025 | 0.56  |
| 1969.854 | 8  | Q53G57        | K.SPDAASAFSP.S[166.9984]PD 2    | 1.545  | 9.50E-05 | 0.002     | 0 | 46    | 18 | 46  | 2  | 698  | 0.92  |
| 1668.675 | 11 | Q53G59        | R.EVDEDESEPER.EVDEDS[166.99] 2  | -1.048 | 0.032    | 0.002     | 1 | 19.05 | 17 | 19  | 1  | 565  | 1     |
| 1615.736 | 13 | Q53HL2        | R.IYNISGNGSPL.IYNISGNGS[16] 2   | 1.557  | 9.70E-05 | 0.002     | 0 | 46.12 | 18 | 46  | 2  | 280  | 1.11  |
| 1254.58  | 4  | Q53LP3        | R.DLVMGSSPQI.DLVMGSS[166. 2     | -0.716 | 0.015    | 0.001     | 0 | 24.37 | 19 | 24  | 1  | 525  | 0.91  |
| 1820.752 | 10 | Q53SF7        | R.QSSLTFQSSDI.QSS[166.9984] 2   | 2.159  | 9.00E-06 | 0.001     | 0 | 55.98 | 18 | 56  | 2  | 1204 | 0.79  |
| 1492.704 | 8  | Q53SF7        | R.DQTASAPATF.DQTAS[166.99] 2    | -0.663 | 0.013    | 0.004     | 0 | 23.92 | 18 | 67  | 2  | 1204 | 2.68  |
| 1066.482 | 7  | Q53SF7        | K.VEAENISPK.VEAENIS[166.9] 2    | 0.252  | 0.002    | 7.00E-04  | 0 | 33.05 | 18 | 96  | 5  | 1204 | 0.66  |
| 2020.947 | 7  | Q53T59        | R.KLSPQDPSD.KLS[166.9984]F 2    | -0.132 | 0.004    | 0.002     | 1 | 30.23 | 19 | 47  | 2  | 392  | 1.12  |
| 2020.947 | 15 | Q53T59        | R.KLSPQDPSD.KLSPQDPS[166. 3     | 0.473  | 0.011    | 0.002     | 1 | 26.07 | 19 | 26  | 1  | 392  | 1.02  |
| 1921.836 | 17 | Q562F6        | R.KTSDIPSPESH.KTS[166.9984] 3   | 0.625  | 0.007    | 0.002     | 1 | 27.6  | 19 | 28  | 1  | 1265 | 1.09  |
| 1954.064 | 14 | Q562R1        | R.VAPDEHPILL.VAPDEHPILLTE 3     | -0.123 | 0.044    | 0.003     | 0 | 14.13 | 13 | 39  | 3  | 376  | 1.7   |
| 2021.889 | 10 | Q56N19        | R.VLSEPIGPES.VLSEPIGPES[16] 2   | -0.27  | 0.006    | 0.003     | 0 | 27.85 | 18 | 28  | 2  | 601  | 1.26  |
| 2021.889 | 8  | Q56N19        | R.VLSEPIGPES.VLSEPIGPESPS 2     | -0.574 | 0.013    | 0.003     | 0 | 24.84 | 18 | 25  | 1  | 601  | 1.26  |
| 2021.889 | 11 | Q56N19        | R.VLSEPIGPES.VLSEPIGPESPS 2     | 2.025  | 1.70E-05 | 0.003     | 0 | 53.6  | 18 | 54  | 2  | 601  | 1.26  |
| 2021.889 | 14 | Q56N19        | R.VLSEPIGPES.VLSEPIGPESPS 2     | -0.014 | 0.004    | 0.003     | 0 | 30.39 | 18 | 30  | 1  | 601  | 1.26  |
| 1540.646 | 6  | Q58WW2        | R.DGQSPNVSL.DGQSS[166.99] 2     | 0.988  | 3.10E-04 | 0.002     | 0 | 41.43 | 19 | 41  | 1  | 860  | 1.41  |
| 3025.186 | 18 | Q58KZ1        | K.GENPFQIDH.GENPFQIDHS[ 3       | 0.649  | 0.007    | 0.002     | 0 | 26.81 | 18 | 27  | 2  | 582  | 0.68  |
| 2945.219 | 18 | Q58KZ1        | K.GENPFQIDH.GENPFQIDHS 3        | 0.641  | 0.007    | 0.003     | 0 | 27.77 | 19 | 28  | 2  | 582  | 1.12  |
| 866.45   | 6  | Q5C2C0        | K.LANSUR.E LANS[166.9984] 2     | -0.021 | 0.003    | 8.00E-04  | 0 | 32.34 | 20 | 32  | 5  | 6907 | 0.92  |
| 1625.669 | 16 | Q5F1R6        | K.VDPEDTNLNC.VDPEDTNLNQD 2      | 0.671  | 6.90E-04 | 6.00E-04  | 0 | 36.26 | 17 | 36  | 1  | 531  | 0.35  |
| 2074.758 | 10 | Q5F1R6        | K.EFGDGSDEEN.EFGDGS[166.9] 2    | 0.288  | 0.002    | 0.001     | 0 | 30.42 | 15 | 61  | 2  | 531  | 0.68  |
| 953.434  | 6  | Q5FWF5        | K.LDSQVSK.L LDSQS[166.99] 2     | -0.556 | 0.012    | 0.001     | 0 | 23.99 | 17 | 24  | 2  | 840  | 1.22  |
| 2219.865 | 11 | Q5SHR7        | R.IQDFDGGSE.IQDFDGGSS[16] 2     | 2.159  | 6.40E-07 | 0.002     | 0 | 65.93 | 16 | 66  | 2  | 873  | 0.84  |
| 1911.848 | 5  | Q5HYI7        | K.LTPEEENNS.LTPEEENNSFC 2       | -0.202 | 0.005    | 0.003     | 1 | 29.53 | 19 | 30  | 1  | 312  | 1.79  |
| 1709.778 | 8  | Q5HYJ3        | K.ISNLSPEEQG.ISNLS[166.9984] 2  | 1.769  | 5.60E-05 | 0.001     | 0 | 48.24 | 18 | 48  | 1  | 339  | 0.61  |
| 2064.923 | 20 | Q5JPE7_P69849 | R.LQGVGALGQ.LQGVGALGQA 2        | -0.377 | 0.007    | 0.002     | 0 | 27.78 | 19 | 28  | 2  | 913  | 0.72  |
| 1993.685 | 10 | Q5JSH3        | K.SDSTDGVCSG.S[166.9984]DTI 2   | 2.11   | 2.40E-05 | 0.001     | 0 | 47.65 | 14 | 93  | 2  | 913  | 0.88  |
| 1779.659 | 8  | Q5JSH3        | K.EYVSNDAAG.EYVSNDAAGQS[ 2      | 2.159  | 1.60E-06 | 0.002     | 0 | 59.04 | 13 | 93  | 2  | 913  | 0.72  |
| 1993.685 | 8  | Q5JSH3        | K.SDSTDGVCSG.SDSTD[181.014]D 2  | 2.127  | 9.40E-07 | 0.001     | 0 | 61.72 | 14 | 140 | 3  | 913  | 0.72  |
| 1143.472 | 5  | Q5JSZ5        | R.EAGSPAQEFK.EAGS[166.9984] 2   | -0.931 | 0.025    | 3.00E-04  | 0 | 21.24 | 18 | 27  | 6  | 2229 | 0.29  |
| 1612.66  | 8  | Q5JSZ5        | R.CSPLEDFVPC.[160.0307]S1 2     | -0.332 | 0.006    | 0.002     | 0 | 27.23 | 18 | 72  | 6  | 2229 | 1.51  |
| 2252.956 | 13 | Q5JSZ5        | R.EGPGSEPDSC.EGPGS[166.99] 2    | 0.728  | 6.00E-04 | 0.001     | 0 | 37.83 | 18 | 44  | 5  | 2229 | 0.55  |
| 2051.788 | 14 | Q5JSZ5        | R.VASETHSEGS.VAS[166.9984] 2    | -0.44  | 0.009    | 0.002     | 0 | 25.13 | 17 | 72  | 6  | 2229 | 0.73  |
| 1971.822 | 15 | Q5JSZ5        | R.VASETHSEGS.VASETHS[166.5] 3   | 0.224  | 0.018    | 0.002     | 0 | 22.58 | 18 | 31  | 5  | 2229 | 0.97  |
| 1209.519 | 4  | Q5JSZ5        | K.EVPWPSAEK.EVPWSPS[166. 2      | -0.901 | 0.025    | 0.001     | 0 | 20.52 | 17 | 68  | 4  | 2229 | 1.06  |
| 1622.735 | 6  | Q5JTD0        | R.GSPEEELPLPA.GS[166.9984]PI 2  | 1.475  | 9.70E-05 | 0.002     | 0 | 45.3  | 18 | 80  | 3  | 557  | 1.48  |
| 1738.801 | 15 | Q5JTD0        | R.KDSLTAQAEK.KDS[166.9984] 2    | 2.12   | 2.40E-05 | 0.002     | 1 | 52.75 | 19 | 80  | 3  | 557  | 1.15  |
| 2631.994 | 24 | Q5JTH9        | K.GDSIEEILADS.GDSIEEILADS[1] 3  | 0.205  | 0.019    | 0.003     | 0 | 19.41 | 15 | 19  | 1  | 1297 | 1.11  |
| 2836.132 | 13 | Q5JTV8        | K.VNFSEEGETE.VNFSEEGET[18] 3    | 0.21   | 0.019    | 0.002     | 0 | 20.42 | 16 | 91  | 6  | 583  | 0.83  |
| 2460.989 | 26 | Q5JTV8        | R.DSHSSEDEA.DSHS[166.998] 3     | 1.224  | 4.70E-04 | 0.004     | 0 | 37.79 | 17 | 97  | 4  | 583  | 1.43  |
| 2916.098 | 13 | Q5JTV8        | K.VNFSEEGETE.VNFS[166.9984] 3   | 1.291  | 5.10E-04 | 0.002     | 0 | 35    | 15 | 91  | 6  | 583  | 0.56  |
| 2460.989 | 16 | Q5JTV8        | R.DSHSSEDEA.DSHS[166.9984] 3    | 1.092  | 0.003    | 0.004     | 0 | 30.26 | 17 | 86  | 6  | 583  | 1.43  |
| 2281.08  | 13 | Q5JTV8        | R.LQQHSEEQPI.LQQHSEEQPPU 3      | -0.179 | 0.047    | 0.002     | 0 | 17.56 | 17 | 72  | 4  | 583  | 0.89  |
| 2836.132 | 10 | Q5JTV8        | K.VNFSEEGETE.VNFS[166.9984] 3   | 0.72   | 0.006    | 0.002     | 0 | 25.55 | 16 | 111 | 4  | 583  | 0.83  |
| 2460.989 | 6  | Q5JTV8        | R.DSHSSEDEA.DSHSSEDEASS 3       | 0.86   | 0.005    | 0.004     | 0 | 27.96 | 17 | 79  | 5  | 583  | 1.43  |
| 2903.199 | 12 | Q5MIZ7        | K.GSLVGLVDPY.GSLVGLVDYDPI 3     | -0.072 | 0.04     | -3.00E-04 | 1 | 19.64 | 18 | 20  | 1  | 849  | -0.09 |
| 1111.514 | 6  | Q5R3F8        | R.QLSADAATVF.QLS[166.9984] 2    | -0.064 | 0.003    | 8.00E-04  | 0 | 31.91 | 20 | 32  | 4  | 820  | 0.71  |
| 1243.546 | 4  | Q5R3F8        | R.MASIPSMIGE.MAS[166.9984] 2    | -1.138 | 0.047    | 0.002     | 0 | 19.15 | 18 | 37  | 5  | 820  | 1.62  |
| 1931.855 | 12 | Q5SW79        | R.SESLDPDSSM.SES[166.9984] 2    | 0.993  | 2.90E-04 | 0.002     | 0 | 41.47 | 19 | 41  | 5  | 1584 | 1.29  |
| 1500.61  | 8  | Q5SW79        | R.LGEASDESLA.LGEAS[166.998] 2   | 2.016  | 3.40E-05 | 0.004     | 0 | 49.69 | 17 | 50  | 3  | 1584 | 2.4   |
| 1876.723 | 9  | Q5TON5        | R.ESPEGSYDDE.S[166.9984]PT 2    | 1.777  | 4.70E-05 | 0.001     | 0 | 47.32 | 17 | 47  | 3  | 605  | 0.72  |
| 1159.524 | 6  | Q5TON5        | R.TISDGTISAKI.TIS[166.9984]D 2  | -0.903 | 0.027    | 0.001     | 0 | 21.52 | 18 | 51  | 2  | 605  | 1.11  |
| 1535.615 | 8  | Q5T1M5        | R.SSLSGDEEDEI.SSL[166.9984] 2   | -0.481 | 0.009    | 0.003     | 0 | 24.74 | 17 | 38  | 4  | 1219 | 1.78  |
| 1535.615 | 7  | Q5T1M5        | R.SSLSGDEEDEI.SS[166.9984]LS 2  | -0.04  | 0.004    | 0.002     | 0 | 28.15 | 16 | 40  | 4  | 1219 | 1.46  |
| 1321.758 | 11 | Q5T200        | R.SLSPSHLTDOR.SL[166.9984]P 2   | 0.872  | 4.30E-04 | 0.002     | 0 | 39.27 | 18 | 49  | 8  | 1668 | 1.39  |
| 2098.997 | 15 | Q5T200        | K.GPRTPSPPPP.GPRT[181.014] 3    | 0.575  | 0.01     | 0.003     | 1 | 26.07 | 18 | 49  | 8  | 1668 | 1.59  |
| 1916.864 | 6  | Q5T200        | R.GNIETTSEDG.GNIETTSEDGQ 2      | 0.003  | 0.003    | 0.002     | 1 | 31.56 | 19 | 74  | 6  | 1668 | 0.82  |
| 1788.769 | 8  | Q5T200        | R.GNIETTSEDG.GNIETTSEDGQ 2      | 2.197  | 1.30E-05 | -8.00E-04 | 0 | 54.21 | 18 | 88  | 8  | 1668 | -0.43 |
| 1649.653 | 15 | Q5T310        | K.DLESCSDDDN.DLESC[160.030] 2   | 2.159  | 1.90E-05 | 0.003     | 0 | 49.19 | 15 | 51  | 2  | 446  | 1.66  |
| 1902.724 | 9  | Q5T310        | K.EEEEAATASERI.EEEEAATAS[166. 3 | -0.125 | 0.046    | 0.003     | 1 | 18.07 | 17 | 51  | 2  | 446  | 1.47  |
| 2920.234 | 15 | Q5T457        | R.TSPADHGGSS.TS[166.9984]PV 3   | 0.169  | 0.021    | -0.002    | 0 | 22.01 | 18 | 31  | 11 | 5183 | -0.87 |
| 1277.614 | 6  | Q5T457        | K.ELASPVPELR.ELAS[166.9984] 2   | -0.711 | 0.015    | 0.002     | 0 | 23.44 | 18 | 31  | 9  | 5183 | 1.66  |
| 2920.234 | 19 | Q5T457        | R.TSPADHGGSS.T[181.014]SPA 3    | 0.416  | 0.012    | -0.002    | 0 | 24.52 | 18 | 31  | 7  | 5183 | -0.87 |
| 1073.514 | 5  | Q5T457        | R.HVTLPPSSP.HVTLPPSS[166.9] 2   | -1.016 | 0.034    | 0.001     | 0 | 21.38 | 19 | 52  | 10 | 5183 | 1     |
| 2920.234 | 9  | Q5T457        | R.TSPADHGGSS.TSPADHGGSVG 3      | 0.861  | 0.004    | -0.002    | 0 | 28.96 | 18 | 37  | 7  | 5183 | -0.87 |
| 1794.838 | 9  | Q5T5P2        | R.RQEQPSIEST.RQEQPSIEST[1] 3    | -0.107 | 0.045    | 0.002     | 1 | 19.25 | 18 | 19  | 5  | 1943 | 0.98  |
| 1794.838 | 10 | Q5T5P2        | R.RQEQPSIEST.RQEQPSIESTS[1] 3   | 0.676  | 0.007    | 0.002     | 1 | 27.1  | 18 | 27  | 5  | 1943 | 0.98  |
| 1718.753 | 9  | Q5T5Y3        | K.SPNSHDESEPM.S[166.9984]PN 3   | 0.228  | 0.02     | 0.002     | 0 | 20.63 | 18 | 23  | 3  | 1602 | 1.36  |
| 1337.573 | 6  | Q5T5Y3        | K.SIQGEDIPDQI.S[166.9984]QC 2   | -1.042 | 0.032    | 0.003     | 0 | 22.11 | 18 | 26  | 5  | 1602 | 1.13  |
| 1315.652 | 8  | Q5T5Y3        | R.RPSEGPQIV.RPS[166.9984] 2     | -0.671 | 0.014    | 0.001     | 0 | 23.82 | 18 | 26  | 5  | 1602 | 0.83  |
| 2059.96  | 18 | Q5T5Y3        | R.ADVVPQQAD.ADVVPQQADPT 2       | -1.085 | 0.039    | 7.00E-04  | 1 | 19.68 | 18 | 25  | 5  | 1602 | 0.35  |
| 1484.663 | 6  | Q5TRP6        | R.EGSTQQLQTT.EGSTQQLQTT[S] 2    | -0.759 | 0.019    | 0.002     | 0 | 22.95 | 18 | 23  | 1  | 1007 | 1.05  |
| 1182.515 | 5  | Q5TRC2        | R.SSLSDLTHRI.SSLS[166.9984] 2   | -1.099 | 0.042    | 0.001     | 0 | 18.56 | 17 | 19  | 3  | 384  | 1.06  |
| 2752.038 | 8  | Q5TAQ9        | R.VHORSSEEEE.VHORS[166.99] 3    | 1.207  | 0.002    | 0.002     | 1 | 31.41 | 17 | 31  | 1  | 597  | 0.85  |
| 2143.893 | 7  | Q5TCQ9        | K.QPEDDSSQAF.QPEDDSSQAFIS 2     | -0.149 | 0.004    | 0.002     | 0 | 29.06 | 18 | 41  | 3  | 1506 | 0.89  |
| 1732.614 | 14 | Q5TCQ9        | R.MDSSLPEEEE.MDSS[166.99] 2     | 0      |          |           |   |       |    |     |    |      |       |

|          |    |              |                                |        |          |           |   |       |    |     |    |       |       |
|----------|----|--------------|--------------------------------|--------|----------|-----------|---|-------|----|-----|----|-------|-------|
| 2504.986 | 17 | QSV5L9       | R.KDSEGYSEPI KDSEGY[166.9      | 0.949  | 0.004    | 0.004     | 1 | 28.82 | 17 | 29  | 1  | 837   | 1.38  |
| 1526.692 | 8  | QSVT52       | R.MSGEPIQTV MS[166.9984]C      | 0.715  | 6.40E-04 | 0.002     | 0 | 36.7  | 17 | 112 | 8  | 1461  | 1.56  |
| 2109.945 | 8  | QSVT52       | R.GPTSTSIDNID GPTSTSIDNIDG     | 0.494  | 0.01     | 0.001     | 1 | 25.28 | 18 | 113 | 8  | 1461  | 0.55  |
| 1862.688 | 18 | QSVT52       | R.DVEDMELSD DVEDMELSD[166      | 2.159  | 1.30E-07 | 0.001     | 0 | 71.14 | 15 | 112 | 8  | 1461  | 0.69  |
| 1682.793 | 7  | QSVT52       | R.RMSGEPQTV RMS[166.9984]3     | 0.221  | 0.02     | 0.002     | 1 | 23.53 | 19 | 112 | 8  | 1461  | 1.24  |
| 2853.224 | 18 | QSVT52       | R.SGTPQDEM SGT[181.014]P       | -0.069 | 0.04     | 0.007     | 0 | 19.67 | 18 | 80  | 7  | 1461  | 2.54  |
| 1714.753 | 15 | QSVTR2       | R.SGSALLOSQS:SGSALLOSQS[2      | 0.147  | 0.002    | 0.001     | 0 | 32.02 | 18 | 78  | 3  | 975   | 0.59  |
| 1961.849 | 13 | QSVTR2       | K.ALVVPEPEPD:ALVVPEPEPDC       | 1.618  | 7.60E-05 | 0.002     | 0 | 46.73 | 18 | 63  | 3  | 975   | 0.88  |
| 1714.753 | 7  | QSVTR2       | R.SGSALLOSQS:SGSALLOSQSST      | 0.747  | 5.40E-04 | 0.001     | 2 | 38.02 | 18 | 75  | 3  | 975   | 0.59  |
| 1714.753 | 8  | QSVTR2       | R.SGSALLOSQS:SGSALLOSQS[1]     | 0.128  | 0.002    | 0.001     | 0 | 31.81 | 18 | 54  | 4  | 975   | 0.59  |
| 2089.944 | 6  | QSVTR2       | K.ALVVPEPEPD:ALVVPEPEPDC       | -0.581 | 0.011    | 0.002     | 1 | 25.73 | 19 | 85  | 5  | 975   | 0.99  |
| 882.412  | 4  | QSVU4        | K.NSPFFLK S NS[166.9984]P      | -0.873 | 0.024    | 6.00E-04  | 0 | 18.82 | 15 | 44  | 8  | 2279  | 0.71  |
| 1272.518 | 4  | QSVU4        | R.SPGLCSDSLEY S[166.9984]P     | -0.139 | 0.004    | 0.001     | 0 | 27.16 | 16 | 47  | 11 | 2279  | 1.07  |
| 961.512  | 5  | QSVU4        | R.IPSPNILKT IPS[166.9984]P     | 0.534  | 8.20E-04 | 0.001     | 0 | 37.89 | 20 | 47  | 11 | 2279  | 1.07  |
| 1288.498 | 10 | QSVU4        | R.SFPDIEEEK J S[166.9984]P     | -1.19  | 0.044    | 0.002     | 0 | 18.68 | 18 | 34  | 9  | 2279  | 1.75  |
| 1466.623 | 8  | QSVU4        | K.LCSPLEPGDF LC[160.0307]S     | -0.508 | 0.011    | 0.003     | 0 | 24.45 | 17 | 55  | 9  | 2279  | 1.79  |
| 2032.901 | 16 | QSVV41       | K.GSFKDDPQLY GS[166.9984]F     | -0.137 | 0.045    | 0.003     | 1 | 19.99 | 19 | 27  | 2  | 709   | 1.35  |
| 2632.078 | 12 | QSVV41       | R.GLNTSQESDC GLNTS[166.998     | 0.563  | 0.009    | 0.004     | 0 | 24.99 | 17 | 27  | 2  | 709   | 1.47  |
| 1417.647 | 8  | QSVVQ8       | K.QGSPSPVSPNA QGSPSPV[166.5    | -0.56  | 0.012    | 8.00E-04  | 0 | 23.95 | 17 | 24  | 1  | 1189  | 0.55  |
| 2258.009 | 15 | QSVZ89       | R.RSSPLDHDHGR RSS[166.9984]3   | 1.224  | 9.10E-04 | 0.003     | 1 | 35.84 | 18 | 55  | 3  | 1673  | 1.31  |
| 1013.503 | 7  | QSVZ89       | R.STSLALVR S STS[166.9984]L    | 0.589  | 7.20E-04 | 7.00E-04  | 0 | 37.44 | 19 | 55  | 3  | 1673  | 0.71  |
| 2612.122 | 13 | QSVZ89       | K.HSQSPSEPHS HSQSPS[166.998    | -0.161 | 0.047    | 0.003     | 0 | 18.73 | 18 | 52  | 3  | 1673  | 1.3   |
| 2612.122 | 10 | QSVZ89       | K.HSQSPSEPHS HSQSPS[166.998    | 0.043  | 0.029    | 0.003     | 0 | 20.78 | 18 | 44  | 2  | 1673  | 1.3   |
| 1702.768 | 16 | QSVZK9       | R.RSSGFISELPSR RSS[166.9984]C  | -1.131 | 0.044    | 0.002     | 1 | 20.24 | 19 | 21  | 4  | 1371  | 1.15  |
| 1978.919 | 17 | QSVZK9       | K.SERPPTILMTE SERPPTILMTEE     | -0.015 | 0.037    | 0.003     | 0 | 20.17 | 18 | 20  | 3  | 1371  | 1.52  |
| 1749.769 | 12 | QSVZK9       | R.TASRPDDIPD: TASRPDDIPD       | -0.18  | 0.048    | 0.002     | 0 | 19.56 | 19 | 32  | 4  | 1371  | 1.32  |
| 1978.919 | 17 | QSVZK9       | K.SERPPTILMTE SERPPTILMTEE     | 0.405  | 0.014    | 0.003     | 0 | 24.41 | 18 | 38  | 5  | 1371  | 1.52  |
| 1749.769 | 12 | QSVZK9       | R.TASRPDDIPD: TASRPDDIPD       | 0.195  | 0.002    | 0.001     | 0 | 32.49 | 18 | 54  | 5  | 1371  | 0.69  |
| 2262.015 | 19 | QSVZL5       | R.RVTOHESDNI RVTOHES[166.9     | -0.089 | 0.041    | -2.00E-04 | 1 | 20.43 | 19 | 84  | 4  | 1548  | -0.09 |
| 2105.914 | 19 | QSVZL5       | R.VTOHESDNI VTOHES[166.9       | 2.159  | 1.00E-05 | 0.001     | 0 | 55.42 | 18 | 84  | 4  | 1548  | 0.57  |
| 2105.914 | 8  | QSVZL5       | R.VTOHESDNI V[181.014]QH       | 0.698  | 0.006    | 0.002     | 0 | 27.33 | 18 | 87  | 4  | 1548  | 1.05  |
| 950.471  | 6  | QSVZL5       | K.SIVAVEPR S S[166.9984]VA     | -1.118 | 0.038    | 3.00E-04  | 0 | 20.35 | 19 | 83  | 6  | 1548  | 0.36  |
| 1271.588 | 4  | QSW0B1       | K.IQSSLSASPS IQSSLS[166.99     | -1.247 | 0.049    | 0.002     | 0 | 19.11 | 19 | 19  | 2  | 726   | 1.45  |
| 1271.588 | 5  | QSW0B1       | K.IQSSLSASPS IQSSLSAS[166.     | -0.384 | 0.007    | 0.002     | 0 | 27.7  | 19 | 28  | 2  | 726   | 1.45  |
| 2201.803 | 21 | QSXUJ1       | R.TWDDSDOPE TWDDSD[166.9       | 2.159  | 1.60E-07 | 0.001     | 0 | 69.78 | 14 | 70  | 1  | 488   | 0.62  |
| 2305.803 | 9  | QSZPR3       | K.QSCEENAGS QSC[160.0307]      | -1.212 | 0.046    | 0.006     | 0 | 13.41 | 13 | 13  | 1  | 534   | 2.42  |
| 2169.871 | 8  | Q63HN8       | K.EDQEAALLS EDQEAALLS[1        | 1.142  | 2.00E-04 | 0.002     | 0 | 39.97 | 16 | 40  | 2  | 5207  | 0.76  |
| 1767.759 | 10 | Q63HN8       | R.DFATPSLHTS DFATPSLHTSDC      | -0.255 | 0.006    | 0.002     | 0 | 29.19 | 18 | 56  | 7  | 5207  | 1     |
| 1517.7   | 7  | Q63ZV6,Q96P1 | R.QLEEPGAGTF QLEEPGAGT[PS]     | -0.143 | 0.004    | 0.002     | 0 | 27.92 | 18 | 29  | 0  | 1.22  |       |
| 1829.762 | 7  | Q641Q2,Q5SN1 | R.LAAQESSETE LAAQESSET[18      | -1.093 | 0.037    | 0.002     | 0 | 19.62 | 18 | 75  | 0  | 1.06  |       |
| 1829.762 | 7  | Q641Q2,Q5SN1 | R.LAAQESSETE LAAQES[166.9      | 0.624  | 7.10E-04 | 0.002     | 0 | 36.78 | 18 | 112 | 0  | 1.06  |       |
| 1726.753 | 10 | Q641Q2,Q5SN1 | R.AVASPEATVS AVAS[166.998      | 2.159  | 3.00E-07 | 0.001     | 0 | 70.28 | 18 | 105 | 0  | 0.7   |       |
| 1999.878 | 18 | Q641Q2,Q5SN1 | K.ETVSEAPPLF ETVSEAPPLF[5      | -1.171 | 0.046    | 0.002     | 0 | 18.84 | 18 | 105 | 0  | 0.98  |       |
| 1500.684 | 14 | Q641Q2,Q5SN1 | R.SRPTFADEL SRPT[166.998       | 0.291  | 0.002    | 0.002     | 0 | 33.46 | 18 | 105 | 0  | 1.52  |       |
| 1754.716 | 12 | Q641Q2,Q9Y4E | R.TPSDDEEDNL TPS[166.9984]C    | 0.639  | 6.40E-04 | -6.00E-04 | 0 | 34.94 | 16 | 105 | 0  | -0.37 |       |
| 2110.867 | 8  | Q659C4       | K.LNGPGENVSE LNGPGENV[1        | 1.585  | 8.20E-05 | 0.002     | 0 | 45.4  | 17 | 45  | 1  | 914   | 0.96  |
| 3340.462 | 17 | Q66K14       | R.KASVVDPSTE KAS[166.9984]3    | 1.138  | 0.003    | 0.004     | 1 | 31.7  | 18 | 54  | 4  | 1250  | 1.26  |
| 3132.4   | 23 | Q66K14       | K.ASVVDPSTES:ASVVDPSTESS       | 1.291  | 2.70E-04 | 0.003     | 0 | 40.7  | 18 | 54  | 4  | 1250  | 0.97  |
| 3132.4   | 29 | Q66K14       | K.ASVVDPSTES:ASVVDPSTESS       | 1.317  | 0.001    | 0.003     | 0 | 33.53 | 18 | 65  | 3  | 1250  | 0.97  |
| 3132.4   | 7  | Q66K14       | K.ASVVDPSTES:ASVVDPSTESS       | 1.205  | 2.20E-04 | 0.003     | 0 | 41.59 | 18 | 78  | 3  | 1250  | 0.97  |
| 865.454  | 5  | Q66K74       | R.LSLPLR G LSL[166.9984]2      | -0.423 | 0.009    | 5.00E-04  | 0 | 27.32 | 19 | 92  | 3  | 1059  | 0.62  |
| 1949.842 | 21 | Q66K74       | K.AVPMAPAPA AVPMAPAPAS[2       | 1.133  | 2.20E-04 | 0.002     | 0 | 41.88 | 18 | 74  | 3  | 1059  | 0.85  |
| 1783.727 | 9  | Q66P13       | R.SAGEEEDGPN S[166.9984]AG     | 0.234  | 0.002    | -0.001    | 0 | 32.89 | 18 | 92  | 3  | 360   | -0.81 |
| 2134.944 | 20 | Q676U5       | R.SVSSFPQDI S[166.9984]VSS     | -0.598 | 0.011    | 0.001     | 0 | 26.55 | 20 | 27  | 2  | 607   | 0.55  |
| 1852.823 | 11 | Q68C22       | R.GVSGGPHPPG GVSGGPHPPDT       | -0.54  | 0.011    | 0.002     | 0 | 25.14 | 18 | 25  | 2  | 1445  | 1     |
| 1398.63  | 9  | Q68D06       | K.YNLINGESP YNLINGES[166.      | 1.124  | 2.20E-04 | 0.002     | 0 | 41.79 | 18 | 42  | 1  | 897   | 1.33  |
| 2603.924 | 16 | Q68E01       | K.DESCVDNAE DES[160.0307       | 0.219  | 0.021    | 0.003     | 0 | 19.51 | 15 | 20  | 1  | 1043  | 1.07  |
| 1745.705 | 10 | Q69H5        | K.AGTDSPVSCA AGTDS[166.99      | 1.355  | 1.30E-04 | 0.002     | 0 | 44.1  | 18 | 44  | 2  | 1023  | 0.98  |
| 1243.535 | 10 | Q69Y4        | R.SFLSESPGR SFLSEPS[166.9      | -0.387 | 0.007    | 0.002     | 0 | 26.68 | 18 | 27  | 5  | 1812  | 1.09  |
| 1447.578 | 7  | Q69Y4        | R.EDYFEPSPDR EDYFEP[166.5      | -0.974 | 0.033    | 0.002     | 0 | 18.79 | 16 | 29  | 8  | 1812  | 1.59  |
| 1931.853 | 11 | Q69YQ0       | R.KGSSGNASEV KGS[166.9984]2    | 2.119  | 1.30E-07 | 0.001     | 1 | 75.26 | 19 | 113 | 4  | 1117  | 0.71  |
| 1803.758 | 9  | Q69YQ0       | K.GSSGNASEVS GSS[166.9984]2    | 1.696  | 5.70E-05 | 0.003     | 0 | 47.51 | 18 | 113 | 4  | 1117  | 1.57  |
| 1931.853 | 10 | Q69YQ0       | R.KGSSGNASEV KGS[166.9984]3    | 0.963  | 0.004    | 0.002     | 1 | 29.97 | 18 | 88  | 6  | 1117  | 1.28  |
| 1803.758 | 13 | Q69YQ0       | K.GSSGNASEVS GS[166.9984]S     | 1.409  | 1.10E-04 | 0.003     | 0 | 44.64 | 18 | 105 | 5  | 1117  | 1.57  |
| 1931.853 | 9  | Q69YQ0       | R.KGSSGNASEV KGS[166.9984]2    | 1.342  | 7.30E-04 | 0.002     | 1 | 37.11 | 18 | 133 | 4  | 1117  | 1.28  |
| 1254.555 | 5  | Q6DD88       | R.DAVVGRPSM DAVVGRPS[16        | -0.682 | 0.014    | 0.001     | 0 | 24.73 | 19 | 25  | 1  | 541   | 0.95  |
| 1279.506 | 11 | Q6DN90       | R.MQFSFGEPE MQFS[166.998       | 0.402  | 0.001    | 0.002     | 0 | 33.57 | 17 | 34  | 2  | 963   | 1.29  |
| 1687.711 | 9  | Q6DN90       | R.NSWDSPAFSI NS[166.9984]VA    | 1.459  | 1.20E-04 | -8.00E-04 | 0 | 45.12 | 18 | 65  | 3  | 963   | -0.46 |
| 1855.771 | 15 | Q6DT37       | R.RPASMSEGG RPAS[166.9984]3    | -0.062 | 0.037    | 0.001     | 0 | 20.7  | 19 | 21  | 2  | 1551  | 0.73  |
| 1335.608 | 8  | Q6DT37       | R.SLPLSELESS SLPLSELESS[1      | -0.463 | 0.008    | 0.003     | 0 | 26.9  | 19 | 28  | 3  | 1551  | 1.95  |
| 1435.683 | 6  | Q6GYQ0       | K.TVIDDADQLF T[181.014]VDI     | -1.073 | 0.037    | 0.002     | 0 | 19.82 | 18 | 83  | 3  | 2036  | 1.71  |
| 1307.635 | 9  | Q6GYQ0       | R.RGSSPGSLEIP RGS[166.9984]2   | 0.546  | 9.00E-04 | 0.002     | 1 | 36    | 18 | 72  | 3  | 2036  | 1.16  |
| 1747.779 | 10 | Q6GYQ0       | R.SSSTSDILEPFI SSST[166.9984]T | 2.024  | 2.60E-05 | 0.003     | 0 | 51.27 | 18 | 70  | 3  | 2036  | 1.49  |
| 1747.779 | 7  | Q6GYQ0       | R.SSSTSDILEPFI SSST[181.014]S  | 0.586  | 8.00E-04 | 0.003     | 0 | 36.41 | 18 | 63  | 3  | 2036  | 1.49  |
| 1307.635 | 4  | Q6GYQ0       | R.RGSSPGSLEIP RGS[166.9984]2   | -0.647 | 0.014    | 0.002     | 1 | 24.07 | 18 | 64  | 4  | 2036  | 1.16  |
| 1247.628 | 11 | Q6IAA8       | K.LLLDPSPPTK LLLDPS[166.9      | -0.183 | 0.004    | 0.001     | 0 | 29.72 | 19 | 30  | 1  | 161   | 0.82  |
| 2614.007 | 13 | Q6ICG6       | R.VSTGDTSPCG VSTGDT[166.5      | 1.291  | 4.10E-04 | -0.001    | 0 | 36.93 | 16 | 37  | 2  | 404   | -0.51 |
| 2693.973 | 10 | Q6ICG6       | R.VSTGDTSPCG VSTGDTSP[16       | -0.194 | 0.046    | 0.002     | 0 | 15.4  | 15 | 34  | 2  | 404   | 0.58  |
| 2693.973 | 17 | Q6ICG6       | R.VSTGDTSPCG VS[166.9984]T     | -0.078 | 0.035    | 0.002     | 0 | 16.57 | 15 | 53  | 2  | 404   | 0.58  |
| 1505.569 | 8  | Q6ICG6       | K.SHSANDSEEF SHS[166.9984]2    | -1.061 | 0.038    | 0.002     | 0 | 15.95 | 14 | 38  | 3  | 404   | 1.49  |
| 2693.973 | 11 | Q6ICG6       | R.VSTGDTSPCG VSTGDTSP[16       | 0.188  | 0.019    | 0.002     | 0 | 19.25 | 15 | 25  | 3  | 404   | 0.58  |
| 1663.755 | 13 | Q6IQ22       | R.AGGGGGLGA AGGGGGGLGAG        | 2.003  | 3.30E-05 | 0.001     | 0 | 51.58 | 19 | 52  | 2  | 244   | 0.66  |
| 2329.082 | 11 | Q6IO49       | R.VVNTDHGSP VVNTDHGS[16        | 0.563  | 0.009    | 0.003     | 0 | 25.95 | 18 | 26  | 1  | 451   | 1.37  |
| 2329.082 | 12 | Q6IO49       | R.VVNTDHGSP VVNT[181.014]      | 1.342  | 0.001    | 0.003     | 0 | 34.51 | 18 | 35  | 1  | 451   | 1.37  |
| 2720.055 | 9  | Q6KC79       | K.NNTAAETEDI NNTAAET[181       | 0.352  | 0.016    | 0.002     | 1 | 22.86 | 17 | 57  | 6  | 2804  | 0.8   |
| 1180.597 | 7  | Q6KC79       | K.AITSLGGGGSF AITSLGGGS[1      | 0.966  | 3.30E-04 | 0.002     | 0 | 41.21 | 19 | 153 | 8  | 2804  | 1.6   |
| 1947.672 | 10 | Q6KC79       | K.NNTAAETEDI NNTAAETEDDE       | 1.527  | 9.50E-05 | 0.002     | 0 | 40.82 | 13 | 153 | 8  | 2804  | 1.17  |
| 1362.601 | 8  | Q6KC79       | K.AAMYDIHSSP: AAMYDIHSS[16     | 1.836  | 4.50E-05 | 0.002     | 0 | 49.91 | 19 | 153 | 8  | 2804  | 1.43  |
| 2720.055 |    |              |                                |        |          |           |   |       |    |     |    |       |       |

|          |    |              |                                       |        |          |           |   |       |    |     |    |      |       |
|----------|----|--------------|---------------------------------------|--------|----------|-----------|---|-------|----|-----|----|------|-------|
| 1075.446 | 4  | Q6P4Q7       | R.SASLSYPRDR.T SAS[166.9984]I 2       | -1.098 | 0.039    | 0.001     | 0 | 20.57 | 19 | 21  | 2  | 775  | 1.07  |
| 1336.578 | 9  | Q6P597       | R.TLSASTODLSF.TLSASTODLS[166.9984]I 2 | -1.074 | 0.039    | 0.002     | 0 | 20.81 | 19 | 21  | 2  | 504  | 1.24  |
| 1882.68  | 12 | Q6P6C2       | K.SYSESDCESEF.SYSESDCESE[166.9984]I 2 | -2.159 | 2.60E-08 | 0.002     | 0 | 78.6  | 15 | 109 | 4  | 394  | 0.87  |
| 2466.993 | 17 | Q6P6C2       | K.YQEDSDPERS.YQEDSD[166.9984]I 2      | 1.291  | 3.70E-04 | 0.003     | 1 | 39.19 | 17 | 109 | 4  | 394  | 1.11  |
| 1468.6   | 7  | Q6P6C2       | R.RGSFSESNYWR.RGSF[166.9984]I 2       | -0.895 | 0.023    | 0.002     | 1 | 20.6  | 17 | 109 | 4  | 394  | 1.37  |
| 1312.499 | 11 | Q6P6C2       | R.GSFSESNYWF.RGSF[166.9984]I 2        | -0.922 | 0.026    | 0.002     | 0 | 18.33 | 15 | 109 | 4  | 394  | 1.46  |
| 1882.68  | 9  | Q6P6C2       | K.SYSESDCESEF.SYSESDCESE[166.9984]I 2 | 0.907  | 4.00E-04 | 0.002     | 0 | 36.61 | 15 | 130 | 6  | 394  | 0.87  |
| 1882.68  | 12 | Q6P6C2       | K.SYSESDCESEF.SYSESDCESE[166.9984]I 2 | 0.599  | 7.30E-04 | 0.001     | 0 | 33.52 | 15 | 183 | 7  | 394  | 0.66  |
| 1882.68  | 9  | Q6P6C2       | K.SYSESDCESEF.SYSESDCESE[166.9984]I 2 | 1.476  | 9.70E-05 | 0.001     | 0 | 42.29 | 15 | 181 | 6  | 394  | 0.66  |
| 2083.907 | 10 | Q6P996       | R.GSDALSETSI.GSDALS[166.9984]I 2      | 0.058  | 0.03     | 0.003     | 0 | 20.94 | 18 | 21  | 1  | 788  | 1.3   |
| 1883.718 | 9  | Q6P062       | K.GEGESDDDEI.GEGES[166.9984]I 2       | 0.047  | 0.032    | 0.003     | 0 | 17.79 | 15 | 53  | 5  | 1173 | 1.51  |
| 2436.013 | 25 | Q6P062       | K.KGGEFDEFVW.KGGEFDEFVND 3            | 0.002  | 0.03     | 0.005     | 1 | 20.38 | 18 | 24  | 3  | 1173 | 1.91  |
| 1120.565 | 4  | Q6PGN9       | R.LSLGLSPEK.LLSLGLS[166.9984]I 2      | -0.372 | 0.007    | 0.002     | 0 | 24.82 | 16 | 25  | 1  | 363  | 1.93  |
| 1607.746 | 16 | Q6PID6       | K.KSEAPAEVTH.KSEAPAEVTHFS 3           | 0.794  | 0.005    | 0         | 1 | 29.26 | 19 | 39  | 2  | 262  | 2.00  |
| 1479.651 | 10 | Q6PID6       | K.KSEAPAEVTH.KSEAPAEVTHFS 2           | -0.183 | 0.004    | 0.002     | 0 | 28.72 | 18 | 39  | 2  | 262  | 1.2   |
| 2259.897 | 14 | Q6PIW4       | K.FSVCGSSQESI.FSVCG[160.0307] 3       | -0.071 | 0.039    | 0.002     | 0 | 18.65 | 17 | 19  | 3  | 674  | 1.05  |
| 2525.126 | 7  | Q6PIF5       | R.DLELPSQEA.P.DLELPSQEA 3             | 1.291  | 5.00E-04 | 0.005     | 0 | 38.53 | 18 | 39  | 1  | 856  | 2.08  |
| 2525.126 | 12 | Q6PIF5       | R.DLELPSQEA.P.DLELPSQEA 3             | 0.294  | 0.017    | 0.005     | 0 | 23.29 | 18 | 37  | 3  | 856  | 2.08  |
| 995.456  | 6  | Q6PIF5       | K.SVSLQEP.R.S.VS[166.9984]I 2         | 0.119  | 0.002    | 4.00E-04  | 0 | 30.74 | 17 | 37  | 3  | 856  | 0.37  |
| 1451.653 | 5  | Q6PIG6       | R.GSPNTASAEA.GSPNT[181.014]I 2        | -0.739 | 0.016    | 0.003     | 0 | 23.16 | 17 | 23  | 1  | 821  | 2.22  |
| 1451.653 | 9  | Q6PIG6       | R.GSPNTASAEA.GS[166.9984]I 2          | -1.116 | 0.039    | 0.003     | 0 | 19.42 | 18 | 19  | 1  | 821  | 2.22  |
| 2119.897 | 14 | Q6PII9       | R.EAEHLSPWC.EAEHLSPWGE 3              | 0.152  | 0.025    | 0.003     | 0 | 20.88 | 17 | 21  | 2  | 974  | 1.24  |
| 1881.884 | 8  | Q6PIJ5       | K.VVESLPSSES.VVESLPSSESQ 2            | 0.281  | 0.002    | 1.00E-04  | 0 | 33.36 | 18 | 33  | 1  | 311  | 1.05  |
| 1881.884 | 9  | Q6PIJ5       | K.VVESLPSSES.VVESLPSSES[16 2          | -0.48  | 0.01     | 1.00E-04  | 0 | 25.75 | 18 | 31  | 1  | 311  | 0.05  |
| 1864.714 | 9  | Q6PIJ7       | K.NGDECAYHH.NGDEC[160.03] 3           | 0.138  | 0.027    | 0.002     | 0 | 19.7  | 16 | 21  | 3  | 736  | 0.9   |
| 1374.667 | 12 | Q6PIJ7       | R.DLVQDPKAS.DLVQDPKAS[1 2             | -1.019 | 0.034    | 0.001     | 0 | 19.39 | 17 | 19  | 3  | 736  | 1.05  |
| 3607.641 | 15 | Q6PKG0       | R.ESPRPLQPG.ESPRPLQPGA 3              | 1.291  | 2.20E-05 | 0.003     | 0 | 51.39 | 17 | 87  | 6  | 1096 | 0.87  |
| 1540.704 | 6  | Q6PKG0       | R.SLPTTVPEPN.SLPTTVPE[166 2           | -0.419 | 0.008    | 0.002     | 0 | 26.36 | 18 | 89  | 5  | 1096 | 1.04  |
| 1620.671 | 4  | Q6PKG0       | R.SLPTTVPEPN.S[166.9984]LPT 2         | -1.113 | 0.039    | 0.002     | 0 | 18.45 | 17 | 86  | 5  | 1096 | 1.41  |
| 1620.671 | 8  | Q6PKG0       | R.SLPTTVPEPN.S[166.9984]LPT 2         | -1.011 | 0.031    | 0.002     | 0 | 19.42 | 17 | 88  | 5  | 1096 | 1.41  |
| 3490.377 | 18 | Q6PLI8       | K.IESDTEETQDI.IES[166.9984]D 3        | 1.291  | 4.70E-04 | 0.001     | 0 | 37.68 | 17 | 38  | 2  | 1390 | 0.32  |
| 3570.344 | 18 | Q6PLI8       | K.IESDTEETQDI.IES[166.9984]D 3        | 0.416  | 0.011    | 0.005     | 0 | 22.51 | 16 | 63  | 4  | 1390 | 1.54  |
| 1047.476 | 4  | Q6R327       | K.KALSASLDK.E.ALSYAS[166.99 2         | -0.665 | 0.016    | 8.00E-04  | 0 | 22.9  | 17 | 101 | 5  | 1708 | 0.78  |
| 1039.543 | 11 | Q6R327       | K.STELLGVK.T.ST[181.014]EL 2          | 1.1    | 2.60E-04 | 0.003     | 0 | 40.55 | 17 | 101 | 5  | 1708 | 0.5   |
| 2258.927 | 14 | Q6R327       | R.HNSESEVPS.HNSESES[166.9 3           | 0.937  | 0.004    | 0.003     | 0 | 29.69 | 18 | 101 | 5  | 1708 | 1.46  |
| 1638.701 | 8  | Q6R327       | R.NDSGEENVPI.NDS[166.9984] 2          | 1.151  | 2.30E-04 | 0.003     | 0 | 42.06 | 18 | 81  | 6  | 1708 | 1.79  |
| 1851.823 | 11 | Q6R327       | R.GRNDGSEEN.GRND[166.99 3             | 0.067  | 0.03     | 0.002     | 1 | 20.99 | 18 | 101 | 5  | 1708 | 0.9   |
| 1039.543 | 13 | Q6R327       | K.STELLGVK.T.S[166.9984]TEL 2         | 1.76   | 5.70E-05 | 5.00E-04  | 0 | 47.15 | 17 | 81  | 6  | 1708 | 0.5   |
| 2258.927 | 9  | Q6R327       | R.HNSESEVPS.HNS[166.9984] 3           | 1.144  | 0.002    | 0.003     | 0 | 31.79 | 18 | 112 | 5  | 1708 | 1.46  |
| 1652.716 | 12 | Q6T4R5       | R.VQEQIDSDS.VQEQID[166.9 2            | 0.318  | 0.002    | 8.00E-04  | 0 | 33.73 | 18 | 35  | 3  | 1630 | 0.47  |
| 1585.714 | 7  | Q6T4R5       | R.ATTPSPVSDI.ATT[181.014]P 2          | -1.151 | 0.041    | 0.001     | 0 | 19.04 | 18 | 35  | 3  | 1630 | 2.31  |
| 2850.304 | 22 | Q6T4R5       | K.APSAGLEEV.APSAGLEEV 3               | 1.393  | 1.00E-04 | 0.003     | 0 | 45.64 | 18 | 70  | 8  | 1630 | 0.96  |
| 2101.882 | 5  | Q6UB98       | R.DNSPDSTPN.DNS[166.9984] 3           | 0.254  | 0.022    | 0.003     | 0 | 21.89 | 18 | 22  | 3  | 2062 | 1.41  |
| 2215.921 | 9  | Q6UB98       | K.KIDEDHPTFE.KIDEDHS[166.9 3          | 0.027  | 0.03     | 0.002     | 1 | 20.6  | 18 | 21  | 4  | 2062 | 0.99  |
| 1047.414 | 5  | Q6UB99       | K.FSLSDQDR.D.FSL[166.9984] 2          | -1.175 | 0.045    | 7.00E-04  | 0 | 17.83 | 17 | 18  | 4  | 2663 | 0.69  |
| 1796.712 | 10 | Q6UN15       | R.DHSPTSPVFN.DHS[166.9984] 3          | 1.291  | 3.30E-04 | 0.003     | 0 | 39.34 | 17 | 138 | 5  | 594  | 1.44  |
| 2081.856 | 7  | Q6UN15       | R.ERDHSPTSPV.ERDHSPT[181. 3           | 0.914  | 0.004    | 0.003     | 1 | 29.48 | 18 | 127 | 5  | 594  | 1.49  |
| 1876.679 | 11 | Q6UN15       | R.DHSPTSPVFN.DHS[166.9984] 2          | 2.159  | 1.20E-05 | -2.00E-04 | 0 | 52.02 | 15 | 138 | 5  | 594  | -0.12 |
| 1796.712 | 9  | Q6UN15       | R.DHSPTSPVFN.DHSPT[166.9 3            | 1.145  | 0.002    | 0.003     | 0 | 30.81 | 17 | 87  | 5  | 594  | 1.44  |
| 2081.856 | 7  | Q6UN15       | R.ERDHSPTSPV.ERDHS[166.99 3           | 1.127  | 0.001    | 0.003     | 1 | 34.83 | 18 | 121 | 4  | 594  | 1.49  |
| 3312.411 | 16 | Q6UUV9       | R.TNSDSALHQS.TNS[166.9984] 3          | 0.726  | 0.007    | 0.003     | 0 | 27.6  | 18 | 28  | 1  | 634  | 0.97  |
| 3312.411 | 19 | Q6UUV9       | R.TNSDSALHQS.TNS[166.998 3            | 0.713  | 0.007    | 0.003     | 0 | 27.45 | 18 | 27  | 1  | 634  | 0.97  |
| 3312.411 | 28 | Q6UUV9       | R.TNSDSALHQS.T[181.014]NSD 3          | 1.097  | 0.003    | 0.003     | 0 | 31.31 | 18 | 31  | 1  | 634  | 0.97  |
| 1327.535 | 8  | Q6UWZ7       | K.GFGEYSRPTI.GFGEYSRS[166 2           | -0.552 | 0.01     | 0.003     | 1 | 23.03 | 16 | 23  | 1  | 409  | 2.37  |
| 1757.632 | 8  | Q6VN20       | K.HEDLQDDESS.HEDLQDDES[16 2           | 0.007  | 0.003    | 0.001     | 0 | 28.62 | 16 | 29  | 1  | 620  | 0.8   |
| 2549.166 | 12 | Q6WJ29       | R.KVSGDSSHTE.KVSGDSSHTE[ 3            | 0.178  | 0.024    | 0.008     | 1 | 22.12 | 18 | 22  | 2  | 1755 | 2.97  |
| 2549.166 | 19 | Q6WJ29       | R.KVSGDSSHTE.KVSGDSSHTE[18 3          | 0.156  | 0.025    | 0.008     | 1 | 21.91 | 18 | 22  | 2  | 1755 | 2.97  |
| 2549.166 | 11 | Q6WJ29       | R.KVSGDSSHTE.KVSGDSSHTE[16 3          | -0.107 | 0.047    | 0.008     | 1 | 19.29 | 18 | 19  | 2  | 1755 | 2.97  |
| 1909.89  | 10 | Q6WCO1       | R.TLLTGDGGGT.TLLTGDGGGEA 2            | 1.07   | 2.70E-04 | 0.002     | 0 | 42.25 | 18 | 77  | 8  | 1025 | 0.79  |
| 1550.644 | 11 | Q6WCO1       | K.SPDSATVSGY.S[166.9984]PD 2          | 1.126  | 2.60E-04 | 0.002     | 0 | 39.81 | 16 | 77  | 8  | 1025 | 1.48  |
| 2675.194 | 11 | Q6WCO1       | K.DQPDGSSLS.DQPDGSSLS[16 3            | 0.604  | 0.008    | 0.002     | 0 | 25.38 | 17 | 75  | 5  | 1025 | 0.85  |
| 1124.506 | 6  | Q6WCO1       | R.SPGLPMSDLK.S[166.9984]PG 2          | -0.494 | 0.011    | 0.001     | 0 | 23.61 | 16 | 77  | 8  | 1025 | 1.14  |
| 900.386  | 3  | Q6WCO1       | K.SNPDPFLK.S[166.9984]NPI 2           | -1.044 | 0.037    | 7.00E-04  | 0 | 19.11 | 17 | 54  | 4  | 1025 | 0.82  |
| 2439.074 | 20 | Q6WCO1       | K.AEEQQLPPL.AEEQQLPPLS[ 3             | 0.219  | 0.021    | 0.005     | 0 | 23.54 | 19 | 68  | 4  | 1025 | 2.13  |
| 2675.194 | 22 | Q6WCO1       | K.DQPDGSSLS.DQPDGSSLS[166. 3          | 0.518  | 0.01     | 0.002     | 0 | 24.51 | 17 | 51  | 4  | 1025 | 0.85  |
| 2439.074 | 10 | Q6WCO1       | K.AEEQQLPPL.AEEQQLPPLS[ 3             | 0.445  | 0.013    | 0.005     | 0 | 25.79 | 19 | 54  | 4  | 1025 | 2.13  |
| 2760.198 | 17 | Q6WKZ4       | K.DSGSDTASAI.DSGSDTASAIH 3            | -0.134 | 0.046    | 0.003     | 0 | 18.98 | 18 | 35  | 4  | 1283 | 1.02  |
| 1377.641 | 15 | Q6WKZ4       | R.LEVSPQAQPT.LEVS[166.9984] 2         | 0.276  | 0.002    | 4.00E-04  | 0 | 34.31 | 19 | 35  | 4  | 1283 | 0.32  |
| 3783.636 | 21 | Q6Y7W6       | R.VGVEASEETP.VGVEASEETPQ 4            | 0.146  | 0.024    | 0.002     | 0 | 22.03 | 18 | 22  | 2  | 1299 | 0.4   |
| 1284.563 | 10 | Q6Y7W6       | R.WRPHSDGDP.WRPHS[166.99 3            | 0.167  | 0.022    | 7.00E-04  | 0 | 22.02 | 18 | 25  | 3  | 1299 | 0.52  |
| 3783.636 | 15 | Q6Y7W6       | R.VGVEASEETP.VGVEASEETPQ 3            | 1.223  | 0.002    | 0.005     | 0 | 33.58 | 19 | 46  | 4  | 1299 | 1.43  |
| 3783.636 | 26 | Q6Y7W6       | R.VGVEASEETP.VGVEASEETPQ 4            | -0.295 | 0.008    | 0.002     | 0 | 27.06 | 18 | 46  | 4  | 1299 | 0.4   |
| 1700.731 | 7  | Q6ZN18       | R.RGSELEMSDC.RGS[166.9984] 2          | -0.262 | 0.006    | 0.002     | 1 | 26.93 | 17 | 27  | 2  | 517  | 1.23  |
| 722.291  | 4  | Q6ZN32,01554 | K.FNFSK.L.FNFS[166.9984] 2            | -1.164 | 0.047    | 0.001     | 0 | 13.91 | 13 | 18  |    | 152  | 1.82  |
| 1010.528 | 3  | Q6ZRK6       | K.LLLKNSDK.N.LLLKNS[166.99 2          | -1.081 | 0.035    | 8.00E-04  | 1 | 22.73 | 21 | 23  | 1  | 1079 | 0.84  |
| 2418.034 | 21 | Q6ZRS2       | R.DEEQSEADAC.DEEQSEADAGS 3            | 0.028  | 0.029    | 0.006     | 0 | 22.61 | 20 | 23  | 6  | 3230 | 2.38  |
| 1456.658 | 8  | Q6ZRV2       | K.VPVPVPGSG.VPVPVPGS[166 2            | -0.585 | 0.013    | 0.002     | 0 | 24.7  | 18 | 195 | 12 | 1179 | 1     |
| 1400.657 | 11 | Q6ZRV2       | R.RGSPPTGFIE.RGS[166.9984] 2          | -0.179 | 0.004    | 0.002     | 1 | 29.76 | 19 | 195 | 12 | 1179 | 1.31  |
| 1899.844 | 13 | Q6ZRV2       | R.RLSLQGGDST.RLS[166.9984]L 2         | 2.642  | 2.40E-07 | 0.001     | 1 | 73.22 | 20 | 195 | 12 | 1179 | 0.76  |
| 1270.63  | 8  | Q6ZRV2       | R.RGSPVPPVPE.RGS[166.9984] 2          | 1.044  | 2.90E-04 | 0.002     | 1 | 39.99 | 17 | 195 | 12 | 1179 | 1.22  |
| 1300.641 | 5  | Q6ZRV2       | R.RSSPVPVPE.RSS[166.9984]F 2          | -0.936 | 0.029    | 0.002     | 1 | 21.19 | 18 | 195 | 12 | 1179 | 1.45  |
| 1174.514 | 4  | Q6ZRV2       | R.LDYVPSSASR.LDYVPSSAS[16 2           | -0.551 | 0.01     | 7.00E-04  | 0 | 26.04 | 19 | 195 | 12 | 1179 | 0.62  |
| 1288.547 | 16 | Q6ZRV2       | R.HGSDPAFAPK.HGS[166.9984] 2          | 0.151  | 0.002    | 0.001     | 0 | 30.06 | 16 | 176 | 12 | 1179 | 1.07  |
| 1214.557 | 7  | Q6ZRV2       | R.KGSPPTGFSTI.KGS[166.9984] 2         | -0.746 | 0.019    | 0.002     | 1 | 23.09 | 18 | 195 | 12 | 1179 | 1.29  |
| 1086.462 | 6  | Q6ZRV2       | K.GSPTPGFSTR.GS[166.9984]P 2          | -0.998 | 0.034    | 0.001     | 0 | 20.6  | 18 | 156 | 11 | 1179 | 1.13  |
| 1174.514 | 4  | Q6ZRV2       | R.LDYVPSSASR.LDYVPSS[166.9 2          | -1.229 | 0.049    | 7.00E-04  | 0 | 19.24 | 19 | 164 | 12 | 1179 | 0.62  |
| 1400.657 |    |              |                                       |        |          |           |   |       |    |     |    |      |       |



|          |    |        |                                    |        |          |          |           |       |       |     |     |      |      |       |
|----------|----|--------|------------------------------------|--------|----------|----------|-----------|-------|-------|-----|-----|------|------|-------|
| 1798.826 | 10 | Q76L83 | R.KSSLTQEAPK KSS[166.9984]L        | 2      | 0.959    | 3.40E-04 | 0.001     | 1     | 41.14 | 19  | 41  | 5    | 1435 | 0.7   |
| 1215.613 | 7  | Q7K2I7 | K.VPASPPLGLEF VPA5[166.9984]2      | 0.724  | 6.50E-04 | 0.001    | 0         | 38.79 | 19    | 39  | 2   | 788  | 1.08 |       |
| 2052.888 | 15 | Q7K2I7 | R.GRNSATSAID GRNS[166.9984]3       | 0.073  | 0.028    | 0.002    | 1         | 21.09 | 18    | 26  | 2   | 788  | 0.98 |       |
| 1604.512 | 15 | Q7L1Q6 | K.NAAEESEEA NAEFE5[166.99]2        | 1.64   | 6.40E-05 | 0.002    | 0         | 41.95 | 13    | 42  | 1   | 419  | 1.44 |       |
| 1610.604 | 10 | Q7L2E3 | R.GSSFEMTDDI GSS[166.9984]1        | 2.219  | 2.00E-05 | 0.003    | 0         | 49.58 | 15    | 50  | 1   | 1194 | 1.61 |       |
| 1610.604 | 7  | Q7L2E3 | R.GSSFEMTDDI S[166.9984]SI         | 2      | -0.94    | 0.028    | 0.003     | 0     | 18.18 | 15  | 18  | 1    | 1194 | 1.61  |
| 1946.835 | 18 | Q7L2I0 | R.ESPGAATSS ES[166.9984]PC         | 2      | -0.626   | 0.014    | 0.003     | 0     | 23.29 | 17  | 30  | 3    | 689  | 1.61  |
| 1351.582 | 9  | Q7L2I0 | R.CAPSAGSPAAC[160.0307]AP          | 2      | 0.091    | 0.002    | 0.002     | 0     | 31.44 | 18  | 62  | 3    | 689  | 1.84  |
| 1328.672 | 4  | Q7L311 | K.KATPGAHTGJ KAT[181.014]P         | 3      | -0.184   | 0.045    | -5.00E-04 | 1     | 18.51 | 18  | 19  | 1    | 632  | -0.38 |
| 1850.78  | 6  | Q7L4E1 | R.NPETASEPLSI NPETASEPLS[16        | 2      | 0.069    | 0.003    | -7.00E-04 | 0     | 31.24 | 18  | 31  | 1    | 593  | -0.4  |
| 1197.515 | 5  | Q7L4I2 | K.EQSEVSVSPR EQSEVSVS[166.2        | 2      | -0.35    | 0.007    | 0.003     | 0     | 26.05 | 17  | 38  | 2    | 434  | 2.33  |
| 1882.879 | 16 | Q7L5N7 | K.QEVTTPSTASI EQVTTPSTASNI         | 2      | 0.526    | 0.001    | 0.002     | 1     | 34.81 | 17  | 35  | 2    | 544  | 0.98  |
| 1348.589 | 8  | Q7L7X3 | R.ASDPQSPPOQ ASDPQS[166.99]2       | -0.424 | 0.009    | 0.002    | 0         | 26.31 | 18    | 26  | 1   | 1001 | 1.5  |       |
| 3772.719 | 16 | Q7L8I4 | R.ETPQGELRPE ET[181.014]PQ         | 4      | -0.199   | 0.045    | 0.002     | 1     | 18.61 | 18  | 19  | 1    | 393  | 0.58  |
| 3772.719 | 17 | Q7L8I4 | R.ETPQGELRPE ETPQGELRPEV4          | 4      | -0.055   | 0.032    | 0.002     | 1     | 20.06 | 18  | 20  | 1    | 393  | 0.58  |
| 1591.784 | 5  | Q7RTP6 | K.DRLGSLAVD DRLGS[166.998]3        | 0.557  | 0.009    | 0.001    | 1         | 25.89 | 18    | 53  | 4   | 2002 | 0.8  |       |
| 1320.656 | 9  | Q7RTP6 | R.LGSLAVDEA LGS[166.9984]2         | 1.443  | 1.10E-04 | 0.002    | 0         | 44.98 | 18    | 53  | 4   | 2002 | 1.91 |       |
| 1571.579 | 7  | Q7Z2X8 | R.SPSGAGEGA SPS[166.9984]C         | 2      | -0.664   | 0.013    | 0.004     | 0     | 20.91 | 15  | 21  | 4    | 1008 | 2.49  |
| 1571.579 | 9  | Q7Z2X8 | R.SPSGAGEGA S[166.9984]P5C         | 2      | 0.886    | 3.80E-04 | 0.004     | 0     | 36.39 | 15  | 36  | 3    | 1008 | 2.49  |
| 2897.211 | 11 | Q7Z2T5 | K.YSTPTTYGGQ YSTPTTYGGQSI          | 3      | 1.291    | 0.001    | 2.00E-04  | 0     | 33.14 | 16  | 21  | 2    | 733  | 0.07  |
| 2897.211 | 12 | Q7Z2T5 | K.YSTPTTYGGQ YSTPTTYGGQSI          | 3      | 0.222    | 0.02     | 2.00E-04  | 0     | 20.56 | 16  | 21  | 2    | 733  | 0.07  |
| 2897.211 | 13 | Q7Z2T5 | K.YSTPTTYGGQ YSTPTTYGGQSI          | 3      | 0.164    | 0.023    | 2.00E-04  | 0     | 19.98 | 16  | 20  | 2    | 733  | 0.07  |
| 1481.652 | 8  | Q7Z2W4 | R.ASLEDAVDD AS[166.9984]L2         | 2      | 2.172    | 1.40E-05 | 0.003     | 0     | 55.39 | 19  | 55  | 4    | 902  | 1.8   |
| 1452.608 | 11 | Q7Z2Z1 | K.IECPSPGELDC IEC[160.0307]P       | 2      | -1.182   | 0.046    | 0.001     | 0     | 18.73 | 18  | 41  | 6    | 1910 | 0.75  |
| 1196.567 | 4  | Q7Z2Z1 | K.SIAEVSQNL R S[166.9984]AE        | 2      | -0.815   | 0.022    | 0.002     | 0     | 23.4  | 19  | 41  | 6    | 1910 | 1.29  |
| 1821.779 | 16 | Q7Z2Z1 | R.SSDPGDQIV SDDPGDQIVV6            | 2      | 0.371    | 0.001    | 0.003     | 0     | 33.26 | 17  | 41  | 6    | 1910 | 1.54  |
| 1712.737 | 8  | Q7Z2Z1 | R.SVSGSPSDEI SVS[166.998]2         | -0.882 | 0.026    | 0.002    | 0         | 21.73 | 18    | 36  | 5   | 1910 | 1.2  |       |
| 2837.229 | 19 | Q7Z2Z1 | R.SIVSQPDAS SIVC[160.030]C         | 2      | 0.158    | 0.022    | 0.003     | 0     | 20.93 | 17  | 58  | 5    | 1910 | 0.9   |
| 1712.737 | 14 | Q7Z2Z1 | R.SVSGSPSDEI SVS[166.99]2          | -0.121 | 0.004    | 0.002    | 0         | 29.32 | 18    | 58  | 5   | 1910 | 1.2  |       |
| 1401.605 | 7  | Q7Z2Z1 | K.LHPDGSPOVA LHPDGS[166.99]2       | -0.807 | 0.022    | 0.003    | 0         | 22.46 | 18    | 58  | 5   | 1910 | 2.43 |       |
| 1800.808 | 11 | Q7Z309 | R.RIDFTVPSPAF RIDFTVPS[166.1       | 2      | 0.144    | 0.002    | 0.002     | 1     | 33.99 | 20  | 31  | 3    | 247  | 1.26  |
| 1644.707 | 10 | Q7Z309 | R.IDFTVPSPAF IDFTVPS[166.99]2      | 0.119  | 0.002    | 0.002    | 0         | 32.72 | 19    | 56  | 3   | 247  | 1.5  |       |
| 1479.613 | 8  | Q7Z309 | R.HSLEGLDMH HS[166.9984]L2         | 2      | -1.075   | 0.036    | 0.002     | 0     | 19.79 | 18  | 55  | 4    | 247  | 1.19  |
| 1800.808 | 7  | Q7Z309 | K.RIDFTVPSPAF RIDFTVPS[166.1       | 2      | -1.175   | 0.046    | 0.002     | 1     | 20.8  | 20  | 21  | 2    | 247  | 1.26  |
| 1689.665 | 10 | Q7Z333 | K.DMHCLAEASF DMHC[160.030]2        | -0.229 | 0.005    | 0.001    | 0         | 26.24 | 16    | 26  | 6   | 2677 | 0.82 |       |
| 1689.665 | 13 | Q7Z333 | K.DMHCLAEASF DMHC[160.030]2        | 0.089  | 0.002    | 0.001    | 0         | 29.42 | 16    | 30  | 4   | 2677 | 0.82 |       |
| 1814.868 | 8  | Q7Z340 | K.DILPAAEHQT DILPAAEHQTT5          | 2      | -1.108   | 0.036    | 6.00E-04  | 0     | 20.46 | 19  | 20  | 2    | 670  | 0.33  |
| 1498.678 | 6  | Q7Z3B3 | R.LSPGDTSSSNI LS[166.9984]PC       | 2      | -0.766   | 0.02     | 0.003     | 0     | 22.87 | 18  | 40  | 3    | 1105 | 1.74  |
| 2522.065 | 9  | Q7Z3B3 | R.TFPLAHSPOA TFPLAHS[166.9]3       | 1.291  | 0.002    | 0.002    | 0         | 33.39 | 18    | 44  | 3   | 1105 | 0.98 |       |
| 2522.065 | 10 | Q7Z3B3 | R.TFPLAHSPOA T[181.014]PLF         | 3      | 1.317    | 9.80E-05 | 0.002     | 0     | 45.58 | 18  | 46  | 1    | 1105 | 0.98  |
| 2014.762 | 14 | Q7Z3C6 | R.RESDGEGESA RES[166.9984]J        | 2      | 5.024    | 1.40E-05 | 0.003     | 1     | 51.72 | 16  | 52  | 2    | 839  | 1.47  |
| 2002.937 | 14 | Q7Z3K3 | K.SLSDSEPVSPA SLSDSEPVSPA          | 3      | -0.049   | 0.035    | 0.004     | 0     | 19.87 | 18  | 20  | 2    | 1410 | 1.82  |
| 1847.915 | 11 | Q7Z3T8 | R.NEIQSPISQVI NEIQS[166.99]2       | 2      | -0.468   | 0.009    | 0.003     | 0     | 24.87 | 17  | 25  | 3    | 1539 | 1.46  |
| 1967.861 | 9  | Q7Z401 | K.SDNETNLQXQ S[166.9984]DN         | 2      | -0.415   | 0.009    | 0.003     | 0     | 25.4  | 17  | 25  | 2    | 1863 | 1.73  |
| 1587.653 | 5  | Q7Z401 | R.RGDTSTEDIQ RGDTS[166.99]2        | 2      | -0.758   | 0.016    | 0.003     | 1     | 21.97 | 17  | 22  | 4    | 1863 | 1.65  |
| 3391.412 | 15 | Q7Z406 | R.LEEGVASDEE LEEGVASDEEA           | 3      | 0.732    | 0.007    | 0.002     | 0     | 27.67 | 18  | 28  | 3    | 1995 | 0.64  |
| 3391.412 | 20 | Q7Z406 | R.LEEGVASDEE LEEGVAS[166.9]3       | 1.101  | 4.20E-05 | 0.002    | 0         | 49.69 | 18    | 50  | 4   | 1995 | 0.64 |       |
| 3471.378 | 21 | Q7Z406 | R.LEEGVASDEE LEEGVAS[166.9]3       | 0.072  | 0.03     | 0.004    | 0         | 20.05 | 17    | 61  | 3   | 1995 | 1.25 |       |
| 1483.642 | 9  | Q7Z417 | K.NLSSDEATNP NLS[166.9984]2        | 2.159  | 4.60E-06 | 0.002    | 0         | 59.53 | 19    | 183 | 4   | 695  | 1.48 |       |
| 1276.499 | 8  | Q7Z417 | R.NDSWGSFDLI NDS[166.9984]2        | 0.798  | 4.60E-04 | 0.002    | 0         | 36.53 | 16    | 183 | 4   | 695  | 1.88 |       |
| 1722.649 | 13 | Q7Z417 | K.GADNDGSGS GADNDGSG[166]2         | 2.159  | 4.00E-06 | 0.002    | 0         | 57.05 | 16    | 183 | 4   | 695  | 1.31 |       |
| 2445.202 | 12 | Q7Z422 | R.ILGSAPEEEC ILGSA[166.99]3        | 1.076  | 0.003    | 0.002    | 0         | 29.08 | 16    | 47  | 2   | 152  | 0.84 |       |
| 3477.552 | 18 | Q7Z434 | K.EPSYMPMPQV EPSPYMPMPQVET         | 3      | 0.176    | 0.021    | 0.003     | 0     | 23.1  | 19  | 23  | 1    | 540  | 0.97  |
| 1827.798 | 20 | Q7Z460 | R.RQSSGSATNR RQS[166.9984]2        | -0.608 | 0.012    | 0.003    | 1         | 26.47 | 20    | 117 | 6   | 1538 | 1.59 |       |
| 1827.798 | 14 | Q7Z460 | R.RQSSGSATNR RQSSGS[166.99]3       | -0.105 | 0.038    | 0.003    | 1         | 21.29 | 20    | 163 | 7   | 1538 | 1.65 |       |
| 1484.674 | 13 | Q7Z460 | R.SRSDIDVNA SRS[166.9984]C         | 2      | 2.159    | 1.50E-06 | 0.003     | 1     | 61.23 | 16  | 117 | 6    | 1538 | 1.79  |
| 1657.718 | 7  | Q7Z460 | K.NSSNTSVGSP NSSNTSVGSPS[2         | 2.159  | 1.60E-05 | 0.002    | 0         | 52.8  | 17    | 117 | 6   | 1538 | 0.89 |       |
| 1827.798 | 16 | Q7Z460 | R.RQSSGSATNR RQS[166.9984]3        | 0.241  | 0.017    | 0.003    | 1         | 24.73 | 20    | 117 | 6   | 1538 | 1.65 |       |
| 1252.546 | 6  | Q7Z460 | R.SQEDLNEPK S[166.9984]QEI         | 2      | -0.943   | 0.025    | 0.001     | 0     | 21.12 | 18  | 163 | 7    | 1538 | 0.92  |
| 1657.718 | 11 | Q7Z460 | K.NSSNTSVGSP NSSNTSVGSP[16         | 2      | 1.837    | 4.90E-05 | 0.002     | 0     | 47.9  | 17  | 204 | 8    | 1538 | 0.89  |
| 1827.798 | 14 | Q7Z460 | R.RQSSGSATNR RQSSGSAT[181]3        | 0.349  | 0.013    | 0.003    | 1         | 25.83 | 20    | 166 | 6   | 1538 | 1.65 |       |
| 1907.764 | 13 | Q7Z460 | R.RQSSGSATNR RQS[166.9984]2        | 0.691  | 5.90E-04 | 0.001    | 1         | 38.45 | 19    | 188 | 7   | 1538 | 0.73 |       |
| 1907.764 | 11 | Q7Z460 | R.RQSSGSATNR RQS[166.9984]2        | 0.745  | 5.20E-04 | 0.001    | 1         | 38.98 | 19    | 204 | 8   | 1538 | 0.73 |       |
| 1671.697 | 6  | Q7Z460 | R.QSSGSATNR QSSGS[166.99]2         | -0.105 | 0.004    | 0.002    | 0         | 29.53 | 18    | 158 | 6   | 1538 | 1.5  |       |
| 1265.614 | 7  | Q7Z4H7 | R.TPENLITEIR S T[181.014]PEN       | 2      | 2.159    | 1.90E-05 | 0.002     | 0     | 52.82 | 18  | 53  | 4    | 955  | 1.28  |
| 1410.651 | 9  | Q7Z4H7 | R.AVLSDSPQLSI AVLSDS[166.99]2      | 0.248  | 0.002    | 0.002    | 0         | 33.01 | 18    | 75  | 4   | 955  | 1.28 |       |
| 1203.613 | 6  | Q7Z456 | K.KIPEPSPVTR F KIPEPSPVTR[181]2    | -0.585 | 0.012    | 0.001    | 1         | 24.68 | 18    | 51  | 2   | 1674 | 1.09 |       |
| 2502.099 | 13 | Q7Z456 | R.KLSSSDAPAQ KLS[166.9984]5        | 1.291  | 1.60E-05 | 0.003    | 1         | 54.91 | 19    | 62  | 2   | 1674 | 1.23 |       |
| 2502.099 | 14 | Q7Z456 | R.KLSSSDAPAQ KLS[166.9984]3        | 1.127  | 2.50E-04 | 0.003    | 1         | 42.94 | 19    | 42  | 3   | 1674 | 1.23 |       |
| 2502.099 | 13 | Q7Z456 | R.KLSSSDAPAQ KLS[166.9984]3        | 1.317  | 1.50E-04 | 0.003    | 1         | 45.05 | 19    | 110 | 3   | 1674 | 1.23 |       |
| 1203.613 | 7  | Q7Z456 | K.KIPEPSPVTR F KIPEPSPVTR[166.99]2 | -0.889 | 0.025    | 0.001    | 1         | 21.65 | 18    | 56  | 5   | 1674 | 1.09 |       |
| 1594.693 | 11 | Q7Z4V5 | K.ADSGAKPEF ADS[166.9984]3         | 1.291  | 6.40E-04 | 0.002    | 0         | 37.76 | 18    | 57  | 7   | 671  | 1.09 |       |
| 1358.511 | 7  | Q7Z4V5 | R.ARGDSEALDE ARGDS[166.99]2        | -0.557 | 0.011    | 0.002    | 1         | 20.98 | 14    | 57  | 7   | 671  | 1.38 |       |
| 1806.777 | 10 | Q7Z4V5 | R.EGPDLDPRGS EGPDLDRPGS[1]3        | 0.472  | 0.012    | 5.00E-04 | 1         | 25.07 | 18    | 68  | 4   | 671  | 0.26 |       |
| 1368.55  | 8  | Q7Z569 | K.ECINAAPDSP EC[160.0307]I         | 2      | -0.931   | 0.025    | 0.003     | 0     | 18.24 | 15  | 18  | 1    | 592  | 2.27  |
| 1368.55  | 7  | Q7Z569 | K.ECINAAPDSP EC[160.0307]I         | 2      | 0.208    | 0.002    | 0.003     | 0     | 29.66 | 15  | 50  | 1    | 592  | 2.27  |
| 1285.604 | 7  | Q7Z589 | R.TNSSSSPVVL TNS[166.9984]2        | -1.17  | 0.043    | 0.001    | 0         | 18.88 | 18    | 19  | 1   | 1322 | 0.99 |       |
| 1499.654 | 10 | Q7Z5K2 | K.RPESPEISPIK RPES[166.9984]2      | -0.594 | 0.012    | 0.002    | 0         | 24.61 | 18    | 25  | 1   | 1190 | 1.59 |       |
| 1419.688 | 6  | Q7Z5K2 | K.RPESPEISPIK RPES[166.9984]2      | -0.896 | 0.027    | 0.002    | 0         | 21.59 | 18    | 22  | 1   | 1190 | 1.06 |       |
| 1683.81  | 8  | Q7Z5L9 | K.RKPSPEPEGEV RKPSP[166.9984]2     | 0.998  | 3.00E-04 | 0.001    | 1         | 40.53 | 18    | 81  | 5   | 587  | 0.8  |       |
| 1527.709 | 14 | Q7Z5L9 | R.KPSPEPEGEV KPS[166.9984]2        | -0.266 | 0.005    | 0.003    | 0         | 28.89 | 19    | 81  | 5   | 587  | 2.2  |       |
| 1582.631 | 8  | Q7Z5L9 | R.NSNSPPSPSSI NSNSPPS[166.9]2      | 0.907  | 3.70E-04 | 4.00E-04 | 0         | 38.62 | 17    | 81  | 5   | 587  | 0.24 |       |
| 1818.699 | 10 | Q7Z5L9 | R.RNSNSPPSPSSI RNS[166.9984]2      | -1.041 | 0.031    | 7.00E-04 | 1         | 18.14 | 16    | 81  | 5   | 587  | 0.41 |       |
| 1790.818 | 17 | Q7Z5L9 | K.RPASVSSAA RPA5VSS[166.9]3        | 0.486  | 0.01     | 0.002    | 0         | 25.18 | 18    | 81  | 5   | 587  | 1.13 |       |
| 1790.818 | 12 | Q7Z5L9 | K.RPASVSSAA RPA5VSS[166.99]3       | 0.605  | 0.008    | 0.002    | 0         | 26.41 | 18    | 100 | 5</ |      |      |       |

|          |    |               |                              |   |        |          |           |   |       |    |     |    |      |       |
|----------|----|---------------|------------------------------|---|--------|----------|-----------|---|-------|----|-----|----|------|-------|
| 1846.833 | 10 | Q7Z6Z7        | R.AGSSTPGDAF AGSS[166.9984   | 2 | -0.335 | 0.007    | 3.00E-04  | 0 | 27.18 | 18 | 167 | 11 | 4374 | 0.16  |
| 1551.552 | 8  | Q7Z6Z7        | R.DLSMSEEDQJ DLS[166.9984]   | 2 | -0.297 | 0.007    | 0.003     | 0 | 24.56 | 15 | 167 | 11 | 4374 | 1.69  |
| 3367.427 | 16 | Q7Z6Z7        | R.REESPMVDV REES[166.9984    | 3 | 0.378  | 0.014    | 0.003     | 1 | 24.14 | 18 | 167 | 11 | 4374 | 0.99  |
| 1669.732 | 7  | Q7Z6Z7        | K.GNDTPLALES GNDT[181.014    | 2 | -0.677 | 0.014    | 0.004     | 0 | 24.76 | 19 | 167 | 11 | 4374 | 2.08  |
| 1227.471 | 8  | Q7Z6Z7        | R.AESPEEVACR AES[166.9984]   | 2 | -1.046 | 0.033    | -4.00E-04 | 0 | 19.07 | 17 | 170 | 11 | 4374 | -0.34 |
| 3447.393 | 18 | Q7Z6Z7        | R.REESPMVDV REESPMVDVQF      | 3 | -0.086 | 0.036    | 0.004     | 1 | 19.47 | 18 | 106 | 9  | 4374 | 1.1   |
| 973.435  | 7  | Q8B5Q0        | K.SSISISGR.D S[166.9984]SIS  | 2 | -0.96  | 0.03     | 0.001     | 0 | 21.98 | 19 | 22  | 2  | 1253 | 1.24  |
| 1583.685 | 7  | Q8B5Q0        | K.SHDNVYSLG S[166.9984]HD    | 3 | 0.689  | 0.007    | 0.002     | 0 | 27.23 | 18 | 32  | 3  | 1253 | 1.1   |
| 1357.625 | 7  | Q8B5Q0        | R.LSTGTTVEDV LS[166.9984]TC  | 2 | 0.18   | 0.002    | 1.00E-04  | 0 | 32.34 | 18 | 60  | 5  | 1253 | 0.09  |
| 1583.685 | 7  | Q8B5Q0        | K.SHDNVYSLG SHDNVY[243.0     | 3 | 0.986  | 0.004    | 0.002     | 0 | 30.18 | 18 | 30  | 3  | 1253 | 1.1   |
| 1099.449 | 6  | Q8B5Q0        | R.SGAASMPSSF SGAASMPSS[1     | 2 | 0.671  | 6.60E-04 | 0.001     | 0 | 36.25 | 17 | 60  | 5  | 1253 | 1.25  |
| 1290.645 | 7  | Q8B7B9        | R.STSPIGSPVVI STS[166.9984]  | 2 | -0.313 | 0.006    | 0.002     | 0 | 27.42 | 18 | 27  | 1  | 770  | 1.13  |
| 1645.778 | 7  | Q8B7G7        | K.QSEENNNLQZ QSEENNNLQSQ     | 2 | 1.082  | 2.40E-04 | 0.002     | 0 | 41.37 | 18 | 41  | 3  | 708  | 1.16  |
| 1803.827 | 12 | Q8B6U6        | K.SPVPREPVDNL S[166.9984]PVI | 2 | -1.102 | 0.04     | 0.002     | 1 | 20.53 | 19 | 37  | 2  | 439  | 1.02  |
| 1282.583 | 10 | Q8B6U4        | R.NPEAALSPTFI NPEAALS[166.5  | 2 | 0.155  | 0.002    | 0.002     | 0 | 32.1  | 18 | 32  | 2  | 580  | 1.24  |
| 2351.015 | 12 | Q8B6U4        | K.DHTTSPQELAL DHT[181.014]P  | 3 | 0.139  | 0.025    | 0.003     | 0 | 21.75 | 18 | 29  | 2  | 580  | 1.1   |
| 1954.727 | 7  | Q8B6U0        | K.MSGGSTMSS MSGGS[166.99     | 2 | 0.278  | 0.002    | 0.004     | 0 | 31.33 | 16 | 31  | 1  | 411  | 1.87  |
| 1954.727 | 6  | Q8B6U0        | K.MSGGSTMSS MSGGS[181.0      | 2 | -0.992 | 0.029    | 0.004     | 0 | 18.63 | 16 | 19  | 1  | 411  | 1.87  |
| 1954.727 | 12 | Q8B6U0        | K.MSGGSTMSS MS[166.9984]C    | 2 | -0.341 | 0.007    | 0.004     | 0 | 25.12 | 16 | 25  | 2  | 411  | 1.87  |
| 1419.663 | 13 | Q8B6U0        | R.LPGSGAVQAJ LPGSGAVQAAS     | 2 | -0.942 | 0.03     | 0.003     | 0 | 22.11 | 19 | 22  | 1  | 279  | 2.07  |
| 2259.941 | 11 | Q8B6U0        | R.SPEQLCAPAE S[166.9984]PE   | 2 | 0.066  | 0.003    | 0.001     | 0 | 32.19 | 19 | 32  | 2  | 394  | 0.5   |
| 1228.546 | 8  | Q8B6E4        | K.LSSQISAGEEK LSSQS[166.99   | 2 | 0.017  | 0.003    | 0.002     | 0 | 29.72 | 17 | 125 | 6  | 582  | 1.34  |
| 1895.791 | 12 | Q8B6E4        | K.SQEPDPDQK SQEPDPDQKVS      | 2 | -0.838 | 0.022    | 0.005     | 1 | 22.17 | 18 | 130 | 4  | 582  | 2.63  |
| 1793.767 | 10 | Q8B6E4        | K.QGEDNSTAQ QGEDNSTAQD       | 2 | 2.159  | 4.90E-06 | 3.00E-04  | 0 | 58.6  | 18 | 58  | 6  | 582  | 0.14  |
| 1183.514 | 6  | Q8B6E4        | K.WNSVSPASAI WNSVSPAS[16     | 2 | -0.431 | 0.008    | 0.002     | 0 | 26.24 | 18 | 125 | 6  | 582  | 1.94  |
| 1183.514 | 6  | Q8B6E4        | K.WNSVSPASAI WNSVSPAS[16     | 2 | -0.591 | 0.012    | 0.002     | 0 | 24.62 | 18 | 109 | 7  | 582  | 1.94  |
| 1439.703 | 15 | Q8B6E4        | K.TISTSDPAEVL TIS[166.9984]  | 2 | -0.746 | 0.018    | 0.003     | 0 | 24.07 | 19 | 85  | 5  | 582  | 2.08  |
| 2345.987 | 10 | Q8B6P2        | K.AAGDPTVIEN AAGDPTVIENS     | 2 | 2.119  | 5.50E-07 | 0.001     | 0 | 67.91 | 18 | 98  | 3  | 1357 | 0.51  |
| 1990.85  | 18 | Q8B6P2        | K.EIQNGNLHES EIQNGNLHES      | 2 | 1.311  | 1.60E-04 | 0.002     | 0 | 43.66 | 18 | 95  | 3  | 1357 | 0.82  |
| 1143.468 | 9  | Q8B6U0        | R.SVSVDSGEOR S[166.9984]VS   | 2 | -1.103 | 0.037    | 0.002     | 0 | 18.52 | 17 | 22  | 3  | 1499 | 1.43  |
| 1921.818 | 15 | Q8B6U0        | R.GPGDLMGPC GPGDLMGPOG       | 2 | -0.969 | 0.032    | 0.003     | 0 | 20.86 | 18 | 22  | 3  | 1499 | 1.38  |
| 2223.046 | 13 | Q8B6U0        | K.SPTLSQVHSPJ S[166.9984]PTL | 3 | -0.179 | 0.049    | 0.004     | 0 | 18.56 | 18 | 20  | 3  | 1499 | 1.67  |
| 1187.546 | 6  | Q8B6U0        | R.EAPGSPPLSP EAPGS[166.99    | 2 | -0.995 | 0.029    | 0.002     | 0 | 23.58 | 21 | 45  | 6  | 1499 | 1.34  |
| 1325.61  | 5  | Q8B6U0        | K.ANIQSPSNSSI ANIQS[166.99   | 2 | -0.82  | 0.022    | 0.002     | 0 | 23.33 | 19 | 45  | 6  | 1499 | 1.4   |
| 1047.451 | 7  | Q8B6U1        | R.TFSDGLATRA TRS[166.9984]   | 2 | -0.363 | 0.007    | 5.00E-04  | 0 | 27.92 | 19 | 29  | 3  | 1377 | 0.51  |
| 1837.824 | 13 | Q8B6U1        | R.TRSPSPTLGEI TRS[166.9984]  | 3 | -0.078 | 0.04     | 0.002     | 1 | 20.54 | 19 | 29  | 3  | 1377 | 1.09  |
| 1837.824 | 11 | Q8B6U1        | R.TRSPSPTLGEI TRS[166.9984]  | 3 | 0.064  | 0.029    | 0.002     | 1 | 21.99 | 19 | 27  | 3  | 1377 | 1.09  |
| 1837.824 | 11 | Q8B6U1        | R.TRSPSPTLGEI TRS[166.9984]  | 3 | -0.104 | 0.042    | 0.002     | 1 | 20.32 | 19 | 32  | 4  | 1377 | 1.09  |
| 1104.509 | 5  | Q8B6U1        | R.TLQPPESPR.L TLQPPES[166.9  | 2 | -0.909 | 0.023    | 1.00E-04  | 0 | 21.49 | 18 | 32  | 4  | 1377 | 0.09  |
| 1030.406 | 5  | Q8B6U1        | R.LWESMER.S LWES[166.9984]   | 2 | -0.335 | 0.007    | 0.001     | 0 | 23.18 | 14 | 48  | 4  | 1377 | 1.05  |
| 1475.605 | 8  | Q8B6V8        | R.SSTDFSELEQ SS[166.9984]TT  | 2 | 0.343  | 0.001    | 0.002     | 0 | 32.98 | 17 | 93  | 7  | 1076 | 1.24  |
| 1526.627 | 6  | Q8B6V8        | K.SHSAPSEVGH S[166.9984]J    | 2 | -0.513 | 0.011    | -0.002    | 0 | 23.42 | 16 | 93  | 7  | 1076 | -1.13 |
| 1694.762 | 10 | Q8B6V8        | K.NNDLQDNLYL NNDLQDNLYLSE    | 2 | 1.594  | 7.70E-05 | 0.002     | 0 | 47.49 | 19 | 56  | 5  | 1076 | 1.13  |
| 1475.605 | 10 | Q8B6V8        | R.SSTDFSELEQ S[166.9984]TT   | 2 | 0.096  | 0.002    | 0.002     | 0 | 30.5  | 17 | 114 | 6  | 1076 | 1.24  |
| 1898.853 | 13 | Q8B6V8        | K.AQTGPLRSLI AQTGPLRSL[166   | 2 | -0.275 | 0.006    | 0.005     | 1 | 26.8  | 17 | 27  | 1  | 176  | 2.78  |
| 2464.937 | 13 | Q8B6V9        | R.GPSQEEEDNH GPSQEEEDNHS     | 3 | 1.291  | 0.001    | 0.004     | 1 | 33.22 | 16 | 159 | 8  | 953  | 1.59  |
| 2059.707 | 12 | Q8B6V9        | R.GPTSSPCEEI GPTSS[166.99    | 2 | 2.159  | 6.90E-07 | 0.002     | 0 | 62.61 | 13 | 159 | 8  | 953  | 0.82  |
| 981.477  | 8  | Q8B6V9        | K.LGVSVSPSA LGVSVS[166.99    | 2 | 2.159  | 1.80E-05 | 3.00E-04  | 0 | 54.51 | 20 | 159 | 8  | 953  | 0.32  |
| 2745.112 | 19 | Q8B6V9        | R.DSGSDQDLX DSGSDQDLXG       | 3 | 1.291  | 8.70E-04 | 0.003     | 1 | 36.7  | 19 | 159 | 8  | 953  | 1.02  |
| 1372.526 | 10 | Q8B6V9        | R.ASDLEESA AS[166.9984]D     | 2 | 0.286  | 0.002    | 0.002     | 0 | 30.41 | 15 | 159 | 8  | 953  | 1.56  |
| 1516.664 | 19 | Q8B6V9        | R.TSDLRDEASS TSDLRDEASS[1    | 3 | 0.199  | 0.02     | 7.00E-04  | 1 | 22.33 | 18 | 137 | 9  | 953  | 0.47  |
| 2631.999 | 12 | Q8B6V9        | R.GPTSSPCEEI GPTSS[166.99    | 2 | -0.036 | 0.034    | 0.003     | 1 | 16.99 | 15 | 134 | 9  | 953  | 1.09  |
| 2059.707 | 11 | Q8B6V9        | R.GPTSSPCEEI GPTSS[166.99    | 2 | 2.197  | 7.90E-06 | 0.002     | 0 | 51.99 | 13 | 134 | 9  | 953  | 0.82  |
| 1516.664 | 13 | Q8B6V9        | R.TSDLRDEASS TSDLRDEASSVT    | 3 | 0.547  | 0.009    | 7.00E-04  | 1 | 25.82 | 18 | 134 | 9  | 953  | 0.47  |
| 1586.633 | 10 | Q8B6V9        | K.SQDODSEVNI S[166.9984]OD   | 2 | 2.127  | 8.70E-06 | 0.002     | 0 | 54.41 | 16 | 211 | 11 | 953  | 1.02  |
| 2654.089 | 7  | Q8B6V2        | R.GQPLTEGSE GQPLTEGSEDI      | 3 | 0.57   | 0.009    | 0.003     | 0 | 24.05 | 16 | 24  | 1  | 466  | 1.14  |
| 2654.089 | 10 | Q8B6V2        | R.GQPLTEGSE GQPLTEGSEDI      | 3 | 0.409  | 0.014    | 0.003     | 0 | 22.43 | 16 | 22  | 2  | 466  | 1.14  |
| 900.39   | 4  | Q8B6W4        | K.SLCEALK.H S[166.9984]LC    | 2 | -0.738 | 0.018    | -0.003    | 0 | 22.15 | 17 | 22  | 3  | 1093 | -2.91 |
| 1572.64  | 7  | Q8B6V5        | R.QESCLGNSEP QES[166.9984]   | 2 | -0.428 | 0.008    | 0.001     | 0 | 25.25 | 17 | 25  | 2  | 976  | 0.9   |
| 2039.794 | 8  | Q8B6V9        | R.SQSTTFNPDQ SQS[166.9984]   | 2 | 0.087  | 0.003    | 0.001     | 0 | 29.42 | 16 | 29  | 1  | 1011 | 0.5   |
| 2039.794 | 12 | Q8B6V9        | R.SQSTTFNPDQ S[166.9984]QS   | 2 | 2.274  | 3.40E-07 | 0.001     | 0 | 68.64 | 16 | 69  | 1  | 1011 | 0.5   |
| 2431.98  | 8  | Q8B6W0        | R.SWDSSSPVDF SWDSS[166.99    | 3 | 0.085  | 0.024    | 0.002     | 0 | 22.17 | 19 | 93  | 9  | 502  | 0.87  |
| 2352.014 | 8  | Q8B6W0        | R.SWDSSSPVDF SWDSSSPVDRP     | 3 | 1.197  | 0.002    | 0.002     | 0 | 33.29 | 19 | 93  | 9  | 502  | 0.91  |
| 1243.656 | 6  | Q8B6W0        | R.LPLVPESPRR.L LPLVPES[166.9 | 3 | 0.305  | 0.017    | 0.001     | 1 | 19.37 | 14 | 93  | 9  | 502  | 0.87  |
| 2352.014 | 17 | Q8B6W0        | R.SWDSSSPVDF SWDSSSPVDRP     | 3 | -0.077 | 0.038    | 0.002     | 0 | 20.58 | 19 | 54  | 5  | 502  | 0.91  |
| 1661.669 | 9  | Q8B6W0        | R.SODATTFSPG SODATTF[166.5   | 2 | 2.127  | 5.60E-06 | 0.003     | 0 | 56.67 | 17 | 60  | 8  | 502  | 1.97  |
| 1880.846 | 8  | Q8B6W0        | R.SMGTGDTPG SMGTGDTPLG       | 2 | -1.135 | 0.039    | 0.003     | 0 | 19.18 | 18 | 56  | 9  | 502  | 1.61  |
| 1998.673 | 7  | Q8B6W0        | K.VENMSSNQD VENMSSNQDG       | 2 | 0.169  | 0.002    | 9.00E-04  | 0 | 29.24 | 15 | 29  | 1  | 208  | 0.46  |
| 1477.657 | 8  | Q8B6W7        | R.SRSFTLDESL SRS[166.9984]   | 2 | 2.159  | 1.80E-05 | 0.002     | 1 | 53.46 | 19 | 53  | 4  | 435  | 1.42  |
| 1234.524 | 7  | Q8B6W7        | R.SFTLDESLK S[166.9984]FTL   | 2 | -0.093 | 0.004    | 0.001     | 0 | 31.62 | 20 | 69  | 4  | 435  | 1.15  |
| 1166.535 | 7  | Q8B6W7        | R.APSPVPEHPR APS[166.9984]   | 2 | -1.126 | 0.046    | 0.002     | 0 | 21.27 | 20 | 50  | 4  | 435  | 1.73  |
| 2054.944 | 16 | Q8B6X29       | R.GPALTPIRDEI GPALTPIRDEEV   | 3 | 0.947  | 0.003    | 0.003     | 1 | 30.79 | 19 | 121 | 6  | 649  | 1.53  |
| 1997.87  | 11 | Q8B6X29       | R.SVDALDILT S[166.9984]VD    | 2 | 1.329  | 1.60E-04 | 9.00E-04  | 0 | 42.84 | 17 | 111 | 5  | 649  | 0.43  |
| 2225.008 | 15 | Q8B6X29       | R.ARSVDALDIL ARS[166.9984]   | 2 | 2.159  | 7.20E-08 | 0.002     | 1 | 77.45 | 19 | 121 | 6  | 649  | 0.92  |
| 1564.591 | 6  | Q8B6X29       | R.SRDLDYQDI S[166.9984]RDI   | 2 | -1.172 | 0.043    | 0.002     | 1 | 15.83 | 15 | 111 | 8  | 649  | 1.58  |
| 1755.704 | 7  | Q8B6X29       | R.AMSEVLSHE AMSEVTS[166.1    | 2 | 1.82   | 4.60E-05 | 0.002     | 0 | 47.74 | 17 | 136 | 6  | 649  | 0.98  |
| 2134.911 | 13 | Q8B6X29       | R.GPALTPIRDEI GPALT[181.014  | 3 | -0.184 | 0.045    | 0.003     | 1 | 21.91 | 19 | 147 | 8  | 649  | 1.32  |
| 753.365  | 4  | Q8B6X29,Q8Z58 | K.NLALSR.E NLALS[166.998     | 2 | -1.063 | 0.036    | 0.001     | 0 | 19.59 | 20 | 135 | 20 | 135  | 1.67  |
| 2510.02  | 11 | Q8B6X3        | R.AROEGGADA AROEGGADAS       | 3 | -0.062 | 0.042    | 0.005     | 1 | 18.73 | 17 | 19  | 1  | 443  | 1.87  |
| 2990.283 | 19 | Q8B6X5        | R.NLITANDPSQI NLITANDPSQEY   | 3 | 0.457  | 0.011    | 0.001     | 0 | 25.93 | 19 | 26  | 1  | 450  | 0.33  |
| 2144.006 | 21 | Q8B6Y1        | K.LQVYEGGGQ LQVYEGGGQPP      | 3 | -0.142 | 0.041    | 0.004     | 0 | 19.9  | 19 | 34  | 3  | 864  | 1.64  |
| 1832.854 | 8  | Q8B6Y1        | R.RGSLPDTQPS RGS[166.9984]   | 2 | -0.8   | 0.02     | 0.001     | 1 | 22.54 | 18 | 23  | 1  | 864  | 0.75  |
| 2350.048 | 16 | Q8B6Y4        | R.RPPSPDVILS RPPS[166.9984   | 3 | 1.291  | 7.20E-04 | 0.005     | 0 | 36.93 | 18 | 37  | 2  | 633  | 2.27  |
| 2869.082 | 10 | Q8B6Y5        | R.CSPSGDSEGC C[160.0307]SP   | 3 | 0.856  | 0.005    | 0.005     | 0 | 27.9  | 17 | 84  | 3  | 1402 | 1.85  |
| 1210.518 | 11 |               |                              |   |        |          |           |   |       |    |     |    |      |       |

|          |    |        |                                  |        |          |           |   |       |    |     |    |      |       |
|----------|----|--------|----------------------------------|--------|----------|-----------|---|-------|----|-----|----|------|-------|
| 2547.035 | 15 | Q8IVH2 | R.RDSSSHEETPR RDS[166.9984]: 4   | -0.027 | 0.03     | 0.004     | 1 | 20.3  | 18 | 20  | 3  | 680  | 1.4   |
| 2547.035 | 10 | Q8IVH2 | R.RDSSSHEETPR RDS[166.9984]      | 0.117  | 0.019    | 0.004     | 1 | 22.41 | 18 | 29  | 3  | 680  | 1.4   |
| 1733.705 | 9  | Q8IVL1 | K.GISSDNESVA: GISS[166.9984] 2   | -0.407 | 0.008    | 0.001     | 0 | 25.47 | 17 | 25  | 7  | 2488 | 0.71  |
| 1579.736 | 10 | Q8IVT2 | R.ALSSDLSIPAI ALS[166.9984]: 2   | 2.119  | 1.40E-07 | 0.002     | 0 | 74.6  | 19 | 188 | 9  | 679  | 1.58  |
| 1114.478 | 6  | Q8IVT2 | K.SOSSOLLER.E SOS[166.9984]: 2   | -0.135 | 0.004    | 6.00E-04  | 0 | 30.2  | 19 | 188 | 9  | 679  | 0.56  |
| 1579.736 | 10 | Q8IVT2 | R.ALSSDLSIPAI ALS[166.9984] 2    | -0.468 | 0.01     | 0.002     | 0 | 25.87 | 18 | 172 | 7  | 679  | 1.45  |
| 2444.04  | 11 | Q8IVT2 | R.NALFPEVFSPI NALFPEVFS[164] 2   | 2.159  | 8.40E-06 | 0.003     | 0 | 57    | 19 | 172 | 7  | 679  | 1.12  |
| 1735.837 | 6  | Q8IVT2 | R.RALSSDLSIP RALS[166.9984] 2    | 1.55   | 9.50E-05 | 2.00E-04  | 1 | 45.05 | 17 | 188 | 9  | 679  | 0.11  |
| 1114.478 | 6  | Q8IVT2 | K.SOSSOLLER.E S[166.9984]OS: 2   | -0.456 | 0.009    | 0.001     | 0 | 26.99 | 19 | 172 | 7  | 679  | 0.91  |
| 1818.802 | 9  | Q8IVT2 | K.SSTVATLQGT SS[166.9984]T: 2    | -1.075 | 0.034    | -7.00E-04 | 0 | 18.78 | 17 | 141 | 9  | 679  | -0.39 |
| 2444.04  | 13 | Q8IVT2 | R.NALFPEVFSPI NALFPEVFSPT: 3     | -0.028 | 0.034    | 0.002     | 0 | 21.07 | 19 | 141 | 9  | 679  | 0.91  |
| 2444.04  | 11 | Q8IVT2 | R.NALFPEVFSPI NALFPEVFSPTP: 3    | -0.093 | 0.039    | -9.00E-04 | 0 | 20.42 | 19 | 250 | 10 | 679  | -0.36 |
| 950.507  | 7  | Q8IVT2 | K.LSUTAPR.R LS[166.9984]U: 2     | -0.621 | 0.012    | 9.00E-04  | 0 | 26.32 | 20 | 166 | 9  | 679  | 0.91  |
| 2135.002 | 22 | Q8IWA0 | K.VQDTSNTGLC VQDTS[166.9984] 3   | 1.393  | 2.40E-04 | 0.003     | 0 | 41.59 | 18 | 42  | 2  | 830  | 1.49  |
| 2023.832 | 7  | Q8IWI9 | K.GFDNPEENSS GFDNPEENSS[16] 2    | -0.704 | 0.015    | 0.003     | 0 | 22.51 | 17 | 30  | 6  | 3026 | 1.54  |
| 1476.698 | 10 | Q8IWI9 | K.QLAEPASEPD QLAEPAS[166.5] 2    | -0.25  | 0.005    | 0.002     | 0 | 29.03 | 19 | 43  | 6  | 3026 | 1.47  |
| 2023.832 | 6  | Q8IWI9 | K.GFDNPEENSS GFDNPEENSS[1] 2     | 0.704  | 5.70E-04 | 0.003     | 0 | 36.57 | 17 | 53  | 5  | 3026 | 1.54  |
| 1588.748 | 13 | Q8IWI9 | K.VVNNANQNAS VVNNANQNAS[1] 2     | -0.649 | 0.016    | -0.002    | 0 | 24.04 | 18 | 50  | 7  | 3026 | -1    |
| 2857.124 | 26 | Q8IWS0 | K.TAHNSEADLE TAHNS[166.9984] 3   | 0.034  | 0.031    | 0.002     | 0 | 19.69 | 17 | 20  | 1  | 365  | 0.61  |
| 1252.604 | 9  | Q8IWT6 | K.SRIEQGIVDR.S[166.9984]RIE 2    | -1.093 | 0.035    | 0.001     | 1 | 20.61 | 19 | 21  | 3  | 810  | 1.1   |
| 2041.744 | 7  | Q8IWW6 | K.TSFQEQSCD TSFQEQSC[16] 2       | 0.191  | 0.002    | 0.002     | 0 | 29.46 | 15 | 29  | 2  | 846  | 0.84  |
| 2556.153 | 18 | Q8IWW6 | R.ATTPPNQGR IATT[181.014]PI: 3   | 0.184  | 0.023    | 0.003     | 0 | 22.21 | 18 | 25  | 3  | 846  | 1.3   |
| 1747.783 | 13 | Q8IWX8 | R.ARSPDLGPE ARS[166.9984]: 3     | -0.043 | 0.038    | 0.001     | 1 | 19.89 | 18 | 20  | 2  | 852  | 0.7   |
| 1650.762 | 6  | Q8IWX8 | R.DVDASPSPLS DVDAS[166.9984] 2   | 0.089  | 0.003    | 0.002     | 0 | 32.44 | 19 | 50  | 2  | 645  | 1.44  |
| 1650.762 | 9  | Q8IWX8 | R.DVDASPSPLS DVDASPS[166.5] 2    | 2      | 2.80E-05 | 0.004     | 0 | 51.55 | 19 | 52  | 2  | 645  | 2.11  |
| 1176.537 | 7  | Q8IX01 | R.KMSFDIIDK.S KMS[166.9984] 2    | -0.875 | 0.023    | 0.001     | 1 | 20.78 | 17 | 21  | 3  | 1082 | 1.09  |
| 1328.588 | 8  | Q8IX90 | R.SPQLSDFLEI S[166.9984]PQ: 2    | 0.582  | 8.40E-04 | 0.002     | 0 | 36.37 | 18 | 36  | 1  | 412  | 1.5   |
| 2769.146 | 18 | Q8IX90 | K.NSVHEQEAIN NSVHEQEAIN[3] 3     | -0.046 | 0.039    | 0.001     | 0 | 18.9  | 17 | 36  | 2  | 412  | 0.52  |
| 2787.17  | 8  | Q8IXK0 | K.LPQQDHTTTT LPQQDHTTTT[1] 3     | 1.263  | 0.002    | 0.002     | 0 | 32.95 | 18 | 33  | 1  | 858  | 0.73  |
| 2787.17  | 9  | Q8IXK0 | K.LPQQDHTTTT LPQQDHTTTT[2] 3     | 1.127  | 7.40E-04 | 0.002     | 0 | 36.9  | 18 | 37  | 2  | 858  | 0.73  |
| 2787.17  | 9  | Q8IXK0 | K.LPQQDHTTTT LPQQDHTTTT[3] 3     | 1.205  | 3.70E-05 | 0.002     | 0 | 49.86 | 18 | 50  | 1  | 858  | 0.73  |
| 2787.17  | 12 | Q8IXK0 | K.LPQQDHTTTT LPQQDHTTTT[181.1] 3 | 1.101  | 2.10E-04 | 0.002     | 0 | 42.44 | 18 | 42  | 1  | 858  | 0.73  |
| 1809.867 | 10 | Q8IXM2 | K.VYEDSGIPLPA VYEDSGIPLPAE 3     | 1.253  | 0.002    | 9.00E-04  | 1 | 32.85 | 18 | 39  | 3  | 172  | 0.5   |
| 1681.772 | 9  | Q8IXM2 | K.VYEDSGIPLPA VYEDSGIPLPAE 2     | -1.066 | 0.035    | 0.002     | 0 | 20.89 | 19 | 27  | 2  | 172  | 1.41  |
| 1541.655 | 10 | Q8IXQ3 | K.IDAGTMAEPS IDAGTMAEPSA 2       | 2.159  | 9.80E-06 | 0.002     | 0 | 55.77 | 18 | 56  | 1  | 194  | 0.98  |
| 2093.791 | 11 | Q8IXT5 | R.SPQEDFRCP SPQEDFRCP[16] 3      | 0.152  | 0.022    | 0.002     | 1 | 20.88 | 17 | 34  | 6  | 1001 | 0.99  |
| 1855.78  | 8  | Q8IXT5 | R.FPPEDFRHSPI FPPDFRHS[16] 3     | 0.137  | 0.022    | 0.002     | 1 | 21.7  | 18 | 21  | 6  | 1001 | 1.06  |
| 1389.652 | 7  | Q8IXZ2 | K.DHASQLSPVL DHASQLS[166.5] 2    | -1.099 | 0.043    | 6.00E-04  | 0 | 19.56 | 18 | 20  | 2  | 948  | 0.43  |
| 2541.012 | 9  | Q8IY57 | K.SPASSAASAI S[166.9984]PP: 3    | -0.089 | 0.045    | 0.004     | 0 | 18.43 | 17 | 18  | 1  | 180  | 1.65  |
| 1903.78  | 8  | Q8IY81 | K.GTEASSGTEA GTEASS[166.9984] 2  | 2.119  | 4.60E-06 | 7.00E-04  | 0 | 58.28 | 17 | 94  | 3  | 847  | 0.36  |
| 1826.773 | 8  | Q8IY81 | K.SDDDGFEIVPI S[166.9984]DD 2    | 2.159  | 4.20E-07 | 0.003     | 0 | 69.16 | 18 | 119 | 4  | 847  | 1.66  |
| 1903.78  | 12 | Q8IY81 | K.GTEASSGTEA GTEAS[166.9984] 2   | 1.725  | 6.50E-05 | 7.00E-04  | 0 | 46.78 | 17 | 65  | 2  | 847  | 0.36  |
| 1093.527 | 5  | Q8IY81 | R.DLIDNSFN.R Y DLIDNSFN.R 2      | -0.853 | 0.023    | 0.001     | 0 | 22    | 18 | 92  | 3  | 847  | 1.14  |
| 1476.692 | 6  | Q8IY81 | K.QQLPQTPPSC QQLPQT[181.0] 2     | -0.919 | 0.025    | 0.003     | 0 | 22.34 | 19 | 92  | 4  | 847  | 1.74  |
| 1249.619 | 5  | Q8IY92 | R.SPGLLDTTPIR S[166.9984]PG: 2   | -0.582 | 0.011    | 0.002     | 0 | 25.73 | 19 | 26  | 1  | 1834 | 1.53  |
| 1159.454 | 7  | Q8IYB3 | K.AASPSPQSVR AAS[166.9984] 2     | 0.568  | 9.10E-04 | 0.002     | 0 | 35.23 | 17 | 246 | 27 | 904  | 2.14  |
| 1188.485 | 5  | Q8IYB3 | R.RYSPSPPP.R RYS[166.9984]: 2    | -0.587 | 0.013    | 0.001     | 1 | 21.68 | 15 | 246 | 27 | 904  | 1.19  |
| 1096.53  | 3  | Q8IYB3 | R.RYSPPIQR.R RYS[166.9984]: 2    | -1.13  | 0.042    | 0.001     | 1 | 19.25 | 18 | 273 | 26 | 904  | 1.1   |
| 1944.796 | 13 | Q8IYB3 | K.KETESAEDN KETES[166.9984] 3    | 1.291  | 0.002    | 0.002     | 1 | 33.41 | 18 | 246 | 27 | 904  | 0.87  |
| 1433.692 | 7  | Q8IYB3 | K.EKTEPEPEPSV EKT[181.014]PI: 2  | -0.908 | 0.023    | 0.002     | 1 | 21.47 | 18 | 246 | 27 | 904  | 1.38  |
| 1944.796 | 10 | Q8IYB3 | K.KETESAEDN KET[181.014]E: 2     | 2.119  | 2.60E-07 | 0.002     | 1 | 71.26 | 18 | 273 | 26 | 904  | 0.87  |
| 1441.639 | 5  | Q8IYB3 | R.HRSPAPATPP HRS[166.9984] 2     | -1.057 | 0.039    | 0.003     | 0 | 18.98 | 17 | 246 | 27 | 904  | 2.17  |
| 2743.289 | 20 | Q8IYB3 | K.KPPAPSPVQ KPPAPPS[166.9] 3     | -0.056 | 0.041    | 0.002     | 0 | 18.76 | 17 | 246 | 27 | 904  | 0.54  |
| 1816.701 | 8  | Q8IYB3 | K.KETESAEDN KETES[166.9984] 2    | 1.775  | 5.00E-05 | 0.002     | 0 | 47.3  | 17 | 246 | 27 | 904  | 1.07  |
| 2743.289 | 8  | Q8IYB3 | K.KPPAPSPVQ KPPAPPS[166.9] 3     | -0.117 | 0.047    | 0.002     | 0 | 18.18 | 17 | 219 | 27 | 904  | 0.54  |
| 1383.571 | 6  | Q8IYB3 | R.APQTSSPPPI APQTS[166.9984] 2   | -0.115 | 0.005    | 0.002     | 0 | 27.39 | 16 | 278 | 27 | 904  | 1.07  |
| 1188.485 | 7  | Q8IYB3 | R.RYSPSPPP.R RY[243.0297]SI: 2   | -0.948 | 0.029    | 0.001     | 1 | 18.06 | 15 | 278 | 27 | 904  | 1.11  |
| 1227.528 | 8  | Q8IYB3 | R.RLSPASPPR.R RLS[166.9984]F 2   | -1.106 | 0.043    | 0.002     | 1 | 17.47 | 16 | 272 | 26 | 904  | 1.92  |
| 1176.555 | 5  | Q8IYB3 | K.TPELPEPSV.K T[181.014]PELF 2   | -0.251 | 0.005    | 0.002     | 0 | 28.02 | 18 | 272 | 26 | 904  | 1.47  |
| 1096.53  | 5  | Q8IYB3 | R.RYSPPIQR.R RY[243.0297]SI: 3   | 0.308  | 0.015    | 0.001     | 1 | 23.43 | 18 | 272 | 26 | 904  | 1.01  |
| 1244.493 | 13 | Q8IYB3 | K.VELSEEDK.VELS[166.9984]: 2     | -0.723 | 0.015    | 0.001     | 0 | 21.35 | 16 | 324 | 29 | 904  | 0.93  |
| 1227.528 | 11 | Q8IYB3 | R.RLSPASPPR.R RLS[166.9984] 3    | -0.09  | 0.039    | 0.001     | 1 | 17.46 | 16 | 324 | 29 | 904  | 0.78  |
| 1383.571 | 5  | Q8IYB3 | R.APQTSSPPPI APQT[181.014] 2     | -0.429 | 0.009    | 0.002     | 0 | 24.24 | 16 | 272 | 26 | 904  | 1.07  |
| 1977.993 | 13 | Q8IYB3 | K.VPKPEPIPEPK VPKPEPIPEPKF: 3    | 0.215  | 0.022    | 0.002     | 1 | 21.49 | 17 | 266 | 28 | 904  | 1.04  |
| 1065.417 | 6  | Q8IYB3 | R.SPSPAPPP.R S[166.9984]PS: 2    | 0.495  | 9.00E-04 | 7.00E-04  | 0 | 32.48 | 15 | 272 | 26 | 904  | 0.68  |
| 1177.586 | 7  | Q8IYH5 | R.QTEPVSPVLK.QTEPV[166.9984] 2   | -0.483 | 0.01     | 0.001     | 0 | 24.72 | 17 | 28  | 3  | 903  | 1.09  |
| 1333.688 | 6  | Q8IYH5 | R.RQTEPVSPVLK.RQTEPV[166.5] 2    | -0.94  | 0.03     | 0.001     | 1 | 20.15 | 17 | 28  | 3  | 903  | 1.03  |
| 1599.188 | 22 | Q8IYJ3 | K.ASDPEEASQA ASDPEEASQAQ: 4      | 2.104  | 2.40E-04 | 0.011     | 0 | 40.61 | 17 | 44  | 2  | 562  | 2.13  |
| 1259.567 | 6  | Q8IYJ3 | R.VPPSPDLPSP VPPS[166.9984] 2    | 0.1    | 0.002    | 7.00E-04  | 0 | 32.54 | 19 | 58  | 2  | 562  | 0.59  |
| 1522.678 | 6  | Q8IZ21 | R.SSSPVQEEI SSS[166.9984]F 2     | 0.955  | 3.20E-04 | 0.002     | 0 | 41.1  | 19 | 41  | 3  | 702  | 1.26  |
| 1606.747 | 8  | Q8IZL8 | R.GSPDGLSQTG GS[166.9984]PI: 2   | -0.685 | 0.014    | 0.001     | 0 | 24.7  | 19 | 30  | 3  | 1130 | 0.72  |
| 3840.765 | 19 | Q8IZL8 | R.EGESPAAGPF EGES[166.9984] 3    | 0.411  | 0.012    | 0.006     | 0 | 23.45 | 17 | 30  | 3  | 1130 | 1.64  |
| 2870.324 | 14 | Q8IZL8 | R.AGSNEDPILA AGSNEDPILAPS 3      | 0.193  | 0.02     | 0.007     | 0 | 22.27 | 18 | 50  | 3  | 1130 | 2.29  |
| 2870.324 | 10 | Q8IZL8 | R.AGSNEDPILA AGSNEDPILAPS 3      | 0.201  | 0.02     | 0.007     | 0 | 22.37 | 18 | 50  | 3  | 1130 | 2.29  |
| 1123.53  | 9  | Q8N0T1 | R.NVFHIASQK.N VFHIAS[166.9] 2    | -0.905 | 0.024    | 0.001     | 0 | 21.53 | 18 | 22  | 1  | 100  | 1.01  |
| 2582.06  | 13 | Q8N108 | R.VNSNGKESPC VNS[166.9984] 3     | 0.874  | 0.004    | 0.005     | 1 | 30.06 | 19 | 144 | 4  | 512  | 2.05  |
| 3556.494 | 13 | Q8N108 | K.DSSGQDETC DSSGQDETC[18] 3      | 0.95   | 0.004    | 0.003     | 0 | 30.82 | 19 | 144 | 4  | 512  | 0.78  |
| 3556.494 | 14 | Q8N108 | K.DSSGQDETC DSS[166.9984]C: 3    | 1.291  | 2.40E-05 | 0.006     | 0 | 52.71 | 19 | 144 | 4  | 512  | 1.71  |
| 3556.494 | 16 | Q8N108 | K.DSSGQDETC DSSGQDETCOS 3        | 1.127  | 8.70E-05 | 0.003     | 0 | 47.24 | 19 | 47  | 2  | 512  | 0.75  |
| 2582.06  | 17 | Q8N108 | R.VNSNGKESPC VNS[166.9984] 3     | 0.343  | 0.013    | 0.005     | 1 | 24.78 | 19 | 109 | 2  | 512  | 2.05  |
| 2582.06  | 7  | Q8N108 | R.VNSNGKESPC VNSNGKES[166] 3     | 0.501  | 0.009    | 0.005     | 1 | 26.36 | 19 | 102 | 2  | 512  | 2.05  |
| 2582.06  | 7  | Q8N108 | R.VNSNGKESPC VNSNGKESPG5 3       | -0.103 | 0.038    | 0.005     | 1 | 20.33 | 19 | 34  | 3  | 512  | 2.05  |
| 3556.494 | 8  | Q8N108 | K.DSSGQDETC DSSGQDETCOS 3        | 1.119  | 0.002    | 0.006     | 0 | 32.55 | 19 | 34  | 3  | 512  | 1.71  |
| 2194.903 | 11 | Q8N163 | R.SVASNOSEMI SVAS[166.9984] 2    | 2.159  | 4.50E-08 | 0.005     | 0 | 79.61 | 19 | 85  | 3  | 923  | 2.14  |
| 2194.903 | 9  | Q8N163 | R.SVASNOSEMI S[166.9984]VA: 2    | 2.119  | 2.80E-07 | 0.005     | 0 | 71.65 | 19 | 114 | 4  | 923  | 2.14  |
| 1785.814 | 12 | Q8N163 | K.DEAQNEGPA DEAQNEGPATE 2        | 0.496  | 9.60E-04 | 9.00E-04  | 0 | 35.51 | 18 | 70  | 3  | 923  | 0.51  |
| 2194.903 | 18 |        |                                  |        |          |           |   |       |    |     |    |      |       |

|          |    |        |                                 |        |          |           |   |       |    |     |   |      |       |
|----------|----|--------|---------------------------------|--------|----------|-----------|---|-------|----|-----|---|------|-------|
| 1002.393 | 6  | Q8N459 | R.DPYGSLDR.H DPGYS[166.99] 2    | -1.026 | 0.033    | 6.00E-04  | 0 | 18.29 | 16 | 18  | 3 | 558  | 0.59  |
| 2968.349 | 19 | Q8N556 | R.TLENSPISCD TLENSPISCC[16] 3   | -0.058 | 0.041    | 0.004     | 0 | 19.74 | 18 | 117 | 6 | 730  | 1.31  |
| 2621.068 | 15 | Q8N556 | K.EAYSGCGPV EAYSGC[160.0] 3     | 1.291  | 1.70E-06 | 0.003     | 0 | 62.83 | 18 | 117 | 6 | 730  | 1.18  |
| 2573.118 | 6  | Q8N556 | K.LSSERPSSDGE LSSERPSS[166.5] 3 | 0.612  | 0.008    | 0.004     | 0 | 28.44 | 20 | 117 | 6 | 730  | 1.67  |
| 2781.18  | 27 | Q8N556 | K.LSSERPSSDGE KLS[166.9984]S 3  | 1.291  | 6.80E-05 | 0.002     | 1 | 47.89 | 19 | 117 | 6 | 730  | 0.72  |
| 1329.583 | 7  | Q8N556 | K.SGTSSQSPV I SGTSSQSP[166.2] 2 | -1.183 | 0.049    | 0.004     | 0 | 18.7  | 18 | 95  | 6 | 730  | 2.95  |
| 2781.18  | 21 | Q8N556 | K.LSSERPSSDGE KLS[166.9984]S 3  | 0.895  | 0.004    | 0.002     | 1 | 30.31 | 19 | 59  | 6 | 730  | 0.72  |
| 2573.118 | 20 | Q8N556 | K.LSSERPSSDGE LSSERPSS[166.9] 3 | 0.045  | 0.03     | 0.004     | 0 | 22.8  | 20 | 110 | 5 | 730  | 1.67  |
| 2621.068 | 15 | Q8N556 | K.EAYSGCGPV EAYSGC[160.0] 3     | 1.193  | 2.50E-04 | 0.003     | 0 | 41.17 | 18 | 59  | 6 | 730  | 1.18  |
| 2573.118 | 26 | Q8N556 | K.LSSERPSSDGE LS[166.9984]SE 3  | 0.102  | 0.026    | 0.004     | 0 | 23.35 | 20 | 80  | 6 | 730  | 1.67  |
| 2968.349 | 13 | Q8N556 | R.TLENSPISCD TLENSPISCC[16] 3   | 0.497  | 0.011    | 0.004     | 0 | 25.33 | 18 | 91  | 6 | 730  | 1.31  |
| 1751.726 | 10 | Q8N573 | R.VVSTSEEEEF VVST[166.99] 2     | -0.581 | 0.011    | 0.002     | 0 | 24.74 | 18 | 25  | 2 | 874  | 0.93  |
| 1751.726 | 12 | Q8N573 | R.VVSTSEEEEF VVST[166.9984] 2   | 2.024  | 3.70E-06 | 0.002     | 0 | 59.56 | 18 | 104 | 4 | 874  | 0.93  |
| 1751.726 | 10 | Q8N573 | R.VVSTSEEEEF VVST[181.014] 2    | 2.274  | 1.80E-06 | 0.002     | 0 | 62.73 | 18 | 63  | 1 | 874  | 0.93  |
| 1751.726 | 12 | Q8N573 | R.VVSTSEEEEF VVST[166.9984] 2   | 2.024  | 1.80E-06 | 0.002     | 0 | 62.58 | 18 | 104 | 4 | 874  | 1.16  |
| 1400.613 | 8  | Q8N5A5 | K.SLDQCVELTQ S[166.9984]LDX 2   | -0.683 | 0.014    | 0.002     | 0 | 22.7  | 17 | 23  | 1 | 531  | 1.42  |
| 1501.66  | 16 | Q8N5D0 | R.KDSDSEDEM V KDS[166.9984] 2   | 0.861  | 4.40E-04 | 0.002     | 1 | 39.16 | 18 | 39  | 1 | 677  | 1.62  |
| 1632.803 | 9  | Q8N5F7 | R.IGELGAPEVM I GELGAPEVWVG 2    | 0.822  | 4.90E-04 | 0.003     | 0 | 37.76 | 18 | 38  | 1 | 415  | 1.6   |
| 1138.539 | 7  | Q8N5I9 | K.IEVLDSPAK H IEVLDS[166.99] 2  | -0.883 | 0.027    | 0.001     | 0 | 20.71 | 17 | 21  | 2 | 185  | 0.86  |
| 1580.66  | 14 | Q8N5J2 | R.ACSMPQELP AC[160.0307]SI 2    | -0.989 | 0.029    | 0.004     | 0 | 20.66 | 18 | 38  | 2 | 469  | 2.74  |
| 852.434  | 4  | Q8N5J2 | R.VLSLQGR.G VLS[166.9984]L 2    | 0.342  | 0.001    | 3.00E-04  | 0 | 35.97 | 20 | 38  | 2 | 469  | 0.37  |
| 1649.68  | 8  | Q8N655 | K.EITSHHEEGG EITSHHEEGGD 2      | -0.684 | 0.016    | 0.001     | 0 | 22.71 | 17 | 23  | 6 | 1247 | 0.8   |
| 1649.68  | 6  | Q8N655 | K.EITSHHEEGG EIT[166.9984] 3    | -0.04  | 0.033    | 0.002     | 0 | 19.95 | 18 | 20  | 4 | 1247 | 1.1   |
| 1649.68  | 7  | Q8N655 | K.EITSHHEEGG EIT[181.014]SH 3   | 0.686  | 0.006    | 0.002     | 0 | 27.21 | 18 | 27  | 4 | 1247 | 1.1   |
| 2552.02  | 17 | Q8N655 | K.ESSTFTDENP ESSTFTDENP[3] 3    | 0.463  | 0.012    | 0.003     | 0 | 24.98 | 18 | 38  | 4 | 1247 | 1.04  |
| 1210.496 | 7  | Q8N6H7 | K.AISSDFFGR AIS[166.9984]S 2    | 2.119  | 1.80E-05 | 0.002     | 0 | 53.53 | 18 | 79  | 2 | 521  | 1.55  |
| 1492.61  | 7  | Q8N6H7 | K.DNPFSLGESF DNPFSLGES[16] 2    | 2.132  | 2.50E-05 | 0.002     | 0 | 50.87 | 17 | 78  | 2 | 521  | 1.67  |
| 1492.61  | 10 | Q8N6H7 | K.DNPFSLGESF DNPF[166.99] 2     | -0.237 | 0.006    | 0.002     | 0 | 27.18 | 17 | 57  | 3 | 521  | 1.67  |
| 1783.752 | 11 | Q8N6N3 | R.LLPEGETLES LPEGETLES[1] 2     | 2.159  | 1.90E-05 | 0         | 0 | 52.25 | 18 | 52  | 2 | 182  | 0.02  |
| 1866.685 | 12 | Q8N6T3 | K.SPSSDWTCA S[166.9984]PSS 2    | 2.024  | 5.20E-08 | 0.002     | 0 | 75.51 | 15 | 76  | 1 | 406  | 0.97  |
| 1866.685 | 10 | Q8N6T3 | K.SPSSDWTCA SP[166.9984]S 2     | 2.127  | 6.20E-07 | 0.002     | 0 | 64.77 | 15 | 65  | 1 | 406  | 0.97  |
| 1434.641 | 9  | Q8N7R7 | R.SFSADNFICG SFS[166.9984]F 2   | 2.274  | 9.50E-06 | 0.002     | 0 | 54.92 | 17 | 55  | 1 | 359  | 1.39  |
| 2479.033 | 18 | Q8N806 | K.VEQNSEPCAC VEQNSEPC[160] 3    | -0.158 | 0.045    | 0.006     | 0 | 18.76 | 18 | 19  | 3 | 425  | 2.4   |
| 1575.669 | 17 | Q8N8A6 | R.VNDAEPGSP V NDAEPGS[16] 2     | 0.846  | 5.00E-04 | 0.002     | 0 | 38.01 | 17 | 38  | 2 | 666  | 1.12  |
| 2688.222 | 17 | Q8N9B5 | K.GAASPVLQEC GAAS[166.99] 3     | 0.228  | 0.02     | 0.003     | 0 | 22.63 | 18 | 23  | 1 | 988  | 1.03  |
| 1831.677 | 13 | Q8N9T8 | K.YVDEENS DGE YVDEENS[166.5] 2  | -0.433 | 0.009    | 0.003     | 0 | 24.22 | 16 | 136 | 4 | 709  | 1.51  |
| 3071.347 | 19 | Q8N9T8 | R.QPALDGLVM QPALDGLVMG 3        | 1.291  | 4.70E-04 | 0.003     | 0 | 39.64 | 19 | 136 | 4 | 709  | 1.03  |
| 2319.95  | 13 | Q8N9T8 | R.AFVDESEDED AFVDES[166.99] 2   | 1.357  | 1.40E-04 | 0.002     | 0 | 44.12 | 18 | 47  | 3 | 709  | 0.81  |
| 1657.659 | 12 | Q8NAF0 | R.ESEEEAEAG ES[166.9984]E 2     | 1.409  | 1.20E-04 | 0.001     | 0 | 43.62 | 17 | 44  | 1 | 562  | 0.78  |
| 1657.659 | 8  | Q8NAF0 | R.ESEEEAEAG ESES[166.9984] 2    | -0.078 | 0.004    | 0.001     | 0 | 28.77 | 17 | 29  | 1 | 562  | 0.78  |
| 1485.597 | 11 | Q8NAX2 | K.STMGSSFSYP STMGSSFS[166.9] 2  | -0.99  | 0.03     | 0.002     | 0 | 18.65 | 16 | 19  | 1 | 398  | 1.66  |
| 1485.597 | 9  | Q8NAX2 | K.STMGSSFSYP STMGSSFS[166] 2    | -0.269 | 0.006    | 0.002     | 0 | 25.84 | 16 | 26  | 1 | 398  | 1.66  |
| 1653.686 | 11 | Q8NB15 | K.SRSPASAEAP SR[166.9984]F 2    | 0.521  | 9.50E-04 | 0.003     | 1 | 33.76 | 16 | 34  | 2 | 262  | 1.76  |
| 3736.574 | 13 | Q8NB15 | R.SPASAEAPGC SPASAEAPGDS 3      | 1.101  | 4.80E-04 | 0.006     | 1 | 38.09 | 17 | 38  | 1 | 262  | 1.61  |
| 3736.574 | 23 | Q8NB15 | R.SPASAEAPGC SPASAEAPGDS 3      | 1.127  | 0.001    | 0.006     | 1 | 34.4  | 17 | 34  | 1 | 262  | 1.61  |
| 1091.429 | 6  | Q8NB49 | R.TFSDSNVL- TF[166.9984]E 2     | -1.09  | 0.035    | 0.002     | 0 | 18.65 | 17 | 19  | 1 | 1132 | 1.51  |
| 1091.429 | 6  | Q8NB49 | R.TFSDSNVL- T[181.014]FSD 2     | -0.67  | 0.013    | 0.002     | 0 | 22.83 | 17 | 23  | 1 | 1132 | 1.51  |
| 1742.7   | 9  | Q8NC44 | R.QALDSEEEEE QALDS[166.99] 2    | 2.159  | 8.80E-07 | 0.002     | 0 | 65.45 | 17 | 65  | 1 | 543  | 1.4   |
| 2183.938 | 5  | Q8NC51 | R.TDKSSASAPD TDKSSAS[166.9] 2   | -1.095 | 0.037    | 0.003     | 1 | 19.6  | 18 | 39  | 4 | 408  | 1.19  |
| 1839.768 | 11 | Q8NC51 | K.SSASAPD VDD SSAS[166.9984] 2  | 0.561  | 7.70E-04 | 0.003     | 0 | 37.16 | 19 | 70  | 6 | 408  | 1.51  |
| 2183.938 | 10 | Q8NC51 | R.TDKSSASAPD TDKSS[166.99] 2    | 0.202  | 0.002    | 0.003     | 1 | 32.57 | 18 | 52  | 6 | 408  | 1.19  |
| 2191.886 | 16 | Q8NC51 | K.SKSEEAHAED SKS[166.9984]E 3   | 0.666  | 0.007    | 0.003     | 1 | 25    | 16 | 65  | 5 | 408  | 1.44  |
| 1839.768 | 8  | Q8NC51 | K.SSASAPD VDD SS[166.9984]A 2   | 2.127  | 1.10E-05 | 0.003     | 0 | 55.5  | 19 | 77  | 7 | 408  | 1.51  |
| 1896.793 | 19 | Q8NC51 | K.SEEAHAEDSV SEEAHAEDSVM 4      | -0.09  | 0.043    | 5.00E-04  | 0 | 18.57 | 17 | 87  | 7 | 408  | 0.24  |
| 2191.886 | 10 | Q8NC51 | K.SKSEEAHAED S[166.9984]KSE 4   | 0.472  | 0.011    | 0.002     | 1 | 23.2  | 16 | 39  | 4 | 408  | 0.76  |
| 2191.886 | 6  | Q8NC51 | K.SKSEEAHAED SKSEEAHAEDS 5      | 0.113  | 0.021    | -5.00E-04 | 1 | 20.13 | 16 | 52  | 6 | 408  | -0.25 |
| 1476.684 | 11 | Q8NC03 | R.GGPASPGGLI GGPAS[166.99] 2    | 1.148  | 2.00E-04 | 0.002     | 0 | 44.03 | 20 | 44  | 1 | 748  | 1.12  |
| 2082.938 | 18 | Q8NCF5 | R.GAADVEVEI GAADVEVEP 2         | -0.101 | 0.004    | 0.002     | 0 | 29.54 | 18 | 30  | 1 | 419  | 0.7   |
| 1130.524 | 11 | Q8NCN4 | K.GSVDQYLRL S GS[166.9984]V 2   | -0.793 | 0.019    | 0.001     | 0 | 24.62 | 20 | 25  | 1 | 708  | 1.28  |
| 1509.574 | 8  | Q8ND04 | K.NESSAPPDPSI NESS[166.9984] 2  | 0.299  | 0.002    | 0.003     | 0 | 30.55 | 15 | 31  | 2 | 991  | 1.75  |
| 1092.509 | 8  | Q8ND05 | R.SSPQLDPLR.K SS[166.9984]PC 2  | -0.718 | 0.017    | 0.002     | 0 | 24.37 | 19 | 24  | 6 | 463  | 1.38  |
| 1092.509 | 8  | Q8ND05 | R.SSPQLDPLR.K S[166.9984]JPC 2  | -0.679 | 0.016    | 0.002     | 0 | 24.77 | 19 | 25  | 6 | 463  | 1.38  |
| 1220.603 | 12 | Q8ND05 | R.SSPQLDPLR.K S[166.9984]PC 3   | -0.086 | 0.041    | 8.00E-04  | 1 | 20.5  | 19 | 26  | 6 | 463  | 0.69  |
| 1942.878 | 5  | Q8ND05 | K.TQLSQGRSSP TQLS[166.9984] 3   | 0.356  | 0.014    | 0.003     | 1 | 23.92 | 18 | 27  | 5 | 463  | 1.48  |
| 1224.562 | 9  | Q8ND07 | R.SASADNLTLP SAS[166.9984]J 2   | 0.057  | 0.003    | 0.001     | 0 | 32.12 | 19 | 32  | 1 | 341  | 0.92  |
| 1545.71  | 7  | Q8ND82 | K.SEPHSGIPEII SEPHS[166.99] 2   | -0.962 | 0.03     | 0.001     | 0 | 20.92 | 18 | 28  | 2 | 737  | 0.9   |
| 1238.566 | 8  | Q8ND11 | R.KPSEDEV LNK KPS[166.9984]E 2  | -0.907 | 0.028    | 0.002     | 0 | 21.48 | 18 | 33  | 5 | 1231 | 2.03  |
| 1056.549 | 9  | Q8ND11 | K.APAPPVLSPK APAPPVLS[166.2] 2  | -0.674 | 0.014    | 0.001     | 0 | 24.81 | 19 | 33  | 5 | 1231 | 1.04  |
| 2531.097 | 9  | Q8ND11 | R.TSGSDDPGIC TS[166.9984]G 2    | 1.499  | 1.00E-04 | 0.003     | 0 | 46.52 | 19 | 64  | 7 | 1231 | 1.29  |
| 2531.097 | 13 | Q8ND11 | R.TSGSDDPGIC TS[166.9984] 3     | 0.175  | 0.023    | 0.006     | 0 | 22.11 | 18 | 42  | 4 | 1231 | 2.28  |
| 1161.505 | 5  | Q8NDT2 | R.RNSLEGYSR S RNS[166.9984] 2   | 0.064  | 0.003    | 0.001     | 1 | 30.19 | 17 | 68  | 4 | 890  | 1.22  |
| 1447.614 | 8  | Q8NDT2 | R.TFLEGDWTSF TFLEGDWTS[16] 2    | 1.624  | 8.30E-05 | 0.002     | 0 | 44.79 | 16 | 68  | 4 | 890  | 1.66  |
| 1549.716 | 7  | Q8NDT2 | R.DRTPHLLYSI DRT[181.014]P 3    | 0.63   | 0.007    | 8.00E-04  | 1 | 27.62 | 19 | 68  | 4 | 890  | 0.54  |
| 1269.493 | 5  | Q8NDT2 | K.ASGDPGASGI ASGDPGASGM 2       | 1.104  | 2.50E-04 | 0.002     | 0 | 41.62 | 18 | 84  | 3 | 890  | 1.24  |
| 1951.796 | 10 | Q8NDV7 | K.EEEPTGWEEF EEEPTGWEEPS 2      | 0.278  | 0.002    | 0.002     | 0 | 33.33 | 18 | 33  | 5 | 1962 | 0.89  |
| 1485.601 | 5  | Q8NDV7 | K.QNTAWDTET QNTAWDTETS 2        | -0.695 | 0.015    | 5.00E-04  | 0 | 22.6  | 17 | 33  | 4 | 1962 | 0.36  |
| 1872.812 | 17 | Q8NDX1 | K.SHSSPLHQDI SHS[166.9984]S 3   | 0.06   | 0.03     | 0.002     | 0 | 21.96 | 19 | 22  | 2 | 1056 | 1     |
| 828.365  | 4  | Q8NE63 | R.LTFPDR.E LT[181.014]FPC 2     | -1.184 | 0.043    | 8.00E-04  | 0 | 17.72 | 17 | 18  | 1 | 616  | 0.92  |
| 2561.952 | 12 | Q8NE71 | K.KAEQSEEEEG KAEQGS[166.9] 2    | 2.159  | 1.40E-08 | 0.004     | 1 | 82.58 | 16 | 327 | 8 | 845  | 1.4   |
| 2433.857 | 10 | Q8NE71 | K.AEQSEEEEG KAEQGS[166.99] 2    | 2.172  | 2.50E-09 | -0.001    | 0 | 86.1  | 13 | 271 | 9 | 845  | -0.43 |
| 1629.76  | 9  | Q8NE71 | K.NQDEEQEAF NQDEEQEAP 2         | 2.159  | 2.40E-08 | 0.001     | 0 | 81.51 | 18 | 327 | 8 | 845  | 0.62  |
| 2263.939 | 11 | Q8NE71 | K.QQPPEPEWIG QQPPEPEWIGD 2      | 1.124  | 2.20E-04 | 0.002     | 0 | 41.79 | 18 | 327 | 8 | 845  | 1.12  |
| 1279.593 | 9  | Q8NE71 | K.AVSEEQPAL AVS[166.9984] 2     | -0.764 | 0.017    | -0.001    | 0 | 21.91 | 17 | 327 | 8 | 845  | -1.05 |
| 2263.939 | 11 | Q8NE71 | K.QQPPEPEWIG QQPPEPEWIGD 2      | -0.99  | 0.028    | 0.002     | 0 | 20.68 | 18 | 240 | 6 | 845  | 1.12  |
| 2431.018 | 14 | Q8NE71 | K.GGNVFAALIG GGNVFAALIQD 3      | -0.053 | 0.033    | 0.005     | 0 | 19.84 | 18 | 198 | 8 | 845  | 2.26  |
| 1709.727 | 7  | Q8NE71 | K.NQDEEQEAF NQDEES[166.9] 2     | -0.077 | 0.004    | 0.003     | 0 | 29.76 | 18 | 271 | 9 | 845  | 1.81  |
| 1684.706 | 11 | Q8NEC7 | K.VHTQETSEGL VHTQETSEGLD 2      | -0.201 | 0.005    | 0.003     | 0 | 28.54 | 1  |     |   |      |       |

|          |    |        |                                 |        |          |           |   |       |    |     |    |      |       |
|----------|----|--------|---------------------------------|--------|----------|-----------|---|-------|----|-----|----|------|-------|
| 2199.988 | 10 | Q8NHV4 | K.LVTSGAESGN LVTSGAESGNLJ 2     | 1.195  | 1.90E-04 | 0.002     | 0 | 43.5  | 19 | 44  | 3  | 660  | 1.12  |
| 2196.954 | 12 | Q8NHZ8 | K.EDVEVVGGE EDVEVVGGS1Ic 2      | 2.159  | 5.10E-07 | 0.002     | 0 | 69.08 | 19 | 69  | 1  | 85   | 0.86  |
| 1327.524 | 6  | Q8NI08 | K.ECLSDPEER.I EC[160.0307]Lc 2  | 3.201  | 0.001    | 0.002     | 0 | 31.54 | 16 | 32  | 2  | 942  | 1.25  |
| 1519.67  | 7  | Q8NI22 | K.NNDGDIYAE NNDGDIYAEF. 2       | 2.024  | 7.40E-06 | 0.002     | 0 | 57.66 | 19 | 58  | 2  | 146  | 1.62  |
| 1572.705 | 7  | Q8NI27 | K.IDITHPSPHSS IDITHPS[166.99] 3 | 0.247  | 0.017    | 0.002     | 0 | 23.81 | 19 | 25  | 3  | 1593 | 1.09  |
| 1603.598 | 9  | Q8NI27 | K.SESPCEPYRN SES[166.9984]F 2   | -1.178 | 0.046    | 9.00E-04  | 0 | 17.77 | 17 | 32  | 3  | 1593 | 0.59  |
| 3404.461 | 20 | Q8NI27 | R.NAVASVQNG NAVASVQNGP 3        | 0.846  | 0.005    | 0.002     | 1 | 28.78 | 18 | 32  | 3  | 1593 | 0.56  |
| 1207.524 | 4  | Q8NI35 | K.VPDSPENELK.V PDS[166.9984] 2  | -1.142 | 0.046    | 3.00E-04  | 0 | 18.13 | 17 | 18  | 3  | 1801 | 0.25  |
| 1628.695 | 9  | Q8NI35 | R.RLFDDEASVD RLFDDEAS[166. 2    | -0.761 | 0.02     | 0.002     | 1 | 22.92 | 18 | 30  | 4  | 1801 | 1.54  |
| 1472.594 | 9  | Q8NI35 | R.LFDDEASVDE LFDDEAS[166.9 2    | -0.485 | 0.009    | 0.002     | 0 | 23.68 | 16 | 30  | 4  | 1801 | 1.3   |
| 1666.806 | 7  | Q8TAD8 | K.QERLSPEVAP QERLS[166.998 3    | -0.045 | 0.037    | 0.002     | 1 | 19.87 | 18 | 51  | 8  | 396  | 1.05  |
| 1991.801 | 15 | Q8TAD8 | R.RPDHSGGSPS RPDHSG[166.99 3    | 0.052  | 0.033    | 0.003     | 0 | 19.84 | 17 | 51  | 8  | 396  | 1.35  |
| 1911.834 | 9  | Q8TAD8 | R.RPDHSGGSPS RPDHSGGS[166 3     | 0.548  | 0.008    | 0.003     | 0 | 26.8  | 19 | 51  | 8  | 396  | 1.68  |
| 1253.604 | 7  | Q8TAD8 | R.LSPEVAPPAH LS[166.9984]PE 3   | 0.682  | 0.006    | 0.001     | 0 | 28.17 | 19 | 32  | 5  | 396  | 0.89  |
| 1991.801 | 7  | Q8TAD8 | R.RPDHSGGSPS RPDHSGGS[166 2     | -0.875 | 0.026    | 0.002     | 0 | 20.8  | 17 | 51  | 8  | 396  | 1     |
| 1863.617 | 8  | Q8TAD8 | R.KDDEDEEEEE KDDEDEEEEEV 2      | 2.197  | 8.90E-07 | 0.003     | 1 | 60.5  | 13 | 108 | 5  | 396  | 1.56  |
| 1156.576 | 4  | Q8TAF3 | K.STVKNWTKL STVKNWTK[181. 2     | -0.386 | 0.008    | 0.001     | 1 | 27.67 | 19 | 28  | 1  | 677  | 1.22  |
| 2742.21  | 10 | Q8TAF3 | K.IIINDNESQTT IINDNESQTT: 3     | -0.06  | 0.039    | 0.002     | 0 | 18.74 | 17 | 19  | 2  | 677  | 0.65  |
| 2075.924 | 8  | Q8TAQ2 | K.DMDEPSPVP DMDEPSP[166.9 2     | 1.471  | 1.10E-04 | 0.003     | 0 | 46.26 | 19 | 57  | 5  | 1214 | 1.32  |
| 1684.717 | 7  | Q8TAQ2 | K.TLTDEVNSPD TLTDEVNS[166. 2    | -0.459 | 0.01     | 0.001     | 1 | 24.95 | 17 | 105 | 7  | 1214 | 0.66  |
| 3343.262 | 15 | Q8TAQ2 | K.GGTMIDLDE GGTMTLDLDCQ 3       | 0.33   | 0.015    | 0.003     | 1 | 21.65 | 16 | 55  | 6  | 1214 | 0.8   |
| 1528.616 | 8  | Q8TAQ2 | K.TLTDEVNSPD TLTDEVNS[166. 2    | 2.127  | 5.70E-06 | 0.001     | 0 | 58.28 | 18 | 105 | 7  | 1214 | 0.8   |
| 1578.691 | 10 | Q8TB03 | K.LDSQEQGRQT LDSQEQGRQT[1 2     | -0.655 | 0.015    | 0.003     | 1 | 24    | 18 | 24  | 1  | 319  | 1.79  |
| 1195.335 | 8  | Q8TB72 | R.QASPTVEVER QAS[166.9984] 2    | 0.622  | 7.00E-04 | 0.002     | 0 | 35.77 | 17 | 46  | 3  | 1066 | 1.22  |
| 1457.606 | 9  | Q8TB72 | K.GKASPFEEQ GKAS[166.9984] 2    | -0.199 | 0.005    | 0.003     | 1 | 27.56 | 17 | 46  | 3  | 1066 | 1.97  |
| 1465.657 | 11 | Q8TB72 | R.RESLTSSDLY RES[166.9984] 2    | -0.893 | 0.024    | 0.002     | 1 | 21.65 | 18 | 29  | 4  | 1066 | 1.1   |
| 2179.849 | 11 | Q8TB85 | R.SEDEDSLEEA S[166.9984]EDI 2   | 2.119  | 3.60E-06 | 8.00E-04  | 0 | 58.09 | 16 | 68  | 3  | 520  | 0.36  |
| 3442.522 | 20 | Q8TB85 | K.QVLTAPGSAG QVLTAPGSAGC 3      | 0.65   | 0.008    | 0.002     | 1 | 26.84 | 18 | 68  | 3  | 520  | 0.5   |
| 3442.522 | 21 | Q8TB85 | K.QVLTAPGSAG QVLTAPGSAGC 3      | 1.204  | 0.002    | 0.002     | 1 | 32.69 | 18 | 75  | 3  | 520  | 0.5   |
| 1396.57  | 5  | Q8TB90 | R.MLASPAPEDI MLAS[166.998 2     | -0.764 | 0.018    | -2.00E-04 | 0 | 23.89 | 19 | 24  | 3  | 767  | -0.17 |
| 1535.685 | 8  | Q8TBZ3 | R.SNSLPHSAVSI SNS[166.9984] 3   | 0.244  | 0.017    | 5.00E-04  | 0 | 23.76 | 19 | 30  | 3  | 569  | 0.29  |
| 1535.685 | 15 | Q8TBZ3 | R.SNSLPHSAVSI S[166.9984]NSI 2  | -0.569 | 0.012    | 0.002     | 0 | 24.86 | 18 | 30  | 3  | 569  | 1.34  |
| 1754.741 | 14 | Q8TC07 | R.NDSTQIPVSI NDS[166.9984] 2    | 1.785  | 4.90E-05 | 0.002     | 0 | 49.4  | 19 | 49  | 1  | 691  | 0.9   |
| 1641.752 | 12 | Q8TC07 | R.KDSSSVEWTF KDS[166.9984] 2    | 2.119  | 9.20E-08 | 0.001     | 1 | 76.29 | 18 | 117 | 2  | 691  | 0.74  |
| 2533.109 | 14 | Q8TCG2 | R.LASADGSPRE LASADGGS[166 3     | 0.644  | 0.008    | 0.002     | 1 | 26.78 | 18 | 27  | 1  | 481  | 0.73  |
| 1811.697 | 9  | Q8TCI2 | K.RENPPVEDSS RENPPVEDS[16 2     | -0.146 | 0.005    | 0.003     | 1 | 26.09 | 15 | 118 | 5  | 826  | 1.82  |
| 1811.697 | 12 | Q8TCI2 | K.RENPPVEDSS RENPPVEDS[1 2      | 1.104  | 2.60E-04 | 0.003     | 1 | 38.59 | 15 | 118 | 5  | 826  | 1.71  |
| 1655.596 | 11 | Q8TCI2 | R.ENPPVEDSSD ENPPVEDS[166 2     | 2.159  | 5.30E-07 | 0.003     | 0 | 65.08 | 15 | 118 | 5  | 826  | 1.64  |
| 1655.596 | 10 | Q8TCI2 | R.ENPPVEDSSD ENPPVEDS[16 2      | 2.197  | 7.20E-07 | 0.003     | 0 | 63.75 | 15 | 108 | 6  | 826  | 1.64  |
| 1559.634 | 6  | Q8TCN5 | K.AQQCVSPSS AQQC[160.030 2      | -0.54  | 0.01     | 0.002     | 0 | 23.15 | 16 | 23  | 5  | 953  | 1.35  |
| 1506.672 | 5  | Q8TCN5 | K.LSPSNTSYSV LS[166.9984]PT 2   | -0.267 | 0.005    | 0.001     | 0 | 28.87 | 19 | 29  | 6  | 953  | 0.72  |
| 847.469  | 4  | Q8TD16 | R.SPILLPK.G S[166.9984]PIU 2    | -0.48  | 0.009    | 9.00E-04  | 0 | 24.75 | 17 | 25  | 4  | 824  | 1.12  |
| 2112.012 | 10 | Q8TD19 | K.VASEAPLEHKI VASEAPLEHKPC 3    | 0.155  | 0.026    | 0.002     | 0 | 20.87 | 17 | 21  | 1  | 979  | 1.19  |
| 1290.518 | 5  | Q8TD86 | K.QQFSPMTEF QQFS[166.9984] 2    | -0.516 | 0.01     | 0.001     | 0 | 23.39 | 16 | 23  | 2  | 740  | 0.92  |
| 1755.641 | 10 | Q8TD86 | K.EGHETPMIDIE EGHETPMIDIDS 2    | -0.536 | 0.011    | 0.002     | 0 | 22.19 | 15 | 27  | 2  | 740  | 1.08  |
| 1290.518 | 8  | Q8TD86 | K.QQFSPMTEF QQFSP[166.99 2      | -1.032 | 0.033    | 0.001     | 0 | 18.21 | 16 | 35  | 3  | 740  | 0.92  |
| 1755.641 | 6  | Q8TD86 | K.EGHETPMIDIE EGHETPMIDIDS 2    | -0.987 | 0.032    | 0.002     | 0 | 17.69 | 15 | 18  | 4  | 740  | 1.08  |
| 1659.613 | 14 | Q8TDD1 | K.IDDRDSDEEC IDDRDS[166.99 2    | 1.472  | 9.80E-05 | 0.003     | 1 | 42.27 | 15 | 64  | 2  | 881  | 1.82  |
| 1625.68  | 8  | Q8TDW5 | R.SPAGAEVQSC S[166.9984]PG. 2   | 1.001  | 3.40E-04 | 0.002     | 0 | 39.56 | 17 | 40  | 3  | 730  | 1.19  |
| 1424.649 | 5  | Q8TOY2 | R.STELVLSPM ST[181.014]ELV 2    | 0.732  | 6.40E-04 | 0.002     | 0 | 37.87 | 18 | 38  | 4  | 1594 | 1.76  |
| 1478.605 | 7  | Q8TOY2 | R.LDLSPEHEDES LDS[166.9984] 2   | -1.002 | 0.033    | 0.004     | 0 | 18.56 | 16 | 40  | 4  | 1594 | 2.55  |
| 1517.711 | 8  | Q8TE68 | R.DRSPAETPP DRS[166.9984] 2     | -0.373 | 0.008    | 0.001     | 1 | 27.82 | 19 | 40  | 2  | 723  | 0.94  |
| 1719.759 | 9  | Q8TE68 | R.APEPQLSPGS APEPQLS[166.9 2    | -0.047 | 0.003    | 7.00E-04  | 0 | 32.08 | 20 | 40  | 2  | 723  | 0.4   |
| 2552.057 | 27 | Q8TE77 | K.APSEELHGD APSEELHGDQ 3        | 1.291  | 2.70E-04 | 0.001     | 0 | 39.23 | 16 | 39  | 1  | 659  | 0.47  |
| 1644.638 | 7  | Q8TEA8 | R.SASSGAEGD SASS[166.9984] 2    | 2.159  | 1.90E-06 | 0.002     | 1 | 60.87 | 16 | 89  | 3  | 209  | 1     |
| 1724.605 | 14 | Q8TEA8 | R.SASSGAEGD S[166.9984]AS: 2    | -0.719 | 0.016    | 0.002     | 1 | 20.36 | 15 | 80  | 3  | 209  | 1     |
| 1418.543 | 8  | Q8TEA8 | R.SASSGAEGD SASS[166.9984] 2    | 1.644  | 7.20E-05 | 0.001     | 0 | 43.99 | 15 | 89  | 3  | 209  | 0.84  |
| 1724.605 | 11 | Q8TEA8 | R.SASSGAEGD SASS[166.9984] 2    | 0.473  | 0.001    | 0.002     | 1 | 32.28 | 15 | 118 | 3  | 209  | 1     |
| 1644.638 | 15 | Q8TEA8 | R.SASSGAEGD SAS[166.9984] 2     | 2.127  | 4.40E-06 | 0.002     | 1 | 57.14 | 16 | 89  | 3  | 209  | 1     |
| 1724.605 | 9  | Q8TEA8 | R.SASSGAEGD SASS[166.9984] 2    | -0.774 | 0.018    | 0.002     | 1 | 19.79 | 15 | 80  | 3  | 209  | 1     |
| 1724.605 | 15 | Q8TEA8 | R.SASSGAEGD S[166.9984]AS: 2    | -0.735 | 0.017    | 0.002     | 1 | 20.21 | 15 | 119 | 3  | 209  | 1     |
| 2413.015 | 21 | Q8TEH3 | R.TLRESDSAEG TLRESDS[166.9 3    | 1.101  | 0.001    | 0.003     | 1 | 35.53 | 19 | 36  | 1  | 1009 | 1.34  |
| 2413.015 | 17 | Q8TEH3 | R.TLRESDSAEG T[181.014]RES: 3   | 0.101  | 0.024    | 0.003     | 1 | 22.37 | 19 | 22  | 2  | 1009 | 1.34  |
| 1753.699 | 20 | Q8TEK3 | K.VAGPADAPM VAGPADAPMD 2        | 1.802  | 5.50E-05 | 0.002     | 0 | 46.57 | 16 | 47  | 1  | 1739 | 1.31  |
| 1203.613 | 7  | Q8TEM1 | R.DLAVPAALTP DLAVPAALT[18 2     | -0.976 | 0.028    | 0.002     | 0 | 20.79 | 18 | 21  | 2  | 1887 | 1.92  |
| 1560.613 | 7  | Q8TEQ6 | K.LESIDGNEEES LES[166.9984] 2   | 1.571  | 9.20E-05 | 0.002     | 0 | 44.26 | 16 | 136 | 8  | 1508 | 1.11  |
| 2210.883 | 11 | Q8TEQ6 | K.ENSQPVENG I ENSQPVENGVS 2     | 2.159  | 2.90E-06 | 0.002     | 0 | 59.58 | 17 | 136 | 8  | 1508 | 0.94  |
| 3687.623 | 28 | Q8TEQ6 | K.ENSQPVENG I ENSQPVENGVS 3     | 1.291  | 1.80E-04 | 0.006     | 1 | 43.16 | 18 | 136 | 8  | 1508 | 1.7   |
| 3687.623 | 27 | Q8TEQ6 | K.ENSQPVENG I ENS[166.9984] 3   | 0.003  | 0.034    | 0.006     | 1 | 20.38 | 18 | 108 | 8  | 1508 | 1.7   |
| 1259.522 | 8  | Q8TEW0 | K.SMDLGIADET S[166.9984]MC 2    | 1.578  | 8.40E-05 | 0.002     | 0 | 45.31 | 17 | 57  | 2  | 1356 | 1.52  |
| 1421.573 | 6  | Q8TEW0 | R.FSPDSQYIDNI FS[166.9984]PT 2  | 0.393  | 0.001    | 0.002     | 0 | 32.48 | 16 | 62  | 4  | 1356 | 1.42  |
| 2419.883 | 11 | Q8TF40 | R.NESSDSALGD NESSDSALGDS 3      | 0.427  | 0.014    | 0.002     | 0 | 19.61 | 13 | 20  | 1  | 1166 | 0.93  |
| 2419.883 | 11 | Q8TF40 | R.NESSDSALGD NESSDSALGDS[ 3     | 0.208  | 0.023    | 0.002     | 0 | 17.43 | 13 | 17  | 3  | 1166 | 0.93  |
| 1928.816 | 14 | Q8TF72 | R.EDSLPESSAF EDS[166.9984] 2    | 1.297  | 1.40E-04 | 0.002     | 0 | 44.52 | 19 | 69  | 8  | 1996 | 0.79  |
| 1499.653 | 8  | Q8TF72 | R.ERPSSWSSLD ERPS[166.9984] 2   | -0.716 | 0.015    | 0.002     | 0 | 23.39 | 18 | 69  | 8  | 1996 | 1.01  |
| 1920.885 | 8  | Q8TF72 | R.DRPGSPESPLI DRPGS[166.99 3    | 0.889  | 0.004    | 0.003     | 0 | 30.23 | 19 | 61  | 6  | 1996 | 1.45  |
| 1769.711 | 11 | Q8TF72 | R.TVSTSTSGNI TVS[166.9984] 2    | 1.692  | 6.30E-05 | 0.002     | 0 | 46.46 | 17 | 96  | 8  | 1996 | 1.01  |
| 1920.885 | 16 | Q8TF72 | R.DRPGSPESPLI DRPGSPES[166 3    | 0.415  | 0.012    | 0.003     | 0 | 25.5  | 19 | 55  | 7  | 1996 | 1.45  |
| 1230.507 | 6  | Q8TF72 | K.SMSAEDLLER S[166.9984]MS 2    | -0.769 | 0.019    | 0.003     | 0 | 20.84 | 16 | 91  | 11 | 1996 | 2.4   |
| 1499.653 | 6  | Q8TF72 | R.ERPSSWSSLD ERPS[166.998 2     | -1.016 | 0.029    | 0.002     | 0 | 20.37 | 18 | 91  | 11 | 1996 | 1.01  |
| 1769.711 | 7  | Q8TF72 | R.TVSTSTSGNI TVST[181.014] 2    | 1.276  | 1.70E-04 | 0.002     | 0 | 42.29 | 17 | 96  | 7  | 1996 | 1.01  |
| 2835.053 | 22 | Q8WU17 | R.EAAAESDREL EAAAES[166.9 3     | 1.04   | 0.003    | 0.003     | 1 | 29.74 | 17 | 30  | 1  | 664  | 1.08  |
| 1842.714 | 9  | Q8WU90 | R.AENGERSDLE AENGERS[166. 2     | 1.095  | 2.60E-04 | 0.003     | 1 | 40.5  | 17 | 46  | 2  | 426  | 1.41  |
| 1351.589 | 9  | Q8WUJ4 | K.DLDRPESQSP DLRPES[166.9 2     | -0.81  | 0.02     | 0.002     | 0 | 23.45 | 17 | 23  | 2  | 911  | 1.61  |
| 1351.589 | 6  | Q8WUJ4 | K.DLDRPESQSP DLRPESQS[16 2      | -0.415 | 0.008    | 0.002     | 0 | 27.43 | 19 | 27  | 2  | 911  | 1.61  |
| 1344.521 | 6  | Q8WUM9 | K.CSPSESLMEI C[160.0307]S[1 2   | 1.602  | 8.70E-05 | 5.00E-04  | 0 | 44.57 | 16 | 45  | 2  | 679  | 0.37  |
| 1426.635 | 8  | Q8WUX9 | R.IDSALEAELE IS[166.9984]DA 2   | -0.719 | 0.017    | 0.002     | 0 | 24.36 | 19 | 24  | 1  | 453  | 1.45  |
| 3419.531 | 11 | Q8WU20 | K.GTEPSPGGTP GT[181.014]EP.     |        |          |           |   |       |    |     |    |      |       |

|          |    |        |                                   |        |          |           |   |       |    |     |    |       |       |
|----------|----|--------|-----------------------------------|--------|----------|-----------|---|-------|----|-----|----|-------|-------|
| 1738.776 | 8  | Q8WWA1 | R.RGSDPASGEV RGSDDPAS[166.984] 3  | 1.101  | 0.003    | 0.001     | 1 | 31.46 | 18 | 67  | 2  | 233   | 0.72  |
| 1438.632 | 12 | Q8WW11 | R.RGESLNDLS RGE[166.9984] 3       | 0.251  | 0.017    | 0.002     | 1 | 23.83 | 19 | 200 | 10 | 1683  | 1.19  |
| 1677.712 | 9  | Q8WW11 | K.REDSFELDSL REDS[166.9984] 2     | 0.513  | 0.001    | 0.002     | 1 | 34.68 | 17 | 200 | 10 | 1683  | 1.16  |
| 1512.596 | 6  | Q8WW11 | R.MYSFDDVLEE MYS[166.9984] 2      | 1.819  | 4.40E-05 | 0.003     | 0 | 47.74 | 17 | 238 | 12 | 1683  | 1.99  |
| 1696.706 | 10 | Q8WW11 | K.SRSTTELDYYS SR[166.9984] 2      | 2.096  | 2.50E-05 | 0.002     | 1 | 51.49 | 18 | 196 | 12 | 1683  | 0.98  |
| 1021.424 | 3  | Q8WW11 | K.SYTSDLQK.K S[166.9984] 2        | -0.602 | 0.014    | 3.00E-04  | 0 | 23.53 | 17 | 200 | 10 | 1683  | 0.33  |
| 1718.647 | 6  | Q8WW11 | R.EGFESDTSDE EGFES[166.9984] 2    | 0.045  | 0.003    | 0.002     | 0 | 30    | 17 | 200 | 10 | 1683  | 1.33  |
| 1630.678 | 18 | Q8WW11 | K.SMSDVSADSI S[166.9984] 2        | 2.119  | 8.80E-06 | 0.001     | 0 | 54.69 | 17 | 238 | 12 | 1683  | 0.84  |
| 1453.573 | 11 | Q8WW11 | R.STTELDYYS ST[181.014] 2         | 1.023  | 3.30E-04 | 0.002     | 0 | 37.78 | 15 | 200 | 10 | 1683  | 1.37  |
| 1696.706 | 6  | Q8WW11 | K.SRSTTELDYYS SRSTT[181.014] 3    | 1.127  | 0.001    | 0.002     | 1 | 34.32 | 18 | 244 | 13 | 1683  | 1.1   |
| 1037.503 | 5  | Q8WW11 | R.ISINQTPGK.S ISINQ[181.014] 2    | -0.973 | 0.027    | 5.00E-04  | 0 | 21.82 | 19 | 244 | 13 | 1683  | 0.5   |
| 1696.706 | 8  | Q8WW11 | K.SRSTTELDYYS S[166.9984] 2       | 1.393  | 1.60E-04 | 0.002     | 1 | 43.44 | 18 | 333 | 16 | 1683  | 1.1   |
| 1668.698 | 7  | Q8WW11 | R.RMYSFDDVLEE RMY[166.9984] 2     | -0.646 | 0.015    | 0.003     | 1 | 23.07 | 17 | 241 | 14 | 1683  | 1.68  |
| 1696.706 | 9  | Q8WW11 | K.SRSTTELDYYS SRST[181.014] 3     | 1.256  | 3.30E-04 | 0.002     | 1 | 40.31 | 18 | 196 | 12 | 1683  | 1.1   |
| 1827.806 | 16 | Q8WW11 | K.GPPQSPVFEV GPPQS[166.9984] 2    | 0.979  | 0.004    | 0.002     | 0 | 29.11 | 17 | 100 | 6  | 1075  | 1.12  |
| 1912.861 | 13 | Q8WW11 | K.EVDGLLTSEPI EVDGLLTSEPM 2       | 1.432  | 1.30E-04 | 0.003     | 0 | 44.87 | 18 | 102 | 6  | 1075  | 1.7   |
| 3598.714 | 10 | Q8WW11 | K.EDKPLPLPSGI EDKPLPLPSGG 4       | 0.212  | 0.021    | 0.003     | 0 | 20.73 | 16 | 126 | 7  | 1075  | 0.83  |
| 3598.714 | 35 | Q8WW11 | K.EDKPLPLPSGI EDKPLPLPSGG 4       | 0.046  | 0.03     | 0.003     | 0 | 19.06 | 16 | 131 | 6  | 1075  | 0.83  |
| 1114.518 | 7  | Q8WW11 | K.SLDQPLSK.S S[166.9984] 2        | -0.99  | 0.032    | 0.002     | 0 | 19.65 | 17 | 20  | 2  | 1544  | 1.02  |
| 1812.66  | 10 | Q8WW11 | R.TAFYNEDDSE TAFYNEDDS[16 2       | 2.159  | 2.60E-07 | 0         | 0 | 70.34 | 17 | 80  | 5  | 1821  | 0.51  |
| 1289.556 | 5  | Q8WW11 | R.AQSYDQAW AQ[166.9984] 2         | -0.239 | 0.006    | 0.002     | 0 | 27.16 | 17 | 80  | 5  | 1821  | 1.35  |
| 1711.692 | 16 | Q8WW11 | R.SRSDGDENEF SRDS[166.9984] 2     | -0.286 | 0.006    | -2.00E-04 | 1 | 25.69 | 16 | 78  | 2  | 1383  | -0.1  |
| 1270.556 | 8  | Q8WW11 | R.IASDEEIQGT IAS[166.9984] 2      | 2.159  | 4.70E-07 | 0.002     | 0 | 68.69 | 18 | 85  | 2  | 1383  | 1.55  |
| 888.397  | 5  | Q8WXE0 | R.SQSFAIR.A QS[166.9984] 2        | -0.972 | 0.026    | 1.00E-04  | 0 | 22.82 | 20 | 23  | 2  | 1202  | 0.13  |
| 2480.141 | 15 | Q8WXE0 | R.VGLSPDSPAG VGLSPDSPAGDI 3       | 0.81   | 0.006    | 0.004     | 1 | 27.46 | 17 | 35  | 3  | 1202  | 1.57  |
| 2480.141 | 10 | Q8WXE0 | R.VGLSPDSPAG VGLSPDSPAGDI 3       | 0.475  | 0.012    | 0.004     | 1 | 24.12 | 17 | 24  | 2  | 1202  | 1.57  |
| 2480.141 | 17 | Q8WXE0 | R.VGLSPDSPAG VGLSPDSPAGDI 3       | 0.919  | 0.004    | 0.004     | 1 | 28.51 | 17 | 29  | 3  | 1202  | 1.57  |
| 1111.478 | 4  | Q8WXE0 | R.SPQESIGAR. S[166.9984] 2        | -0.912 | 0.025    | 0.001     | 0 | 21.41 | 18 | 35  | 3  | 1202  | 1.24  |
| 1245.518 | 8  | Q8WXE1 | R.LSDGDMTASL S[166.9984] 2        | -0.643 | 0.014    | 0.002     | 0 | 23.12 | 17 | 23  | 1  | 791   | 1.22  |
| 4042.673 | 19 | Q8WXG6 | K.EGTHATCASE EGTHATC[160.] 3      | 1.291  | 0.002    | 0.006     | 0 | 34.66 | 19 | 35  | 2  | 1647  | 1.59  |
| 1426.646 | 7  | Q8WXH0 | R.QQSVESLAE QQS[166.9984] 2       | -0.298 | 0.007    | 0.002     | 0 | 27.57 | 18 | 37  | 6  | 6885  | 1.4   |
| 1602.562 | 10 | Q8WXH0 | K.EASENETDMI EAS[166.9984] 2      | -0.14  | 0.004    | 6.00E-04  | 0 | 25.15 | 14 | 37  | 6  | 6885  | 0.38  |
| 1049.53  | 4  | Q8WXH0 | R.MESLETALR.I MESLETALR 2         | -0.978 | 0.028    | 7.00E-04  | 0 | 17.77 | 15 | 34  | 8  | 6885  | 0.63  |
| 2091     | 9  | Q8WXI9 | R.LTPSPDIVLSE LTPSPDIVLS[16 2     | -0.833 | 0.023    | 0.003     | 0 | 22.22 | 18 | 22  | 1  | 593   | 1.23  |
| 2091     | 17 | Q8WXI9 | R.LTPSPDIVLSE LTPSPDIVLSDN 2      | -0.94  | 0.029    | 0.003     | 0 | 21.14 | 18 | 21  | 2  | 593   | 1.23  |
| 2984.299 | 19 | Q8WXR4 | R.RNESAAHNQ RNESAAHNQA 4          | -0.295 | 0.037    | 0.005     | 1 | 19.28 | 17 | 19  | 3  | 1341  | 1.62  |
| 2828.198 | 23 | Q8WXR4 | R.RNESAAHNQ RNESAAHNQA 4          | 0.092  | 0.027    | 9.00E-04  | 0 | 20.28 | 17 | 20  | 1  | 1341  | 0.33  |
| 1500.734 | 9  | Q8WXX5 | K.KISLEQIAFEI KIS[166.9984] 2     | 2.274  | 1.50E-06 | 0.002     | 1 | 64.25 | 19 | 64  | 3  | 260   | 1.66  |
| 1864.88  | 17 | Q8WY36 | R.TADGRVSPAC TADGRV[166.] 3       | 0.186  | 0.022    | 0.001     | 1 | 22.21 | 18 | 22  | 1  | 941   | 0.56  |
| 1819.765 | 10 | Q8WYA6 | K.EYEAENIGDGR EYEAENIGDGRS 3      | 0.667  | 0.007    | 0.003     | 1 | 27.01 | 18 | 27  | 1  | 563   | 1.57  |
| 1338.467 | 8  | Q8WYH8 | K.MEGSDPESSG MEGS[166.9984] 2     | -0.905 | 0.027    | 0.002     | 1 | 17.5  | 14 | 18  | 1  | 240   | 1.14  |
| 985.475  | 7  | Q8WYL5 | K.KLEFGSPK.G KLEFGS[166.99 2      | -0.803 | 0.018    | 7.00E-04  | 1 | 22.52 | 18 | 23  | 3  | 1049  | 0.71  |
| 1090.476 | 6  | Q8WYL5 | K.SPPFFRYR.L S[166.9984] 2        | -1.083 | 0.041    | 0.001     | 0 | 16.72 | 15 | 23  | 2  | 1049  | 1.33  |
| 1350.598 | 8  | Q8WYP5 | R.TTFFLNSPEK TTFFLNS[166.] 2      | 0.31   | 0.002    | 0.002     | 0 | 31.65 | 16 | 59  | 6  | 2266  | 1.54  |
| 968.408  | 4  | Q8WYP5 | R.EVSPSDVR.E EVS[166.9984] 2      | -0.554 | 0.011    | 6.00E-04  | 0 | 22.01 | 15 | 34  | 5  | 2266  | 0.66  |
| 1726.663 | 5  | Q8WYP5 | K.EHQEMDEGS EHQEMDEGSQ 2          | -1.077 | 0.04     | 0.003     | 0 | 17.78 | 16 | 34  | 5  | 2266  | 1.65  |
| 1379.624 | 11 | Q8WYP5 | R.ISFVEDVHPK IS[166.9984] 2       | 0.002  | 0.036    | 5.00E-04  | 0 | 21.38 | 19 | 32  | 4  | 2266  | 0.39  |
| 1014.502 | 5  | Q8WYP5 | K.SPLYLSR.S S[166.9984] 2         | -0.606 | 0.012    | 8.00E-04  | 0 | 25.49 | 19 | 59  | 6  | 2266  | 0.84  |
| 837.448  | 4  | Q8WZ42 | K.SIPITV.K V S[166.9984] 2        | -0.537 | 0.011    | 0.001     | 0 | 21.18 | 14 | 21  | 32 | 34350 | 1.28  |
| 1192.55  | 6  | Q92466 | R.SPLEPEAK.I S[166.9984] 2        | 1.875  | 3.80E-05 | 0.001     | 0 | 49.3  | 18 | 71  | 3  | 427   | 1.2   |
| 1435.683 | 10 | Q92466 | R.SRSPLEPEEA SR[166.9984] 3       | 0.474  | 0.011    | 1.00E-04  | 1 | 25.06 | 18 | 79  | 3  | 427   | 0.07  |
| 1435.683 | 6  | Q92466 | R.SRSPLEPEEA SR[166.9984] 3       | 0.42   | 0.013    | 1.00E-04  | 1 | 24.55 | 18 | 66  | 3  | 427   | 0.07  |
| 2082.895 | 25 | Q92499 | K.DNTRPGANSI DNTRPGANS[1 3        | 0.757  | 0.005    | 0.003     | 0 | 27.89 | 18 | 28  | 1  | 740   | 1.3   |
| 2405.076 | 6  | Q92503 | K.EGLSGDALSI EGLSGDALSSPS 2       | -1.177 | 0.042    | 0.002     | 0 | 20.78 | 20 | 21  | 3  | 715   | 0.63  |
| 2405.076 | 9  | Q92503 | K.EGLSGDALSI EGLSGDALSSPS 2       | 0.007  | 0.003    | 0.002     | 0 | 32.62 | 20 | 33  | 2  | 715   | 0.63  |
| 2405.076 | 10 | Q92503 | K.EGLSGDALSI EGLSGDALSSPS 2       | -0.007 | 0.003    | 0.002     | 0 | 32.47 | 20 | 56  | 5  | 715   | 0.63  |
| 1097.524 | 6  | Q92508 | R.TASELLDR.R TAS[166.9984] 2      | 1.215  | 2.10E-04 | 0.002     | 0 | 43.7  | 19 | 86  | 4  | 2521  | 1.37  |
| 1413.553 | 7  | Q92508 | R.SGSEAVTDP SGS[166.9984] 2       | 0.801  | 4.50E-04 | 0.001     | 0 | 37.56 | 17 | 86  | 4  | 2521  | 0.68  |
| 1611.701 | 8  | Q92538 | R.AASSSSGSP AASSSSSPGS[16 2       | 0.004  | 0.003    | 0.004     | 0 | 30.59 | 18 | 36  | 4  | 1859  | 2.48  |
| 2838.185 | 15 | Q92538 | R.ADAPDAGAC ADAPDAGACS 3          | 0.335  | 0.014    | -5.00E-04 | 0 | 23.7  | 18 | 36  | 4  | 1859  | -0.17 |
| 1948.807 | 10 | Q92538 | R.GYTSDEVYT GYTS[166.9984] 2      | -0.806 | 0.021    | 0.001     | 0 | 23.47 | 19 | 73  | 4  | 1859  | 0.52  |
| 2092.887 | 24 | Q92540 | K.SPPHSGFQC S[166.9984] 2         | 0.917  | 0.004    | 0.002     | 0 | 29.53 | 18 | 30  | 2  | 1137  | 0.88  |
| 1876.74  | 13 | Q92545 | R.RSSDPWSNSS R[166.9984] 3        | -0.137 | 0.041    | 0.002     | 1 | 16.98 | 16 | 17  | 2  | 1883  | 0.77  |
| 2510.04  | 26 | Q92552 | K.ALTSADGASE ALTSADGASEE 3        | 1.291  | 3.50E-07 | 0.003     | 0 | 69.85 | 18 | 70  | 1  | 414   | 1.08  |
| 3321.423 | 27 | Q92560 | R.APAASEGNHT APAASEGNHT 4         | 1.685  | 6.30E-04 | 0.003     | 0 | 36.42 | 17 | 36  | 1  | 729   | 0.79  |
| 2841.185 | 25 | Q92576 | K.RQLQEDQENI RQLQEDQENNL 3        | 1.224  | 8.00E-06 | 0.002     | 1 | 56.16 | 18 | 59  | 4  | 2039  | 0.59  |
| 1249.553 | 6  | Q92576 | R.MAPPVDDL SI MAPPVDDL[1 2        | -0.692 | 0.015    | 9.00E-04  | 0 | 23.63 | 18 | 61  | 3  | 2039  | 0.72  |
| 1377.648 | 12 | Q92576 | R.MAPPVDDL SI MAPPVDDL[1 2        | -0.072 | 0.041    | 7.00E-04  | 1 | 19.64 | 18 | 22  | 4  | 2039  | 0.54  |
| 1418.616 | 10 | Q92597 | R.TASGSSVTLT TAS[166.9984] 2      | 1.372  | 1.40E-04 | 0.002     | 0 | 45.27 | 19 | 45  | 1  | 394   | 1.2   |
| 1418.616 | 9  | Q92597 | R.TASGSSVTLT TAS[166.9984] 2      | 1.406  | 1.30E-04 | 0.002     | 0 | 45.61 | 19 | 45  | 1  | 394   | 1.2   |
| 4717.102 | 19 | Q92598 | K.NVQQDNSEA NVQQDNSEAG 4          | 1.659  | 6.10E-04 | 0.007     | 1 | 35.16 | 16 | 108 | 4  | 858   | 1.43  |
| 3997.813 | 25 | Q92598 | K.NVQQDNSEA NVQQDNSEAG 4          | 1.685  | 6.40E-04 | 0.004     | 0 | 36.42 | 17 | 104 | 4  | 858   | 0.91  |
| 4077.779 | 17 | Q92598 | K.NVQQDNSEA NVQQDNSEAG 4          | 2.919  | 3.70E-05 | 0.007     | 0 | 48.76 | 17 | 179 | 8  | 858   | 1.84  |
| 4077.779 | 16 | Q92598 | K.NVQQDNSEA NVQQDNSEAG 4          | 5.233  | 1.00E-04 | 0.003     | 0 | 44.71 | 17 | 155 | 8  | 858   | 0.72  |
| 4077.779 | 14 | Q92598 | K.NVQQDNSEA NVQQDNSEAG 4          | 1.203  | 0.002    | 0.003     | 0 | 31.64 | 17 | 111 | 7  | 858   | 0.72  |
| 2201.93  | 7  | Q92598 | K.NNFGAEPHK NNFGAEPHQ 3           | 0.026  | 0.032    | 0.002     | 0 | 20.61 | 18 | 111 | 7  | 858   | 0.83  |
| 1051.518 | 8  | Q92598 | K.IESPILER.T IES[166.9984] 2      | -0.176 | 0.046    | 0.002     | 1 | 19.58 | 19 | 179 | 8  | 858   | 1.42  |
| 1744.706 | 11 | Q92609 | R.TSSTLDESEGT TS[166.9984] 2      | 2.159  | 1.80E-05 | 0.002     | 0 | 52.22 | 17 | 71  | 5  | 795   | 1.11  |
| 1566.716 | 9  | Q92609 | K.NISSSPVESLI NISSSP[166.99 2     | -0.819 | 0.003    | 0.002     | 0 | 31.74 | 19 | 71  | 5  | 795   | 1.13  |
| 1288.546 | 8  | Q92609 | R.EFTGSPSSA EFTGSPSSA[166.9984] 2 | 0.039  | 0.002    | 0.001     | 0 | 20.22 | 16 | 101 | 7  | 795   | 1.1   |
| 1744.706 | 8  | Q92609 | R.TSSTLDESEGT TS[166.9984] 2      | 2.024  | 1.10E-05 | 0.002     | 0 | 54.47 | 17 | 84  | 7  | 795   | 1.11  |
| 1900.807 | 11 | Q92609 | R.TSSTLDESEGT TS[166.9984] 2      | 0.211  | 0.002    | 0.001     | 1 | 37.64 | 23 | 101 | 7  | 795   | 0.76  |
| 1212.533 | 10 | Q92609 | K.SESMPQLNH SES[166.9984] 2       | -0.655 | 0.015    | 0.002     | 0 | 22    | 16 | 79  | 5  | 795   | 1.41  |
| 1900.807 | 10 | Q92609 | R.TSSTLDESEGT TS[181.014] 3       | -0.078 | 0.042    | 0.002     | 1 | 24.56 | 23 | 79  | 5  | 795   | 0.86  |
| 1288.546 | 5  | Q92609 | R.EFTGSPSSA EFTGSPSSA[166.2       | -0.7   | 0.015    | 0.001     | 0 | 21.55 | 16 | 71  | 5  | 795   | 1.1   |
| 3557.52  | 18 | Q92610 | R.LLGPAPEDDG LLGPAPEDDGG 3        | 1.275  | 0.002    | 0.005     | 0 | 34.07 | 19 | 34  | 2  | 1267  | 1.4   |
| 2563.069 | 18 | Q92613 | R.NSSTETDQF NSSTETDQPH 3          | 1.193  | 1.10E-04 | 7.00E-04  | 0 | 46.26 | 19 | 46  | 1  | 823   | 0.2   |

|          |    |              |                                  |        |          |           |   |       |    |     |   |        |       |
|----------|----|--------------|----------------------------------|--------|----------|-----------|---|-------|----|-----|---|--------|-------|
| 3509.451 | 18 | Q92769       | R.MLPHAPGVQ MLPHAPGVQM 4         | 0.239  | 0.017    | 0.005     | 0 | 22.96 | 18 | 68  | 2 | 488    | 1.4   |
| 2081.728 | 14 | Q92769       | R.IACDEEFSDE IAC[160.0307]C 2    | 1.5    | 9.70E-05 | 8.00E-04  | 0 | 40.54 | 13 | 57  | 3 | 488    | 0.36  |
| 2081.728 | 18 | Q92769       | R.IACDEEFSDE IAC[160.0307]C 2    | 2.113  | 2.40E-05 | 8.00E-04  | 0 | 46.66 | 13 | 47  | 3 | 488    | 0.36  |
| 1420.61  | 5  | Q92785       | K.EDSQPTPVSI EDS[166.9984]C 2    | -1.146 | 0.04     | 0.002     | 0 | 20.1  | 19 | 20  | 1 | 391    | 1.12  |
| 2274.899 | 8  | Q92793       | K.EEEESSNGT EEEESSNGTAS 2        | -0.922 | 0.026    | 0.006     | 0 | 21.33 | 18 | 21  | 1 | 2442   | 2.57  |
| 2103.829 | 15 | Q92794       | R.KSSTSDWPTC KS[166.9984]S 3     | 0.438  | 0.011    | 0.003     | 1 | 23.7  | 17 | 28  | 3 | 2004   | 1.22  |
| 1308.61  | 7  | Q92794       | R.RLSEGVPEWR RLS[166.9984]E 2    | -0.868 | 0.026    | 7.00E-04  | 1 | 21.87 | 18 | 28  | 3 | 2004   | 0.53  |
| 1975.734 | 9  | Q92794       | K.KSSTSDWPTD KS[166.9984]TS 2    | 0.858  | 4.60E-04 | 0.001     | 0 | 37.13 | 16 | 37  | 2 | 2004   | 0.56  |
| 2103.829 | 7  | Q92794       | R.KSSTSDWPTC KS[166.9984]S 3     | 0.09   | 0.024    | 0.003     | 1 | 20.25 | 17 | 20  | 2 | 2004   | 1.22  |
| 1975.734 | 7  | Q92794       | K.KSSTSDWPTD KS[166.9984]TS 2    | 0.159  | 0.002    | 0.001     | 0 | 30.17 | 16 | 30  | 2 | 2004   | 0.56  |
| 1975.734 | 6  | Q92794       | K.KSSTSDWPTD KS[166.9984]TS 2    | 0.706  | 6.60E-04 | 0.001     | 0 | 35.59 | 16 | 36  | 3 | 2004   | 0.56  |
| 1975.734 | 6  | Q92794       | K.KSSTSDWPTD S[181.014]SC 2      | -0.303 | 0.007    | 0.001     | 0 | 25.5  | 16 | 38  | 3 | 2004   | 0.56  |
| 2103.829 | 9  | Q92794       | R.KSSTSDWPTC KS[181.014]S 3      | -0.005 | 0.03     | 0.003     | 1 | 19.29 | 17 | 25  | 3 | 2004   | 1.22  |
| 1523.681 | 5  | Q92797       | R.SPQTLAPVGE S[166.9984]PQ 2     | -0.869 | 0.026    | 0.001     | 0 | 20.86 | 17 | 38  | 5 | 1274   | 0.84  |
| 1937.867 | 11 | Q92797       | K.EERSPQTLAP EERS[166.9984]E 2   | 0.434  | 0.001    | 6.00E-04  | 1 | 34.89 | 18 | 38  | 5 | 1274   | 0.31  |
| 1648.721 | 13 | Q92797       | K.TPSPAEDAR TPS[166.9984]E 2     | -0.887 | 0.027    | 0.002     | 1 | 19.66 | 16 | 62  | 5 | 1274   | 0.99  |
| 1523.681 | 21 | Q92797       | R.SPQTLAPVGE SPQ[181.014] 2      | -0.105 | 0.004    | 0.001     | 0 | 28.49 | 17 | 34  | 5 | 1274   | 0.84  |
| 2975.257 | 16 | Q92804       | K.QSSYSQQPVN QSSYSQQPVNN 3       | 1.224  | 6.00E-06 | -6.00E-04 | 0 | 55.46 | 16 | 55  | 2 | 592    | -0.19 |
| 2263.844 | 23 | Q92870       | R.NAPHPDDDD NAPHPDDDDSC 3        | 0.32   | 0.015    | 0.002     | 0 | 20.54 | 15 | 30  | 2 | 758    | 0.84  |
| 2263.844 | 19 | Q92870       | R.NAPHPDDDD NAPHPDDDDSC 3        | 0.285  | 0.019    | -0.003    | 0 | 18.19 | 13 | 34  | 2 | 758    | -1.24 |
| 1709.763 | 5  | Q92870       | K.GSLSSVTPSPT G[166.9984] 2      | -0.373 | 0.008    | -0.002    | 0 | 25.82 | 17 | 30  | 2 | 758    | -0.9  |
| 1709.763 | 6  | Q92870       | K.GSLSSVTPSPT G[166.9984]L 2     | -0.869 | 0.025    | -0.002    | 0 | 20.86 | 17 | 21  | 1 | 758    | -0.9  |
| 1431.626 | 13 | Q92888       | R.DGDGVPGGC DGDGVPGGGP 2         | -1.029 | 0.036    | 5.00E-04  | 0 | 19.25 | 17 | 19  | 2 | 912    | 0.34  |
| 1377.62  | 8  | Q92890       | R.FVAFSGQSF FVAFSGQSQS[1 2       | 2.119  | 1.90E-05 | 0.002     | 0 | 52.5  | 18 | 52  | 2 | 307    | 1.34  |
| 1600.798 | 8  | Q92890       | K.GVEPSPPIK GVEPSP[166.9 2       | -0.636 | 0.014    | 0.002     | 0 | 24.17 | 18 | 63  | 2 | 307    | 1.19  |
| 2644.017 | 24 | Q92903       | R.EGEAAGGDH EGEAAGGDHE[ 3        | 1.136  | 0.003    | -0.002    | 1 | 29.68 | 16 | 30  | 1 | 461    | -0.57 |
| 3282.447 | 20 | Q92908       | K.NTSPPTQPTA NTSPT[181.014 3     | 0.355  | 0.015    | 0.003     | 0 | 23.87 | 18 | 24  | 1 | 595    | 1.01  |
| 3282.447 | 17 | Q92908       | K.NTSPPTQPTA NTSPT[181.01 3      | -0.115 | 0.043    | 0.003     | 0 | 19.22 | 18 | 19  | 1 | 595    | 1.01  |
| 1646.661 | 5  | Q92922       | K.HSPSPPPPPTI HSPSP[166.9984]P 2 | -1.2   | 0.045    | 0.001     | 0 | 17.58 | 17 | 18  | 1 | 1105   | 0.71  |
| 1694.79  | 6  | Q92922       | R.KHSPSPPPPPTI HSPSP[166.998 3   | 0.279  | 0.016    | 0.001     | 1 | 24.15 | 19 | 24  | 4 | 1105   | 0.79  |
| 1796.733 | 12 | Q92925       | K.AEGDSAGTAA AEGDSAGTAGT 2       | 1.666  | 7.50E-05 | 0.004     | 0 | 46.21 | 17 | 46  | 1 | 531    | 2.03  |
| 1440.587 | 9  | Q92934       | R.RMSDFVDSFR RMS[166.9984] 2     | -0.843 | 0.042    | 0.002     | 1 | 22.1  | 18 | 50  | 4 | 168    | 1.46  |
| 2474.944 | 16 | Q92934       | R.HSSYPAGTED HSS[166.9984] 3     | 1.291  | 8.90E-04 | 0.004     | 0 | 34.23 | 16 | 49  | 3 | 168    | 1.4   |
| 2474.944 | 12 | Q92934       | R.HSSYPAGTED HSSV[243.0297 3     | 0.567  | 0.009    | 0.004     | 0 | 24.01 | 16 | 40  | 3 | 168    | 1.4   |
| 1284.485 | 6  | Q92934       | R.RMSDFVDSFR RMS[166.9984]C 2    | -0.379 | 0.008    | 0.002     | 0 | 24.74 | 16 | 50  | 4 | 168    | 1.64  |
| 1434.662 | 13 | Q92945       | K.VQISPDSSGGL VQIS[166.9984] 2   | -0.51  | 0.01     | 0.002     | 0 | 26.44 | 19 | 26  | 1 | 711    | 1.16  |
| 1975.74  | 14 | Q92974       | R.LQDSSDPDTG LQDSS[166.998 2     | 1.666  | 7.10E-05 | 0.003     | 0 | 46.21 | 17 | 96  | 6 | 986    | 1.6   |
| 1124.462 | 7  | Q92974       | R.QELGSPEER L QELGS[166.998 2    | -0.024 | 0.004    | 0.001     | 0 | 29.31 | 17 | 104 | 6 | 986    | 1.04  |
| 1444.65  | 14 | Q92974       | R.ILSQSTDSLNA ILSOS[166.9984 2   | -1.211 | 0.049    | 0.004     | 0 | 18.44 | 18 | 104 | 6 | 986    | 2.67  |
| 2516.13  | 12 | Q92974       | R.EPALPLEPDS EPALPLEPDSGG 2      | 2.159  | 1.70E-05 | 0.005     | 0 | 53.39 | 18 | 104 | 6 | 986    | 1.85  |
| 2516.13  | 14 | Q92974       | R.EPALPLEPDS EPALPLEPDSGG 2      | 0.7    | 6.40E-04 | 0.005     | 0 | 37.55 | 18 | 55  | 6 | 986    | 1.85  |
| 1975.74  | 9  | Q92974       | R.LQDSSDPDTG LQDSS[166.9984 2    | 1.011  | 3.20E-04 | 0.003     | 0 | 39.66 | 17 | 72  | 5 | 986    | 1.6   |
| 2927.173 | 10 | Q92974       | R.LQDSSDPDTG LQDSS[166.998 3     | -0.132 | 0.043    | 0.001     | 1 | 19.03 | 18 | 55  | 6 | 986    | 0.35  |
| 2847.207 | 11 | Q92974       | R.LQDSSDPDTG LQDSSDPDTGSI 3      | -0.111 | 0.046    | 0.001     | 1 | 19.25 | 18 | 85  | 4 | 986    | 0.36  |
| 2847.207 | 21 | Q92974       | R.LQDSSDPDTG LQDSSDPDTGSI 3      | 0.245  | 0.02     | 0.001     | 1 | 22.78 | 18 | 55  | 4 | 986    | 0.36  |
| 2847.207 | 10 | Q92974       | R.LQDSSDPDTG LQDSSDPDTGSI 3      | 0.1    | 0.028    | 0.001     | 1 | 21.34 | 18 | 96  | 6 | 986    | 0.36  |
| 1403.643 | 6  | Q92993       | K.NGLPGSRPS NGLPGSRPS[1 2        | -0.756 | 0.017    | 6.00E-04  | 0 | 23.99 | 19 | 24  | 2 | 513    | 0.43  |
| 2441.059 | 9  | Q92994       | R.GLSSAGGGSF GLSSAGGGS[1E 3      | 1.256  | 2.00E-04 | 0.003     | 1 | 42.96 | 18 | 43  | 2 | 677    | 1.33  |
| 1192.459 | 9  | Q92997       | K.SMDDDFGVV S[166.9984]MC 2      | -0.161 | 0.004    | 0.001     | 0 | 23.94 | 13 | 24  | 2 | 716    | 1.09  |
| 2317.938 | 13 | Q93008       | R.NGLIAIEGTG NGLIAIEGTGSD 2      | 2.159  | 9.70E-06 | 0.002     | 0 | 55.97 | 18 | 56  | 1 | 2570   | 1.01  |
| 1544.671 | 8  | Q93009       | K.DDPENDNSEL DDPENDNSELP 2       | -0.759 | 0.017    | 0.002     | 0 | 22.94 | 18 | 49  | 2 | 1102   | 1.25  |
| 2727.043 | 20 | Q93009       | K.AGEEQQLSEPE AGEQQLS[166. 3     | 1.291  | 8.20E-05 | 0.003     | 0 | 43.55 | 15 | 44  | 2 | 1102   | 1.2   |
| 2478.118 | 12 | Q93100       | R.QSSTPSAPEL QS[181.014] 3       | 0.276  | 0.017    | 0.004     | 0 | 20.88 | 18 | 23  | 3 | 1093   | 1.65  |
| 2478.118 | 23 | Q93100       | R.QSSTPSAPEL QS[166.9984] 3      | -0.026 | 0.034    | 0.004     | 0 | 20.1  | 18 | 20  | 2 | 1093   | 1.65  |
| 2412.931 | 18 | Q969E4       | K.REDEGEPEGR REDEGEPEGDEG 3      | 0.102  | 0.029    | 0.003     | 1 | 18.34 | 15 | 39  | 4 | 200    | 1.22  |
| 2256.83  | 14 | Q969E4       | R.EDEGEPEGDE EDEGEPEGDEG 2       | 0.618  | 7.10E-04 | 0.002     | 0 | 31.73 | 13 | 39  | 4 | 200    | 1.13  |
| 3865.593 | 21 | Q969E4       | K.NEGNLENEGK NEGNLENEGK 4        | -0.06  | 0.035    | -0.003    | 1 | 18.97 | 17 | 39  | 4 | 200    | -0.79 |
| 1441.573 | 10 | Q969E4       | K.SDEEEKDVEI S[166.9984]DEI 2    | -1.065 | 0.037    | 0.001     | 0 | 15.9  | 14 | 34  | 4 | 200    | 0.97  |
| 1384.627 | 13 | Q969H4       | R.SPSSLAPLSPI S[166.9984]PSL 2   | 0.013  | 0.003    | 0.002     | 0 | 32.68 | 20 | 33  | 1 | 720    | 1.74  |
| 1384.627 | 7  | Q969H4       | R.SPSSLAPLSPI SPS[166.9984]L 2   | 0.019  | 0.003    | 0.002     | 0 | 32.72 | 20 | 33  | 2 | 720    | 1.74  |
| 2191.837 | 11 | Q969T4       | R.QRSDDSPST QRS[166.9984] 2      | -0.763 | 0.018    | 0.002     | 1 | 19.92 | 15 | 20  | 1 | 207    | 1.13  |
| 1201.449 | 5  | Q969V6       | R.AGSCCLSPGG AGSC[160.0307 2     | -0.858 | 0.021    | 0.001     | 0 | 19    | 15 | 19  | 2 | 931    | 0.94  |
| 1617.622 | 7  | Q969K1       | R.AVDSFPGGE AVS[166.9984] 2      | -0.952 | 0.029    | 0.002     | 0 | 20.02 | 17 | 20  | 1 | 311    | 1.23  |
| 1800.791 | 6  | Q96A00       | R.QPSPSHDGS QPS[166.9984] 2      | -0.62  | 0.013    | 0.002     | 0 | 24.35 | 18 | 24  | 4 | 147    | 0.93  |
| 1880.758 | 8  | Q96A00       | R.QPSPSHDGS QPS[166.9984] 2      | -0.157 | 0.005    | 0.001     | 0 | 26.96 | 16 | 37  | 6 | 147    | 0.61  |
| 1800.791 | 7  | Q96A00       | R.QPSPSHDGS QPSPSHDGS[16 3       | 0.126  | 0.022    | 0.002     | 0 | 22.61 | 19 | 31  | 5 | 147    | 1.1   |
| 1880.758 | 7  | Q96A00       | R.QPSPSHDGS QPS[166.9984] 2      | -1.114 | 0.045    | 0.002     | 0 | 17.39 | 16 | 21  | 4 | 147    | 0.82  |
| 953.603  | 6  | Q96A08_06081 | R.LLLPGEELAK H LLLPGEELAK 2      | -0.193 | 0.005    | 0.001     | 0 | 23.6  | 13 | 24  | 1 | 1.3    |       |
| 833.453  | 4  | Q96A49       | K.TPPVVIK S T[181.014]PPV 2      | -0.3   | 0.007    | 8.00E-04  | 0 | 27.55 | 18 | 28  | 2 | 352    | 0.93  |
| 1168.561 | 7  | Q96A57       | R.TNLATGIPSS TNLATGIPSS[16 2     | -0.545 | 0.01     | 0.001     | 0 | 27.11 | 20 | 27  | 1 | 120    | 0.92  |
| 1888.844 | 9  | Q96A73       | R.QPASAQSTPS QPASAQSTPST 2       | -0.761 | 0.018    | 0.004     | 0 | 22.92 | 18 | 23  | 1 | 305    | 1.98  |
| 1888.844 | 12 | Q96A73       | R.QPASAQSTPS QPASAQSTPST 2       | 0.155  | 0.022    | 0.003     | 0 | 21.91 | 18 | 34  | 2 | 305    | 1.77  |
| 1782.773 | 10 | Q96AC1       | K.LSIMITSENHLJ LSIMITS[166.99 3  | 0.227  | 0.018    | 0.002     | 0 | 21.59 | 17 | 22  | 1 | 680    | 1.2   |
| 1782.773 | 9  | Q96AC1       | K.LSIMITSENHLJ LSIMITSENHLN 3    | -0.899 | 0.025    | 0.001     | 0 | 20.55 | 17 | 21  | 3 | 680    | 1.03  |
| 2661.155 | 17 | Q96AE4       | R.QQAAYYAQT QQAAYYAQTS[ 3        | 0.219  | 0.022    | 0.003     | 0 | 20.55 | 16 | 21  | 1 | 644    | 1.29  |
| 1465.693 | 8  | Q96AP0       | R.EULGSETPSSI EULGSETPSSI[1 2    | -0.485 | 0.009    | 0.002     | 0 | 24.68 | 17 | 25  | 2 | 544    | 1.37  |
| 1692.627 | 15 | Q96AT1       | K.NSSLLSDFNEI NSSLLS[166.99 2    | 2.119  | 1.60E-06 | 0.003     | 0 | 61.71 | 16 | 62  | 4 | 154    | 1.65  |
| 1757.701 | 11 | Q96AT1       | R.IQPPDPDEDG IQPPDPDEDGD 2       | -1.088 | 0.04     | 0.002     | 0 | 18.67 | 17 | 65  | 4 | 154    | 1.36  |
| 2231.978 | 11 | Q96B23       | R.RDSSSEQLAS RDS[166.9984] 2     | -1.124 | 0.039    | 0.002     | 1 | 20.31 | 19 | 48  | 2 | 403    | 0.73  |
| 2231.978 | 19 | Q96B23       | R.RDSSSEQLAS RDS[166.9984 2      | -0.239 | 0.005    | 0.002     | 1 | 29.14 | 19 | 64  | 3 | 403    | 0.73  |
| 1781.686 | 10 | Q96B36       | R.SSDEENPPS SSDEENPPSS[ 2        | 2.159  | 5.00E-06 | 0.003     | 0 | 56.06 | 16 | 56  | 2 | 256    | 1.49  |
| 1032.44  | 8  | Q96B36       | R.LNTSDFOKL LNT[181.014]SI 2     | -0.048 | 0.003    | 5.00E-04  | 0 | 31.06 | 19 | 81  | 2 | 256    | 0.53  |
| 1781.686 | 7  | Q96B36       | R.SSDEENPPS SSDEENPPSS[1 2       | 2.021  | 5.80E-06 | 0.003     | 0 | 55.38 | 16 | 63  | 2 | 256    | 1.49  |
| 1598.735 | 12 | Q96B97       | R.SIEVENDFLV S[166.9984]EV 2     | 1.51   | 1.10E-04 | 0.002     | 0 | 45.65 | 18 | 46  | 2 | 665    | 1.49  |
| 1512.709 | 13 | Q96B97       | R.ANSPSLFGTE ANS[166.9984] 3     | -0.02  | 0.031    | 0.001     | 0 | 20.16 | 18 | 20  | 2 | 665    | 0.81  |
| 1349.463 | 4  | Q96B9E       | K.YDSQKCFNK Y[243.0297]DS 2      | -1.073 | 0.038    | 0.002     | 1 | 15.8  | 14 | 16  | 3 | 2186   | 1.43  |
| 1668.719 | 8  | Q96B9V       | K.SSPVCSAPV SS[166.9984]PA 2     | -1.008 | 0.032    | 0.002     | 0 | 19.47 | 17 | 19  | 4 | 2078</ |       |

|          |    |        |                             |   |        |          |           |   |       |    |     |    |      |       |
|----------|----|--------|-----------------------------|---|--------|----------|-----------|---|-------|----|-----|----|------|-------|
| 1627.703 | 8  | Q96EY5 | R.DMOGLSLDA DMQGLS[166.9    | 2 | -1.047 | 0.033    | -0.002    | 0 | 19.07 | 17 | 19  | 2  | 273  | -1.11 |
| 1769.572 | 12 | Q96RF6 | K.SQDVAVSPQC SQDVAVS[166.4  | 2 | 1.239  | 2.00E-04 | 0.001     | 0 | 42.94 | 18 | 43  | 1  | 508  | 0.67  |
| 1595.721 | 12 | Q96F54 | R.TFLHVSQNSL TFLHVSQNSL[1   | 3 | 0.282  | 0.017    | 0.001     | 0 | 23.16 | 18 | 25  | 5  | 1042 | 0.85  |
| 2104.97  | 7  | Q96FV2 | R.DEVOEVVVFV DEVOEVVVFVPA   | 3 | 0.37   | 0.015    | 0.003     | 0 | 25.02 | 19 | 25  | 1  | 425  | 1.4   |
| 2104.97  | 7  | Q96FV2 | R.DEVOEVVVFV DEVOEVVVFVPA   | 3 | 0.213  | 0.021    | 0.003     | 0 | 23.48 | 19 | 23  | 1  | 425  | 1.4   |
| 2104.97  | 8  | Q96FV2 | R.DEVOEVVVFV DEVOEVVVFVPA   | 3 | 1.256  | 8.00E-04 | 0.003     | 0 | 37.66 | 19 | 38  | 1  | 425  | 1.4   |
| 1866.82  | 13 | Q96FV9 | K.SGLSDLAESLT SGLSDLAESLTN  | 2 | -0.39  | 0.008    | 0.003     | 0 | 26.65 | 18 | 27  | 1  | 657  | 1.55  |
| 2582.074 | 23 | Q96G46 | R.QENCGAQCV QENC[160.030    | 3 | 0.613  | 0.008    | 0.002     | 0 | 26.45 | 18 | 26  | 1  | 650  | 0.72  |
| 2582.074 | 27 | Q96G46 | R.QENCGAQCV QENC[160.030    | 3 | 1.169  | 0.002    | 0.002     | 0 | 32.05 | 18 | 32  | 1  | 650  | 0.72  |
| 2582.074 | 19 | Q96G46 | R.QENCGAQCV QENC[160.030    | 3 | 1.047  | 0.003    | 0.002     | 0 | 30.83 | 18 | 62  | 3  | 650  | 0.72  |
| 2582.074 | 23 | Q96G46 | R.QENCGAQCV QENC[160.030    | 3 | 1.205  | 2.90E-04 | 0.002     | 0 | 40.71 | 18 | 41  | 1  | 650  | 0.72  |
| 2020.682 | 11 | Q96GA3 | K.SENEDDSEWI S[166.9984]E   | 2 | 2.159  | 1.40E-08 | 0.002     | 0 | 78.46 | 13 | 78  | 1  | 475  | 0.89  |
| 2020.682 | 17 | Q96GA3 | K.SENEDDSEWI S[166.9984]E   | 2 | 2.109  | 1.50E-05 | 0.002     | 0 | 48.31 | 13 | 48  | 1  | 475  | 0.94  |
| 1927.792 | 8  | Q96GM8 | M.AADSDDGA AADS[166.9984    | 2 | 2.159  | 9.50E-06 | 0.001     | 0 | 56.07 | 18 | 56  | 1  | 510  | 0.53  |
| 2366.147 | 12 | Q96GU1 | R.GNDQESSQP GNDQESSQPVC     | 2 | 2.119  | 1.70E-05 | 0.001     | 0 | 52.37 | 17 | 88  | 5  | 130  | 0.45  |
| 2195.057 | 11 | Q96GU1 | K.RQEEPPPTDN RQEEPPPTDNQ    | 3 | 0.692  | 0.006    | 0.003     | 1 | 28.24 | 19 | 110 | 5  | 130  | 1.16  |
| 2446.113 | 11 | Q96GU1 | R.GNDQESSQP GNDQESS[166.9   | 3 | 0.029  | 0.032    | 0.003     | 0 | 19.61 | 17 | 110 | 5  | 130  | 1.37  |
| 3120.412 | 8  | Q96GU1 | R.SQSSERGNDC SQSS[166.9984  | 3 | 1.005  | 0.003    | 0.003     | 1 | 30.37 | 18 | 110 | 5  | 130  | 0.89  |
| 3120.412 | 17 | Q96GU1 | R.SQSSERGNDC SQSSERGNDCQ    | 3 | 0.631  | 0.008    | 0.003     | 1 | 26.65 | 18 | 88  | 5  | 130  | 0.89  |
| 2446.113 | 20 | Q96GU1 | R.GNDQESSQP GNDQESS[166.9   | 3 | 0.849  | 0.005    | 0.003     | 0 | 27.83 | 17 | 88  | 5  | 130  | 1.37  |
| 3120.412 | 19 | Q96GU1 | R.SQSSERGNDC SQSSERGNDCQ    | 3 | 1.158  | 0.002    | 0.003     | 1 | 31.93 | 18 | 139 | 6  | 130  | 0.89  |
| 1160.523 | 10 | Q96GV9 | K.SLDYLNLDK.N S[166.9984]L  | 2 | -0.958 | 0.026    | 0.002     | 0 | 21.96 | 19 | 22  | 1  | 206  | 1.41  |
| 1375.56  | 9  | Q96GX5 | R.NFELVDSPCI NFELVDS[166.2  | 2 | -0.532 | 0.01     | 0.003     | 0 | 23.23 | 16 | 23  | 1  | 879  | 1.86  |
| 1285.594 | 8  | Q96GY0 | K.GIEGHSPLGNL GIEGHS[166.99 | 2 | -1.14  | 0.039    | 0.002     | 0 | 20.13 | 19 | 20  | 1  | 325  | 1.77  |
| 2950.266 | 10 | Q96GY3 | R.ERECSSPSP EREC[160.0307   | 3 | 1.291  | 8.60E-04 | 0.002     | 1 | 35.44 | 17 | 35  | 2  | 246  | 0.63  |
| 2950.266 | 18 | Q96GY3 | R.ERECSSPSP EREC[160.0307   | 3 | 1.193  | 9.00E-04 | 0.002     | 1 | 35.23 | 17 | 35  | 2  | 246  | 0.63  |
| 1270.568 | 7  | Q96H55 | R.SNSSEALLVDI S[166.9984]N  | 2 | -0.125 | 0.004    | 0.002     | 0 | 28.3  | 17 | 28  | 1  | 630  | 2     |
| 1900.821 | 9  | Q96HE9 | R.SPTPTPLPLSTS SPTPTPLPLT   | 2 | 0.762  | 5.60E-04 | 0.002     | 0 | 38.16 | 18 | 38  | 3  | 360  | 1.11  |
| 1900.821 | 7  | Q96HE9 | R.SPTPTPLPLSTS SPTPTPLPLT   | 2 | 1.193  | 2.10E-04 | 0.002     | 0 | 42.46 | 18 | 45  | 2  | 360  | 1.11  |
| 1647.789 | 11 | Q96HE9 | K.VDVERSPPGT VVERS[166.99   | 2 | -1.017 | 0.03     | 0.002     | 1 | 21.36 | 19 | 45  | 2  | 360  | 1.13  |
| 2409.039 | 13 | Q96HH9 | K.ACRSPTAQSP AC[160.0307]R  | 3 | -0.195 | 0.047    | -0.002    | 1 | 19.37 | 19 | 19  | 1  | 432  | -1.04 |
| 2282.018 | 11 | Q96HP0 | K.SISSNPDIAV SISS[166.9984  | 2 | 1.944  | 2.60E-05 | 0.002     | 0 | 51.75 | 18 | 52  | 2  | 2047 | 1.1   |
| 2282.018 | 12 | Q96HP0 | K.SISSNPDIAV S[166.9984]S   | 2 | 0.677  | 7.10E-04 | 0.002     | 0 | 37.35 | 18 | 37  | 2  | 2047 | 1.1   |
| 2282.018 | 13 | Q96HP0 | K.SISSNPDIAV SISS[166.9984  | 2 | 2.025  | 3.10E-07 | 0.002     | 0 | 70.98 | 18 | 72  | 4  | 2047 | 1.1   |
| 2025.796 | 14 | Q96HR8 | K.NDQEPPEAL NDQEPPEALD      | 2 | 1.817  | 4.90E-05 | 0.002     | 0 | 47.72 | 17 | 64  | 3  | 494  | 1.05  |
| 1231.608 | 6  | Q96IF1 | R.LEPTAPALSP LEPTAPALS[166  | 2 | 0.629  | 7.20E-04 | 0.002     | 0 | 37.84 | 19 | 38  | 2  | 538  | 1.3   |
| 1529.62  | 12 | Q96IF1 | R.HSVTGYGDCJ HS[166.9984]V  | 2 | -1.052 | 0.034    | 7.00E-04  | 0 | 19.03 | 17 | 29  | 2  | 538  | 0.47  |
| 1547.662 | 9  | Q96J9  | K.DNPPSPQLD DNPS[166.9984   | 2 | 1.325  | 1.60E-04 | 0.002     | 0 | 43.8  | 18 | 44  | 2  | 268  | 1.17  |
| 1703.764 | 10 | Q96J9  | K.DNPPSPQLD DNPS[166.9984   | 2 | -0.773 | 0.02     | 0.001     | 1 | 22.81 | 18 | 65  | 3  | 268  | 0.83  |
| 2366.903 | 15 | Q96J6G | K.DEETEDVLAS DEETEDVLASN    | 2 | 0.762  | 5.00E-04 | 9.00E-04  | 0 | 36.15 | 16 | 36  | 1  | 964  | 0.38  |
| 1591.773 | 8  | Q96JM2 | R.VSPVPLSGAA VS[166.9984]P  | 2 | 0.297  | 0.002    | 0.001     | 0 | 32.52 | 17 | 33  | 1  | 2506 | 0.87  |
| 939.397  | 6  | Q96JM3 | R.GGSPDLWKS GGS[166.9984]2  | 2 | 1.927  | 3.40E-05 | 7.00E-04  | 0 | 47.82 | 16 | 127 | 10 | 812  | 0.78  |
| 2314.113 | 18 | Q96JM3 | K.LAPVSPPEPQ LAPVPS[166.99  | 3 | 1.291  | 0.001    | 0.003     | 0 | 33.33 | 17 | 127 | 10 | 812  | 1.2   |
| 1486.646 | 8  | Q96JM3 | K.TSPASLDFFE TS[166.9984]P  | 2 | 0.448  | 0.001    | 0.002     | 0 | 35.03 | 18 | 112 | 10 | 812  | 1.27  |
| 1614.741 | 10 | Q96JM3 | R.KTSPASLDFFE KTS[166.9984  | 2 | -0.031 | 0.003    | 0.002     | 1 | 31.24 | 19 | 127 | 10 | 812  | 1.01  |
| 1270.656 | 7  | Q96JM3 | R.KPGPPLSPER KPGPPLS[166.9  | 2 | -0.349 | 0.008    | 0.002     | 0 | 26.06 | 17 | 127 | 10 | 812  | 1.43  |
| 1970.877 | 15 | Q96JM3 | R.KPGSPDLWV KPGSP[166.998   | 3 | -0.087 | 0.043    | 0.004     | 1 | 19.47 | 18 | 138 | 12 | 812  | 1.8   |
| 2314.113 | 11 | Q96JM3 | K.LAPVSPPEPQ LAPVPS[166.99  | 3 | 0.559  | 0.01     | 0.003     | 0 | 24.93 | 17 | 138 | 12 | 812  | 1.2   |
| 1614.741 | 10 | Q96JM3 | R.KTSPASLDFFE KTS[166.99    | 2 | 0.506  | 8.90E-04 | 0.002     | 1 | 36.62 | 19 | 130 | 11 | 812  | 1.01  |
| 1614.741 | 8  | Q96JM3 | R.KTSPASLDFFE KTS[181.014]S | 2 | 0.781  | 0.005    | 0.001     | 1 | 29.15 | 19 | 138 | 12 | 812  | 0.88  |
| 2812.104 | 14 | Q96JQ2 | K.HEPHQDSGEI HEPHODS[166.9  | 3 | 1.291  | 6.60E-04 | 0.002     | 0 | 36.58 | 17 | 37  | 3  | 1002 | 0.62  |
| 2198.992 | 11 | Q96JY6 | R.SQATSPGQT SQATSPGQT[16    | 3 | 0.615  | 0.009    | 0.004     | 0 | 26.49 | 18 | 64  | 4  | 352  | 1.59  |
| 2198.992 | 12 | Q96JY6 | R.SQATSPGQT SQATSPGQT[16    | 3 | 0.885  | 0.005    | 0.004     | 0 | 29.17 | 18 | 61  | 5  | 352  | 1.59  |
| 1927.744 | 10 | Q96K21 | R.LPDSDDDEDE LPDS[166.9984  | 2 | 2.159  | 4.00E-09 | 0.001     | 0 | 87.44 | 16 | 149 | 3  | 471  | 0.6   |
| 2396.004 | 16 | Q96K76 | R.ELEQHLOTSI ELEQHLOT[181.3 | 3 | -0.159 | 0.047    | 0.002     | 0 | 17.76 | 17 | 18  | 2  | 1375 | 1.06  |
| 2396.004 | 10 | Q96K76 | R.ELEQHLOTSI ELEQHLOTS[16   | 3 | 0.633  | 0.008    | 0.002     | 0 | 25.68 | 17 | 26  | 2  | 1375 | 1.06  |
| 1161.545 | 6  | Q96K85 | R.GLSHSPWAVI GLSHS[166.998  | 2 | -0.49  | 0.009    | 0.001     | 0 | 26.63 | 19 | 27  | 1  | 322  | 0.93  |
| 3113.245 | 18 | Q96K8C | R.EDAEGVAEEI EDAEGVAEEEE    | 3 | 1.291  | 1.70E-06 | 5.00E-04  | 0 | 64.26 | 19 | 64  | 1  | 554  | -0.15 |
| 2894.273 | 19 | Q96KM6 | R.SEHTAPPEEI SEHTAPPEEPT    | 3 | 0.718  | 0.006    | 9.00E-04  | 1 | 29.54 | 20 | 49  | 2  | 892  | 0.3   |
| 1378.589 | 7  | Q96KM6 | K.SPEADPLGV S[166.9984]PE   | 2 | 0.852  | 4.50E-04 | 0.002     | 0 | 38.1  | 17 | 49  | 2  | 892  | 1.39  |
| 2894.273 | 19 | Q96KM6 | R.SEHTAPPEEI SEHTAPPEEPT    | 3 | 0.602  | 0.007    | 0.003     | 1 | 28.5  | 20 | 28  | 3  | 892  | 0.99  |
| 941.449  | 4  | Q96KN1 | K.LTHLSYK E LTHLS[166.998   | 2 | -0.844 | 0.02     | 8.00E-04  | 0 | 23.1  | 19 | 23  | 1  | 310  | 0.87  |
| 2408.04  | 17 | Q96KN1 | R.TTPPPRPPA TT[181.014]P    | 3 | 0.096  | 0.025    | 0.002     | 0 | 22.3  | 19 | 22  | 2  | 310  | 0.63  |
| 2826.319 | 12 | Q96KQ4 | K.EPEQDGPAAI EPEQDGPAAAP    | 3 | 0.598  | 0.009    | 0.004     | 0 | 25.3  | 17 | 25  | 3  | 1090 | 1.38  |
| 2826.319 | 14 | Q96KQ4 | K.EPEQDGPAAI EPEQDGPAAAP    | 3 | 1.101  | 0.002    | 0.004     | 0 | 33.1  | 17 | 33  | 3  | 1090 | 1.38  |
| 1526.685 | 10 | Q96KQ7 | K.LNSGGGLSEE LNS[166.9984   | 2 | 2.159  | 3.20E-07 | 0.002     | 0 | 70.22 | 18 | 70  | 1  | 1210 | 1.17  |
| 1561.617 | 9  | Q96KR1 | R.RDSGDVDFE RDS[166.9984]2  | 2 | 2.172  | 1.70E-05 | 0.001     | 1 | 53.77 | 18 | 70  | 2  | 1074 | 0.88  |
| 1405.516 | 8  | Q96KR1 | R.DSDGVDGFE DS[166.9984]D   | 2 | 0.136  | 0.002    | 0.002     | 0 | 26.91 | 13 | 57  | 2  | 1074 | 1.2   |
| 1558.69  | 14 | Q96L73 | R.AASPHQVTPC AAS[166.9984   | 2 | -0.825 | 0.021    | 0.003     | 0 | 22.29 | 18 | 22  | 2  | 2696 | 1.79  |
| 2101.783 | 17 | Q96LA8 | K.LESGGGGEGE LESGGGGEGEGE   | 2 | 2.159  | 8.00E-09 | 0.005     | 0 | 83.41 | 15 | 120 | 2  | 375  | 2.64  |
| 1521.71  | 8  | Q96LD4 | R.GGIPASPIDPF GGIPAS[166.99 | 2 | -0.617 | 0.014    | 0.002     | 0 | 24.38 | 18 | 24  | 1  | 638  | 1.56  |
| 1604.681 | 7  | Q96MG7 | R.GPGGSQGSQ GPGGSQGSQGI     | 2 | -0.139 | 0.004    | 0.003     | 0 | 30.16 | 19 | 30  | 1  | 304  | 1.62  |
| 1604.681 | 8  | Q96MG7 | R.GPGGSQGSQ GPGGSQGSQGI     | 2 | -1.218 | 0.047    | 0.003     | 0 | 19.35 | 19 | 19  | 1  | 304  | 1.62  |
| 1583.688 | 8  | Q96MH2 | R.TQSPGGCSAI TQS[166.9984   | 2 | 1.63   | 7.00E-05 | 0.002     | 0 | 47.85 | 19 | 48  | 1  | 286  | 0.99  |
| 1554.727 | 7  | Q96MT3 | K.SRSNDAIIV SRS[166.9984]C  | 3 | 0.805  | 0.005    | 0.002     | 1 | 26.42 | 16 | 26  | 2  | 831  | 1.2   |
| 1083.523 | 7  | Q96MU7 | R.GSIPVFD.RS GIS[166.9984]F | 2 | 1.987  | 3.00E-05 | 0.002     | 0 | 50.42 | 18 | 50  | 1  | 727  | 1.54  |
| 2275.949 | 13 | Q96MW1 | K.AALLAQYADV AALLAQYADVT    | 2 | 2.197  | 6.30E-10 | 0.001     | 0 | 97.83 | 18 | 98  | 2  | 224  | 0.52  |
| 1564.678 | 9  | Q96N64 | R.SPEAVGPELE S[166.9984]PE  | 2 | -0.945 | 0.026    | 0.002     | 0 | 21.1  | 18 | 35  | 3  | 755  | 1.1   |
| 1759.772 | 18 | Q96N66 | R.AGGGPTLQCI AGGGPTLQCI[1   | 2 | -0.935 | 0.026    | -2.00E-04 | 0 | 20.2  | 17 | 20  | 1  | 472  | -0.1  |
| 1759.772 | 5  | Q96N66 | R.AGGGPTLQCI AGGGPTLQCI[1   | 2 | -1.045 | 0.034    | -2.00E-04 | 0 | 19.08 | 17 | 19  | 1  | 472  | -0.1  |
| 1226.52  | 13 | Q96N67 | R.SNSVWVTGCS SNS[166.9984   | 2 | -0.625 | 0.012    | -4.00E-04 | 0 | 25.3  | 19 | 68  | 3  | 2140 | -0.36 |
| 2267.966 | 13 | Q96N67 | R.SLSNSPDISC SLSNSPDISGT    | 2 | 2.159  | 2.60E-06 | 6.00E-04  | 0 | 61.69 | 18 | 68  | 3  | 2140 | 0.29  |
| 2267.966 | 12 | Q96N67 | R.SLSNSPDISC SLSNSPDISGT    | 2 | 1.944  | 7.10E-07 | 6.00E-04  | 0 | 67.37 | 18 | 67  | 4  | 2140 | 0.29  |
| 2267.966 | 12 | Q96N67 | R.SLSNSPDISC SLSNSPDISGT    | 2 | 0.893  | 0.004    | 0.006     | 1 | 30.28 | 19 | 84  | 5  | 2140 | 2.27  |
| 2267.966 | 13 | Q96N67 | R.SLSNSPDISC SLSNSPDIS[16   | 2 | 2.197  | 6.60E-07 | 6.00E-04  | 0 | 67    |    |     |    |      |       |



|          |    |        |                               |   |        |          |          |   |       |    |     |    |      |       |
|----------|----|--------|-------------------------------|---|--------|----------|----------|---|-------|----|-----|----|------|-------|
| 1989.796 | 20 | Q96QE3 | K.AADVPVPSFDE AADVPVPSFDES    | 2 | 0.775  | 5.20E-04 | 0.002    | 0 | 37.29 | 17 | 37  | 3  | 1844 | 0.76  |
| 1989.796 | 15 | Q96QE3 | K.AADVPVPSFDE AADVPVPSFDES    | 2 | 0.573  | 8.30E-04 | 0.002    | 0 | 35.26 | 17 | 42  | 5  | 1844 | 0.76  |
| 1931.677 | 12 | Q96Q0R | R.RGGGSGGGE RGGGSGGGE         | 1 | 0.073  | 2.00E-02 | 0.002    | 1 | 26.28 | 13 | 74  | 2  | 312  | 0.91  |
| 1024.507 | 5  | Q96R0  | R.TQSLALPK E TQS[166.9984]    | 2 | -0.656 | 0.016    | 7.00E-04 | 0 | 25.97 | 20 | 26  | 2  | 1608 | 0.66  |
| 1456.56  | 9  | Q96R1  | R.VPSPGMEEA VPS[166.9984]     | 2 | 1.573  | 8.40E-05 | 0.002    | 0 | 45.28 | 17 | 41  | 1  | 719  | 1.35  |
| 2550.046 | 17 | Q96R50 | R.NGGTNEESN NGGTNEESNS        | 3 | 0.852  | 0.005    | 0.005    | 0 | 27.86 | 17 | 75  | 3  | 853  | 1.82  |
| 3098.107 | 15 | Q96R50 | R.DSGNNSGDD DSGNNS[166.9      | 3 | 1.291  | 1.50E-07 | 0.004    | 0 | 70.41 | 15 | 82  | 4  | 853  | 1.3   |
| 2697.106 | 16 | Q96R50 | K.DRPHASGTD DRPHASGT[181.4    | 2 | 0.771  | 0.006    | 0.003    | 0 | 27.28 | 17 | 82  | 4  | 853  | 1.22  |
| 2697.106 | 12 | Q96R50 | K.DRPHASGTD DRPHASGTDG        | 4 | 1.192  | 0.002    | 0.003    | 0 | 31.49 | 17 | 70  | 3  | 853  | 1.22  |
| 1466.671 | 6  | Q96RT1 | K.SHSITNMEIG SHS[166.9984]    | 2 | -1.064 | 0.033    | 0.003    | 0 | 18.91 | 17 | 19  | 1  | 1412 | 2.13  |
| 2117.939 | 11 | Q96S44 | R.ATTPADGEEF ATT[181.014]P    | 2 | -0.963 | 0.027    | 0.004    | 0 | 20.91 | 18 | 21  | 1  | 253  | 1.74  |
| 1070.524 | 10 | Q96S55 | R.RLESSALK.Q RLS[166.9984]    | 2 | -0.5   | 0.009    | 0.001    | 1 | 25.55 | 18 | 26  | 2  | 665  | 0.91  |
| 1070.524 | 11 | Q96S55 | R.RLESSALK.Q RLS[166.9984]    | 2 | -0.612 | 0.012    | 0.001    | 1 | 24.43 | 18 | 24  | 3  | 665  | 0.91  |
| 2773.059 | 13 | Q96S55 | K.QPATPTAAES QPATPT[181.01    | 3 | 0.003  | 0.032    | 0.002    | 0 | 20.39 | 18 | 21  | 4  | 665  | 0.65  |
| 2773.059 | 18 | Q96S55 | K.QPATPTAAES QPATPTAAESS      | 3 | 0.387  | 0.013    | 0.002    | 0 | 24.2  | 18 | 28  | 3  | 665  | 0.65  |
| 1677.784 | 10 | Q96S83 | R.ASSLNENVDI ASS[166.9984]    | 2 | 0.973  | 3.10E-04 | 8.00E-04 | 0 | 41.27 | 19 | 41  | 4  | 815  | 0.47  |
| 1161.482 | 7  | Q96S83 | R.FNGSTEALDK FNGS[166.9984]   | 2 | -1.171 | 0.042    | 0.001    | 0 | 19.82 | 19 | 20  | 4  | 815  | 1.17  |
| 2397.779 | 8  | Q96S72 | K.GEDTEMQNC GEDTEMQNS         | 3 | 0.291  | 0.015    | 0.003    | 0 | 18.23 | 13 | 73  | 4  | 819  | 1.42  |
| 1562.673 | 6  | Q96S72 | K.HPASDEIEEL HPAS[166.9984]   | 2 | -0.639 | 0.012    | 0.002    | 0 | 24.16 | 18 | 24  | 4  | 819  | 1.05  |
| 1401.517 | 11 | Q96S72 | K.GPASDSEID GPAS[166.9984]    | 2 | 0.557  | 9.10E-04 | 0.002    | 0 | 34.12 | 16 | 34  | 4  | 819  | 1.39  |
| 2397.779 | 11 | Q96S72 | K.GEDTEMQNC GEDTEMQNS         | 3 | -0.188 | 0.045    | 0.003    | 0 | 13.47 | 13 | 19  | 3  | 819  | 1.42  |
| 1880.721 | 13 | Q96S72 | R.HQASDSENEI HQAS[166.9984]   | 3 | -0.112 | 0.043    | 0.003    | 0 | 17.24 | 16 | 20  | 4  | 819  | 1.42  |
| 2317.812 | 11 | Q96S72 | K.GEDTEMQNC GEDTEMQNS         | 3 | 0.367  | 0.014    | 0.003    | 0 | 20    | 14 | 77  | 7  | 819  | 1.18  |
| 1800.755 | 15 | Q96S72 | R.HQASDSENEI HQASD[166.99     | 3 | 0.126  | 0.027    | 0.005    | 0 | 21.59 | 18 | 77  | 7  | 819  | 2.61  |
| 1800.755 | 8  | Q96S72 | R.HQASDSENEI HQAS[166.9984]   | 3 | 0.272  | 0.019    | 0.005    | 0 | 23.06 | 18 | 34  | 5  | 819  | 2.61  |
| 1493.598 | 5  | Q96S73 | R.YMNSDTPSP YMNSDTPS[166      | 2 | 0.533  | 8.70E-04 | 0.003    | 0 | 35.88 | 18 | 36  | 3  | 1273 | 1.76  |
| 1719.663 | 10 | Q96T23 | R.IESDEEDEFEN IES[166.9984]   | 2 | 2.159  | 1.80E-08 | 0.002    | 0 | 81.73 | 17 | 161 | 9  | 1441 | 1.3   |
| 1658.815 | 6  | Q96T23 | K.DAQRSLPIPE DAQRSL[166.99    | 2 | 1.447  | 1.10E-04 | 0.002    | 1 | 45.02 | 18 | 161 | 9  | 1441 | 1.33  |
| 2437.92  | 12 | Q96T23 | R.IETDEEESCDI IET[181.014]D   | 2 | 1.538  | 9.50E-05 | 0.005    | 0 | 43.93 | 16 | 184 | 11 | 1441 | 1.94  |
| 2446.984 | 21 | Q96T23 | K.NSSQQDNSSF NSSQQDNSSRE      | 3 | 1.127  | 0.002    | 5.00E-04 | 1 | 30.61 | 17 | 184 | 11 | 1441 | 0.19  |
| 3090.361 | 21 | Q96T23 | K.STLESEKPGSP STLESEKPGS[16   | 3 | 1.291  | 0.002    | 0.002    | 0 | 32.23 | 17 | 161 | 9  | 1441 | 0.68  |
| 3170.327 | 18 | Q96T23 | K.STLESEKPGSP STLESEKPGS[16   | 3 | -0.002 | 0.033    | 0.004    | 0 | 19.32 | 17 | 172 | 8  | 1441 | 1.2   |
| 2517.886 | 13 | Q96T23 | R.IETDEEESCDI IET[181.014]D   | 2 | -0.078 | 0.04     | 0.002    | 0 | 15.57 | 14 | 149 | 9  | 1441 | 0.91  |
| 3090.361 | 19 | Q96T23 | K.STLESEKPGSP STLES[166.9984] | 3 | -0.182 | 0.044    | 0.004    | 0 | 18.84 | 18 | 146 | 7  | 1441 | 1.46  |
| 1228.572 | 10 | Q96T37 | R.SLSPGGAALG SLS[166.9984]    | 2 | 1.269  | 1.60E-04 | 0.002    | 0 | 43.24 | 18 | 66  | 7  | 977  | 1.34  |
| 1942.751 | 7  | Q96T37 | R.HCAPSPDRSP HC[160.0307]A    | 2 | 0.771  | 4.80E-04 | -0.001   | 1 | 37.26 | 17 | 66  | 7  | 977  | -0.67 |
| 1084.457 | 4  | Q96T37 | R.RDGVWSLDR L RDGWS[166.99    | 2 | -1.144 | 0.043    | 0.001    | 1 | 20.11 | 19 | 59  | 8  | 977  | 1.07  |
| 1544.697 | 7  | Q96T37 | R.HLDRSPESDR HLDRS[166.998    | 3 | -0.005 | 0.037    | 0.002    | 1 | 19.3  | 17 | 65  | 6  | 977  | 1.09  |
| 1210.598 | 5  | Q96T37 | R.DRTPPLLYR.D DRT[181.014]P   | 2 | -1.071 | 0.039    | 0.001    | 1 | 19.84 | 18 | 83  | 7  | 977  | 1.1   |
| 1627.662 | 9  | Q96T58 | R.RPQSPGASPS RPOS[166.9984]   | 2 | -0.939 | 0.026    | 0.003    | 0 | 22.16 | 19 | 67  | 12 | 3664 | 1.6   |
| 1766.784 | 11 | Q96T58 | K.EDVVASGSP EDVVASGSP[16      | 2 | 1.096  | 2.20E-04 | 0.001    | 0 | 42.51 | 19 | 110 | 15 | 3664 | 0.57  |
| 1759.707 | 11 | Q96T58 | R.HGSHFHEDEF HGS[166.9984]    | 3 | 1.291  | 3.90E-04 | 0.002    | 0 | 39.49 | 18 | 110 | 15 | 3664 | 0.99  |
| 2312.801 | 16 | Q96T58 | R.SLVHEVGKPP SLVHEVGKPPQ      | 3 | 0.024  | 0.03     | 0.002    | 0 | 20.56 | 18 | 110 | 15 | 3664 | 0.9   |
| 1181.545 | 5  | Q96T58 | R.ESGVAVVSP ESVGAVVAVS[166    | 2 | -1.023 | 0.033    | 0.002    | 0 | 20.32 | 18 | 110 | 15 | 3664 | 1.31  |
| 1839.673 | 5  | Q96T58 | R.HGSHFHEDEF HGS[166.9984]    | 3 | 0.244  | 0.018    | 0.001    | 0 | 20.8  | 16 | 58  | 12 | 3664 | 0.77  |
| 2202.98  | 18 | Q96T60 | R.TPESQDTPP TPESQDTP[181.2    | 2 | 0.313  | 0.002    | 5.00E-04 | 0 | 34.68 | 19 | 35  | 2  | 521  | 0.22  |
| 2202.98  | 10 | Q96T60 | R.TPESQDTPP TPESQDTPPPG       | 2 | -0.319 | 0.007    | 5.00E-04 | 0 | 28.37 | 19 | 28  | 2  | 521  | 0.22  |
| 1115.462 | 5  | Q96T83 | K.SSSEVLER.D SS[166.9984]SE   | 2 | -0.12  | 0.004    | 0.001    | 0 | 29.35 | 18 | 29  | 2  | 725  | 1.26  |
| 1115.462 | 5  | Q96T83 | K.SSSEVLER.D SS[166.9984]E    | 2 | 0.612  | 7.10E-04 | 0.001    | 0 | 36.66 | 18 | 29  | 2  | 725  | 1.26  |
| 971.427  | 4  | Q96T83 | K.IMGQLSDK.F IMGQLS[166.99    | 2 | -1.215 | 0.048    | 7.00E-04 | 0 | 13.39 | 13 | 35  | 2  | 725  | 0.68  |
| 2474.988 | 27 | Q96T88 | K.ERDESELDI ERDESELDTDSG      | 3 | 0.149  | 0.023    | 0        | 1 | 19.81 | 16 | 54  | 5  | 793  | -0.01 |
| 2554.955 | 10 | Q96T88 | K.ERDESELDI ERDESELDT[18:3    | 3 | 1.224  | 3.90E-04 | 0.002    | 1 | 35.09 | 13 | 68  | 4  | 793  | 0.57  |
| 1864.808 | 11 | Q96T88 | K.IERPGESEPM IERPGESE[166.3   | 3 | 0.095  | 0.026    | 0.003    | 0 | 22.27 | 19 | 54  | 5  | 793  | 1.39  |
| 2554.955 | 19 | Q96T88 | K.ERDESELDI ERDS[166.9984]    | 3 | 0.074  | 0.03     | 0.002    | 1 | 16.09 | 13 | 47  | 5  | 793  | 0.85  |
| 2554.955 | 8  | Q96T88 | K.ERDESELDI ERDESELD[166.9    | 2 | 1.062  | 2.90E-04 | 0.005    | 1 | 36.15 | 13 | 90  | 6  | 793  | 2.02  |
| 1828.75  | 10 | Q96T88 | K.REEEQQEQE REEQEQEQGGF       | 3 | 0.243  | 0.019    | 4.00E-04 | 1 | 22.77 | 18 | 90  | 10 | 793  | 0.21  |
| 2127.988 | 10 | Q96TA1 | K.AAPEASSPPA APEASS[166.5     | 2 | 0.477  | 9.80E-04 | 0.002    | 0 | 36.32 | 19 | 36  | 2  | 746  | 1.12  |
| 2127.988 | 17 | Q96TA1 | K.AAPEASSPPA APEASS[166.99    | 2 | 0.752  | 5.20E-04 | 0.002    | 0 | 39.07 | 19 | 40  | 2  | 746  | 1.12  |
| 2045.881 | 9  | Q96TC7 | R.SQSLPNSLDYI SOS[166.9984]   | 2 | 1.126  | 2.20E-04 | 0.001    | 0 | 42.81 | 19 | 43  | 1  | 470  | 0.61  |
| 2045.881 | 12 | Q96TC7 | R.SQSLPNSLDYI S[166.9984]SI   | 2 | 2.021  | 2.40E-05 | 0.001    | 0 | 52.36 | 19 | 52  | 1  | 470  | 0.61  |
| 1831.732 | 9  | Q99442 | R.SQHSSGNGN SQHS[166.9984]    | 3 | 0.642  | 0.007    | 0.002    | 0 | 24.76 | 16 | 42  | 2  | 399  | 0.84  |
| 3034.079 | 15 | Q99442 | K.EELEQQTGDI EELEQQT[181.0    | 3 | 1.224  | 9.40E-04 | 0.002    | 0 | 32.84 | 15 | 42  | 2  | 399  | 0.61  |
| 1831.732 | 17 | Q99442 | R.SQHSSGNGN SQHS[166.998      | 3 | 1.256  | 0.002    | 0.002    | 0 | 31.09 | 16 | 98  | 3  | 399  | 0.84  |
| 1831.732 | 9  | Q99442 | R.SQHSSGNGN S[166.9984]QH     | 2 | 0.15   | 0.002    | 0.002    | 0 | 30.03 | 16 | 43  | 4  | 399  | 1.06  |
| 2171.916 | 16 | Q99459 | K.GGLNTPLHES GGLNT[181.01:3   | 3 | -0.008 | 0.031    | 0.003    | 0 | 21.27 | 19 | 21  | 3  | 802  | 1.49  |
| 2171.916 | 8  | Q99459 | K.GGLNTPLHES GGLNTPLHES       | 3 | 0.854  | 0.004    | 0.003    | 0 | 29.89 | 19 | 30  | 1  | 802  | 1.49  |
| 1531.731 | 8  | Q99497 | R.DVVICPDASLI DVVIC[160.030   | 2 | -0.008 | 0.003    | 0.002    | 0 | 30.47 | 18 | 30  | 1  | 189  | 1.21  |
| 2165.909 | 14 | Q99501 | R.RYSGDSOSSA RYS[166.9984]    | 3 | 0.01   | 0.031    | 0.002    | 1 | 20.44 | 18 | 20  | 1  | 681  | 1.06  |
| 2165.909 | 22 | Q99501 | R.RYSGDSOSSA RY[243.0297]S    | 3 | -0.119 | 0.042    | 0.002    | 1 | 19.13 | 18 | 19  | 1  | 681  | 1.06  |
| 1418.583 | 9  | Q99543 | R.NASASFQELE NAS[166.9984]    | 2 | 1.802  | 5.30E-05 | 0.002    | 0 | 46.55 | 16 | 87  | 3  | 621  | 1.27  |
| 1546.678 | 6  | Q99543 | R.NASASFQELE NAS[166.9984]    | 2 | 1.859  | 4.60E-05 | 0.002    | 1 | 50.14 | 19 | 84  | 2  | 621  | 1.39  |
| 1498.55  | 6  | Q99543 | R.NASASFQELE NAS[166.9984]    | 2 | -0.913 | 0.023    | 0.002    | 0 | 18.41 | 15 | 91  | 3  | 621  | 1.32  |
| 1417.552 | 8  | Q99549 | R.GLWSTDSAEI GLWSTDS[166.2    | 2 | 2.159  | 4.80E-06 | 5.00E-04 | 0 | 56.16 | 16 | 158 | 3  | 860  | 0.37  |
| 2238.86  | 18 | Q99549 | R.GAEAFGDSAEI GAEAFGDS[166    | 2 | 2.159  | 2.90E-06 | 0.002    | 0 | 59.01 | 16 | 158 | 3  | 860  | 0.66  |
| 1323.583 | 6  | Q99567 | R.EDVEVAESPI EDVEVAES[166     | 2 | 0.851  | 4.60E-04 | 0.002    | 0 | 39.06 | 18 | 39  | 1  | 741  | 1.23  |
| 1495.679 | 10 | Q99569 | R.VASPSQGVQI VASPSQGVGS       | 2 | 0.693  | 6.00E-04 | 0.001    | 0 | 38.48 | 19 | 38  | 4  | 1192 | 0.92  |
| 1834.874 | 10 | Q99569 | R.SAVSPDLHITP SAVS[166.9984]  | 3 | -0.108 | 0.04     | 0.002    | 0 | 18.28 | 17 | 36  | 6  | 1192 | 1.21  |
| 1438.694 | 9  | Q99569 | R.VGSPDLTDAI VGS[166.9984]    | 2 | -0.125 | 0.005    | -0.001   | 0 | 29.28 | 18 | 52  | 5  | 1192 | -0.8  |
| 1742.763 | 12 | Q99575 | R.VQAYEPPSVA VQAYEPPSVA       | 2 | 2.172  | 2.40E-06 | 0.001    | 0 | 61.55 | 18 | 98  | 2  | 1024 | 0.77  |
| 1792.819 | 13 | Q99575 | K.SAVCIADPLPI SAVC[160.0307   | 2 | 0.631  | 7.30E-04 | 0.003    | 0 | 37.86 | 19 | 83  | 3  | 1024 | 1.85  |
| 907.525  | 8  | Q99575 | K.NLLEKYR NLLEKY              | 2 | -0.978 | 0.028    | 5.00E-04 | 1 | 19.77 | 17 | 83  | 3  | 1024 | 0.55  |
| 1246.572 | 5  | Q99584 | R.KDLSVNEFK KDS[166.9984]     | 2 | -0.447 | 0.009    | 8.00E-04 | 1 | 26.07 | 18 | 26  | 1  | 98   | 0.65  |
| 1939.89  | 14 | Q99590 | K.VETVSPSESI VETVSPQS[166.3   | 3 | -0.073 | 0.035    | 0.003    | 1 | 20.59 | 19 | 125 | 9  | 1463 | 1.5   |
| 2405.971 | 13 | Q99590 | K.SSSNDSVDEE SSSNDS[166.99    | 2 | 2.119  | 2.80E-07 | 0.003    | 0 | 71.33 | 18 | 109 | 7  | 1463 | 1.06  |
| 1548     |    |        |                               |   |        |          |          |   |       |    |     |    |      |       |

|          |    |              |                              |        |          |           |   |       |    |     |   |      |       |
|----------|----|--------------|------------------------------|--------|----------|-----------|---|-------|----|-----|---|------|-------|
| 2171.844 | 17 | Q9BPX3       | K.TLHCEGTEIN TLHC[160.0307   | 0.85   | 0.005    | 0.002     | 0 | 27.82 | 17 | 84  | 4 | 1015 | 0.67  |
| 2584.969 | 13 | Q9BPX3       | R.CQTAEADSE[160.0307]QT      | 0.313  | 0.015    | 0.003     | 0 | 19.45 | 14 | 84  | 4 | 1015 | 1.16  |
| 2584.969 | 18 | Q9BPX3       | R.CQTAEADSE[160.0307]QT      | 0.661  | 0.007    | 0.003     | 0 | 22.96 | 14 | 93  | 5 | 1015 | 1.16  |
| 924.386  | 5  | Q9BPZ7       | R.TSFSFOK.E TS[166.9984]FS   | -0.898 | 0.022    | 8.00E-04  | 0 | 16.56 | 13 | 21  | 4 | 522  | 0.89  |
| 1080.487 | 6  | Q9BPZ7       | R.TSFSFOK.E RTSFS[166.998    | -1.006 | 0.029    | 0.001     | 1 | 19.48 | 17 | 21  | 4 | 522  | 1.22  |
| 1186.55  | 9  | Q9BQ61       | K.GGPGSTLSFV GGPGSTLS[166    | 0.246  | 0.002    | 0.002     | 0 | 32.99 | 18 | 33  | 1 | 176  | 1.35  |
| 1452.761 | 12 | Q9BQA1       | R.KETPPPLVPPY KET[181.014]P  | -0.974 | 0.03     | 0.002     | 1 | 18.79 | 16 | 19  | 1 | 342  | 1.44  |
| 1428.606 | 9  | Q9BQA1       | K.DSVFLSCEDN DSVFLSC[160.0   | 0.135  | 0.002    | 0.002     | 0 | 30.89 | 17 | 31  | 2 | 342  | 1.13  |
| 838.375  | 4  | Q9BQA9       | K.TFSLYK.K TFS[166.9984]L    | -0.965 | 0.026    | 0.002     | 0 | 17.9  | 15 | 18  | 1 | 187  | 1.99  |
| 2158.713 | 11 | Q9BQE3       | K.DYEEVGADSA DYEEVGADSA[1    | 2.159  | 1.30E-05 | 6.00E-04  | 0 | 49.55 | 13 | 87  | 4 | 449  | 0.28  |
| 2078.747 | 13 | Q9BQE3       | K.DYEEVGADSA DYEEVGADSA[2    | 0.534  | 9.40E-04 | 0.002     | 0 | 31.89 | 14 | 87  | 4 | 449  | 0.78  |
| 1824.985 | 5  | Q9BQE3_P6836 | K.VGINYQPPTV VGINYQPPTV[1    | -0.572 | 0.012    | 0.002     | 0 | 21.84 | 15 | 116 |   | 1.35 |       |
| 906.424  | 6  | Q9BQE3_P6836 | R.EDMAALEK.D EDMAALEK        | -0.626 | 0.014    | 9.00E-04  | 0 | 21.29 | 15 | 87  |   | 1.02 |       |
| 2087.859 | 10 | Q9BQE3_P6836 | K.TIGGGDDSPN TIGGGDDSP[16    | -0.143 | 0.005    | 9.00E-04  | 0 | 28.12 | 17 | 87  |   | 0.43 |       |
| 1015.578 | 7  | Q9BQE3_P6836 | K.DVNAAIATK.D DVNAAIATK      | 1.026  | 3.10E-04 | 7.00E-04  | 0 | 41.81 | 19 | 64  |   | 0.68 |       |
| 1865.853 | 16 | Q9BQE4       | K.KPQEEDESPGP KPQEEDE[166.5  | -0.153 | 0.046    | 0.001     | 0 | 19.79 | 19 | 20  | 2 | 189  | 0.69  |
| 2828.201 | 15 | Q9BQE9       | K.VDSSTNSSPSV VDSSTNSSPSPC   | 1.291  | 7.40E-04 | 0.002     | 0 | 36.09 | 17 | 60  | 2 | 202  | 0.58  |
| 2908.167 | 13 | Q9BQE9       | K.VDSSTNSSPSV VDSSTNSSPSPC   | 0.659  | 0.007    | 0.002     | 0 | 24.93 | 16 | 48  | 2 | 202  | 0.73  |
| 2908.167 | 13 | Q9BQE9       | K.VDSSTNSSPSV VDSSTNSSPSPC   | 0.987  | 0.003    | 0.002     | 0 | 28.23 | 16 | 53  | 2 | 202  | 0.73  |
| 2908.167 | 15 | Q9BQE9       | K.VDSSTNSSPSV VDSSTNSSPSPC   | 0.913  | 0.004    | 0.002     | 0 | 27.47 | 16 | 65  | 2 | 202  | 0.73  |
| 2828.201 | 16 | Q9BQE9       | K.VDSSTNSSPSV VDSSTNSSPSPC   | 1.393  | 1.10E-06 | 0.002     | 0 | 64.53 | 17 | 78  | 2 | 202  | 0.58  |
| 1337.635 | 7  | Q9BQGO       | K.EIPSATQSPSI EIPSATQ[166.1  | 0.445  | 0.001    | 0.002     | 0 | 36.3  | 19 | 36  | 3 | 1328 | 1.56  |
| 1294.486 | 6  | Q9BRDO       | R.HDTPDPSPLR HDT[181.014]P   | -0.613 | 0.013    | 0.001     | 0 | 20.4  | 14 | 84  | 6 | 619  | 0.88  |
| 1431.583 | 6  | Q9BRDO       | K.YEYDPDISPPR YEYDPDIS[166.1 | -0.104 | 0.004    | 0.002     | 0 | 26.51 | 15 | 68  | 9 | 619  | 1.07  |
| 1861.848 | 11 | Q9BRDO       | R.HDSPDLAPNV HDS[166.9984]   | 0.709  | 6.00E-04 | 0.002     | 0 | 37.62 | 18 | 84  | 6 | 619  | 1.18  |
| 1861.848 | 6  | Q9BRDO       | R.HDSPDLAPNV HDS[166.9984]   | 0.83   | 0.005    | 0.003     | 0 | 28.65 | 18 | 105 | 7 | 619  | 1.45  |
| 1039.507 | 6  | Q9BRG2       | R.TSSDPVLLK.A TSS[166.9984]  | 0.353  | 0.001    | 5.00E-04  | 0 | 35.08 | 19 | 69  | 2 | 576  | 0.47  |
| 1505.598 | 10 | Q9BRG2       | R.SFSEDTLMDG SFS[166.9984]   | 1.846  | 4.70E-05 | 0.002     | 0 | 47.01 | 16 | 61  | 2 | 576  | 1.34  |
| 1590.668 | 17 | Q9BRJ6       | R.ELDEEGSDPP ELDEEGS[166.9   | -0.294 | 0.006    | 0.002     | 0 | 26.61 | 17 | 33  | 2 | 194  | 1.19  |
| 2372.113 | 16 | Q9BRJ6       | K.GEAVLRPGID GEAVLRPGID.A    | 0.355  | 0.013    | 0.002     | 0 | 24.87 | 19 | 33  | 2 | 194  | 0.84  |
| 1418.631 | 6  | Q9BRQO       | R.GGGTPDANS GGGT[181.014     | -0.082 | 0.004    | 0.002     | 0 | 30.73 | 19 | 31  | 1 | 406  | 1.02  |
| 1917.75  | 10 | Q9BR82       | R.VVPGQFDDAI VVPGQFDDA[5     | 1.239  | 2.00E-04 | 0.001     | 0 | 40.94 | 16 | 41  | 1 | 568  | 0.51  |
| 1917.75  | 10 | Q9BR82       | R.VVPGQFDDAI VVPGQFDDA[5     | -0.332 | 0.007    | 0.001     | 0 | 25.23 | 16 | 25  | 2 | 568  | 0.51  |
| 1521.658 | 6  | Q9BSJ6       | R.SLQHQEQLD S[166.9984]LQ    | -1.085 | 0.038    | 0.002     | 0 | 19.68 | 18 | 20  | 1 | 248  | 1.08  |
| 1045.471 | 9  | Q9BSQ5       | R.GITDSFGR.H GITDS[166.998   | -1.043 | 0.032    | 0.001     | 0 | 23.12 | 21 | 23  | 1 | 444  | 1.05  |
| 1973.845 | 9  | Q9BSV6       | K.LEQASGASSI LEQASGASSI[1    | -0.284 | 0.006    | 0.004     | 0 | 26.74 | 17 | 27  | 1 | 310  | 1.75  |
| 1499.678 | 14 | Q9BTC0       | R.SPPEGDTLFI S[166.9984]PPI  | 0.471  | 0.001    | -2.00E-04 | 0 | 35.26 | 18 | 54  | 2 | 2240 | -0.11 |
| 2614.298 | 26 | Q9BTC0       | R.RNSVERPAEP RNS[166.9984]   | 1.101  | 0.003    | 0.002     | 1 | 30.59 | 17 | 31  | 1 | 2240 | 0.79  |
| 1421.667 | 22 | Q9BT7        | K.SPGVAAAVAI S[166.9984]PG   | 0.826  | 4.60E-04 | 0.002     | 0 | 39.81 | 19 | 40  | 1 | 237  | 1.35  |
| 915.515  | 5  | Q9BTFO       | K.NLLELDAK.K NLELDAK         | -1.004 | 0.032    | 6.00E-04  | 0 | 20.51 | 18 | 21  | 1 | 503  | 0.61  |
| 2022.906 | 7  | Q9BTK6       | R.DFLSDSEDP S[166.9984]P     | 1.388  | 1.40E-04 | 0.003     | 0 | 44.42 | 18 | 44  | 1 | 254  | 1.3   |
| 1872.864 | 7  | Q9BTL3       | K.RPPESPPIVEE RPPES[166.998  | 1.291  | 5.60E-04 | 9.00E-04  | 0 | 39.18 | 19 | 39  | 1 | 118  | 0.5   |
| 1018.575 | 6  | Q9BTP6       | R.AILEMKWK.V AILEMKWK        | -0.767 | 0.018    | 0.003     | 1 | 21.86 | 17 | 22  | 1 | 218  | 2.99  |
| 1847.747 | 9  | Q9BTU6       | R.VAAAAGSGP VAAAAGSGPS[2     | 0.287  | 0.002    | 0.001     | 0 | 33.42 | 18 | 33  | 2 | 479  | 0.74  |
| 1767.781 | 10 | Q9BTU6       | R.VAAAAGSGP VAAAAGSGPS[3     | 0.888  | 0.004    | -7.00E-04 | 0 | 30.22 | 19 | 30  | 2 | 479  | -0.4  |
| 1669.873 | 17 | Q9BTX1       | K.KLNSPEETAFC KLNS[166.9984  | 1.301  | 1.50E-04 | 0.002     | 1 | 44.56 | 19 | 68  | 2 | 674  | 0.98  |
| 1541.688 | 10 | Q9BTX1       | K.LNSPEETAFC LNS[166.9984]   | 1.382  | 1.30E-04 | 0.002     | 0 | 44.37 | 18 | 44  | 2 | 674  | 1.03  |
| 2130.839 | 9  | Q9BU23       | K.DSGAASEQA DSGAASEQATA      | -0.149 | 0.004    | 0.001     | 0 | 27.06 | 16 | 27  | 2 | 707  | 0.54  |
| 2130.839 | 22 | Q9BU23       | K.DSGAASEQA DSGAASEQATA      | 0.804  | 4.80E-04 | 0.001     | 0 | 36.59 | 16 | 65  | 3 | 707  | 0.54  |
| 2130.839 | 13 | Q9BU23       | K.DSGAASEQA DSGAASEQATA      | -0.02  | 0.003    | 0.002     | 0 | 28.35 | 16 | 28  | 2 | 707  | 1.01  |
| 1898.816 | 10 | Q9BU76       | R.RPAEATSPTR RPAEAT[181.01   | 0.13   | 0.002    | 0.003     | 0 | 31.85 | 18 | 32  | 4 | 263  | 1.53  |
| 1818.849 | 11 | Q9BU76       | R.RPAEATSPTR RPAEATSPTR[1    | -1.071 | 0.039    | 0.003     | 0 | 19.82 | 18 | 27  | 4 | 263  | 1.5   |
| 1898.816 | 11 | Q9BU76       | R.RPAEATSPTR RPAEATSPTR[1    | -0.453 | 0.009    | 0.003     | 0 | 26.01 | 18 | 45  | 5 | 263  | 1.53  |
| 1898.816 | 6  | Q9BU76       | R.RPAEATSPTR RPAEATSPTR[1    | -0.999 | 0.034    | 0.003     | 0 | 20.54 | 18 | 21  | 5 | 263  | 1.53  |
| 1818.849 | 16 | Q9BU76       | R.RPAEATSPTR RPAEATSPTR[3    | 0.426  | 0.011    | 0.004     | 0 | 25.61 | 19 | 27  | 4 | 263  | 2.1   |
| 1355.635 | 17 | Q9BUA3       | R.AESPPAPPP AEA[166.9984]    | 0.612  | 8.50E-04 | 1.00E-04  | 0 | 36.67 | 18 | 37  | 1 | 381  | 0.09  |
| 1294.604 | 9  | Q9BUH6       | R.LAAAEETAVS LAAAEETAVS[1    | 2.159  | 1.40E-06 | 0.002     | 0 | 63.61 | 18 | 64  | 2 | 204  | 1.6   |
| 3626.479 | 9  | Q9BUR4       | K.TLETQPLAPD TLETQPLAPDC[3   | -0.107 | 0.044    | 0.002     | 0 | 18.27 | 17 | 18  | 1 | 548  | 0.69  |
| 1796.774 | 15 | Q9BUW7       | R.LEFQQLGELA LEFQQLGELAP     | -0.908 | 0.026    | 0.002     | 0 | 21.45 | 18 | 21  | 1 | 83   | 1.26  |
| 1536.662 | 9  | Q9BUZ4       | R.GSLDESSLGFC GS[166.9984]   | 0.65   | 7.10E-04 | 0.003     | 0 | 36.05 | 17 | 36  | 1 | 470  | 1.84  |
| 1432.635 | 7  | Q9BV36       | R.ASSESIQIFELN ASS[166.9984] | -0.334 | 0.007    | 0.003     | 0 | 28.21 | 19 | 28  | 3 | 600  | 2.08  |
| 2043.864 | 15 | Q9BV44       | K.DETDESSKEE DETDES[166.99   | -1.242 | 0.049    | 0.002     | 1 | 19.14 | 19 | 19  | 3 | 507  | 0.86  |
| 1563.716 | 7  | Q9BV73       | R.LHSPGATSTA LHS[166.9984]   | -0.953 | 0.031    | 0.002     | 0 | 21    | 18 | 21  | 2 | 2442 | 0.99  |
| 1439.658 | 9  | Q9BVC5       | K.SPPLSPVGTTF S[166.9984]P   | -0.618 | 0.014    | 0.002     | 0 | 24.37 | 18 | 24  | 2 | 232  | 1.26  |
| 1359.692 | 9  | Q9BVC5       | K.SPPLSPVGTTF S[166.9984]P   | -0.443 | 0.008    | 0.001     | 0 | 26.1  | 18 | 26  | 3 | 232  | 0.91  |
| 1542.706 | 14 | Q9BVG9       | R.DAGGPRPESF DAGGPRPES[1     | 1.291  | 6.20E-04 | -0.001    | 0 | 36.94 | 17 | 37  | 2 | 487  | -0.74 |
| 1399.61  | 8  | Q9BVJ6       | K.DSGSQEVLSE DSGS[166.9984   | 1.898  | 4.20E-05 | 0.002     | 0 | 48.53 | 17 | 49  | 5 | 771  | 1.6   |
| 1399.61  | 12 | Q9BVJ6       | K.DSGSQEVLSE DSGS[166.9984]  | 1.694  | 6.70E-05 | 0.002     | 0 | 46.49 | 17 | 62  | 4 | 771  | 1.6   |
| 1756.727 | 8  | Q9BVJ6       | R.SELSQDAEPA SELS[166.9984]  | 0.374  | 0.001    | 2.00E-04  | 0 | 33.28 | 17 | 62  | 4 | 771  | 0.14  |
| 1912.828 | 14 | Q9BVJ6       | K.RSELSQDAEPA RSELSQDAEPA    | -0.146 | 0.047    | -0.001    | 1 | 18.89 | 18 | 72  | 4 | 771  | -0.56 |
| 1756.727 | 13 | Q9BVJ6       | R.SELSQDAEPA SELS[166.9984]  | -1.148 | 0.045    | 3.00E-04  | 0 | 18.1  | 17 | 47  | 3 | 771  | 0.19  |
| 1694.691 | 10 | Q9BVW5       | R.AHTVEEVNTI AHTVEEVNTI[1    | 0.178  | 0.021    | 0.002     | 0 | 21.1  | 17 | 21  | 1 | 301  | 1.06  |
| 1624.649 | 7  | Q9BW04       | R.AEDAPLSGE AEDAPLS[166.9    | 0.097  | 0.002    | 0.003     | 0 | 30.55 | 17 | 31  | 2 | 601  | 1.59  |
| 1598.622 | 7  | Q9BW71       | R.EESESEAEPI EES[166.9984]   | 0.649  | 7.40E-04 | 0.002     | 0 | 35.04 | 16 | 145 | 8 | 556  | 0.93  |
| 1122.519 | 10 | Q9BW71       | K.NGVAAEVSP NGVAAEVSP[16     | 0.195  | 0.002    | 0.001     | 0 | 33.5  | 19 | 145 | 8 | 556  | 1.11  |
| 1554.607 | 10 | Q9BW71       | R.EVSDSEAGCV EVS[166.9984]   | 1.808  | 4.40E-05 | 0.003     | 0 | 47.63 | 17 | 104 | 6 | 556  | 1.69  |
| 1728.721 | 10 | Q9BW71       | K.ESESESEEH ESESESE[166.99   | 0.108  | 0.002    | 0.001     | 0 | 30.63 | 17 | 145 | 8 | 556  | 0.82  |
| 2136.898 | 9  | Q9BW71       | K.SLKESESEEE SLKES[166.998   | -0.673 | 0.014    | -6.00E-04 | 1 | 23.81 | 18 | 115 | 9 | 556  | -0.26 |
| 1678.588 | 8  | Q9BW71       | R.EESESEAEPI EES[166.9984]   | -0.943 | 0.025    | 0.001     | 0 | 18.13 | 15 | 133 | 7 | 556  | 0.69  |
| 1471.544 | 5  | Q9BW71       | K.RRPTPCSDPEI RRPT[181.014]  | -0.294 | 0.006    | 0.002     | 0 | 24.62 | 15 | 133 | 7 | 556  | 1.66  |
| 2658.175 | 22 | Q9BWG6       | R.EPEAAGPOV EPEAAGPOAE       | 1.291  | 0.001    | 0.003     | 0 | 34.05 | 18 | 34  | 1 | 230  | 1.18  |
| 1123.514 | 5  | Q9BWH2       | K.SNQIPTEVR.S S[166.9984]N   | -0.886 | 0.023    | 4.00E-04  | 0 | 20.69 | 17 | 21  | 1 | 189  | 0.35  |
| 2170.886 | 14 | Q9BWH6       | R.ARPSPGHCLP ARPS[166.9984   | 0.433  | 0.012    | 0.001     | 0 | 23.67 | 17 | 24  | 1 | 1393 | 0.6   |
| 1575.683 | 6  | Q9BWT3       | K.RLSLSDSCLDS RLS[166.9984]  | -1.081 | 0.036    | 0.002     | 1 | 19.74 | 18 | 25  | 3 | 736  | 1.12  |
| 1575.683 | 13 | Q9BWT3       | K.RLSLSDSCLDS RLS[166.9984]  | 1.098  | 0.002    | 0.002     | 1 | 31.34 | 18 | 46  | 2 | 736  | 0.99  |
| 2231.045 | 17 | Q9BWU0       | R.SLQEQSRPP SLQEQSRPP[7      | -0.021 | 0.037    | 0.002     | 0 | 19.13 | 17 | 93  | 4 | 796  | 0.72  |
| 2081.72  | 10 | Q9BWU0       | K.MLGEDSDEE MLGEDS[166.9     | 2.159  | 1.50E-09 | 0.001     | 0 | 89.83 | 14 | 105 | 3 | 796  | 0.6   |
| 2241.896 | 22 | Q9BWU0       | K.ETQTHENMSI ETQTHENMSQ      | 0.553  | 0.01     | 0.002     | 0 | 24.85 | 17 | 105 | 3 | 796  | 0.93  |
| 2241.896 | 12 | Q9BWU0       | K.ETQTHENMSI ETQTHENMS[1     | 0.302  | 0.018    | 0.002     | 0 | 22.35 | 17 | 89  | 3 | 796  | 0.9   |

|          |    |        |                                 |        |          |           |   |       |    |     |    |      |       |
|----------|----|--------|---------------------------------|--------|----------|-----------|---|-------|----|-----|----|------|-------|
| 2368.96  | 22 | Q9BY89 | R.LSLSQTEPT LSS[166.9984]L 3    | 1.2    | 0.002    | 0.001     | 0 | 32.62 | 18 | 91  | 7  | 1806 | 0.51  |
| 1313.526 | 8  | Q9BYG3 | K.SQVAELNDDI S[166.9984]OV. 2   | -0.546 | 0.012    | -0.001    | 0 | 24.09 | 17 | 110 | 8  | 293  | -0.73 |
| 2159.938 | 10 | Q9BYG3 | K.SQVAELNDDI S[166.9984]OV. 2   | 2.159  | 3.40E-06 | 0.001     | 1 | 60.42 | 18 | 110 | 8  | 293  | 0.56  |
| 1126.503 | 7  | Q9BYG3 | K.VSGTLDTPK VSGTLD[181.C 2      | 1.211  | 1.70E-04 | 3.00E-04  | 0 | 43.66 | 19 | 110 | 8  | 293  | 0.3   |
| 1483.607 | 12 | Q9BYG5 | R.HGAGSGCLG HGAGS[166.99 2      | 1.269  | 1.80E-04 | 0.002     | 0 | 43.62 | 18 | 43  | 1  | 372  | 1.6   |
| 1058.47  | 6  | Q9BYI3 | R.NAVTSMJIR.I NAVTSM[166. 2     | 1.385  | 1.30E-04 | 0.001     | 0 | 44.4  | 18 | 44  | 1  | 521  | 0.95  |
| 1219.412 | 5  | Q9BYT3 | K.CPDCSSASOK C[160.0307]PD 3    | -0.122 | 0.041    | -0.002    | 0 | 14.13 | 13 | 14  | 1  | 514  | -1.24 |
| 1775.698 | 6  | Q9BYW2 | K.NSTLPMETTS NSTLPMETTS[1 2     | -0.922 | 0.029    | 0.003     | 0 | 19.31 | 16 | 19  | 7  | 2564 | 1.93  |
| 2242.942 | 14 | Q9BYW2 | K.SSEPFREPL SES[166.9984]F 3    | -0.067 | 0.043    | 0.004     | 1 | 18.65 | 17 | 28  | 4  | 2564 | 1.82  |
| 1874.711 | 11 | Q9BYX2 | R.RAVSEGCASE RAVSEGC[160.I 2    | -0.658 | 0.013    | -7.00E-04 | 1 | 20.97 | 15 | 21  | 1  | 928  | -0.36 |
| 1290.573 | 8  | Q9BZ23 | R.LGYSVGPPTS.V LGS[166.9984] 2  | 2.158  | 2.10E-05 | -4.00E-04 | 0 | 52.13 | 18 | 52  | 2  | 570  | -0.29 |
| 1753.823 | 8  | Q9BZ23 | R.RASSASVPAV RAS[166.9984] 2    | -0.143 | 0.004    | 0.001     | 1 | 30.12 | 19 | 56  | 4  | 570  | 0.77  |
| 1927.803 | 9  | Q9BZ23 | R.ASATSVSSAG ASATSVSS[166. 2    | -1.22  | 0.047    | 0         | 0 | 18.35 | 18 | 56  | 4  | 570  | 0     |
| 2576.143 | 9  | Q9BZ71 | R.KGSISSQTDTF KGSISS[166.99 3   | 1.181  | 0.002    | 0.003     | 1 | 32.15 | 18 | 43  | 2  | 974  | 1     |
| 2576.143 | 21 | Q9BZ71 | R.KGSISSQTDTF KGSISSQTDT[1 3    | 1.291  | 0.001    | 0.003     | 1 | 33.9  | 18 | 34  | 2  | 974  | 1     |
| 1712.726 | 13 | Q9BZ71 | K.SNIDISSGLEL S[166.9984]NIC 2  | -0.211 | 0.005    | 0.002     | 0 | 27.44 | 17 | 29  | 2  | 974  | 1.35  |
| 2197.928 | 11 | Q9BZD3 | R.VSSQAEDTSS VSS[166.9984]C 2   | -1.077 | 0.037    | 0.004     | 0 | 18.78 | 17 | 19  |    |      | 1.86  |
| 2197.928 | 10 | Q9BZD3 | R.VSSQAEDTSS VS[166.9984]S 2    | 2.172  | 1.10E-05 | 0.004     | 0 | 53.99 | 17 | 54  |    |      | 1.86  |
| 1552.741 | 8  | Q9BZE9 | R.AAGSPSPPLA AAGSPS[166.99 2    | -0.985 | 0.033    | 0.002     | 0 | 20.7  | 18 | 21  | 2  | 553  | 1.18  |
| 1552.741 | 9  | Q9BZE9 | R.AAGSPSPPLA AAGS[166.998 2     | -1.008 | 0.035    | 0.002     | 0 | 20.45 | 18 | 20  | 1  | 553  | 1.18  |
| 1955.696 | 9  | Q9BZF1 | K.ENDQEHDESI ENDQEHDESI[1 2     | -0.911 | 0.026    | 0.003     | 0 | 18.44 | 15 | 18  | 1  | 889  | 1.46  |
| 1439.657 | 7  | Q9BZL4 | K.SPVLQEEAPF S[166.9984]PVI 2   | 0.463  | 0.001    | 0.002     | 0 | 35.18 | 18 | 47  | 2  | 782  | 1.59  |
| 1619.695 | 10 | Q9BZL4 | R.SASSSWLEGT SAS[166.9984] 2    | -0.08  | 0.004    | 0.002     | 0 | 29.75 | 18 | 47  | 2  | 782  | 1.14  |
| 1829.799 | 10 | Q9BZL6 | R.LGTSESLPCTA LGTSES[166.99 2   | -0.509 | 0.01     | -0.004    | 0 | 24.45 | 17 | 24  | 2  | 878  | -2.38 |
| 1779.795 | 6  | Q9C086 | R.AWLDEDSNL AWLDEDSNLS 2        | -0.975 | 0.028    | 0.002     | 0 | 20.78 | 18 | 21  | 1  | 356  | 1.24  |
| 797.417  | 6  | Q9C0A0 | R.LJISGK.V US[166.9984]IS 2     | -0.676 | 0.015    | 8.00E-04  | 0 | 26.79 | 21 | 27  | 1  | 1308 | 0.98  |
| 2506.051 | 16 | Q9C0A6 | K.VTVSSDHEEV VTVS[166.998 3     | 1.224  | 0.001    | 0.002     | 0 | 34.7  | 18 | 35  | 2  | 1442 | 0.9   |
| 2506.051 | 10 | Q9C0A6 | K.VTVSSDHEEV VTVSS[166.998 3    | 0.596  | 0.008    | 0.002     | 0 | 26.28 | 18 | 26  | 2  | 1442 | 0.9   |
| 1656.748 | 16 | Q9C0B5 | R.GDLSKEPTSI A GDS[166.998 3    | 0.949  | 0.004    | 0.002     | 1 | 29.81 | 18 | 72  | 4  | 715  | 1.15  |
| 1634.757 | 17 | Q9C0B5 | R.GVSGPEPPTI GVS[166.998 2      | 1.197  | 3.20E-05 | 0.002     | 0 | 50.29 | 18 | 72  | 4  | 715  | 1.28  |
| 1758.758 | 9  | Q9C0C2 | R.FSEGVLOSFS FS[166.9984]E 2    | -0.892 | 0.025    | 0.001     | 0 | 21.63 | 18 | 552 | 25 | 1729 | 0.74  |
| 2166.011 | 18 | Q9C0C2 | R.YESQEPLAQ YESQEPLAQE 3        | 1.224  | 3.60E-05 | 0.004     | 0 | 50.06 | 18 | 550 | 23 | 1729 | 2.03  |
| 1499.347 | 14 | Q9C0C2 | R.NRSAAEGELA NRS[166.998 2      | 2.119  | 5.30E-07 | 0.002     | 1 | 68.34 | 18 | 550 | 23 | 1729 | 1.14  |
| 2025.822 | 13 | Q9C0C2 | R.QQAGAOPC QQAGAOPGS 2          | -1.115 | 0.046    | 0.001     | 0 | 18.4  | 17 | 552 | 25 | 1729 | 0.58  |
| 1317.595 | 12 | Q9C0C2 | R.HNGSLSPGLE HNGSL[166.99 2     | 0.648  | 6.60E-04 | 0.002     | 0 | 38.03 | 19 | 552 | 25 | 1729 | 1.38  |
| 2350.997 | 18 | Q9C0C2 | R.TEAQDLCRAS TEAQDL[160.C 3     | 0.77   | 0.005    | 0.003     | 1 | 28.02 | 18 | 552 | 25 | 1729 | 1.4   |
| 2302.994 | 23 | Q9C0C2 | K.RDLSGAYASC RDS[166.998 3      | 1.224  | 2.50E-07 | 0.003     | 1 | 71.97 | 19 | 550 | 23 | 1729 | 1.2   |
| 2060.863 | 11 | Q9C0C2 | K.DTQSPSTCEI DTQS[166.998 2     | 1.638  | 7.90E-05 | 0.002     | 0 | 47.93 | 19 | 552 | 25 | 1729 | 1.03  |
| 2910.247 | 10 | Q9C0C2 | R.SFGTRPLSSGI SFGTRPLSS[166 3   | 1.224  | 2.50E-04 | 0.003     | 0 | 41.57 | 18 | 550 | 23 | 1729 | 0.92  |
| 1766.748 | 7  | Q9C0C2 | R.VPSSDVEVEI VPSS[166.998 2     | 2.043  | 3.20E-05 | 0.004     | 0 | 49.98 | 17 | 550 | 23 | 1729 | 2.14  |
| 2910.247 | 19 | Q9C0C2 | R.SFGTRPLSSGI SFGTRPLS[166. 3   | 1.291  | 1.40E-04 | 0.003     | 0 | 44.29 | 18 | 552 | 25 | 1729 | 0.92  |
| 1103.477 | 6  | Q9C0C2 | R.VSAGAGFSPS VSGAGF[166. 2      | 2.26   | 1.90E-05 | 0.002     | 0 | 55.15 | 20 | 552 | 25 | 1729 | 1.47  |
| 1558.632 | 7  | Q9C0C2 | R.EAASFPGQEI EAASF[166.99 2     | 0.457  | 0.001    | 0.002     | 0 | 35.12 | 18 | 552 | 25 | 1729 | 1.54  |
| 1914.859 | 11 | Q9C0C2 | R.RFSEGLQSP RFS[166.9984]E 3    | 0.227  | 0.021    | 0.003     | 1 | 22.59 | 18 | 552 | 25 | 1729 | 1.36  |
| 1229.493 | 8  | Q9C0C2 | R.SAAEEGELAESI S[166.9984]AEI 2 | 0.692  | 6.20E-04 | 0.001     | 0 | 37.47 | 18 | 552 | 25 | 1729 | 1.17  |
| 1758.758 | 13 | Q9C0C2 | R.FSEGVLOSFS FSEGVLOS[166. 2    | 1.432  | 1.10E-04 | 0.002     | 0 | 45.87 | 19 | 552 | 25 | 1729 | 1.03  |
| 1717.722 | 8  | Q9C0C2 | R.SQEAADVQDV S[166.9984]QE. 2   | 0.696  | 6.20E-04 | 0.003     | 1 | 37.51 | 18 | 552 | 25 | 1729 | 1.49  |
| 1955.733 | 6  | Q9C0C2 | R.YSSQDADEQI YS[166.9984]C 2    | 0.352  | 0.001    | 0.002     | 0 | 32.07 | 16 | 552 | 25 | 1729 | 0.87  |
| 2910.247 | 17 | Q9C0C2 | R.SFGTRPLSSGI SFGTRPLSSGF 3     | 1.317  | 0.001    | 0.003     | 0 | 34.06 | 18 | 466 | 22 | 1729 | 0.92  |
| 1484.591 | 13 | Q9C0C2 | R.NMAPGAVCS NMAPGAVC[1E 2       | 0.448  | 0.001    | 0.004     | 0 | 33.01 | 16 | 610 | 24 | 1729 | 2.88  |
| 1955.733 | 9  | Q9C0C2 | R.YSSQDADEQI YS[166.9984]C 2    | 0.706  | 5.90E-04 | 0.002     | 0 | 35.62 | 16 | 470 | 24 | 1729 | 0.87  |
| 1758.758 | 12 | Q9C0C2 | R.FSEGVLOSFS FSEGVLOS[1E 2      | 0.031  | 0.003    | 0.002     | 0 | 31.86 | 19 | 550 | 23 | 1729 | 1.03  |
| 1512.658 | 8  | Q9C0C7 | R.LELSSASPOE LELSSAS[166. 2     | -1.078 | 0.035    | 0.002     | 0 | 20.77 | 19 | 24  | 4  | 1298 | 1.12  |
| 2250.962 | 9  | Q9C0C7 | R.SSQGTGTEPGA SQTGTEPGA 3       | -0.051 | 0.04     | 0.003     | 0 | 19.85 | 18 | 25  | 4  | 1298 | 1.21  |
| 2250.962 | 16 | Q9C0C7 | R.SSQGTGTEPGA SQTGTEPGA 3       | 0.09   | 0.029    | 0.003     | 0 | 21.24 | 18 | 24  | 4  | 1298 | 1.21  |
| 837.448  | 5  | Q9C0C9 | K.SIPLSIK.N S[166.9984]PL 2     | -0.402 | 0.008    | 0.001     | 0 | 22.51 | 14 | 23  | 1  | 1292 | 1.29  |
| 2208.909 | 7  | Q9C0C9 | R.GSSGCSEAGC GSSGC[160.03 3     | -0.134 | 0.046    | 0.003     | 1 | 17.98 | 17 | 24  | 2  | 1292 | 1.28  |
| 1789.756 | 10 | Q9C0D5 | K.SPCTISSPSSI S[166.9984]PC 2   | 0.301  | 0.001    | 2.00E-04  | 0 | 36.56 | 21 | 37  | 2  | 1861 | 0.09  |
| 1401.615 | 6  | Q9C0D6 | R.SSENDVLEL SS[166.9984]SE 2    | -0.846 | 0.024    | 0.003     | 0 | 20.07 | 16 | 20  | 1  | 1143 | 1.88  |
| 1889.875 | 18 | Q9C0E2 | R.HOQQLLASPC HQQQLLAS[166 2     | 2.119  | 2.00E-05 | -8.00E-04 | 0 | 52.49 | 18 | 64  | 2  | 1151 | -0.42 |
| 1889.875 | 6  | Q9C0E2 | R.HOQQLLASPC HQQQLLAS[166 2     | 0.301  | 0.002    | -8.00E-04 | 0 | 33.56 | 18 | 34  | 2  | 1151 | -0.42 |
| 1889.875 | 16 | Q9C0E2 | R.HOQQLLASPC HQQQLLAS[166 2     | 2.024  | 1.50E-06 | -8.00E-04 | 0 | 63.58 | 18 | 72  | 2  | 1151 | -0.42 |
| 1889.875 | 9  | Q9C0E2 | R.HOQQLLASPC HQQQLLAS[166 2     | 0.756  | 5.40E-04 | -8.00E-04 | 0 | 38.1  | 18 | 45  | 2  | 1151 | -0.42 |
| 1671.726 | 13 | Q9C0H5 | R.KPSSETDIENV KPSS[166.998 2    | -0.856 | 0.022    | -2.00E-04 | 0 | 21.99 | 18 | 22  | 1  | 1083 | -0.14 |
| 1643.632 | 10 | Q9GRZ7 | K.AQAVSEEEEE AQAVS[166.99 2     | 2.159  | 9.00E-07 | -0.002    | 0 | 64.59 | 17 | 65  | 2  | 859  | -1.36 |
| 950.445  | 6  | Q9H019 | R.NASVPLNR.G NAS[166.998 2      | -0.93  | 0.027    | 5.00E-04  | 0 | 19.25 | 16 | 19  | 1  | 292  | 0.53  |
| 1447.634 | 12 | Q9H0A0 | R.GDDEEWNEV GDDEEWNEVL 2        | 0.212  | 0.002    | 0.002     | 0 | 31.67 | 17 | 32  | 1  | 1025 | 1.41  |
| 1796.77  | 7  | Q9H0B6 | K.SVEEPTOPGG S[166.9984]VEI 2   | -0.758 | 0.02     | 0.003     | 0 | 21.97 | 17 | 22  | 1  | 622  | 1.65  |
| 1263.529 | 8  | Q9H0B6 | R.TLSSSMDLST TLSSSS[166.99 2    | 0.862  | 4.70E-04 | 0.002     | 0 | 37.17 | 16 | 53  | 3  | 622  | 1.47  |
| 1263.529 | 7  | Q9H0B6 | R.TLSSSMDLST TLSSSS[166.99 2    | 1.053  | 3.00E-04 | 0.002     | 0 | 39.06 | 16 | 39  | 3  | 622  | 1.47  |
| 1263.529 | 7  | Q9H0B6 | R.TLSSSMDLST TLSS[166.998 2     | 0.433  | 0.001    | 0.002     | 0 | 32.89 | 16 | 33  | 1  | 622  | 1.47  |
| 1326.51  | 8  | Q9H0B6 | K.LDEADPNNEE LDEAD[166.99 2     | -0.973 | 0.027    | 0.002     | 0 | 20.81 | 18 | 61  | 4  | 622  | 1.92  |
| 1293.558 | 7  | Q9H0D6 | R.NSPGSQVASH NS[166.9984]P 2    | 2.159  | 1.10E-05 | 0.002     | 0 | 54.99 | 18 | 77  | 3  | 950  | 1.55  |
| 1768.655 | 16 | Q9H0D6 | K.AEDSDSEPEI AEDS[166.998 2     | 1.06   | 2.90E-04 | 0.001     | 0 | 38.15 | 15 | 77  | 3  | 950  | 0.63  |
| 837.448  | 7  | Q9H0H5 | K.TVPLSK.V T[181.014]VPL 2      | -0.293 | 0.006    | 0.001     | 0 | 23.62 | 14 | 44  | 2  | 632  | 1.28  |
| 1654.768 | 19 | Q9H0H5 | R.SIGSAVDQGN S[166.9984]GS 2    | 0.897  | 4.10E-04 | 0.002     | 0 | 39.52 | 18 | 43  | 2  | 632  | 1.36  |
| 1546.665 | 11 | Q9H0W8 | K.EPGSGGPNQI EPGSGGPNQLS 2      | -0.463 | 0.009    | 6.00E-04  | 0 | 22.92 | 15 | 23  | 1  | 520  | 0.4   |
| 1240.572 | 5  | Q9H0Y9 | R.QTTFLGSPG QTTFLGS[166.9 2     | -1.185 | 0.047    | 6.00E-04  | 0 | 17.7  | 17 | 18  | 2  | 879  | 0.49  |
| 1853.682 | 6  | Q9H0Y9 | R.ENPEESDTEI ENPEES[166.99 2    | -1.111 | 0.038    | 0.002     | 0 | 18.47 | 17 | 18  | 1  | 879  | 1.34  |
| 1576.725 | 13 | Q9H1B7 | R.KASPEPPDSA KAS[166.998 2      | 1.11   | 2.50E-04 | 0.003     | 1 | 42.65 | 19 | 99  | 8  | 796  | 1.71  |
| 1549.701 | 8  | Q9H1B7 | R.NSSSPVSPAS NSSS[166.998 2     | 0.932  | 3.50E-04 | 0.002     | 0 | 39.87 | 18 | 83  | 7  | 796  | 1.02  |
| 1448.63  | 8  | Q9H1B7 | K.ASPEPPDSAEI AS[166.998 2      | -1.138 | 0.04     | 0.001     | 0 | 19.17 | 18 | 99  | 8  | 796  | 0.94  |
| 1785.768 | 17 | Q9H1B7 | R.NSSSPVSPAS RNS[166.998 2      | -1.011 | 0.03     | 0.003     | 1 | 20.42 | 18 | 105 | 7  | 796  | 1.54  |
| 1629.667 | 9  | Q9H1B7 | R.NSSSPVSPAS NSSS[166.998 2     | -1.11  | 0.044    | 9.00E-04  | 0 | 18.43 | 17 | 93  | 6  | 796  | 0.53  |
| 1549.701 | 9  | Q9H1B7 | R.NSSSPVSPAS NSSS[166.998 2     | 1.664  | 6.50E-05 | 0.002     | 0 | 47.17 | 18 | 105 | 7  | 796  | 1.02  |
| 1785.768 | 14 | Q9H1B7 | R.NSSSPVSPAS RNS[166.998 2      | -0.664 | 0.013    | 0.001     | 1 | 23.89 | 18 | 105 | 7  | 796  | 0.59  |
| 1494.552 | 8  | Q9H1E3 | K.EEDE                          |        |          |           |   |       |    |     |    |      |       |

|          |    |        |                              |   |           |          |           |   |       |    |     |    |      |       |
|----------|----|--------|------------------------------|---|-----------|----------|-----------|---|-------|----|-----|----|------|-------|
| 1291.593 | 14 | Q9H307 | K.EIAIVHSDAEK EIAIVHS[166.95 | 2 | 0.096     | 0.002    | 0.002     | 0 | 31.51 | 18 | 123 | 6  | 717  | 1.29  |
| 1215.496 | 7  | Q9H307 | K.ENVSALDMEI ENV[166.9984    | 2 | 0.942     | 4.00E-04 | 0.001     | 0 | 34.95 | 13 | 149 | 6  | 717  | 1.1   |
| 1484.615 | 6  | Q9H307 | R.VESVEPSENE VESVEPESENAS    | 2 | -0.736    | 0.016    | 0.003     | 0 | 23.22 | 18 | 100 | 7  | 717  | 1.83  |
| 2742.191 | 11 | Q9H330 | R.GESAPTSTSF GESAPTSTSPS     | 3 | 1.103     | 0.002    | 0.003     | 0 | 33.35 | 20 | 33  | 1  | 911  | 1.06  |
| 2742.191 | 14 | Q9H330 | R.GESAPTSTSF GESAPTSTSPS     | 3 | 0.632     | 0.007    | 0.003     | 0 | 28.68 | 20 | 29  | 1  | 911  | 1.06  |
| 2392.078 | 19 | Q9H3H1 | R.RLDSDAVNTII RLDSDAVNTIES   | 3 | 1.012     | 0.003    | 0.001     | 1 | 32.44 | 20 | 32  | 2  | 467  | 0.41  |
| 2235.977 | 16 | Q9H3H1 | R.LDSDAVNTIEI LDSDAVNTIESC   | 3 | -0.12     | 0.042    | 0.003     | 0 | 19.14 | 18 | 19  | 1  | 467  | 1.2   |
| 2235.977 | 9  | Q9H3H1 | R.LDSDAVNTIEI LDSDAVNTIESC   | 3 | -0.061    | 0.037    | 0.003     | 0 | 19.72 | 18 | 20  | 1  | 467  | 1.2   |
| 2389.893 | 11 | Q9H3N1 | K.VEEEQEADEE VEEEQEADEED     | 2 | 2.159     | 6.00E-07 | 0.001     | 0 | 63.65 | 14 | 149 | 6  | 280  | 0.6   |
| 2517.988 | 19 | Q9H3N1 | K.VEEEQEADEE VEEEQEADEEI     | 3 | 1.256     | 3.60E-04 | 0.004     | 1 | 39.09 | 17 | 116 | 5  | 280  | 1.66  |
| 1068.497 | 9  | Q9H3N1 | R.SLGPPLATDK S[166.9984]LGI  | 2 | -0.899    | 0.024    | 0.001     | 0 | 22.55 | 19 | 130 | 5  | 280  | 1.06  |
| 1352.657 | 8  | Q9H3N1 | R.QRSLGSPSLATI QRS[166.9984] | 2 | -0.045    | 0.004    | 0.002     | 1 | 32.1  | 20 | 149 | 6  | 280  | 1.37  |
| 2316.091 | 14 | Q9H3P2 | R.EASRPPEEPSI EASRPPEEPSAP   | 3 | -1.11E-05 | 0.036    | 0.004     | 0 | 20.37 | 18 | 20  | 1  | 528  | 1.5   |
| 1986.781 | 5  | Q9H3Q1 | K.AGEPDQESLD AGEPPDQES[166   | 2 | -0.663    | 0.015    | 0.002     | 0 | 21.91 | 16 | 22  | 1  | 356  | 0.78  |
| 1925.839 | 8  | Q9H410 | K.SLHSLPQEQS/ SLHLS[166.998  | 3 | 0.769     | 0.005    | 0.002     | 0 | 29.01 | 19 | 46  | 3  | 356  | 1.1   |
| 1925.839 | 8  | Q9H410 | K.SLHSLPQEQS/ S[166.9984]LH  | 3 | 0.075     | 0.026    | 0.002     | 0 | 22.11 | 19 | 53  | 2  | 356  | 1.1   |
| 1183.535 | 5  | Q9H425 | R.SSSLDALGPTT SSS[166.9984]L | 2 | -0.898    | 0.027    | 4.00E-04  | 0 | 21.57 | 18 | 22  | 2  | 327  | 0.3   |
| 2774.267 | 19 | Q9H4A3 | K.EKPELSEPHL EKPELSEPHLN     | 3 | 0.175     | 0.02     | 0.005     | 0 | 22.1  | 0  | 0   | 1  | 2382 | 1.75  |
| 2774.267 | 10 | Q9H4A3 | K.EKPELSEPHL EKPELSEPHLN     | 3 | 0.219     | 0.018    | 0.005     | 0 | 22.55 | 18 | 23  | 1  | 2382 | 1.75  |
| 1119.519 | 7  | Q9H4G0 | K.HQASINELK R HQAS[166.998   | 2 | -0.995    | 0.03     | 9.00E-04  | 0 | 22.6  | 20 | 56  | 10 | 881  | 0.83  |
| 2638.105 | 16 | Q9H4G0 | R.SLDGAEFSPR SLDGAEFSPRAS    | 3 | 1.291     | 3.90E-04 | 0.004     | 0 | 39.42 | 18 | 56  | 10 | 881  | 1.33  |
| 894.47   | 5  | Q9H4G0 | R.SLSPIGK.D SLS[166.9984]P   | 2 | -0.03     | 0.003    | 7.00E-04  | 0 | 32.25 | 20 | 56  | 10 | 881  | 0.8   |
| 2638.105 | 13 | Q9H4G0 | R.SLDGAEFSPR SLDGAEFSPRAS    | 3 | 0.276     | 0.017    | 0.004     | 0 | 23.11 | 18 | 64  | 11 | 881  | 1.33  |
| 1743.712 | 12 | Q9H4G0 | R.GACSTPDMP GAC[160.0307]    | 2 | -1.044    | 0.038    | 0.004     | 0 | 18.14 | 16 | 83  | 10 | 881  | 2.42  |
| 1512.658 | 7  | Q9H4G0 | R.SEAEEGVRT SEAEEGVRT[1      | 2 | -0.894    | 0.023    | 0.002     | 1 | 22.64 | 19 | 83  | 10 | 881  | 1.17  |
| 1743.712 | 7  | Q9H4G0 | R.GACSTPDMP GAC[160.0307]    | 2 | 0.685     | 7.20E-04 | 0.004     | 0 | 35.38 | 16 | 84  | 16 | 881  | 2.42  |
| 2718.072 | 13 | Q9H4G0 | R.SLDGAEFSPR SL[166.9984]LD  | 3 | 0.49      | 0.011    | 0.003     | 0 | 24.28 | 17 | 68  | 12 | 881  | 1.02  |
| 1147.539 | 7  | Q9H4G0 | R.LPSPSPASPK LPSPSPAS[166.9  | 2 | -0.706    | 0.015    | 7.00E-04  | 0 | 24.46 | 19 | 77  | 13 | 881  | 0.65  |
| 2350.946 | 13 | Q9H4L4 | K.NHLSPQOQG NHL[166.9984     | 3 | 0.036     | 0.032    | 9.00E-04  | 0 | 19.68 | 17 | 20  | 1  | 574  | 0.38  |
| 1967.875 | 10 | Q9H4L5 | R.LHSSNPNLSTI LHSS[166.9984  | 3 | 0.048     | 0.029    | 0.003     | 0 | 21.82 | 19 | 79  | 4  | 887  | 1.37  |
| 1967.875 | 10 | Q9H4L5 | R.LHSSNPNLSTI LHSS[166.9984] | 3 | 0.606     | 0.008    | 0.003     | 0 | 27.38 | 19 | 113 | 6  | 887  | 1.37  |
| 1333.626 | 5  | Q9H4L5 | R.ALVHQLSNEA ALVHQLS[166.9   | 2 | -1.198    | 0.044    | 0.002     | 0 | 19.57 | 19 | 113 | 6  | 887  | 1.9   |
| 2068.962 | 9  | Q9H4L5 | K.QLMEQDASS QLMEQDASS[2      | 2 | 2.159     | 1.00E-05 | 0.002     | 0 | 56.01 | 19 | 113 | 6  | 887  | 0.85  |
| 1397.61  | 9  | Q9H4L5 | R.QDSWEVVEV QDS[166.9984]    | 2 | -0.359    | 0.007    | 0.003     | 0 | 26.96 | 18 | 113 | 6  | 887  | 2.31  |
| 2068.962 | 8  | Q9H4L5 | K.QLMEQDASS QLMEQDASSP       | 2 | 0.5       | 9.20E-04 | 0.002     | 0 | 36.53 | 19 | 119 | 5  | 887  | 0.85  |
| 1023.491 | 4  | Q9H4L7 | R.KASISYFK.N KAS[166.9984]   | 2 | -0.745    | 0.018    | 8.00E-04  | 1 | 22.13 | 17 | 22  | 1  | 1026 | 0.74  |
| 842.34   | 3  | Q9H4M7 | K.QDSSGLR.L QDSS[166.9984    | 2 | -1.106    | 0.043    | -0.002    | 0 | 18.49 | 17 | 18  | 2  | 779  | -2.82 |
| 1452.637 | 11 | Q9H4Z3 | R.QLSEEQPSGN QL[166.9984]    | 2 | -0.962    | 0.03     | 0.002     | 0 | 20.93 | 18 | 21  | 3  | 704  | 1.23  |
| 2867.243 | 9  | Q9H4Z3 | R.EEASLLSHSPG EEAS[166.9984  | 3 | 0.06      | 0.027    | 0.002     | 0 | 19.97 | 17 | 23  | 3  | 704  | 0.79  |
| 953.434  | 6  | Q9H501 | K.IDNSIPK.K IDNSI[166.998    | 2 | -1.077    | 0.038    | 0.001     | 0 | 18.78 | 17 | 19  | 1  | 851  | 1.23  |
| 1402.568 | 5  | Q9H5H4 | R.YEPOSQGYEP YEPOS[166.998   | 2 | -0.295    | 0.007    | 0.002     | 0 | 25.6  | 16 | 41  | 4  | 540  | 1.67  |
| 1610.702 | 10 | Q9H5H4 | R.SPGLVPPSPF S[166.9984]PG   | 2 | -0.551    | 0.012    | 0.002     | 0 | 24.02 | 17 | 36  | 4  | 540  | 1.1   |
| 1361.514 | 6  | Q9H5H4 | R.FEPESPGFESF FEPE[166.998   | 2 | -0.138    | 0.004    | 0.002     | 0 | 28.15 | 17 | 53  | 3  | 540  | 1.53  |
| 1652.68  | 18 | Q9H5I1 | K.GSGDISSSDI GSGDISSDIDH     | 2 | 1.166     | 2.00E-04 | 0.001     | 0 | 42.19 | 18 | 42  | 2  | 410  | 0.76  |
| 1864.616 | 16 | Q9H6F5 | R.LGGLRPESPE LGGLRPES[166.   | 3 | 0.187     | 0.02     | 0.002     | 0 | 21.19 | 17 | 153 | 12 | 360  | 0.96  |
| 2383.104 | 23 | Q9H6F5 | R.LQQGAGLESF LQQGAGLESPQ     | 3 | 1.224     | 1.00E-04 | 0.003     | 0 | 44.64 | 17 | 173 | 12 | 360  | 1.4   |
| 2635.204 | 11 | Q9H6F5 | R.ALVEFESNPEI ALVEFESNPEET   | 3 | 1.224     | 2.40E-05 | 0.004     | 1 | 52.51 | 17 | 173 | 12 | 360  | 1.58  |
| 2463.07  | 22 | Q9H6F5 | R.LQQGAGLESF LQQGAGLES[16    | 3 | 0.754     | 0.006    | 0.002     | 0 | 27.86 | 18 | 153 | 12 | 360  | 0.85  |
| 1188.577 | 8  | Q9H6F5 | R.AGLGSPERP ALGLS[166.998    | 2 | 0.655     | 7.50E-04 | 0.004     | 0 | 37.1  | 18 | 153 | 12 | 360  | 0.3   |
| 1430.642 | 9  | Q9H6F5 | R.QQDLHLESPQ QDLHLES[166     | 3 | -0.029    | 0.038    | 7.00E-04  | 0 | 20.07 | 18 | 205 | 13 | 360  | 0.52  |
| 1133.499 | 5  | Q9H6F5 | R.EPGSPSPVQR EPG[166.9984    | 2 | -1.024    | 0.032    | 0.002     | 0 | 20.3  | 18 | 250 | 14 | 360  | 1.97  |
| 1063.428 | 5  | Q9H6H4 | R.SFSMQDLR.S SFS[166.9984]   | 2 | 0.401     | 0.001    | 0.001     | 0 | 32.56 | 16 | 33  | 1  | 257  | 1.31  |
| 1514.667 | 8  | Q9H6K1 | K.VEGNFNPFAS VEGNFNPFAS[1    | 2 | 0.644     | 7.70E-04 | 0.003     | 0 | 36.97 | 18 | 37  | 1  | 298  | 1.7   |
| 2013.774 | 10 | Q9H6S0 | R.KSSADTEFSOI KSS[166.9984]  | 2 | 2.159     | 2.10E-09 | 0.002     | 1 | 89.25 | 15 | 103 | 2  | 1430 | 0.74  |
| 2013.774 | 12 | Q9H6S0 | R.KSSADTEFSOI KSSADTEFS[16   | 3 | 1.126     | 0.002    | 0.003     | 1 | 28.58 | 15 | 103 | 2  | 1430 | 1.29  |
| 2013.774 | 20 | Q9H6S0 | R.KSSADTEFSOI KSSADT[181.01  | 3 | 0.553     | 0.009    | 0.003     | 1 | 22.88 | 15 | 79  | 3  | 1430 | 1.29  |
| 1817.678 | 9  | Q9H6S0 | R.VDGIPIPDSSD VDGIPINDS[166  | 2 | -0.914    | 0.027    | -0.003    | 0 | 18.4  | 15 | 114 | 3  | 1430 | -1.7  |
| 1817.678 | 16 | Q9H6S0 | R.VDGIPIPDSSD VDGIPINDS[16   | 2 | -0.52     | 0.011    | -0.003    | 0 | 22.33 | 15 | 100 | 4  | 1430 | -1.7  |
| 1817.678 | 15 | Q9H6S0 | R.VDGIPIPDSSD VDGIPINDS[16   | 2 | 0.229     | 0.002    | -0.003    | 0 | 29.84 | 15 | 124 | 3  | 1430 | -1.7  |
| 1885.679 | 10 | Q9H6S0 | R.KSSADTEFSDEI SS[166.9984]  | 2 | 0.229     | 0.002    | -5.00E-04 | 0 | 27.82 | 13 | 123 | 4  | 1430 | -0.29 |
| 2661.149 | 18 | Q9H6S3 | K.HSPTSEPTPPK HSPTSEPT[181.  | 3 | 0.031     | 0.031    | 0.003     | 0 | 20.67 | 18 | 21  | 4  | 715  | 1.15  |
| 2661.149 | 22 | Q9H6S3 | K.HSPTSEPTPPK HS[166.9984]   | 3 | 0.316     | 0.016    | 0.003     | 0 | 23.51 | 18 | 24  | 5  | 715  | 1.15  |
| 2803.934 | 19 | Q9H6V2 | R.TCERPAEDG TC[160.0307]E    | 3 | 1.028     | 0.003    | 0.001     | 0 | 28.6  | 16 | 29  | 1  | 383  | 0.49  |
| 1714.688 | 11 | Q9H6Z4 | R.SPSEAADEVC S[166.9984]P    | 2 | 2.119     | 3.50E-06 | 0.002     | 0 | 61.08 | 19 | 61  | 1  | 567  | 1.23  |
| 1714.688 | 11 | Q9H6Z4 | R.SPSEAADEVC SPS[166.9984]   | 2 | 2.172     | 1.50E-07 | 0.002     | 0 | 74.91 | 19 | 75  | 2  | 567  | 1.23  |
| 2647.025 | 18 | Q9H6Z4 | R.SAGGSSPEGC SAGGSSPEGC      | 2 | 1.206     | 0.002    | 0.002     | 1 | 30.42 | 16 | 57  | 2  | 567  | 0.79  |
| 1651.689 | 7  | Q9H706 | K.SGSPDLSEDC S[166.9984]     | 2 | -0.596    | 0.012    | 0.004     | 0 | 23.59 | 17 | 24  | 1  | 876  | 2.11  |
| 1399.646 | 7  | Q9H788 | R.TLSSSAQEDIII TLS[166.9984] | 2 | 2.159     | 9.60E-07 | 0.002     | 0 | 66.5  | 19 | 66  | 1  | 454  | 1.48  |
| 1421.649 | 7  | Q9H7D0 | K.APEPDLMSPT APEPDLMS[166    | 2 | -0.944    | 0.025    | 0.002     | 1 | 21.11 | 18 | 21  | 3  | 1870 | 1.75  |
| 1421.649 | 8  | Q9H7D0 | K.APEPDLMSPT APEPDLMSPT[1    | 2 | -1.062    | 0.033    | 0.002     | 1 | 19.91 | 18 | 20  | 2  | 1870 | 1.75  |
| 1636.74  | 14 | Q9H7F0 | K.LVHDSLEDLQI LVHDS[166.998  | 2 | 2.119     | 9.30E-06 | 0.002     | 0 | 55.94 | 18 | 56  | 3  | 1226 | 1.51  |
| 2443.08  | 19 | Q9H7L9 | K.RPASPSPPEHI RPAS[166.9984  | 3 | 0.853     | 0.005    | 0.004     | 0 | 28.85 | 18 | 29  | 1  | 328  | 1.5   |
| 2127.974 | 10 | Q9H7N4 | R.QRSPSPAPAP QRS[166.9984]   | 2 | -0.091    | 0.004    | 0.002     | 1 | 31.64 | 20 | 119 | 8  | 1312 | 1.03  |
| 2118.941 | 10 | Q9H7N4 | K.AAAPPPALPI AAPPPAL[18      | 2 | 1.307     | 1.50E-04 | 8.00E-04  | 0 | 43.62 | 18 | 119 | 8  | 1312 | 0.36  |
| 2040.916 | 10 | Q9H7N4 | K.TPEVFLPEEA T[181.014]PEV   | 2 | 0.362     | 0.001    | 0.003     | 0 | 34.17 | 18 | 71  | 7  | 1312 | 1.55  |
| 1417.527 | 7  | Q9H7N4 | K.GAEETSWSGI GAEETSWS[16     | 2 | -0.676    | 0.014    | 0.004     | 0 | 21.78 | 16 | 112 | 8  | 1312 | 2.81  |
| 2434.092 | 14 | Q9H7N4 | K.EAASSSSGTQ EAASSSSGTQP     | 3 | 0.434     | 0.012    | 0.003     | 1 | 24.69 | 18 | 119 | 7  | 1312 | 1.24  |
| 2434.092 | 6  | Q9H7N4 | K.EAASSSSGTQ EAASSSSGTQP     | 3 | 0.119     | 0.025    | 0.003     | 1 | 21.55 | 18 | 115 | 9  | 1312 | 1.24  |
| 1863.874 | 6  | Q9H8G2 | K.SVNEILGLAES SVNEILGLAES    | 2 | 0.38      | 0.002    | 0.003     | 0 | 35.33 | 19 | 125 | 3  | 361  | 1.39  |
| 2336.842 | 14 | Q9H8G2 | K.ILEGDNGMDSI ILEGDNGMDS     | 2 | 2.159     | 5.70E-08 | 4.00E-04  | 0 | 74.74 | 15 | 145 | 3  | 361  | 0.18  |
| 1720.727 | 9  | Q9H8G2 | R.STDSSVSGSI ST[181.014]DS   | 2 | 2.159     | 3.70E-06 | 0.002     | 0 | 59.53 | 18 | 145 | 3  | 361  | 1.34  |
| 2186.797 | 13 | Q9H8M2 | R.EREHCDETEG EREHC[160.03    | 3 | 0.011     | 0.029    | 0.002     | 1 | 18.44 | 16 | 18  | 1  | 597  | 0.99  |
| 1374.594 | 6  | Q9H8M9 | K.NVFTSAEELI NVFTS[166.998   | 2 | -0.308    | 0.006    | 0.002     | 0 | 29.45 | 20 | 29  | 1  | 152  | 1.62  |
| 1281.536 | 5  | Q9H8Y5 | K.EALGQNEESP EALGQNEES[16    | 2 | -0.998    | 0.03     | 0.002     | 0 | 20.57 | 18 | 21  | 2  | 726  | 1.55  |
| 1518.684 | 9  | Q9H910 | K.TSDIFGSPVTA TSDIFGS[166.9  | 2 | 0.248     |          |           |   |       |    |     |    |      |       |

|            |    |        |                                 |        |          |           |   |       |    |     |      |      |       |
|------------|----|--------|---------------------------------|--------|----------|-----------|---|-------|----|-----|------|------|-------|
| 1832.879   | 13 | Q9H8D1 | K.KQSLGEDHVI KQS[166.9984] 3    | -0.086 | 0.043    | 9.00E-04  | 1 | 18.46 | 17 | 18  | 2    | 1191 | 0.46  |
| 2977.168   | 10 | Q9H8M0 | R.MCYQCESEDI MC[160.0307]V 3    | -0.158 | 0.047    | 0.002     | 0 | 16.77 | 16 | 17  | 1    | 779  | 0.61  |
| 1014.525   | 4  | Q9H8M1 | R.KAFTATVYN - KAFTATVYN 2       | -0.745 | 2.019    | -9.00E-04 | 1 | 20.08 | 15 | 20  | 2    | 224  | -0.85 |
| 3459.58    | 23 | Q9HC35 | K.APVSSSTESVIC APVSSSTESVICSI 3 | 1.291  | 0.002    | 0.002     | 0 | 32.74 | 17 | 33  | 2    | 981  | 0.47  |
| 3539.546   | 8  | Q9HC35 | K.APVSSSTESVIC APVSSSTESVICSI 4 | -0.295 | 0.042    | 0.004     | 0 | 18.56 | 17 | 19  | 3    | 981  | 1.27  |
| 2373.039   | 16 | Q9HC52 | R.RQSDLVQCC RQSD[166.9984] 3    | 1.291  | 0.002    | 0.003     | 1 | 33.88 | 18 | 43  | 3    | 389  | 1.13  |
| 1408.6     | 11 | Q9HC52 | R.HGSGPPSSGG HGSI[166.9984] 2   | -0.774 | 0.02     | 0.003     | 0 | 23.81 | 19 | 48  | 3    | 389  | 1.97  |
| 2373.039   | 9  | Q9HC52 | R.RQSDLVQCC RQSDLVQCC[16 3      | 0.296  | 0.017    | 0.003     | 1 | 23.28 | 18 | 43  | 3    | 389  | 1.13  |
| 2373.039   | 16 | Q9HC52 | R.RQSDLVQCC RQSDLVQCC[16 3      | 0.904  | 0.004    | 0.003     | 1 | 29.39 | 18 | 47  | 4    | 389  | 1.13  |
| 2373.039   | 13 | Q9HC52 | R.RQSDLVQCC RQSDLVQCC[16 3      | 0.772  | 0.006    | 0.003     | 1 | 28.07 | 18 | 52  | 4    | 389  | 1.13  |
| 2244.033   | 14 | Q9HC77 | K.RASPNLSEAI RAS[166.9984] 3    | -0.148 | 0.044    | 0.003     | 1 | 18.84 | 18 | 19  | 3    | 1338 | 1.51  |
| 1296.583   | 6  | Q9HCDS | R.SSTDSLPGPIS SST[181.014]D 2   | -0.537 | 0.011    | 0.002     | 0 | 25.18 | 18 | 25  | 1    | 579  | 1.37  |
| 1296.583   | 6  | Q9HCDS | R.SSTDSLPGPIS SST[166.9984]T 2  | -0.65  | 0.014    | 0.002     | 0 | 24.05 | 18 | 24  | 2    | 579  | 1.37  |
| 1910.784   | 12 | Q9HCDS | R.DCSYGAVTSP DC[160.0307]S 2    | 2.159  | 9.00E-07 | 0.001     | 0 | 64.27 | 16 | 99  | 4    | 1990 | 0.75  |
| 2343.98    | 12 | Q9HCDS | R.SCDLSPVSP SC[160.0307]D 2     | 2.159  | 1.70E-05 | 0.002     | 0 | 51.64 | 17 | 99  | 4    | 1990 | 0.94  |
| 1910.784   | 10 | Q9HCDS | R.DCSYGAVTSP DC[160.0307]S 2    | 1.944  | 1.30E-06 | 0.001     | 0 | 62.59 | 16 | 63  | 4    | 1990 | 0.75  |
| 1910.784   | 9  | Q9HCDS | R.DCSYGAVTSP DC[160.0307]S 2    | 2.021  | 9.10E-08 | 0.001     | 0 | 74.2  | 16 | 92  | 4    | 1990 | 0.75  |
| 1910.784   | 8  | Q9HCDS | R.DCSYGAVTSP DC[160.0307]S 2    | 2.025  | 2.60E-06 | 0.001     | 0 | 59.68 | 16 | 66  | 4    | 1990 | 0.75  |
| 2343.98    | 9  | Q9HCDS | R.SCDLSPVSP SC[160.0307]D 3     | 0.322  | 0.017    | 0.003     | 0 | 22.58 | 17 | 66  | 4    | 1990 | 1.15  |
| 1753.8     | 14 | Q9HCE3 | R.AADKSPESQ AADKSI[166.9984] 3  | 0.211  | 0.021    | 5.00E-04  | 1 | 23.43 | 19 | 39  | 2    | 1301 | 0.3   |
| 1670.851   | 15 | Q9HCE3 | R.AADKSPESQ AADKSI[166.9984] 2  | -1.01  | 0.029    | 0.002     | 0 | 20.45 | 18 | 34  | 3    | 2581 | 0.97  |
| 2009.968   | 12 | Q9HCE3 | K.SPEETATQVP S[166.9984]PE 2    | 1.269  | 1.70E-04 | 0.003     | 0 | 42.24 | 17 | 50  | 3    | 2581 | 1.28  |
| 1349.61    | 14 | Q9HCE3 | R.HSSLGQSLSP HSSLGQSLSI[16 2    | -0.819 | 0.021    | 0.002     | 0 | 26.36 | 22 | 26  | 1    | 1747 | 1.66  |
| 2175.949   | 10 | Q9HCE3 | R.RPLEAGSPGC RPLEAGSI[166.9 3   | -0.053 | 0.035    | 0.001     | 0 | 19.8  | 18 | 20  | 1    | 1045 | 0.57  |
| 2356.857   | 13 | Q9HCN4 | R.GTLEDEDEEA GTLEDEDEEAD 3      | 1.224  | 9.50E-05 | 0.002     | 0 | 42.89 | 15 | 43  | 1    | 374  | 1.08  |
| 2356.857   | 7  | Q9HCN4 | R.GTLEDEDEEA GTLEDEDEEAD 3      | 0.316  | 0.016    | 0.002     | 0 | 20.52 | 15 | 21  | 1    | 374  | 1.08  |
| 1066.54    | 4  | Q9HD20 | R.DRLSQVLR.D DRLSI[166.9984] 2  | -1.056 | 0.034    | 0.001     | 1 | 22    | 20 | 22  | 2    | 1204 | 1.16  |
| 2172.044   | 11 | Q9HDC9 | R.RPLRPQVTD RPLRPQVVT[18 3      | 0.307  | 0.018    | 0.002     | 0 | 23.29 | 17 | 22  | 1    | 416  | 1.07  |
| 1226.491   | 4  | Q9NP61 | K.AISSDMYFGR AISS[166.9984] 2   | -1.07  | 0.038    | 0.001     | 0 | 16.85 | 15 | 23  | 2    | 516  | 1.12  |
| 1226.491   | 5  | Q9NP61 | K.AISSDMYFGR AISS[166.9984]S 2  | -0.661 | 0.014    | 0.002     | 0 | 20.94 | 15 | 23  | 2    | 516  | 1.12  |
| 972.455    | 5  | Q9NP66 | K.SPLTYVRF S[166.9984]PLT 2     | -0.835 | 0.022    | 5.00E-04  | 0 | 24.2  | 20 | 24  | 1    | 347  | 0.5   |
| 1653.712   | 10 | Q9NP87 | R.VGSPGDAAS VGS[166.9984] 2     | 0.07   | 0.002    | 0.002     | 0 | 32.25 | 19 | 32  | 1    | 494  | 0.97  |
| 1653.712   | 6  | Q9NP87 | R.VGSPGDAAS VGS[166.9984] 2     | 0.363  | 0.001    | 0.002     | 0 | 35.18 | 19 | 35  | 1    | 494  | 0.97  |
| 1747.863   | 10 | Q9NPF5 | K.TIHDVVGAPL DTIHDVVGAPLT 2     | 0.446  | 0.001    | 0.003     | 0 | 30.01 | 18 | 35  | 1    | 467  | 1.77  |
| 1733.621   | 16 | Q9NPG3 | R.DRISDEEEDI DRIC[160.0307] 2   | 0.873  | 4.20E-04 | 0.001     | 1 | 36.28 | 15 | 36  | 3    | 1134 | 0.78  |
| 1723.753   | 10 | Q9NPH3 | R.RSSSDEOGLS RSS[166.9984]S 2   | -0.193 | 0.005    | 0.001     | 1 | 27.62 | 17 | 28  | 1    | 570  | 0.8   |
| 1723.753   | 10 | Q9NPH3 | R.RSSSDEOGLS RSS[166.9984]SS 2  | -0.94  | 0.03     | 0.001     | 1 | 20.15 | 17 | 20  | 1    | 570  | 0.8   |
| 1723.753   | 10 | Q9NPH3 | R.RSSSDEOGLS RSS[166.9984] 2    | -0.206 | 0.006    | 0.001     | 1 | 27.5  | 17 | 28  | 1    | 570  | 0.8   |
| 1567.652   | 9  | Q9NPH3 | R.RSSSDEOGLSY S[166.9984]SS 2   | -0.074 | 0.004    | 0.002     | 0 | 29.84 | 18 | 30  | 1    | 570  | 1.4   |
| 1707.795   | 6  | Q9NPI6 | K.ASSPSPLTIGT ASS[166.9984] 2   | -0.253 | 0.005    | 0.002     | 0 | 28.02 | 18 | 30  | 2    | 582  | 0.99  |
| 1707.795   | 10 | Q9NPI6 | K.ASSPSPLTIGT ASS[166.9984] 2   | -1.057 | 0.039    | -0.002    | 0 | 19.98 | 18 | 30  | 2    | 582  | -1.47 |
| 754.349    | 4  | Q9NPR2 | R.LGSEIR.D LGS[166.9984] 2      | 0.134  | 0.002    | 0.001     | 0 | 35.87 | 22 | 36  | 2    | 832  | 1.63  |
| 1521.637   | 11 | Q9NQ39 | K.AEAGAGSATI AEAGAGSI[166. 2    | 2.159  | 4.50E-06 | 0.003     | 0 | 59.42 | 18 | 59  |      | 2.14 |       |
| 1440.6     | 10 | Q9NQ55 | R.VGSGDEEAS VGS[166.9984] 2     | 0.402  | 0.001    | 0.002     | 0 | 32.57 | 16 | 33  | 1    | 473  | 1.51  |
| 1509.735   | 6  | Q9NQ84 | K.VPSEGAYDIL VPSEGAY[243. 2     | 1.397  | 1.20E-04 | 0.002     | 0 | 43.52 | 17 | 44  | 2    | 441  | 1.62  |
| 1245.522   | 7  | Q9NQ84 | K.AFSMDEPVAJ AFS[166.9984] 2    | -0.655 | 0.014    | 0.002     | 0 | 21.98 | 16 | 61  | 2    | 441  | 1.93  |
| 1300.567   | 7  | Q9NQ84 | K.EDEVSEKAI EDEVSI[166.99 2     | -0.639 | 0.015    | 0.002     | 1 | 24.14 | 18 | 24  | 2    | 1192 | 1.94  |
| 1375.541   | 6  | Q9NQ84 | K.FGNSINLEADI FGS[166.9984] 2   | -0.654 | 0.013    | 0.002     | 0 | 22    | 16 | 22  | 1    | 134  | 1.38  |
| 1004.492   | 6  | Q9NQ87 | R.IAQVSPGRPL IAQVSI[166.998 2   | 0.886  | 3.60E-04 | 0.001     | 0 | 41.41 | 20 | 41  | 1    | 918  | 1.24  |
| 1653.716   | 8  | Q9NQV6 | K.SDDGTQDLH S[166.9984]DD 2     | -0.811 | 0.022    | 0.003     | 0 | 22.44 | 18 | 22  | 1    | 1147 | 1.8   |
| 1973.827   | 7  | Q9NQW6 | K.RCSDNTEVEH RC[160.0307]SI 3   | 0.109  | 0.029    | 0.002     | 1 | 21.41 | 18 | 115 | 8    | 1124 | 1.27  |
| 1726.747   | 8  | Q9NQW6 | K.QNSVQEQG QNS[166.9984] 2      | 1.783  | 4.60E-05 | 3.00E-04  | 0 | 49.38 | 19 | 115 | 8    | 1124 | 0.19  |
| 1978.775   | 11 | Q9NQW6 | R.QPLSEASNOQ QPLSEASNOQP 2      | 1.382  | 1.30E-04 | 0.001     | 0 | 45.37 | 19 | 115 | 8    | 1124 | 0.7   |
| 1288.528   | 5  | Q9NQW6 | K.ASPQSEFMPS AS[166.9984]PI 2   | -1.088 | 0.043    | 0.002     | 0 | 17.67 | 16 | 115 | 8    | 1124 | 1.63  |
| 835.432    | 7  | Q9NQW6 | K.TPISPLK.T TPISI[166.9984] 2   | 0.155  | 0.002    | 8.00E-04  | 0 | 34.1  | 20 | 115 | 8    | 1124 | 0.99  |
| 1973.827   | 11 | Q9NQW6 | K.RCSDNTEVEH RC[160.0307]SI 3   | 0.914  | 0.004    | 0.002     | 1 | 29.49 | 18 | 117 | 8    | 1124 | 1.27  |
| 2171.213   | 17 | Q9NQZ2 | R.OSQQAEEEEE OSQQAEEEEE 3       | -0.034 | 0.039    | 0.002     | 1 | 20.02 | 18 | 20  | 2    | 479  | 0.85  |
| 2227.851   | 18 | Q9NR09 | K.LEGSDOLLEI LEGSDOLLEDS 3      | 0.065  | 0.03     | 0.002     | 0 | 18.97 | 16 | 19  | 2    | 4857 | 0.98  |
| 1221.53    | 6  | Q9NR19 | R.SWSPPEVSR SWS[166.9984] 2     | -0.825 | 0.021    | 0.001     | 0 | 22.3  | 18 | 22  | 2    | 701  | 0.85  |
| 1323.546   | 7  | Q9NR30 | K.EEPSQNDISF EEPSQNDIS[16 2     | -0.081 | 0.004    | 0.002     | 0 | 27.74 | 16 | 100 | 5    | 783  | 1.75  |
| 1451.641   | 12 | Q9NR30 | K.EEPSQNDISF EEPSQNDIS[16 2     | 0.024  | 0.003    | 0.003     | 1 | 29.79 | 17 | 100 | 6    | 783  | 1.83  |
| 1791.768   | 9  | Q9NR30 | K.NEPESEEDF NEPESI[166.998 2    | 2.159  | 1.90E-05 | 0.002     | 0 | 52.88 | 18 | 100 | 6    | 783  | 1.3   |
| 2746.205   | 10 | Q9NRA8 | K.ASEENLSSSS ASEENLSSSSVI 3     | 1.2    | 0.002    | 0.002     | 1 | 34.63 | 19 | 35  | 1    | 985  | 0.89  |
| 2981.104   | 11 | Q9NRF9 | R.DEDNDEDEEI DEDNDEDEERL 3      | 0.33   | 0.014    | 0.002     | 1 | 20.65 | 15 | 21  | 1    | 147  | 0.79  |
| 2443.791   | 14 | Q9NRG0 | K.REEEDENDNI REEEDENDND 3       | 1.224  | 1.80E-04 | 0.005     | 1 | 37.41 | 13 | 37  | 3    | 131  | 2.24  |
| 855.412    | 6  | Q9NRG9 | R.FSPVLGR.A FS[166.9984]PA 2    | 0.407  | 0.001    | 6.00E-04  | 0 | 33.62 | 17 | 34  | 1    | 546  | 0.67  |
| 1503.732   | 7  | Q9NRL2 | K.RQSPPEPVTI RQSP[166.9984] 3   | 0.495  | 0.011    | 0.001     | 1 | 25.27 | 18 | 64  | 10   | 1556 | 0.65  |
| 2139.806   | 12 | Q9NRL2 | K.ELDQDMVTEI ELDQDMVT[18 3      | 0.142  | 0.024    | 0.003     | 0 | 19.74 | 16 | 64  | 10   | 1556 | 1.4   |
| 1705.779   | 9  | Q9NRL3 | R.SLEINGAVEP S[166.9984]LEL 2   | 1.077  | 2.40E-04 | 0.002     | 0 | 43.32 | 20 | 43  | 2    | 753  | 0.92  |
| 1481.554   | 8  | Q9NRX5 | R.SDGSLEDGDC S[166.9984]DG 2    | -0.833 | 0.022    | 0.002     | 0 | 19.22 | 15 | 19  | 1    | 453  | 1.53  |
| 1481.554   | 6  | Q9NRX5 | R.SDGSLEDGDC SDGS[166.9984] 2   | -0.211 | 0.005    | 0.003     | 0 | 25.44 | 15 | 25  | 1    | 453  | 1.8   |
| 1659.726   | 8  | Q9NRV4 | R.TSFSVGSDDC TSFVGS[166.9 2     | 1.21   | 1.90E-04 | 0.003     | 0 | 42.65 | 18 | 49  | 2    | 1499 | 1.7   |
| 1210.51    | 7  | Q9NRV4 | K.NSLSDPNIDR. NS[166.9984]L 2   | -0.044 | 0.003    | 0.001     | 0 | 30.11 | 18 | 50  | 2    | 1499 | 1.04  |
| 2208.835   | 14 | Q9NRV4 | K.AQNSGSGNG AQNSGSGNGSI[2 2     | 1.345  | 1.50E-04 | 0.003     | 0 | 41.99 | 16 | 66  | 3    | 1499 | 1.42  |
| 1942.748   | 9  | Q9NS25 | R.SVPCESNEAN S[166.9984]VP 2    | 2.134  | 2.10E-05 | 0.002     | 0 | 50.89 | 17 | 129 | 4    | 103  | 0.89  |
| 1862.782   | 6  | Q9NS25 | R.SVPCESNEAN SVP[160.0307] 2    | -0.477 | 0.01     | 0.003     | 0 | 25.78 | 18 | 82  | 5    | 103  | 1.69  |
| 1848.772   | 14 | Q9NS25 | K.TMPETPTGDI TMPET[181.01 2     | -0.642 | 0.013    | 0.002     | 0 | 24.13 | 18 | 82  | 5    | 103  | 1.28  |
| 2098.849   | 9  | Q9NS25 | K.RSVPCESENEA RS[166.9984]VI 3  | 0.807  | 0.005    | 0.004     | 1 | 27.4  | 17 | 68  | 4    | 103  | 2.01  |
| 1603.722   | 14 | Q9NS25 | K.RTSPPELVNDI RTS[166.9984] 3   | 1.291  | 3.50E-04 | 0.002     | 1 | 40.82 | 19 | 129 |      | 1    |       |
| 1271.624   | 6  | Q9NS25 | K.TSSESTILVVR. TSES[166.9984] 2 | -0.75  | 0.017    | 9.00E-04  | 0 | 24.04 | 19 | 51  | 0.74 |      |       |
| 1961.831   | 14 | Q9NS87 | R.QLEHVMDSA. QLEHVMDSAE 3       | 0.209  | 0.019    | 0.002     | 0 | 22.46 | 18 | 22  | 2    | 1388 | 0.8   |
| 1367.584   | 7  | Q9NS91 | K.NDLQDTEISPI NDLQDTEIS[16 2    | 1.659  | 6.80E-05 | 0.002     | 0 | 47.14 | 18 | 47  | 2    | 495  | 1.21  |
| 1039.53    | 5  | Q9NSK0 | R.RSSELLVR.K RSS[166.9984] 2    | -1.116 | 0.037    | 0.001     | 1 | 21.37 | 20 | 21  | 3    | 619  | 1.01  |
| 2093.856   | 15 | Q9NTI5 | K.RGHTASEDE RHGHTASESI[166 3    | 0.214  | 0.021    | 0.003     | 1 | 21.46 | 17 | 220 | 13   | 1447 | 1.25  |
| 1937.755   | 19 | Q9NTI5 | R.GHTASESDEC GHTAS[166.99 2     | 2.067  | 2.40E-05 | 0.001     | 0 | 51.22 | 18 | 220 | 13   | 1447 | 0.63  |
| 2036.81    | 11 | Q9NTI5 | R.AESPESAIES AES[166.9984] 2    | 1.299  | 1.60E-04 | 0.001     | 0 | 41.54 | 16 | 214 | 10   | 1447 | 0.6   |
| 1964.848   | 19 | Q9NTI5 | K.EDILENEDEQI EDILENEDEQNS 2    | -0.194 | 0.005    | 0.001     | 1 | 28.61 | 18 | 220 | 13   | 1447 | 0.65  |
| 1874.759</ |    |        |                                 |        |          |           |   |       |    |     |      |      |       |

|          |    |        |                                 |        |          |           |   |       |    |     |    |      |       |
|----------|----|--------|---------------------------------|--------|----------|-----------|---|-------|----|-----|----|------|-------|
| 2265     | 17 | Q9NUE0 | K.DCEYQOISPG DC[160.0307]E 3    | 0.747  | 0.006    | 0.004     | 0 | 27.81 | 18 | 28  | 2  | 388  | 1.57  |
| 1605.698 | 6  | Q9NUL3 | K.GSSPTPCSPA GSS[166.9984]I 2   | -0.723 | 0.015    | 0.002     | 0 | 23.3  | 18 | 23  | 2  | 570  | 0.96  |
| 1604.677 | 8  | Q9NUQ3 | R.NLVSPPACTQ NLV[166.9984] 2    | 1.383  | 1.20E-04 | 0.001     | 0 | 45.38 | 19 | 45  | 3  | 528  | 0.86  |
| 1604.677 | 8  | Q9NUQ3 | R.NLVSPPACTQ NLVSPAYC[160] 2    | -0.959 | 0.026    | 0.002     | 0 | 21.95 | 19 | 83  | 4  | 528  | 1.11  |
| 1604.677 | 6  | Q9NUQ3 | R.NLVSPPACTQ NLVSPAYC[160] 2    | 0.175  | 0.002    | 0.002     | 0 | 33.33 | 19 | 72  | 4  | 528  | 1.11  |
| 1353.568 | 11 | Q9NUQ6 | K.SQSGNEAEI SQSG[166.9984] 2    | -1.101 | 0.04     | 0.004     | 0 | 19.54 | 18 | 20  | 1  | 558  | 2.6   |
| 2096     | 10 | Q9NUQ9 | R.INNVPAEAGEN INNVPAEAGENE 3    | 0.612  | 0.009    | 0.003     | 0 | 25.46 | 17 | 25  | 1  | 324  | 1.27  |
| 1523.71  | 8  | Q9NV56 | K.VLTANSNPSSI VLTANSNPS[16] 2   | 0.667  | 7.40E-04 | 0.003     | 0 | 37.2  | 18 | 37  | 1  | 204  | 1.78  |
| 1523.71  | 7  | Q9NV56 | K.VLTANSNPSSI VLTANSNPS[1] 2    | 0.29   | 0.002    | 0.003     | 0 | 33.44 | 18 | 33  | 1  | 204  | 1.78  |
| 1170.54  | 7  | Q9NV11 | K.TIETSPSLR.N TIETS[166.9984] 2 | -0.915 | 0.026    | 0.003     | 0 | 21.38 | 18 | 21  | 2  | 1328 | 2.4   |
| 1729.655 | 6  | Q9NVM6 | R.QAQAESEI QAQAE[166.2] 2       | 0.49   | 0.001    | 0.003     | 0 | 33.45 | 16 | 33  | 1  | 304  | 1.74  |
| 2482.055 | 18 | Q9NVR2 | R.STQJENQHQE STQJENQHQGA 3      | 1.291  | 2.30E-04 | -0.001    | 0 | 42.72 | 19 | 43  | 2  | 710  | -0.39 |
| 3539.369 | 11 | Q9NVU0 | K.EEVPSEGEI EEPVS[166.998] 3    | 0.075  | 0.027    | 0.003     | 0 | 20.07 | 17 | 20  | 1  | 708  | 0.75  |
| 1445.583 | 16 | Q9NVU7 | K.YIIDSDEEPR YIIDS[166.998] 2   | 0.371  | 0.001    | 0.002     | 0 | 33.26 | 17 | 33  | 3  | 687  | 1.48  |
| 1146.511 | 4  | Q9NW64 | K.ATSTSDMLLK ATST[166.9984] 2   | -0.486 | 0.011    | 0.002     | 0 | 23.67 | 16 | 24  | 1  | 420  | 1.4   |
| 1146.511 | 11 | Q9NW64 | K.ATSTSDMLLK ATST[181.014] 2    | 0.14   | 0.002    | 0.002     | 0 | 29.94 | 16 | 30  | 2  | 420  | 1.4   |
| 1561.642 | 11 | Q9NW68 | K.KGSSTDISEV KGS[166.9984] 2    | 1.325  | 1.60E-04 | 0.002     | 1 | 40.8  | 15 | 41  | 1  | 430  | 1.06  |
| 1561.642 | 9  | Q9NW68 | K.KGSSTDISEV KGSST[181.014] 3   | -0.073 | 0.035    | 0.001     | 1 | 17.64 | 16 | 49  | 3  | 430  | 0.8   |
| 1679.651 | 13 | Q9NW82 | K.TMFAQVESDI TMFAQVES[16] 2     | 2.002  | 3.50E-05 | 0.002     | 0 | 49.57 | 17 | 50  | 4  | 654  | 1.25  |
| 4021.623 | 7  | Q9NW97 | R.QGEDLAHVQ QGEDLAHVQH 4        | 0.11   | 0.024    | 0.001     | 0 | 20.67 | 17 | 21  | 1  | 253  | 0.24  |
| 4021.623 | 11 | Q9NW97 | R.QGEDLAHVQ QGEDLAHVQH 4        | -0.045 | 0.035    | 0.001     | 0 | 19.16 | 17 | 19  | 2  | 253  | 0.24  |
| 1405.655 | 9  | Q9NWH9 | K.SPGHMWLDL S[166.9984]PGI 2    | 2.159  | 3.50E-07 | 1.00E-04  | 0 | 71.28 | 19 | 81  | 9  | 1034 | 0.05  |
| 1338.557 | 6  | Q9NWH9 | K.DGQDAIAQSF DGQDAIAQSI 2       | -0.205 | 0.005    | 0.003     | 0 | 27.5  | 17 | 81  | 9  | 1034 | 2.47  |
| 2272.926 | 6  | Q9NWH9 | K.DCELENQEAH DC[160.0307]E 3    | 0.017  | 0.035    | 0.003     | 0 | 19.51 | 17 | 77  | 10 | 1034 | 1.48  |
| 1140.509 | 6  | Q9NWQ4 | K.SPSSEWLV.R.T S[166.9984]PSS 2 | 0.45   | 0.001    | 1.00E-04  | 0 | 40.05 | 23 | 40  | 2  | 482  | 0.00  |
| 1935.734 | 7  | Q9NWQ8 | K.EGGEAEESAT EGGGEAEESATD 2     | -0.006 | 0.004    | 0.003     | 0 | 27.49 | 15 | 27  | 1  | 432  | 1.51  |
| 1733.701 | 19 | Q9NWQ8 | K.ENDYESIDL ENDY[243.029] 2     | 1.676  | 6.00E-05 | 0.002     | 0 | 46.29 | 17 | 91  | 2  | 432  | 1.05  |
| 2641.141 | 19 | Q9NWS9 | K.TEPLGSPHP TEEPLGS[166.9] 3    | 0.442  | 0.013    | 0.002     | 0 | 25.76 | 19 | 26  | 1  | 450  | 0.81  |
| 2641.141 | 23 | Q9NWS9 | K.TEPLGSPHP TEEPLGSPHPS[3] 3    | 1.291  | 0.001    | 0.002     | 0 | 36.36 | 19 | 36  | 1  | 450  | 0.81  |
| 2641.141 | 19 | Q9NWS9 | K.TEPLGSPHP TEEPLGSPHPSG 3      | 0.597  | 0.009    | 0.002     | 0 | 27.33 | 19 | 27  | 1  | 450  | 0.81  |
| 2186.872 | 12 | Q9NWX8 | R.SEGEAEASA SEGEAEASAD 2        | 0.598  | 8.80E-04 | 0.002     | 0 | 35.53 | 17 | 36  | 1  | 329  | 0.96  |
| 2186.872 | 17 | Q9NWX8 | R.SEGEAEASA SEGEAEASAD 2        | 1.224  | 2.10E-04 | 0.002     | 0 | 41.77 | 17 | 41  | 1  | 329  | 0.96  |
| 2186.872 | 15 | Q9NWX8 | R.SEGEAEASA SEGEAEASAD 2        | 1.259  | 1.90E-04 | 0.002     | 0 | 42.14 | 17 | 42  | 1  | 329  | 0.96  |
| 1406.704 | 13 | Q9NX40 | K.KLENSPLGEAI KLENS[166.998] 2  | 2.159  | 8.40E-07 | 0.001     | 1 | 65.87 | 18 | 87  | 2  | 245  | 1.02  |
| 1278.609 | 6  | Q9NX40 | K.KLENSPLGEAI KLENS[166.9984] 2 | 0.791  | 4.60E-04 | 0.002     | 0 | 39.46 | 19 | 87  | 2  | 245  | 1.24  |
| 1655.684 | 9  | Q9NX63 | R.YSGAYGASV YS[166.9984]G 2     | 2.116  | 2.20E-05 | 0.002     | 0 | 51.71 | 18 | 52  | 1  | 227  | 1.26  |
| 1394.599 | 9  | Q9NXC5 | R.GFSQYGVSG GFSQYGVSGS[1] 2     | -0.036 | 0.004    | 0.002     | 0 | 29.19 | 17 | 29  | 1  | 875  | 1.08  |
| 1394.599 | 13 | Q9NXC5 | R.GFSQYGVSG GFSQYGVSGSP 2       | -0.237 | 0.006    | 0.002     | 0 | 27.18 | 17 | 27  | 1  | 875  | 1.08  |
| 2056.871 | 21 | Q9NY27 | K.NHSDSSTSEI NHSDSSTSESEV 2     | 2.159  | 4.50E-09 | 9.00E-04  | 0 | 90.05 | 19 | 101 | 3  | 417  | 0.41  |
| 2056.871 | 19 | Q9NY27 | K.NHSDSSTSEI NHSDSSTSESEV 3     | 1.342  | 8.80E-04 | 0.002     | 0 | 37.25 | 19 | 113 | 3  | 417  | 0.9   |
| 1866.755 | 6  | Q9NY27 | R.MNGVMFPGI MNGVMFPGN 2         | -0.728 | 0.017    | 0.003     | 0 | 22.25 | 17 | 102 | 4  | 417  | 1.59  |
| 2093.885 | 9  | Q9NY61 | R.AGDRNSEDD AGDRNS[166.9] 2     | 2.159  | 2.10E-05 | 8.00E-04  | 1 | 51.79 | 17 | 52  | 2  | 560  | 0.41  |
| 1541.725 | 12 | Q9NYB0 | K.YLLGDAPVSP YLLGDAPVS[16] 2    | 2.172  | 8.00E-07 | 0.003     | 0 | 65.89 | 17 | 66  | 3  | 399  | 2.08  |
| 1294.561 | 7  | Q9NYB9 | R.NMAPPQSP NMAPPQSS[16] 2       | -1.208 | 0.049    | 0.002     | 0 | 18.47 | 18 | 18  | 1  | 513  | 1.36  |
| 1384.568 | 8  | Q9NYF3 | R.SRSPQCDLDA SR[166.9984]C 2    | -0.475 | 2.009    | 0.002     | 1 | 24.78 | 17 | 25  | 2  | 392  | 1.09  |
| 1909.809 | 19 | Q9NYF8 | K.DTFEHDPSI DTFEHDPSI 3         | 0.046  | 0.028    | 0.002     | 0 | 21.78 | 19 | 195 | 16 | 920  | 1.19  |
| 1989.775 | 14 | Q9NYF8 | K.DTFEHDPSI DTFEHDPSI 2         | 1.235  | 1.70E-04 | 5.00E-04  | 0 | 42.9  | 18 | 195 | 16 | 920  | 1.27  |
| 2001.687 | 10 | Q9NYF8 | K.FNDSGDDT FND[166.9984] 2      | 2.159  | 2.10E-08 | 0.001     | 0 | 77.07 | 13 | 195 | 16 | 920  | 0.63  |
| 1521.683 | 16 | Q9NYF8 | K.KAEGEQES KAEGEQES[1] 2        | 1.347  | 1.30E-04 | 0.002     | 1 | 44.02 | 18 | 195 | 16 | 920  | 1.06  |
| 1237.63  | 5  | Q9NYF8 | R.RIDISPTLR.K RIDIS[166.9984] 2 | -1.165 | 0.049    | 0.002     | 1 | 19.9  | 19 | 195 | 16 | 920  | 1.21  |
| 1879.789 | 4  | Q9NYF8 | R.YSPSQNSPHI Y[243.029]SP 2     | -0.606 | 0.012    | -4.00E-04 | 0 | 23.49 | 17 | 195 | 16 | 920  | -0.2  |
| 1411.629 | 8  | Q9NYF8 | K.DLFDYSPHL DLFYD[166.99] 2     | 0.997  | 3.20E-04 | 0.003     | 0 | 38.52 | 16 | 195 | 16 | 920  | 1.88  |
| 2001.796 | 7  | Q9NYF8 | K.NTPSQSHSI NTPSQSHS[16] 3      | 0.079  | 0.03     | 0.004     | 0 | 21.15 | 18 | 184 | 14 | 920  | 2.16  |
| 1301.589 | 3  | Q9NYF8 | K.STFREESPLR.I STFREES[166.9] 2 | -1.145 | 0.043    | 0.002     | 1 | 19.13 | 18 | 220 | 15 | 920  | 1.82  |
| 1081.529 | 4  | Q9NYF8 | R.IDISPSTLR.K IDIS[166.9984] 1  | 0.319  | 0.005    | 0.001     | 0 | 30.69 | 20 | 203 | 17 | 920  | 1.2   |
| 1879.789 | 14 | Q9NYF8 | R.YSPSQNSPHI YS[166.9984]P 3    | 0.513  | 0.009    | 0.002     | 0 | 24.47 | 17 | 178 | 11 | 920  | 1.03  |
| 1989.775 | 12 | Q9NYF8 | K.DTFEHDPSI DTFEHDPSI 2         | -0.021 | 0.033    | 0.003     | 0 | 20.13 | 18 | 203 | 17 | 920  | 1.43  |
| 1898.793 | 14 | Q9NV10 | K.SHSSPLNPOI S[166.9984]HS 2    | -1.068 | 0.033    | 0.001     | 0 | 19.87 | 18 | 20  | 2  | 1048 | 0.66  |
| 1898.793 | 8  | Q9NV10 | K.SHSSPLNPOI SHSSPS[166.99] 2   | -1.048 | 0.032    | 0.001     | 0 | 20.06 | 18 | 20  | 2  | 1048 | 0.66  |
| 1464.673 | 9  | Q9NYM9 | R.AOSPGAVEI AQS[166.9984] 2     | 1.397  | 1.20E-04 | 0.002     | 0 | 46.52 | 20 | 47  | 1  | 111  | 1.72  |
| 987.43   | 6  | Q9NYQ8 | R.VGASDGVFR VGAS[166.9984] 2    | -0.514 | 0.01     | 0.001     | 0 | 25.41 | 18 | 25  | 2  | 4349 | 0.97  |
| 952.465  | 4  | Q9NYV4 | K.GSPVFLPR.K GS[166.9984]P 2    | -0.563 | 0.011    | 9.00E-04  | 0 | 23.92 | 17 | 24  | 5  | 1490 | 0.95  |
| 903.334  | 4  | Q9NYV4 | K.ETETSEK E TETS[166.998] 2     | -0.955 | 0.025    | -0.001    | 0 | 16    | 13 | 25  | 6  | 1490 | -1.19 |
| 2075.767 | 14 | Q9NZ63 | R.RGDSESEDE RGDSES[166.9] 2     | 0.831  | 4.20E-04 | 0.004     | 1 | 37.86 | 17 | 38  | 2  | 289  | 1.74  |
| 4665.891 | 11 | Q9NZB2 | R.SSPINPAQS QS[166.9984]PI 4    | -0.074 | 0.037    | -5.00E-04 | 0 | 16.62 | 15 | 17  | 2  | 1118 | -0.11 |
| 1773.745 | 13 | Q9NZC9 | K.KPEEMPTACF KPEEMPTAC[1] 3     | 0.13   | 0.025    | 0.001     | 0 | 21.98 | 18 | 22  | 1  | 954  | 0.62  |
| 1922.766 | 10 | Q9NZL4 | K.LLQTCFSSPL LQTC[160.030] 2    | 2.159  | 3.40E-06 | 0.003     | 0 | 60.24 | 18 | 60  | 1  | 362  | 1.35  |
| 1364.657 | 7  | Q9NZM1 | K.GPVGTVSEAC GPVGTVS[166.] 2    | 0.271  | 0.002    | 0.002     | 0 | 33.24 | 18 | 33  | 2  | 2061 | 1.42  |
| 2101.928 | 17 | Q9NZN5 | K.SETIQDITDQ SETIQDITDQSL 2     | 1.592  | 8.60E-05 | 0.002     | 0 | 46.47 | 18 | 46  | 3  | 1544 | 0.75  |
| 1474.599 | 8  | Q9NZN8 | R.TNSMSSSLG TNSMSSSLG[5] 2      | 0.436  | 0.001    | -2.00E-04 | 0 | 34.91 | 18 | 35  | 1  | 540  | -0.12 |
| 2204.909 | 19 | Q9NZT2 | R.KVEEESPGD KVEEES[166.9] 3     | 0.817  | 0.006    | 0.002     | 1 | 26.49 | 16 | 76  | 6  | 677  | 0.88  |
| 2076.814 | 9  | Q9NZT2 | K.VEEEGSPGD VEEEGS[166.99] 2    | 2.159  | 1.50E-05 | 0.002     | 0 | 53.55 | 18 | 76  | 6  | 677  | 0.91  |
| 2142.909 | 15 | Q9NZT2 | R.SQDEAGGH SQDEAGGHG 2          | -0.716 | 0.017    | 0.001     | 0 | 23.39 | 18 | 76  | 6  | 677  | 0.53  |
| 1377.605 | 7  | Q9NZT2 | R.SVEPQDAGPI S[166.9984]VE 2    | -0.506 | 0.011    | 0.002     | 0 | 25.49 | 18 | 76  | 6  | 677  | 1.61  |
| 1573.624 | 7  | Q9P035 | R.WLDESAEM WLDES[166.99] 2      | 2.144  | 2.10E-05 | 0.003     | 0 | 50.99 | 17 | 51  | 1  | 362  | 2.18  |
| 1625.742 | 10 | Q9P035 | R.LESEGETL L[166.9984]E 2       | 1.773  | 5.10E-05 | 0.002     | 0 | 50.27 | 20 | 79  | 2  | 362  | 1.36  |
| 1727.75  | 15 | Q9P040 | K.VAHSKDPGST VAHSDKPGS[16] 3    | 0.692  | 0.007    | 0.002     | 0 | 28.24 | 19 | 28  | 1  | 249  | 1.36  |
| 1762.692 | 8  | Q9P0J4 | K.SENGENAPIY S[166.9984]EN 2    | 0.338  | 0.002    | 0.002     | 0 | 32.93 | 17 | 33  | 1  | 656  | 1.41  |
| 1586.702 | 9  | Q9P0W5 | K.TETSLDPLSP TETSLDPLS[16] 2    | 1.934  | 3.40E-05 | 0.002     | 0 | 49.89 | 18 | 50  | 1  | 487  | 1.44  |
| 1586.702 | 8  | Q9P0W5 | K.TETSLDPLSP TETSLDPLSPM 2      | 2.021  | 2.60E-06 | 0.002     | 0 | 61.07 | 18 | 61  | 1  | 487  | 1.44  |
| 2171.013 | 8  | Q9P1Y6 | R.EASPAQAQ EAS[166.9984] 2      | -0.94  | 0.028    | -2.00E-04 | 1 | 21.15 | 18 | 21  | 5  | 1649 | -0.1  |
| 1884.91  | 16 | Q9P1Y6 | R.LPALGEAHV LPA[166.9984] 3     | 0.776  | 0.005    | 0.002     | 0 | 29.11 | 19 | 31  | 3  | 1649 | 1.03  |
| 1245.482 | 6  | Q9P1Y6 | R.ECSTSLER.I EC[160.0307]S 2    | -0.271 | 0.006    | 0.003     | 0 | 25.84 | 16 | 33  | 4  | 1649 | 2.18  |
| 1031.492 | 7  | Q9P206 | K.GLAGPPASPG GLAGPPAS[166] 2    | 0.914  | 4.00E-04 | 5.00E-04  | 0 | 41.69 | 20 | 89  | 6  | 1035 | 0.46  |
| 2060.017 | 13 | Q9P206 | K.LQLERPVPSET LQLERPVS[166.] 3  | 0.462  | 0.01     | 0.002     | 0 | 24.94 | 18 | 81  | 8  | 1035 | 0.79  |
| 1171.514 | 4  | Q9P206 | R.FSSVSSPQR FSSVSS[166.99] 2    | -1.123 | 0.046    | 4.00E-04  | 0 | 19.32 | 18 | 81  | 8  | 1035 | 0.32  |
| 1351.582 | 6  | Q9P206 | R.CSLHSASPASI C[160.0307]SI 2   | -0.73  | 0.015    | 7.00E-04  | 0 | 23.25 | 18 | 81  | 8  | 1035 | 0.51  |
| 1772.    |    |        |                                 |        |          |           |   |       |    |     |    |      |       |

|          |    |        |                                |        |          |           |   |       |    |     |    |      |       |
|----------|----|--------|--------------------------------|--------|----------|-----------|---|-------|----|-----|----|------|-------|
| 1124.498 | 4  | Q9P2R6 | R.TSPINEDIR.S TS[166.9984]PI 2 | -0.917 | 0.025    | 0.001     | 0 | 20.41 | 17 | 20  | 2  | 1566 | 0.87  |
| 3953.655 | 21 | Q9UB85 | R.CCPEQEEGES [160.0307]C[1 3   | -0.051 | 0.034    | 0.005     | 0 | 19.85 | 18 | 20  | 1  | 411  | 1.3   |
| 3953.655 | 27 | Q9UB85 | R.CCPEQEEGES [160.0307]C[1 3   | 1.256  | 4.60E-04 | 0.005     | 0 | 38.51 | 18 | 39  | 1  | 411  | 1.3   |
| 1251.475 | 9  | Q9UBC2 | R.GSFGAMDDP GS[166.9984]F1 2   | -0.013 | 0.003    | 0.002     | 0 | 28.42 | 16 | 28  | 5  | 864  | 1.62  |
| 1848.795 | 9  | Q9UBF8 | R.SVENLPECGIT S[166.9984]VEI 2 | 0.456  | 0.001    | 0.002     | 0 | 34.11 | 17 | 34  | 2  | 816  | 1.04  |
| 1060.482 | 7  | Q9UBH6 | K.YNQSILSR.R YNQSIS[166.99 2   | -0.703 | 0.018    | 8.00E-04  | 0 | 24.5  | 19 | 24  | 2  | 696  | 0.79  |
| 1060.482 | 5  | Q9UBH6 | K.YNQSILSR.R YNQS[166.9984] 2  | -0.88  | 0.026    | 8.00E-04  | 0 | 22.74 | 19 | 23  | 1  | 696  | 0.79  |
| 2763.904 | 23 | Q9UBL3 | K.DTLEGAGDTS DTLEGAGDTS'E 3    | 1.291  | 5.60E-05 | 0.001     | 0 | 47.38 | 17 | 47  | 3  | 628  | 0.51  |
| 1056.436 | 7  | Q9UBM7 | K.SLDGVTNDR.S [166.9984]DX 2   | -0.895 | 0.024    | 4.00E-04  | 0 | 19.6  | 16 | 20  | 2  | 475  | 0.34  |
| 1571.553 | 10 | Q9UDY2 | R.GSYGSDAEIE GSYGS[166.99 2    | 2.159  | 4.90E-06 | 0.002     | 0 | 55.89 | 15 | 265 | 17 | 1190 | 1.2   |
| 931.356  | 6  | Q9UDY2 | R.SFSPEER.R SFS[166.9984]F 2   | 1.767  | 5.00E-05 | 5.00E-04  | 0 | 45.22 | 15 | 265 | 17 | 1190 | 0.56  |
| 965.376  | 5  | Q9UDY2 | R.AYSPEYR.R AYS[166.9984]J 2   | -0.348 | 0.007    | 7.00E-04  | 0 | 23.07 | 14 | 265 | 17 | 1190 | 0.72  |
| 1318.542 | 11 | Q9UDY2 | R.GRSDQDYER GR[166.9984] 2     | 0.061  | 0.003    | 0.002     | 1 | 29.16 | 16 | 265 | 17 | 1190 | 1.28  |
| 1600.741 | 13 | Q9UDY2 | R.DNSPPPAFKP DNS[166.9984] 2   | 0.083  | 0.003    | 0.002     | 0 | 30.38 | 17 | 265 | 17 | 1190 | 1.39  |
| 1902.896 | 8  | Q9UDY2 | K.VQVAALQASF VQVAALQAS[1 2     | 2.159  | 8.80E-07 | 0.002     | 0 | 66.24 | 18 | 265 | 17 | 1190 | 1.16  |
| 1105.42  | 5  | Q9UDY2 | R.SIDQDYER.A S[166.9984]DC 2   | 0.265  | 0.002    | 3.00E-04  | 0 | 30.2  | 15 | 265 | 17 | 1190 | 0.24  |
| 2509.116 | 25 | Q9UDY2 | R.AASSDQLRDA AAS[166.9984] 3   | 0.557  | 0.009    | 0.002     | 1 | 24.92 | 17 | 170 | 13 | 1190 | 0.85  |
| 1328.527 | 9  | Q9UDY2 | R.SRSWEDSPEF SRS[166.9984] 2   | -1.224 | 0.047    | 1.00E-04  | 1 | 18.3  | 18 | 138 | 17 | 1190 | 0.11  |
| 1408.493 | 12 | Q9UDY2 | R.SRSWEDSPEF SRS[166.9984] 2   | -0.988 | 0.032    | 0.003     | 1 | 18.65 | 16 | 159 | 17 | 1190 | 2     |
| 1400.613 | 8  | Q9UER7 | K.SPMSLSLOISNI S[166.9984]PM 2 | 0.923  | 3.60E-04 | 0.002     | 0 | 38.76 | 17 | 602 | 3  | 740  | 1.44  |
| 1815.783 | 15 | Q9UER7 | K.DGDKSPMSSI DGDGS[166.99 2    | 0.766  | 5.40E-04 | 9.00E-04  | 1 | 37.21 | 17 | 59  | 3  | 740  | 0.49  |
| 2066.685 | 21 | Q9UEW8 | K.TEDGDWEVI TEDGDWEVS[ 2       | 2.159  | 1.40E-05 | 0.002     | 0 | 48.44 | 13 | 48  | 1  | 545  | 0.83  |
| 1451.667 | 10 | Q9UEY8 | K.IEEVLSPEGSP IEEVLS[166.99 2  | 0.111  | 0.002    | 0.004     | 0 | 30.66 | 17 | 31  | 1  | 706  | 2.89  |
| 1490.725 | 6  | Q9UFC0 | K.RPDDVPLSLF RPDVPLSL[1 2      | 2.159  | 1.80E-05 | 0.002     | 0 | 53.48 | 19 | 185 | 6  | 647  | 1.32  |
| 2437.07  | 15 | Q9UFC0 | R.ACASPASQVE AC[160.0307]A 2   | 2.159  | 5.60E-08 | 0.004     | 0 | 77.86 | 18 | 185 | 6  | 647  | 1.68  |
| 1183.524 | 6  | Q9UGU0 | K.ENDTVTISPK ENDTVTIS[166. 2   | -0.703 | 0.015    | 0.002     | 0 | 23.52 | 18 | 24  | 2  | 1960 | 1.09  |
| 1152.566 | 7  | Q9UGU5 | K.ASSVGLVSPQ ASSVGLVLS[166. 2  | -0.356 | 0.007    | 0.001     | 0 | 28.99 | 20 | 29  | 1  | 601  | 1.11  |
| 1803.755 | 11 | Q9UGV2 | R.THSTSSLSGSC THS[166.9984] 2  | 0.962  | 3.10E-04 | 3.00E-04  | 0 | 40.17 | 18 | 48  | 2  | 375  | 0.16  |
| 1803.755 | 8  | Q9UGV2 | R.THSTSSLSGSC THS[181.014] 3   | 0.574  | 0.009    | 0.002     | 0 | 25.06 | 17 | 48  | 2  | 375  | 0.94  |
| 1803.755 | 10 | Q9UGV2 | R.THSTSSLSGSC THS[166.99 3     | 0.31   | 0.017    | 0.002     | 0 | 22.44 | 17 | 29  | 2  | 375  | 0.94  |
| 1884.608 | 8  | Q9UH62 | R.YNDWSDDDC YNDWS[166.99 2     | 2.024  | 2.10E-05 | 0.002     | 0 | 48.44 | 14 | 48  | 1  | 379  | 0.87  |
| 1627.736 | 7  | Q9UH86 | R.ETPHSPGVED ETPHS[166.99 2    | -0.223 | 0.006    | 0.001     | 0 | 28.32 | 18 | 85  | 6  | 759  | 0.6   |
| 1070.503 | 7  | Q9UH86 | R.QWTSLSLR.V QWTSLS[166.9 2    | 0.013  | 0.003    | 0.001     | 0 | 31.68 | 19 | 95  | 5  | 759  | 1.1   |
| 1169.509 | 5  | Q9UH86 | R.ASSLSESSPPK ASS[166.9984] 2  | 1.453  | 1.20E-04 | 0.001     | 0 | 44.08 | 17 | 57  | 4  | 759  | 1.08  |
| 1249.475 | 6  | Q9UH86 | R.ASSLSESSPPK ASS[166.9984] 2  | -0.867 | 0.021    | -8.00E-04 | 0 | 19.86 | 16 | 86  | 8  | 759  | -0.61 |
| 1412.595 | 7  | Q9UH86 | R.SNTENLSQHF SNT[181.014]E 2   | 0.317  | 0.001    | 3.00E-04  | 0 | 32.71 | 17 | 110 | 6  | 759  | 0.2   |
| 1078.398 | 9  | Q9UH87 | R.MFSPMEEK.E MFS[166.9984] 2   | -0.837 | 0.023    | 0.001     | 0 | 22.18 | 18 | 22  | 2  | 1163 | 0.96  |
| 1902.848 | 12 | Q9UH87 | K.VSPASSVDSN VS[166.9984]P 2   | -0.188 | 0.004    | 0.001     | 0 | 29.7  | 19 | 36  | 4  | 1163 | 0.6   |
| 1897.822 | 11 | Q9UH88 | R.SFEVEEVETPI S[166.9984]FEV 2 | 2.159  | 1.70E-07 | 0.003     | 0 | 73.86 | 19 | 95  | 7  | 586  | 1.73  |
| 2053.923 | 8  | Q9UH88 | K.RSFEVEEVETI RS[166.9984]FE 2 | 0.839  | 4.40E-04 | 0.002     | 1 | 39.94 | 19 | 95  | 7  | 586  | 0.82  |
| 1024.471 | 7  | Q9UH88 | R.LGDSGSGPAK LGDS[166.99 2     | 0.009  | 0.003    | 0.001     | 0 | 30.63 | 18 | 158 | 7  | 586  | 1.12  |
| 2053.923 | 7  | Q9UH88 | R.SFEVEEVETPI S[166.9984]FEV 2 | -1.053 | 0.036    | 7.00E-04  | 1 | 21.02 | 19 | 177 | 8  | 586  | 0.33  |
| 2685.182 | 18 | Q9UHF7 | K.ATEETGQAQI ATEETGQAQSG 3     | 1.291  | 1.80E-04 | 0.003     | 0 | 43.22 | 18 | 89  | 3  | 1281 | 1.05  |
| 1929.771 | 8  | Q9UHF7 | K.SPQESTGDPG S[166.9984]PQ 2   | 2.159  | 1.30E-06 | 0.003     | 0 | 62.61 | 16 | 89  | 3  | 1281 | 1.37  |
| 2786.128 | 27 | Q9UHF7 | K.SPQRAEADDI S[166.9984]PQ 3   | 0.203  | 0.02     | 0.002     | 1 | 22.39 | 18 | 23  | 5  | 1281 | 0.8   |
| 1595.67  | 9  | Q9UHF7 | R.GSNEEQVNG GSNEEQVNGS[ 2      | -0.455 | 0.01     | 8.00E-04  | 0 | 23.98 | 16 | 69  | 3  | 1281 | 0.51  |
| 1902.848 | 13 | Q9UHI6 | R.ISLEQPPNGSI ISLEQPPNGS[1 2   | -1.221 | 0.048    | 0.001     | 0 | 19.34 | 19 | 20  | 3  | 824  | 0.6   |
| 1260.533 | 5  | Q9UHI6 | K.YQESPIQIM YQES[166.99 2      | -0.968 | 0.031    | 0.001     | 0 | 17.87 | 15 | 20  | 3  | 824  | 0.88  |
| 1902.848 | 10 | Q9UHI6 | R.ISLEQPPNGSI ISLEQPPNGSDT 2   | -1.179 | 0.044    | 0.001     | 0 | 19.76 | 19 | 18  | 2  | 824  | 0.6   |
| 1420.599 | 11 | Q9UHI6 | K.SYLEGSDNQ SYLEGSS[166.9 2    | -0.475 | 0.009    | 0.001     | 0 | 25.78 | 18 | 26  | 3  | 824  | 0.88  |
| 2086.892 | 19 | Q9UHR4 | K.TPASTPVSGTI TPASTPVSGT[1 3   | 0.464  | 0.013    | 0.003     | 0 | 24.96 | 18 | 73  | 2  | 511  | 1.25  |
| 2006.925 | 13 | Q9UHR4 | K.TPASTPVSGTI TPASTPVSGTPC 2   | 1.924  | 4.20E-05 | 0.002     | 0 | 49.77 | 18 | 99  | 3  | 511  | 0.86  |
| 1667.658 | 11 | Q9UHR5 | K.GGLVSDAYGf GGLVLS[166.99 2   | 2.021  | 6.90E-06 | 0.003     | 0 | 57.24 | 18 | 57  | 3  | 308  | 1.93  |
| 1809.772 | 8  | Q9UHV7 | R.KYSASSGGLC KYS[166.9984]V 2  | 2.172  | 3.40E-07 | 0.002     | 1 | 69.39 | 17 | 70  | 2  | 2174 | 0.87  |
| 1914.855 | 10 | Q9UHV7 | K.IEVDEGFCSPK IEVDEGFC[160. 3  | 0.041  | 0.027    | 0.002     | 0 | 21.76 | 19 | 84  | 3  | 2174 | 1.28  |
| 1406.62  | 7  | Q9UHY1 | K.TPTPEPAEVE TPT[181.014]PTP 2 | -0.934 | 0.027    | 0.002     | 0 | 21.21 | 18 | 21  | 1  | 535  | 1.42  |
| 1406.62  | 7  | Q9UHY1 | K.TPTPEPAEVE TPT[181.014]PTP 2 | -0.216 | 0.005    | 0.002     | 0 | 28.39 | 18 | 28  | 1  | 535  | 1.42  |
| 1368.604 | 8  | Q9UI10 | K.ASPSTAGETP AS[166.9984]P 2   | -0.994 | 0.029    | 0.002     | 0 | 20.61 | 18 | 21  | 1  | 523  | 1.27  |
| 1846.804 | 9  | Q9UIF9 | R.AGDRGEMPC AGDRGEMPOS[ 2      | -0.374 | 0.007    | -0.002    | 0 | 26.81 | 18 | 27  | 4  | 1905 | -1.14 |
| 1846.804 | 8  | Q9UIF9 | R.AGDRGEMPC AGDRGEMPOS[ 2      | -1.058 | 0.035    | -0.002    | 0 | 19.97 | 18 | 20  | 1  | 1905 | -1.14 |
| 1944.85  | 13 | Q9UIF9 | K.ASPVTSAAA ASPVT[181.014 2    | -0.786 | 0.021    | 0.002     | 0 | 22.67 | 18 | 44  | 4  | 1905 | 1.1   |
| 1630.584 | 9  | Q9UIG0 | K.DHTVSGDED DHTVS[166.99 2     | 2.159  | 1.10E-05 | 0.002     | 0 | 51.02 | 14 | 110 | 6  | 1483 | 1.01  |
| 1868.755 | 24 | Q9UIG0 | R.LAEDGEGDSE LAEDGEGDS[166 2   | 2.159  | 6.40E-07 | 0.003     | 0 | 67.2  | 18 | 110 | 6  | 1483 | 1.58  |
| 868.418  | 7  | Q9UIG0 | K.SLSGSPK.V SLS[166.9984]C 2   | -0.618 | 0.014    | -3.00E-04 | 0 | 26.37 | 20 | 110 | 6  | 1483 | -0.29 |
| 1814.763 | 18 | Q9UI14 | R.LPSSSEMGS LPS[166.9984]S 2   | 1.596  | 8.50E-05 | 0.002     | 0 | 46.51 | 18 | 47  | 1  | 662  | 1.15  |
| 1814.763 | 13 | Q9UI14 | R.LPSSSEMGS LPS[166.9984] 2    | 1.203  | 2.10E-04 | 0.002     | 0 | 42.58 | 18 | 43  | 1  | 662  | 1.15  |
| 1641.712 | 9  | Q9UI70 | R.SLGLSGLGDD SLGLSLS[166.9 2   | 0.438  | 0.001    | 0.002     | 0 | 35.91 | 19 | 36  | 2  | 344  | 1.42  |
| 2296.028 | 18 | Q9UIF2 | R.QQTQQVQSP QQTQQVQSPVT 3      | 0.948  | 0.004    | 0.003     | 0 | 29.8  | 18 | 48  | 3  | 1139 | 1.17  |
| 1496.569 | 13 | Q9UIF2 | K.SPSQDNTDSY S[166.9984]PXC 2  | 0.712  | 6.30E-04 | 0.002     | 0 | 34.67 | 15 | 48  | 3  | 1139 | 1.31  |
| 1496.569 | 7  | Q9UIF2 | K.SPSQDNTDSY SPS[166.9984]C 2  | -0.282 | 0.006    | 0.002     | 0 | 24.74 | 15 | 35  | 2  | 1139 | 1.31  |
| 2296.028 | 19 | Q9UIF2 | R.QQTQQVQSP QQTQQVQSPVT 3      | 0.596  | 0.009    | 0.003     | 0 | 26.29 | 18 | 35  | 2  | 1139 | 1.17  |
| 1822.637 | 7  | Q9UIK0 | R.GGASSCCCEE GGASSS[166.9 2    | -0.286 | 0.006    | 0.003     | 0 | 23.69 | 14 | 24  | 1  | 312  | 1.77  |
| 1471.65  | 6  | Q9UIJ6 | R.AMSTTSSISPA AMSTTSSIS[16 2   | 1.277  | 1.50E-04 | 0.002     | 0 | 43.32 | 18 | 43  | 1  | 430  | 1     |
| 937.475  | 5  | Q9UK58 | K.SPISINVK.T S[166.9984]PIS 2  | -0.861 | 0.02     | 7.00E-04  | 0 | 23.92 | 20 | 24  | 1  | 526  | 0.75  |
| 1705.743 | 22 | Q9UK76 | R.RNSSEASSGD RNS[166.99 3      | 1.291  | 6.20E-05 | 0.004     | 1 | 47.99 | 18 | 163 | 6  | 154  | 2.43  |
| 1705.743 | 16 | Q9UK76 | R.RNSSEASSGD RNS[166.99 3      | 1.291  | 2.90E-04 | 0.004     | 1 | 40.62 | 18 | 163 | 6  | 154  | 2.08  |
| 1657.718 | 8  | Q9UK76 | K.SSGREDLES S[166.9984]GI 3    | 0.628  | 0.008    | 0.001     | 1 | 25.62 | 17 | 117 | 6  | 154  | 0.72  |
| 1705.743 | 9  | Q9UK76 | R.RNSSEASSGD RNSSEASS[166. 2   | 0.092  | 0.002    | 6.00E-04  | 1 | 32.47 | 19 | 162 | 6  | 154  | 0.38  |
| 1549.642 | 9  | Q9UK76 | R.NNSEASSGDF NSS[166.9984] 2   | 2.274  | 1.50E-06 | 0.003     | 0 | 62.69 | 17 | 193 | 11 | 154  | 1.9   |
| 2060.878 | 7  | Q9UK76 | K.MASNIFGTPE MASNIFGT[181 2    | -0.109 | 0.004    | 0.002     | 0 | 28.44 | 17 | 190 | 10 | 154  | 1.22  |
| 1705.743 | 13 | Q9UK76 | R.RNSSEASSGD RNSSEASS[166. 3   | 1.256  | 0.001    | 0.004     | 1 | 35.02 | 18 | 155 | 10 | 154  | 2.08  |
| 1549.642 | 9  | Q9UK76 | R.NNSEASSGDF NS[166.9984]SI 2  | 1.944  | 1.10E-06 | 0.003     | 0 | 64.22 | 17 | 162 | 6  | 154  | 1.9   |
| 1727.789 | 6  | Q9UKA4 | R.SVSPFLNPSV SVS[166.9984]F 2  | 0.355  | 0.001    | 0.002     | 0 | 34.1  | 18 | 52  | 4  | 1901 | 1.07  |
| 1200.53  | 7  | Q9UKA4 | R.EDSGLFSPIR.I EDSGLFS[166. 2  | -1.019 | 0.032    | 0.002     | 0 | 20.34 | 18 | 24  | 6  | 1901 | 1.81  |
| 1352.577 | 9  | Q9UKA4 | K.SFSEDFVQSVI S[166.9984]FSE 2 | 0.485  | 9.50E-04 | 0.003     | 0 | 34.39 | 17 | 67  | 2  | 1901 | 2     |
| 1732.754 | 11 | Q9UKES | R.QNSDPTSENF QNS[166.9984] 2   | 0.562  | 8.00E-04 | 5.00E-04  | 0 | 36.17 | 18 | 45  | 5  | 1360 | 0.31  |
| 1427.657 | 14 | Q9UKES | K.SEGSPVLPHEI SEG[166.99       |        |          |           |   |       |    |     |    |      |       |

|          |    |        |                                  |        |          |           |     |       |    |     |    |      |       |
|----------|----|--------|----------------------------------|--------|----------|-----------|-----|-------|----|-----|----|------|-------|
| 1845.823 | 14 | Q9UKT5 | R.TTSREEVDEA TTS[166.9984]F 3    | 0.144  | 0.026    | 0.001     | 1   | 19.79 | 16 | 20  | 2  | 387  | 0.72  |
| 2197.877 | 10 | Q9UKV3 | K.LSEGSQPAEI LSEGS[166.998 2     | 2.159  | 6.50E-06 | 0.003     | 0   | 56.33 | 17 | 182 | 12 | 1341 | 1.26  |
| 2501.242 | 5  | Q9UKV3 | K.ASLVALPEQT ASLVALPEQT[1: 2     | -1.044 | 0.039    | 0.004     | 0   | 18.11 | 16 | 181 | 12 | 1341 | 1.16  |
| 1706.749 | 15 | Q9UKV3 | K.GVPAGNSDTI GVPAGNS[166. 2      | -0.31  | 0.006    | 0.003     | 1   | 27.45 | 18 | 182 | 12 | 1341 | 1.78  |
| 2501.242 | 9  | Q9UKV3 | K.ASLVALPEQT ASLVALPEQTAS 2      | -0.617 | 0.014    | 0.004     | 0   | 22.38 | 16 | 182 | 12 | 1341 | 1.64  |
| 1578.654 | 23 | Q9UKV3 | K.GVPAGNSDTI GVPAGNS[166. 2      | 2.159  | 9.20E-07 | 0.002     | 0   | 66.11 | 18 | 182 | 12 | 1341 | 1.07  |
| 1270.52  | 6  | Q9UKV3 | K.TTSPLEEEER.I TTS[166.9984]F 2  | 0.7    | 5.70E-04 | 0.002     | 0   | 36.54 | 17 | 209 | 12 | 1341 | 1.15  |
| 2197.877 | 13 | Q9UKV3 | K.LSEGSQPAEI LS[166.9984]EC 2    | 2.127  | 2.20E-06 | 0.002     | 0   | 60.9  | 17 | 209 | 12 | 1341 | 0.81  |
| 882.408  | 6  | Q9UKV3 | K.SLSPGVSR.D SLS[166.9984]P 2    | -0.735 | 0.015    | 7.00E-04  | 0   | 26.19 | 21 | 209 | 10 | 1341 | 0.84  |
| 1032.487 | 7  | Q9UKV3 | R.TAQVPSPPR.( TACVPS[166.99 2    | -0.093 | 0.004    | 0.002     | 0   | 30.62 | 19 | 181 | 12 | 1341 | 1.86  |
| 976.486  | 7  | Q9UKV5 | R.VPLDLSR.L VPLDLS[166.99: 2     | 1.444  | 1.20E-04 | 9.00E-04  | 0   | 44.99 | 18 | 45  | 3  | 643  | 0.91  |
| 3352.492 | 19 | Q9UKV5 | R.SDSIRPALNSF SDSIRPALNSPV 3     | 0.326  | 0.014    | 0.001     | 0   | 23.62 | 18 | 24  | 2  | 643  | 0.28  |
| 1336.557 | 6  | Q9UKV8 | R.SASFNTDPYV SAS[166.9984]I 2    | -0.882 | 0.016    | 0.002     | 0   | 23.76 | 18 | 24  | 1  | 859  | 1.19  |
| 1602.741 | 9  | Q9UKX7 | K.VAAEQTQSPSL VAAEQTQSPS[166.: 2 | 1.628  | 7.00E-05 | 0.002     | 0   | 47.83 | 19 | 56  | 2  | 468  | 1.13  |
| 1602.741 | 17 | Q9UKX7 | K.VAAEQTQSPSL VAAEQTQSPS[16 2    | 0.838  | 4.30E-04 | 0.002     | 0   | 39.93 | 19 | 40  | 2  | 468  | 1.13  |
| 2542.095 | 17 | Q9UKX7 | K.YLANIEQQHG YLANIEQQHGN 3       | 0.663  | 0.007    | 8.00E-04  | 1   | 26.95 | 18 | 56  | 2  | 468  | 0.3   |
| 1654.648 | 10 | Q9UKY1 | K.EEAGETSPAD EEAGETS[166.5 2     | -0.769 | 0.02     | 0.003     | 0   | 21.86 | 17 | 22  | 1  | 873  | 1.54  |
| 1200.533 | 6  | Q9UKY7 | R.VQAMQISSE VQAMQISS[166 2       | -0.456 | 0.01     | 0.001     | 0   | 23.99 | 16 | 24  | 1  | 258  | 0.84  |
| 2059.853 | 9  | Q9UKY7 | R.VQAMQISSE VQAMQISS[166 2       | 0.641  | 7.60E-04 | 0.002     | 1   | 37.96 | 19 | 47  | 2  | 258  | 0.81  |
| 2107.943 | 18 | Q9ULF5 | R.LNETELTDLEC LNETELTDLEGC 2     | 2.159  | 7.30E-07 | 0.002     | 0   | 66.64 | 18 | 67  | 1  | 831  | 0.92  |
| 2255.944 | 11 | Q9ULH0 | K.LPSDEDESGTI LPS[166.9984]C 2   | 0.776  | 5.30E-04 | 0.001     | 0   | 37.31 | 17 | 52  | 5  | 1771 | 1.51  |
| 1049.437 | 5  | Q9ULH0 | R.QMSFDLTK.L QMS[166.9984 2      | -0.38  | 0.007    | 0.001     | 0   | 25.74 | 17 | 45  | 2  | 1771 | 1.23  |
| 2255.944 | 21 | Q9ULH0 | K.LPSDEDESGTI LPSDEDES[166. 2    | -0.633 | 0.014    | 0.001     | 0   | 23.21 | 17 | 31  | 5  | 1771 | 0.51  |
| 2267.944 | 9  | Q9ULH1 | R.QEIDEDEDD QEIDEDES[166.9 3     | 0.776  | 0.005    | 0.003     | 0   | 29.08 | 19 | 29  | 3  | 1129 | 1.25  |
| 1693.768 | 9  | Q9ULJ3 | K.TEPSPLSDPS TEPS[166.998: 2     | -0.661 | 0.013    | 0.003     | 0   | 23.94 | 18 | 54  | 4  | 1066 | 1.7   |
| 2401.117 | 9  | Q9ULJ3 | K.IQPLEPDSPTGI IQPLEPDS[166.: 3  | 0.272  | 0.019    | 0.004     | 0   | 23.06 | 18 | 54  | 4  | 1066 | 1.87  |
| 2401.117 | 7  | Q9ULJ3 | K.IQPLEPDSPTGI IQPLEPDSPT[18 3   | -0.037 | 0.038    | 0.004     | 0   | 19.95 | 18 | 55  | 3  | 1066 | 1.87  |
| 1040.492 | 7  | Q9ULJ5 | K.TSSFHLLR.R TSS[166.9984]F 2    | -0.476 | 0.009    | 0.001     | 0   | 26.79 | 19 | 27  | 1  | 1215 | 1.29  |
| 915.397  | 6  | Q9ULM3 | K.FLESPSR.S FLES[166.9984] 2     | -0.921 | 0.025    | 9.00E-04  | 0   | 23.34 | 20 | 23  | 2  | 1422 | 1.04  |
| 1204.554 | 4  | Q9ULM3 | K.GGHMIAVSPG GHMIAVSP[16: 2      | -1.051 | 0.031    | 0.002     | 0   | 18.03 | 16 | 18  | 1  | 1422 | 1.4   |
| 915.397  | 4  | Q9ULM3 | K.FLESPSR.S FLESPS[166.99: 2     | -1.132 | 0.041    | 9.00E-04  | 0   | 21.22 | 20 | 21  | 1  | 1422 | 1.04  |
| 1995.848 | 17 | Q9ULM3 | R.RGSPSAAFFT RGS[166.9984] 3     | 0.118  | 0.027    | 0.002     | 1   | 21.53 | 18 | 22  | 2  | 858  | 0.94  |
| 2327.976 | 14 | Q9ULM8 | K.VSTLAGPSSDI VSTLAGPSS[16: 2    | 2.03   | 3.00E-05 | 0.002     | 0   | 50.83 | 18 | 58  | 2  | 2610 | 0.98  |
| 2327.976 | 9  | Q9ULM8 | K.VSTLAGPSSDI VSTLAGPSS[166. 2   | 2.134  | 2.40E-05 | 0.002     | 0   | 51.89 | 18 | 79  | 3  | 2610 | 0.98  |
| 2327.976 | 7  | Q9ULM8 | K.VSTLAGPSSDI VSTLAGPSSDD: 3     | 0.227  | 0.021    | 0.002     | 0   | 22.6  | 18 | 60  | 2  | 2610 | 0.64  |
| 1154.539 | 6  | Q9ULU4 | R.RISLSDMPR.S RIS[166.9984]L 2   | 0.023  | 0.003    | 6.00E-04  | 1   | 28.78 | 16 | 42  | 6  | 1186 | 0.49  |
| 1203.511 | 6  | Q9ULU4 | K.LNFDMTASPI LNFDMTAS[16: 2      | -0.222 | 0.005    | 0.001     | 0   | 26.33 | 16 | 42  | 6  | 1186 | 1.14  |
| 2285.923 | 16 | Q9ULU4 | R.SPMSTNSSV SPMSSTNSSVHTI 3      | 0.033  | 0.033    | -0.002    | 0   | 20.65 | 18 | 42  | 6  | 1186 | -0.73 |
| 1198.479 | 10 | Q9ULV4 | K.NDQCYYDDIR.' NDQC[160.030 2    | -0.603 | 0.012    | 0.001     | 0   | 24.51 | 18 | 25  | 1  | 474  | 0.9   |
| 1434.688 | 6  | Q9ULW0 | K.SSDQPLTPV: SSDQPLTPVPS[ 2      | 1.797  | 4.60E-05 | 0.002     | 0   | 49.52 | 19 | 50  | 2  | 747  | 1.39  |
| 2304.83  | 12 | Q9ULX3 | R.GEDVPEEEE GEDVPS[166.9: 2      | 2.159  | 7.80E-09 | 0.001     | 0   | 82.82 | 14 | 83  | 3  | 412  | 0.59  |
| 1999.828 | 7  | Q9ULX3 | R.KDSDDDGGG KDS[166.9984 3       | 0.309  | 0.014    | 0.003     | 1   | 24.43 | 19 | 85  | 2  | 412  | 1.46  |
| 1871.733 | 5  | Q9ULX3 | K.DSDSDDDGGG DSD[166.9984 2      | -0.84  | 0.02     | 0.004     | 0   | 21.13 | 17 | 78  | 4  | 412  | 2.23  |
| 2301.003 | 16 | Q9UM11 | K.RSSPDGNDI RSS[166.9984]F 3     | 0.492  | 0.009    | -0.001    | 1   | 27.24 | 20 | 27  | 1  | 496  | -0.51 |
| 2498.156 | 8  | Q9UMN6 | R.GVLDLDRPGE GVLDLDRPGE: 3       | 0.238  | 0.016    | 0.002     | 0   | 24.72 | 19 | 25  | 2  | 2715 | 1.22  |
| 1728.818 | 20 | Q9UMN6 | K.RERPSPESP RERPSPESP[16: 3      | 0.953  | 0.004    | 0.002     | 1   | 30.88 | 19 | 66  | 3  | 2715 | 0.98  |
| 2096.87  | 8  | Q9UMZ2 | K.SGSLDSDFSOI SGSLDSD[166.9 2    | 0.668  | 6.90E-04 | 0.001     | 0   | 36.23 | 17 | 140 | 4  | 1314 | 0.67  |
| 1624.783 | 13 | Q9UMZ2 | R.QLSLEGGSLG QLS[166.9984]I 2    | 2.159  | 9.60E-06 | 0.003     | 0   | 57.12 | 19 | 140 | 4  | 1314 | 1.58  |
| 1898.809 | 8  | Q9UMZ2 | K.ETSFGSSENI ETSFGS[166.99 2     | 2.119  | 1.80E-05 | 0.002     | 0   | 52.64 | 18 | 53  | 1  | 1314 | 0.85  |
| 1794.852 | 10 | Q9UMZ2 | K.EEASPVLTSA EAS[166.9984 2      | -0.914 | 0.024    | 0.001     | 0   | 20.41 | 17 | 140 | 4  | 1314 | 0.62  |
| 1898.809 | 7  | Q9UMZ2 | K.ETSFGSSENI ETSFGS[166.9 2      | 0.542  | 8.30E-04 | 0.002     | 0   | 35.97 | 18 | 36  | 2  | 1314 | 0.85  |
| 2096.87  | 8  | Q9UMZ2 | K.SGSLDSDFSOI S[166.9984]GSI 2   | 0.52   | 9.80E-04 | 0.001     | 0   | 34.73 | 17 | 106 | 4  | 1314 | 0.67  |
| 1225.571 | 6  | Q9UN79 | K.DJSLDSSPAK DJSLDSD[166.9 2     | -0.154 | 0.004    | 0.002     | 0   | 29.01 | 18 | 29  | 2  | 622  | 1.76  |
| 1225.571 | 5  | Q9UN79 | K.DJSLDSSPAK DJSLDSD[166.99 2    | -0.998 | 0.029    | 0.002     | 0   | 20.57 | 18 | 21  | 2  | 622  | 1.76  |
| 1951.941 | 10 | Q9UN86 | K.STTTPPAEPYV STT[181.014]PF 2   | 2.159  | 1.10E-05 | 0.001     | 0   | 54.71 | 17 | 55  | 1  | 482  | 0.65  |
| 1872.814 | 10 | Q9UNE7 | R.LGAGGGSPEH LGAGGGS[166. 3      | -0.153 | 0.049    | 0.001     | 1   | 19.79 | 19 | 20  | 2  | 303  | 0.49  |
| 1872.814 | 12 | Q9UNE7 | R.LGAGGGSPEH LGAGGGS[166. 2      | -1.047 | 0.037    | 9.00E-04  | 1   | 21.08 | 19 | 21  | 3  | 303  | 0.49  |
| 2270.879 | 18 | Q9UNF1 | K.HLDGEDGSS HLDGEDGSS[1 3        | 1.256  | 3.30E-05 | 0.002     | 0   | 48.09 | 16 | 48  | 1  | 606  | 0.77  |
| 1787.785 | 9  | Q9UNL2 | K.QQSEEDLLQ QQS[166.9984] 2      | 0.723  | 6.10E-04 | 5.00E-04  | 0   | 37.76 | 18 | 38  | 1  | 185  | 0.26  |
| 1115.477 | 8  | Q9UNN5 | R.TPSGFEFLER R TPS[166.9984]C 2  | 0.631  | 8.20E-04 | 0.001     | 0   | 35.86 | 17 | 36  | 1  | 650  | 1.2   |
| 1871.718 | 10 | Q9UN51 | R.QLLDSEEQE QLLDS[166.998 2      | 2.159  | 8.10E-06 | 0.002     | 0   | 55.38 | 17 | 70  | 2  | 1208 | 1.17  |
| 1452.625 | 12 | Q9UN51 | K.AGLASPEEED AGLAS[166.99: 2     | 0.07   | 0.002    | 0.002     | 0   | 32.25 | 19 | 70  | 2  | 1208 | 1.06  |
| 2816.142 | 15 | Q9UNX4 | K.GSSPGIQTDL GSSPGIQT[18 3       | 0.503  | 0.009    | 0.006     | 0   | 27.37 | 20 | 27  | 2  | 943  | 2.24  |
| 2816.142 | 20 | Q9UNX4 | K.GSSPGIQTDL GS[166.9984]SI 3    | -0.034 | 0.032    | 0.006     | 0   | 22    | 20 | 22  | 1  | 943  | 2.24  |
| 2816.142 | 32 | Q9UNX4 | K.GSSPGIQTDL GS[166.9984]I 3     | 1.094  | 0.002    | 0.006     | 0   | 33.27 | 20 | 33  | 1  | 943  | 2.24  |
| 2085.848 | 15 | Q9UNZ2 | R.DIHQDQDEE DIHQDQDEEEI 3        | 1.291  | 3.00E-04 | 0.003     | 0   | 40.06 | 17 | 40  | 2  | 370  | 1.28  |
| 2036.822 | 10 | Q9UP95 | R.LESLYDEEDE LESLY[166.99: 2     | 2.159  | 2.40E-06 | 0.002     | 0   | 61.74 | 18 | 62  | 1  | 1085 | 0.91  |
| 1426.661 | 8  | Q9UPN3 | K.AFLAELEQNSI AFLAELEQNS[1 2     | 0.459  | 0.001    | 0.003     | 0   | 37.14 | 20 | 69  | 10 | 7388 | 2.14  |
| 1413.605 | 7  | Q9UPN3 | R.QGFSFSDVSI QGS[166.9984 3      | 0.234  | 0.002    | 0.002     | 0   | 32.89 | 18 | 69  | 10 | 7388 | 1.28  |
| 1569.706 | 6  | Q9UPN3 | K.RQGSFSDVSI RQGS[166.998: 3     | 0.387  | 0.015    | 0.001     | 1   | 24.21 | 18 | 70  | 10 | 7388 | 0.83  |
| 1134.421 | 9  | Q9UPN3 | K.SMDAMSPT SMDAMSPT[1 2          | 0.324  | 0.002    | 0.001     | 0   | 28.79 | 13 | 63  | 9  | 7388 | 0.91  |
| 1624.747 | 5  | Q9UPN6 | K.ETVQTTQSP ETVQTTQSP[1 2        | 0.329  | 0.002    | -3.00E-04 | 0   | 32.84 | 17 | 33  | 2  | 1271 | -0.17 |
| 1624.747 | 8  | Q9UPN6 | K.ETVQTTQSP ETVQTTQSP[166 2      | 1.089  | 2.90E-04 | -3.00E-04 | 0   | 40.43 | 17 | 40  | 1  | 1271 | -0.17 |
| 1911.577 | 6  | Q9UPQ0 | R.QTPSPDVLR QTPS[166.9984 2      | -0.544 | 0.01     | 0.001     | 0   | 26.11 | 19 | 34  | 3  | 1083 | 1.07  |
| 1838.73  | 20 | Q9UPQ0 | R.GSSDGRGSD: GSSDGRGS[16: 3      | 0.271  | 0.018    | 0.001     | 1   | 22.06 | 17 | 25  | 3  | 1083 | 0.61  |
| 1838.73  | 9  | Q9UPQ0 | R.GSSDGRGSD: GS[166.9984]SI 3    | -0.152 | 0.049    | 0.001     | 1   | 17.84 | 17 | 31  | 3  | 1083 | 0.61  |
| 1838.73  | 16 | Q9UPQ0 | R.GSSDGRGSD: GSS[166.9984]I 3    | 0.639  | 0.008    | 0.001     | 1   | 25.71 | 17 | 34  | 3  | 1083 | 0.61  |
| 1661.709 | 9  | Q9UPQ0 | R.ASVLDTMSA ASVLDTMSAG 2         | -0.489 | 0.011    | 0.002     | 0   | 25.64 | 18 | 42  | 4  | 1083 | 0.96  |
| 2009.812 | 9  | Q9UPQ9 | K.DPEEFGWEEF DEEFGWEEPS 2        | 0.024  | 0.003    | 0.003     | 0   | 30.79 | 18 | 31  | 1  | 1833 | 1.65  |
| 1957.802 | 13 | Q9UP56 | R.LRPSTVDEEI LRPST[166.99: 2     | -0.463 | 0.009    | 0.002     | 0   | 26.9  | 19 | 27  | 2  | 1923 | 1.22  |
| 1957.802 | 7  | Q9UP56 | R.LRPSTVDEEI LRPST[181.014 2     | 0.673  | 6.70E-04 | 0.002     | 0   | 38.29 | 19 | 38  | 3  | 1923 | 1.22  |
| 1465.551 | 9  | Q9UP78 | K.TGSGSPFAGN TGSGS[166.99: 2     | -0.915 | 0.027    | 0.003     | 0   | 18.43 | 15 | 18  | 3  | 1303 | 2.01  |
| 2381.008 | 15 | Q9UPU5 | R.GGSTGGGGG GGS[166.9984 3       | 0.401  | 0.014    | 0.002     | 0   | 24.36 | 18 | 24  | 3  | 2620 | 0.84  |
| 2381.008 | 9  | Q9UPU5 | R.GGSTGGGGG GGS[181.014] 3       | 0.508  | 0.011    | 0.002     | 0   | 25.45 | 18 | 25  | 1  | 2620 | 0.84  |
| 1747.717 | 8  | Q9UPW0 | K.VTLYNTDQDK VTLYNTDQDGS 2       | 0.072  | 0.002    | -1.00E-04 | 0   | 31.3  | 18 | 31  | 1  | 622  | -0.04 |
| 808.396  | 5  | Q9UPY5 | R.LPSLGNK.E LPS[166.9984]I 2     | -0.543 | 0.01     | 3.00E-04  | 0   | 26.12 | 19 | 26  | 1  | 501  | 0.35  |
| 1981.886 | 6  | Q9UQ35 | R.SGSSQELDVK SGSS[166.9984 2     | 0.16   | 0.002    | 7.00E-04  | 0</ |       |    |     |    |      |       |



|          |    |              |                                  |        |          |           |   |       |    |     |    |      |       |
|----------|----|--------------|----------------------------------|--------|----------|-----------|---|-------|----|-----|----|------|-------|
| 3012.35  | 17 | Q9UQ35       | R.HGSSPQPLAT1 HGSSPQPLATT 3      | 0.953  | 0.004    | 0.002     | 0 | 30.85 | 19 | 581 | 65 | 2752 | 0.84  |
| 1306.604 | 5  | Q9UQ35       | K.AQTPPPGLSIA AQT[181.014]P 2    | -0.758 | 0.016    | 0.002     | 0 | 23.97 | 19 | 516 | 62 | 2752 | 1.25  |
| 1301.519 | 7  | Q9UQ35       | R.SVSPCNVESI SVS[166.9984]F 2    | 0.37   | 0.001    | 0.001     | 0 | 34.25 | 18 | 581 | 65 | 2752 | 1.04  |
| 2087.879 | 7  | Q9UQ35       | R.QGSTITSQAN QGSITS[166.99 2     | 0.636  | 6.80E-04 | 0.001     | 0 | 36.91 | 18 | 581 | 65 | 2752 | 0.65  |
| 2715.178 | 12 | Q9UQ35       | R.GEGDAPFSEF GEGDAPFSEPG 3       | 1.179  | 0.002    | 0.004     | 0 | 33.11 | 19 | 581 | 65 | 2752 | 1.46  |
| 2061.853 | 8  | Q9UQ35       | R.SGSSQELDVK SCS[166.9984] 2     | -0.711 | 0.017    | 4.00E-04  | 0 | 23.44 | 18 | 516 | 62 | 2752 | 0.22  |
| 1826.795 | 21 | Q9UQ35       | K.THTTALAGRS THTTALAGRS[1 2      | 0.497  | 0.001    | 0.001     | 1 | 35.52 | 18 | 516 | 62 | 2752 | 0.77  |
| 1475.576 | 14 | Q9UQ35       | R.SCFESSDPDEL SC[160.0307]FF 2   | 1.13   | 2.60E-04 | 0.003     | 0 | 38.83 | 15 | 656 | 61 | 2752 | 1.84  |
| 1109.514 | 10 | Q9UQ35       | R.SRTSPAPWK SRTS[166.9984 2      | -0.792 | 0.021    | 8.00E-04  | 1 | 21.63 | 17 | 581 | 65 | 2752 | 0.71  |
| 1117.493 | 6  | Q9UQ35       | R.SLSYSPVER R SLS[166.9984]Y 2   | -0.154 | 0.005    | 0.001     | 0 | 30.01 | 19 | 549 | 60 | 2752 | 1.07  |
| 3092.316 | 15 | Q9UQ35       | R.HGSSPQPLAT1 HGSSPQPLATT 3      | -0.152 | 0.049    | 0.002     | 0 | 19.83 | 19 | 549 | 60 | 2752 | 0.58  |
| 1293.512 | 7  | Q9UQ35       | R.SSSPVTELASR SS[166.9984]S 2    | -1.002 | 0.034    | 0.001     | 0 | 17.53 | 15 | 549 | 60 | 2752 | 0.75  |
| 2007.913 | 6  | Q9UQ35       | R.QGSTITSQAN QGSITS[166.99 2     | -0.687 | 0.016    | 0.002     | 0 | 23.68 | 18 | 475 | 53 | 2752 | 0.78  |
| 2243.98  | 8  | Q9UQ35       | R.QGSTITSQAN QGSITS[166.99 3     | 0.988  | 0.003    | 0.003     | 1 | 30.23 | 18 | 549 | 60 | 2752 | 1.36  |
| 2243.98  | 5  | Q9UQ35       | R.QGSTITSQAN QGSITS[166.99 3     | -0.091 | 0.039    | 0.003     | 1 | 19.45 | 18 | 491 | 67 | 2752 | 1.36  |
| 2871.279 | 21 | Q9UQ35       | R.RGEGDAPFSEF GEGDAPFSEPG 4      | -0.244 | 0.02     | 0.002     | 1 | 22.98 | 18 | 491 | 67 | 2752 | 0.68  |
| 2715.178 | 12 | Q9UQ35       | R.GEGDAPFSEF GEGDAPFSEPG 3       | -0.137 | 0.044    | 0.004     | 0 | 19.99 | 19 | 507 | 66 | 2752 | 1.46  |
| 1350.616 | 12 | Q9UQ35       | R.SRTPPSPAPSQ SRTPPS[166.99 3    | 0.352  | 0.015    | 0.002     | 1 | 23.87 | 18 | 522 | 62 | 2752 | 1.08  |
| 2871.279 | 11 | Q9UQ35       | R.RGEGDAPFSEF GEGDAPFSEPG 4      | -0.169 | 0.049    | 0.002     | 1 | 18.97 | 18 | 507 | 66 | 2752 | 0.68  |
| 1696.706 | 14 | Q9UQ35       | R.SSGHSSSELSP SSGHSSSELS[16 2    | 2.197  | 1.90E-05 | -0.001    | 0 | 52.95 | 18 | 515 | 66 | 2752 | -0.73 |
| 2084.755 | 11 | Q9UQ35       | R.DGSGTSPSRHS DGSST[181.01 2     | -1.039 | 0.035    | 0.002     | 1 | 18.14 | 16 | 515 | 66 | 2752 | 0.75  |
| 2061.853 | 15 | Q9UQ35       | R.SGSSQELDVK SCS[166.9984 2      | -0.37  | 0.008    | 4.00E-04  | 0 | 26.83 | 18 | 515 | 66 | 2752 | 0.22  |
| 979.508  | 5  | Q9UQ35       | R.SRSPLAIR R SRS[166.9984]F 2    | -0.954 | 0.026    | 8.00E-04  | 1 | 20.99 | 18 | 604 | 65 | 2752 | 0.8   |
| 1350.616 | 5  | Q9UQ35       | R.SRTPPSPAPSQ SRT[181.014]PI 2   | -1.144 | 0.042    | 0.002     | 1 | 19.09 | 18 | 604 | 65 | 2752 | 1.82  |
| 1776.672 | 14 | Q9UQ35       | R.SSGHSSSELSP SS[166.9984]GI 2   | 2.025  | 1.60E-05 | 0.001     | 0 | 51.88 | 16 | 604 | 65 | 2752 | 0.75  |
| 1350.616 | 11 | Q9UQ35       | R.SRTPPSPAPSQ S[166.9984]RTI 3   | 0.135  | 0.025    | 0.002     | 1 | 21.99 | 18 | 475 | 53 | 2752 | 1.08  |
| 1746.782 | 7  | Q9UQ35       | R.SSSPVTELASR SSS[166.9984]F 2   | -1.091 | 0.037    | 0.002     | 1 | 20.63 | 19 | 522 | 62 | 2752 | 1.15  |
| 2871.279 | 17 | Q9UQ35       | R.RGEGDAPFSEF GEGDAPFSEPG 3      | 0.795  | 0.005    | -4.00E-04 | 1 | 28.3  | 18 | 522 | 62 | 2752 | -0.16 |
| 1301.519 | 8  | Q9UQ35       | R.SVSPCNVESI S[166.9984]VSF 2    | 0.092  | 0.002    | 0.001     | 0 | 31.46 | 18 | 522 | 62 | 2752 | 1.04  |
| 1696.706 | 15 | Q9UQ35       | R.SSGHSSSELSP SS[166.9984]GI 2   | -0.016 | 0.003    | 0.003     | 0 | 30.37 | 18 | 481 | 65 | 2752 | 1.63  |
| 1099.449 | 7  | Q9UQ35       | R.SLSGSSPCPKI SLS[166.9984]C 2   | 1.38   | 1.30E-04 | 0.002     | 0 | 42.34 | 16 | 491 | 67 | 2752 | 1.42  |
| 1981.886 | 9  | Q9UQ35       | R.SGSSQELDVK SCS[166.9984] 3     | -0.043 | 0.033    | 0.002     | 0 | 20.91 | 19 | 656 | 61 | 2752 | 1.15  |
| 1626.713 | 5  | Q9UQ35       | R.CRSPGMLER C[160.0307]RS 3      | 0.473  | 0.012    | 0.002     | 1 | 25.09 | 18 | 507 | 66 | 2752 | 1.01  |
| 1776.672 | 6  | Q9UQ35       | R.SSGHSSSELSP SSGHSSSELS[166.9 3 | 0.228  | 0.02     | 0.002     | 0 | 21.64 | 17 | 507 | 66 | 2752 | 1.09  |
| 2715.178 | 13 | Q9UQ35       | R.GEGDAPFSEF GEGDAPFSEPG 3       | 1.177  | 0.002    | 0.004     | 0 | 33.14 | 19 | 481 | 65 | 2752 | 1.46  |
| 1837.757 | 24 | Q9UQ80       | K.TAENATSGET TAENATSGETLI 2      | -0.226 | 0.005    | 0.003     | 0 | 29.27 | 19 | 29  | 1  | 394  | 1.76  |
| 2339.055 | 8  | Q9UQ88,P2112 | R.GTSPRPPEG GTS[166.9984] 3      | 0.662  | 0.007    | 0.003     | 0 | 26.97 | 18 | 27  | 27 | 1.45 |       |
| 1283.563 | 4  | Q9UQ88,P2112 | K.RDLSLEGELR RDS[166.9984] 2     | 0.121  | 0.002    | 0.002     | 1 | 32.79 | 19 | 55  | 55 | 1.17 |       |
| 2339.055 | 21 | Q9UQ88,P2112 | R.GTSPRPPEG GT[181.014]SPI 3     | 1.256  | 7.10E-04 | 0.003     | 0 | 37.12 | 18 | 39  | 39 | 1.45 |       |
| 2495.156 | 6  | Q9UQ88,P2112 | K.RGTSPRPPEG RGTS[166.9984 4     | -0.025 | 0.035    | 0.003     | 1 | 20.32 | 18 | 39  | 39 | 1.16 |       |
| 1101.482 | 7  | Q9UQ88       | K.SSSTGNLLDK SSS[166.9984]T 2    | 1.284  | 1.80E-04 | 0.001     | 0 | 42.39 | 17 | 60  | 4  | 552  | 1.05  |
| 1138.514 | 12 | Q9UQ88       | K.SLSPPPQSQSK SLS[166.9984]P 2   | -0.715 | 0.016    | 0.002     | 0 | 22.4  | 17 | 40  | 3  | 552  | 1.34  |
| 2246.868 | 13 | Q9UQ88       | K.KGDVEGQSQC KGDVEGQSQC[16 2     | 2.119  | 4.20E-06 | 0.003     | 1 | 57.84 | 17 | 117 | 4  | 1217 | 1.21  |
| 2166.902 | 17 | Q9UQ88       | K.KGDVEGQSQC KGDVEGQSQC[16 2     | 1.291  | 7.60E-05 | 0.004     | 1 | 46.75 | 18 | 136 | 4  | 1217 | 1.82  |
| 2246.868 | 15 | Q9UQ88       | K.KGDVEGQSQC KGDVEGQSQC[166. 3   | 1.921  | 5.80E-05 | 0.003     | 1 | 46.76 | 17 | 136 | 4  | 1217 | 1.52  |
| 1242.525 | 6  | Q9UQ88       | K.ATISDEEIER C ATIS[166.9984] 2  | 1.697  | 6.80E-05 | 9.00E-04  | 0 | 46.52 | 17 | 47  | 1  | 213  | 0.71  |
| 1608.625 | 9  | Q9UQ88       | R.AGMTSSPDA AGMTSS[166.9 2       | -0.962 | 0.026    | 0.002     | 0 | 19.93 | 17 | 38  | 2  | 794  | 1.38  |
| 1791.768 | 11 | Q9UQ88       | K.GGLTSEEDS GLLTSEEDS[166.9 2    | 0.466  | 0.001    | 0.002     | 0 | 35.21 | 18 | 38  | 2  | 794  | 1.38  |
| 1474.61  | 9  | Q9Y232       | R.TAVDGFQSES TAVDGFQSES[1 2      | 1.579  | 8.50E-05 | 0.003     | 0 | 45.34 | 17 | 45  | 2  | 598  | 1.81  |
| 1687.721 | 10 | Q9Y248       | R.TNLQPLESTQ TNLQPLESTQS[ 2      | -1.07  | 0.037    | 0.001     | 0 | 18.85 | 17 | 19  | 1  | 185  | 0.78  |
| 3924.709 | 18 | Q9Y261       | K.AAAGAQAQSQ AAAGAQAQSQA 4       | 1.276  | 0.002    | 0.003     | 0 | 33.33 | 18 | 40  | 2  | 457  | 0.74  |
| 3924.709 | 37 | Q9Y261       | K.AAAGAQAQSQ AAAGAQAQSQA 4       | 1.629  | 7.40E-04 | 0.003     | 0 | 36.77 | 18 | 37  | 2  | 457  | 0.74  |
| 4004.675 | 20 | Q9Y261       | K.AAAGAQAQSQ AAAGAQAQSQA 4       | 0.435  | 0.012    | 0.002     | 0 | 23.92 | 17 | 40  | 2  | 457  | 0.52  |
| 4004.675 | 23 | Q9Y261       | K.AAAGAQAQSQ AAAGAQAQSQA 4       | 0.626  | 0.007    | 0.002     | 0 | 25.87 | 17 | 46  | 2  | 457  | 0.52  |
| 3924.709 | 30 | Q9Y261       | K.AAAGAQAQSQ AAAGAQAQSQA 4       | 1.701  | 6.10E-04 | 0.003     | 0 | 37.62 | 18 | 46  | 2  | 457  | 0.74  |
| 3924.709 | 18 | Q9Y261       | K.AAAGAQAQSQ AAAGAQAQSQA 4       | 0.117  | 8.10E-04 | 0.003     | 0 | 36.36 | 18 | 48  | 2  | 457  | 0.74  |
| 2430.93  | 10 | Q9Y266       | K.NGLSDSPGKC NGLSDS[166.95 3     | 1.291  | 1.80E-05 | 0.002     | 1 | 50.69 | 16 | 51  | 1  | 331  | 0.7   |
| 2356.027 | 20 | Q9Y2D5       | R.QAPPHIELSN QAPPHIELSNS 3       | 0.339  | 0.014    | 0.004     | 0 | 23.73 | 18 | 156 | 8  | 859  | 1.5   |
| 2083.954 | 22 | Q9Y2D5       | R.DALGDSLQV DALGDSLQV[166.9 2    | 1.903  | 3.60E-05 | 0.002     | 0 | 50.56 | 19 | 214 | 8  | 859  | 0.8   |
| 2095.929 | 12 | Q9Y2D5       | K.SPGALETPSA S[166.9984]PG 2     | 2.119  | 2.70E-06 | 0.002     | 0 | 62.23 | 19 | 156 | 8  | 859  | 0.92  |
| 1223.578 | 6  | Q9Y2D5       | R.QVLQSTQSPR QVLQSTQS[166 2      | -0.197 | 0.005    | 0.002     | 0 | 29.58 | 19 | 140 | 8  | 859  | 1.4   |
| 1300.585 | 7  | Q9Y2D5       | R.TLSMIEEIER J TLS[166.9984]H 2  | 1.749  | 5.00E-05 | 0.002     | 0 | 46.04 | 16 | 140 | 8  | 859  | 1.77  |
| 2356.027 | 19 | Q9Y2D5       | R.QAPPHIELSN QAPPHIELSNS[ 3      | 0.396  | 0.012    | 0.004     | 0 | 24.31 | 18 | 175 | 8  | 859  | 1.5   |
| 1417.634 | 6  | Q9Y2D5       | K.DDDHGILDOF DDDHGILDOFSI 3      | 0.393  | 0.013    | 0.003     | 0 | 25.27 | 19 | 145 | 8  | 859  | 1.93  |
| 1112.498 | 6  | Q9Y2F5       | K.SISPEVASR F SIS[166.9984]P 2   | -1.15  | 0.049    | 4.00E-04  | 0 | 20.05 | 19 | 20  | 5  | 2266 | 0.34  |
| 1157.491 | 9  | Q9Y2F5       | K.SELCSSPLGK J SELC[160.0307 2   | -1.141 | 0.048    | 6.00E-04  | 0 | 18.14 | 17 | 20  | 5  | 2266 | 0.52  |
| 1281.536 | 6  | Q9Y2F5       | R.LDTGSPPETI LDTGS[166.998 2     | -0.252 | 0.006    | 0.002     | 0 | 27.02 | 17 | 89  | 5  | 2266 | 1.14  |
| 4486.969 | 15 | Q9Y2F5       | R.ETTGSSSHASI ETTGSSSHASEP 4     | 0.117  | 4.80E-06 | 0.004     | 0 | 57.12 | 16 | 89  | 5  | 2266 | 0.95  |
| 1625.627 | 7  | Q9Y2G3       | R.SWSASDPFY SWS[166.9984] 2      | 1.336  | 1.50E-04 | 0.002     | 0 | 39.89 | 14 | 40  | 2  | 1177 | 1.49  |
| 2389.055 | 19 | Q9Y2H0       | R.QNSATESADS QNS[166.9984] 3     | 0.274  | 0.019    | 0.003     | 0 | 24.06 | 19 | 83  | 4  | 992  | 1.4   |
| 1481.667 | 7  | Q9Y2H0       | K.ANSWQLVETI ANSWQLVETI[1 2      | 2.159  | 5.60E-06 | 0.003     | 0 | 58.2  | 18 | 83  | 4  | 992  | 1.91  |
| 2389.055 | 13 | Q9Y2H0       | R.QNSATESADS QNSATESADS[1 3      | 0.019  | 0.034    | 0.003     | 0 | 21.53 | 19 | 919 | 4  | 992  | 1.4   |
| 2389.055 | 19 | Q9Y2H0       | R.QNSATESADS QNSAT[181.01 3      | 0.84   | 0.005    | 0.003     | 0 | 29.75 | 19 | 133 | 5  | 992  | 1.4   |
| 2389.055 | 6  | Q9Y2H0       | R.QNSATESADS QNSATES[166. 3      | 0.906  | 0.004    | 0.003     | 0 | 30.41 | 19 | 70  | 4  | 992  | 1.4   |
| 1781.832 | 7  | Q9Y2H5       | R.TKSPDDEVTV TKS[166.9984]F 2    | -0.54  | 0.01     | -0.004    | 1 | 25.15 | 18 | 57  | 2  | 1048 | -2.31 |
| 1552.689 | 8  | Q9Y2H5       | K.SPTDDEVTPS SPT[181.014]DI 2    | 1.722  | 5.90E-05 | 0.002     | 0 | 47.75 | 18 | 48  | 2  | 1048 | 1.24  |
| 1552.689 | 13 | Q9Y2H5       | K.SPTDDEVTPS S[166.9984]PTT 2    | 1.948  | 3.50E-05 | 0.002     | 0 | 50.03 | 18 | 57  | 2  | 1048 | 1.24  |
| 1781.832 | 7  | Q9Y2H5       | R.TKSPDDEVTV T[181.014]KSP1 2    | 0.228  | 0.002    | -0.004    | 1 | 32.83 | 18 | 67  | 3  | 1048 | -2.31 |
| 1125.465 | 4  | Q9Y2H6       | K.MSSPSSPQK MSS[166.9984] 2      | -1.029 | 0.035    | 0.002     | 0 | 19.24 | 17 | 19  | 1  | 1198 | 1.35  |
| 1256.588 | 8  | Q9Y2I7       | R.SASITNLSLR SAS[166.9984] 2     | 1.825  | 5.10E-05 | 0.002     | 0 | 48.8  | 18 | 49  | 1  | 2098 | 1.36  |
| 1922.86  | 14 | Q9Y2I4       | R.QAGAPGSS QAGAPGSSGS[ 2         | 2.024  | 2.60E-06 | 0.002     | 0 | 61.03 | 18 | 61  | 1  | 779  | 1.16  |
| 1157.52  | 7  | Q9Y2I4       | R.AASLDSVATS AAS[166.9984] 2     | -1.107 | 0.04     | 4.00E-04  | 0 | 17.48 | 16 | 17  | 3  | 779  | 0.36  |
| 1603.71  | 9  | Q9Y2K1       | R.KSSTVEIAS KSST[166.9984]T 2    | 0.444  | 0.001    | 0.003     | 1 | 34.98 | 18 | 35  | 1  | 713  | 1.74  |
| 1603.71  | 15 | Q9Y2K1       | R.KSSTVEIAS KSST[181.014] 3      | 0.456  | 0.012    | 0.002     | 1 | 23.92 | 17 | 24  | 2  | 713  | 1.06  |
| 1791.802 | 9  | Q9Y2K2       | K.QLSADSAEAI QLS[166.9984] 2     | 1.183  | 2.20E-04 | 0.002     | 0 | 41.37 | 17 | 41  | 1  | 1263 | 1.29  |
| 1541.721 | 14 | Q9Y2K5       | K.SASTDLGTAD SAST[181.014]I 2    | 0.754  | 4.90E-04 | 0.003     | 0 | 39.09 | 19 |     |    |      |       |

|          |    |        |                              |   |        |          |           |   |       |    |     |    |      |       |
|----------|----|--------|------------------------------|---|--------|----------|-----------|---|-------|----|-----|----|------|-------|
| 2283.957 | 14 | Q9Y2X3 | K.EEPLSEEEPC EEPSEEEPC[16    | 2 | 1.944  | 7.20E-06 | 0.002     | 0 | 56.52 | 18 | 154 | 10 | 529  | 0.88  |
| 2527.062 | 20 | Q9Y2X7 | R.HGSGADSDYI HGS[166.9984]   | 3 | 1.291  | 1.60E-04 | 0.003     | 0 | 44.15 | 19 | 44  | 3  | 761  | 1.33  |
| 2527.062 | 10 | Q9Y2X7 | R.HGSGADSDYI HGS[166.9984]   | 3 | 1.393  | 1.60E-05 | 0.003     | 0 | 54.29 | 19 | 54  | 3  | 761  | 1.33  |
| 2664.204 | 10 | Q9Y320 | K.AGDNPIEQOP AGDNPIEQOPV.3   | 0 | 0.863  | 0.005    | 0.003     | 1 | 27.97 | 17 | 34  | 2  | 296  | 1.27  |
| 2536.109 | 14 | Q9Y320 | K.AGDNPIEQOP AGDNPIEQOPV.3   | 0 | 0.2    | 0.019    | 0.002     | 0 | 22.34 | 18 | 39  | 2  | 296  | 0.85  |
| 2664.204 | 19 | Q9Y320 | K.AGDNPIEQOP AGDNPIEQOPV.3   | 0 | 0.517  | 0.011    | 0.003     | 1 | 24.49 | 17 | 24  | 2  | 296  | 1.27  |
| 2536.109 | 9  | Q9Y320 | K.AGDNPIEQOP AGDNPIEQOPV.3   | 0 | 0.352  | 0.014    | 0.002     | 0 | 23.86 | 18 | 34  | 2  | 296  | 0.85  |
| 2536.109 | 9  | Q9Y320 | K.AGDNPIEQOP AGDNPIEQOPV.3   | 0 | -0.1   | 0.038    | 0.002     | 0 | 19.35 | 18 | 28  | 2  | 296  | 0.85  |
| 1958.684 | 8  | Q9Y343 | K.AESCGSFDET AESS[160.0307   | 2 | 2.159  | 2.90E-06 | 0.002     | 0 | 56.72 | 14 | 57  | 1  | 169  | 0.78  |
| 1549.536 | 8  | Q9Y365 | R.MGGAGGEGG MGGAGGEGGS[      | 2 | 0.447  | 0.001    | -2.00E-04 | 0 | 30    | 13 | 30  | 1  | 291  | -0.13 |
| 1302.558 | 9  | Q9Y383 | R.AMLDQLMGT AMLDQLMGT[S]     | 2 | 1.166  | 2.10E-04 | 0.002     | 0 | 42.21 | 18 | 42  | 1  | 392  | 1.95  |
| 1481.627 | 8  | Q9Y388 | R.EVQAEQSPSS EVQAEQSPSS[S]   | 2 | -1.116 | 0.039    | 1.00E-04  | 0 | 19.39 | 18 | 19  | 2  | 322  | 0.09  |
| 2680.95  | 10 | Q9Y389 | K.DHFYSDDDA DHFYS[166.998    | 3 | 0.402  | 0.014    | 0.003     | 0 | 20.36 | 14 | 20  | 1  | 282  | 0.97  |
| 1946.677 | 9  | Q9Y389 | K.ESDGPDDSRP ESDGPDDSRPE[    | 2 | -0.723 | 0.015    | 0.002     | 0 | 20.32 | 15 | 59  | 3  | 282  | 0.97  |
| 1946.677 | 6  | Q9Y389 | K.ESDGPDDSRP ESDGPDDSRPE[    | 2 | -0.325 | 0.006    | 0.002     | 0 | 24.3  | 15 | 25  | 2  | 282  | 0.97  |
| 1946.677 | 12 | Q9Y389 | K.ESDGPDDSRP ESDGPDDSRPE[    | 2 | -1.235 | 0.048    | 0.002     | 0 | 15.2  | 15 | 15  | 3  | 282  | 0.97  |
| 1206.6   | 11 | Q9Y310 | R.NLDFQDVLK NLDQDVLK         | 2 | -0.141 | 0.005    | 0.002     | 0 | 29.12 | 18 | 29  | 1  | 505  | 1.66  |
| 1804.694 | 9  | Q9Y3M8 | K.KGDDSDDEDL KGDSD[166.998   | 2 | 1.455  | 1.10E-04 | 0.001     | 1 | 41.09 | 14 | 41  | 1  | 1113 | 0.69  |
| 1267.572 | 9  | Q9Y3Q8 | K.SPDPFGAVAA S[166.9984]PDI  | 2 | 0.506  | 0.001    | 0.002     | 0 | 35.61 | 18 | 36  | 1  | 395  | 1.47  |
| 1213.561 | 6  | Q9Y3R0 | R.RQSPPEEFK.G RQSP[166.9984] | 2 | -0.946 | 0.027    | 0.002     | 1 | 22.09 | 19 | 22  | 1  | 1128 | 1.94  |
| 1330.629 | 8  | Q9Y3T6 | R.FGSTLQDLEH FGST[181.014]   | 2 | -1.033 | 0.032    | 0.002     | 0 | 21.21 | 19 | 21  | 1  | 480  | 1.87  |
| 2158.954 | 9  | Q9Y3X0 | K.EGAASPAPET EGAASPAPETPI    | 2 | -0.69  | 0.016    | 0.002     | 0 | 23.65 | 18 | 24  | 2  | 531  | 1.17  |
| 1751.764 | 8  | Q9Y446 | R.AGGLDWPEA AGGLDWPEATI      | 2 | -0.418 | 0.008    | 0.002     | 0 | 25.37 | 17 | 97  | 5  | 797  | 0.97  |
| 1133.487 | 6  | Q9Y446 | R.ADYDTLSR.S ADYDTLS[166.9   | 2 | 0.191  | 0.002    | 8.00E-04  | 0 | 34.46 | 20 | 97  | 5  | 797  | 0.69  |
| 1643.756 | 10 | Q9Y446 | R.LSSGFDIDIP LSS[166.9984]C  | 2 | 2.172  | 1.30E-07 | 0.002     | 0 | 75.12 | 19 | 115 | 4  | 797  | 1.27  |
| 1751.764 | 10 | Q9Y446 | R.AGGLDWPEA AGGLDWPEATI      | 2 | 1.09   | 2.40E-04 | 0.002     | 0 | 40.43 | 17 | 115 | 4  | 797  | 0.97  |
| 1074.429 | 7  | Q9Y446 | R.SAVDLSCSR.S [166.9984]AVI  | 2 | -0.848 | 0.023    | 0.001     | 0 | 19.05 | 15 | 91  | 5  | 797  | 0.89  |
| 3214.349 | 7  | Q9Y478 | K.CSDVLSLSSP C[160.0307]SD   | 3 | 0.3    | 0.016    | 0.002     | 0 | 23.32 | 18 | 23  | 1  | 270  | 0.62  |
| 3214.349 | 14 | Q9Y478 | K.CSDVLSLSSP C[160.0307]SD   | 3 | 1.015  | 0.003    | 0.002     | 0 | 30.51 | 18 | 31  | 1  | 270  | 0.62  |
| 1212.551 | 9  | Q9Y4A5 | R.GLSVDSAEQV GLS[166.9984]   | 2 | 1.288  | 1.50E-04 | 4.00E-04  | 0 | 44.43 | 19 | 47  | 4  | 3859 | 0.36  |
| 1368.652 | 5  | Q9Y4A5 | R.GLSVDSAEQV GLS[166.9984]   | 2 | -0.903 | 0.026    | 0.002     | 1 | 21.51 | 18 | 45  | 6  | 3859 | 1.71  |
| 1962.779 | 10 | Q9Y4B5 | K.REGPVGGESR REGPVGGES[16    | 2 | 0.076  | 0.03     | 0.002     | 1 | 19.1  | 16 | 25  | 2  | 1905 | 1.04  |
| 1806.677 | 5  | Q9Y4B5 | R.EGVPVGGESD EGVPVGGESD[1    | 2 | -0.658 | 0.016    | 0.002     | 0 | 21.97 | 16 | 25  | 2  | 1905 | 0.97  |
| 1806.677 | 9  | Q9Y4B5 | R.EGVPVGGESD EGVPVGGES[16    | 2 | -0.65  | 0.015    | 0.002     | 0 | 22.03 | 16 | 22  | 1  | 1905 | 0.97  |
| 3207.264 | 27 | Q9Y4C8 | K.DPAEPETVPD DPAEPETVPDG     | 3 | 0.521  | 0.011    | -4.00E-04 | 0 | 24.55 | 17 | 26  | 3  | 960  | -0.12 |
| 1250.614 | 10 | Q9Y4D2 | K.SPQQEILLR.S [166.9984]PSC  | 2 | -1.009 | 0.029    | 0.001     | 0 | 21.46 | 19 | 21  | 2  | 1042 | 0.95  |
| 1285.582 | 8  | Q9Y4E8 | K.SPQASNFSTLU S[166.9984]PG  | 2 | -0.903 | 0.023    | 0.002     | 0 | 22.52 | 19 | 52  | 2  | 981  | 1.64  |
| 3529.327 | 18 | Q9Y4E8 | K.GASAAITGPII GASAAITGPILES  | 3 | 1.291  | 3.60E-05 | 0.002     | 0 | 46.34 | 14 | 52  | 2  | 981  | 0.51  |
| 1525.679 | 11 | Q9Y4F1 | K.VSAGEPGSHF VSAGEPGSHPS[    | 2 | 0.005  | 0.003    | -3.00E-04 | 0 | 30.6  | 18 | 31  | 3  | 1045 | -0.19 |
| 1523.71  | 9  | Q9Y4F1 | R.LGAPENSIGS LGAPENSIGIST[   | 2 | -0.373 | 0.007    | 0.002     | 0 | 27.82 | 19 | 46  | 4  | 1045 | 1.25  |
| 1433.646 | 10 | Q9Y4F5 | R.SPEPDGPAPA S[166.9984]PEF  | 2 | 0.487  | 0.001    | 0.002     | 0 | 35.42 | 18 | 35  | 6  | 1589 | 1.78  |
| 1708.67  | 8  | Q9Y4F5 | K.HEDGTQSDSE HEDGTQSD[166    | 2 | -0.911 | 0.023    | 0.002     | 0 | 20.44 | 17 | 25  | 9  | 1589 | 1.19  |
| 1614.68  | 8  | Q9Y4F5 | R.AGSFTGTSP AGS[166.9984]    | 2 | 2.091  | 2.40E-05 | -0.002    | 0 | 49.44 | 16 | 68  | 5  | 1589 | -1.52 |
| 1454.595 | 6  | Q9Y4F5 | R.SQSFTSPSGI SQS[166.9984]   | 2 | -0.922 | 0.025    | 0.002     | 0 | 21.31 | 18 | 24  | 6  | 1589 | 1.53  |
| 1392.627 | 10 | Q9Y4H2 | R.HNSASVENVS HNSAS[166.998   | 2 | 2.159  | 4.90E-06 | 0.001     | 0 | 57.42 | 17 | 125 | 3  | 1338 | 0.86  |
| 1392.627 | 10 | Q9Y4H2 | R.HNSASVENVS HNS[166.9984]   | 2 | 2.172  | 2.50E-06 | 0.001     | 0 | 60.25 | 17 | 151 | 4  | 1338 | 1     |
| 1975.839 | 11 | Q9Y4H2 | K.SSEGGVGVGI SSEGGVGVGPGC    | 2 | 2.159  | 1.10E-05 | 5.00E-04  | 0 | 54.86 | 18 | 125 | 3  | 1338 | 0.23  |
| 1089.498 | 5  | Q9Y4H2 | R.TYSLTTPAR.C TYS[166.9984]  | 2 | -1.045 | 0.037    | 0.001     | 0 | 21.09 | 19 | 117 | 4  | 1338 | 1.19  |
| 1750.663 | 12 | Q9Y4H2 | K.ASSPAESSPET ASSPAESS[166.  | 2 | 0.992  | 3.00E-04 | 0.001     | 0 | 37.47 | 15 | 104 | 4  | 1338 | 0.6   |
| 1750.663 | 9  | Q9Y4H2 | K.ASSPAESSPET ASS[166.9984]  | 2 | 1.304  | 1.50E-04 | 0.001     | 0 | 40.59 | 15 | 87  | 4  | 1338 | 0.6   |
| 1657.736 | 6  | Q9Y4I8 | R.TQFEDLVPSF TQFEDLVPS[16    | 2 | -1.037 | 0.037    | 0.002     | 0 | 19.18 | 17 | 19  | 2  | 743  | 1.47  |
| 1753.728 | 10 | Q9Y4K1 | K.STDSPGADA ST[181.014]DSI   | 2 | 1.974  | 3.60E-05 | 0.002     | 0 | 50.29 | 18 | 85  | 3  | 1723 | 1.26  |
| 2034.855 | 16 | Q9Y4K1 | K.DTVCQSPISST DTC[160.0307]  | 2 | 0.055  | 0.003    | 0.002     | 0 | 30.17 | 17 | 64  | 2  | 1723 | 1.06  |
| 1749.689 | 6  | Q9Y4K4 | R.ISSYPEDNFP I[166.9984]Y    | 2 | -0.971 | 0.033    | 5.00E-04  | 0 | 19.84 | 17 | 71  | 3  | 846  | 0.3   |
| 2471.087 | 18 | Q9Y4K4 | R.ROSSPSPGVP RQS[166.9984]   | 3 | 1.291  | 2.40E-04 | 0.003     | 1 | 42.18 | 18 | 44  | 2  | 846  | 1.13  |
| 2471.087 | 12 | Q9Y4K4 | R.ROSSPSPGVP RQS[166.9984]   | 3 | 1.256  | 1.50E-05 | 0.003     | 1 | 54.31 | 18 | 54  | 2  | 846  | 1.13  |
| 2471.087 | 14 | Q9Y4K4 | R.ROSSPSPGVP RQS[166.9984]   | 3 | 1.205  | 6.80E-06 | 0.003     | 1 | 57.61 | 18 | 58  | 2  | 846  | 1.13  |
| 2087.874 | 7  | Q9Y4W2 | R.MEVGFSTGI MEVGFSTGTGE      | 2 | 1.562  | 8.20E-05 | 0.001     | 0 | 46.17 | 18 | 92  | 3  | 734  | 0.69  |
| 1639.696 | 16 | Q9Y4W2 | K.AQQEQEGS AQQEQEGS[1        | 2 | 0.007  | 0.003    | 0.003     | 0 | 30.62 | 18 | 94  | 3  | 734  | 1.7   |
| 2704.036 | 14 | Q9Y4X0 | K.LSSPPSPGSGC LSS[166.9984]  | 3 | 1.224  | 0.002    | 0.004     | 0 | 32.77 | 17 | 33  | 2  | 333  | 1.31  |
| 2932.232 | 9  | Q9Y520 | R.SVEDVRPHHT SVEDVRPHHT[1    | 4 | 0.671  | 0.007    | 0.004     | 0 | 28.28 | 19 | 105 | 6  | 2896 | 1.51  |
| 2171.872 | 14 | Q9Y520 | R.QRGSETDTE QRG[S[166.998    | 3 | -0.02  | 0.031    | 0.002     | 1 | 20.14 | 18 | 69  | 6  | 2896 | 0.95  |
| 1191.566 | 5  | Q9Y520 | K.LPDLSPVENK LPDLS[166.998   | 2 | 1.781  | 5.70E-05 | 0.001     | 0 | 48.36 | 18 | 105 | 6  | 2896 | 1.2   |
| 1303.545 | 7  | Q9Y520 | R.SESSDFEVVPI SESS[166.9984] | 2 | -1.172 | 0.048    | 0.002     | 0 | 17.83 | 17 | 105 | 6  | 2896 | 1.19  |
| 2932.232 | 15 | Q9Y520 | R.SVEDVRPHHT S[166.9984]VE   | 3 | 1.127  | 8.60E-04 | 0.002     | 0 | 36.5  | 18 | 68  | 9  | 2896 | 0.52  |
| 1278.515 | 7  | Q9Y580 | R.SFSPENFQR SF[S[166.9984]S  | 2 | -0.871 | 0.026    | 0.002     | 0 | 19.84 | 16 | 43  | 2  | 266  | 1.22  |
| 1309.528 | 6  | Q9Y580 | R.MNSVPLYADI MNS[166.9984]   | 2 | -0.026 | 0.004    | 0.001     | 0 | 27.29 | 15 | 38  | 2  | 266  | 0.74  |
| 1278.515 | 5  | Q9Y580 | R.SFSPENFQR SFSS[166.9984]   | 2 | -1.052 | 0.039    | 0.002     | 0 | 18.06 | 16 | 34  | 2  | 266  | 1.22  |
| 2406.99  | 19 | Q9Y5B9 | K.NEDEEEEE NEDEEEEEKE[       | 3 | 1.258  | 0.002    | 0.003     | 1 | 33.9  | 19 | 62  | 3  | 1047 | 1.4   |
| 1291.544 | 14 | Q9Y5B9 | K.DWDELEEEAI DWDELEEEAR      | 2 | 0.623  | 6.70E-04 | 0.002     | 0 | 37.78 | 19 | 60  | 3  | 1047 | 1.34  |
| 1017.485 | 5  | Q9Y5B9 | K.DEAEDLLGR.C DEAEDLLGR      | 2 | -0.3   | 0.006    | 5.00E-04  | 0 | 27.53 | 18 | 41  | 4  | 1047 | 0.48  |
| 2061.732 | 10 | Q9Y5J1 | R.VQEHEDSGD VQEHEDS[166.]    | 2 | 0.085  | 0.003    | 7.00E-04  | 0 | 29.4  | 16 | 91  | 2  | 556  | 0.36  |
| 1981.766 | 20 | Q9Y5J1 | R.VQEHEDSGD VQEHEDS[166.]    | 2 | 2.172  | 1.30E-06 | 0.002     | 0 | 64.71 | 18 | 75  | 2  | 556  | 0.99  |
| 1218.54  | 7  | Q9Y5K6 | K.SVDFDSLTVR.S [166.9984]VDI | 2 | 0.437  | 0.001    | 0.002     | 0 | 35.92 | 19 | 36  | 2  | 639  | 1.38  |
| 2528.104 | 25 | Q9Y5Q9 | K.GKLSAENPD GKLS[166.9984]   | 3 | 0.872  | 0.005    | 0.002     | 1 | 30.04 | 19 | 30  | 1  | 886  | 0.85  |
| 2300.908 | 13 | Q9Y5S2 | K.HSTPSNSNPN HSTPSNSNPNPC    | 3 | 1.291  | 7.20E-04 | 0.002     | 0 | 37.07 | 18 | 51  | 5  | 1711 | 0.99  |
| 2220.942 | 19 | Q9Y5S2 | K.HSTPSNSNPN HSTPSNSNPNPC    | 3 | 0.963  | 0.003    | 0.004     | 0 | 30.97 | 19 | 46  | 3  | 1711 | 1.98  |
| 2222.926 | 14 | Q9Y5S9 | R.MREDYDSVEI MREDYDSVEIQ     | 3 | 1.291  | 6.10E-05 | 0.001     | 1 | 47.93 | 18 | 65  | 3  | 174  | 0.46  |
| 2302.892 | 12 | Q9Y5S9 | R.MREDYDSVEI MREDYDS[166.    | 3 | 1.224  | 0.002    | 0.002     | 1 | 33.61 | 18 | 57  | 4  | 174  | 0.74  |
| 1005.367 | 6  | Q9Y5S9 | R.GFSGEEGSR.J GFGS[166.9984] | 2 | -0.215 | 0.005    | 0.001     | 0 | 23.4  | 13 | 47  | 3  | 174  | 1.27  |
| 2185.997 | 15 | Q9Y608 | R.RGSGDTSUUI RGS[166.9984]   | 2 | 2.159  | 2.90E-06 | 0.002     | 1 | 61.84 | 19 | 105 | 6  | 721  | 1.12  |
| 1529.659 | 16 | Q9Y608 | R.NSASATTPLS NSASATTPLSG     | 2 | -0.548 | 0.012    | 0.002     | 0 | 24.07 | 17 | 105 | 6  | 721  | 1.22  |
| 1529.659 | 7  | Q9Y608 | R.NSASATTPLS NSASATTPLS[1    | 2 | 0.255  | 0.002    | 0.002     | 0 | 32.1  | 17 | 105 | 6  | 721  | 1.03  |
| 1529.659 | 10 | Q9Y608 | R.NSASATTPLS NSASATTPLSG     | 2 | -0.35  | 0.008    | 0.002     | 0 | 26.05 | 17 | 76  | 5  | 721  | 1.35  |
| 2185.997 | 11 | Q9Y608 | R.RGSGDTSUUI RGS[166.9984]   | 2 | 1.193  |          |           |   |       |    |     |    |      |       |

|          |    |             |                                    |        |          |          |   |       |    |    |   |      |      |
|----------|----|-------------|------------------------------------|--------|----------|----------|---|-------|----|----|---|------|------|
| 1803.718 | 10 | Q9Y6M7      | K.EDGRESPSYD EDGRES[166.9984]FA1 2 | -0.334 | 0.007    | 0.002    | 1 | 26.2  | 17 | 26 | 3 | 1214 | 1.05 |
| 817.349  | 5  | Q9Y6M7_Q6U8 | R.SFADIGK.K S[166.9984]FA1 2       | -1.071 | 0.034    | 9.00E-04 | 0 | 21.82 | 20 | 30 |   |      | 1.04 |
| 1917.841 | 17 | Q9Y6Q9      | K.TPHDILEDINA TPHDILEDINAS[ 3      | -0.201 | 0.048    | 0.003    | 0 | 20.35 | 20 | 20 | 1 | 1424 | 1.63 |
| 1886.754 | 10 | Q9Y6X9      | R.SVAVSDEEEV SVAVS[166.998 2       | 2.159  | 4.10E-06 | 7.00E-04 | 0 | 59.06 | 18 | 67 | 5 | 1032 | 0.39 |
| 1029.549 | 4  | Q9Y6X9      | R.SPPLPAVIR.N S[166.9984]PPI 2     | -0.476 | 0.01     | 0.001    | 0 | 25.79 | 18 | 67 | 5 | 1032 | 0.94 |

**A549 Cell Line, Treated with DMSO vs. 20uM TRC-794 for 12hrs**

Protein Uniprot ID for the parent protein  
 Gene HUGO gene name for the parent protein  
 Peptide identified phosphopeptide fragment  
 Phosphosite(s) specific phosphorylated residues from the peptide  
 p p-value (unadjusted) from Welch's 2-tailed t-test  
 FC mean fold change: TRC-794/DMSO  
 p.adj p-value adjusted for multiple hypothesis testing using the Benjamini-Hochberg method

| Protein | Gene    | Peptide                                                 | Phosphosite(s) | p          | FC         | p.adj      |
|---------|---------|---------------------------------------------------------|----------------|------------|------------|------------|
| Q9NRG9  | AAAS    | FSPVLGR                                                 | S495           | 0.46773439 | 0.85079635 | 0.74813177 |
| Q2M2I8  | AAK1    | VGSLTPPSSPK                                             | T620,S624      | 0.36659475 | 1.2355     | 0.69754271 |
| Q9NY61  | AATF    | AGDRNSEDDGVVMTFSSVK                                     | S203           | 0.43737342 | 0.75041256 | 0.73338954 |
| P33527  | ABCC1   | QLSSSSSYGDISR                                           | S915           | 0.52657496 | 0.87462571 | 0.77967028 |
| Q92887  | ABCC2   | NVNSLKEDEELVK                                           | S938           | 0.95693876 | 1.02549298 | 0.98388755 |
| O15438  | ABCC3   | QLSALSSDGEGQGRPVPR                                      | S908,S911      | 0.19254379 | 0.64030612 | 0.57728191 |
| O15438  | ABCC3   | QLSALSSDGEGQGRPVPR                                      | S911           | 0.58993513 | 0.91674551 | 0.82197092 |
| O15439  | ABCC4   | DNEESEQPPVPGTPTLR                                       | T646           | 0.28106215 | 0.8191344  | 0.6455595  |
| Q8NE71  | ABCF1   | QQPPEPEWIGDGESTSPSDK                                    | T21            | 0.00269787 | 0.77501516 | 0.77314524 |
| Q8NE71  | ABCF1   | QQPPEPEWIGDGESTSPSDK                                    | S22            | 0.08327882 | 0.78600269 | 0.50397847 |
| Q8NE71  | ABCF1   | GGNVFAALIQQDSEEEEEEEK                                   | S140           | 0.26748191 | 1.54195968 | 0.6348778  |
| Q8NE71  | ABCF1   | AEQGSSEEEGEGEEEEEGGESK                                  | S228           | 0.37568613 | 0.81089067 | 0.7039516  |
| Q8NE71  | ABCF1   | KAEQGSSEEEGEGEEEEEGGESK                                 | S228           | 0.5937946  | 0.97087379 | 0.82293287 |
| P08910  | ABHD2   | LQCSDTQEVEADLE                                          | T417           | 0.12163071 | 16.8140994 | 0.53786538 |
| Q9NYB9  | ABI2    | NMAPSQQSPVR                                             | S227           | 0.13414795 | 0.71508265 | 0.5475768  |
| P00519  | ABL1    | GQGESDPLDHEPAVSPLLPR                                    | S569           | 0.95442891 | 1.0130009  | 0.98367301 |
| P42684  | ABL2    | SPSSLLEDAK                                              | S631           | 0.35231989 | 0.87977169 | 0.68437095 |
| P42684  | ABL2    | DKSPSSLLEDAK                                            | S631           | 0.81967146 | 0.96650845 | 0.93258953 |
| O14639  | ABLIM1  | TLSPTPSAEGYQDVR                                         | S431,S435      | 0.17683257 | 0.82421049 | 0.56898248 |
| O14639  | ABLIM1  | SSGREDEEELLR                                            | S587           | 0.38380314 | 0.77455292 | 0.70957373 |
| O14639  | ABLIM1  | TASLPGYGR                                               | S655           | 0.76756182 | 0.93756011 | 0.91280488 |
| O14639  | ABLIM1  | TLSPTPSAEGYQDVR                                         | S431           | 0.84388201 | 1.01693811 | 0.94383208 |
| O14639  | ABLIM1  | STSQGSINSPVYSR                                          | S452           | 0.85464371 | 0.97079757 | 0.94852754 |
| Q13085  | ACACA   | FIIGSVSDNSEDEISNLVK                                     | S29            | 0.14609644 | 2.52720527 | 0.55352644 |
| Q13085  | ACACA   | SSMSGSLHLVK                                             | S80            | 0.6357046  | 0.90399074 | 0.8428508  |
| Q15057  | ACAP2   | SSPSTGSLDSGNEK                                          | S384           | 0.13023577 | 1.1651483  | 0.54344847 |
| Q9UKV3  | ACIN1   | LSEGSQAEEEEEDQETPSR                                     | S240           | 0.06546099 | 0.73275109 | 0.48587858 |
| Q9UKV3  | ACIN1   | GVPAGNSDTEGGQPRK                                        | S838           | 0.19376826 | 1.20398912 | 0.57728191 |
| Q9UKV3  | ACIN1   | LSEGSQAEEEEEDQETPSR                                     | S243           | 0.2162419  | 0.83078394 | 0.60400413 |
| Q9UKV3  | ACIN1   | TTSPLIEEER                                              | S365           | 0.25157257 | 1.35638896 | 0.61962985 |
| Q9UKV3  | ACIN1   | ASLVALPEQTASEEETPPPLTK                                  | S410           | 0.26963557 | 1.32782464 | 0.63502787 |
| Q9UKV3  | ACIN1   | LSEGSQAEEEEEDQETPSR                                     | S240,S243      | 0.31417082 | 0.66201095 | 0.66321511 |
| Q9UKV3  | ACIN1   | TAQVSPPPR                                               | S1004          | 0.4598424  | 1.12514511 | 0.74160036 |
| Q9UKV3  | ACIN1   | GVPAGNSDTEGGQPRK                                        | S838           | 0.68483385 | 0.93611298 | 0.86760918 |
| Q9UKV3  | ACIN1   | SLSPGVSR                                                | S657           | 0.89517713 | 1.01778297 | 0.9622316  |
| P53396  | ACLY    | TASFESRADEVAPAK                                         | S455           | 0.77302143 | 0.92186707 | 0.91361901 |
| P53396  | ACLY    | TASFESRADEVAPAK                                         | S459           | 0.94734466 | 1.02133437 | 0.98213577 |
| P60709  | ACTB    | SYELPDGQVITIGNER                                        | S239           | 0.40561607 | 1.16432134 | 0.7160132  |
| O43707  | ACTN4   | FAIQDISVEETSAK                                          | S159           | 0.170057   | 1.42687018 | 0.56526141 |
| P78536  | ADAM17  | SFEDLTDHPVTR                                            | S791           | 0.24681664 | 1.47201781 | 0.61377267 |
| Q13443  | ADAM9   | HVSPVTPPR                                               | S758           | 0.46571113 | 1.36873593 | 0.74679609 |
| P55265  | ADAR    | TAESQTPPTSATSFSGK                                       | T601           | 0.31257184 | 0.62157464 | 0.66321511 |
| P35611  | ADD1    | SPGSPVGEETGSPPK                                         | S358           | 0.08757613 | 1.2716003  | 0.50672665 |
| P35611  | ADD1    | EEEAHRPPSPTEAPTEASPEPAPDPAPVAEEAAPSVEEGAADPGSDGSPGK     | S669,S710      | 0.1532438  | 0.79136423 | 0.56888781 |
| P35611  | ADD1    | AAVVTSPPTTAPHK                                          | S12            | 0.45467667 | 0.79349252 | 0.73892495 |
| P35611  | ADD1    | EEEAHRPPSPTEAPTEASPEPAPDPAPVAEEAAPSVEEGAADPGSDGSPGK     | S669           | 0.63543681 | 1.13636364 | 0.8428508  |
| P35611  | ADD1    | EEEAHRPPSPTEAPTEASPEPAPDPAPVAEEAAPSVEEGAADPGSDGSPGKSPSK | S669,S716      | 0.78983537 | 0.9242177  | 0.92178686 |
| P35612  | ADD2    | SRSPSTESQLMSK                                           | S530           | 0.16384283 | 0.65316651 | 0.55979634 |
| P35612  | ADD2    | TESVTSMPSPGEGSPSK                                       | S693,S697      | 0.23926393 | 0.71762864 | 0.61121846 |
| P35612  | ADD2    | ETAPPEEGSPAK                                            | S592           | 0.84971869 | 0.98240136 | 0.94645687 |
| Q9UEY8  | ADD3    | IEEVLSPGSPSK                                            | S673,S677      | 0.27953405 | 0.7074493  | 0.6455595  |
| Q9H2P0  | ADNP    | NVHSEDFENR                                              | S98            | 0.02397135 | 0.69273286 | 0.41830815 |
| Q9H2P0  | ADNP    | VIPEDASESEK                                             | S921           | 0.42946574 | 0.88667096 | 0.73017801 |
| Q9H2P0  | ADNP    | LMHNASDSEVDQDDVVEWK                                     | S953           | 0.45147296 | 0.7458996  | 0.73811209 |
| Q6ZNI8  | AEBP2   | RGSLEMSDDGPELSR                                         | S206           | 0.02648423 | 0.57013889 | 0.41830815 |
| Q6ZNI8  | AEBP2   | SLSPGAASSSSGDGDGK                                       | S141           | 0.06128089 | 0.72155204 | 0.47702638 |
| Q8N556  | AFAP1   | LSSERPSSDGEGVVENGITTCNGK                                | S283           | 0.00360839 | 0.23375786 | 0.28722668 |
| Q8N556  | AFAP1   | KLSSERPSSDGEGVVENGITTCNGK                               | S277,S283      | 0.04675811 | 0.55194346 | 0.45625798 |
| Q8N556  | AFAP1   | EAYSGCSPVDSECPSPSPVHK                                   | S264           | 0.90602621 | 0.9808721  | 0.96653745 |
| Q8N556  | AFAP1   | SGTSSPQSPVFR                                            | S668           | 0.95691891 | 0.99474869 | 0.98388755 |
| Q8N4X5  | AFAP1L2 | STSLPEVPR                                               | T345           | 0.49261125 | 0.90576923 | 0.76351366 |
| Q8N4X5  | AFAP1L2 | KFSEPNYIDGLPSQDR                                        | S484           | 0.94532364 | 1.02753034 | 0.98175359 |
| Q9UHB7  | AFF4    | VSPASSVDSNIPSSQGYK                                      | S487           | 0.70446035 | 0.91816291 | 0.87860911 |
| P52594  | AGFG1   | GTPSQSPVGR                                              | T177,S181      | 0.39475029 | 0.80744102 | 0.71403973 |
| Q8WYP5  | AHCTF1  | TTSFLNSPEK                                              | S1283          | 0.01301754 | 0.53084208 | 0.39919401 |
| Q8WYP5  | AHCTF1  | SPLYLVSR                                                | S1142          | 0.08895148 | 0.71723617 | 0.5099787  |
| Q8WYP5  | AHCTF1  | LPISDPPDTQEIHVIEQEK                                     | S1513          | 0.1374433  | 1.34574034 | 0.54797298 |
| Q8WYP5  | AHCTF1  | EHQEMDEGSQLEK                                           | S1297          | 0.34051879 | 0.71825586 | 0.67842858 |
| Q8WYP5  | AHCTF1  | NLSFNELYPSTLK                                           | S1541          | 0.65848102 | 0.92753594 | 0.85416521 |
| Q09666  | AHNAK   | VDIDTDPIDIHPEGK                                         | T4100          | 0.06855218 | 0.48328376 | 0.49083932 |
| Q09666  | AHNAK   | LPSGGAASPTGSAVDIR                                       | S216,S220      | 0.08624071 | 0.50517216 | 0.50426655 |

|        |        |                                           |             |            |            |            |
|--------|--------|-------------------------------------------|-------------|------------|------------|------------|
| Q09666 | AHNAK  | GGVTGSPEASISGSK                           | S5735       | 0.09032987 | 0.14297357 | 0.51018936 |
| Q09666 | AHNAK  | DDGVFVQEVQTQNSPAAR                        | S41         | 0.11450637 | 0.63519553 | 0.53343618 |
| Q09666 | AHNAK  | ISMSEVDLNVAAPK                            | S570        | 0.1168826  | 0.58240274 | 0.53343618 |
| Q09666 | AHNAK  | ADLDVSGPK                                 | S3054       | 0.12304685 | 0.65651998 | 0.5389189  |
| Q09666 | AHNAK  | LPSGSGAASPTGSAVDIR                        | S212        | 0.1250553  | 1.49739176 | 0.5401424  |
| Q09666 | AHNAK  | MPEMSJK                                   | S1445       | 0.13305986 | 0.51752299 | 0.5475768  |
| Q09666 | AHNAK  | GDLASVPSMK                                | S5321       | 0.15731873 | 0.48246609 | 0.55688781 |
| Q09666 | AHNAK  | ASLGSLEGEAEAEASSPK                        | S5752       | 0.21050938 | 1.23129021 | 0.59719466 |
| Q09666 | AHNAK  | ASLGSLEGEAEAEASSPK                        | S5749       | 0.27025279 | 1.2445946  | 0.63502787 |
| Q09666 | AHNAK  | LPSGSGAASPTGSAVDIR                        | S210        | 0.27529944 | 1.37368501 | 0.64019666 |
| Q09666 | AHNAK  | SEDGVEGDLGETQSR                           | S135        | 0.28814337 | 0.71509648 | 0.65115864 |
| Q09666 | AHNAK  | FGTFGGLGSK                                | S5830       | 0.28922768 | 0.64457949 | 0.65205353 |
| Q09666 | AHNAK  | LQGSVSLASK                                | S5857       | 0.3009055  | 0.73924324 | 0.65817287 |
| Q09666 | AHNAK  | GDRSPEPGQTWTR                             | S93         | 0.33828917 | 1.1464061  | 0.67736506 |
| Q09666 | AHNAK  | AEAPLPSPK                                 | S5110       | 0.3473142  | 0.79668813 | 0.68170331 |
| Q09666 | AHNAK  | DIDISSPEFK                                | S177        | 0.34854148 | 0.9074819  | 0.68327828 |
| Q09666 | AHNAK  | GSEVGFHGAAPDISVK                          | S5530       | 0.35162194 | 0.67238003 | 0.68418829 |
| Q09666 | AHNAK  | ASLGSLEGEAEAEASSPK                        | S5752,S5763 | 0.42553894 | 0.83194589 | 0.7291324  |
| Q09666 | AHNAK  | GKFSLFK                                   | S5769       | 0.4343339  | 0.65938743 | 0.73182286 |
| Q09666 | AHNAK  | FGTFGGLGSK                                | T5824       | 0.4409174  | 0.75223259 | 0.73571682 |
| Q09666 | AHNAK  | LPSGSGAASPTGSAVDIR                        | S216        | 0.45485508 | 0.74240533 | 0.73892495 |
| Q09666 | AHNAK  | GGVTGSPEASISGSK                           | S5731       | 0.49583415 | 1.09130264 | 0.76439249 |
| Q09666 | AHNAK  | MPSLEISAPK                                | S4908       | 0.51200736 | 1.27136665 | 0.77271948 |
| Q09666 | AHNAK  | LPSGSGAASPTGSAVDIR                        | S210,S216   | 0.53912203 | 0.88769326 | 0.78808839 |
| Q09666 | AHNAK  | LKSEDEGVEGDLGETQSR                        | S135        | 0.553234   | 0.89820579 | 0.79781836 |
| Q09666 | AHNAK  | VSVGAPDLSLEAEGSIK                         | S5400       | 0.60792112 | 1.20469973 | 0.82983763 |
| Q09666 | AHNAK  | EVFSSCSSEVVLSGDDDEEYQR                    | S115        | 0.69233142 | 1.08929491 | 0.8717114  |
| Q09666 | AHNAK  | ASLGSLEGEAEAEASSPK                        | S5763       | 0.79807933 | 1.02675277 | 0.92420484 |
| Q09666 | AHNAK  | ISMQDVDSLGLSPK                            | S511        | 0.80195907 | 0.91922914 | 0.92455018 |
| Q09666 | AHNAK  | GHYEVTGSDDETGK                            | S5841       | 0.89437048 | 0.9939577  | 0.96166467 |
| Q8IVF2 | AHNAK2 | DAHDDVSPSTDTTEAQLTVER                     | S294        | 0.00314978 | 1.27739464 | 1.07114524 |
| Q8IVF2 | AHNAK2 | SKSTEDGAELEEQK                            | T5715       | 0.08349466 | 1.83891956 | 0.50397847 |
| Q8IVF2 | AHNAK2 | LGFSSSPTK                                 | S5707       | 0.1227945  | 0.75965665 | 0.5389189  |
| Q8IVF2 | AHNAK2 | SKSTEDGAELEEQK                            | S5714       | 0.14783848 | 1.52594325 | 0.55352644 |
| Q8IVF2 | AHNAK2 | ERLSWPK                                   | S260        | 0.18302858 | 1.22835991 | 0.57200583 |
| Q8IVF2 | AHNAK2 | LSTSGFEWSSK                               | S4634       | 0.18687153 | 0.66820584 | 0.57474321 |
| Q8IVF2 | AHNAK2 | IPSLGWSPSK                                | S593        | 0.26593613 | 0.65299495 | 0.63400981 |
| Q8IVF2 | AHNAK2 | VQMPSLK                                   | S1253       | 0.31918278 | 0.79586086 | 0.66811614 |
| Q8IVF2 | AHNAK2 | LSTSGFEWSSK                               | S4642       | 0.59139164 | 0.80702505 | 0.82284423 |
| Q8IVF2 | AHNAK2 | VQMPSFK                                   | S1583       | 0.59955212 | 0.84648541 | 0.82561275 |
| Q8IVF2 | AHNAK2 | LPEGPLPEGASLK                             | S753        | 0.60219184 | 0.85240888 | 0.82726314 |
| Q8IVF2 | AHNAK2 | LQMPSFK                                   | S1418       | 0.62588448 | 0.81990521 | 0.8387339  |
| Q8IVF2 | AHNAK2 | DAHDDVSPSTDTTEAQLTVER                     | S294,S297   | 0.79670415 | 1.07868649 | 0.92373279 |
| Q8IVF2 | AHNAK2 | LPEGPVPEGASLK                             | S4046       | 0.82100351 | 1.06944051 | 0.93321117 |
| Q8IVF2 | AHNAK2 | VDMPSFK                                   | S1913       | 0.82510043 | 0.93105124 | 0.93589378 |
| P02765 | AHSG   | CDSSPDSAEVDRK                             | S138        | 0.22765863 | 1.9975546  | 0.6080317  |
| Q96IF1 | AJUBA  | LEPTAPALSPR                               | S119        | 0.79910044 | 1.0410685  | 0.92445479 |
| Q92667 | AKAP1  | SESSGILNPTDMR                             | S105        | 0.59312832 | 0.93856604 | 0.62844423 |
| O43572 | AKAP10 | QSSLAEPVSPSK                              | S187        | 0.48725698 | 0.91088479 | 0.75953527 |
| Q9UKA4 | AKAP11 | SFSEDFVQSK                                | S158        | 0.18952895 | 0.55351828 | 0.57509931 |
| Q02952 | AKAP12 | RGGGDDEESGEHTQVPADSPDSQEEQK               | S554        | 0.03415756 | 2.47784463 | 0.43874459 |
| Q02952 | AKAP12 | LTASEQAHPQEPAESAEHRLSAEYK                 | S371        | 0.03513924 | 1.89461883 | 0.43874459 |
| Q02952 | AKAP12 | ETGTDGILAGSQEHDPGQSSSPEQAGSPTEGEGVSTWESFK | S743        | 0.04819485 | 3.07205434 | 0.45625798 |
| Q02952 | AKAP12 | REQSHAIESPPAESGQAVEECK                    | S248        | 0.04978076 | 1.62921186 | 0.45652016 |
| Q02952 | AKAP12 | RPSESDKEDLDK                              | S627        | 0.07125775 | 1.78130217 | 0.49571338 |
| Q02952 | AKAP12 | ETCVSGEDPTOGADLSPDEK                      | S483        | 0.16841401 | 1.70212945 | 0.56312413 |
| Q02952 | AKAP12 | ETGTDGILAGSQEHDPGQSSSPEQAGSPTEGEGVSTWESFK | S761        | 0.21410563 | 2.14771306 | 0.60145169 |
| Q02952 | AKAP12 | SAESPTSPVTSETGSTFK                        | S283        | 0.29408729 | 0.83953478 | 0.6555018  |
| Q02952 | AKAP12 | EGVTPWASFK                                | S612        | 0.33361338 | 1.15013902 | 0.67622969 |
| Q02952 | AKAP12 | GESSASSPEEPEITCLEK                        | S568        | 0.34046642 | 1.18511867 | 0.67842858 |
| Q02952 | AKAP12 | SAESPTSPVTSETGSTFK                        | S286        | 0.50197292 | 1.13636364 | 0.76563097 |
| Q02952 | AKAP12 | RGGGDDEESGEHTQVPADSPDSQEEQK               | S557        | 0.71958361 | 1.03982017 | 0.88953552 |
| Q02952 | AKAP12 | GLAEVQQDGEAEEGATSDGEK                     | S598        | 0.7870551  | 1.04490378 | 0.92069713 |
| Q02952 | AKAP12 | EVSSLEGSPPCLQGEAEVCTK                     | S1395       | 0.80284047 | 1.03175896 | 0.92467356 |
| Q12802 | AKAP13 | SGSLDSELSVSPK                             | S2728       | 0.06697065 | 0.77870276 | 0.49083932 |
| Q12802 | AKAP13 | DMAECSTPLPEDCSPHSPR                       | T2400,S2398 | 0.11465704 | 0.71042922 | 0.53343618 |
| Q12802 | AKAP13 | LSSSEETESTQCCPGSPAQTESPCDLSSIVEEENTDR     | S345        | 0.20073295 | 1.27685491 | 0.58192278 |
| Q12802 | AKAP13 | SLSPFR                                    | S1559       | 0.22606879 | 0.85944067 | 0.6080317  |
| Q12802 | AKAP13 | SLSRPSLIEQEK                              | S2563       | 0.44784062 | 0.76029793 | 0.73811209 |
| Q12802 | AKAP13 | KGEEVPAPIVDSGTVDQDQSLPDCGVK               | S395        | 0.7582051  | 1.05359967 | 0.90833103 |
| Q12802 | AKAP13 | QSPCECNFLDVGLGR                           | S1411       | 0.81762331 | 0.94586857 | 0.93149014 |
| Q12802 | AKAP13 | GPEGQSQAPASTSASTR                         | S2770       | 0.83527062 | 0.885048   | 0.9396472  |
| Q9Y2D5 | AKAP2  | SPGALETSPAAGSQGNTASQGK                    | S393        | 0.52001077 | 0.89209402 | 0.77620221 |
| Q9Y2D5 | AKAP2  | TLSMIEEIR                                 | S720        | 0.69314877 | 0.87774038 | 0.87196791 |
| Q9Y2D5 | AKAP2  | QVLQSTQSPR                                | S748        | 0.77183391 | 0.94933128 | 0.91329931 |
| Q9Y2D5 | AKAP2  | DALGDSLQVPVSPSSTSSR                       | S152        | 0.91233213 | 1.02670433 | 0.96699909 |
| Q96B36 | AKT1S1 | SSDEENGPPSPDLDR                           | S211        | 0.31061606 | 0.86127168 | 0.66197301 |
| Q96B36 | AKT1S1 | LNTSDFQK                                  | T246        | 0.80087954 | 0.8909224  | 0.92455018 |
| P04075 | ALDOA  | LQSIGTENTEENR                             | S46         | 0.24673295 | 1.50357543 | 0.61377267 |
| P04075 | ALDOA  | GILAADESTGSIK                             | S36         | 0.34097504 | 1.11521695 | 0.67842858 |
| Q92685 | ALG3   | SGSAAQAEGLCK                              | S13         | 0.17621203 | 1.2168344  | 0.56898248 |

|        |          |                                     |             |            |            |            |
|--------|----------|-------------------------------------|-------------|------------|------------|------------|
| Q6P6C2 | ALKBH5   | SYESSEDCSEAAGSPAR                   | S371        | 0.11412975 | 1.41338141 | 0.53343618 |
| Q6P6C2 | ALKBH5   | SYESSEDCSEAAGSPARK                  | S384        | 0.12362086 | 1.38205047 | 0.53975675 |
| Q6P6C2 | ALKBH5   | SYESSEDCSEAAGSPAR                   | S375        | 0.37698554 | 0.79709107 | 0.70397848 |
| Q6P6C2 | ALKBH5   | RGFSFSENYWR                         | S361        | 0.64195843 | 1.10181311 | 0.84611743 |
| Q6P6C2 | ALKBH5   | RGFSFSENYWR                         | S363        | 0.80285757 | 0.96604615 | 0.92467356 |
| Q6P6C2 | ALKBH5   | YQEDSDPERSDYEEQLQK                  | S64,S69     | 0.84543403 | 0.9447983  | 0.94461198 |
| Q6P6C2 | ALKBH5   | YQEDSDPERSDYEEQLQK                  | S64         | 0.94685546 | 0.98727343 | 0.98213577 |
| Q9C0C7 | AMBRA1   | LELSSASPOEER                        | S639        | 0.00204569 | 0.53412757 | 0.27314524 |
| Q9UKV5 | AMFR     | SDSIRPALNSPVERPSSDQEEGETSAQTER      | S522        | 0.01458314 | 0.40430309 | 0.41362115 |
| Q9UKV5 | AMFR     | SDSIRPALNSPVERPSSDQEEGETSAQTER      | S523        | 0.02619936 | 0.42734619 | 0.41830815 |
| Q9UJX6 | ANAPC2   | TDPASLETGQDSEDDSGEPEDWVPDPVDADPGK   | S470        | 0.33722485 | 1.56469832 | 0.67736506 |
| Q9UJX5 | ANAPC4   | EEVLSESEAEHQQAALAPEIVIK             | S777        | 0.03478771 | 2.28884788 | 0.43874459 |
| Q8IWZ3 | ANKHD1   | GGGAGGNSDNDLSDTDCNSESSGGK           | S1593       | 0.34137232 | 0.91419055 | 0.67842858 |
| Q9P2G1 | ANKIB1   | GVAPADSPPEAR                        | S737        | 0.85102573 | 0.94772707 | 0.94652762 |
| O75179 | ANKRD17  | NSPLDCGASPNK                        | S2067       | 0.01539427 | 0.53551575 | 0.41830815 |
| O75179 | ANKRD17  | EHYVPVSSPSPPAQPGGVSR                | S2041,S2047 | 0.06314761 | 0.54550066 | 0.47702638 |
| O75179 | ANKRD17  | EHYVPVSSPSPPAQPGGVSR                | S2045,S2047 | 0.30071039 | 0.76100688 | 0.65817287 |
| Q92625 | ANKS1A   | SPSFASEWDEIEK                       | S663        | 0.15870687 | 1.26785728 | 0.55688781 |
| Q92625 | ANKS1A   | SDSDLTCSPTEDATMGSR                  | S628        | 0.18820332 | 0.59384841 | 0.57474321 |
| Q6ZW76 | ANKS3    | DVTSPINER                           | S320        | 0.72823504 | 1.06719674 | 0.89429861 |
| Q9NQW6 | ANLN     | RCSDNTEVEVSNLENK                    | T75         | 0.00292708 | 0.43410909 | 0.27314524 |
| Q9NQW6 | ANLN     | QPLSEASNQQLSLSGEEEK                 | S54         | 0.02347062 | 0.57222222 | 0.41830815 |
| Q9NQW6 | ANLN     | TQSLPVTEK                           | S485        | 0.08788058 | 0.55082567 | 0.50672665 |
| Q9NQW6 | ANLN     | TPISPLK                             | S323        | 0.1404345  | 0.69083124 | 0.54797298 |
| Q9NQW6 | ANLN     | AESGDSLGSERDRLLYSIDAYR              | S661        | 0.52109558 | 1.42292441 | 0.77620221 |
| Q9H6X2 | ANTXR1   | EVPPPPAESEEEEDDGLPK                 | S362        | 0.47405797 | 1.11272222 | 0.75168308 |
| P04083 | ANXA1    | GGGSAVSPYPTFNPSDDVAALHK             | S37         | 0.57565759 | 1.45330278 | 0.81432655 |
| P07355 | ANXA2    | GLGTDEDSLIEICSR                     | S127        | 0.09117625 | 2.6047759  | 0.51141856 |
| P07355 | ANXA2    | LSLEGDHSTPPSAYGSVK                  | S12         | 0.09157289 | 1.77281889 | 0.51218258 |
| P07355 | ANXA2    | GLGTDEDSLIEICSR                     | T123        | 0.13384737 | 2.65164204 | 0.5475768  |
| P07355 | ANXA2    | LSLEGDHSTPPSAYGSVK                  | S26         | 0.63632292 | 0.78256297 | 0.8285808  |
| O00203 | AP3B1    | NFYESDDQK                           | S276        | 0.96262967 | 1.0062439  | 0.98552217 |
| O14617 | AP3D1    | HRPSEADEELAR                        | S658        | 0.88348753 | 0.954364   | 0.95803874 |
| Q99767 | APBA2    | SASQDCIETTPGAQEGK                   | S478        | 0.02798667 | 0.63246727 | 0.42460836 |
| P25054 | APC      | QASSDSDSLSLK                        | S2129       | 0.22380595 | 0.69992526 | 0.6080317  |
| P25054 | APC      | SKTPTPPQTAAQTK                      | T1438       | 0.82863417 | 0.96457971 | 0.9364171  |
| P13798 | APEH     | ALDVASDDEIAR                        | S187        | 0.38814    | 1.06022538 | 0.71060254 |
| Q9HDC9 | APMAP    | RPLRPQVVTDDDGQAPEAK                 | T19         | 0.12520402 | 0.6947269  | 0.5401424  |
| P10398 | ARAF     | GGSDGTPRGSPSPASVSSGR                | T253,S257   | 0.31185854 | 0.74672867 | 0.66201195 |
| Q8WWN8 | ARAP3    | SLDQPLFK                            | S1444       | 0.19757465 | 1.57927462 | 0.58169594 |
| P84077 | ARF1     | LGLHSLR                             | S147        | 0.23341048 | 0.77873794 | 0.6080317  |
| Q8N6T3 | ARFGAP1  | SPSSDWTCACTSTER                     | S343        | 0.00916566 | 1.80621118 | 0.37254089 |
| Q8NGH7 | ARFGAP2  | HGTDLWIDNMSSAVPNHNSPEK              | S146        | 0.29095324 | 2.00857037 | 0.65205353 |
| Q8NGH7 | ARFGAP2  | AISSDMFFGR                          | S432        | 0.4629333  | 2.21502909 | 0.74438607 |
| Q8NGH7 | ARFGAP2  | DNPFSLGESGSR                        | S368        | 0.94017373 | 1.02612512 | 0.97922223 |
| Q9Y6D6 | ARFGEF1  | SVDIHDSIQPR                         | S1569       | 0.43075636 | 0.86046977 | 0.73034023 |
| Q9Y6D6 | ARFGEF1  | LSVSSNDTQESGNSSGSPGAK               | S394        | 0.70065703 | 0.908655   | 0.87594502 |
| Q9Y6D5 | ARFGEF2  | GQSQLSNPTDDSWK                      | S1528       | 0.22869207 | 0.90166028 | 0.6080317  |
| Q9Y6D5 | ARFGEF2  | GSSLSGTDGGAQEVVK                    | S277        | 0.57714076 | 0.89104243 | 0.81432655 |
| P53367 | ARFIP1   | NSAAEIPVTSNGEVDDSDREHSFNR           | S24         | 0.31119521 | 1.20120606 | 0.6619866  |
| Q07960 | ARHGAP1  | SSPELVTHK                           | S51         | 0.88122503 | 1.02131148 | 0.95761744 |
| Q8IWW6 | ARHGAP12 | TSFSQEQSCDSAGEGSR                   | S201        | 0.03780095 | 0.75370526 | 0.44815912 |
| Q8IWW6 | ARHGAP12 | ATTPPNQGRPDSPPYANLQELK              | T231,S240   | 0.07315455 | 0.77814208 | 0.49843227 |
| Q8IWW6 | ARHGAP12 | IHQDSESGDELSSSTEQR                  | S215        | 0.94890628 | 0.99005356 | 0.98215506 |
| Q68EM7 | ARHGAP17 | AESSSGGTVPSSAGILEQGPSGDPGSPKPK      | S575        | 0.46835963 | 1.33023975 | 0.74815888 |
| Q5T5U3 | ARHGAP21 | KDSSSEVFSDAAK                       | S923        | 0.07159259 | 0.73293769 | 0.49571338 |
| Q5T5U3 | ARHGAP21 | AQPSSSEDELNDVFFK                    | S1431       | 0.10953691 | 1.07969502 | 0.53343618 |
| Q5T5U3 | ARHGAP21 | RNSEGSELSCTEGLTSSLSR                | S1671       | 0.53563689 | 1.14172128 | 0.78666672 |
| Q5T5U3 | ARHGAP21 | LRTSTSDLSR                          | S1862       | 0.57725836 | 0.87222354 | 0.81432655 |
| Q6ZUM4 | ARHGAP27 | SSQDGDTPAAQSPPEEK                   | S466        | 0.08152089 | 0.66150822 | 0.50397847 |
| Q52LW3 | ARHGAP29 | IEEDRCSNSADITGPSFIR                 | S521        | 0.85506092 | 0.95591735 | 0.94852754 |
| A7KAX9 | ARHGAP32 | SEESLTLHAVDGDGSK                    | S706        | 0.65966146 | 0.93702856 | 0.85473065 |
| Q9NRY4 | ARHGAP35 | NSLSDPNIDR                          | S589        | 0.16008449 | 0.57142857 | 0.55746307 |
| Q9NRY4 | ARHGAP35 | AGSPLCSNQLQDSEEDIEPSYSLFR           | S975        | 0.19127992 | 1.33678477 | 0.57584619 |
| Q9NRY4 | ARHGAP35 | TSFSVGSDDDELGPPIR                   | S1179       | 0.43371026 | 1.10084234 | 0.73152094 |
| Q9NRY4 | ARHGAP35 | NEEENIYSPVHDSTQGK                   | Y1105       | 0.69155971 | 1.05458646 | 0.8713243  |
| Q9NRY4 | ARHGAP35 | TSFSVGSDDDELGPPIR                   | S1179       | 0.88888097 | 0.98237886 | 0.95935633 |
| Q13017 | ARHGAP5  | RTHSDASDDEAFTTSK                    | S1173,S1176 | 0.2249547  | 0.54699432 | 0.6080317  |
| Q13017 | ARHGAP5  | HRGSEEDPLLPVETWK                    | S1195       | 0.40190547 | 1.22013946 | 0.7160132  |
| Q13017 | ARHGAP5  | GSEEDPLLPVETWK                      | S1202       | 0.41597352 | 1.08163122 | 0.72383353 |
| Q13017 | ARHGAP5  | HRGSEEDPLLPVETWK                    | S1195,S1202 | 0.59623616 | 0.79407325 | 0.82338978 |
| Q13017 | ARHGAP5  | GGIDNPAITSDQELDDK                   | S1218       | 0.63652293 | 0.85314455 | 0.8428508  |
| Q13017 | ARHGAP5  | GGIDNPAITSDQELDDK                   | S1218       | 0.7768588  | 1.0282729  | 0.91412088 |
| O15085 | ARHGEF11 | HQVLLEDPEQEGSAEEEEELGVLPCPSTSLDGENR | S1155       | 0.1419684  | 2.81221054 | 0.55060716 |
| O15085 | ARHGEF11 | NSHELGPCPEDDSDAPLEDSTADAAAASPGP     | S1519       | 0.23257398 | 0.7312266  | 0.6080317  |
| O15085 | ARHGEF11 | SLGGESSGGTTPVGSFHTEAAR              | S1458       | 0.38031716 | 1.22150319 | 0.70800664 |
| O15085 | ARHGEF11 | SRSDVMDAAAEEATR                     | S635        | 0.44872099 | 1.27417756 | 0.73811209 |
| O15085 | ARHGEF11 | SLGGESSGGTTPVGSFHTEAAR              | T1461,S1458 | 0.60644313 | 0.91110492 | 0.82979346 |
| O15085 | ARHGEF11 | TRNSGIWESPELDR                      | S1295       | 0.66527679 | 0.96       | 0.85781103 |
| Q9NZN5 | ARHGEF12 | TASQGPQTDSDVIQNSENIK                | S1288       | 0.0254831  | 0.422805   | 0.41830815 |
| Q9NZN5 | ARHGEF12 | TDCCSGDASRPSDNDADSPK                | S303        | 0.25500746 | 0.83795144 | 0.6238345  |

|        |          |                                    |           |            |            |            |
|--------|----------|------------------------------------|-----------|------------|------------|------------|
| Q9NZN5 | ARHGEF12 | SETIQDITDQSLVSGPSTR                | S341      | 0.8573536  | 0.94495437 | 0.95015878 |
| Q96PE2 | ARHGEF17 | SLSDPIPQR                          | S735      | 0.04380976 | 1.31464521 | 0.45441331 |
| Q96PE2 | ARHGEF17 | SPSFGAGEGLLR                       | S420      | 0.16510538 | 1.57409064 | 0.562993   |
| Q96PE2 | ARHGEF17 | RPSADSESPGTPSDGAAWEPPAR            | S142      | 0.96640868 | 1.0148336  | 0.98758099 |
| Q6ZSZ5 | ARHGEF18 | RAETFAGYDCTNSPTK                   | S733      | 0.00319165 | 0.56353163 | 0.27314524 |
| Q6ZSZ5 | ARHGEF18 | RAETFAGYDCTNSPTK                   | T731      | 0.01716666 | 0.57670716 | 0.41830815 |
| Q92974 | ARHGEF2  | LQDSSDPDTGSEEEGSSRLSPPHSPR         | S956,S960 | 0.07448881 | 1.60413081 | 0.49918003 |
| Q92974 | ARHGEF2  | LQDSSDPDTGSEEEGSSRLSPPHSPR         | S956      | 0.11565131 | 2.2268365  | 0.53343618 |
| Q96DR7 | ARHGEF26 | AVVSGFDFDSPTSSK                    | S333      | 0.14706927 | 0.39637063 | 0.55352644 |
| Q8N1W1 | ARHGEF28 | AESLPLSSNLQSK                      | S535      | 0.42159943 | 1.22001344 | 0.7256314  |
| Q8TER5 | ARHGEF40 | GSPTDAEGSPGLSR                     | S262      | 0.4522792  | 0.83229123 | 0.73811209 |
| Q15052 | ARHGEF6  | MSGFIYQ GK                         | S488      | 0.06187872 | 0.7534626  | 0.47702638 |
| P29374 | ARID4A   | ILGQSSPEK                          | S864      | 0.54738136 | 0.90039565 | 0.7933521  |
| Q4LE39 | ARID4A   | EDNSEEEEIEPFPPEER                  | S295      | 0.26105503 | 0.55963213 | 0.62872273 |
| Q66PJ3 | ARL6IP4  | ASTAPGAEASPPCITER                  | S178      | 0.02190543 | 1.25650412 | 0.41830815 |
| Q66PJ3 | ARL6IP4  | SAGEEEDGVPVLDEQK                   | S271      | 0.14910327 | 0.81492765 | 0.55352644 |
| P56211 | ARPP19   | YFDSGDYNNMAK                       | S62       | 0.52039774 | 0.92553846 | 0.77620221 |
| P49407 | ARRB1    | EEEEEDGTGSPQLNLR                   | T410      | 0.22761041 | 0.80330178 | 0.6080317  |
| P49407 | ARRB1    | DDKEEEDGTGSPQLNLR                  | S412      | 0.67003856 | 0.9122238  | 0.86045622 |
| Q43150 | ASAP2    | LLHEDLDESDDMDEK                    | S701      | 0.99337688 | 1.00228571 | 0.99772632 |
| Q9NVM9 | ASUN     | DSPDSEPPNK                         | S626      | 0.08231509 | 0.63769515 | 0.50397847 |
| Q8NBU5 | ATAD1    | EYVNSTSESHDEIRPVQQDLHR             | S322      | 0.00945158 | 1.91161643 | 0.37254089 |
| Q6PL18 | ATAD2    | NNSNTCNIENELEDSRK                  | S1243     | 0.00062319 | 0.41663708 | 0.25274253 |
| Q96QE3 | ATAD5    | QFEMENSLDPENEQTVQK                 | S356      | 0.02109019 | 0.49383348 | 0.41830815 |
| P15336 | ATF2     | NDSVIVADQTPPTPR                    | T69,T71   | 0.72757475 | 0.89588627 | 0.89157396 |
| O75143 | ATG13    | THCAATPSSSED TETVNSNSEGR           | S355      | 0.12723787 | 1.5619381  | 0.5403576  |
| Q96BY7 | ATG2B    | LSPSWNPK                           | S255      | 0.41818191 | 0.84820973 | 0.72427252 |
| Q96BY7 | ATG2B    | SSPVCSTAPVETEPK                    | S240      | 0.72288762 | 1.05400095 | 0.89157396 |
| Q96BY7 | ATG2B    | SVSVDESRELIFR                      | S497      | 0.76929545 | 1.14529391 | 0.91329931 |
| Q7Z3C6 | ATG9A    | RESDESSESAPDEGEGGAR                | S735      | 0.1616632  | 1.20045295 | 0.55797736 |
| Q8NHH9 | ATL2     | TSDPSAAVNHVSTTSLGENYEDDDLVSDEVMK   | S24       | 0.10412374 | 2.46563775 | 0.52476522 |
| Q8NHH9 | ATL2     | RTSDPSAAVNHVSTTSLGENYEDDDLVSDEVMK  | S27       | 0.23723048 | 2.22797255 | 0.6080317  |
| Q8NHH9 | ATL2     | RTSDPSAAVNHVSTTSLGENYEDDDLVSDEVMK  | S24       | 0.28109021 | 2.12719947 | 0.6455595  |
| P54259 | ATN1     | SEIESESEETNAPK                     | S77       | 0.17898599 | 0.60800231 | 0.56898248 |
| Q9H7F0 | ATP13A3  | LVHDSLEDLQMTR                      | S817      | 0.22996931 | 0.63103362 | 0.6080317  |
| P16615 | ATP2A2   | EFDELNSAQR                         | S663      | 0.37163284 | 1.11111111 | 0.7012243  |
| P20020 | ATP2B1   | IEDSEPHILDDTAEDDAPTK               | S1193     | 0.76189342 | 0.87600724 | 0.90951853 |
| Q01814 | ATP2B2   | SATSSSPGPIHSLETSL                  | S1242     | 0.15709433 | 0.77083333 | 0.55688781 |
| Q01814 | ATP2B2   | SATSSSPGPIHSLETSL                  | S1234     | 0.25810728 | 1.3819025  | 0.62621067 |
| Q9Y487 | ATP6V0A2 | KDSEEEVSLGSDIEEGNHQVEDGCR          | S695      | 0.04914974 | 2.49035968 | 0.45625798 |
| Q13535 | ATR      | RLSSLSNPK                          | S435      | 0.23660065 | 0.70163046 | 0.6080317  |
| P46100 | ATRX     | EIQSGSSSDAEESSEDNK                 | S1156     | 0.00120503 | 0.34163232 | 0.27314524 |
| P46100 | ATRX     | LTPVLSNSPIK                        | S594,S596 | 0.0302426  | 0.32143477 | 0.4339813  |
| P46100 | ATRX     | ETFSSAEGTVDK                       | S889      | 0.2440531  | 0.76435407 | 0.61377267 |
| P46100 | ATRX     | QSETVDQNSDDEMLAILK                 | S729      | 0.28154192 | 0.71865331 | 0.6455595  |
| P46100 | ATRX     | LTPVLSNSPIK                        | S598      | 0.28999835 | 0.68227717 | 0.65205353 |
| P46100 | ATRX     | RPTETNPVTSNSDEECNETVK              | S677      | 0.32711945 | 0.87904968 | 0.67305029 |
| P46100 | ATRX     | KDELSDYAEK                         | S1061     | 0.70146816 | 0.86801545 | 0.87594502 |
| POC7T5 | ATXN1L   | TVLGSRELCDSEK                      | S615      | 0.72528406 | 0.91451156 | 0.89291515 |
| Q99700 | ATXN2    | RGPEVTSQGVQTSPPACK                 | S889      | 0.06467006 | 0.56209331 | 0.48313162 |
| Q99700 | ATXN2    | GISPVVSEGR                         | S784      | 0.15806964 | 0.5674547  | 0.55688781 |
| Q99700 | ATXN2    | ENIKPNETSPFSK                      | S772      | 0.94717991 | 1.01299104 | 0.98213577 |
| Q99700 | ATXN2    | ENIKPNETSPFSK                      | T771      | 0.95200623 | 0.98727008 | 0.98312128 |
| Q8WWM7 | ATXN2L   | STSTPTSPGPR                        | T683,S680 | 0.15166743 | 0.52281845 | 0.55686437 |
| Q8WWM7 | ATXN2L   | EVDGLTSEPMGSPVSSK                  | S594      | 0.19425328 | 0.73790463 | 0.52262671 |
| Q8WWM7 | ATXN2L   | GPPQSPVFEVYNNR                     | S111      | 0.1987353  | 1.18074478 | 0.58169594 |
| Q8WWM7 | ATXN2L   | EDKPPPLASGGTEGPEQPPPPCPSQTGSPVGLIK | S630      | 0.93305349 | 1.03667999 | 0.97583851 |
| Q14CW9 | ATXN7L3  | LQWDGSDSLSPDSGSSK                  | S281      | 0.26170602 | 0.92836857 | 0.62985013 |
| Q9NQS1 | AVEN     | REPGGWGAGASAPVEDSDAETGEENDEQGNYSK  | S94       | 0.34738365 | 0.80345029 | 0.68170331 |
| Q9UPN4 | AZI1     | RPASLSTAPSEK                       | S114      | 0.34489889 | 0.79133481 | 0.68023038 |
| Q92934 | BAD      | HSSYPAGTDEDEGMGEEPSPFR             | S75       | 0.02513256 | 0.63759105 | 0.41830815 |
| O95817 | BAG3     | SSTPLHSPSPIR                       | T285,S289 | 0.13011881 | 0.51341912 | 0.54344847 |
| O95817 | BAG3     | SQSPAASDCSSSSSASLPSSGR             | S173      | 0.17923225 | 0.66898955 | 0.56898248 |
| O95817 | BAG3     | SSTPLHSPSPIR                       | S289      | 0.8522159  | 1.06657824 | 0.94718309 |
| O95817 | BAG3     | VPPAPVPCPPSPGSAVSPSPK              | S377,S386 | 0.91638981 | 1.04808466 | 0.96930175 |
| P46379 | BAG6     | ASPEPQRENASAPGTTAEAMS              | S964,S973 | 0.03828316 | 0.64218362 | 0.44815912 |
| P46379 | BAG6     | VGDPQPLPEEMPEVQGAERASPEPQR         | S964      | 0.36444241 | 0.83606557 | 0.6961046  |
| P46379 | BAG6     | ASPEPQRENASAPGTTAEAMS              | T978      | 0.49178688 | 1.09519837 | 0.76327806 |
| Q9UQB8 | BAIAP2   | SSSTGNLLDK                         | S454      | 0.10513662 | 0.66898367 | 0.52553052 |
| Q9UHR4 | BAIAP2L1 | TPASTPVSGTPQASPMIER                | T257,S261 | 0.18731995 | 0.72372592 | 0.57474321 |
| Q16611 | BAK1     | MASGQGPSPR                         | S3        | 0.97228288 | 0.98976458 | 0.98966465 |
| Q92560 | BAP1     | GSSPSIRPIQSGQSSSPVEK               | S582,S597 | 0.58857463 | 0.87958849 | 0.82162585 |
| P80723 | BASP1    | SDGAPASDSKPGSSEAAPSSK              | S183      | 0.12990044 | 1.25840683 | 0.54344847 |
| P80723 | BASP1    | ETPAATEAPSTPK                      | T196      | 0.69651824 | 0.96064401 | 0.87420146 |
| Q9NRL2 | BAZ1A    | ELDQDMVTEDEDDPGSHK                 | T731      | 0.08519022 | 0.6813602  | 0.50397847 |
| Q9NRL2 | BAZ1A    | RQSPPEPVTLGR                       | S1413     | 0.59720803 | 0.86205046 | 0.82370222 |
| Q9UIG0 | BAZ1B    | DHTVSGDEDYCPR                      | S947      | 0.07906771 | 0.80810811 | 0.50397847 |
| Q9UIG0 | BAZ1B    | LAEDEGDSEPEAVQQR                   | S1468     | 0.17925261 | 0.86673297 | 0.56898248 |
| Q9UIG0 | BAZ1B    | SLSGSPK                            | S347      | 0.96750811 | 1.01393344 | 0.98758099 |
| Q9UIF9 | BAZ2A    | AGDPGEMPQSPPTGLGQPK                | S1397     | 0.07820995 | 0.65092193 | 0.50397847 |
| Q8WY36 | BBX      | TADGRVSPAGGTLLDDPK                 | S844      | 0.28337913 | 1.22422492 | 0.64836433 |

|        |          |                                  |           |            |            |            |
|--------|----------|----------------------------------|-----------|------------|------------|------------|
| O75815 | BCAR3    | QNSPVTQDGIQESPWQDR               | S83       | 0.14852542 | 0.56307253 | 0.55352644 |
| O75815 | BCAR3    | TGSEPALSPAVVR                    | S375      | 0.44828481 | 0.85155672 | 0.73811209 |
| P12694 | BCKDHA   | IGHHSTSDSSAVRSVDEVNYWDK          | S337,S347 | 0.11984422 | 0.75596361 | 0.53759949 |
| P12694 | BCKDHA   | SVDEVNYWDK                       | S347      | 0.14707608 | 0.54521031 | 0.55352644 |
| Q9H809 | BCL2L12  | LSSDSFAR                         | S242      | 0.13646577 | 0.4171534  | 0.54797298 |
| Q9BXX5 | BCL2L13  | SSPATSLFVELDEEEVK                | S370      | 0.01839996 | 3.11902081 | 0.41830815 |
| Q9BXX5 | BCL2L13  | EESLVEELSPASEK                   | S420      | 0.02921073 | 0.5700134  | 0.43032203 |
| Q9BXX5 | BCL2L13  | SENNSSNSDIHVHEK                  | S303      | 0.04860763 | 0.58037186 | 0.45625798 |
| P20749 | BCL3     | APSPEPAAPR                       | S41       | 0.00132257 | 0.59564197 | 0.27314524 |
| Q9BQE9 | BCL7B    | VDSSTNSSPSPQQSESLSPAHTSDFR       | S120,S122 | 0.02847699 | 0.675551   | 0.42827402 |
| Q9BQE9 | BCL7B    | VDSSTNSSPSPQQSESLSPAHTSDFR       | S122      | 0.14720001 | 0.5680246  | 0.55352644 |
| Q86UU0 | BCL9L    | SPTLSQVHSLVTPSPANLK              | S934,S949 | 0.35533323 | 0.83401318 | 0.68750992 |
| Q9NYF8 | BCLAF1   | GRAEGEWEDQEALDYFSDK              | S385      | 0.14604804 | 2.05538321 | 0.55352644 |
| Q9NYF8 | BCLAF1   | STFREESPLR                       | S531      | 0.19214678 | 1.24054983 | 0.57728191 |
| Q9NYF8 | BCLAF1   | NTPSQSHSIQHSPEK                  | S259,S268 | 0.26509484 | 1.9373843  | 0.63400981 |
| Q9NYF8 | BCLAF1   | YSPSQNSPIHHIPSR                  | S285,S290 | 0.34085222 | 1.68387982 | 0.67842858 |
| Q9NYF8 | BCLAF1   | KAEGEPQEEESPLK                   | S177      | 0.34156539 | 1.25985222 | 0.67842858 |
| Q9NYF8 | BCLAF1   | YSPSQNSPIHHIPSR                  | Y284,S290 | 0.50443938 | 0.90028541 | 0.76766855 |
| Q9NYF8 | BCLAF1   | FNDSEGGDTEETEDYR                 | T402,S397 | 0.52158098 | 1.42297762 | 0.77620221 |
| Q9NYF8 | BCLAF1   | DTFHDPSESIDFNK                   | S198      | 0.54807083 | 0.91451767 | 0.79375775 |
| Q9NYF8 | BCLAF1   | RIDISPSTLR                       | S658      | 0.57377253 | 1.226829   | 0.81432655 |
| Q9NYF8 | BCLAF1   | IDISPSTLR                        | S658      | 0.57601171 | 0.93184634 | 0.81432655 |
| Q9NYF8 | BCLAF1   | AEGEPQEEESPLK                    | S177      | 0.91099192 | 1.02425016 | 0.9669909  |
| Q9NYF8 | BCLAF1   | FNDSEGGDTEETEDYR                 | S397      | 0.99529537 | 0.99935317 | 0.99790313 |
| Q6WZJ9 | BCOR     | KVSGDSHTTAAEVPEDPLK              | S1139     | 0.11156967 | 0.50373008 | 0.53343618 |
| P11274 | BCR      | ASASRQPAPADGADPPPAEPEARPDGEGSPGK | S122      | 0.37239816 | 0.92679739 | 0.7012243  |
| P11274 | BCR      | HQDGLPYIDSSPSPHLSSK              | S459      | 0.79686999 | 1.05569378 | 0.92373279 |
| O15155 | BET1     | SLSIEIGHEVK                      | S50       | 0.02684265 | 1.81293523 | 0.41830815 |
| Q9NYM9 | BET1L    | AQSPGAVEEILDRENK                 | S9        | 0.15415698 | 1.22626071 | 0.55688781 |
| Q9NYM9 | BET1L    | AQSPGAVEEILDR                    | S9        | 0.63597871 | 1.09788212 | 0.8428508  |
| Q9H694 | BICC1    | VLSANHGDPISQITSGSEQTSPK          | S612      | 0.74037214 | 0.91573661 | 0.89994504 |
| Q9H694 | BICC1    | SNSREHLGGSESNDNR                 | S803      | 0.92170798 | 0.98628389 | 0.97154665 |
| Q9H694 | BICC1    | LLSDPELSATESPLADK                | S679      | 0.92495239 | 0.97183886 | 0.97208912 |
| Q8TD16 | BICD2    | SPILLPK                          | S582      | 0.15780527 | 0.64229793 | 0.55688781 |
| O00499 | BIN1     | SPSPPDGSPAATPEIR                 | S298      | 0.02730338 | 1.50029448 | 0.41837587 |
| O00499 | BIN1     | SPSPPDGSPAATPEIR                 | S303      | 0.03973238 | 0.65578444 | 0.44899888 |
| O00499 | BIN1     | SPSPPDGSPAATPEIR                 | S296      | 0.1146166  | 0.7875     | 0.53343618 |
| O00499 | BIN1     | SPSPPDGSPAATPEIR                 | S298,S303 | 0.44992887 | 0.76496775 | 0.73811209 |
| Q9NR09 | BIRC6    | LEGSDDLLEDSDSEEHSR               | S480      | 0.76523616 | 1.04823257 | 0.91129784 |
| Q14692 | BMS1     | AGLSPANCQSDR                     | S552      | 0.92379664 | 0.98972251 | 0.9718589  |
| Q12982 | BNIP2    | KGSITEYTAEEK                     | S114      | 0.68832167 | 1.07698852 | 0.86958941 |
| Q12982 | BNIP2    | GSITEYTAEEK                      | S114      | 0.74025087 | 1.08812647 | 0.89994504 |
| Q8NFC6 | BOD1L1   | SLTVSDDAESSEPER                  | S2964     | 0.10597598 | 1.38957471 | 0.52598269 |
| Q8NFC6 | BOD1L1   | DVTLSPVK                         | S1531     | 0.457571   | 0.8718552  | 0.74096613 |
| Q8NFC6 | BOD1L1   | TQLSPSIK                         | S3019     | 0.48381369 | 0.86513335 | 0.75785402 |
| Q8NFC6 | BOD1L1   | KEQESDEEEEEEEDEPSGATTR           | S2986     | 0.67485668 | 1.04279931 | 0.86131187 |
| Q8NFC6 | BOD1L1   | EQESDEEEEEEEDEPSGATTR            | S2986     | 0.96848927 | 0.98998351 | 0.9882895  |
| Q12830 | BPTF     | SNGELSESAGGK                     | S763      | 0.00463498 | 0.65199002 | 0.31681062 |
| Q12830 | BPTF     | VLDVVSIRSPETK                    | S1297     | 0.17707084 | 0.68600605 | 0.56898248 |
| P15056 | BRAF     | RDSSDDWEIPDGGQITVGQR             | S447      | 0.09829643 | 1.6446319  | 0.5228915  |
| Q7Z569 | BRAP     | ECINAAPDPSK                      | S117      | 0.36525008 | 1.12157895 | 0.69618384 |
| Q6PJG6 | BRAT1    | GSPNTASAEATLPR                   | S742      | 0.13599719 | 0.72045973 | 0.54761068 |
| P38398 | BRCA1    | HQSESQVGLSDK                     | S1336     | 0.03313442 | 0.5549346  | 0.43874459 |
| O95696 | BRD1     | STCGDSEVEEESPGK                  | T804      | 0.17544877 | 1.26078086 | 0.56898248 |
| O60885 | BRD4     | SKPPPTYESEEDK                    | S601      | 0.13344843 | 1.17492998 | 0.5475768  |
| Q9NP11 | BRD7     | EREDSGDAEAHAFK                   | S279      | 0.86179385 | 1.06950841 | 0.95107454 |
| Q9HOE9 | BRD8     | TEASPESMLSPSHGNSPIEDPLEAETQHK    | T576      | 0.56436475 | 1.19354433 | 0.8081797  |
| Q9HOE9 | BRD8     | TEASPESMLSPSHGNSPIEDPLEAETQHK    | S587      | 0.65016168 | 0.85744631 | 0.84963106 |
| Q9HOE9 | BRD8     | TEASPESMLSPSHGNSPIEDPLEAETQHK    | S579,S582 | 0.95351458 | 1.01050611 | 0.98367301 |
| Q92994 | BRF1     | DGSTEDTASSLGGEDTEDEELEAAASHLNK   | T365      | 0.30799158 | 1.17461385 | 0.66139614 |
| Q92994 | BRF1     | GLSSAGGSGSPHREDAQPEHSASAR        | S553      | 0.31810335 | 1.20167091 | 0.66720337 |
| Q9BX63 | BRIP1    | ATPELGSSSENSASSPPR               | S1032     | 0.03985932 | 0.56856106 | 0.44899888 |
| P55201 | BRPF1    | DGQTDSAEESSSQETSK                | S860      | 0.02223802 | 0.82584697 | 0.41830815 |
| P55201 | BRPF1    | RLPALSHSEGEDEDEEEDGK             | S460,S462 | 0.97019905 | 0.98207085 | 0.98915891 |
| Q9NW68 | BSDC1    | KGSSTDISDWEK                     | S387      | 0.035385   | 1.40557609 | 0.43874459 |
| P35613 | BSG      | RKPEDVLDDDDAGSAPLK               | S362      | 0.03556694 | 1.2893401  | 0.43874459 |
| P35613 | BSG      | KPEDVLDDDDAGSAPLK                | S362      | 0.48010023 | 1.23962139 | 0.75569707 |
| A6QL63 | BTBD11   | HNSFDVTNVALVEDSEGLDCAAGQHCSR     | S65       | 0.36063681 | 1.61966014 | 0.692567   |
| Q9BRD0 | BUD13    | HDSPDLAPNVYLSLPR                 | T279      | 0.91120639 | 1.04665131 | 0.9669909  |
| Q13895 | BYSL     | MPQDGSDDDEEWEPTLEK               | S98       | 0.95693817 | 0.98714898 | 0.98388755 |
| Q7L1Q6 | BZW1     | NAEEESESEAEEDG                   | S411      | 0.51837079 | 1.13155531 | 0.77586658 |
| Q7Z589 | C11orf30 | TNSSSSPVVVK                      | S209      | 0.35259461 | 1.12338183 | 0.68451852 |
| Q7Z589 | C11orf30 | ESCSSTVGSLLTTR                   | S1212     | 0.79837344 | 1.03686715 | 0.92423466 |
| O00193 | C11orf58 | SASPDDDLGSNNWEAADLGNEER          | S15       | 0.0344102  | 1.25870647 | 0.43874459 |
| O00193 | C11orf58 | RSASPDDDLGSNNWEAADLGNEER         | S24       | 0.08085955 | 1.47638648 | 0.50397847 |
| O00193 | C11orf58 | SASPDDDLGSNNWEAADLGNEER          | S17       | 0.15614245 | 1.6053443  | 0.55688781 |
| O00193 | C11orf58 | RSASPDDDLGSNNWEAADLGNEER         | S15       | 0.1591108  | 1.84037016 | 0.55688781 |
| O00193 | C11orf58 | EESAEEQLAAEHPDEVEDPK             | S147      | 0.63028965 | 0.71727594 | 0.8403862  |
| Q9BUA3 | C11orf84 | NLDPPPEPPSPDSTETFAAPEVR          | T253      | 0.01356441 | 0.54721882 | 0.4097879  |
| Q9BUA3 | C11orf84 | AESPSPAPPPGLR                    | S308      | 0.01712464 | 0.71138846 | 0.41830815 |
| Q8N5I9 | C12orf45 | IEVLDSPAK                        | S178      | 8.20E-05   | 0.50239295 | 0.094136   |



|        |          |                                          |           |            |            |            |
|--------|----------|------------------------------------------|-----------|------------|------------|------------|
| Q8N5I9 | C12orf45 | ASPCSSPTRDSSGVPVSK                       | S14       | 0.51929146 | 0.74773074 | 0.77589579 |
| Q6ZUT6 | C15orf52 | SPPTQVAISSDSAR                           | S201      | 0.81225625 | 0.94805453 | 0.92840735 |
| Q8IXM2 | C17orf49 | VYEDSGIPLPAESPK                          | S96       | 0.05751208 | 0.48239824 | 0.47702638 |
| Q8IXM2 | C17orf49 | VYEDSGIPLPAESPCK                         | S96       | 0.08262076 | 0.66973684 | 0.50397847 |
| Q9BQA9 | C17orf62 | TFLYK                                    | S84       | 0.51599741 | 1.16567948 | 0.77421589 |
| Q9HAS0 | C17orf75 | ELESSEEGSAAEER                           | S18       | 0.83303501 | 0.97157623 | 0.93848641 |
| Q96B23 | C18orf25 | RDSSEQLASTESDKPTTGR                      | S66       | 0.17269608 | 1.48870057 | 0.56561687 |
| Q9BQ61 | C19orf43 | GGPGSTLSFVVK                             | S114      | 0.27086409 | 0.67378213 | 0.63502787 |
| Q3KP66 | C1orf106 | TSAPATPEIQGR                             | S387      | 0.94140628 | 0.98731524 | 0.97939813 |
| Q9BU76 | C1orf35  | RPAEATSSPTSPERPR                         | S216      | 0.17918687 | 1.26536515 | 0.56898248 |
| Q9BU76 | C1orf35  | RPAEATSSPTSPERPR                         | T215,T219 | 0.41995669 | 1.19352054 | 0.72466666 |
| Q8N6N3 | C1orf52  | LLPEGEETLESDDK                           | S158      | 0.41592964 | 1.1075398  | 0.72383353 |
| Q07021 | C1QB8P   | EVFSQSTGESEWK                            | S213      | 0.11674107 | 0.81804517 | 0.53343618 |
| Q4AC94 | C2CD3    | EGPSCSPGPFPCR                            | S2114     | 0.01814647 | 0.72878185 | 0.41830815 |
| Q4AC94 | C2CD3    | SSFSSSP                                  | S2132     | 0.30669157 | 0.78967349 | 0.66139614 |
| Q86YS7 | C2CD5    | ASPVGDGNFR                               | S852      | 0.02869757 | 0.73448212 | 0.42832144 |
| Q9BVC5 | C2orf49  | SPPLSPVGTTPVK                            | S189      | 0.09182099 | 1.45582199 | 0.51218258 |
| Q9BVC5 | C2orf49  | SPPLSPVGTTPVK                            | S189,S193 | 0.24225777 | 0.64732391 | 0.61278278 |
| Q9H6K1 | C6orf106 | VEGNFNPFASQK                             | S215      | 0.0266122  | 0.28979505 | 0.41830815 |
| Q9BRJ6 | C7orf50  | GEAVLRPLDAEPSPPEEQR                      | S59       | 0.65107365 | 1.05480959 | 0.84999911 |
| Q9BRJ6 | C7orf50  | ELDEEGSDPPLGR                            | S175      | 0.71476424 | 0.97150456 | 0.88594092 |
| Q8NOT1 | C8orf59  | NVFHIASQK                                | S19       | 0.01232872 | 0.32120071 | 0.39919401 |
| Q9BUH6 | C9orf142 | LAAAEETAIVSPR                            | S148      | 0.14187417 | 0.62875198 | 0.55060716 |
| Q9BUH6 | C9orf142 | SPRPAGPQLFLPDPDPQR                       | S152      | 0.58560919 | 1.47744394 | 0.8200322  |
| Q8IXQ3 | C9orf40  | IDAGTMAEPSASPSK                          | S69       | 0.00247244 | 0.41669688 | 0.27314524 |
| Q9NZ63 | C9orf78  | VGDTEKPEPERSPPNR                         | S261      | 0.5855043  | 0.9359879  | 0.8200322  |
| Q9H8G2 | CAAP1    | SVNEILGLAESSPNEPK                        | S312      | 0.12297468 | 1.24600998 | 0.5389189  |
| Q9H8G2 | CAAP1    | STDSSVSGSLQKETK                          | S89       | 0.57278295 | 0.77622655 | 0.81432655 |
| Q9H8G2 | CAAP1    | ILEGDNGMDSMEEEDDGSK                      | S203      | 0.99777947 | 1.00099105 | 0.99864937 |
| P27708 | CAD      | ASDPGLPAEPEK                             | S1859     | 0.18646551 | 0.69991499 | 0.57474321 |
| P27708 | CAD      | IHRASDPGLPAEPEK                          | S1859     | 0.22787973 | 0.84       | 0.6080317  |
| P27708 | CAD      | VLGTSPEAIDSAENR                          | S1038     | 0.82186654 | 0.97118615 | 0.93385297 |
| Q13557 | CAMK2D   | ESTESNTTIEDEDVK                          | T336      | 0.09890407 | 1.28624863 | 0.52403942 |
| Q13557 | CAMK2D   | KPDGVKSTESSNTTIEDEDVK                    | T336,S330 | 0.54368991 | 0.59725905 | 0.79174125 |
| Q13555 | CAMK2G   | GSTESNTTIEDEDLK                          | T382      | 0.44922987 | 1.13046024 | 0.73811209 |
| Q5T5Y3 | CAMSAP1  | SPNSHDSPEWTLR                            | S722      | 0.60670686 | 0.8439148  | 0.82982463 |
| Q08AD1 | CAMSAP2  | SISNEGLTLNNSHVSK                         | S464      | 0.11360437 | 0.68942731 | 0.53343618 |
| Q08AD1 | CAMSAP2  | SPTTIPIDPK                               | S862      | 0.24675478 | 0.6895888  | 0.61377267 |
| P27824 | CANX     | SDAEEDGGTVSQEEEDRKP                      | S564      | 0.12808495 | 1.33742331 | 0.54122341 |
| P27824 | CANX     | AEDEILNRSR                               | S583      | 0.1532532  | 1.21959599 | 0.56888781 |
| P27824 | CANX     | SDAEEDGGTVSQEEEDR                        | S554      | 0.45191332 | 0.65561993 | 0.73811209 |
| P27824 | CANX     | SDAEEDGGTVSQEEEDR                        | S554,S564 | 0.46642945 | 0.76395459 | 0.7471549  |
| P27824 | CANX     | SDAEEDGGTVSQEEEDRKP                      | S554,S564 | 0.62900181 | 0.94992108 | 0.83899389 |
| P27824 | CANX     | SDAEEDGGTVSQEEEDR                        | S564      | 0.8681784  | 1.04246053 | 0.95435889 |
| P27824 | CANX     | QKSDAEEDGGTVSQEEEDR                      | S554,S564 | 0.89574637 | 0.98401755 | 0.96254306 |
| P27824 | CANX     | QKSDAEEDGGTVSQEEEDR                      | S554      | 0.91251145 | 0.98938224 | 0.96699099 |
| P27824 | CANX     | SDAEEDGGTVSQEEEDRKP                      | S554      | 0.95984638 | 1.00643939 | 0.98502328 |
| Q9Y2V2 | CARHSP1  | GNVVPSPLTR                               | S41       | 0.84785449 | 0.93747674 | 0.9353218  |
| O15234 | CASC3    | GGGSCSGSAGGGGSGSLPSQR                    | S45       | 0.0380912  | 0.66667858 | 0.44815912 |
| O15234 | CASC3    | GGGSCSGSAGGGGSGSLPSQR                    | S35       | 0.10053606 | 0.58075124 | 0.52414255 |
| O15234 | CASC3    | YGSPPQRPNWNGER                           | S265      | 0.14539027 | 1.17227723 | 0.55352644 |
| O15234 | CASC3    | LEQTSVRDPSPEADAPVLGSPEK                  | S363,S373 | 0.24682786 | 0.80185084 | 0.61377267 |
| O15234 | CASC3    | STVTGERQSGDGQESTEPVENK                   | S148      | 0.36792131 | 1.10987791 | 0.69890844 |
| O15234 | CASC3    | QSGDGQESTEPVENK                          | S148      | 0.66569993 | 1.19208832 | 0.85803539 |
| O15234 | CASC3    | LEQTSVRDPSPEADAPVLGSPEK                  | S363      | 0.89136216 | 0.96694215 | 0.96998402 |
| Q8WXE0 | CASKIN2  | SQSFAIR                                  | S858      | 0.08076468 | 0.6724342  | 0.50397847 |
| Q8WXE0 | CASKIN2  | SGEQIFTQDVRPEQLLEGK                      | S471      | 0.09943353 | 1.49918159 | 0.52414255 |
| P20810 | CAST     | SESELIDELSEDFRSECK                       | S373      | 0.07450016 | 3.19324731 | 0.49918003 |
| P20810 | CAST     | KPADDQDPIDALSGDLDCSPSTTETSQNTAK          | S655      | 0.18187947 | 0.69731273 | 0.57200583 |
| P51636 | CAV2     | FADSDQDRDPHR                             | S36       | 0.29855479 | 1.176277   | 0.65817287 |
| Q13185 | CBX3     | LTWHSCPEDEAQ                             | S176      | 0.48845524 | 0.92086753 | 0.76050625 |
| P45973 | CBX5     | SNFNSADDIK                               | S92       | 0.0274544  | 0.54652092 | 0.41837587 |
| P45973 | CBX5     | TADSSSEDEEEVVVEK                         | S14       | 0.07195235 | 0.36300373 | 0.49571338 |
| Q9HC52 | CBX8     | RQDSDLVQCQGVTPSSAEATGK                   | S265      | 0.14501624 | 0.70507764 | 0.55352644 |
| Q9HC52 | CBX8     | RQDSDLVQCQGVTPSSAEATGK                   | S256      | 0.22464531 | 0.72563553 | 0.6080317  |
| Q9HC52 | CBX8     | HGSGPPSSGGGLYR                           | S311      | 0.28704088 | 1.05808598 | 0.65007167 |
| Q6P1N0 | CC2D1A   | QNSPVAPTAQPK                             | S455      | 0.00660353 | 0.74302918 | 0.34322215 |
| Q96MW1 | CCDC43   | AALLAQYADVTDDEEADK                       | T139      | 0.06209197 | 1.78524779 | 0.47702638 |
| Q16204 | CCDC6    | LDQPVSAPPSPR                             | S240,S244 | 0.35625088 | 0.75956382 | 0.68810579 |
| Q16204 | CCDC6    | QLSESESLMDDER                            | S323      | 0.95863984 | 0.99317986 | 0.98495096 |
| Q9H6F5 | CCDC86   | QQDLHLESPPRQPEYSPESPR                    | S102,S113 | 0.0908696  | 0.66083151 | 0.51141856 |
| Q9H6F5 | CCDC86   | LQQGAGLESPPQPEPGAASPQR                   | S80,S91   | 0.11829955 | 0.59375    | 0.53608376 |
| Q9H6F5 | CCDC86   | QQDLHLESPPRQPEYSPESPR                    | S102      | 0.20171745 | 0.73879642 | 0.58254318 |
| Q9H6F5 | CCDC86   | LQQGAGLESPPQPEPGAASPQR                   | S91       | 0.21594425 | 0.76767397 | 0.60366234 |
| Q9H6F5 | CCDC86   | AGLGSPPERPK                              | S58       | 0.28914706 | 0.79277108 | 0.65205353 |
| Q9H6F5 | CCDC86   | EELTPGAPQHQLPPVPGSPEPYQPQAGPPEQSPLLELTPR | S160      | 0.42732034 | 1.88329111 | 0.72966058 |
| Q9H6F5 | CCDC86   | ALVEFESNPEETREPSPSPVQR                   | S47       | 0.5122201  | 0.85636856 | 0.77271948 |
| Q9H6F5 | CCDC86   | LGGLRSPESPELTSVSR                        | S18       | 0.68643989 | 1.25584086 | 0.86883461 |
| Q9H6F5 | CCDC86   | QPEYSPESPR                               | S113      | 0.80912083 | 1.02229033 | 0.92670839 |
| Q3V6T2 | CCDC88A  | SDSSEGLQLPHQDSQDSSVGSNSLEDGQTLGK         | S1439     | 0.1498262  | 1.64331541 | 0.55484026 |
| Q9Y3X0 | CCDC9    | EGAASAPETPQPTSPETSPK                     | S386      | 0.16226711 | 1.24773106 | 0.55797736 |

|        |          |                                       |             |            |            |            |
|--------|----------|---------------------------------------|-------------|------------|------------|------------|
| Q9Y3X0 | CCDC9    | EGAASPAPETPQPTSPETSPK                 | S386,S390   | 0.24706767 | 1.2741934  | 0.61392572 |
| Q9Y3X0 | CCDC9    | EGAASPAPETPQPTSPETSPK                 | T389        | 0.40500429 | 1.16005522 | 0.7160132  |
| Q53HC0 | CCDC92   | SLSAPLHPFEFEVYR                       | S211        | 0.07890788 | 1.77573777 | 0.50397847 |
| Q96F63 | CCDC97   | LLQQEEEEEAEEEEEDSDEEDQR               | S257        | 0.84983804 | 0.90989718 | 0.94645687 |
| Q9B5Q5 | CCM2     | GIITDSFGR                             | S384        | 0.77200837 | 0.95943379 | 0.91329931 |
| P51946 | CCNH     | HEEEEWDDDLVLESL                       | T315        | 0.29137932 | 1.98258538 | 0.65205353 |
| Q9UK58 | CCNL1    | SPISINVK                              | S352        | 0.9540929  | 0.99312124 | 0.98367301 |
| O60583 | CCNT2    | QGQSQAASSSVTSPK                       | S480        | 0.04364067 | 0.70843658 | 0.45441331 |
| Q8ND76 | CCNY     | RSASADNLTLP                           | S326        | 0.27081145 | 0.88888889 | 0.63502787 |
| Q8ND76 | CCNY     | SASADNLTLP                            | S326        | 0.30121484 | 0.80597015 | 0.65823853 |
| Q9Y5K6 | CD2AP    | KNSLDEL                               | S582        | 0.07770068 | 1.49200362 | 0.50397847 |
| Q9Y5K6 | CD2AP    | SVDFDSLTVR                            | S458        | 0.30538149 | 1.47088778 | 0.66139614 |
| O95400 | CD2BP2   | GPGQPSSPQLDR                          | S194        | 0.33593165 | 1.18338777 | 0.67736506 |
| O95400 | CD2BP2   | GPGQPSSPQLDR                          | S195        | 0.34126075 | 1.26886985 | 0.67842858 |
| O95400 | CD2BP2   | HSLDSDEEDDDGGSSK                      | S49         | 0.94030238 | 1.0065445  | 0.97922223 |
| O15446 | CD3EAP   | QEQUINTEPLEDTVLSPTK                   | S285        | 0.00204507 | 0.58667229 | 0.27314524 |
| O15446 | CD3EAP   | QQDATVEPETEVVGPPLDDLEPQAAPTSTK        | T421        | 0.03772611 | 0.67297768 | 0.44815912 |
| P16070 | CD44     | SQEMVHLVVK                            | S706        | 0.02554923 | 0.59540816 | 0.41830815 |
| P16070 | CD44     | LVINGNGAVEDR                          | S686        | 0.12271141 | 0.56387736 | 0.5389189  |
| P48960 | CD97     | ALRASESGI                             | S831        | 0.07827919 | 0.51284041 | 0.50397847 |
| Q12834 | CDC20    | EAAGPAPSPMR                           | S41         | 0.23496557 | 0.61487835 | 0.6080317  |
| P30305 | CDC25B   | SVTPPEEQEAEEPK                        | S353        | 0.00379645 | 0.49247662 | 0.28722668 |
| P30305 | CDC25B   | SLCHDEIENLLDSDHR                      | S375        | 0.28602955 | 0.76410299 | 0.65007167 |
| Q8NHZ8 | CDC26    | EDVEVGGSDGEGAIGLSSDPK                 | S42         | 0.70706739 | 1.03507628 | 0.88070166 |
| Q5VT25 | CDC42BPA | REFSGGSYSK                            | S1651       | 0.45964741 | 1.2816224  | 0.7160036  |
| Q9Y5S2 | CDC42BPB | HSTPSNSSNPSGPPSPNSPHR                 | S1690       | 0.35499035 | 1.24538259 | 0.68723258 |
| Q9Y5S2 | CDC42BPB | HSTPSNSSNPSGPPSPNSPHR                 | S1686,S1690 | 0.35794934 | 0.88159204 | 0.68985871 |
| Q00587 | CDC42EP1 | RSDLLSFR                              | S192        | 0.22623401 | 1.45053144 | 0.6080317  |
| Q9UKI2 | CDC42EP3 | ANSTSDSVFTETPSVLK                     | T90         | 0.28545151 | 0.66758212 | 0.64933619 |
| Q9H3Q1 | CDC42EP4 | AGEPDGSELDEQPSSSSK                    | S64         | 0.08090107 | 0.50373544 | 0.50397847 |
| Q99459 | CDC5L    | GGLNTPLHESDFSGVTPQR                   | T385,T396   | 0.11293398 | 0.73529412 | 0.5343618  |
| Q69YH5 | CDCA2    | AGTDSPVSCASVTEER                      | S710        | 0.00821146 | 0.57805898 | 0.35749468 |
| Q96GN5 | CDCA7L   | ASLVSEEEDEEDK                         | S117        | 0.11599346 | 0.50949617 | 0.53343618 |
| Q53HL2 | CDCA8    | IYNISGNGSPADSK                        | S219        | 0.03066201 | 0.51098368 | 0.43445387 |
| P06493 | CDK1     | IGEGTYGVVYK                           | Y15         | 0.04310884 | 0.6019678  | 0.45441331 |
| P06493 | CDK1     | IGEGTYGVVYK                           | Y15,T14     | 0.06340988 | 0.41925859 | 0.47702638 |
| Q9UQ88 | CDK11A   | RGTSPRPPEGGLGYSQLGDDDLK               | T739        | 0.19839374 | 1.45967742 | 0.58169594 |
| Q9UQ88 | CDK11A   | RGTSPRPPEGGLGYSQLGDDDLK               | T739,S740   | 0.2456385  | 0.66867119 | 0.61377267 |
| Q9UQ88 | CDK11A   | GTSPPRPPEGGLGYSQLGDDDLK               | S740        | 1          | 1          | 1          |
| Q9NVV4 | CDK12    | LYNSEERSPTNK                          | T893        | 0.35182853 | 0.69589658 | 0.68418829 |
| Q9NVV4 | CDK12    | GSPVFLPR                              | S423        | 0.64466183 | 0.93304995 | 0.84838187 |
| Q9NVV4 | CDK12    | NSSPAPPQAPGK                          | S1083       | 0.82806385 | 0.98099415 | 0.9364171  |
| Q14004 | CDK13    | IEHAPSPSSGGTLK                        | S525        | 0.10908339 | 1.31980154 | 0.53337143 |
| Q14004 | CDK13    | HSSISPSTLTK                           | S437,S439   | 0.31391779 | 0.8171123  | 0.66321511 |
| Q14004 | CDK13    | GGDVSPSPYSSSWR                        | S383        | 0.61425476 | 0.88568589 | 0.83347439 |
| Q00537 | CDK17    | RASLSIEGF GK                          | S180        | 0.85229976 | 1.05872444 | 0.94718309 |
| Q00537 | CDK17    | RISMEDLNK                             | S137        | 0.93370742 | 0.9918313  | 0.9759297  |
| P38936 | CDKN1A   | SGEQAEQSPGGPQDSQGR                    | S130        | 0.11753335 | 0.62706129 | 0.56542971 |
| Q01850 | CDR2     | SSSETILSLAGSDIVK                      | S309        | 0.00500563 | 2.40436193 | 0.31681062 |
| Q86X02 | CDR2L    | GDDLGAQDQGVSSPAASPGHVVR               | S304,S308   | 0.04861022 | 0.49078393 | 0.45625798 |
| O95674 | CDS2     | VDGETASDESRAESAPLVSADDTPEVLNR         | S37         | 0.08469459 | 1.47593593 | 0.50397847 |
| O95674 | CDS2     | VAHEPVAPPEDKESESEAK                   | S21         | 0.12037448 | 1.33631841 | 0.5377039  |
| O95674 | CDS2     | VDGETASDESRAESAPLVSADDTPEVLNR         | S33         | 0.27988804 | 1.25045045 | 0.6455595  |
| Q9UKY7 | CDV3     | VQAMQISSEKEEDDNEK                     | S107        | 0.15898465 | 1.61684083 | 0.55688781 |
| Q9UKY7 | CDV3     | VQAMQISSEK                            | S107        | 0.80564634 | 0.93263698 | 0.50397772 |
| Q9Y232 | CDYL     | TAVDGFQSESPK                          | S216        | 0.19264565 | 0.65026132 | 0.57728191 |
| Q03701 | CEBPZ    | SQLDDHPESDDEENFIDANDDEDMEK            | S629        | 0.95723459 | 1.00867769 | 0.98388755 |
| Q03188 | CENPC    | TSVSNQWNPSSAQK                        | S177        | 0.01940665 | 0.41417666 | 0.41830815 |
| Q03188 | CENPC    | SEESPVYNSNSVR                         | S538        | 0.90912511 | 1.01394921 | 0.9669909  |
| P49454 | CENPF    | ITETGAVKPTGECSEGEQSPDNTYPPGEDK        | S1822       | 0.11690874 | 0.7903067  | 0.53343618 |
| Q9HC77 | CENPJ    | RASPNLFSEAQYQAPVEK                    | S260        | 0.20982452 | 0.64509652 | 0.59623402 |
| Q96BT3 | CENPT    | AASPESASSTPESLQAR                     | S397        | 0.04120703 | 0.5693212  | 0.45441331 |
| Q5SW79 | CEP170   | LGEASDSELADADK                        | S1112       | 0.04209273 | 0.85078713 | 0.45441331 |
| Q5SW79 | CEP170   | SESLDPDSSMDTLILK                      | S881        | 0.04879743 | 2.60015328 | 0.45625798 |
| Q5SW79 | CEP170   | ERSESLDPDSSMDTLILK                    | S881        | 0.08193737 | 3.60900958 | 0.50397847 |
| Q5SW79 | CEP170   | SSPVNNHSPGQTPTLGQPEAR                 | S1529,S1522 | 0.14561196 | 0.68003731 | 0.55352644 |
| Q9Y4F5 | CEP170B  | SQSFTHSPGDPK                          | S421        | 0.6667268  | 0.9085639  | 0.85839518 |
| Q5VT06 | CEP350   | EIISPPMDCRPPESPVFGASGQEELAK           | S2829,S2839 | 0.27828038 | 0.73995725 | 0.6449513  |
| Q53EZ4 | CEP55    | SPTAALNESLVECPK                       | T430        | 0.18624281 | 0.66321031 | 0.57474321 |
| Q965T8 | CEP89    | TPPPRSPNPSPERPR                       | S40,S44     | 0.33403266 | 1.17231255 | 0.67622969 |
| P41208 | ETN2     | RMSPKPELTEEQK                         | S20         | 0.69066348 | 1.17619454 | 0.8713243  |
| Q9UEE9 | CFDP1    | LDWESFK                               | S250        | 0.66702007 | 1.20664417 | 0.85845184 |
| P23528 | CFL1     | ASGVAVSDGVK                           | S3          | 0.06357582 | 0.64579597 | 0.47702638 |
| Q0VF96 | CGNL1    | RQDSAGPVLGDGAR                        | S283        | 0.03249371 | 0.76152386 | 0.43874459 |
| Q13111 | CHAF1A   | GLLSNHTGSPR                           | S772        | 0.0446989  | 0.63718736 | 0.45441331 |
| Q13111 | CHAF1A   | SPSTYLYLHTPSEDAAIK                    | S777        | 0.23322232 | 0.72681282 | 0.6080317  |
| Q13112 | CHAF1B   | TQDPSSPGTTTTPQAR                      | S429        | 0.04376728 | 0.65809769 | 0.45441331 |
| Q13112 | CHAF1B   | TQDPSSPGTTTTPQAR                      | T432,S429   | 0.04472887 | 0.64549476 | 0.45441331 |
| Q13112 | CHAF1B   | GSSPGPRPVEGTSPASR                     | S409        | 0.21865673 | 0.81612819 | 0.60411977 |
| Q13112 | CHAF1B   | GSSPGPRPVEGTSPASR                     | S410        | 0.4696887  | 0.86862848 | 0.74934719 |
| Q13112 | CHAF1B   | TDTPPSSVPTSVISTPSTEEIQSETPGDAQGSPPELK | S538        | 0.9121032  | 1.02881683 | 0.9669909  |

|        |         |                                     |             |            |            |            |
|--------|---------|-------------------------------------|-------------|------------|------------|------------|
| Q96JM3 | CHAMP1  | AVPPVSPELR                          | S416        | 0.13081265 | 0.66603951 | 0.54344847 |
| Q96JM3 | CHAMP1  | KTSPASLDFPESQK                      | S459        | 0.19861337 | 0.70774117 | 0.58169594 |
| Q96JM3 | CHAMP1  | KPSGSPDLWKLSLSPDQR                  | S445,S452   | 0.23745721 | 0.64110092 | 0.6080317  |
| Q96JM3 | CHAMP1  | TAPTLSPHEHWK                        | S405        | 0.35754502 | 0.7720333  | 0.68946532 |
| Q96JM3 | CHAMP1  | GGSPDLWK                            | S476        | 0.38143791 | 0.91318039 | 0.70884547 |
| Q96JM3 | CHAMP1  | LAPVSPPEQKQAPVSPESVK                | S204,S214   | 0.60577193 | 0.83283133 | 0.82953421 |
| Q96JM3 | CHAMP1  | DNQESSDAELSSSEYIK                   | S627        | 0.66222636 | 0.88906581 | 0.85612147 |
| Q96JM3 | CHAMP1  | KPGPPLSPEIR                         | S427        | 0.84105278 | 1.06382681 | 0.94290531 |
| Q96JM3 | CHAMP1  | KPSGSPDLWK                          | S445        | 0.8849851  | 0.96477931 | 0.95812202 |
| Q9NX63 | CHCHD3  | YSGAYGASVSDDEELK                    | S50         | 0.16085949 | 0.56528793 | 0.55797736 |
| O14646 | CHD1    | SSVSDAPVHITASGEPVPISEEEELDQK        | S1387       | 0.13726759 | 0.51943407 | 0.54797298 |
| O14646 | CHD1    | KSSVSDAPVHITASGEPVPISEEEELDQK       | S1385       | 0.53545947 | 0.83358043 | 0.78666672 |
| O14646 | CHD1    | SSPSILAVQR                          | S90         | 0.5672664  | 0.89495442 | 0.81132287 |
| O14646 | CHD1    | KSSVSDAPVHITASGEPVPISEEEELDQK       | S1396       | 0.67641811 | 0.8253368  | 0.86185127 |
| Q86WJ1 | CHD1L   | GSVLPLGLVEGSK                       | T629        | 0.63644209 | 0.8541514  | 0.8428508  |
| O14647 | CHD2    | SPLDHRSPLEIR                        | S1807       | 0.45826648 | 1.27726814 | 0.74131976 |
| Q12873 | CHD3    | NDMDEPPPLDYSGEDDGK                  | S597        | 0.18874407 | 0.81400271 | 0.57474321 |
| Q12873 | CHD3    | METEADAPSPAPSLGER                   | S1601,S1605 | 0.39738172 | 1.48965692 | 0.7160132  |
| Q12873 | CHD3    | METEADAPSPAPSLGER                   | S1601       | 0.40238224 | 0.87372679 | 0.7160132  |
| Q12873 | CHD3    | KNDMDEPPPLDYSGEDDGK                 | S597        | 0.43996427 | 0.91278319 | 0.73483849 |
| Q14839 | CHD4    | STAPTEAIECTQAPAPASEDEK              | S1602       | 0.1450752  | 0.89972145 | 0.55352644 |
| Q14839 | CHD4    | TPTPSTPGDTQNPNTAPVPPAEDGIK          | T1540,T1542 | 0.40399159 | 1.2473914  | 0.7160132  |
| Q8TD26 | CHD6    | GDNPNSHPEPAPSCEREPSSGDENCAEPSALPAER | S2680       | 0.5369292  | 0.91558231 | 0.78705986 |
| Q9P2D1 | CHD7    | DEIDEFANSPSEDK                      | S1874       | 0.27032196 | 0.54037682 | 0.63502787 |
| Q9HCK8 | CHD8    | TASPLRLRPDAPVEK                     | S1995       | 0.65619421 | 1.16556249 | 0.85263945 |
| Q9HCK8 | CHD8    | SPEETATQVPSLESLLK                   | S2008       | 0.86635741 | 0.95991522 | 0.9535746  |
| Q9UQN3 | CHMP2B  | ATISDEEIER                          | S199        | 0.63823595 | 1.05728314 | 0.84338453 |
| Q9Y3E7 | CHMP3   | VTDALPEPEPFGMAASEDEEEEEALEAMQSR     | S200        | 0.41450066 | 1.85767028 | 0.7228052  |
| Q8WUX9 | CHMP7   | ISDAELEAELEK                        | S417        | 0.869823   | 0.97002402 | 0.95464321 |
| Q9NRG0 | CHRA1   | REEDENDNDNESDHDEADS                 | S124        | 0.80023332 | 0.97608025 | 0.92455018 |
| Q8WVB6 | CHTF18  | GDAASSPAPAAASVGSQQGAR               | S64         | 0.03453378 | 0.68337023 | 0.43874459 |
| Q96RK0 | CIC     | TQSLSALPK                           | S173        | 0.11100052 | 0.63177142 | 0.53343618 |
| Q86X95 | CIR1    | NLTANDPSQEVASEGEEDPEVEFLK           | S202        | 0.2035605  | 1.51754386 | 0.5847059  |
| Q7Z460 | CLASP1  | NSSNTSVGSPSNTIGR                    | S1091       | 0.08544762 | 0.66440605 | 0.50397847 |
| Q7Z460 | CLASP1  | RQSSGSATNVASTPDNR                   | S646,S647   | 0.29817067 | 0.62439181 | 0.62817287 |
| Q7Z460 | CLASP1  | RQSSGSATNVASTPDNR                   | S647        | 0.41861168 | 0.88496522 | 0.72427252 |
| Q7Z460 | CLASP1  | SRSDIDVNAASAK                       | S600        | 0.42622028 | 0.88368794 | 0.72966058 |
| Q7Z460 | CLASP1  | RQSSGSATNVASTPDNR                   | S646        | 0.49869052 | 0.89731917 | 0.76446134 |
| O75122 | CLASP2  | SSSSQESLNRPFSSK                     | S327        | 0.25983061 | 0.9134618  | 0.62708943 |
| O75122 | CLASP2  | SRSDIDVNAAGAK                       | S370        | 0.69083048 | 1.06603442 | 0.87132443 |
| O75122 | CLASP2  | SFDDDEESVDGNNRPSAASAFK              | S8          | 0.89698239 | 1.02961157 | 0.96293924 |
| O75122 | CLASP2  | SRSDIDVNAAGAK                       | S368        | 0.93269491 | 1.01624109 | 0.97583851 |
| Q8N2M8 | CLASRP  | KISPPSYAR                           | S285        | 0.02514536 | 1.41339671 | 0.41830815 |
| Q14677 | CLINT1  | ASPDQNASTHTPQSSVK                   | T308        | 0.05824063 | 2.09609938 | 0.47702638 |
| Q14677 | CLINT1  | ASPDQNASTHTPQSSVK                   | S299        | 0.13490903 | 0.83036103 | 0.5475768  |
| Q14677 | CLINT1  | ASPDQNASTHTPQSSVK                   | S312        | 0.21882332 | 2.11930691 | 0.60411977 |
| Q14677 | CLINT1  | ASPDQNASTHTPQSSVK                   | T306,S311   | 0.57378584 | 1.36429725 | 0.81432655 |
| P30622 | CLIP1   | VQAEDEANGLQTTASR                    | S143        | 0.05720754 | 0.37407553 | 0.41702638 |
| P30622 | CLIP1   | TASESISNLSEAGSIK                    | S200,S204   | 0.41822601 | 0.70288403 | 0.72427252 |
| P30622 | CLIP1   | TASESISNLSEAGSIK                    | S204        | 0.44410612 | 1.26759565 | 0.73811209 |
| P30622 | CLIP1   | TASESISNLSEAGSIK                    | S195        | 0.4864923  | 0.76272896 | 0.75953527 |
| P30622 | CLIP1   | TASESISNLSEAGSIK                    | S200        | 0.56078435 | 0.85708795 | 0.80506098 |
| Q9UDT6 | CLIP2   | TGNESGSNLSDSGSVK                    | S207        | 0.61787943 | 1.0624141  | 0.83417356 |
| Q8N3C7 | CLIP4   | SWSSTPTAGGIEGSVK                    | S609        | 0.09601879 | 0.56442367 | 0.51670111 |
| P49759 | CLK1    | SVEDDEEGHLICQSGDVLRSAR              | S140        | 0.82828579 | 0.96286227 | 0.9364171  |
| P49761 | CLK3    | YRSPPEPPLYLYR                       | S157        | 0.9725017  | 0.99000193 | 0.98966465 |
| Q96JQ2 | CLMN    | SSESDHFSYVQLR                       | S921        | 0.4383405  | 1.20770299 | 0.7335494  |
| Q96JQ2 | CLMN    | HEPHQDGSQEEAEGCPSAPEPTPVDK          | S635        | 0.47645369 | 1.07191781 | 0.75305485 |
| Q13286 | CLN3    | RFSDSEGEETVPEPR                     | S12         | 0.38625182 | 0.78022758 | 0.71060254 |
| P54105 | CLNS1A  | EPVADEEEEDSDDVPEPTEFR               | S102        | 0.80862044 | 1.10891089 | 0.92670839 |
| P54105 | CLNS1A  | FEESKEPVADEEEEDSDDVPEPTEFR          | S102        | 0.8853199  | 0.91807153 | 0.95812202 |
| Q9HAW4 | CLSPN   | SPSPGLFR                            | S810        | 0.00214805 | 0.42415374 | 0.27314524 |
| Q9HAW4 | CLSPN   | FTSQDASTPASSELNK                    | S950        | 0.04101877 | 0.36343847 | 0.45441331 |
| O75153 | CLUH    | SEDPGQEAEGSEEGSSASGLAK              | S664        | 0.27310319 | 0.77985378 | 0.63888342 |
| Q8WXI2 | CNKS2   | LGDSLQDLYR                          | S908        | 0.30224492 | 0.80700405 | 0.65923465 |
| Q6P4Q7 | CNNM4   | SASLSYVDR                           | S664        | 0.27491053 | 0.76018342 | 0.64019666 |
| Q9NZN8 | CNOT2   | TNSMSSSGLGSPNR                      | S165        | 0.00757192 | 0.62696849 | 0.35749468 |
| Q9COA0 | CNTNAP4 | LISISGK                             | S522        | 0.54167982 | 0.87224872 | 0.79082038 |
| Q535F7 | COBLL1  | DQTASAPATPLVKN                      | S294        | 0.41080354 | 0.83816739 | 0.7189062  |
| P38432 | COIL    | AFQLEEGEETEPDCK                     | T122        | 0.048289   | 0.49171353 | 0.45625798 |
| P53621 | COPA    | NLSPGAVESDVR                        | S173        | 0.19712432 | 1.08213922 | 0.58169594 |
| P35606 | COPB2   | STAQQELDGKSPASPTPVIVASHTANK         | S859        | 0.41604106 | 1.72167382 | 0.72383353 |
| Q8N684 | CPSF7   | SSSTEP PPPVR                        | S48         | 0.21724793 | 0.85563612 | 0.60411977 |
| Q8N684 | CPSF7   | DSSDSADGRATPSENLPSSAR               | T203        | 0.34261682 | 1.2322455  | 0.67878924 |
| P52943 | CRIP2   | ASSVTTFTFGEPTCPR                    | S114        | 0.70819625 | 0.80445288 | 0.84178883 |
| P46108 | CRK     | DSSTSPGDYVLSVSENSR                  | T42         | 0.2082564  | 1.12958627 | 0.59226675 |
| P46108 | CRK     | DSSTSPGDYVLSVSENSR                  | S41         | 0.90494125 | 0.98269655 | 0.96639307 |
| P21291 | CSRP1   | GFGFGQAGALVHSE                      | S192        | 0.98540791 | 1.00646199 | 0.9949188  |
| O15320 | CTAGE5  | SNSELEDEILCLEK                      | S139        | 0.01875645 | 1.61176582 | 0.41830815 |
| O15320 | CTAGE5  | SFNMPSLDK                           | S647        | 0.08798564 | 1.76853083 | 0.50672665 |
| O15320 | CTAGE5  | LNRNSSELEDEILCLEK                   | S137        | 0.15749526 | 1.65350648 | 0.55688781 |

|        |           |                                   |                |            |            |            |
|--------|-----------|-----------------------------------|----------------|------------|------------|------------|
| P35221 | CTNNA1    | SRTSVQTEDDQLIAGQSAR               | T654,S655      | 0.0394336  | 0.29864718 | 0.44899888 |
| P35221 | CTNNA1    | SRTSVQTEDDQLIAGQSAR               | S652,S655      | 0.06828536 | 0.32965293 | 0.49083932 |
| P35221 | CTNNA1    | TSVQTEDDQLIAGQSAR                 | S655           | 0.0883537  | 0.42457152 | 0.50799688 |
| P35221 | CTNNA1    | SRTSVQTEDDQLIAGQSAR               | T658           | 0.17277263 | 0.6910802  | 0.56561687 |
| P35221 | CTNNA1    | TPEELDDSFETEDFDVVR                | S641           | 0.38504525 | 1.48989048 | 0.71060254 |
| P35222 | CTNNB1    | TSMGGTQQQFVGVGR                   | T551           | 0.28802054 | 0.65445424 | 0.65115864 |
| Q8WYA6 | CTNNBL1   | EYAENIGDGRSPEFR                   | S545           | 0.62128199 | 1.12821238 | 0.83613383 |
| O60716 | CTNND1    | TLDRSGDLGDMPELK                   | S920           | 0.04667173 | 0.57934022 | 0.45625798 |
| O60716 | CTNND1    | HYEDGYPGGSDNYGSLSR                | S230           | 0.20693939 | 0.83972644 | 0.59145167 |
| O60716 | CTNND1    | VGGSSVDLHR                        | S268           | 0.24643271 | 0.64624989 | 0.61377267 |
| O60716 | CTNND1    | GSLASLDSLRK                       | S349           | 0.25837554 | 1.4068062  | 0.62621067 |
| O60716 | CTNND1    | VGGSSVDLHR                        | S269           | 0.26620698 | 1.24434389 | 0.63403655 |
| O60716 | CTNND1    | SQSSSHYDDSTLPLIDR                 | S861           | 0.62191955 | 0.82429692 | 0.83613383 |
| O60716 | CTNND1    | GSLASLDSLRK                       | S352           | 0.72197497 | 0.88119993 | 0.89153166 |
| O60716 | CTNND1    | SQSSSHYDDSTLPLIDR                 | Y865,S864      | 0.86507374 | 0.95609289 | 0.95305732 |
| O60716 | CTNND1    | GSLASLDSLR                        | S349           | 0.88224943 | 1.06707019 | 0.95761744 |
| P17812 | CTPS1     | DTYSDRSGSSSPDSEITELK              | Y567,S574      | 0.30417333 | 1.26480756 | 0.6612054  |
| P17812 | CTPS1     | SGSSSPDSEITELK                    | S575           | 0.33769911 | 1.21530612 | 0.67736506 |
| P17812 | CTPS1     | SGSSSPDSEITELK                    | S574,S575      | 0.45051403 | 1.46012898 | 0.73811209 |
| Q9NRF8 | CTPS2     | LSSSDRYSADSDSFSEPR                | Y567,S571      | 0.83357431 | 1.04091661 | 0.93848641 |
| Q6PD62 | CTR9      | GGGFDEFVNDTDDDLPIISK              | T925           | 0.19681807 | 1.61202051 | 0.62621067 |
| Q6PD62 | CTR9      | KGGFDEFVNDTDDDLPIISK              | T925           | 0.56127218 | 1.23563218 | 0.80509013 |
| Q6PD62 | CTR9      | GEEGSDDEETENGPKPK                 | S970           | 0.91938724 | 0.95898039 | 0.97068833 |
| Q14247 | CTTN      | TQTTPPVSPAPQTEERLPSSPVYEDAASFK    | S418           | 0.31830799 | 2.64528003 | 0.66722624 |
| Q14247 | CTTN      | TQTTPPVSPAPQTEER                  | T401,S405      | 0.38243778 | 0.7902709  | 0.70884547 |
| Q14247 | CTTN      | TQTTPPVSPAPQTEERLPSSPVYEDAASFK    | Y421,T401      | 0.43690535 | 1.26072686 | 0.73338954 |
| Q14247 | CTTN      | TQTTPPVSPAPQTEER                  | T399,S405      | 0.54396908 | 0.83313886 | 0.79181298 |
| Q14247 | CTTN      | TQTTPPVSPAPQTEER                  | T401           | 0.59626426 | 1.11484018 | 0.82338978 |
| Q14247 | CTTN      | TQTTPPVSPAPQTEERLPSSPVYEDAASFK    | T401,S405      | 0.66358793 | 1.24634573 | 0.85711256 |
| Q14247 | CTTN      | TQTTPPVSPAPQTEERLPSSPVYEDAASFK    | Y421,T401,S405 | 0.76502845 | 1.12720226 | 0.91129784 |
| Q14247 | CTTN      | LPSSPVYEDAASFK                    | S418           | 0.77353578 | 0.93267974 | 0.91388621 |
| Q14247 | CTTN      | LPSSPVYEDAASFK                    | S417           | 0.93506954 | 0.9733181  | 0.97652346 |
| Q14247 | CTTN      | LPSSPVYEDAASFK                    | S426           | 0.98097429 | 0.99609105 | 0.99337708 |
| Q9P2B4 | CTTNBP2NL | FQSQADQQQASGLQSPPSR               | S481           | 0.38693995 | 0.69957084 | 0.71060254 |
| Q9P2B4 | CTTNBP2NL | DLSPTLIDNSAAK                     | S488           | 0.6197403  | 0.88582832 | 0.88506597 |
| Q13620 | CUL4B     | SATDGNSTTTPPTSAK                  | T49            | 0.07896398 | 0.71184098 | 0.50397847 |
| P39880 | CUX1      | HSSVSDSQCEPPSVGTEYSQGASPPQHQLK    | S1215,S1237    | 0.00716812 | 0.64308272 | 0.3526715  |
| P39880 | CUX1      | AASREEPIWEF                       | S1496          | 0.93357816 | 0.97409413 | 0.9759297  |
| A2AJT9 | CXorf23   | HRSLSPVPR                         | S15,S17        | 0.80124776 | 0.9279949  | 0.92455018 |
| Q8TB03 | CXorf38   | LDSQEPGRQTPDR                     | T314           | 0.50697508 | 0.92571429 | 0.76766855 |
| Q9P0U4 | CXXC1     | SENGENAPIYCICR                    | S19            | 0.39403713 | 0.76314203 | 0.71386843 |
| Q5VWQ8 | DAB2IP    | QGSPSPVSPNALDR                    | S995           | 0.03119068 | 0.66307424 | 0.43845189 |
| Q9UIK4 | DAPK2     | NCESDTEEDIAR                      | S349           | 0.12881964 | 0.67244436 | 0.54214506 |
| Q9UER7 | DAXX      | DGDKSPMSSLQISNEK                  | S495           | 0.07181632 | 0.5763575  | 0.49571338 |
| Q9UER7 | DAXX      | SPMSSLQISNEK                      | S495           | 0.08130522 | 0.5654349  | 0.50397847 |
| Q16643 | DBN1      | MAPTPIPTRSPDSSTASTPVAEQIER        | S337           | 0.54756038 | 1.61353535 | 0.7933521  |
| Q16643 | DBN1      | SPDSSTASTPVAEQIER                 | S337           | 0.73999972 | 0.94412331 | 0.89994504 |
| Q16643 | DBN1      | LSPVLHR                           | S142           | 0.93021894 | 1.01445578 | 0.97583851 |
| Q9UJU6 | DBNL      | AMSTTSISSPPQPK                    | S275           | 0.07082176 | 0.62858531 | 0.49571338 |
| Q9UJU6 | DBNL      | AMSTTSISSPPQPK                    | T270           | 0.93825365 | 0.95501707 | 0.97898999 |
| Q5TAQ9 | DCAF8     | VHDRSEEEEEEEEEEQPR                | S99            | 0.74144571 | 0.91058906 | 0.90061831 |
| Q96PD2 | DCBLD2    | YSSSEVNHLSPR                      | Y597           | 0.15175278 | 0.42364829 | 0.55686437 |
| Q96PD2 | DCBLD2    | TDSCSSAAQAYDTPK                   | T722           | 0.15878437 | 0.67376491 | 0.55688781 |
| Q96SD1 | DCLRE1C   | RNDEITDESLENFPSTVAGGSQSPK         | S518           | 0.25504035 | 0.68530881 | 0.6238345  |
| Q9NPI6 | DCP1A     | ASSPSPLTIGTPESQR                  | S525           | 0.78855904 | 0.92011827 | 0.92123384 |
| Q8IZD4 | DCP1B     | SLSYEPR                           | S275           | 0.51640032 | 1.09791459 | 0.77426326 |
| Q9H773 | DCTPP1    | TDGEPGPQGWSPR                     | S85            | 0.73582312 | 0.94801335 | 0.8976557  |
| Q9H773 | DCTPP1    | YTELPHGAISEDQAVGPADIPCDSTGQTST    | S169           | 0.79201837 | 0.94795065 | 0.9228136  |
| Q9BTE7 | DCUN1D5   | SPGVAAVAEDGGLK                    | S9             | 0.8864944  | 1.0336214  | 0.95863404 |
| Q92466 | DDB2      | SPLLEPEAK                         | S26            | 0.20108199 | 0.77835498 | 0.58195492 |
| Q92466 | DDB2      | SRSPLLEPEAK                       | S24            | 0.91804978 | 0.97503782 | 0.96986608 |
| Q92466 | DDB2      | SRSPLLEPEAK                       | S26            | 0.92141754 | 0.97640449 | 0.97154665 |
| Q92499 | DDX1      | DNTRPGANSPEMWSAIAK                | S481           | 0.11298706 | 0.70344675 | 0.53343618 |
| Q13206 | DDX10     | TANSPGSGARPDVPR                   | S7             | 0.15990067 | 0.7890636  | 0.55746307 |
| Q13206 | DDX10     | QDNDTGNEEQEEEDDEEEMEEK            | T577           | 0.20014843 | 0.77079093 | 0.58169594 |
| Q13206 | DDX10     | SNSEVEDVGPTSHNR                   | S829           | 0.21153857 | 0.74763071 | 0.59863503 |
| Q13206 | DDX10     | SNSEVEDVGPTSHNR                   | S831           | 0.21869197 | 0.72548122 | 0.60411977 |
| Q13206 | DDX10     | RSNSEVEDVGPTSHNR                  | S831           | 0.2544554  | 0.85881295 | 0.62373267 |
| Q92841 | DDX17     | SSQSSSQFSGIGR                     | S674           | 0.09594942 | 0.5228675  | 0.51670111 |
| Q9UHI6 | DDX20     | SYLEGSSDNQLK                      | S678           | 0.1829077  | 0.76723961 | 0.57200583 |
| Q9NR30 | DDX21     | NGFPHPEPCNPSAAESEESNSEIEQEIPIVEQK | S173           | 0.13833128 | 0.73201325 | 0.54797298 |
| Q9NR30 | DDX21     | SDAGLESDTAMK                      | T15            | 0.14501416 | 0.65054084 | 0.55352644 |
| Q9NR30 | DDX21     | EEPSQNDISPK                       | S89            | 0.16589776 | 0.8739726  | 0.56312413 |
| Q9NR30 | DDX21     | NGFPHPEPCNPSAAESEESNSEIEQEIPIVEQK | S171           | 0.2000307  | 0.8245328  | 0.58169594 |
| Q9NR30 | DDX21     | KEEPSQNDISPK                      | S89            | 0.21987395 | 0.86905263 | 0.60482898 |
| Q9NR30 | DDX21     | NEEPSEEDDAPKPK                    | S121           | 0.89027533 | 1.02412605 | 0.95998402 |
| Q9GZR7 | DDX24     | AQAVSEEEEEEGK                     | S82            | 0.59570369 | 0.9221968  | 0.82338978 |
| O00571 | DDX3X     | DAYSSFGSR                         | S71            | 0.15964758 | 1.37103411 | 0.55746307 |
| O00571 | DDX3X     | FSGGFGAR                          | S594           | 0.23551028 | 0.70888954 | 0.6080317  |
| O00571 | DDX3X     | SSFFSDRGSISR                      | S90            | 0.72955951 | 1.10844212 | 0.89480162 |
| O00571 | DDX3X     | SSFFSDRGSISR                      | S92            | 0.91252045 | 1.02961433 | 0.9669909  |

|        |         |                                          |                |            |            |            |
|--------|---------|------------------------------------------|----------------|------------|------------|------------|
| Q9UJV9 | DDX41   | TDEVPAGGSRSEAEDEDEDVYPVPLR               | S23            | 0.06489785 | 1.24968632 | 0.48378395 |
| Q9UJV9 | DDX41   | GAAAAEQDQSGSEPR                          | S66            | 0.2192653  | 0.63783077 | 0.60411977 |
| Q9UJV9 | DDX41   | GAAAAEQDQSGSEPRGDEDDIPLGPQSNVSLLDQHQLK   | S68            | 0.35285344 | 1.25448718 | 0.68463507 |
| Q86XP3 | DDX42   | YMAENPTAGVVQEEEEEDNLEYSDGNPIAPT          | Y183           | 0.42386789 | 1.64033398 | 0.72757489 |
| P17844 | DDX5    | GYSSLLK                                  | S520           | 0.14869615 | 0.52120376 | 0.55352644 |
| Q9BQ39 | DDX50   | SETRENGVTDDLDAK                          | T47            | 0.66727976 | 0.91619402 | 0.85846526 |
| Q8N8A6 | DDX51   | ADGEDAGAESNEEAPGEPGAGSSEEPGEPGAGSSEEPGER | S103           | 0.08068082 | 0.7372549  | 0.50397847 |
| Q8N8A6 | DDX51   | RVNDAEPGSPAPQK                           | S83            | 0.19935205 | 0.87252844 | 0.58169594 |
| Q8N8A6 | DDX51   | VNDAEPGSPAPQK                            | S83            | 0.79084169 | 0.98109793 | 0.92210365 |
| Q8TDD1 | DDX54   | IDDRSDDEEGASDR                           | S782           | 0.62861096 | 1.04132901 | 0.83899389 |
| Q8TDD1 | DDX54   | LGPGRPLPTFTSECTSDVEPDTR                  | S75            | 0.98751288 | 1.00818536 | 0.99494412 |
| Q8NHQ9 | DDX55   | REEGSDIEDEDMELLNDTR                      | S544           | 0.15633826 | 1.5316688  | 0.55688781 |
| Q8NHQ9 | DDX55   | EEGSDIEDEDMELLNDTR                       | S544           | 0.51587859 | 1.29464965 | 0.77421589 |
| P35659 | DEK     | SLIVEGK                                  | S51            | 0.29959927 | 0.79161013 | 0.65817287 |
| P35659 | DEK     | EESEEEDEDEEEEEEEK                        | S32            | 0.39056797 | 0.71413083 | 0.71132527 |
| P35659 | DEK     | EPMPGPRESEEEEEDEEEEEEEK                  | S32            | 0.48732415 | 1.36245955 | 0.75953527 |
| Q5VZ89 | DENND4C | SCSFSSER                                 | S810           | 0.05616487 | 1.48822653 | 0.47702638 |
| Q5VZ89 | DENND4C | THSFENVCSLHPSDR                          | S863           | 0.1430131  | 1.52806122 | 0.55222534 |
| Q5VZ89 | DENND4C | HSQSPPEHSPTEPPAWGSSIVK                   | S732,S737      | 0.2426933  | 0.80750819 | 0.61278278 |
| Q5VZ89 | DENND4C | RSSLPLDHGSPAQENPESEK                     | S1042          | 0.32290525 | 1.14176245 | 0.6705262  |
| Q5VZ89 | DENND4C | RSSLYGIK                                 | S948           | 0.3465787  | 1.14479359 | 0.68145427 |
| O43583 | DENR    | QEAGISEGQGTAGEEEEEK                      | T86            | 0.94485828 | 0.98699984 | 0.98162652 |
| Q8WYQ5 | DGCR8   | YGGDSDHPSDGETSVQPMMTK                    | Y267,S271      | 0.41870691 | 0.71867044 | 0.72427252 |
| O60231 | DHX16   | QQTEKPESEDEWER                           | S160           | 0.98836343 | 0.99755651 | 0.99500837 |
| Q6P158 | DHX57   | DLQEQADADGSEK                            | S127           | 0.02252678 | 0.76592636 | 0.41830815 |
| Q6P158 | DHX57   | GLSGEEEDDEPDCNDR                         | S132           | 0.65199182 | 0.9346211  | 0.8505262  |
| Q14562 | DHX8    | QSMDSMPIK                                | S460           | 0.27849375 | 0.78198876 | 0.64501175 |
| Q9BTC0 | DIDO1   | SPPPEGDTLLFLSR                           | S1040          | 0.20628814 | 0.57944975 | 0.59057054 |
| Q9BTC0 | DIDO1   | HDSSAPDPAPSDADEVMPPEAVPEVASEPGLSASHPNVDR | S890           | 0.77463776 | 1.04875406 | 0.91412088 |
| Q9BTC0 | DIDO1   | RNSVERPAEPVAGAATPSLVEQQK                 | S1456          | 0.99660054 | 0.99724878 | 0.99863027 |
| Q9P265 | DIP2B   | YRSDIHTEAVQAALAK                         | Y98            | 0.43690078 | 1.58249242 | 0.73338954 |
| Q8IYB7 | DIS3L2  | ETEAAYESDIPEELCGHHLPPQQLK                | S139           | 0.82734177 | 0.90708978 | 0.9364171  |
| O60832 | DKC1    | AGLESAGPEGDGSDTTK                        | S494           | 0.20819139 | 1.38772664 | 0.59226675 |
| O60832 | DKC1    | AGLESAGPEGDGSDTTK                        | S494           | 0.30957334 | 1.61865075 | 0.66139614 |
| Q8TDM6 | DLG5    | VGPCSPPAAR                               | S1209          | 0.75557884 | 0.96166137 | 0.90833103 |
| Q8TDM6 | DLG5    | CVPASGELSPQLQEWAPYSPGHSSR                | Y1155,S1146    | 0.76836359 | 0.95712533 | 0.91329931 |
| Q8TDM6 | DLG5    | LGSSSNLQFK                               | S1263          | 0.8205118  | 0.9575186  | 0.93321117 |
| Q9Y2H0 | DLGAP4  | ANSWQLVETPEK                             | T915           | 0.13791092 | 0.71887909 | 0.54797298 |
| Q9Y2H0 | DLGAP4  | QNSATESADSIIEIYVPEAQTR                   | S977           | 0.16803451 | 1.4975566  | 0.56312413 |
| Q9Y2H0 | DLGAP4  | QNSATESADSIIEIYVPEAQTR                   | S973           | 0.3868179  | 1.33087921 | 0.71060254 |
| Q15398 | DLGAP5  | SSIEDAQCPLDPLIEENHVVNK                   | S690           | 0.27367351 | 0.8513208  | 0.63888342 |
| Q9NPF5 | DMAP1   | DTIIDVVGAPLTPNSR                         | T445           | 0.7697223  | 1.12994589 | 0.91329931 |
| Q9Y485 | DMXL1   | LSEAVWQPEEHYSSPEK                        | S918           | 0.60970248 | 0.9507086  | 0.83062316 |
| P31689 | DNAJA1  | VNFPENGFLSPDK                            | S335           | 0.0224104  | 0.42736126 | 0.41830815 |
| O75190 | DNAJB6  | HAPHCLSEEGEQDRPR                         | S277           | 0.44150065 | 0.80857605 | 0.58103091 |
| Q96KC8 | DNAJC1  | EDAEGVAEEEEQEGDSGEQETGATDARPR            | S430           | 0.08599626 | 0.76470588 | 0.50397847 |
| Q9NVM6 | DNAJC17 | QAQAQSEEEEEESR                           | S112           | 0.6377718  | 1.04871568 | 0.84338453 |
| Q99543 | DNAJC2  | NASASFQLEDDK                             | S47            | 0.1147887  | 1.45182927 | 0.53343618 |
| Q99543 | DNAJC2  | NASASFQLEDDK                             | S47            | 0.22936664 | 1.26172634 | 0.6080317  |
| Q99543 | DNAJC2  | NASASFQLEDDK                             | S47,S49        | 0.3059906  | 0.55823596 | 0.66139614 |
| Q99543 | DNAJC2  | NASASFQLEDDK                             | S49            | 0.59934746 | 1.19936046 | 0.82561275 |
| Q5F1R6 | DNAJC21 | QQLSEEEENFSRPQJENPLDDNSEEMEDAPK          | S370           | 0.34452394 | 1.52977136 | 0.67996588 |
| Q5F1R6 | DNAJC21 | EFGDGSDNEMEEHELK                         | S283           | 0.48363709 | 0.58664579 | 0.75785402 |
| Q5F1R6 | DNAJC21 | VDPEDTNLQDQSAK                           | S423           | 0.66506018 | 0.94727393 | 0.85781103 |
| Q9H3Z4 | DNAJC5  | SLSTSGLSHYVLGLDK                         | S10            | 0.20310017 | 2.58891896 | 0.58387059 |
| Q6XZ7  | DNMBP   | HETSDHEAEEPDCIIEAPTSPLGHLTSEYDTR         | S342,S354      | 0.151716   | 2.34755048 | 0.55686437 |
| P26358 | DNMT1   | EADDDVEVDNIPEMPSPK                       | S714           | 0.0577187  | 0.51360544 | 0.47702638 |
| P26358 | DNMT1   | EADDDVEVDNIPEMPSPK                       | S714           | 0.08494102 | 0.75444096 | 0.50397847 |
| O43598 | DNP1    | YFEADPPGQVAASPDPTT                       | S169           | 0.17435903 | 0.63529148 | 0.56898248 |
| Q5QJE6 | DNTTIP2 | LYTSAPNTSQGK                             | S434           | 0.03270218 | 0.77595263 | 0.43874459 |
| Q5QJE6 | DNTTIP2 | ESYTEEIVSEASHVSGISR                      | S148           | 0.23509049 | 6.26795205 | 0.6080317  |
| Q96BY6 | DOCK10  | SQTLPIIR                                 | T1440          | 0.41228543 | 0.77300664 | 0.72049544 |
| Q9H7D0 | DOCK5   | NSTELAPPLPVR                             | S1834          | 0.83634807 | 0.93083046 | 0.9400727  |
| Q96N67 | DOCK7   | SRSLNSNPDISGTPTSPDDEVR                   | S898           | 0.05894023 | 1.35697917 | 0.47702638 |
| Q96N67 | DOCK7   | SMSIDDTPR                                | S182           | 0.05931318 | 1.45955453 | 0.47702638 |
| Q96N67 | DOCK7   | SRSLNSNPDISGTPTSPDDEVR                   | S894,S910      | 0.21763159 | 1.25466412 | 0.60411977 |
| Q96N67 | DOCK7   | MNSLTFK                                  | S1383          | 0.74044173 | 0.95355335 | 0.89994504 |
| Q96N67 | DOCK7   | SNSWVNTGGPK                              | S929           | 0.78407649 | 0.96257897 | 0.92036791 |
| Q92785 | DPF2    | EDSQPPTVPSQR                             | S244           | 0.21984264 | 1.45009292 | 0.60482898 |
| Q16555 | DPYSL2  | GLYDGPVCEVSVTPK                          | T509           | 0.2841979  | 0.80044101 | 0.64892143 |
| Q16555 | DPYSL2  | TVTYPASSAKTSPAK                          | T512,T521,S522 | 0.70064676 | 1.11383995 | 0.87594502 |
| Q14195 | DPYSL3  | GMVDGPFVFLTTTPK                          | T509           | 0.94979567 | 1.01322869 | 0.98215506 |
| Q14126 | DSG2    | AASYTEEDENHTAK                           | S782           | 0.04410952 | 1.31375687 | 0.45441331 |
| Q14126 | DSG2    | VVPSFLPVDQGGSLVGR                        | S680           | 0.98181994 | 0.98544508 | 0.99355276 |
| Q9H410 | DSN1    | SLHLSPEQEQASASYQDR                       | S81            | 0.23519122 | 0.80893434 | 0.6080317  |
| P15924 | DSP     | GLPSYNNMSSAPGSR                          | S2821,S2825    | 0.10064598 | 0.49602363 | 0.52414255 |
| P15924 | DSP     | GLPSYNNMSSAPGSR                          | S2825          | 0.44738269 | 1.28707229 | 0.73811209 |
| P15924 | DSP     | SMSFGQIR                                 | S2209          | 0.53395674 | 0.78462128 | 0.78590527 |
| Q8TEA8 | DTD1    | SASSGAEGDVSSSEREP                        | S196           | 0.16865715 | 0.86036585 | 0.56339013 |
| Q8TEA8 | DTD1    | SASSGAEGDVSSSER                          | S197           | 0.29426886 | 0.61912993 | 0.6555018  |
| Q14204 | DYNC1H1 | TDSTSDGRPAWMR                            | S4368          | 0.22572161 | 0.72836695 | 0.6080317  |

|        |           |                                           |           |            |            |            |
|--------|-----------|-------------------------------------------|-----------|------------|------------|------------|
| Q13409 | DYNC112   | SVSTPSEAGSQSDGDGAVGSR                     | S92       | 0.04952671 | 0.43276681 | 0.45652016 |
| Q13409 | DYNC112   | SVSTPSEAGSQSDGDGAVGSR                     | T95       | 0.622002   | 0.90336022 | 0.83613383 |
| Q9Y6G9 | DYNC11U1  | DFQEYVEPEGDFPASPQR                        | S207      | 0.16740039 | 0.70743572 | 0.56312413 |
| Q9Y6G9 | DYNC11U1  | DFQEYVEPEGDFPASPQR                        | S207      | 0.39484269 | 0.87166383 | 0.71403973 |
| Q9Y6G9 | DYNC11U1  | KPVTVSPTTPTSPTGEAS                        | S510      | 0.72097538 | 0.92537313 | 0.89093621 |
| Q9Y6G9 | DYNC11U1  | KPVTVSPTTPTSPTGEAS                        | T512,S510 | 0.90784199 | 0.96368839 | 0.96679277 |
| Q9Y6G9 | DYNC11U1  | KPVTVSPTTPTSPTGEAS                        | S516      | 0.90954682 | 1.03095238 | 0.9669909  |
| O43237 | DYNC11U2  | DFQDYMEPEEGCQSPQR                         | S194      | 0.0792246  | 0.71159246 | 0.50397847 |
| O43237 | DYNC11U2  | GGPASVSSSPGTSVK                           | S407      | 0.13167546 | 0.78202727 | 0.5444061  |
| O43237 | DYNC11U2  | DFQDYMEPEEGCQSPQR                         | S194      | 0.26601167 | 0.92616679 | 0.63400981 |
| Q13627 | DYRK1A    | IYQYQSR                                   | Y321      | 0.84493648 | 0.9730124  | 0.94448596 |
| Q96JC9 | EAF1      | DNPSPEPQLDDIK                             | S165      | 0.7784791  | 0.95414013 | 0.91504506 |
| O00559 | EBAG9     | KLSDGQTLPTTVDYSSVPK                       | S36       | 0.45285448 | 1.57861508 | 0.73811209 |
| Q99848 | EBNA1BP2  | ESYDDVSSFR                                | S270      | 0.13529994 | 0.71038102 | 0.5475768  |
| Q9H8V3 | ECT2      | AFSFSK                                    | S842      | 0.56193076 | 0.88498789 | 0.80548023 |
| Q96F86 | EDC3      | SQDVAVSPQQQCSK                            | S131      | 0.69842087 | 0.91956374 | 0.87531349 |
| Q6P2E9 | EDC4      | ETCSTLAESPR                               | S844      | 0.10542497 | 0.73652862 | 0.52598269 |
| Q6P2E9 | EDC4      | DSQDASAEQSDHDEVASLASASGGFGTK              | S875      | 0.59520652 | 0.9306962  | 0.82338978 |
| O75530 | EED       | LSSDENSNPLSGDENDDAVSIESGNTERTPTNTNAPGR    | T59,S24   | 0.71762032 | 0.93669528 | 0.88806482 |
| P24534 | EEF1B2    | DDDDIDLFGSDDEESEEA                        | S106      | 0.30687114 | 1.98242541 | 0.66139614 |
| P24534 | EEF1B2    | YGPADVEDTTGSGATDSKDDDDIDLFGSDDEESEEA      | S106      | 0.31708862 | 2.23138952 | 0.66588611 |
| P24534 | EEF1B2    | YGPADVEDTTGSGATDSK                        | S95       | 0.77579025 | 0.9483871  | 0.91412088 |
| P24534 | EEF1B2    | YGPADVEDTTGSGATDSK                        | S90       | 0.8090638  | 0.93980963 | 0.92670839 |
| P29692 | EEF1D     | KPATPAEDDEDDIDLFGSDNEEEDK                 | S162      | 0.40231601 | 1.36354823 | 0.7160132  |
| P29692 | EEF1D     | ATAPQQTQHVSPMR                            | S133      | 0.52083452 | 0.8654311  | 0.77620221 |
| P29692 | EEF1D     | KPATPAEDDEDDIDLFGSDNEEEDK                 | T147,S162 | 0.59528021 | 1.48156954 | 0.82338978 |
| O00418 | EEF2K     | LEGVDGGQSPR                               | S18       | 0.1129455  | 0.91428571 | 0.53343618 |
| O00418 | EEF2K     | ESENSGDSGYPSEK                            | S445      | 0.82845897 | 1.01712741 | 0.9364171  |
| Q96C19 | EFHD2     | RADLNQIGIGEPQSPSR                         | S76       | 0.07935778 | 0.67467881 | 0.50397847 |
| Q96C19 | EFHD2     | RADLNQIGIGEPQSPSR                         | S74       | 0.1163031  | 0.66716252 | 0.53343618 |
| Q96C19 | EFHD2     | ADLNQIGIGEPQSPSR                          | S74       | 0.12412525 | 0.67817361 | 0.53975675 |
| P00533 | EGFR      | GSHQSLDNPDYQQDFFPK                        | S1162     | 0.10046487 | 2.7670479  | 0.52414255 |
| P00533 | EGFR      | GSHQSLDNPDYQQDFFPK                        | S1166     | 0.10918318 | 3.62251043 | 0.53337143 |
| P00533 | EGFR      | ELVEPLTPSGEAPNQALLR                       | T693      | 0.79339462 | 1.15870306 | 0.9228136  |
| Q9GZT9 | EGLN1     | AKPPADPAAAAASPCR                          | S125      | 0.15616751 | 0.6552645  | 0.55688781 |
| Q8NDI1 | EHBP1     | QTESDPDADRITLHNADHSSK                     | S787      | 0.00967521 | 1.62269558 | 0.37254089 |
| Q8NDI1 | EHBP1     | APAPPVLSPK                                | S408      | 0.276196   | 0.72999405 | 0.64141539 |
| Q8NDI1 | EHBP1     | TSGSDDPGCSNTDSTQAQVLLGK                   | S664      | 0.40067304 | 0.79272625 | 0.7160132  |
| Q8NDI1 | EHBP1     | KPSEDEVLNK                                | S1058     | 0.64976966 | 1.12836213 | 0.84958493 |
| Q8N3D4 | EHBP1L1   | ANEAGGQVQGEAPRPPETSPEMR                   | T284      | 0.18542971 | 0.73785971 | 0.57433231 |
| Q9H4M9 | EHD1      | DKPTYDEIFYTLSPVNGK                        | S456      | 0.59402181 | 0.9003209  | 0.82293287 |
| Q9NZN4 | EHD2      | YDEIFYNLAPADGKLSGSK                       | S468      | 0.01303729 | 1.71606218 | 0.39919401 |
| Q9NZN4 | EHD2      | GPDEAMEDGEEGSDDEAEWVVTK                   | S438      | 0.84006935 | 0.97119342 | 0.94241005 |
| Q96KQ7 | EHMT2     | LNSGGGLSEELGSAR                           | S232      | 0.02040781 | 0.47072078 | 0.41830815 |
| O14681 | EI24      | FSPSPHPSAK                                | S326,S330 | 0.04225446 | 0.37179487 | 0.45441331 |
| Q9BY44 | EIF2A     | SDKSPDLAPTAPQSTPR                         | S506      | 0.13373125 | 1.32436678 | 0.5475768  |
| Q9BY44 | EIF2A     | SPDLAPTAPQSTPR                            | S506      | 0.70112345 | 0.89618529 | 0.87594502 |
| Q9UI10 | EIF2B4    | ASPSTAGETPSGVK                            | S130      | 0.90660675 | 0.98868703 | 0.98667296 |
| P20042 | EIF2S2    | IESDVQEPTEPEDDLDIMLGK                     | S105      | 0.03784273 | 2.16333252 | 0.44815912 |
| P20042 | EIF2S2    | SGDEMIFFPTMSK                             | S2        | 0.1149437  | 0.82147943 | 0.53343618 |
| P20042 | EIF2S2    | IESDVQEPTEPEDDLDIMLGK                     | T111      | 0.12103969 | 1.67884909 | 0.53774744 |
| P55884 | EIF3B     | AQAVSEDAAGGNEGR                           | S125      | 0.08412202 | 0.82386338 | 0.50397847 |
| P55884 | EIF3B     | SDSRAQAVSEDAAGGNEGR                       | S117      | 0.14389108 | 0.59159483 | 0.53532644 |
| P55884 | EIF3B     | SDSRAQAVSEDAAGGNEGR                       | S119      | 0.24862794 | 0.6323868  | 0.61691256 |
| P55884 | EIF3B     | TEPAAEAESAAGSPSPAAEELPGSHAEPVPAQGEAPGEQAR | S85       | 0.29674223 | 0.83396705 | 0.63749804 |
| Q99613 | EIF3C     | QNPEQSADEDAEK                             | S166      | 0.57739864 | 0.95680968 | 0.81432655 |
| Q99613 | EIF3C     | QPLLLSEDEEDTK                             | S39       | 0.72758122 | 0.96467066 | 0.89396708 |
| O75821 | EIF3G     | GIPLATGDTSPPELLPGAPLPPPK                  | S42       | 0.51572637 | 1.57614285 | 0.77421589 |
| O75821 | EIF3G     | GIPLATGDTSPPELLPGAPLPPPK                  | T41       | 0.62720269 | 1.30358352 | 0.83899389 |
| O15372 | EIF3H     | DFSPEALK                                  | S183      | 0.13403156 | 0.68174001 | 0.5475768  |
| P23588 | EIF4B     | ARPATDSFDDYPPR                            | S207      | 0.0464776  | 1.91505917 | 0.45625798 |
| P23588 | EIF4B     | SLENETLNK                                 | S445      | 0.15310547 | 0.79021716 | 0.55688781 |
| P23588 | EIF4B     | EEDCHSPTSKPKPDQPLK                        | T461      | 0.49432678 | 1.15434925 | 0.76357885 |
| P23588 | EIF4B     | AFGSGYR                                   | S283      | 0.59347998 | 1.11355311 | 0.82284423 |
| P23588 | EIF4B     | YAALSVDGEDENEGEDYAE                       | S597      | 0.88430332 | 1.04973412 | 0.95812202 |
| Q13541 | EIF4EBP1  | RVVLGDGVQLPPDYSTTPGGTLFSTTPGGTR           | T37,T41   | 0.35492662 | 1.66335555 | 0.68723258 |
| Q13541 | EIF4EBP1  | TPPRDLPTIPGVTPSSDEPPMEASQSHLR             | T77       | 0.37780806 | 2.27207759 | 0.70485968 |
| Q13541 | EIF4EBP1  | DLPTIPGVTPSSDEPPMEASQSHLRNSPEDK           | S94       | 0.45031313 | 1.44032975 | 0.73811209 |
| Q13541 | EIF4EBP1  | FLMECRNSPVTK                              | S65       | 0.86387615 | 1.0942919  | 0.95206063 |
| Q9NRA8 | EIF4ENIF1 | ASEENLLSSSVPSADRDSPTTNSK                  | S752      | 0.7765705  | 0.89976489 | 0.91412088 |
| Q04637 | EIF4G1    | EAAALPPVSPLK                              | S1231     | 0.68880369 | 0.90291615 | 0.86958941 |
| P78344 | EIF4G2    | FSPTMGR                                   | S395      | 0.45094884 | 0.81256134 | 0.73811209 |
| O60841 | EIF5B     | KQSFDDNDSELEEDK                           | S107      | 0.03895747 | 1.52657476 | 0.44872753 |
| O60841 | EIF5B     | KWDGSEDEEDNSK                             | S164      | 0.06642312 | 1.30109671 | 0.48985272 |
| O60841 | EIF5B     | KQSFDDNDSELEEDK                           | S107,S113 | 0.18817978 | 1.47059113 | 0.57474321 |
| O60841 | EIF5B     | VEMYSGSDDDDDFNK                           | S137      | 0.40240386 | 0.9158466  | 0.7160132  |
| O60841 | EIF5B     | QSFDDNDSELEEDK                            | S113      | 0.41113782 | 0.88139404 | 0.71912578 |
| O60841 | EIF5B     | NKPGPNIESGNEDDASFK                        | S214      | 0.75402572 | 0.94863627 | 0.90767974 |
| Q99607 | ELF4      | STSPVTDPSPIR                              | S188      | 0.40986375 | 0.77901131 | 0.71762621 |
| P41970 | ELK3      | AASPVLLSSNSQK                             | S396      | 0.40864437 | 0.721544   | 0.71694309 |
| P50402 | EMD       | QSVTSPFDADAFHHQVHDDLLSSSEEECK             | S143      | 0.16704317 | 2.07045573 | 0.56312413 |

|        |          |                                                |           |            |            |            |
|--------|----------|------------------------------------------------|-----------|------------|------------|------------|
| Q9HC35 | EML4     | APVSSSTEVSIQSNTPPPSQPLNETAEESR                 | S895      | 0.18541071 | 0.59614183 | 0.57433231 |
| Q9HC35 | EML4     | ASPSQPQSSQLQIHR                                | S144,S146 | 0.19554947 | 0.60334072 | 0.58092537 |
| Q9HC35 | EML4     | APVSSSTEVSIQSNTPPPSQPLNETAEESR                 | T897,T899 | 0.74657692 | 0.8978125  | 0.90316039 |
| Q96N21 | ENTHD2   | HFEASCGQLSPAR                                  | S356      | 0.39053194 | 0.77058519 | 0.71132527 |
| Q09472 | EP300    | TEIKEEEDQPSTATSQSSPAPGQSK                      | S1038     | 0.82693746 | 0.93654005 | 0.9364171  |
| Q96L91 | EP400    | ALSPVTSR                                       | S736      | 0.16195131 | 0.71087197 | 0.55797736 |
| Q9H4G0 | EPB41L1  | DKSDSDTEGLLFSR                                 | S648      | 0.02228166 | 0.58223506 | 0.41830815 |
| Q9H4G0 | EPB41L1  | SLDGAEFRSPASVSENHDAGPDGDK                      | S437,S441 | 0.02872888 | 0.2663994  | 0.42832144 |
| Q9H4G0 | EPB41L1  | GACSTPDMMPQFEPVK                               | T686      | 0.03284934 | 0.46155472 | 0.43874459 |
| Q9H4G0 | EPB41L1  | SLDGAEFRSPASVSENHDAGPDGDK                      | S430,S441 | 0.06629158 | 0.74891462 | 0.48985272 |
| Q9H4G0 | EPB41L1  | SLDGAEFRSPASVSENHDAGPDGDK                      | S430      | 0.06762357 | 1.2900165  | 0.49083932 |
| Q9H4G0 | EPB41L1  | SDSDTEGLLFSR                                   | S650      | 0.14912299 | 0.80448549 | 0.55352644 |
| Q9H4G0 | EPB41L1  | SEAEEGEVTRPTK                                  | T475      | 0.22103325 | 1.17369309 | 0.60656454 |
| Q9H4G0 | EPB41L1  | GAPSQDDESGGIEDSPDRGACSTPDMMPQFEPVK             | S678,S685 | 0.22526182 | 0.5316634  | 0.6080317  |
| Q9H4G0 | EPB41L1  | SLSPIHGK                                       | S784      | 0.32007506 | 0.86216696 | 0.86890084 |
| Q9H4G0 | EPB41L1  | APESDTGDEDDQDQERDTVFLK                         | T580      | 0.32396066 | 1.31428149 | 0.67067311 |
| Q9H4G0 | EPB41L1  | GAPSQDDESGGIEDSPDR                             | S678      | 0.40688318 | 0.75939192 | 0.71690855 |
| Q9H4G0 | EPB41L1  | GAPSQDDESGGIEDSPDRGACSTPDMMPQFEPVK             | S678      | 0.41900857 | 1.07370375 | 0.72443047 |
| Q9H4G0 | EPB41L1  | GAPSQDDESGGIEDSPDRGACSTPDMMPQFEPVK             | T686      | 0.4339423  | 0.72650473 | 0.73152094 |
| Q9H4G0 | EPB41L1  | DYSEADGLSER                                    | S75       | 0.44586772 | 0.76971768 | 0.73811209 |
| Q9H4G0 | EPB41L1  | SLDGAEFRSPASVSENHDAGPDGDK                      | S441      | 0.4625824  | 0.79274611 | 0.74438607 |
| Q9H4G0 | EPB41L1  | APESDTGDEDDQDQERDTVFLK                         | S578      | 0.59251048 | 1.08854167 | 0.82284423 |
| Q9H4G0 | EPB41L1  | LPSSPASPSK                                     | S544      | 0.78500023 | 1.05062536 | 0.92039443 |
| Q9H4G0 | EPB41L1  | SLDGAEFRSPASVSENHDAGPDGDK                      | S441      | 0.79255143 | 0.90852525 | 0.9228136  |
| Q9H4G0 | EPB41L1  | HQASINELK                                      | S510      | 0.93475613 | 1.01674107 | 0.97652346 |
| O43491 | EPB41L2  | EISPGSGPGEIR                                   | S715      | 0.07693756 | 1.1439559  | 0.50397847 |
| O43491 | EPB41L2  | FLTGSK                                         | S513      | 0.08585937 | 0.38914057 | 0.50397847 |
| O43491 | EPB41L2  | EVAENQQNQSSDPEEEK                              | S39       | 0.08664194 | 1.25723577 | 0.50489821 |
| O43491 | EPB41L2  | EISPGSGPGEIR                                   | S718      | 0.19299174 | 0.82670952 | 0.57728191 |
| O43491 | EPB41L2  | SYTLVVAK                                       | S87       | 0.22164241 | 0.76428571 | 0.60775196 |
| P29317 | EPHA2    | ARQSPEDVYFSK                                   | S570      | 0.0597843  | 1.50173744 | 0.50172638 |
| P29317 | EPHA2    | VLEDDPEATYTTSGGK                               | T771      | 0.11128986 | 0.38748403 | 0.53343618 |
| P29317 | EPHA2    | LPSTSGSEGVFPR                                  | S897,S901 | 0.23522829 | 0.71040424 | 0.6080317  |
| P29317 | EPHA2    | LPSTSGSEGVFPR                                  | S901      | 0.37037912 | 1.44914135 | 0.70105255 |
| P29317 | EPHA2    | LPSTSGSEGVFPR                                  | S897      | 0.50065835 | 0.70520196 | 0.76563097 |
| Q9Y6I3 | EPN1     | SPGAFDMGVR                                     | S435      | 0.09853559 | 0.5570846  | 0.5228915  |
| P07814 | EPRS     | EYIPGQPPLQSSDSSPTRNSEPAGLETPEAK                | S886      | 0.24847892 | 1.50865509 | 0.61691256 |
| P07814 | EPRS     | EYIPGQPPLQSSDSSPTR                             | S882,S886 | 0.40180909 | 0.87238744 | 0.7160132  |
| P07814 | EPRS     | EYIPGQPPLQSSDSSPTR                             | S886      | 0.81751296 | 1.03617363 | 0.93149014 |
| P07814 | EPRS     | EYIPGQPPLQSSDSSPTR                             | T888,S886 | 0.83763318 | 0.95843685 | 0.94121001 |
| P42566 | EPS15    | LNDPFPQFFGNDSPK                                | S814      | 0.76033218 | 0.91982379 | 0.90891497 |
| Q9UBC2 | EPS15L1  | GSFGAMDDPFK                                    | S593      | 0.35018711 | 0.70822794 | 0.68418829 |
| Q9UBC2 | EPS15L1  | STPSHGSVSLNSTGSLSPK                            | S238,S255 | 0.46410266 | 0.87044173 | 0.74559723 |
| Q12929 | EPS8     | DSVSSVSDISQYR                                  | S58       | 0.98738905 | 1.00380504 | 0.99494412 |
| Q9H6S3 | EPS8L2   | HSPTEPTPPGDALPPVSSPHTHR                        | S463,T483 | 0.28487047 | 0.80445434 | 0.64892143 |
| Q96RT1 | ERBB2IP  | ETDLSLSEVTHNSNQNSNCSSPSR                       | S642      | 0.05048563 | 0.62407336 | 0.45652016 |
| Q96RT1 | ERBB2IP  | TMSVDFNYSR                                     | S1158     | 0.0736377  | 0.31491444 | 0.49918003 |
| O15083 | ERC2     | TFWSPELK                                       | S187      | 0.26581622 | 0.75659991 | 0.63400981 |
| P28715 | ERCC5    | NAPAAVDEGSISPR                                 | S384      | 0.04261176 | 1.2481203  | 0.45441331 |
| P28715 | ERCC5    | ELTPASPTCTNSVSK                                | S526      | 0.4354626  | 1.09937888 | 0.73300743 |
| Q2NKX8 | ERCC6L   | IVSDGEDDEDSFK                                  | S1028     | 0.13842021 | 0.84395604 | 0.54797298 |
| P50548 | ERF      | GSVSDCSDGTSELEPLGEDPR                          | S185      | 0.06688074 | 0.70148026 | 0.49083932 |
| P50548 | ERF      | VRGEGPGEAGGLTPR                                | T526      | 0.24955168 | 0.8092781  | 0.61802971 |
| P50548 | ERF      | TPADTGFAFPDWAYKPESSPGR                         | S21       | 0.43803788 | 1.5912109  | 0.73339934 |
| P50548 | ERF      | LGRGVSDCSDGTSELEPLGEDPR                        | S185      | 0.53847325 | 1.17008599 | 0.78747426 |
| Q86X53 | ERIC1    | ARQEEGADASEEDPTPAGEEDVK                        | S254      | 0.47938734 | 0.89518229 | 0.75541886 |
| Q86X53 | ERIC1    | DTREEDGADASEEDLTR                              | S238      | 0.67962873 | 1.08539604 | 0.86312417 |
| Q86X53 | ERIC1    | QEEGADASEEDPTPAGEEDVK                          | S254      | 0.87079913 | 0.96748735 | 0.9551058  |
| Q5FWF5 | ESCO1    | LDSQVSPK                                       | S412      | 0.15453391 | 0.66538313 | 0.55688781 |
| Q9H501 | ESF1     | ALAEAESEELPSVDLNDPYFAEEVK                      | S657      | 0.13467696 | 2.55599238 | 0.5475768  |
| Q9H6T0 | ESRP2    | MQGVPYTAGMK                                    | T684      | 0.97426613 | 1.0058309  | 0.98993501 |
| P11474 | ESRRA    | GSSETETEPVALAPGPAPTR                           | S27       | 0.08535191 | 0.2400837  | 0.50397847 |
| Q6ZN32 | ETV3L    | FNFSK                                          | S122      | 0.25725111 | 0.65851179 | 0.62621067 |
| Q96A65 | EXOC4    | TLTSDDDVEDRENEK                                | T30       | 0.05369496 | 0.67261337 | 0.46935393 |
| Q06265 | EXOSC9   | APIDTSDVEEK                                    | S306      | 0.26088465 | 0.87238523 | 0.62872273 |
| Q95677 | EYA4     | NNPSPPPSDLER                                   | S361      | 0.70122111 | 0.95102765 | 0.87594502 |
| Q9Y624 | F11R     | VIYQSPARSEGEFK                                 | S284,S287 | 0.25123996 | 0.34083993 | 0.61962985 |
| Q9Y624 | F11R     | VIYQSPARSEGEFK                                 | S287      | 0.74777326 | 1.10260397 | 0.90350024 |
| P55085 | F2RL1    | QMQLVLSK                                       | S373      | 0.0588838  | 0.75564299 | 0.47702638 |
| Q5T9C2 | FAM102A  | SSSLDLTHR                                      | S251      | 0.40225273 | 0.83368928 | 0.7160132  |
| Q9BTL3 | FAM103A1 | RPPEPPIVEEWNRSR                                | S36       | 0.70019453 | 1.09453245 | 0.87594502 |
| Q969W3 | FAM104A  | GADAGSSGGTGPTGEGYSPAASTR                       | S21       | 0.1546702  | 0.62006427 | 0.55688781 |
| Q8IWE2 | FAM114A1 | IHGVSNGSSEGAQPNTENGVEITDAATDQGAESPPTSPPSSASR   | S196      | 0.21239604 | 2.69065237 | 0.59909252 |
| Q6P1L5 | FAM117B  | SASWGSTDQLK                                    | S273      | 0.0428515  | 0.79373281 | 0.45441331 |
| Q9NZB2 | FAM120A  | SSPINPAQSGSPNHVDSAYFPGSSTSSSSDNDDESGGATNHISGNK | S442,S435 | 0.23605968 | 0.71755024 | 0.6080317  |
| Q9NZB2 | FAM120A  | SSPINPAQSGSPNHVDSAYFPGSSTSSSSDNDDESGGATNHISGNK | S435      | 0.73370588 | 0.84927423 | 0.89605782 |
| Q96E09 | FAM122A  | RIDFIPVSPAPSPTR                                | S143,S147 | 0.18160565 | 1.43605432 | 0.57200583 |
| Q96E09 | FAM122A  | VSTTDDSPVSPAQAASPFPLDELSSK                     | S270      | 0.42716279 | 1.71991607 | 0.72966058 |
| Q96E09 | FAM122A  | SNSAPLIHGLSDTSPVQAEAPSAR                       | T47       | 0.43886527 | 1.81229197 | 0.73371456 |
| Q7Z309 | FAM122B  | RIDFTVSPAPSPTR                                 | S115,S119 | 0.50189205 | 0.87394451 | 0.76563097 |
| Q96TA1 | FAM129B  | GLLAQGLRPESPPAGPLLNGAPAGESPQPK                 | S665,S681 | 0.69121387 | 0.84889506 | 0.8713243  |

|         |          |                                        |           |            |            |             |
|---------|----------|----------------------------------------|-----------|------------|------------|-------------|
| Q96TA1  | FAM129B  | AAPEASSPAPLQHLPGK                      | S692,S696 | 0.94432131 | 1.01495576 | 0.98136469  |
| Q8NC44  | FAM134A  | QALDSEEEEEVAAK                         | S385      | 0.84832184 | 1.01954397 | 0.94550823  |
| Q86VR2  | FAM134C  | GQTLTEGSEDLGHSDPEESFAR                 | S320      | 0.00373483 | 1.77275886 | 0.28722668  |
| Q86VR2  | FAM134C  | GQTLTEGSEDLGHSDPEESFAR                 | S313,S320 | 0.19250683 | 1.537062   | 0.57728191  |
| Q9Y6X4  | FAM169A  | NQSEEQSEASSEQLDQFTQSAEK                | S619      | 0.27347921 | 0.89750609 | 0.63888342  |
| Q9Y6X4  | FAM169A  | LESTARPSSESSEFEELEEPEQR                | S376      | 0.76310407 | 0.90760596 | 0.91002821  |
| A8MVVW0 | FAM171A2 | RDSLTSPEDELGAEVGDEAGDK                 | S792      | 0.42397348 | 0.67807003 | 0.72757489  |
| Q6UWZ7  | FAM175A  | GFGEYSRSPTF                            | S406      | 0.75852499 | 1.01952353 | 0.90833103  |
| P78312  | FAM193A  | LVLAESPPQK                             | S1144     | 0.00582405 | 0.58773616 | 0.31900981  |
| P78312  | FAM193A  | ADSPPPSYPTQAEQAPNTCECHVCK              | S393      | 0.10580241 | 0.76496691 | 0.52598269  |
| C9JLW8  | FAM195B  | SPSSSEIFTPAHEENVR                      | S21       | 0.71296277 | 0.89934823 | 0.88522134  |
| Q5VWN6  | FAM208B  | CTGDFSPSPEK                            | S1541     | 0.05978449 | 0.49077255 | 0.47702638  |
| Q641Q2  | FAM21A   | GLFSEDEEDLDFSSQSASK                    | S539      | 0.15531622 | 1.60344886 | 0.56688781  |
| Q9Y4E1  | FAM21C   | TPSDDEEDNLFAPPK                        | S333      | 0.1654758  | 1.10560626 | 0.56312413  |
| Q9Y4E1  | FAM21C   | GLFSEDEEDLDFSSQSASNLK                  | S539      | 0.16656415 | 1.98044598 | 0.56312413  |
| Q9Y4E1  | FAM21C   | ETVSEAPPLFSDDEEK                       | S726      | 0.32124811 | 1.23216472 | 0.67020204  |
| Q9Y4E1  | FAM21C   | AVASPEATVVSQTDENK                      | S498      | 0.32167677 | 0.85915526 | 0.67020204  |
| Q9Y4E1  | FAM21C   | RTPSDDEEDNLFAPPK                       | S333      | 0.38833379 | 1.13112285 | 0.71060254  |
| Q9Y4E1  | FAM21C   | SRPTSFADELAAR                          | S288      | 0.39179027 | 1.22366696 | 0.71204522  |
| Q9Y4E1  | FAM21C   | SRPTSFADELAAR                          | S284,S288 | 0.5070171  | 0.81197479 | 0.76766855  |
| Q9Y4E1  | FAM21C   | RSRPTSFADELAAR                         | S284,S288 | 0.74011573 | 0.92677824 | 0.899694504 |
| Q9Y4E1  | FAM21C   | TVLSLFDEEEDK                           | S800      | 0.93228351 | 1.03753728 | 0.97583851  |
| Q14153  | FAM53B   | SSSFLPSR                               | S167      | 0.06333159 | 0.81594322 | 0.47702638  |
| Q14153  | FAM53B   | SRSQPCVLNDK                            | S268      | 0.22678655 | 1.70826251 | 0.6080317   |
| Q9NYF3  | FAM53C   | SRSQPCLDAR                             | S271      | 0.62014187 | 0.92077215 | 0.83526343  |
| Q9BSJ6  | FAM64A   | SLQHQEQLDESK                           | S16       | 0.00502235 | 0.51211837 | 0.31681062  |
| Q5HYJ3  | FAM76B   | ISNLSPEEEQGLWK                         | S193      | 0.61687753 | 0.94326241 | 0.83347439  |
| Q6ZRV2  | FAM83H   | RGSPVPPVPER                            | S914      | 0.01225804 | 0.61948529 | 0.39919401  |
| Q6ZRV2  | FAM83H   | GSPTSAYPER                             | S870      | 0.01250318 | 0.54823824 | 0.39919401  |
| Q6ZRV2  | FAM83H   | VPVPGPGSGGNGPER                        | S647      | 0.01812526 | 0.52591541 | 0.41830815  |
| Q6ZRV2  | FAM83H   | GSPTPGFSTR                             | S881      | 0.07433834 | 0.61355014 | 0.49918003  |
| Q6ZRV2  | FAM83H   | RGSPPTGFIEQK                           | S892      | 0.0799877  | 0.68268985 | 0.50397847  |
| Q6ZRV2  | FAM83H   | KGSPTPGFSTR                            | S881      | 0.43047216 | 0.70732452 | 0.73031829  |
| Q6ZRV2  | FAM83H   | RLSLGQGDSTEAATEER                      | S1003     | 0.43167761 | 0.80357143 | 0.73056398  |
| Q658Y4  | FAM91A1  | SPVQEAASATDTDTNSQEDPADTASVSSLSTGHTK    | S355      | 0.36972882 | 1.24123187 | 0.70105255  |
| Q9HB96  | FANCE    | SLESADGGSASPDK                         | S249      | 0.11440496 | 0.67341639 | 0.53343618  |
| Q9NV11  | FANCI    | EDGEDENEETGASEHGGQNK                   | S1312     | 0.06203575 | 0.5555323  | 0.47702638  |
| Q9NV11  | FANCI    | TIETSPSLSR                             | S407      | 0.11819817 | 0.59133647 | 0.53608376  |
| Q9Y4F1  | FARP1    | SPDEATAADQESSEDLASRSTSLER              | S899      | 0.05644937 | 1.75407001 | 0.47702638  |
| Q9Y4F1  | FARP1    | LGAPENSGISTLER                         | S23       | 0.29087429 | 0.72099375 | 0.65205353  |
| Q9Y4F1  | FARP1    | VSAGEPGSHPSAPR                         | S427      | 0.61775634 | 1.08110631 | 0.83417356  |
| Q9Y4F1  | FARP1    | SPDEATAADQESSEDLASR                    | S889      | 0.89786717 | 1.01649557 | 0.96293924  |
| P49327  | FASN     | ADEASELACPTPK                          | T2204     | 0.45790338 | 1.15252785 | 0.74108047  |
| Q9HCM7  | FBRSL1   | RPLEAGSPQGDLEPACDGAR                   | S141      | 0.05688501 | 0.6880716  | 0.47702638  |
| Q5XUX1  | FBXW9    | TWDDDDSPPESETDPDAQAK                   | S18       | 0.06303879 | 1.4903443  | 0.47702638  |
| Q5XUX1  | FBXW9    | VLSPPK                                 | S39       | 0.59279348 | 0.88678733 | 0.82284423  |
| Q0JRZ9  | FCHO2    | DAESVECPDADSLNIPDVDEEGYSIKPETNQNDTK    | S312      | 0.24622603 | 1.74115757 | 0.61377267  |
| Q0JRZ9  | FCHO2    | NLSNEELTK                              | S403      | 0.50635254 | 0.9403794  | 0.76766855  |
| Q6ZV73  | FGD6     | GVSSSFDMPK                             | S554      | 0.19352315 | 1.08100681 | 0.57728191  |
| Q6ZV73  | FGD6     | ITFCPSRSLDEADSENK                      | S1197     | 0.19791581 | 1.35683578 | 0.58169594  |
| Q6ZV73  | FGD6     | AASEELLEK                              | S515      | 0.24483781 | 1.15909091 | 0.61377267  |
| Q6ZV73  | FGD6     | IEFADLSPSPSFEK                         | S230      | 0.45878085 | 1.62628715 | 0.74160036  |
| Q6ZV73  | FGD6     | AYSTENYSLESQK                          | S692      | 0.72863005 | 1.06776324 | 0.89429861  |
| Q6ZV73  | FGD6     | AESLDDQMLSR                            | S721      | 0.91059822 | 1.01142426 | 0.9669909   |
| O95684  | FGFR10P  | GPTTGEGALDLSLVHSPKSPGPK                | S156,S160 | 0.71322262 | 1.0916775  | 0.88522134  |
| P22455  | FGFR4    | RPPGPDLSPDGPR                          | S573      | 0.0052444  | 0.23288501 | 0.31900981  |
| Q9Y613  | FHOD1    | EPLIPASPK                              | S523      | 0.38386423 | 0.81892707 | 0.70957373  |
| Q6UN15  | FIP1L1   | DHSPTPSVFNDSDEERYR                     | S492,S500 | 0.04663104 | 1.42464498 | 0.45625798  |
| Q6UN15  | FIP1L1   | ERDHSPTPSVFNDSDEER                     | S492      | 0.64968047 | 1.09452736 | 0.84958493  |
| Q6UN15  | FIP1L1   | DHSPTPSVFNDSDEER                       | S492      | 0.72846642 | 0.97086093 | 0.89429861  |
| Q6UN15  | FIP1L1   | DHSPTPSVFNDSDEER                       | T494,S500 | 0.76185967 | 1.07298906 | 0.90951853  |
| Q5T1M5  | FKBP15   | RPSQEQSASASSGQPQAPLNR                  | S960      | 0.36087813 | 1.15144766 | 0.692567    |
| Q5T1M5  | FKBP15   | SSLSGDEEDELFK                          | S1161     | 0.49725882 | 1.15651746 | 0.76446134  |
| Q5T1M5  | FKBP15   | SSLSGDEEDELFK                          | S1164     | 0.86319446 | 1.01203216 | 0.95161386  |
| Q02790  | FKBP4    | AEASSGDHPTDTEMK                        | S430      | 0.48328465 | 0.87259548 | 0.75785402  |
| Q8NFG4  | FLCN     | AHSPAEGASVSSSPGPK                      | S62       | 0.26664242 | 1.32130814 | 0.63463477  |
| Q13045  | FLII     | NAEAVLQSPGLSGK                         | S856      | 0.21440254 | 0.73833544 | 0.60179491  |
| P21333  | FLNA     | AFGPGLQGGSAGSPAR                       | S1084     | 0.23941165 | 0.6366938  | 0.61121846  |
| P21333  | FLNA     | CSGPGLSPGMVR                           | S1459     | 0.97280546 | 1.00739176 | 0.98966465  |
| O75369  | FLNB     | YADEEIPRSPFK                           | S1505     | 0.87742942 | 0.96736142 | 0.95556965  |
| Q96PY5  | FMNL2    | SIEDLHR                                | S171      | 0.42834695 | 1.12934363 | 0.72966058  |
| Q5T0N5  | FNBP1L   | HSSDINHVLVTQGRESPEGSYTDANQEV           | S501      | 0.21832448 | 1.30008271 | 0.60411977  |
| Q8N3X1  | FNBP4    | ALEEGDGSVSGSSPR                        | S432      | 0.3564404  | 1.11575803 | 0.68810579  |
| Q8N3X1  | FNBP4    | TGRDTPENGETAIGAENSEK                   | T479      | 0.52321007 | 1.18086957 | 0.77709199  |
| Q53EP0  | FNDC3B   | LNSPPSIYK                              | S208      | 0.0460695  | 0.71712277 | 0.45625798  |
| P15407  | FOSL1    | RRPCEQSPPEEER                          | S101      | 0.50382846 | 1.08494209 | 0.76766855  |
| P15408  | FOSL2    | QEPLLEEDSPSSSAGLDK                     | S230      | 0.22940932 | 1.24329329 | 0.6080317   |
| P15408  | FOSL2    | RSSSSGQSDSLNSLNTLLAL                   | S308      | 0.26704084 | 1.40462896 | 0.63484011  |
| P15408  | FOSL2    | GSSGSPAHAESYSSGGGQK                    | S19       | 0.67456752 | 1.07257159 | 0.86131187  |
| P55317  | FOXA1    | TGQLEGAPAGPAASQTLDHSGATATGGASELK       | S331      | 0.95453983 | 0.9690965  | 0.98367301  |
| Q9Y261  | FOXA2    | AAAGAQAQSLQLEAGAPASETGAGTSPHSSASPCQEHK | S303,S306 | 0.12090644 | 0.60215606 | 0.53774744  |



|        |          |                                            |                    |                |            |            |            |
|--------|----------|--------------------------------------------|--------------------|----------------|------------|------------|------------|
| Q9Y261 | FOXA2    | AAAGAQAQAQLGEAAGPASET                      | PAGTESPHSSASPCQEHK | T301           | 0.51422027 | 0.7806094  | 0.77363444 |
| Q9P0K8 | FOXJ2    | CSPGSPDTPNATLSK                            |                    | S46            | 0.49829204 | 1.10962242 | 0.76446134 |
| P85037 | FOXK1    | EEAPASPLRPLYPQISPLK                        |                    | S213,S223      | 0.04038931 | 0.54988459 | 0.45309702 |
| P85037 | FOXK1    | SGGLQTPECLSR                               |                    | T436           | 0.27335485 | 1.34244163 | 0.63888342 |
| P85037 | FOXK1    | EEAPASPLRPLYPQISPLK                        |                    | S213           | 0.33458166 | 2.00748963 | 0.67662903 |
| P85037 | FOXK1    | SGGLQTPECLSR                               |                    | S441           | 0.36720708 | 0.74437274 | 0.69793663 |
| P85037 | FOXK1    | SGGLQTPECLSRREGSPIPHDPEFGSK                |                    | S441,S445      | 0.68193052 | 0.9104285  | 0.86504202 |
| Q01167 | FOXK2    | EGSPAPLEPEPGAAQPK                          |                    | S398           | 0.54673078 | 0.82845061 | 0.7933521  |
| Q8IVH2 | FOXP4    | RDSSSHEETPGSHPLYGHGECK                     |                    | S291           | 0.04568338 | 0.3799566  | 0.45625798 |
| Q70Z53 | FRA10AC1 | SEDSLRLNSDEEESAASELWK                      |                    | S278           | 0.04440658 | 1.42399807 | 0.45441331 |
| Q8IY81 | FTSJ3    | GTEASSGTEAATGLEGEEK                        |                    | S598           | 0.15985014 | 0.82458888 | 0.55746307 |
| Q8IY81 | FTSJ3    | SDDDDGFEIVPIEDPAK                          |                    | S644           | 0.89731001 | 1.03161751 | 0.96293924 |
| Q96AE4 | FUBP1    | QQAAYYAQTSPPQMPQHPPAPQGG                   |                    | S630           | 0.87261747 | 1.06011905 | 0.95542841 |
| Q9BWH2 | FUNDC2   | SNQIPTVTR                                  |                    | S151           | 0.02722427 | 0.2775378  | 0.41837587 |
| P51114 | FXR1     | DPDSNPYSLLDNTESDQTADTDASESHHSTNRR          |                    | T500           | 0.11018416 | 1.34964526 | 0.53343618 |
| P51114 | FXR1     | DPDSNPYSLLDNTESDQTADTDASESHHSTNR           |                    | S485           | 0.17920821 | 0.82672065 | 0.56898248 |
| P51114 | FXR1     | RGPNYTSGYGTNSELSNPSETESER                  |                    | S409           | 0.19704148 | 0.78391685 | 0.58169594 |
| P51114 | FXR1     | DPDSNPYSLLDNTESDQTADTDASESHHSTNR           |                    | T500           | 0.25000934 | 1.22912252 | 0.61811355 |
| P51114 | FXR1     | DPDSNPYSLLDNTESDQTADTDASESHHSTNR           |                    | S494           | 0.32165571 | 1.21022797 | 0.67020204 |
| P51114 | FXR1     | DPDSNPYSLLDNTESDQTADTDASESHHSTNR           |                    | S496           | 0.75932425 | 1.03414391 | 0.90862076 |
| P51114 | FXR1     | RGPNYTSGYGTNSELSNPSETESER                  |                    | S406,S409      | 0.80641667 | 1.03698934 | 0.92607772 |
| P51114 | FXR1     | DPDSNPYSLLDNTESDQTADTDASESHHSTNR           |                    | T491           | 0.84117473 | 1.05911811 | 0.94290531 |
| P51116 | FXR2     | DPDSNPYSLLDNTSEPEPPVDSEPEPPASAR            |                    | S533           | 0.1827047  | 0.68621561 | 0.57200583 |
| P51116 | FXR2     | AGYSTDESSSSHLATR                           |                    | S410           | 0.19885215 | 0.67775564 | 0.58169594 |
| P51116 | FXR2     | RTGGPAYGPPSDVSTASETESEK                    |                    | S453           | 0.23576442 | 1.4067027  | 1.6080317  |
| P51116 | FXR2     | TGGPAYGPPSDVSTASETESEK                     |                    | S453           | 0.24518721 | 0.82166733 | 0.61377267 |
| P51116 | FXR2     | TGGSISGRDQPVTVADYISR                       |                    | S601,S603      | 0.54457521 | 1.2832397  | 0.79229018 |
| P51116 | FXR2     | TGGSISGRDQPVTVADYISR                       |                    | S601           | 0.70077908 | 0.91866801 | 0.87594502 |
| P06241 | FYN      | LIEDNEYTR                                  |                    | Y420           | 0.00584308 | 0.44968892 | 0.31900981 |
| Q9UM11 | FZR1     | RSSPDDGNDVSPYSLSPVSNK                      |                    | S137           | 0.13540221 | 0.78060201 | 0.5475768  |
| Q13283 | G3BP1    | YQDEVFVGFTPEPQEESEEEVEEPEER                |                    | S149           | 0.15160766 | 1.66611018 | 0.55686437 |
| Q13283 | G3BP1    | SSSPAPADIAQTVQEDLR                         |                    | S232           | 0.40522286 | 0.93425606 | 0.7160132  |
| Q9UN86 | G3BP2    | STTPPPAPEVSLPQEPK                          |                    | S225           | 0.47990499 | 0.74150902 | 0.75569707 |
| Q9UN86 | G3BP2    | YEDEVFGDSEPELDEESEDEVEEEQEER               |                    | S149           | 0.49114792 | 0.87247536 | 0.76263004 |
| Q9UN86 | G3BP2    | STTPPPAPEVSLPQEPK                          |                    | T227           | 0.51057434 | 0.77689405 | 0.77147476 |
| Q14C86 | GAPVD1   | SRSSDIVSSVR                                |                    | S902           | 0.01245809 | 1.67313713 | 0.39919401 |
| Q14C86 | GAPVD1   | SSDIVSSVR                                  |                    | S902           | 0.07170995 | 1.4451127  | 0.49571338 |
| Q14C86 | GAPVD1   | LQELESCEGLGSDSDTDVTR                       |                    | S746           | 0.09036455 | 0.64811447 | 0.51018936 |
| Q14C86 | GAPVD1   | EVSSRPSTGLSVVSGISATSEDI PNK                |                    | S758,S761      | 0.29383306 | 1.55802609 | 0.6555018  |
| Q14C86 | GAPVD1   | DEALQNISADDLPDSASQAAHPQDSAFYSR             |                    | S1105          | 0.40276976 | 0.79680025 | 0.7160132  |
| Q86YP4 | GATAD2A  | RPPSPDIVILSDNEQPSSPR                       |                    | S100,S114      | 0.12995992 | 0.59300477 | 0.54344847 |
| Q86YP4 | GATAD2A  | RPPSPDIVILSDNEQPSSPR                       |                    | S100,S107,S113 | 0.67622617 | 1.30069957 | 0.86185127 |
| Q8WXI9 | GATAD2B  | GRLTPSPDIVILSDNEASSPR                      |                    | T120,S135      | 0.28642058 | 1.25861899 | 0.65007167 |
| Q92538 | GBF1     | AASSSPGSPVASSPSR                           |                    | S1789          | 0.02229595 | 0.68632554 | 0.41830815 |
| Q92538 | GBF1     | EDLTDLEQPGSPGYSTATPEGSSSELGVPEQDQLQEGTHVEK |                    | S314           | 0.03205716 | 1.93804208 | 0.43874459 |
| Q92538 | GBF1     | GYTSDSEVYTDHGRPGK                          |                    | T1317          | 0.06766605 | 1.37675507 | 0.49083932 |
| Q92538 | GBF1     | GYTSDSEVYTDHGRPGK                          |                    | S1318          | 0.14899999 | 1.26261937 | 0.55352644 |
| Q92538 | GBF1     | ADAPDAGAQSDELSYPHQNDVSLDR                  |                    | S1298          | 0.151828   | 1.21364796 | 0.55686437 |
| P16383 | GCFC2    | RESEDDPESEPDDEK                            |                    | S180           | 0.30817404 | 1.27106537 | 0.66139614 |
| P16383 | GCFC2    | RESEDDPESEPDDEK                            |                    | S174,S180      | 0.57463111 | 1.1104562  | 0.81432655 |
| P48506 | GCLC     | GLLSQGSPLSWEETK                            |                    | S8             | 0.72273606 | 0.912843   | 0.89157396 |
| Q9BZD3 | GCOM2    | VSSQAEDTSSSFDNLFIDR                        |                    | S179           | 0.4654247  | 0.65885785 | 0.74679609 |
| Q8TEQ6 | GEMIN5   | ENSGPVENGVSQDEGEEQAREPELPCGLAPAVSR         |                    | S778           | 0.29722696 | 0.82021313 | 0.65749804 |
| Q8TEQ6 | GEMIN5   | ENSGPVENGVSQDEGEEQAR                       |                    | S778           | 0.34020724 | 0.70237934 | 0.67842858 |
| Q06210 | GFPT1    | VDSITCLFVVEEK                              |                    | S261           | 0.87503665 | 1.04220859 | 0.95556965 |
| Q94808 | GFPT2    | RLDSSACLHAVGDK                             |                    | S244           | 0.54635969 | 1.12648221 | 0.7933521  |
| Q9H3C7 | GGNBP2   | EDDGDSCEVCWANSEENDTK                       |                    | S515           | 0.94623463 | 1.00681706 | 0.98213577 |
| O75420 | GIGYF1   | SLSPVDSGR                                  |                    | S638           | 0.59259978 | 0.97188546 | 0.82284423 |
| O75420 | GIGYF1   | GIQLSPGVSSAGPPGDLLEDEGLK                   |                    | S406           | 0.75678875 | 1.04346146 | 0.90833103 |
| Q6Y7W6 | GIGYF2   | EPIPEEQEMDFRPVDEGEECSDEGSHNEEAK            |                    | S335           | 0.1587362  | 0.82758057 | 0.55688781 |
| Q6Y7W6 | GIGYF2   | WRPHSPDGPR                                 |                    | S236           | 0.55342278 | 1.11066826 | 0.79781836 |
| Q6Y7W6 | GIGYF2   | VGVEASEETPQTSSSARPPTPSDHQSEASQFER          |                    | T382           | 0.75180287 | 1.07678374 | 0.90658581 |
| Q9Y2X7 | GIT1     | SLSSPTDNLLESLR                             |                    | S362           | 0.15532434 | 1.65425459 | 0.55688781 |
| Q9Y2X7 | GIT1     | SQSDLDQHDHYDSVASDEDTDQEPLR                 |                    | S388           | 0.38573051 | 1.40186369 | 0.71060254 |
| Q9Y2X7 | GIT1     | HGSGADSDYENTQSGDPLLGLEGK                   |                    | S596           | 0.68496787 | 1.04665045 | 0.86760918 |
| P17302 | GJA1     | SDPYHATSGALSPAK                            |                    | S255           | 0.67007653 | 1.16344356 | 0.86045622 |
| P10070 | GLI2     | RSSEASPLGAGRPHNASSADSYDPISTDASR            |                    | S835           | 0.44782547 | 1.33239685 | 0.73811209 |
| P10075 | GLI4     | SPGSAQDEPAGGAGALR                          |                    | S86            | 0.67694486 | 0.9447403  | 0.86220343 |
| P49915 | GMPS     | TLNMTTSPEEK                                |                    | S332           | 0.48604625 | 0.91036717 | 0.75953527 |
| P36915 | GNL1     | EEQTDTSDEGVSITHHIR                         |                    | S51            | 0.15640892 | 1.29475983 | 0.55688781 |
| Q13439 | GOLGA4   | EENPESDGEPPVVEDGTSVK                       |                    | S266           | 0.33958066 | 0.88348734 | 0.67842858 |
| Q13439 | GOLGA4   | VPSVESLFR                                  |                    | S71            | 0.37043936 | 1.28590137 | 0.70105255 |
| Q13439 | GOLGA4   | TSSFTEQLDEGTPNR                            |                    | S41            | 0.5427477  | 0.92234963 | 0.79120965 |
| Q9NW75 | GPATCH2  | QGDDEQSDWFYEK                              |                    | S284           | 0.06724805 | 0.51517113 | 0.49083932 |
| Q9NWQ4 | GPATCH2L | SPSSVELWR                                  |                    | S447           | 0.08155128 | 0.6877861  | 0.50397847 |
| Q5T3I0 | GPATCH4  | DLESKSDDDNQSGK                             |                    | S130           | 0.30039458 | 0.85457126 | 0.65817287 |
| Q9UKJ3 | GPATCH8  | GPKEPPGSGSPAPPR                            |                    | S738           | 0.18560739 | 1.18341592 | 0.57433231 |
| Q9UKJ3 | GPATCH8  | SQSPHYFR                                   |                    | S1035          | 0.19103394 | 1.35616206 | 0.57584619 |
| Q9UKJ3 | GPATCH8  | KPSVSEEVQATPNK                             |                    | S1107          | 0.4983338  | 0.88939625 | 0.76446134 |
| Q9UKJ3 | GPATCH8  | RSWGHESPEER                                |                    | S1014          | 0.80356349 | 1.16210952 | 0.92467356 |
| Q9NPB8 | GPCPD1   | LTLLEGLEDDDDRVSPVTLHK                      |                    | S175           | 0.10042468 | 1.64313294 | 0.52414255 |

|        |          |                                  |             |            |            |            |
|--------|----------|----------------------------------|-------------|------------|------------|------------|
| P06744 | GPI      | SNTPIVLVDGK                      | T109        | 0.93512613 | 0.98710885 | 0.97652346 |
| Q9HCN4 | GPN1     | GTLDEEEEDSDTDDIDHR               | S338        | 0.26196965 | 0.91502809 | 0.63004432 |
| Q86SQ4 | GPR126   | NSHTDNVSYEHFSNK                  | S1199       | 0.09581263 | 0.46068595 | 0.51670111 |
| Q8NFJ5 | GPRC5A   | AHAWVSPYK                        | S345        | 0.93268112 | 0.98422713 | 0.97583851 |
| Q722K8 | GPRIN1   | SPSGAGEGASCSDGPR                 | S73         | 0.00487996 | 0.31699349 | 0.31681062 |
| Q13098 | GPS1     | EGSQGELTPANSQSR                  | T479        | 0.04709425 | 0.56190432 | 0.45625798 |
| Q13098 | GPS1     | EGSQGELTPANSQSR                  | S474        | 0.22742689 | 0.76450703 | 0.6080317  |
| Q96CP6 | GRAMD1A  | RPLSWR                           | S560        | 0.04476256 | 0.12789113 | 0.45441331 |
| Q3KR37 | GRAMD1B  | SSIETKPDASPQLPK                  | S274        | 0.0081448  | 0.18988827 | 0.35749468 |
| Q4V328 | GRIPAP1  | SLSSSPQAQPPRAELSDVEEVALFQR       | S690        | 0.3884521  | 1.7840632  | 0.71060254 |
| Q14687 | GSE1     | GPPTQELDRDEEEEEDEDEDGEDEEEVPK    | S1101       | 0.5965374  | 0.89063847 | 0.8234368  |
| P49840 | GSK3A    | GEPNVSYICSR                      | Y279        | 0.17953689 | 0.81351981 | 0.56916727 |
| P49840 | GSK3A    | TSSFAEPGGGGGGGGGGPGGSASGPGGTGGGK | T19         | 0.21005326 | 0.57564165 | 0.59639193 |
| P35269 | GTF2F1   | LDTGPQSLSGK                      | S433        | 0.02932837 | 1.3591716  | 0.43032203 |
| P35269 | GTF2F1   | GNSRPGTSPAEGGSTSSTLR             | T389        | 0.26993642 | 1.80022574 | 0.63502787 |
| P35269 | GTF2F1   | TTPNSGDVQVTEDAVR                 | T446        | 0.38517528 | 1.2641945  | 0.71060254 |
| P35269 | GTF2F1   | GNSRPGTSPAEGGSTSSTLR             | S385        | 0.56638602 | 0.79597585 | 0.81040028 |
| P35269 | GTF2F1   | GNSRPGTSPAEGGSTSSTLR             | T389,S385   | 0.63830539 | 0.88088597 | 0.84338453 |
| P78347 | GTF2I    | SILSPGGSCGPIK                    | S210        | 0.43707443 | 0.75955838 | 0.73338954 |
| Q12789 | GTF3C1   | TSQPPVQGEAEEDSQGK                | S739        | 0.08498251 | 1.35548842 | 0.50397847 |
| Q12789 | GTF3C1   | RASWASENETDAEGTQMTPAK            | S1865,S1868 | 0.12160648 | 0.73139378 | 0.53786538 |
| Q12789 | GTF3C1   | KNSSTDQGSDEEGSLQK                | S1062,S1068 | 0.22272941 | 0.82699847 | 0.6080317  |
| Q12789 | GTF3C1   | KNSSTDQGSDEEGSLQK                | S1062       | 0.22853949 | 0.90032576 | 0.6080317  |
| Q12789 | GTF3C1   | KNSSTDQGSDEEGSLQK                | S1063,S1068 | 0.26881001 | 0.78299562 | 0.63502787 |
| Q12789 | GTF3C1   | RASWASENETDAEGTQMTPAK            | S1865       | 0.30431428 | 0.6638095  | 0.6612054  |
| Q12789 | GTF3C1   | EDPQARPLEGSSSEDSPPPEGQAPPSHSPR   | S1856       | 0.31197602 | 1.21150424 | 0.66201195 |
| Q12789 | GTF3C1   | AGVRRPSSSGSAWEACSEAPSK           | S848        | 0.31675117 | 0.6336116  | 0.6655833  |
| Q12789 | GTF3C1   | NSSTDQGSDEEGSLQK                 | S1068       | 0.34007689 | 1.37098674 | 0.67842858 |
| Q12789 | GTF3C1   | NSSTDQGSDEEGSLQK                 | S1063,S1068 | 0.67324838 | 1.22712453 | 0.86131187 |
| Q12789 | GTF3C1   | DGSLEDDDEDEDDLEDEGVGGK           | S1611       | 0.86088183 | 0.97679183 | 0.95107454 |
| Q12789 | GTF3C1   | EDPQARPLEGSSSEDSPPPEGQAPPSHSPR   | S1854       | 0.8670837  | 0.98383085 | 0.95376438 |
| Q8WUA4 | GTF3C2   | DLDRPESQSPK                      | S167        | 0.11809969 | 1.49362197 | 0.53608376 |
| Q8WUA4 | GTF3C2   | DLDRPESQSPK                      | S165        | 0.24424975 | 1.21907646 | 0.61377267 |
| Q9Y5Q9 | GTF3C3   | GKLSAEENPDDSEVPSSSGINSTK         | S43         | 0.72356249 | 0.9549133  | 0.89157396 |
| Q9UKN8 | GTF3C4   | ILLVDSPGMGADDEQEEGTSSK           | S611        | 0.73416444 | 0.94007491 | 0.89630001 |
| Q9NVZ3 | GTSE1    | LVDVSPDR                         | S575        | 0.28147963 | 0.49949121 | 0.6455595  |
| Q9H116 | GZF1     | SFLVIVDGSFK                      | S613        | 0.48761106 | 1.46143716 | 0.75953527 |
| P49590 | HARS2    | DLSQHMVVR                        | S67         | 0.00539263 | 0.72011508 | 0.31900981 |
| O14929 | HAT1     | LISPYK                           | S361        | 0.04567101 | 0.56894886 | 0.45625798 |
| Q724H7 | HAUS6    | AVLSDSPQLSEGG                    | S552        | 0.04805038 | 0.68295196 | 0.45625798 |
| Q724H7 | HAUS6    | TPENLITEIR                       | T584        | 0.18622408 | 0.51959878 | 0.57474321 |
| Q99871 | HAUS7    | GGDDYSEDEGDSSVSR                 | S26         | 0.11475043 | 0.78025517 | 0.53343618 |
| Q13547 | HDAC1    | MLPHAPGVQMQAIPEDAIPESGDEDEDPPDK  | S393        | 0.86934446 | 1.11810921 | 0.95442216 |
| Q92769 | HDAC2    | MLPHAPGVQMQAIPEDAVHEDSGDEDEDPPDK | S394        | 0.65518076 | 0.80101303 | 0.85263945 |
| O15379 | HDAC3    | GPEENYSRPEAPNEFYDGDHNDKESDVEI    | S424        | 0.53371914 | 0.85064212 | 0.85095027 |
| P56524 | HDAC4    | QEIPIESDEEAEPPREVEPGQR           | S565        | 0.40166317 | 0.96301333 | 0.7160132  |
| Q8WU14 | HDAC7    | AQSSPAAPASLSAPEPASQAR            | S486        | 0.66028589 | 0.79036751 | 0.85521798 |
| P51858 | HDGF     | AGDLLSDSPK                       | S165        | 0.23153947 | 1.16815827 | 0.6080317  |
| P51858 | HDGF     | SCVEEPEPEAAEGDGDK                | S107        | 0.54544057 | 0.80619468 | 0.79285559 |
| Q724V5 | HDGFRP2  | EGPDLDRPGSDRQER                  | S652        | 0.10399637 | 1.27833669 | 0.52476522 |
| Q724V5 | HDGFRP2  | ADSDGAKPEPVAMAR                  | S240        | 0.50619461 | 0.80133432 | 0.76766855 |
| Q724V5 | HDGFRP2  | ARGDSEALDEES                     | S664        | 0.88793173 | 0.98969072 | 0.95935633 |
| Q00341 | HDLBP    | VATLNSEEEEDPPPTYK                | S31         | 0.79275369 | 0.97115083 | 0.9228136  |
| Q6AI08 | HEATR6   | IQQGEIEEKESSGEIEAAPVTGTGR        | S337        | 0.17510056 | 0.76219439 | 0.56898248 |
| Q6AI08 | HEATR6   | APAGPSLEETSVSPPK                 | S643        | 0.96644596 | 0.99410886 | 0.99410886 |
| Q9ULT8 | HECTD1   | VSTLAGPSSDDENEESKPEK             | S632        | 0.11936951 | 0.82626047 | 0.53759949 |
| Q9ULT8 | HECTD1   | VSTLAGPSSDDENEESKPEK             | S631        | 0.14272928 | 0.80082759 | 0.55222534 |
| P42694 | HELZ     | RISSSSQPCSEEVSTPQDSLAQCK         | S1765       | 0.40197186 | 1.46389577 | 0.7160132  |
| Q15751 | HERC1    | SRSESDLSQPESDEEGYALSGR           | S1510       | 0.69444306 | 1.09529122 | 0.87245997 |
| Q95714 | HERC2    | IRAEEDLAAVPLASDNEEEDEK           | S2928       | 0.4732564  | 1.37139214 | 0.75075773 |
| Q95714 | HERC2    | IGNEESDLEACILPHSPINVDK           | S1577       | 0.58168935 | 1.23515731 | 0.81832936 |
| Q96MH2 | HEXIM2   | TQSPGGCSAEAVLAR                  | S76         | 0.33335058 | 0.9443787  | 0.67622969 |
| Q96MH2 | HEXIM2   | TSGAPGSPQTPPER                   | S29         | 0.98259021 | 1.00311136 | 0.99355276 |
| Q8IV36 | HID1     | SLEPEPQQSLEDGSPAK                | S653        | 0.00171973 | 0.60982775 | 0.27314524 |
| Q8IV36 | HID1     | TGSQEGTSMEGSRPAAPAEPTLTK         | S593        | 0.03583453 | 2.12591485 | 0.43916474 |
| Q9BW71 | HIRIP3   | NGVAAEVSPAK                      | S125        | 0.19661941 | 0.82620318 | 0.58169594 |
| Q9BW71 | HIRIP3   | ESEQESEIEILAQK                   | S227        | 0.88672548 | 1.03708011 | 0.95863404 |
| P16403 | HIST1H1C | ASGPPVSELITK                     | S36         | 0.18269082 | 0.68385493 | 0.57200583 |
| P10412 | HIST1H1E | SETAPAAPAAPAPAEK                 | S2          | 0.40854536 | 0.92244315 | 0.71694309 |
| Q8NCD3 | HJURP    | GGPASPGGQLGLETR                  | S473        | 0.84697021 | 1.0347493  | 0.9453218  |
| Q9NP66 | HMG20A   | SPLTGYVR                         | S105        | 0.02250385 | 0.71060389 | 0.41830815 |
| P17096 | HMGA1    | EEEEGISQESSEEEQ                  | S103        | 0.79740348 | 0.94315992 | 0.92373279 |
| P52926 | HMGA2    | QQQEPTGEPSPK                     | S44         | 0.58774535 | 0.91194823 | 0.82150771 |
| Q01581 | HMGCS1   | RPTPNDTDLDEGVGLVHSNIATEHIPSAPK   | S495        | 0.4330978  | 1.89340969 | 0.73152094 |
| P05114 | HMGN1    | TEESPASDEAGEK                    | S86,S89     | 0.17604615 | 1.79889462 | 0.56898248 |
| Q9UGU5 | HMGXB4   | ASSVGLSPQK                       | S497        | 0.1129592  | 0.63300971 | 0.53343618 |
| Q9UGU5 | HMGXB4   | SPPTTMLLPASPAK                   | S502,S512   | 0.45759447 | 0.77191018 | 0.74096613 |
| P09601 | HMOX1    | DQSPSRAPGLR                      | S229        | 0.18345632 | 0.73283898 | 0.57261319 |
| Q9UK76 | HN1      | SSGGREDLESSGLQR                  | S71         | 0.01730059 | 0.58053104 | 0.41830815 |
| Q9UK76 | HN1      | NSSEASSGDFLDLK                   | S87         | 0.17529836 | 0.79415002 | 0.56898248 |
| Q9UK76 | HN1      | RNSSEASSGDFLDLK                  | S88         | 0.23659533 | 0.82636364 | 0.6080317  |

|        |               |                                     |           |            |            |             |
|--------|---------------|-------------------------------------|-----------|------------|------------|-------------|
| Q9UK76 | HN1           | RNSSEASSGDFLDLK                     | S87       | 0.2563891  | 0.86787975 | 0.6256271   |
| Q9H910 | HN1L          | TSDFGSPVATSR                        | S97       | 0.37188254 | 0.78723414 | 0.7012243   |
| Q13151 | HNRNPA0       | EDIYGGGGGGGS                        | S188      | 0.32737945 | 0.84918532 | 0.67305029  |
| P09651 | HNRNPA1       | SESPKEPEQLR                         | S6        | 0.10267708 | 1.30044444 | 0.52414255  |
| P09651 | HNRNPA1       | EDSQRPAGHLTVK                       | S95       | 0.14437813 | 1.74725994 | 0.55352644  |
| P09651 | HNRNPA1       | NQGGYGGSSSSSYGSGR                   | S363      | 0.15381957 | 0.59439073 | 0.55688781  |
| P09651 | HNRNPA1       | NQGGYGGSSSSSYGSGR                   | S368      | 0.22931804 | 0.79917139 | 0.6080317   |
| P09651 | HNRNPA1       | NQGGYGGSSSSSYGSGR                   | S365      | 0.46080261 | 0.85404057 | 0.74263181  |
| P22626 | HNRNPA2B1     | GGNFGFGDSR                          | S212      | 0.12501485 | 0.59987786 | 0.5401424   |
| P22626 | HNRNPA2B1     | FGFDGNGYGGGPGGNFGGSPGYGGGR          | S259      | 0.33817131 | 0.68648931 | 0.67736506  |
| P51991 | HNRNPA3       | SSGSPYGGYGGSSGGYGS                  | S358      | 0.95126177 | 1.01260193 | 0.98285966  |
| P07910 | HNRNPC        | MESEGGADDSAEEGDLLDDDDNEDRGDDQLELIK  | S253      | 0.19041102 | 2.35653432 | 0.57584619  |
| P07910 | HNRNPC        | MESEGGADDSAEEGDLLDDDDNEDRGDDQLELIK  | S260      | 0.24985662 | 2.08471653 | 0.61811355  |
| P07910 | HNRNPC        | MESEGGADDSAEEGDLLDDDDNEDR           | S260      | 0.25212683 | 0.85328443 | 0.61962985  |
| P07910 | HNRNPC        | EAEEGEDDRDSANGEDDS                  | S299      | 0.96299056 | 0.99353588 | 0.56359866  |
| Q14103 | HNRNPD        | NEEDEGHSSNPRHSEAAATQR               | S80,S87   | 0.51862505 | 0.94375457 | 0.77588784  |
| O14979 | HNRNPD        | VFVGGSLPDTSEEQIK                    | S241      | 0.62894526 | 0.87760277 | 0.83899389  |
| P52597 | HNRNPF        | HSGPNSADSANDFVFR                    | S104      | 0.10631823 | 1.53651325 | 0.52609195  |
| P31943 | HNRNPH1       | HTGPNSPDTANDGFVR                    | S104      | 0.51073242 | 1.06805075 | 0.77147476  |
| P61978 | HNRNPK        | RDYDDMSPR                           | S284      | 0.75610698 | 1.08203445 | 0.90833103  |
| P61978 | HNRNPK        | DYDDMSPR                            | S284      | 0.79513516 | 0.96302383 | 0.92631025  |
| Q8WVV9 | HNRNPL        | TEEGEIDYSAEEGENRR                   | S35       | 0.87275778 | 1.04341069 | 0.95542841  |
| P52272 | HNRNPM        | MGANSLER                            | S575      | 0.78494078 | 0.93451142 | 0.92039443  |
| Q00839 | HNRNPU        | LQAALDDEEAGRPAMEPGNGSLDLGGDSAGR     | S59       | 0.33294511 | 1.21559102 | 0.67622969  |
| Q1KMD3 | HNRNPUL2      | SKSPLPPEEAK                         | S228      | 0.30783373 | 1.51148742 | 0.503939614 |
| Q1KMD3 | HNRNPUL2      | EEDPEERSGDETPGSEVPDGK               | S161      | 0.91473035 | 1.01193756 | 0.96814115  |
| Q1KMD3 | HNRNPUL2      | SPLPPEEAK                           | S228      | 0.97049012 | 0.98235927 | 0.98915891  |
| Q9NSC5 | HOMER3        | SQSADAPGPTER                        | S159      | 0.07754857 | 1.65559048 | 0.50397847  |
| Q5SSJ5 | HP1BP3        | NRSSAVDPEPVQK                       | S249      | 0.05998582 | 0.46603179 | 0.47702638  |
| Q9UPZ3 | HP5           | RGSSQSEDECSLHSQTLSEDER              | S461      | 0.77610397 | 0.96119006 | 0.91412088  |
| P35367 | HRH1          | SGSNTGLDVIK                         | S380      | 0.17554538 | 0.88193209 | 0.56898248  |
| Q00613 | HSF1          | GHTDTEGRPPSPPTSTPEK                 | S363      | 0.03395672 | 1.90188104 | 0.43874459  |
| P07900 | HSP90AA1      | ESEDKPEIEDVGSDEEEEEK                | S263      | 0.43388376 | 0.90420561 | 0.73152094  |
| P07900 | HSP90AA1      | ESEDKPEIEDVGSDEEEEEK                | S263      | 0.70134894 | 1.08499217 | 0.87594502  |
| P07900 | HSP90AA1      | ESEDKPEIEDVGSDEEEEEK                | S252      | 0.87444501 | 1.03480783 | 0.95556965  |
| P07900 | HSP90AA1      | EKESEDKPEIEDVGSDEEEEEK              | S252,S263 | 0.94980629 | 1.02465483 | 0.98215506  |
| P08238 | HSP90AB1      | IEDVGSDEEDDSGK                      | S255      | 0.17768158 | 0.88950276 | 0.56898248  |
| P08238 | HSP90AB1      | IEDVGSDEEDDSGKDK                    | S255      | 0.2458055  | 1.20841323 | 0.61377267  |
| P08238 | HSP90AB1      | IEDVGSDEEDDSGK                      | S255,S261 | 0.33287993 | 1.37222799 | 0.67622969  |
| P08238 | HSP90AB1      | EISDDAEEEEK                         | S226      | 0.60727485 | 0.95622352 | 0.82983763  |
| P08238 | HSP90AB1      | DDEEKPKIEDVGSDEEDDSGK               | S255      | 0.98567449 | 1.01101935 | 0.9949188   |
| P14625 | HSP90B1       | EESDDEAAVEEEEEEK                    | S306      | 0.00179973 | 2.64200408 | 0.27314524  |
| P14625 | HSP90B1       | EKEESDDEAAVEEEEEEK                  | S306      | 0.01455253 | 3.59735481 | 0.41362115  |
| P08107 | HSPA1A,HSPA1B | GGSGSGPTIEVD                        | S633      | 0.49876441 | 0.80222511 | 0.76446134  |
| P04792 | HSPB1         | QLSSGVSEIR                          | S82       | 0.29909895 | 1.16390424 | 0.65817287  |
| P04792 | HSPB1         | GPSWDFPR                            | S15       | 0.37088204 | 0.59852476 | 0.70105255  |
| Q9NZL4 | HSPBP1        | LLQTCFSSPADDSMDR                    | S354      | 0.80399485 | 0.94225806 | 0.92483575  |
| P10809 | HSPD1         | TVIIQSWGSPK                         | S70       | 0.64014937 | 1.06458767 | 0.84405606  |
| Q92598 | HSPH1         | NVQQDNSEAGTQPQVQTDAAQTSQSPPELTSEENK | S557      | 0.19650341 | 0.82820413 | 0.58169594  |
| Q92598 | HSPH1         | IESPKLER                            | S809      | 0.65197512 | 1.21720111 | 0.805262    |
| O43719 | HTATSF1       | LFEESSDDEDEDADGK                    | S676      | 0.12522849 | 1.23352319 | 0.54014242  |
| O43719 | HTATSF1       | LFEDDSDNEK                          | S702      | 0.24231661 | 1.21955971 | 0.61278278  |
| O43719 | HTATSF1       | VFDDESDEKDEEYADEK                   | S642      | 0.26928976 | 1.30414747 | 0.63502787  |
| O43719 | HTATSF1       | LFDEEESSEK                          | S713      | 0.62492705 | 1.0493924  | 0.8384421   |
| O43719 | HTATSF1       | LFDEEESSEK                          | S714      | 0.64360709 | 0.92525253 | 0.84760107  |
| O43719 | HTATSF1       | ESEDNLNKESEEVGPTK                   | S529      | 0.8434216  | 0.96259407 | 0.94383208  |
| O43719 | HTATSF1       | NDCEENGLAKESDNLNK                   | S521      | 0.99457803 | 1.00063464 | 0.99772632  |
| Q7Z627 | HUWE1         | GNDTPLALESTNTEK                     | T1722     | 0.00140258 | 0.36800276 | 0.27314524  |
| Q7Z627 | HUWE1         | EESPMVDVQPSAQTQSIASDGTQPQGEK        | S3816     | 0.01916845 | 0.65577295 | 0.41830815  |
| Q7Z627 | HUWE1         | AGSSTPGDAPPAVAEVQGR                 | S2887     | 0.12557039 | 0.71699264 | 0.5403576   |
| Q7Z627 | HUWE1         | REESPMVDVQPSAQTQSIASDGTQPQGEK       | T3822     | 0.34666315 | 0.85596959 | 0.68145427  |
| Q7Z627 | HUWE1         | GSGTASDDEFENLR                      | S1907     | 0.39377481 | 1.10611205 | 0.71376865  |
| Q7Z627 | HUWE1         | DGGSGNSTIIVSR                       | S2362     | 0.45023362 | 0.8684154  | 0.73811209  |
| Q7Z627 | HUWE1         | REESPMVDVQPSAQTQSIASDGTQPQGEK       | S3816     | 0.47193435 | 0.85224439 | 0.75004241  |
| Q7Z627 | HUWE1         | AESPEEVAER                          | S1395     | 0.47259216 | 0.91648189 | 0.75074143  |
| Q7Z627 | HUWE1         | AQCETLSPDGLPEEQPQTTK                | S3662     | 0.67208784 | 0.90026895 | 0.86092132  |
| Q7Z627 | HUWE1         | SGEDESQEDVLMDEAPSNLSQASTLQANR       | S2377     | 0.9560729  | 1.02288595 | 0.98388755  |
| Q9P2D0 | IBTK          | DLQSPDFTTFHSDK                      | S1045     | 0.11069197 | 1.37324703 | 0.53343618  |
| P48551 | IFNAR2        | DSPQQLLELGGPCER                     | S384      | 0.05127377 | 0.52356257 | 0.45652016  |
| P15260 | IFNGR1        | ESSPLSSNQSEPSGIALNSYHSR             | S399      | 0.03918562 | 2.0304826  | 0.44899888  |
| Q9Y6M1 | IGF2BP2       | ISYIPDEEVSSPPQR                     | S164      | 0.54719316 | 0.88317679 | 0.7933521   |
| Q9Y6M1 | IGF2BP2       | ISYIPDEEVSSPPQR                     | S162      | 0.92618975 | 1.015693   | 0.97279582  |
| P11717 | IGF2R         | LVSFHDSDDEDLHLI                     | S2484     | 0.1262998  | 2.38320084 | 0.5403576   |
| P11717 | IGF2R         | ALSSLHGDDQDSEDEVLTIPVVK             | S2409     | 0.18849858 | 1.73285092 | 0.57474321  |
| P40189 | IL6ST         | QNCQSHESSPDISHFER                   | S820      | 0.10850053 | 0.60883126 | 0.5330611   |
| Q12906 | ILF3          | VLQDMGLPTGAERDSSK                   | S476      | 0.53550266 | 0.75191961 | 0.78666672  |
| Q8NI35 | INADL         | LFDDASVDEPR                         | S645      | 0.12291177 | 0.57376992 | 0.5389189   |
| Q8NI35 | INADL         | VPDSENELK                           | S522      | 0.16284825 | 0.77358642 | 0.55797736  |
| Q9NQ57 | INCENP        | TLSPPTASATAPTSQIGPSTDEESTPKK        | T213,S214 | 0.00144412 | 0.35045836 | 0.27314524  |
| Q9NQ57 | INCENP        | TLSPPTASATAPTSQIGPSTDEESTPK         | T195,T219 | 0.00305389 | 0.49469815 | 0.27314524  |
| Q9NQ57 | INCENP        | IAQVSPGPR                           | S263      | 0.00836055 | 0.57561204 | 0.35749468  |

|        |          |                                      |                |            |            |            |
|--------|----------|--------------------------------------|----------------|------------|------------|------------|
| Q9NQ57 | INCENP   | TLSPTPASATAPTSQIGTISDEESTPKK         | T195,T219,S218 | 0.14703497 | 0.69249402 | 0.55352644 |
| Q27J81 | INF2     | GARPPAAGPGGDEDEEEDTAPESALDTSCLK      | S1188          | 0.44648961 | 1.09779951 | 0.73811209 |
| Q27J81 | INF2     | GARPPAAGPGGDEDEEEDTAPESALDTSCLK      | T1179,S1188    | 0.46415809 | 1.19638243 | 0.74559723 |
| Q27J81 | INF2     | GARPPAAGPGGDEDEEEDTAPESALDTSCLK      | T1179          | 0.50126577 | 1.08586348 | 0.76563097 |
| Q8WYH8 | ING5     | MEGSDFFESSGGR                        | S118           | 0.00325173 | 0.68170251 | 0.27314524 |
| Q8N201 | INTS1    | LSPEQEQQLMPR                         | S307           | 0.38404339 | 0.75673186 | 0.70957373 |
| Q8N201 | INTS1    | SSPEQPIGQGR                          | S1327          | 0.85309615 | 0.98915401 | 0.94776231 |
| Q9NVR2 | INTS10   | STQIENHQHQAQDTSDLMSPSK               | S231           | 0.0351652  | 0.52113441 | 0.43874459 |
| Q68E01 | INTS3    | DESCYDNAEAAFSDDDEEDLNSK              | S537           | 0.4376234  | 0.80123002 | 0.73338954 |
| Q15051 | IQCB1    | KLGEESGDEIDVPK                       | S572           | 0.57156462 | 0.92433271 | 0.81432655 |
| Q6DN90 | IQSEC1   | MQFSFEGPEK                           | S180           | 0.0817744  | 1.26595818 | 0.50397847 |
| Q6DN90 | IQSEC1   | NSWDSPAFNSDVIR                       | S512           | 0.240735   | 0.73820462 | 0.61232743 |
| Q5JU85 | IQSEC2   | ETRHSHWDSAPFNNDVVQR                  | T728           | 0.53719719 | 1.25838368 | 0.78705986 |
| Q8IU81 | IRF2BP1  | NVAEALGHSPK                          | S436           | 0.06331078 | 1.22765363 | 0.47702638 |
| Q8IU81 | IRF2BP1  | SPGPPALK                             | S66            | 0.38282595 | 0.92660551 | 0.70884547 |
| Q8IU81 | IRF2BP1  | AGGASPAASSTAQPPTQHR                  | S453           | 0.87073051 | 0.96937574 | 0.9551058  |
| Q7Z5L9 | IRF2BP2  | NSNSPPSPSSMNQR                       | S457,S462      | 0.03820657 | 0.67876413 | 0.44815912 |
| Q7Z5L9 | IRF2BP2  | NSNSPPSPSSMNQR                       | S457,S460      | 0.20188015 | 0.69330854 | 0.58254318 |
| Q7Z5L9 | IRF2BP2  | RPASVSSAAVEHEQR                      | S240           | 0.21141843 | 0.66551027 | 0.59863503 |
| Q7Z5L9 | IRF2BP2  | LEEPPELNRQSPNPR                      | S175           | 0.34398735 | 0.86391913 | 0.67929613 |
| Q7Z5L9 | IRF2BP2  | NSNSPPSPSSMNQR                       | S460           | 0.35949116 | 0.91298291 | 0.69128283 |
| Q7Z5L9 | IRF2BP2  | RKPSPEPEGEVGGPK                      | S360           | 0.62766781 | 1.15479116 | 0.83899389 |
| Q9H1B7 | IRF2BPL  | ASPEPPDPAEGALK                       | S547           | 0.37692444 | 1.11950791 | 0.70397848 |
| Q9H1B7 | IRF2BPL  | KASPEPPDPAEGALK                      | S547           | 0.71502978 | 1.05965163 | 0.88594092 |
| Q9H1B7 | IRF2BPL  | NSSSPVSPASVPGQR                      | S659           | 0.85377299 | 0.96393147 | 0.94798805 |
| P35568 | IRS1     | HSSSETFSSTPSATR                      | S1101          | 0.42860144 | 0.82608584 | 0.72966058 |
| P35568 | IRS1     | ASSDGEGTMSRPASVDGSPVSPSTNR           | T351,S329      | 0.48053962 | 0.86418919 | 0.75582586 |
| P35568 | IRS1     | VNLSPNR                              | S1078          | 0.54257958 | 0.87681347 | 0.79120965 |
| P35568 | IRS1     | RHSSETFSSTPSATR                      | S1100          | 0.67048595 | 1.09141532 | 0.86066105 |
| Q9Y4H2 | IRS2     | SNTPEJAIETPPAR                       | T520           | 0.16158828 | 1.17405347 | 0.55797736 |
| Q9Y4H2 | IRS2     | ASSPAESSPDSGYMR                      | S736           | 0.16793062 | 2.05045011 | 0.56312413 |
| Q9Y4H2 | IRS2     | HNSASVENSLR                          | S1174          | 0.25747149 | 0.65255593 | 0.62621067 |
| Q9Y4H2 | IRS2     | SSEGGVGVGGGGDEPPTSPR                 | S1203          | 0.60856159 | 1.10622075 | 0.8300539  |
| Q9Y4H2 | IRS2     | TYSLTPPAR                            | S577           | 0.63108092 | 0.85758987 | 0.8405143  |
| Q9Y4H2 | IRS2     | HNSASVENSLR                          | S1176          | 0.74223709 | 1.1074783  | 0.90061831 |
| Q969R8 | ITFG2    | DTGSPASEGPTDGSR                      | S220           | 0.10289433 | 1.34342245 | 0.5242131  |
| Q9NZM3 | ITSN2    | TVSPGVSPIHQGGQVVENLK                 | S884,S889      | 0.02597965 | 1.53492358 | 0.41830815 |
| Q965T2 | IWS1     | GPASDSETEADSR                        | S313           | 0.30928814 | 1.13210909 | 0.66139614 |
| Q965T2 | IWS1     | HPASDSEIEELQK                        | S157           | 0.6541893  | 0.86595954 | 0.85212857 |
| Q965T2 | IWS1     | AAVLSDSEDEEK                         | S398,S400      | 0.99199578 | 1.00455266 | 0.99691668 |
| Q8WYK2 | JD2      | TDSVKTEPESGNPLLEQLEK                 | T148           | 0.1189213  | 1.57295408 | 0.5734868  |
| Q15652 | JMJD1C   | TSPLVSNNEQGSTLR                      | S2053          | 0.47799835 | 0.82764968 | 0.75480345 |
| P05412 | JUN      | LASPELER                             | S73            | 0.02236889 | 1.7553614  | 0.41830815 |
| P05412 | JUN      | NSDLLTSPDVGLLK                       | S63            | 0.32838572 | 1.70703929 | 0.67305029 |
| P17275 | JUNB     | SRDATPPVSPINMEDQER                   | T255,S259      | 0.44908365 | 0.85473871 | 0.73811209 |
| O60229 | KALRN    | WLTSPVR                              | S1773          | 0.3056933  | 0.75569447 | 0.66139614 |
| Q14678 | KANK1    | SYSAGNASQLEQLSR                      | S325           | 0.15904065 | 0.67425323 | 0.55688781 |
| Q7Z3B3 | KANSL1   | LSPGTDSSNLGGVK                       | S249           | 0.45233915 | 0.89676325 | 0.73811209 |
| Q7Z3B3 | KANSL1   | TFPLAHSQAECEDQLDAQER                 | S1045          | 0.4935629  | 0.8942266  | 0.76351366 |
| O95251 | KAT7     | RNAGSSSDGTEDSDFSTDLEHTDSSSEDGTSR     | S10            | 0.10264708 | 0.42369732 | 0.52414255 |
| O95251 | KAT7     | SSGSETQEVDFDSR                       | S99            | 0.17226126 | 0.64662175 | 0.56561687 |
| O95251 | KAT7     | NTADHDESPRPTGNAPSSSEDIDISSPNVSHDESIK | T128,S124      | 0.86763628 | 1.03255833 | 0.95406748 |
| O60341 | KDM1A    | LPPPPQAPPEEENESEPEEPSGVEGAAFQSR      | S166           | 0.13513436 | 0.62862581 | 0.5475768  |
| O60341 | KDM1A    | KLPPPPQAPPEEENESEPEEPSGVEGAAFQSR     | S166           | 0.51698536 | 0.82359568 | 0.77480312 |
| Q9Y2K7 | KDM2A    | RYEDDGISDDEIEGK                      | S28            | 0.01873168 | 0.7077248  | 0.41830815 |
| Q9Y2K7 | KDM2A    | GDEEGLGEEEEEEEEEDDAAEEGGAAR          | S869           | 0.3281466  | 0.77586051 | 0.67305029 |
| Q8NHM5 | KDM2B    | TENSLANENQQPIKSEPESEGEPEK            | S975,S979      | 0.02478189 | 0.58478857 | 0.41830815 |
| P29375 | KDM5A    | VEPEVLSTDTQTSPEPGR                   | S204           | 0.00022239 | 0.47632374 | 0.19148037 |
| P41229 | KDM5C    | VQGLLENGDSVTSPEK                     | S1359          | 0.02287226 | 0.40984689 | 0.41830815 |
| P41229 | KDM5C    | EELSHSPEPCTK                         | S301           | 0.16646103 | 0.83064215 | 0.56312413 |
| Q07666 | KHDRB51  | SGSMDPSGHAHPSVR                      | S18            | 0.49369737 | 0.90862342 | 0.76351366 |
| Q92945 | KHSRP    | VQISPDSSGGLPER                       | S181           | 0.85995591 | 0.97987928 | 0.95107454 |
| O60303 | KIAA0556 | ELGLGCSPPAETLADAK                    | S660           | 0.08220594 | 0.55118757 | 0.50397847 |
| Q6ICG6 | KIAA0930 | VSTGDTSPCGTEEDSSPASMHER              | S267           | 0.11364777 | 0.62228709 | 0.53343618 |
| Q9Y2F5 | KIAA0947 | SELCSPLGK                            | S532           | 0.0601154  | 0.75574429 | 0.47702638 |
| Q9Y2F5 | KIAA0947 | SISPEVSASR                           | S925           | 0.26049242 | 0.88615333 | 0.62824642 |
| Q9Y2F5 | KIAA0947 | LDTGSPEPETR                          | S1854          | 0.87571468 | 1.04219574 | 0.95556965 |
| Q96AT1 | KIAA1143 | IQPQPDPDEDGDHSDKEDQPVVVLK            | S50            | 0.40653865 | 1.1153088  | 0.71690687 |
| Q96AT1 | KIAA1143 | IQPQPDPDEDGDHSDK                     | S50            | 0.75731554 | 0.87574154 | 0.90833103 |
| Q96AT1 | KIAA1143 | NSLLSFDNEDENE                        | S146           | 0.98235148 | 1.00889051 | 0.99355276 |
| Q96A73 | KIAA1191 | QPASAQSTPTPHSSPK                     | S183           | 0.01275631 | 0.52752918 | 0.39919401 |
| Q96A73 | KIAA1191 | QPASAQSTPTPHSSPK                     | S182           | 0.0183559  | 0.62581817 | 0.41830815 |
| Q69YN4 | KIAA1429 | SFLSESPSPGR                          | S1579          | 0.09450009 | 0.85264031 | 0.51670111 |
| Q69YN4 | KIAA1429 | EEDAPHREDYFEPISDR                    | S222           | 0.64382242 | 0.86584831 | 0.84760107 |
| Q69YN4 | KIAA1429 | GPRTTPPGPPDDDEDDPVPLVSGDK            | T184           | 0.67581899 | 0.89341229 | 0.8617255  |
| Q4ADV7 | KIAA1432 | SISLSQSAENVPASK                      | S1017          | 0.12835411 | 0.46978147 | 0.54122341 |
| Q9P266 | KIAA1462 | SLSPSSNSAFSR                         | S757           | 0.1365256  | 0.81660234 | 0.54797298 |
| Q9P206 | KIAA1522 | GLAGPPASPGK                          | S545           | 0.06198907 | 0.75827482 | 0.47702638 |
| Q9P206 | KIAA1522 | DQSPPPSPPPSYHPPPPPTK                 | S669,S673      | 0.37667515 | 0.75525816 | 0.70397848 |
| Q9P206 | KIAA1522 | LQLERPVPSPETQADLQR                   | S929           | 0.50129644 | 0.76393955 | 0.76563097 |
| Q9P206 | KIAA1522 | FSSVSSQPQR                           | S342           | 0.99741943 | 1.00041303 | 0.99864937 |

|        |           |                                                 |           |            |            |            |
|--------|-----------|-------------------------------------------------|-----------|------------|------------|------------|
| Q9HCM1 | KIAA1551  | HSSLGQSLSPEK                                    | S1358     | 0.05780027 | 0.65261411 | 0.47702638 |
| A0MZ66 | KIAA1598  | VTAEADSSPTGILATSEK                              | S494      | 0.5125146  | 0.90748013 | 0.77273537 |
| Q9BY89 | KIAA1671  | RSPTVEPSTLPR                                    | S1224     | 0.75234901 | 1.07555086 | 0.90689921 |
| Q9ULH0 | KIDINS220 | QMSFDLTK                                        | S918      | 0.02573297 | 0.79159431 | 0.41830815 |
| Q9ULH0 | KIDINS220 | LPSDEDESGTEESDNTPLLK                            | S1521     | 0.09009939 | 0.84031633 | 0.51018936 |
| Q9ULH0 | KIDINS220 | TPSTVTLNNSAPANR                                 | S1681     | 0.33776786 | 0.60718921 | 0.67736506 |
| Q9H1H9 | KIF13A    | TGSCSELDACPSK                                   | S1698     | 0.60474018 | 0.95333434 | 0.82911034 |
| Q9NQT8 | KIF13B    | SISSPNVNR                                       | S1381     | 0.077959   | 0.53854007 | 0.50397847 |
| Q9NQT8 | KIF13B    | ERPDLAPAGSPFR                                   | S1644     | 0.57517939 | 0.81078588 | 0.81432655 |
| Q86Y91 | KIF18B    | RGLSPDTQPSQGPSTPK                               | S674      | 0.10159987 | 0.52586496 | 0.52414255 |
| O95235 | KIF20A    | EHSLQVSPLEK                                     | S532      | 0.01102312 | 0.60663544 | 0.37969115 |
| Q7Z456 | KIF21A    | KLSSSDAPAQDTGSSAAVETDASR                        | S855      | 0.73369636 | 0.95359629 | 0.89605782 |
| Q7Z456 | KIF21A    | KIPEPSPVTR                                      | T1242     | 0.78141338 | 0.96284008 | 0.91755462 |
| Q7Z456 | KIF21A    | IPEPSPVTR                                       | S1239     | 0.94801541 | 0.98648699 | 0.98215506 |
| Q02241 | KIF23     | YMLTHQELASDGEIETK                               | S867      | 0.06842145 | 0.69568528 | 0.49083932 |
| Q02241 | KIF23     | RSSTVAPAQPDGAESEWTDVETR                         | S912      | 0.12082802 | 0.51142764 | 0.53774744 |
| O95239 | KIF4A     | TFSLTVR                                         | S801      | 0.09729326 | 0.56971446 | 0.52111664 |
| O95239 | KIF4A     | NQSLVEENEK                                      | S394      | 0.10255737 | 0.74458097 | 0.52414255 |
| O95239 | KIF4A     | ALASNTSFFSGCSPIEEAAH                            | S1225     | 0.33718329 | 0.62514169 | 0.67736506 |
| Q9BVG8 | KIFC3     | AHSAPSSGTSRPGSIR                                | S817,S813 | 0.5961543  | 0.83401819 | 0.82338978 |
| Q96J84 | KIRREL    | AIYSSFK                                         | S574      | 0.28293044 | 0.69072769 | 0.64790049 |
| Q07866 | KLC1      | KYDDDISPSEDK                                    | S162      | 0.02250616 | 1.49728321 | 0.41830815 |
| Q07866 | KLC1      | VDSPTVTTTTK                                     | S460      | 0.09577353 | 0.70508298 | 0.51670111 |
| Q9H0B6 | KLC2      | TLSSSSMDLSR                                     | S610      | 0.0954432  | 0.55108893 | 0.51670111 |
| Q9H0B6 | KLC2      | SVEEPTQPGGTGLSDSR                               | S589      | 0.15759564 | 0.74881302 | 0.56888781 |
| Q9H0B6 | KLC2      | ASSLNFLNK                                       | S582      | 0.81081416 | 0.92685409 | 0.92741413 |
| Q8TBB5 | KLHDC4    | QVLTAPGSAGQPRSEDEDSLEEAGSPAPGPCPR               | S413,S418 | 0.55398003 | 1.32350447 | 0.79795367 |
| Q8TBB5 | KLHDC4    | QVLTAPGSAGQPRSEDEDSLEEAGSPAPGPCPR               | S413      | 0.81276079 | 1.08862286 | 0.92840735 |
| Q03164 | KMT2A     | TIAHSPTSFTSSSK                                  | S2098     | 0.40464053 | 1.11177786 | 0.7160132  |
| Q03164 | KMT2A     | SREDSPELNPPGIEDNR                               | S1858     | 0.94992988 | 1.0098546  | 0.98215506 |
| Q9UMN6 | KMT2B     | RERPSGPEPVGQPR                                  | S861      | 0.38722627 | 0.86710964 | 0.71060254 |
| Q9UMN6 | KMT2B     | GQGTTPSPGPGVVR                                  | T2083     | 0.43609718 | 0.88385202 | 0.73335873 |
| Q9UMN6 | KMT2B     | GPVRSEDESVEAK                                   | S844      | 0.44885226 | 0.88538642 | 0.73811209 |
| Q9UMN6 | KMT2B     | GVLDLRPGEPAGEESPGLQER                           | S2348     | 0.67134984 | 0.88098341 | 0.86074656 |
| Q8NEZ4 | KMT2C     | EQSAEEDAEEVDNSK                                 | S89       | 0.3888895  | 0.91179907 | 0.61060254 |
| O14686 | KMT2D     | SPDTGPDWLK                                      | S4849     | 0.03567029 | 0.69914804 | 0.43874459 |
| O14686 | KMT2D     | QTAGQGSPCEEQEPR                                 | S1180     | 0.16797767 | 0.81646699 | 0.56312413 |
| O14686 | KMT2D     | LEGPVSPDVEPGK                                   | S1671     | 0.40493329 | 0.80978599 | 0.7160132  |
| O14686 | KMT2D     | LEGPVSPDVEPGKEETEEK                             | S1671     | 0.97324672 | 1.00619246 | 0.98966465 |
| O14686 | KMT2D     | DSEPAADGPAASEDPSATESDLNPNHVGESVLSGSPR           | S45       | 0.98000183 | 0.9973689  | 0.9926842  |
| P52292 | KPNA2     | NVSSFDDATSPQENR                                 | S62       | 0.01595078 | 0.51405811 | 0.41830815 |
| O00505 | KPNA3     | NVPQEELEDSDVDADFK                               | S60       | 0.31047891 | 0.92169893 | 0.66197301 |
| O00505 | KPNA3     | RNVQEELEDSDVDADFK                               | S60       | 0.74904755 | 1.05629014 | 0.90421302 |
| O00629 | KPNA4     | NVPHEDICEDSIDGDYR                               | S60       | 0.02555857 | 0.66419295 | 0.41830815 |
| Q8N9T8 | KRI1      | QLPALDGLMGPESPPAQEEEEAPVSPHK                    | S628,S639 | 0.07420051 | 0.5838047  | 0.49818003 |
| Q8N9T8 | KRI1      | AFVDESEDEGAGEGSSLLQK                            | S171      | 0.7959434  | 0.98191734 | 0.92373279 |
| Q8N9T8 | KRI1      | YVDEENSGETSNHR                                  | S136      | 0.9188001  | 1.00923788 | 0.9703611  |
| P04264 | KRT1      | SGGGFSSGSAGINYQR                                | S21       | 0.31161277 | 4.87391116 | 0.66201195 |
| P05783 | KRT18     | STFTSNYR                                        | T8        | 0.06032588 | 0.34391144 | 0.47702638 |
| P05783 | KRT18     | STFTSNYR                                        | S10       | 0.48389112 | 0.68899687 | 0.75785402 |
| P05783 | KRT18     | LLEDGEDFNLDALDSSNSMQTIQK                        | S399      | 0.57014208 | 1.35860709 | 0.81408076 |
| P19013 | KRT4      | GFSCGSAIVGGGK                                   | S19       | 0.08117514 | 0.37349988 | 0.50397847 |
| P19013 | KRT4      | SLYNLR                                          | S51       | 0.08366928 | 0.53976363 | 0.50397847 |
| P08729 | KRT7      | SAYGGPVGAGIR                                    | S53       | 0.17843382 | 0.4705149  | 0.56898248 |
| P05787 | KRT8      | LESGMQNMSIHTK                                   | S410      | 0.02124918 | 0.37341921 | 0.41830815 |
| P05787 | KRT8      | AFSSRSYTSPPGSR                                  | Y25,S21   | 0.16048152 | 0.27960631 | 0.55771783 |
| P05787 | KRT8      | LVSESSDVLPK                                     | S475      | 0.18258515 | 0.58787967 | 0.57200583 |
| P05787 | KRT8      | ISSSSFSR                                        | S37       | 0.22367201 | 0.67509526 | 0.6080317  |
| P05787 | KRT8      | VGSSNFR                                         | S43       | 0.30099369 | 1.74178495 | 0.65817287 |
| P05787 | KRT8      | SYTSGPGR                                        | S24       | 0.32531146 | 0.7381428  | 0.67180574 |
| P05787 | KRT8      | GQRASLEAAIAADAEQR                               | S330      | 0.34157815 | 1.47912499 | 0.67842858 |
| P05787 | KRT8      | ISSSSFSR                                        | S35       | 0.34306476 | 0.80623608 | 0.67878924 |
| P05787 | KRT8      | LVSESSDVLPK                                     | S478      | 0.44710285 | 0.81911237 | 0.73811209 |
| P05787 | KRT8      | SLDMSIIAEVK                                     | S253      | 0.50178464 | 1.20478659 | 0.76563097 |
| P05787 | KRT8      | AQYEDIANRSR                                     | S274      | 0.60283819 | 1.11454432 | 0.82778596 |
| P05787 | KRT8      | SLDMSIIAEVK                                     | S258      | 0.77619279 | 1.11308135 | 0.91412088 |
| P05787 | KRT8      | ASLEAAIAADAEQR                                  | S330      | 0.8229532  | 0.97650131 | 0.93447109 |
| P05787 | KRT8      | FASFIDK                                         | S104      | 0.86162095 | 0.9556406  | 0.95107454 |
| Q8IVT5 | KSR1      | ADVLEAHEAAEPEAGKSEAEDDEVEDDLPSSR                | S567      | 0.38333256 | 1.33296628 | 0.70940212 |
| Q86UP2 | KTN1      | AAGDTTVIENSDEVSPETESSEK                         | S1313     | 0.72574677 | 1.0675938  | 0.89291515 |
| Q86UP2 | KTN1      | EIQNGLNHESDESVPFR                               | S75       | 0.86187678 | 0.97208738 | 0.95107454 |
| Q969R5 | L3MBTL2   | ASSPELPSVVENIK                                  | S689      | 0.04675491 | 0.69492151 | 0.45625798 |
| Q6IAA8 | LAMTOR1   | LLLDPSPPTK                                      | S27       | 0.17915838 | 0.56772822 | 0.56898248 |
| Q6PKG0 | LARP1     | TASISSPSEGTPTVSGYGCTPQSLPK                      | S850,S851 | 0.03669542 | 0.7077748  | 0.446569   |
| Q6PKG0 | LARP1     | SLPTTVPEPSPNYR                                  | S774      | 0.0901081  | 0.72249752 | 0.51018936 |
| Q6PKG0 | LARP1     | ESPRRLQLPGAEGPAISDGEEGGGEPGAGGGGAAGAAGAGR       | S75,S90   | 0.10054629 | 0.63636464 | 0.52414255 |
| Q6PKG0 | LARP1     | ESPRRLQLPGAEGPAISDGEEGGGEPGAGGGGAAGAAGAGR       | S90       | 0.19050906 | 1.24502421 | 0.57584619 |
| Q6PKG0 | LARP1     | SLPTTVPEPSPNYR                                  | Y777,S766 | 0.24178197 | 0.73158701 | 0.61278278 |
| Q6PKG0 | LARP1     | NTFTAWSDEESDYEIDDRDVNK                          | S627      | 0.2633755  | 1.53717613 | 0.6321012  |
| Q6PKG0 | LARP1     | GSESATYVPVAPPTPAWQPEIKPEPAWHQDETSSVK            | S324      | 0.35359746 | 1.68286505 | 0.68569237 |
| Q6PKG0 | LARP1     | EGTQQQERESPRQLPGAEGPAISDGEEGGGEPGAGGGGAAGAAGAGR | T68,S75   | 0.38701484 | 0.75947768 | 0.71060254 |

|        |         |                                                 |                |            |            |             |
|--------|---------|-------------------------------------------------|----------------|------------|------------|-------------|
| Q6PKG0 | LARP1   | NTTFAWSDEESDYEIDDR                              | S627           | 0.52155977 | 0.90025939 | 0.77620221  |
| Q6PKG0 | LARP1   | SLPTTVPEPSPNYR                                  | S766           | 0.63128196 | 1.13547904 | 0.8405143   |
| Q6PKG0 | LARP1   | EGTGQQRERESPRLLQPGAEGPAISDGEEGGEPGAGGGAAGAAGAGR | T68            | 0.79091005 | 0.93611346 | 0.92210365  |
| Q659C4 | LARP1B  | LNGPGENVSEDEAQQSNQR                             | S60            | 0.03270477 | 1.24095013 | 0.43874459  |
| Q71RC2 | LARP4   | EQYVPPRSPK                                      | S722           | 0.68193644 | 1.10382415 | 0.86504202  |
| Q92615 | LARP4B  | EPSVPASCAVSATYERSPSPAHLRDDPK                    | S599,S601      | 0.41696737 | 0.86280992 | 0.72427252  |
| Q92615 | LARP4B  | SPSPAHLRDDPK                                    | S601           | 0.44958962 | 1.07153414 | 0.73811209  |
| Q9BR58 | LARP6   | LNCSTSPFIR                                      | S409           | 0.62721695 | 1.11509687 | 0.83899389  |
| Q4G0J3 | LARP7   | SRPTSEGSDIESTEPQK                               | S258           | 0.11142507 | 1.90011593 | 0.53343618  |
| Q4G0J3 | LARP7   | RSSSEDAESLAPR                                   | S300           | 0.11526712 | 1.41699971 | 0.53343618  |
| Q4G0J3 | LARP7   | SRPTSEGSDIESTEPQK                               | S261           | 0.14689545 | 1.36915078 | 0.55352644  |
| Q4G0J3 | LARP7   | SRPTSEGSDIESTEPQK                               | T257           | 0.20473943 | 1.30980216 | 0.58662445  |
| Q4G0J3 | LARP7   | SSSEDAESLAPR                                    | S298           | 0.3353801  | 0.81891724 | 0.67736506  |
| Q4G0J3 | LARP7   | RSSSEDAESLAPR                                   | S299           | 0.38241206 | 0.79984981 | 0.70884547  |
| Q4G0J3 | LARP7   | SRPTSEGSDIESTEPQK                               | S258,S261      | 0.83331975 | 0.9665272  | 0.93848641  |
| Q9Y4W2 | LAS1L   | AQQQEEQGSVNDVK                                  | S560           | 0.45064821 | 0.88912134 | 0.73811209  |
| Q9Y4W2 | LAS1L   | NIVVDDITEQKPEPQDDGKSTESDVK                      | S238,T236      | 0.96553117 | 0.98886511 | 0.98758099  |
| Q9Y4W2 | LAS1L   | AQQQEEQGSVNDVKEEEK                              | S560           | 0.9752757  | 0.98467634 | 0.98993501  |
| Q14847 | LASP1   | GFSVVADTPELQR                                   | T104           | 0.23370666 | 0.7399593  | 0.6080317   |
| Q95835 | LATS1   | SNSFNPLGNNR                                     | S464           | 0.02676619 | 0.65262305 | 0.41830815  |
| Q95835 | LATS1   | QITTSPIVTR                                      | S613           | 0.24367562 | 0.65903399 | 0.61377267  |
| Q53QV2 | LBH     | DRLPSIVPEPTEGESGELR                             | S63            | 0.49261398 | 0.68819445 | 0.76351366  |
| Q9Y2U8 | LEMD3   | ENYSDEEEDDDVASSR                                | S261           | 0.29407883 | 1.5108821  | 0.6555018   |
| Q8WVC0 | LEO1    | ANSDDERPVASDNDDEK                               | S212,S220      | 0.37025079 | 1.53823058 | 0.70105255  |
| Q8WVC0 | LEO1    | IQNSDDEERAQGSDEDK                               | S162,S171      | 0.42741429 | 1.35441138 | 0.72966058  |
| Q8WVC0 | LEO1    | KLTSDEEGEPSPGK                                  | S630           | 0.50037094 | 1.05938242 | 0.76563097  |
| Q8WVC0 | LEO1    | YVISDEEEEDDD                                    | S658           | 0.58621349 | 0.84874755 | 0.8200322   |
| Q8WVC0 | LEO1    | ANSDDERPVASDNDDEK                               | S212           | 0.67774281 | 1.04534534 | 0.8627275   |
| Q8WVC0 | LEO1    | MQNTDDEERQLSDDERQQLSEEEK                        | T188,S197,S205 | 0.71513233 | 1.31917981 | 0.88594092  |
| Q8WVC0 | LEO1    | KYVISDEEEEDDD                                   | S658           | 0.7466021  | 1.09394936 | 0.90316039  |
| Q8WVC0 | LEO1    | LTSDEEGEPSPGK                                   | S630           | 0.82901735 | 0.950016   | 0.9364171   |
| P18858 | LIG1    | VLGSEGEDEEALSPAK                                | S76            | 0.00109514 | 0.69883966 | 0.27314524  |
| P18858 | LIG1    | EWNGVVSSEDSVPK                                  | S51            | 0.00978219 | 0.47062147 | 0.37254089  |
| P18858 | LIG1    | VLGSEGEDEEALSPAK                                | S66,S76        | 0.0198571  | 0.54726622 | 0.41830815  |
| P18858 | LIG1    | RTIQEVLEEQSEDED                                 | S141           | 0.0706951  | 0.76061269 | 0.49571338  |
| P18858 | LIG1    | AETPTESVSEPEVATK                                | T195           | 0.21589982 | 0.84848485 | 0.60366234  |
| P18858 | LIG1    | VLGSEGEDEEALSPAK                                | S66            | 0.25877673 | 1.27389558 | 0.62630151  |
| P18858 | LIG1    | TIQEVLEEQSEDED                                  | S141           | 0.29126887 | 0.56239106 | 0.62503535  |
| P18858 | LIG1    | EGEDGDQPTTTPKPLK                                | T183           | 0.7323771  | 1.02162162 | 0.89605782  |
| P18858 | LIG1    | TIQEVLEEQSEDEDREAK                              | S141           | 0.85035687 | 0.96189704 | 0.94645687  |
| P49916 | LIG3    | LTTTGQVTPVK                                     | S210           | 0.02006532 | 0.5092004  | 0.41830815  |
| Q9UHB6 | LIMA1   | ETPHSPGVEDAPIAK                                 | S490           | 0.09559707 | 1.27670808 | 0.51670111  |
| Q9UHB6 | LIMA1   | QWTSLSLR                                        | S15            | 0.93900921 | 1.02810097 | 0.97909407  |
| Q9UPQ0 | LIMCH1  | ASVLDTSMSAGSGSPSK                               | S523           | 0.00851178 | 0.47743975 | 0.35749468  |
| Q9UPQ0 | LIMCH1  | HGRDDFSLDSFGSR                                  | S201           | 0.06729331 | 2.22135334 | 0.49083932  |
| Q9UPQ0 | LIMCH1  | SRQTPSPDVVLR                                    | T215,S217      | 0.10194227 | 0.63617187 | 0.52414255  |
| Q9UPQ0 | LIMCH1  | SVSQDLK                                         | S377           | 0.61090906 | 0.91612908 | 0.83095214  |
| Q9UPQ0 | LIMCH1  | GSSDGRGSDSESLPHR                                | S226           | 0.73605683 | 0.97103448 | 0.97676557  |
| Q9UGP4 | LIMD1   | QLSLSSR                                         | S233           | 0.12493757 | 1.55383151 | 0.5401424   |
| P53667 | LIMK1   | SPGAGSLGSPASQR                                  | S310           | 0.40499276 | 0.87649764 | 0.7160132   |
| Q96GY3 | LIN37   | ERECSPSPPLPEDEEGSEVTNSK                         | S138           | 0.78729763 | 0.95765159 | 0.92069713  |
| P02545 | LMNA    | SNEDQSMGNWQIK                                   | S463           | 0.02676098 | 0.75216541 | 0.41830815  |
| P02545 | LMNA    | SNEDQSMGNWQIK                                   | S458           | 0.08333036 | 0.82399547 | 0.50397847  |
| P02545 | LMNA    | SGAASSTPLSPTR                                   | S22            | 0.15456031 | 0.84036145 | 0.55688781  |
| P02545 | LMNA    | SGAASSTPLSPTR                                   | S12            | 0.17561377 | 0.75366433 | 0.56898248  |
| P02545 | LMNA    | SVGGSGGSGFDNLVTR                                | S632           | 0.22491936 | 0.69880427 | 0.6080317   |
| P02545 | LMNA    | SGAASSTPLSPTR                                   | T19            | 0.22930338 | 0.85283426 | 0.6080317   |
| P02545 | LMNA    | LRLSPSPTSQR                                     | S390,S392      | 0.44766185 | 0.87175813 | 0.73811209  |
| P02545 | LMNA    | SGAASSTPLSPTR                                   | T19,S22        | 0.77284894 | 0.93258488 | 0.91361901  |
| P02545 | LMNA    | SGAASSTPLSPTR                                   | S18            | 0.86123795 | 0.97984146 | 0.95107454  |
| Q8WW11 | LMO7    | EVAATEEDVTRLPSPSPFSSLSQDQAATSK                  | S988           | 0.14914998 | 4.10182498 | 0.55352644  |
| Q8WW11 | LMO7    | VTTEIQLPSPQVVEEQSPASLSLR                        | S867           | 0.30152636 | 3.0496247  | 0.65850145  |
| Q8WW11 | LMO7    | TSTTGAVATQSPTR                                  | S1586          | 0.39330072 | 0.73359364 | 0.713666053 |
| Q8WW11 | LMO7    | SRSTTELDYSTNK                                   | S1423          | 0.74760892 | 1.03758023 | 0.90350024  |
| Q8WW11 | LMO7    | SRSTTELDYSTNK                                   | T1425          | 0.94792716 | 0.99122083 | 0.98215506  |
| Q14693 | LPIN1   | SANQSPQSVGSSGVDSGVSTSDGLR                       | S449           | 0.06299293 | 0.66852816 | 0.47702638  |
| P50851 | LRBA    | VEGSPTEEANLPTELQDNLSPAASEAGEK                   | S1118          | 0.00562681 | 1.28758247 | 0.31900981  |
| P50851 | LRBA    | VEGSPTEEANLPTELQDNLSPAASEAGEK                   | S1135          | 0.69382664 | 1.04712916 | 0.87209451  |
| Q96I18 | LRCH3   | RWSGNEPTDEFSDLPLR                               | S324           | 0.6181498  | 1.18360481 | 0.83421157  |
| Q5VZK9 | LRR16A  | TASRPDDIPDPSPPK                                 | S1291          | 0.16158741 | 0.82321095 | 0.55797736  |
| Q5VZK9 | LRR16A  | SERPPTILMTEEPSPK                                | S1094          | 0.23156375 | 0.75142772 | 0.6080317   |
| Q5VZK9 | LRR16A  | RSSGFISELPEEGK                                  | S968           | 0.49106181 | 0.83051245 | 0.76263004  |
| Q15345 | LRR16A  | STQESLTAGGTDLK                                  | T327           | 0.10780294 | 0.57108065 | 0.53106619  |
| Q15345 | LRR16A  | APSRDEGSLLLGSR                                  | S281           | 0.14081187 | 0.50817211 | 0.54797298  |
| Q8N1G4 | LRR16A  | EEGSLSDTEADAVSQQLPDPTTNPASAGK                   | S518           | 0.33826193 | 1.12521589 | 0.67736506  |
| Q8IWT6 | LRR16A  | SRIEQGIVDR                                      | S217           | 0.29589082 | 0.92341729 | 0.65749804  |
| Q32MZ4 | LRRFIP1 | EIDCLSPAEAK                                     | S16            | 0.08219775 | 0.80402749 | 0.50397847  |
| Q32MZ4 | LRRFIP1 | ALDSNLENDLSDAPGREPGHFNPESR                      | S768           | 0.26238645 | 1.25065111 | 0.63060636  |
| Q32MZ4 | LRRFIP1 | SDQQGEALDSSQK                                   | S555           | 0.42294788 | 1.25030125 | 0.72757489  |
| Q32MZ4 | LRRFIP1 | TEVPGSPAGTEGNCQEQATGPSTVDTQNEPLDMKEPDEEK        | S521           | 0.58399782 | 1.07307692 | 0.81959597  |
| Q32MZ4 | LRRFIP1 | CTLPEHESPSQDISDACEAEATER                        | S733           | 0.65540586 | 1.18705604 | 0.85263945  |

|        |         |                                   |                         |            |            |            |
|--------|---------|-----------------------------------|-------------------------|------------|------------|------------|
| Q32MZ4 | LRRFIP1 | TEVPGSPAGTEGNCQEATGPSTVDTQNEPLDMK | S521                    | 0.67346392 | 0.87550928 | 0.86131187 |
| Q32MZ4 | LRRFIP1 | ALDSNSLENDLDSAPGREPGHFNPESR       | S766                    | 0.70063457 | 0.87669856 | 0.87594502 |
| Q32MZ4 | LRRFIP1 | IDGATQSSPAEPK                     | S714                    | 0.90614708 | 1.00847458 | 0.96653745 |
| Q9Y608 | LRRFIP2 | NSASATTPSLGNSSR                   | S320                    | 0.17065253 | 1.65751445 | 0.56526141 |
| Q9Y608 | LRRFIP2 | RGSGLTSSLIIDPDTSLSCLR             | S328                    | 0.53412287 | 1.19212411 | 0.78590527 |
| Q9Y608 | LRRFIP2 | RGSGLTSSLIIDPDTSLSCLR             | S332                    | 0.57511445 | 1.1519404  | 0.81432655 |
| Q9Y608 | LRRFIP2 | NSASATTPSLGNSSR                   | S324                    | 0.68446195 | 0.93177036 | 0.86760653 |
| Q9UFC0 | LRWD1   | RPDDVPLSLSPSK                     | S243                    | 0.09656326 | 0.58658293 | 0.51801227 |
| Q9UFC0 | LRWD1   | ACASPAQVEGSPVAGSDGSQPAVK          | S251                    | 0.77222056 | 1.06506604 | 0.91329931 |
| Q8ND56 | LSM14A  | TQLSQGRSSPQLDPLR                  | S178,S183               | 0.35179578 | 0.74199352 | 0.68418829 |
| Q8ND56 | LSM14A  | GDSGVDTQNSEGNADDEEDPLGPNICYDK     | S347                    | 0.44196135 | 0.91322364 | 0.73638842 |
| Q8ND56 | LSM14A  | SSPQLDPLR                         | S183                    | 0.5144085  | 0.85003915 | 0.77363444 |
| Q8ND56 | LSM14A  | SSPQLDPLR                         | S182                    | 0.77780538 | 0.97757848 | 0.91456529 |
| Q8ND56 | LSM14A  | SSPQLDPLR                         | S183                    | 0.90035896 | 0.98581415 | 0.96389066 |
| Q86X29 | LSR     | GPALTPIRDEEWGGHSPR                | S464                    | 0.12116493 | 1.81456486 | 0.53774744 |
| O95232 | LUC7L3  | NEVNGTSEDIKSEGDQTSN               | S425                    | 0.48654191 | 0.90534908 | 0.75953527 |
| Q86V48 | LUZP1   | EKPDSDDDLDIASLVTK                 | S659                    | 0.16741824 | 1.60166424 | 0.56312413 |
| P07948 | LYN     | GKDSLDDGVDLK                      | S11                     | 0.05952448 | 1.23572261 | 0.47702638 |
| P07948 | LYN     | DSLDDGVDLK                        | S13                     | 0.23463841 | 0.86166008 | 0.6080317  |
| Q9UPN3 | MACF1   | RQGSFSEVDVSHK                     | S3927                   | 0.05218482 | 1.32061069 | 0.46177    |
| Q9UPN3 | MACF1   | QGSFSEVDVSHK                      | S3927                   | 0.2306683  | 0.79506218 | 0.6080317  |
| Q9UPN3 | MACF1   | AFLAELEQNSPK                      | S4521                   | 0.36587942 | 0.85888116 | 0.69656646 |
| Q9UPN3 | MACF1   | SMDAMSPPTK                        | S4495                   | 0.7444786  | 0.92522416 | 0.90171553 |
| Q9UPN3 | MACF1   | RGSDDSDFDLLETQACSSTSESSAAGGQNSR   | S7330                   | 0.80677306 | 0.94475257 | 0.92607772 |
| P78559 | MAP1A   | SPESLPGPALEDIAIK                  | S1326                   | 0.28671214 | 1.27638369 | 0.6007167  |
| P78559 | MAP1A   | AEELEMEEVHPSDEEEEDATK             | T675                    | 0.44649842 | 0.93161515 | 0.73811209 |
| P78559 | MAP1A   | GQDVVQVEWQETSPTREEPAGEQK          | S1654                   | 0.68080368 | 1.06127933 | 0.86424175 |
| P46821 | MAP1B   | VSAEAEVAVPVSPEVTQEVVEEHCASPEDK    | S1298                   | 0.01243211 | 1.8190686  | 0.39919401 |
| P46821 | MAP1B   | VSAEAEVAVPVSPEVTQEVVEEHCASPEDK    | S1312                   | 0.01907205 | 1.80419355 | 0.41830815 |
| P46821 | MAP1B   | SPPLIGSEAYESFSLADDK               | S1400                   | 0.08040818 | 1.65891655 | 0.50397847 |
| P46821 | MAP1B   | AAEAGAEQYGLTPTTK                  | T1067                   | 0.09390668 | 0.59850231 | 0.51670111 |
| P46821 | MAP1B   | VQSLEGEKLSPK                      | S1779                   | 0.11417827 | 1.3873503  | 0.53343618 |
| P46821 | MAP1B   | SDISPLTPR                         | S1785                   | 0.12640465 | 1.22348377 | 0.5403576  |
| P46821 | MAP1B   | QGSPPQVSPVSEMTSTSLYQDK            | S1443                   | 0.13046822 | 1.41481118 | 0.54344847 |
| P46821 | MAP1B   | GAESPFEK                          | S1427                   | 0.16222225 | 1.2173913  | 0.55797736 |
| P46821 | MAP1B   | ASVSPMDEVPDSESPIEK                | S1389                   | 0.16613976 | 1.43815261 | 0.56312413 |
| P46821 | MAP1B   | DVMSDETNNETESPSQEFVNITK           | S1154                   | 0.17707557 | 1.20158861 | 0.56898248 |
| P46821 | MAP1B   | VSAEAEVAVPVSPEVTQEVVEEHCASPEDK    | S1298,S1312             | 0.17882387 | 1.36949429 | 0.56898248 |
| P46821 | MAP1B   | TATCHSSSPPIDAASAEPYGR             | S1819                   | 0.18146796 | 1.49688474 | 0.57200583 |
| P46821 | MAP1B   | SPSLSPSPSPLEK                     | S1265                   | 0.19935575 | 1.20963919 | 0.58169594 |
| P46821 | MAP1B   | TPEEGSYSDISEK                     | T1949                   | 0.21224955 | 0.61731848 | 0.59909252 |
| P46821 | MAP1B   | SPPLIGSEAYESFSLADDK               | S1408                   | 0.22232723 | 1.73140198 | 0.6080317  |
| P46821 | MAP1B   | ESSPLYSPTFSDSTSAAVK               | S1793,S1797             | 0.22415861 | 1.44711136 | 0.6080317  |
| P46821 | MAP1B   | GEAEQSEEEADEEDK                   | S1016                   | 0.23186772 | 1.15358478 | 0.6080317  |
| P46821 | MAP1B   | DLSTPGLK                          | S1852                   | 0.24206471 | 0.65191851 | 0.61278278 |
| P46821 | MAP1B   | TLEVVSQSVTGSAGHTPYYSQPTDEK        | S1322                   | 0.28627698 | 1.36008374 | 0.65007167 |
| P46821 | MAP1B   | TTSPPEVSGYSYEK                    | S1965                   | 0.28942261 | 1.15047089 | 0.65205353 |
| P46821 | MAP1B   | GPAESPDDEGITTEGEGECEQTPEELEPEVK   | S891                    | 0.32379969 | 1.19052523 | 0.67067311 |
| P46821 | MAP1B   | SDISPLTPR                         | T1788                   | 0.33340202 | 1.20746648 | 0.67622969 |
| P46821 | MAP1B   | SDISPLTPR                         | T1788,S1785             | 0.38220563 | 1.74371664 | 0.70884547 |
| P46821 | MAP1B   | QGSPPQVSPVSEMTSTSLYQDK            | S1438,S1443             | 0.39832655 | 1.23231198 | 0.7160132  |
| P46821 | MAP1B   | ASVSPMDEVPDSESPIEK                | S1376,S1389             | 0.42070344 | 1.27914439 | 0.72484937 |
| P46821 | MAP1B   | QGSPPQVSPVSEMTSTSLYQDK            | S1438                   | 0.53042105 | 1.09385783 | 0.78301333 |
| P46821 | MAP1B   | EECPRPMISPPDFSPK                  | S1618,S1620             | 0.53443384 | 1.49831852 | 0.78590527 |
| P46821 | MAP1B   | ASVSPMDEVPDSESPIEK                | S1376                   | 0.53814197 | 1.17841993 | 0.783241   |
| P46821 | MAP1B   | HMDPPAPVQDRSPSPR                  | S2209,S2211             | 0.57411403 | 0.82351454 | 0.81432655 |
| P46821 | MAP1B   | SLMSSPEDLTK                       | S832                    | 0.60851725 | 1.1249654  | 0.8300539  |
| P46821 | MAP1B   | DVMSDETNNETESPSQEFVNITK           | S1144                   | 0.65221826 | 1.10225171 | 0.8505262  |
| P46821 | MAP1B   | ESSPLYSPTFSDSTSAAVK               | S1797                   | 0.66398848 | 0.93226023 | 0.85711256 |
| P46821 | MAP1B   | SVNFSLTPNEIK                      | T1282                   | 0.67820866 | 0.86458952 | 0.8627275  |
| P46821 | MAP1B   | SDISPLTPR                         | T1788,S1782             | 0.71435509 | 1.16970046 | 0.88593408 |
| P46821 | MAP1B   | ESSPLYSPTFSDSTSAAVK               | S1793                   | 0.72253026 | 0.9571263  | 0.89157396 |
| P46821 | MAP1B   | SPSDSGSYETIGK                     | S1915                   | 0.74462224 | 0.95254237 | 0.90171553 |
| P46821 | MAP1B   | TTRTPEEGSYSDISEK                  | T1949                   | 0.76964276 | 1.08562484 | 0.91329931 |
| P46821 | MAP1B   | ASVSPMDEVPDSESPIEK                | S1378                   | 0.79898485 | 1.05876125 | 0.92445479 |
| P46821 | MAP1B   | VSPSKSPSLSPSPSPLEK                | S1252,S1260,S1262,S1265 | 0.80647933 | 1.16756834 | 0.92607772 |
| P46821 | MAP1B   | SPSLSPSPSPLEK                     | S1256,S1265             | 0.81928126 | 1.04599346 | 0.93245362 |
| P46821 | MAP1B   | FEDEGAGFEESSETGDYEEK              | S937                    | 0.8469146  | 0.96053998 | 0.9453218  |
| P46821 | MAP1B   | ESSPLYSPTFSDSTSAAVK               | S1792                   | 0.87663388 | 1.03378904 | 0.95556965 |
| P46821 | MAP1B   | ESVASGDDRAEEDMDEAIEK              | S995                    | 0.91136091 | 0.96852792 | 0.9669909  |
| P46821 | MAP1B   | TTRTPDSTCYETAEK                   | T2034                   | 0.92473538 | 0.97092182 | 0.97208912 |
| P46821 | MAP1B   | ESVASGDDRAEEDMDEAIEK              | S992                    | 0.93878759 | 0.97195724 | 0.97909407 |
| P46821 | MAP1B   | TLEVVSQSVTGSAGHTPYYSQPTDEK        | Y1337,S1322             | 0.94083808 | 1.01378122 | 0.97922223 |
| Q66K74 | MAP1S   | AVPMAPAPASPGSSNDSSAR              | S759                    | 0.82882761 | 0.9504902  | 0.9364171  |
| Q66K74 | MAP1S   | LSLSPLR                           | S657                    | 0.97038783 | 0.98809417 | 0.98915891 |
| P11137 | MAP2    | VDHGAEIITQSPGR                    | S1782                   | 0.18452716 | 1.18502203 | 0.57356637 |
| P36507 | MAP2K2  | LNQPGTPTR                         | T396                    | 0.62493637 | 1.06884713 | 0.8384421  |
| Q9Y2U5 | MAP3K2  | DRSSPPPGYIPDELHQVAR               | S163                    | 0.24199434 | 0.87841044 | 0.61278278 |
| Q9Y2U5 | MAP3K2  | AQSYPDNHQEFSDYDNPIFEK             | S239                    | 0.59314511 | 0.94233947 | 0.82284423 |
| O43318 | MAP3K7  | RMSADMSEIEAR                      | S389                    | 0.24115099 | 0.69039791 | 0.61270846 |
| P27816 | MAP4    | KCSLPAEEDSVLEK                    | S636                    | 0.08021722 | 0.77676833 | 0.50397847 |

|        |          |                                             |           |            |            |             |
|--------|----------|---------------------------------------------|-----------|------------|------------|-------------|
| P27816 | MAP4     | DGVLTLANNVTPAK                              | T571      | 0.09001117 | 0.52445032 | 0.51018936  |
| P27816 | MAP4     | DMSPLSETEMALGK                              | S507      | 0.10614343 | 1.36790124 | 0.52598269  |
| P27816 | MAP4     | KPCSETSQIEDTPSSKPTLLANGGHGVEGSDTTGSPTEFLEEK | S99       | 0.21738802 | 2.44602547 | 0.60411977  |
| P27816 | MAP4     | VGSLDNVGHLPAGGAVK                           | S1073     | 0.57439187 | 1.30377368 | 0.81432655  |
| P27816 | MAP4     | DVTPPPETEVVLIK                              | T521      | 0.87194938 | 1.01112372 | 0.95542841  |
| O95819 | MAP4K4   | RDSPLOGSGQQNSQAGQR                          | S639      | 0.71204731 | 1.04898447 | 0.88466484  |
| Q9Y4K4 | MAP4K5   | RQSSPCSGPVAETSSIGNGDGISK                    | S436      | 0.47450889 | 0.79633103 | 0.75205182  |
| Q9Y4K4 | MAP4K5   | TASEINFDK                                   | S335      | 0.49670982 | 0.85883444 | 0.76446134  |
| Q14244 | MAP7     | SVSTMNLSK                                   | S183      | 0.00809264 | 1.69214195 | 0.35749468  |
| Q3KQU3 | MAP7D1   | LSASTASELSPK                                | S460      | 0.0281712  | 0.62783824 | 0.42553343  |
| Q3KQU3 | MAP7D1   | SSQPSPTAVPASDSPPTK                          | T118,S123 | 0.07603663 | 0.62594841 | 0.50397847  |
| Q3KQU3 | MAP7D1   | SSQPSPTAVPASDSPPTK                          | T128,S112 | 0.43740531 | 0.78134557 | 0.73338954  |
| Q3KQU3 | MAP7D1   | QLPLEPESPSGQVGRPRAPPQEESPSSEAK              | S70,S86   | 0.48106265 | 0.70517048 | 0.75589799  |
| Q3KQU3 | MAP7D1   | SSQPSPTAVPASDSPPTK                          | S116      | 0.55834726 | 0.93814433 | 0.8022311   |
| Q3KQU3 | MAP7D1   | QLPLEPESPSGQVGRPRAPPQEESPSSEAK              | S88       | 0.69872294 | 1.17724507 | 0.87537352  |
| P28482 | MAPK1    | VADPDHDTGFLTEYVATR                          | Y187      | 0.96047311 | 0.98435571 | 0.98502328  |
| P27361 | MAPK3    | IADPEHDHTGFLTEYVATR                         | Y204,T202 | 0.17243773 | 0.2052584  | 0.56561687  |
| P27361 | MAPK3    | IADPEHDHTGFLTEYVATR                         | Y204      | 0.399812   | 1.45721998 | 0.7160132   |
| P29966 | MARCK5   | EAPAEGEAAEPGSPTAAEGEAASAASSTSSPK            | S135      | 0.01616595 | 0.60359983 | 0.41830815  |
| P29966 | MARCK5   | AEDGATPSPNETPK                              | S145      | 0.0486615  | 0.7275188  | 0.45625798  |
| P29966 | MARCK5   | GEAAERPGEEAAVASSPSK                         | S26       | 0.08899454 | 0.77540107 | 0.5099787   |
| P29966 | MARCK5   | VNGDASPAEAESGAK                             | S46       | 0.09758142 | 0.81948718 | 0.52139713  |
| P29966 | MARCK5   | AEDGATPSPNETPKK                             | T150,S145 | 0.09924242 | 0.60280604 | 0.52414255  |
| P29966 | MARCK5   | RFSFK                                       | S159      | 0.138559   | 2.91684496 | 0.54797298  |
| P29966 | MARCK5   | AEDGATPSPNETPK                              | S147      | 0.13991568 | 0.80444092 | 0.54797298  |
| P29966 | MARCK5   | EAPAEGEAAEPGSPTAAEGEAASAASSTSSPK            | S132      | 0.24607482 | 0.73719462 | 0.61377267  |
| P29966 | MARCK5   | AEDGATPSPNETPKK                             | T150      | 0.27051273 | 0.86593647 | 0.63502787  |
| P29966 | MARCK5   | GEAAERPGEEAAVASSPSK                         | S29       | 0.3388968  | 0.79658444 | 0.761818743 |
| P29966 | MARCK5   | EAPAEGEAAEPGSPTAAEGEAASAASSTSSPK            | T120      | 0.58234143 | 0.81103141 | 0.81845981  |
| P29966 | MARCK5   | GEPAAAAEPAGASPVKE                           | S101      | 0.90619902 | 0.98210188 | 0.96653745  |
| P49006 | MARCKSL1 | GDVTAEEAAGASPAK                             | S22       | 0.01760399 | 0.71570326 | 0.41830815  |
| P49006 | MARCKSL1 | GAEASAEEEEAGPQATEPSTPSGPGPTPASAEQNE         | T178      | 0.16328647 | 0.70411222 | 0.55844944  |
| P49006 | MARCKSL1 | GAEASAEEEEAGPQATEPSTPSGPGPTPASAEQNE         | S165      | 0.2903345  | 0.81715558 | 0.65205353  |
| Q7KZ17 | MARK2    | GRNSATSADQPHIGNYR                           | S40       | 0.04374464 | 0.59842367 | 0.45441331  |
| Q7KZ17 | MARK2    | VPASPLPLGR                                  | S456      | 0.49458098 | 0.80331136 | 0.76357885  |
| Q96GX5 | MASTL    | NFELVDSSPK                                  | S453      | 0.02047037 | 0.51007232 | 0.41830815  |
| P43243 | MATR3    | GPSLNPVLDYDHGSR                             | S208      | 0.23655546 | 1.59882663 | 0.6080317   |
| P43243 | MATR3    | DTSENADGQSDENKDDYIPDEYR                     | S766      | 0.29704031 | 1.48800548 | 0.65749804  |
| P43243 | MATR3    | GPSLNPVLDYDHGSR                             | S206      | 0.5801856  | 0.74646915 | 0.8170849   |
| P43243 | MATR3    | SYSPDGKESPSDK                               | S598,S604 | 0.76464903 | 0.95885457 | 0.91122881  |
| P43243 | MATR3    | NEENTEPEGAESSENADDPNK                       | S747      | 0.78969705 | 0.9771913  | 0.92178686  |
| P43243 | MATR3    | DSFDDRGPSLNPVLDYDHGSR                       | S206      | 0.7926075  | 0.9099749  | 0.9228136   |
| P43243 | MATR3    | SYSPDGKESPSDK                               | Y597,S604 | 0.83951141 | 1.03403526 | 0.9423761   |
| Q72434 | MAVS     | NEETPAAPTAPAGATGGSSAWLDSSEN                 | S408      | 0.00340551 | 0.4132663  | 0.27925141  |
| Q72434 | MAVS     | EPSYPMVPQEQTAEPSPGENSEQALQTLSPR             | S165      | 0.82556484 | 0.94980361 | 0.95839378  |
| O95243 | MBD4     | SLSSGSNFCSEQK                               | S318      | 0.83236585 | 1.03611614 | 0.93835286  |
| Q96N66 | MBOAT7   | AGGGPTLQCPPSSPEK                            | S285      | 0.97920014 | 1.00342011 | 0.99216395  |
| P49736 | MCM2     | GLLYDSEDEEERPAR                             | S139      | 0.34894611 | 0.89928525 | 0.6836009   |
| P49736 | MCM2     | GLLYDSEDEEERPAR                             | S139      | 0.44524556 | 1.28881988 | 0.73811209  |
| P49736 | MCM2     | RGNDPLTSSPGR                                | S27       | 0.45685895 | 0.8208036  | 0.74093656  |
| P49736 | MCM2     | GNDPLTSSPGR                                 | S27       | 0.95142887 | 0.99383408 | 0.98385966  |
| P49736 | MCM2     | RGNDPLTSSPGR                                | S26       | 0.95731915 | 0.99571276 | 0.98388755  |
| P25205 | MCM3     | DGDSYDPYFSDTEEMMPQVHTPK                     | T722,S711 | 0.31229886 | 1.71189568 | 0.6622373   |
| P25205 | MCM3     | DGDSYDPYFSDTEEMMPQVHTPK                     | S711      | 0.71157944 | 1.18096647 | 0.88466484  |
| O60318 | MCM3AP   | KPGDGEVSPSTEDAPFQHSPLGK                     | T530      | 0.18441241 | 1.34655253 | 0.73556637  |
| Q14566 | MCM6     | VSGVDGYETEGIR                               | T278      | 0.02459002 | 0.30620877 | 0.41830815  |
| Q9BTE3 | MCMBP    | VSPSTSYTPSR                                 | S154      | 0.09800444 | 0.76342282 | 0.52248806  |
| Q14676 | MDC1     | ESEDSETQPDFTHLEAYGPCLSPPR                   | S780      | 0.11039194 | 1.35652215 | 0.53343618  |
| Q14676 | MDC1     | GPGAPGLAHLQESQAGSDTDVEEGK                   | S376      | 0.45015291 | 0.92819957 | 0.73811209  |
| Q00987 | MDM2     | AISETTEENDELSEGER                           | S166      | 0.08058295 | 0.57564299 | 0.50397847  |
| Q9NU22 | MDN1     | NGGEDTDNEEGEENPLEIK                         | T4898     | 0.22867897 | 0.72542976 | 0.6800317   |
| Q9NU22 | MDN1     | AEENTDQASPDQEDYAGFER                        | S4538     | 0.29993355 | 1.07465693 | 0.65817287  |
| P51608 | MECP2    | MPFQTSPPGK                                  | S229      | 0.00772802 | 0.59695641 | 0.35749468  |
| P51608 | MECP2    | AETSEGSAPAVPEASASPK                         | S80       | 0.8785305  | 1.02251732 | 0.95627657  |
| Q93074 | MED12    | GSPSPKPDVEK                                 | S698      | 0.18102361 | 1.09421001 | 0.57144392  |
| Q9UHV7 | MED13    | IEVDEGFCSPKPEIK                             | S890      | 0.23166992 | 0.82176967 | 0.6080317   |
| Q71F56 | MED13L   | MEVEDGLGSPKPEIK                             | S923      | 0.374229   | 0.77431316 | 0.7024407   |
| O60244 | MED14    | KLSDDPCEVSK                                 | S617      | 0.67934554 | 1.10308648 | 0.86312417  |
| O75448 | MED24    | LLSSNEDDANILSSPTDR                          | S862      | 0.40923537 | 0.80886718 | 0.71721535  |
| Q02078 | MEF2A    | GCSDPDPDTSVYLTPHTEEK                        | S98       | 0.75595613 | 0.93735101 | 0.90833103  |
| Q7L2J0 | MEPCE    | DITDPLSLNCTDEGHVVLASPLK                     | S254      | 0.32132199 | 1.74119482 | 0.67020204  |
| Q7L2J0 | MEPCE    | ESPGAAATSSSGPQAQQHR                         | S69       | 0.51802963 | 0.82851608 | 0.77582848  |
| Q7L2J0 | MEPCE    | CAPSAGSAPAAVGRESGAAATSSSGPQAQQHR            | S60,S69   | 0.53654243 | 1.29697896 | 0.78705986  |
| Q7L2J0 | MEPCE    | TLNAETPKSSPLPAK                             | T213,S216 | 0.87630979 | 0.91758171 | 0.95556965  |
| P08581 | MET      | SVSPITTEMVSNESVDYR                          | S988      | 0.33778899 | 0.80406448 | 0.67736506  |
| Q86W50 | METTL16  | EGEAAAVGEGPCPSQESLQEQENPEPTEDERSEEK         | S455      | 0.00042372 | 1.77673772 | 0.2160495   |
| Q86U44 | METTL3   | NPEAALSPTR                                  | S43       | 0.24124061 | 0.80408984 | 0.61270846  |
| P55081 | MFAP1    | SLAALDALNTDDEENDEEEYAWK                     | T267      | 0.16817724 | 2.21907778 | 0.56312413  |
| P55081 | MFAP1    | IVEPEVVGESDSEVEGDAWR                        | S118      | 0.34858303 | 1.40762475 | 0.68327828  |
| Q6Z57  | MFS06    | VAILTDEEEQK                                 | T10       | 0.28025067 | 1.2279921  | 0.6455595   |
| Q81WI9 | MGA      | VVANQNANSPNVPKG                             | S607      | 0.42979261 | 0.68140664 | 0.73021716  |



|        |           |                              |             |            |            |            |
|--------|-----------|------------------------------|-------------|------------|------------|------------|
| O60502 | MGEA5     | LENEGDEDIETDVLYSPQMALK       | S364        | 0.23456206 | 1.59179819 | 0.6080317  |
| O60502 | MGEA5     | LENEGDEDIETDVLYSPQMALK       | T370        | 0.42848849 | 1.16888932 | 0.72966058 |
| O60291 | MGRN1     | AASIENVLQDSSPEHCGR           | S524        | 0.18355545 | 0.79785277 | 0.57261319 |
| O60291 | MGRN1     | SPSSPIHEEDEEK                | S460        | 0.20460527 | 1.38312305 | 0.58662445 |
| Q8N3F8 | MICALL1   | VEQMPQASPLAPR                | S578        | 0.96039909 | 1.01227837 | 0.98502328 |
| O15344 | MID1      | ASVSGPNPSETRR                | S98         | 0.18932414 | 1.14324241 | 0.57509931 |
| O15344 | MID1      | ASVSGPNPSETRR                | S92,S96     | 0.4125485  | 0.80764917 | 0.72049544 |
| O15344 | MID1      | ASVSGPNPSETRR                | S96         | 0.66182913 | 1.0438783  | 0.85592923 |
| Q8N108 | MIER1     | DSSGQEDETQSSNDPQSVAQDAQEIRPR | S122        | 0.10141971 | 0.7612235  | 0.52414255 |
| Q8N108 | MIER1     | VNSNGKESPGSEFFQEAVSHGK       | S483,S488   | 0.96733277 | 0.99341383 | 0.98758099 |
| Q8N4C8 | MINK1     | VGVSCKPDSFVLSPGNK            | S777,S782   | 0.22253585 | 0.625186   | 0.6080317  |
| Q9NXC5 | MIOS      | GFSQYGVVSGSPTK               | S766        | 0.33324312 | 0.81557159 | 0.67622969 |
| Q8IVT2 | MISP      | ALSSDSILSPAPDAR              | S400        | 0.03343934 | 0.54212705 | 0.43874459 |
| Q8IVT2 | MISP      | ASTPDVWVSEGPQGLR             | T377        | 0.10469827 | 0.54514059 | 0.52486294 |
| Q8IVT2 | MISP      | SSTVATLQGTDPHGDPR            | S155        | 0.162358   | 0.57134331 | 0.57597736 |
| Q8IVT2 | MISP      | ALSSDSILSPAPDAR              | S395        | 0.17049698 | 0.56397174 | 0.56526141 |
| Q8IVT2 | MISP      | GLHSENREDEGWQVYR             | S84         | 0.34313939 | 0.69137559 | 0.67878924 |
| Q8IVT2 | MISP      | SQSSDLLER                    | S541        | 0.42836043 | 0.728      | 0.72966058 |
| Q8IVT2 | MISP      | ALSSDSILSPAPDAR              | S394        | 0.44440833 | 0.81074395 | 0.73811209 |
| Q8IVT2 | MISP      | RALSSDSILSPAPDAR             | S394        | 0.63442134 | 1.17015218 | 0.8428508  |
| Q8IVT2 | MISP      | LSLITAPR                     | S335        | 0.66877335 | 1.27206105 | 0.85942366 |
| Q8IVT2 | MISP      | SQSSDLLER                    | S543        | 0.77377822 | 1.04489499 | 0.91388621 |
| Q8IVT2 | MISP      | NALPEVFSPTDENSDQNSR          | S575        | 0.8776036  | 1.03740927 | 0.95556965 |
| P46013 | MKI67     | TPVQYQQQNSPQK                | S357        | 0.00395311 | 0.47560976 | 0.2896703  |
| P46013 | MKI67     | SSEPVMIMK                    | S3042       | 0.01792906 | 0.49597581 | 0.41830815 |
| P46013 | MKI67     | IPCDSPQSDPVDPTSTK            | S1253       | 0.02115769 | 0.45929008 | 0.41830815 |
| P46013 | MKI67     | DINTFVGTPEVK                 | T1923       | 0.04719163 | 0.66396609 | 0.45625798 |
| P46013 | MKI67     | SPQDPDPVDTPEASTK             | S2344       | 0.06275743 | 0.59718716 | 0.47702638 |
| P46013 | MKI67     | LDLTENLTGSK                  | S1329       | 0.06281074 | 0.50207143 | 0.47702638 |
| P46013 | MKI67     | DINTFLGTVPQK                 | T1801       | 0.07403615 | 0.41760875 | 0.49918003 |
| P46013 | MKI67     | SGGSGHVAEPASPEQELDQNK        | S308        | 0.11671894 | 0.74184529 | 0.53343618 |
| P46013 | MKI67     | SPPPEVDTPSTK                 | S1131       | 0.15241491 | 0.6876054  | 0.55688781 |
| P46013 | MKI67     | SPPPEMDTPTSTR                | S2105       | 0.21905973 | 0.77179659 | 0.60411977 |
| P46013 | MKI67     | MPCESSPPESADTPTSTR           | S1376       | 0.27639684 | 0.82098949 | 0.64144927 |
| P46013 | MKI67     | MTSLETKTSDTETEPSK            | S859        | 0.34355558 | 0.53508274 | 0.67909008 |
| P46013 | MKI67     | SSPELEDTATSSK                | S2828       | 0.47903957 | 0.89776692 | 0.75541886 |
| Q969V6 | MKL1      | AGSCCLSPGGR                  | S511        | 0.0026216  | 0.63479484 | 0.27314524 |
| Q969V6 | MKL1      | FGSTGTPPPVPTPSE              | T450,S454   | 0.21315885 | 0.74536139 | 0.5997705  |
| Q9ULH7 | MKL2      | SPAAFHEQIK                   | S66         | 0.06107681 | 0.65661479 | 0.47702638 |
| Q9ULH7 | MKL2      | MTNNEEDLSPTSSTLSNELDAAEK     | T545        | 0.61893438 | 0.90553345 | 0.83494321 |
| Q15773 | MLF2      | LAIQGPEDPSR                  | S238        | 0.00383636 | 0.50747922 | 0.28722668 |
| P40692 | MLH1      | HREDSVEMVEDDSR               | S477        | 0.13609582 | 0.60175591 | 0.54761068 |
| Q5TCX8 | MLK4      | ITVQASPNDK                   | S528        | 0.28153348 | 0.75715077 | 0.6455595  |
| P55196 | MLLT4     | SQDADSPGSSGAPENLTFK          | S1779       | 0.01562549 | 0.803625   | 0.41830815 |
| P55196 | MLLT4     | TISNPEVMVK                   | S216        | 0.1008156  | 0.72930942 | 0.52414255 |
| P55196 | MLLT4     | SSPNVANQPSPGK                | S1182       | 0.24332287 | 1.14368057 | 0.61347288 |
| Q9BV36 | MLPH      | ASSESQIFELNK                 | S336        | 0.12653435 | 0.66686118 | 0.5403576  |
| Q9NYL2 | MLTK      | SSSPTQYGLTK                  | S637        | 0.82417283 | 1.03219697 | 0.93550117 |
| Q9Y6X9 | MORC2     | SPPLPAVIR                    | S615        | 0.44238326 | 0.72803457 | 0.73673498 |
| Q9Y6X9 | MORC2     | SVAVSDEEEVEEAEER             | S743        | 0.96230069 | 0.99591837 | 0.98552217 |
| Q14149 | MORC3     | RLSSQFENSYYK                 | S560        | 0.92314163 | 0.9744619  | 0.97166863 |
| O75970 | MPDZ      | DADLSPVNASIIK                | S483        | 0.1901621  | 0.75326867 | 0.57584619 |
| O00566 | MPHOSPH10 | EDLEDEEEVSDMGNDPEMGER        | S139        | 0.25649984 | 2.00627276 | 0.6256271  |
| Q99549 | MPHOSPH8  | GYTSDDDTWEPEIHLEDCK          | S85         | 0.12481281 | 1.42916957 | 0.5401424  |
| Q99549 | MPHOSPH8  | GYTSDDDTWEPEIHLEDCK          | T84         | 0.1323676  | 1.4872089  | 0.54661151 |
| Q99549 | MPHOSPH8  | GAEAFGDSEEDGEDVFEVEK         | S51         | 0.35106701 | 1.14802411 | 0.68418829 |
| Q99549 | MPHOSPH8  | GLWSTDSAEEDK                 | S403        | 0.64580731 | 0.94707828 | 0.84855908 |
| Q8N3R9 | MPP5      | KQELDLNLSMR                  | S83         | 0.16679792 | 0.75912048 | 0.56312413 |
| Q6WCQ1 | MPRIIP    | SPDSATVSGYDIMK               | S977        | 0.11949618 | 1.18173291 | 0.53759949 |
| Q6WCQ1 | MPRIIP    | DQPDGSSLSPAQSPSQPPAASSLR     | S220        | 0.44601041 | 0.85345219 | 0.73811209 |
| Q6WCQ1 | MPRIIP    | DQPDGSSLSPAQSPSQPPAASSLR     | S220,S224   | 0.65881927 | 1.17989581 | 0.85428222 |
| Q6WCQ1 | MPRIIP    | AEEQQLPPPLSPPSPSTPNHR        | S289,S292   | 0.71102471 | 1.05411255 | 0.88466484 |
| Q6WCQ1 | MPRIIP    | DQPDGSSLSPAQSPSQPPAASSLR     | S220,S224   | 0.82897783 | 1.0722203  | 0.9364171  |
| O95297 | MPZL1     | SESVVYADIR                   | S260        | 0.07951669 | 0.32027686 | 0.50397847 |
| O95297 | MPZL1     | DYTGCSSTESLSPVK              | S208        | 0.08604511 | 0.17326668 | 0.50397847 |
| O95297 | MPZL1     | DYTGCSSTESLSPVK              | S204        | 0.14826047 | 0.55322423 | 0.55352644 |
| O95297 | MPZL1     | DYTGCSSTESLSPVK              | S210        | 0.31168788 | 0.85932388 | 0.66201195 |
| O95297 | MPZL1     | SPSDTEGLVK                   | S221        | 0.65955136 | 1.09585724 | 0.85473065 |
| O95297 | MPZL1     | SESVVYADIR                   | Y263        | 0.97690017 | 1.00344112 | 0.99099976 |
| Q9NV56 | MRGBP     | VLTAANSNPPSAAK               | S191,S195   | 0.3161018  | 1.13563984 | 0.66476843 |
| Q9NV56 | MRGBP     | VLTAANSNPPSAAK               | S194        | 0.90987404 | 0.97403174 | 0.9669909  |
| P52701 | MSH6      | SEEDNEIESEEEVQPK             | S227        | 0.09101584 | 0.77683752 | 0.51141856 |
| P52701 | MSH6      | VHVQFFDDSPTR                 | S137        | 0.30502847 | 0.74295225 | 0.6612054  |
| P52701 | MSH6      | VISDESIDIGGSDFEVPDTK         | S252,S261   | 0.33148298 | 2.18295713 | 0.67604741 |
| Q86UE4 | MTDH      | WNSVSPASAGK                  | S308        | 0.03951169 | 0.71269518 | 0.44899888 |
| Q86UE4 | MTDH      | SQEPPIPDQKVSDDDK             | S426        | 0.3315459  | 1.08590387 | 0.67604741 |
| Q15390 | MTFR1     | QISLPDLSQEEPQLK              | S119        | 0.32223875 | 0.66825671 | 0.67020204 |
| Q9H019 | MTFR1L    | NASVPNLR                     | S103        | 0.2109212  | 0.72607261 | 0.59787046 |
| Q13614 | MTMR2     | ASSPAQCVTPVQTVV              | S631        | 0.10022329 | 0.48923035 | 0.52414255 |
| Q765P7 | MTSS1L    | AGSEECVFTYDETASPLADLAK       | S612        | 0.33418784 | 1.18186784 | 0.67622969 |
| Q9ULD2 | MTU51     | NSGFSPSPISPR                 | S1264,S1268 | 0.0235773  | 0.51306077 | 0.41830815 |

|        |         |                                          |             |            |            |            |
|--------|---------|------------------------------------------|-------------|------------|------------|------------|
| Q9ULD2 | MTUS1   | VTFSVSPIEATEK                            | S443        | 0.05849275 | 0.55554123 | 0.47702638 |
| Q9ULD2 | MTUS1   | NSGSFPSPSIPR                             | S1268       | 0.17739649 | 0.72508157 | 0.56898248 |
| Q9ULD2 | MTUS1   | QLSTEQAVLQESLEK                          | T1204       | 0.19666621 | 0.65277034 | 0.58169594 |
| Q9ULD2 | MTUS1   | SGSTSSLSYTWTSSSHSDK                      | S199        | 0.54640913 | 0.86954454 | 0.7933521  |
| Q5HYI7 | MTX3    | LTPAEENNSFQRLSP                          | S311        | 0.84156523 | 0.94773974 | 0.94290531 |
| P98088 | MUC5AC  | ATSPQTQSTSSWQK                           | S2769       | 0.07748906 | 5.21218536 | 0.50397847 |
| P98088 | MUC5AC  | CPAPGDTQHSEEAPEPSQEAESGSWER              | S5019       | 0.29627178 | 0.7301595  | 0.65749804 |
| P84157 | MXRA7   | GPSSEGEEDGEGFSFK                         | S128        | 0.07602784 | 0.77597917 | 0.50397847 |
| Q9BQGO | MYBBP1A | EIPSATQSPISK                             | S1163       | 0.11645467 | 0.70437956 | 0.53343618 |
| P10244 | MYBL2   | EEENSEEELAAATTSK                         | S241        | 0.01829097 | 0.57348456 | 0.41830815 |
| P01106 | MYC     | CTSPRSSDTEENVK                           | S344,T350   | 0.63295951 | 0.91717091 | 0.84199017 |
| O75592 | MYCBP2  | SKSDSYTLDPDTLR                           | S2835       | 0.41614123 | 0.87748729 | 0.72383353 |
| O75592 | MYCBP2  | VNSGDTEVGSLLR                            | S3467       | 0.56858174 | 0.83730238 | 0.81219225 |
| Q9P2K5 | MYEF2   | AEVPGATGGDSPHLQPAEPPGEP                  | S17         | 0.68406881 | 1.07310871 | 0.86742746 |
| P35580 | MYH10   | QLHLEGASLESDDTESK                        | S1956       | 0.07630057 | 2.03018206 | 0.50397847 |
| P35580 | MYH10   | GGPISFSSSR                               | S1937       | 0.75806648 | 0.93793304 | 0.90833103 |
| Q7Z406 | MYH14   | LEEGVASDEEAEEAQP GSGSPSEPEGSPPAHPQ       | S1969       | 0.11222006 | 0.84025271 | 0.53343618 |
| P35579 | MYH9    | GAGDGSDSEVDGK                            | S1943       | 0.23729809 | 1.70135172 | 0.6080317  |
| P35579 | MYH9    | QAQQRDELADAIANSSGK                       | S1714       | 0.68873892 | 0.93118078 | 0.86958941 |
| Q15746 | MYLK    | SSTGSPSTPLNAEK                           | S1779       | 0.67125525 | 0.88983928 | 0.86074656 |
| Q92614 | MYO18A  | LEGDSVDSELEDRVDGVK                       | S1970       | 0.02361979 | 1.51273066 | 0.41830815 |
| Q92614 | MYO18A  | SLAPDRSDDEHDPLDNTSRPR                    | S2020       | 0.20252832 | 1.16226201 | 0.58320027 |
| Q92614 | MYO18A  | SSSPTS YWK                               | S2007       | 0.50637981 | 1.04096639 | 0.76766855 |
| Q92614 | MYO18A  | SRDESASETSTPSEHSAAPSPQVEVR               | S145        | 0.82536654 | 0.95515271 | 0.93589378 |
| Q12965 | MYO1E   | NQYVPPHAPGSQR                            | S980        | 0.05527019 | 0.3966974  | 0.47702638 |
| Q9Y411 | MYO5A   | AISPTSATSSGR                             | S600        | 0.30837845 | 1.21628257 | 0.66139614 |
| Q9Y411 | MYO5A   | TSSIADEGT YLDSILR                        | S1652       | 0.3991992  | 1.35095476 | 0.7160132  |
| Q13459 | MYO9B   | VSPAPGASAPETPEDK                         | T1271       | 0.19118728 | 1.29313472 | 0.57584619 |
| Q13459 | MYO9B   | VQEKPDSPGGSTQIQR                         | S1290       | 0.31112961 | 1.1771887  | 0.6619866  |
| Q13459 | MYO9B   | RTSFSTSDVSK                              | S1354       | 0.57037656 | 1.09390329 | 0.81408076 |
| Q13459 | MYO9B   | KPGDASSLPDAGLSPG SQVDSK                  | S1405       | 0.59703717 | 0.80713948 | 0.82370222 |
| Q13459 | MYO9B   | VSPAPGASAPETPEDK                         | T1271,S1267 | 0.84788009 | 0.9609375  | 0.9453218  |
| Q9NZM1 | MYOF    | GPVGTVSEAQLAR                            | S174        | 0.3028144  | 0.8460832  | 0.65956859 |
| P41227 | NAA10   | GNSPPSSGEACREEK                          | S186        | 0.0874682  | 1.40488906 | 0.50672665 |
| Q9BXJ9 | NAA15   | ITVNGDSSAAEELANEI                        | S856        | 0.73186494 | 1.05578859 | 0.89605782 |
| Q147X3 | NAA30   | CPFPAGAAALCCSEDEEEDDEEHGGSRSPAGGESATVAAK | S39,S53     | 0.61366677 | 1.10467714 | 0.83338657 |
| Q147X3 | NAA30   | CPFPAGAAALCCSEDEEEDDEEHGGSR              | S39         | 0.64898568 | 1.01536688 | 0.84958493 |
| Q13765 | NACA    | SPASD YTVFGEAK                           | S114        | 0.16101291 | 0.68393455 | 0.55797736 |
| Q13765 | NACA    | VQGEAVSNIQENTQTPTVQEESSEEEVDETGVEVK      | S166        | 0.37195479 | 1.59853306 | 0.7012243  |
| Q96HR8 | NAF1    | NDQEPPEALDFSDDEK                         | S315        | 0.24466569 | 0.89092964 | 0.61377267 |
| P55209 | NAP1L1  | LDGLVETPGYIESLPR                         | T62         | 0.99448947 | 0.99665668 | 0.99772632 |
| Q99733 | NAP1L4  | EFITGDVEPTDAESEWHSENEEEEEK               | S125        | 0.15040817 | 1.39697406 | 0.55639713 |
| P49321 | NASP    | SVSGTDVQEEREK                            | T248        | 0.37713133 | 1.34386089 | 0.70397848 |
| Q8NEY1 | NAV1    | VNSNSLDLPSSSDTHHASK                      | S808        | 0.39238192 | 1.14272134 | 0.71274438 |
| Q6ZNI1 | NBEAL2  | RISQVSSGTEYNPTEAR                        | S2739       | 0.50190918 | 0.76616574 | 0.76563097 |
| O60934 | NBN     | IPNYQLSPTK                               | S432        | 0.00180538 | 0.60279667 | 0.27314524 |
| Q15021 | NCAPD2  | YQPLASTASDNDFVTPPEPR                     | S1333       | 0.32461514 | 0.72778229 | 0.67145617 |
| Q9BPX3 | NCAPG   | TLHCEGTINSDDDEQESK                       | S674        | 0.35607134 | 0.93082835 | 0.68810579 |
| Q9BPX3 | NCAPG   | CQTAEADESSEDHVEPPESEM                    | S973        | 0.98680088 | 0.99572327 | 0.99494412 |
| Q15003 | NCAPH   | DAPSLVEEVGHVADGSA TEMGTTK                | T203        | 0.04057063 | 0.66783716 | 0.45365343 |
| Q09161 | NCBP1   | TS DANETEDHLES LICK                      | T21         | 0.38258826 | 1.14909315 | 0.70884547 |
| Q09161 | NCBP1   | KTS DANETEDHLES LICK                     | S22         | 0.67860883 | 0.84895717 | 0.8627275  |
| Q09161 | NCBP1   | TS DANETEDHLES LICK                      | S22         | 0.80886731 | 1.03746594 | 0.92670839 |
| P16333 | NCK1    | RKPSVPDSASPADDSFVDPGER                   | S85         | 0.8731458  | 0.93221831 | 0.95554946 |
| P19338 | NCL     | VVVSPTK                                  | T69         | 0.05627799 | 0.7371756  | 0.47702638 |
| P19338 | NCL     | GFGFVDFNSEEDAK                           | S619        | 0.1010822  | 1.19553159 | 0.52414255 |
| P19338 | NCL     | LELQGRGSPNAR                             | S563        | 0.54318417 | 1.31274662 | 0.79133937 |
| Q9Y6Q9 | NCOA3   | TPHDELEDINASPEMR                         | S214        | 0.67155227 | 1.09223035 | 0.86074656 |
| Q8NI08 | NCOA7   | ECLSLDPEER                               | S441        | 0.12403068 | 1.31581069 | 0.53975675 |
| Q8NI08 | NCOA7   | VLSSTSEDEPGVVK                           | S208        | 0.38851576 | 1.15813063 | 0.71060254 |
| Q8NI08 | NCOA7   | VLSSTSEDEPGVVK                           | S208,S211   | 0.48900308 | 1.3160122  | 0.76101518 |
| O75376 | NCOR1   | MPIEDSSPEK                               | S1196       | 0.02529133 | 0.6370733  | 0.41830815 |
| O75376 | NCOR1   | HEAPSSPISGQPCGDDQNASPSK                  | S158,S172   | 0.10150145 | 0.63152585 | 0.52414255 |
| O75376 | NCOR1   | AQLSPGIYDDTSAR                           | S1472       | 0.26567488 | 0.71397906 | 0.63400981 |
| O75376 | NCOR1   | HEAPSSPISGQPCGDDQNASPSK                  | S158        | 0.30829504 | 1.12054002 | 0.66139614 |
| O75376 | NCOR1   | SHVSSPEYIPSPQVPVVEK                      | S2151       | 0.77041735 | 1.0669302  | 0.91329931 |
| Q9Y618 | NCOR2   | IIGEDSPSLDR                              | S1259       | 0.01808948 | 0.63104657 | 0.41830815 |
| Q9Y618 | NCOR2   | SLGYHGSSYSPGVEPVSPVSSPLTHDK              | S2065,Y2056 | 0.05656366 | 0.68286247 | 0.47702638 |
| Q9Y618 | NCOR2   | SLGYHGSSYSPGVEPVSPVSSPLTHDK              | S2065,S2068 | 0.06219892 | 0.54726843 | 0.47702638 |
| Q9Y618 | NCOR2   | TSVLGGGEGDIEPVSPPEGMTEPGHSR              | S2234       | 0.13686704 | 0.70309206 | 0.54797298 |
| Q9Y618 | NCOR2   | SPGNTSQPPAFFSK                           | S2269       | 0.18771942 | 0.66174223 | 0.57474321 |
| Q9Y618 | NCOR2   | SPAPGLASGRPPSSVSHSEGD CNR                | S2424       | 0.35634233 | 0.68452401 | 0.68810579 |
| Q9Y618 | NCOR2   | LEPVSPSPPHTDPELELVPR                     | S149,S152   | 0.50732103 | 1.21950716 | 0.76766855 |
| Q9NXR1 | NDE1    | NLVYDQSPNR                               | S282        | 0.02322237 | 0.49121064 | 0.41830815 |
| Q9NXR1 | NDE1    | RPSSTSVP LGDK                            | S306        | 0.1488872  | 0.79141311 | 0.55352644 |
| Q96MG7 | NDNL2   | GPGGSQGSQGPSQGAR                         | S64         | 0.02479303 | 0.7891284  | 0.41830815 |
| Q92597 | NDRG1   | SHTSEGAHLDTNPSGAAGNSAGPK                 | T366        | 0.13005801 | 1.80803951 | 0.54344847 |
| Q92597 | NDRG1   | TASGSSVTSLDGTR                           | S330        | 0.7479324  | 1.08462867 | 0.90350024 |
| Q9UGV2 | NDRG3   | THSTSSSLGSGESPFSR                        | S331        | 0.37418325 | 0.71775839 | 0.7024407  |
| Q9UGV2 | NDRG3   | THSTSSSLGSGESPFSR                        | T332        | 0.43037794 | 0.73627195 | 0.73031829 |
| Q96PU5 | NEDD4L  | SLSSPTVTLAPLEGAK                         | S446        | 0.59267171 | 1.22144115 | 0.82284423 |

|        |         |                                    |           |            |            |            |
|--------|---------|------------------------------------|-----------|------------|------------|------------|
| Q969S2 | NEIL2   | FDLDEEMGPPGSSPTPEPPQK              | S68       | 0.47188614 | 0.88948856 | 0.75004241 |
| Q96PY6 | NEK1    | TCSLPDLK                           | S1052     | 0.60956052 | 1.06412226 | 0.83062316 |
| Q8TD19 | NEK9    | HCDSINSDFGSEGGCGDSSPGPSASQGR       | S29       | 0.18704352 | 0.71135364 | 0.57474321 |
| Q8TD19 | NEK9    | VASEAPLEHKPQVEASSPR                | S869      | 0.97463795 | 0.99548533 | 0.98993501 |
| P18615 | NELFE   | SLSEQPVMDDTATATEQAK                | S49       | 0.12198885 | 0.65834797 | 0.53793802 |
| P18615 | NELFE   | SLYESFVSSDR                        | S131      | 0.37694865 | 0.8351637  | 0.70397848 |
| P18615 | NELFE   | SISADDDLQESSR                      | S115      | 0.4282272  | 0.86934232 | 0.72966058 |
| O60524 | NEMF    | NPYLLSEEDDDVDGDVNVK                | S471      | 0.20742235 | 1.90184662 | 0.59203789 |
| O60524 | NEMF    | KLPSDSGDLEALEGK                    | S831      | 0.28708312 | 1.13855739 | 0.65007167 |
| P48681 | NES     | DGESDGFADDEESGEEGEDQEEGREPGAGR     | S1418     | 0.81701669 | 1.07647091 | 0.93141526 |
| P48681 | NES     | QEASTGQSPDHASLAPPLSPDHSLEAK        | S471      | 0.88282096 | 0.94395114 | 0.95761744 |
| Q7Z628 | NET1    | RASGLSTEGATGPSADTSGSELDGR          | S21       | 0.09549021 | 0.62971399 | 0.51670111 |
| P21359 | NF1     | SFDHLISDTK                         | S2543     | 0.0893845  | 1.33834587 | 0.51018936 |
| P21359 | NF1     | SMSLDMGQPSQANTK                    | S2523     | 0.37637507 | 1.17457737 | 0.70397848 |
| P21359 | NF1     | GSEGYLAATYPTVGQTSR                 | S2515     | 0.65590056 | 0.92708629 | 0.85263945 |
| P35240 | NF2     | MSFSSLK                            | S12       | 0.46896927 | 0.84321755 | 0.74878542 |
| P35240 | NF2     | RLSMEIEK                           | S518      | 0.79452057 | 0.95952091 | 0.92361025 |
| Q12968 | NFATC3  | KTSEDQAAILPGK                      | S344      | 0.28454941 | 0.72375049 | 0.64892143 |
| Q12857 | NFIA    | SPGSGSQSSGWHEVEPGMPSPTTLK          | T322,S300 | 0.02526451 | 0.68719382 | 0.41830815 |
| Q12857 | NFIA    | SPGSGSQSSGWHEVEPGMPSPTTLK          | S300      | 0.71736359 | 1.17534251 | 0.88806482 |
| P08651 | NFIC    | NWTEDEMEGGISSPVK                   | S323      | 0.0109966  | 0.75802804 | 0.37969115 |
| P08651 | NFIC    | SPFNPSPPQDSDR                      | S339      | 0.22064531 | 0.88060606 | 0.60598282 |
| P08651 | NFIC    | SPFNPSPPQDSDR                      | S333      | 0.33318287 | 0.86278896 | 0.67622969 |
| Q15653 | NFKBIB  | TPDTNHTPVALYPSDLEK                 | S183      | 0.74003979 | 0.96989851 | 0.89994504 |
| Q12986 | NFX1    | SESGTDLREHSPSESEK                  | S150      | 0.02362875 | 1.60598504 | 0.41830815 |
| P23511 | NFYA    | EKDSPHMQDPNQADEEAMTQIIR            | S326      | 0.25224189 | 1.44437756 | 0.61962985 |
| Q8NEJ9 | NGDN    | EQYSDAPEEIR                        | S214      | 0.12087028 | 0.69835101 | 0.53774744 |
| Q8NEJ9 | NGDN    | LSEDEEEDAEEDDQSEASGK               | S142      | 0.21297922 | 0.72558038 | 0.59975506 |
| Q6T4R5 | NHS     | VQQEIDSDSPVAR                      | S415      | 0.61199235 | 0.91679538 | 0.83176861 |
| Q9BYG3 | NIFK    | TVDSQGPPTVCTPTFLER                 | T234,T238 | 0.09428954 | 0.50368386 | 0.51670111 |
| Q9BYG3 | NIFK    | SQVAELNDDDK                        | S247      | 0.30667773 | 0.70070854 | 0.66139614 |
| Q9BYG3 | NIFK    | SQVAELNDDDKDEIVFK                  | S247      | 0.4346099  | 0.8569869  | 0.73192983 |
| Q9BYG3 | NIFK    | EEIQETQTPTHSR                      | T279      | 0.5891312  | 1.11580306 | 0.82177718 |
| Q6KC79 | NIPBL   | AAMYDIISPSK                        | S350      | 0.01464337 | 0.51849676 | 0.41362115 |
| Q6KC79 | NIPBL   | AITSLLLGGGSPK                      | S2658     | 0.49343191 | 1.11991897 | 0.76351366 |
| Q8NSF7 | NKAP    | IGELGAPEVWGLSPK                    | S149      | 0.14638133 | 1.50555427 | 0.55352644 |
| P30414 | NKTR    | VEETSPGNGAR                        | S1146     | 0.1706945  | 1.20260842 | 0.56526141 |
| P30414 | NKTR    | ILIPSDIESSK                        | S463      | 0.28722899 | 0.7587025  | 0.65007167 |
| Q9NX02 | NLRP2   | ENLPEVNTASESDAEVER                 | S671      | 0.03742017 | 0.60531043 | 0.44815912 |
| Q96D46 | NMD3    | DSAIPIVSDTDDDEGAPR                 | T470      | 0.7294923  | 0.95371051 | 0.89480162 |
| Q96D46 | NMD3    | DSAIPIVSDTDDDEGAPR                 | S468      | 0.78814104 | 1.03987426 | 0.92123384 |
| P15531 | NME1    | NIIHGSDSVEAEK                      | S120      | 0.03369534 | 1.70518484 | 0.43874459 |
| O60361 | NME2P1  | NIIHGSDSVK                         | S105      | 0.03874646 | 2.63057337 | 0.44872753 |
| Q9HAN9 | NMNAT1  | LEASDCDHQQNSPTLERPGR               | S117      | 0.47060128 | 0.84622068 | 0.74973768 |
| P30419 | NMT1    | GGLSPANDTGAK                       | S47       | 0.03470292 | 0.73642534 | 0.43874459 |
| Q9ULX3 | NOB1    | GEDVPSSEEEEEENGFEDE                | S184      | 0.10875478 | 0.67577828 | 0.53337143 |
| Q9ULX3 | NOB1    | KDDSDDDGGGWITPSNIK                 | S201      | 0.32734898 | 0.79021711 | 0.67305029 |
| Q9ULX3 | NOB1    | DDSDDDGGGWITPSNIK                  | S201      | 0.80213587 | 1.09559948 | 0.92455018 |
| Q76FK4 | NOL8    | VSCHSDDDIMR                        | S365      | 0.73764471 | 0.91617235 | 0.89895555 |
| P78316 | NOP14   | FGEYNSNMSPEEK                      | S96       | 0.08360908 | 0.45203202 | 0.50397847 |
| P78316 | NOP14   | RFGYNSNMSPEEK                      | S96       | 0.08769361 | 0.68725946 | 0.56072665 |
| P46087 | NOP2    | GTDTQTPAVLSPSK                     | S732      | 0.07106217 | 0.59573579 | 0.49571338 |
| P46087 | NOP2    | EVTPESGPPK                         | T195      | 0.18199808 | 1.3554007  | 0.57200583 |
| P46087 | NOP2    | GPQPPTVSPIR                        | S786      | 0.23786367 | 0.68504854 | 0.60861996 |
| O00567 | NOP56   | EELMSSDLEETAGSTSIPK                | S520      | 0.55622685 | 0.93186044 | 0.79988187 |
| O00567 | NOP56   | EELMSSDLEETAGSTSIPK                | S569      | 0.87344109 | 0.96417278 | 0.95556896 |
| O00567 | NOP56   | EELMSSDLEETAGSTSIPK                | S570      | 0.97872115 | 1.00327869 | 0.99197047 |
| O00567 | NOP56   | EELMSSDLEETAGSTSIPK                | S569,S570 | 0.99186113 | 0.99538516 | 0.99691668 |
| Q9Y2X3 | NOP58   | EELMSSDLEETAGSTSIPK                | S502      | 0.01145333 | 1.87855518 | 0.38671818 |
| Q9Y2X3 | NOP58   | EELMSSDLEETAGSTSIPK                | S502,S514 | 0.03851774 | 0.6005488  | 0.44815912 |
| Q9Y2X3 | NOP58   | EELMSSDLEETAGSTSIPK                | S514      | 0.25289983 | 0.73092782 | 0.62080328 |
| P06748 | NPM1    | LLSISGK                            | S137      | 0.08499295 | 0.71505325 | 0.50397847 |
| P06748 | NPM1    | CGSGPVHISGQHLVAVEEDAEESEEEEEEDVK   | S125      | 0.28433824 | 1.72152354 | 0.64892143 |
| P06748 | NPM1    | GPSSVEDIK                          | S243      | 0.43133334 | 1.13146998 | 0.73034023 |
| P15559 | NQO1    | EGHLSPDIVAEQK                      | S82       | 0.54036136 | 1.09823893 | 0.78956492 |
| P10588 | NR2F6   | AAEDDSASPPGAASDAEPGDEERPLQVDCVVCCK | S40       | 0.00079295 | 0.40765531 | 0.25274253 |
| Q9UHY1 | NRBP1   | TPTPEPAEVETR                       | T433      | 0.32007799 | 0.81949652 | 0.66890084 |
| O43847 | NRD1    | RGSLSNAGDPEIVK                     | S94       | 0.65581047 | 0.89365452 | 0.85263945 |
| O43847 | NRD1    | RGSLSNAGDPEIVK                     | S96       | 0.68696636 | 0.89329733 | 0.86918153 |
| Q96L73 | NSD1    | AASPHQVTQAQDEK                     | S2471     | 0.23208662 | 0.75313457 | 0.6080317  |
| Q9UNZ2 | NSFL1C  | KSPNELVDDLK                        | S114      | 0.0567201  | 1.49847102 | 0.47702638 |
| Q9UNZ2 | NSFL1C  | SPNELVDDLK                         | S114      | 0.08552698 | 1.29437043 | 0.50397847 |
| Q9UNZ2 | NSFL1C  | VTSFRDLHDQDEDEEEEEGQR              | T73       | 0.10272829 | 1.89080404 | 0.52414255 |
| Q9UNZ2 | NSFL1C  | LGSTAPQVLSTSSPAQQAENEAK            | S272      | 0.75664331 | 0.91668101 | 0.90833103 |
| Q08J23 | NSUN2   | AGEPNSPDAAEANSPPVDTAGCDPAGVHPPR    | S751      | 0.08653373 | 0.7943208  | 0.50489821 |
| Q08J23 | NSUN2   | AGEPNSPDAAEANSPPVDTAGCDPAGVHPPR    | S743,S751 | 0.41818733 | 1.10961288 | 0.72427252 |
| Q08J23 | NSUN2   | ESTQLSPADLTGKPTDPSK                | S456      | 0.45379266 | 1.35747793 | 0.73871138 |
| Q08J23 | NSUN2   | LESPSTFGTGDTEIAHATEDLENNGSK        | S473      | 0.61056858 | 1.11555366 | 0.83095214 |
| Q08J23 | NSUN2   | AGEPNSPDAAEANSPPVDTAGCDPAGVHPPR    | S743      | 0.67451636 | 1.06057495 | 0.86131187 |
| Q63ZYG | NSUN5P2 | ASAPERTPSAPK                       | T258,S260 | 0.72676006 | 0.93109311 | 0.89359574 |
| Q9H1E3 | NUCKS1  | VVDYSQFQESDDADEDYGRDSGPPTK         | S19       | 0.11771898 | 1.8127786  | 0.53556693 |

|        |         |                                               |           |            |            |            |
|--------|---------|-----------------------------------------------|-----------|------------|------------|------------|
| Q9H1E3 | NUCKS1  | EEDEEPSPEPK                                   | S214      | 0.17995221 | 1.18109389 | 0.56962812 |
| Q9H1E3 | NUCKS1  | VVDYSQFQESDDADEDYGR                           | S19       | 0.20095439 | 1.12258494 | 0.58195492 |
| Q9H1E3 | NUCKS1  | EMLMEDVGSSEEEQEEDEAPFQEK                      | S113      | 0.24961653 | 1.15515654 | 0.61802971 |
| Q9H1E3 | NUCKS1  | ATVTPSPVK                                     | T179,S181 | 0.4312351  | 0.78920863 | 0.73034023 |
| Q9H1E3 | NUCKS1  | TPSPKEEDEEPSPEPK                              | S214      | 0.50406662 | 1.465698   | 0.76766855 |
| Q9H1E3 | NUCKS1  | ATVTPSPVK                                     | S181      | 0.91760254 | 1.04249413 | 0.96969105 |
| Q9Y266 | NUDC    | NGSLDSPGKQDTEDEEEDEK                          | S139      | 0.64966107 | 1.24959055 | 0.84958493 |
| Q7Z417 | NUFIP2  | NLSSDEATNPISR                                 | S112      | 0.19516895 | 0.83978495 | 0.58045066 |
| Q7Z417 | NUFIP2  | DYEIESQNPLASPTNTLLGSAK                        | S629      | 0.25832911 | 1.43666455 | 0.62621067 |
| Q7Z417 | NUFIP2  | TIQNSSVSPSSSSSSTGETQTQSSSR                    | S379      | 0.36683805 | 0.68313848 | 0.69762023 |
| Q7Z417 | NUFIP2  | NDSWGSFDLR                                    | S652      | 0.40402023 | 1.12553091 | 0.7160132  |
| Q7Z417 | NUFIP2  | GADNDGSGSESGYTTPK                             | S212      | 0.5754135  | 0.9451581  | 0.81432655 |
| Q14980 | NUMA1   | RVSLEPHQPGTPESK                               | S1991     | 0.13368938 | 0.5456744  | 0.5475768  |
| Q14980 | NUMA1   | RVSLEPHQPGTPESK                               | T2000     | 0.19806685 | 0.73447741 | 0.58169594 |
| Q14980 | NUMA1   | VSLEPHQPGTPESK                                | T2000     | 0.28513796 | 0.7241412  | 0.64905165 |
| Q14980 | NUMA1   | TQPDPGTSVPGEPASISQR                           | S1757     | 0.54116471 | 0.89302885 | 0.79040342 |
| Q9Y6R0 | NUMBL   | AEAAAAPTAPGPAQPGHVSPTATTSPGKEK                | S263,S270 | 0.02275761 | 0.48742524 | 0.41830815 |
| Q9Y6R0 | NUMBL   | AEAAAAPTAPGPAQPGHVSPTATTSPGKEK                | T269      | 0.67419222 | 1.17919729 | 0.86131187 |
| P49790 | NUP153  | NTSLPPLWSPEAER                                | S209      | 0.2815389  | 0.72788163 | 0.6455595  |
| O75694 | NUP155  | AAPQSPSPVK                                    | S994      | 0.104333   | 0.77320872 | 0.52476522 |
| Q8TEM1 | NUP210  | DLAVPAALTPR                                   | T1844     | 0.29724868 | 0.77406117 | 0.65749804 |
| P35658 | NUP214  | SAQSSSPVPMVMQK                                | S657      | 0.14851983 | 0.78171711 | 0.55352644 |
| P35658 | NUP214  | SPGSTPTTPTSSQAPQK                             | T434,T436 | 0.22709668 | 0.81910246 | 0.6080317  |
| P35658 | NUP214  | SPGSTPTTPTSSQAPQK                             | S430      | 0.75643237 | 1.05618831 | 0.90833103 |
| Q9UKX7 | NUP50   | VAAEQSPSLFGSTK                                | S221      | 0.08589137 | 0.47406213 | 0.50397847 |
| Q9BWZ7 | NUP85   | RPVHGSEDTLQDDDIETTK                           | S617      | 0.12577207 | 0.73180757 | 0.5403576  |
| Q99567 | NUP88   | EDVEVAESPLR                                   | S517      | 0.04459327 | 0.74822232 | 0.45441331 |
| P52948 | NUP98   | ADTSEQICSPR                                   | S1023     | 0.04664782 | 0.76418191 | 0.45625798 |
| P52948 | NUP98   | DSENLASPSEYPENGER                             | S623      | 0.07780313 | 0.73309157 | 0.50397847 |
| P52948 | NUP98   | NLNNNSLFSVYNR                                 | S612      | 0.57437269 | 0.90821238 | 0.81432655 |
| P52948 | NUP98   | YGLQDSDSEEEHPSK                               | S888      | 0.91631199 | 1.0090703  | 0.96930175 |
| Q9NX40 | OCIAD1  | KLENSPLGEALR                                  | S108      | 0.30919576 | 0.72710674 | 0.66139614 |
| Q9NX40 | OCIAD1  | LENSPLGEALR                                   | S108      | 0.39140207 | 0.6579669  | 0.71204522 |
| Q16625 | OCLN    | RTEQDHYETDYTTGGESCELEEDWIR                    | S408      | 0.23027809 | 5.35386278 | 0.6080317  |
| Q16625 | OCLN    | YSSGGNFETPSK                                  | S370      | 0.83573333 | 1.06023804 | 0.93968841 |
| Q9NZT2 | OGFR    | KVEEESGPGDPDHEASTQGR                          | S315      | 0.22388428 | 1.22049222 | 0.6080317  |
| Q9NZT2 | OGFR    | SVEPQDAGPLER                                  | S349      | 0.26907451 | 0.83414925 | 0.63502787 |
| Q9NZT2 | OGFR    | VEEESGPGDPDHEASTQGR                           | S315      | 0.4898093  | 1.18059856 | 0.76192558 |
| Q9NZT2 | OGFR    | SQGDEAGGHGEDRPEPLSPK                          | S378      | 0.5562477  | 1.11424904 | 0.79988187 |
| Q15619 | OR1C1   | NLTVVR                                        | T7        | 0.30026283 | 0.91214703 | 0.65817287 |
| Q13415 | ORC1    | VAFSEITSPSK                                   | S273      | 0.00264492 | 0.20565904 | 0.27314524 |
| Q13415 | ORC1    | SAESPSWTPAEHVAK                               | S199      | 0.0064888  | 0.39403414 | 0.34322215 |
| P22059 | OSBP    | MLAESDESDEESVSQTDK                            | S193      | 0.02054981 | 1.70484803 | 0.41830815 |
| P22059 | OSBP    | RTGSNISGASSDISLDEQYK                          | T377,S382 | 0.03989363 | 1.54964192 | 0.44899888 |
| P22059 | OSBP    | SLSELESK                                      | S240      | 0.1471953  | 1.74521007 | 0.55352644 |
| P22059 | OSBP    | MLAESDESDEESVSQTDK                            | S190,S193 | 0.5248494  | 1.38762398 | 0.7781237  |
| Q9BXW6 | OSBPL1A | SFEEEGHGLSR                                   | S499      | 0.02726408 | 0.7084238  | 0.41837587 |
| Q9H4L5 | OSBPL3  | LHSSNPNTLDFGEEK                               | S303      | 0.78580704 | 1.07707618 | 0.92039443 |
| Q96FW1 | OTUB1   | QEPLGSDSEGVNCLAYDEAIMAQDQR                    | S16       | 0.40605135 | 1.45406643 | 0.71641437 |
| Q01804 | OTUD4   | ESNYFGLSPEER                                  | S442      | 0.00681596 | 0.54494756 | 0.34322215 |
| Q01804 | OTUD4   | EESSEDEENSNILR                                | S1023     | 0.39959764 | 1.09233049 | 0.7160132  |
| Q96G74 | OTUD5   | QAPGVAVGGGSPEREVEVGAGYSEDEYEA AAAAR           | S165,S177 | 0.10751768 | 0.66942548 | 0.53050271 |
| Q96G74 | OTUD5   | ATSPVLVLYPALECR                               | S508      | 0.66761167 | 1.3456148  | 0.85857154 |
| Q8N573 | OXR1    | VVSSTSEEEAFTEK                                | S202      | 0.10188411 | 0.77813019 | 0.52414255 |
| O95747 | OXR1    | TEDGGWEVSDDFDEESEEGK                          | S339      | 0.18278059 | 1.92602821 | 0.57200583 |
| Q86U42 | PABPN1  | APPGAPGPGSGGAPGSGQEEEEEPGLVEGDPGDGAIEDPELEAIK | S95       | 0.02740566 | 1.32152919 | 0.41837587 |
| Q6VY07 | PACS1   | LTSTSAITR                                     | S320      | 0.78684713 | 1.16068162 | 0.92069713 |
| Q9UKS6 | PACSN3  | DGTAPPQSPGSPGTGQDEEWSDEESPRK                  | S354      | 0.74591102 | 1.04891957 | 0.90295872 |
| Q9BTK6 | PAGR1   | DLFSLDSEDPSPAPPLR                             | S237      | 0.35214255 | 0.86522484 | 0.68437095 |
| Q13153 | PAK1    | DVATSPISPTENNTTTPDALTR                        | T230      | 0.29209863 | 0.7196467  | 0.65323876 |
| Q13177 | PAK2    | YLSFTPEK                                      | S141      | 0.30942763 | 0.71760797 | 0.66139614 |
| Q13177 | PAK2    | GTEAPAVVTEEDDDEETAPPVIAPRPDHTK                | T169      | 0.38955215 | 1.20448508 | 0.71060254 |
| Q8WX93 | PALLD   | SRDSGDENEPIQER                                | S1121     | 0.05115414 | 0.72439844 | 0.45652016 |
| Q8WX93 | PALLD   | IASDEIQGTK                                    | S893      | 0.34068561 | 0.8054567  | 0.67842858 |
| Q9BZ23 | PANK2   | DRLGYSYSGPVSVR                                | S191      | 0.36187434 | 0.82212545 | 0.69277111 |
| Q9BZ23 | PANK2   | LGSYSGPVSVR                                   | S189      | 0.5603386  | 0.89260658 | 0.80475652 |
| Q9BWT3 | PAPOLG  | RLSLDSSCLDSSR                                 | S525      | 0.17252753 | 0.41885263 | 0.56561687 |
| Q8TEW0 | PARD3   | FSPDSQYIDNR                                   | S383      | 0.08222779 | 0.65937396 | 0.50397847 |
| Q8TEW0 | PARD3   | SPGSPPELPIETALDDR                             | S692      | 0.27583751 | 0.75168165 | 0.64101511 |
| Q8TEW0 | PARD3   | ESVSTASDQPSHSLR                               | S973      | 0.49466086 | 1.06122075 | 0.76357885 |
| Q8TEW0 | PARD3   | ISHLYSGIYGLDESPSR                             | S728      | 0.62746086 | 0.88001907 | 0.83899389 |
| Q8TEW0 | PARD3   | AGSPSRDVGPSLGLK                               | S873      | 0.85516203 | 1.05955354 | 0.94852754 |
| Q8TEW0 | PARD3   | SMDLGIADETK                                   | S852      | 0.98542144 | 0.99889538 | 0.9949188  |
| Q9BYG5 | PARD6B  | HGAGSGCLGTMEVK                                | S11       | 0.59326579 | 0.92758449 | 0.82284423 |
| Q86W56 | PARG    | QESCLGNPPFEK                                  | S286      | 0.06998911 | 0.8469588  | 0.49571338 |
| Q86W56 | PARG    | SPQNDHSDTDESEENRDNQQFLTTVK                    | S197      | 0.36993865 | 0.8194352  | 0.70105255 |
| O95453 | PARN    | NNSFTAPSTVGK                                  | S557      | 0.2552486  | 0.66950765 | 0.62390075 |
| O95453 | PARN    | ELSPAGSISK                                    | S619      | 0.96126176 | 0.99136364 | 0.98502328 |
| Q86TB9 | PATL1   | STSPIIGSPVVR                                  | S179      | 0.48381749 | 1.19242705 | 0.75785402 |
| Q96I20 | PAWR    | STTSVSEEDVSSR                                 | S231      | 0.39655092 | 1.50534771 | 0.7160132  |
| Q9Y5B6 | PAXB1   | LVRENDASDDEEDDEK                              | S262      | 0.58289887 | 1.12253386 | 0.81845981 |

|        |         |                                                          |                |            |            |            |
|--------|---------|----------------------------------------------------------|----------------|------------|------------|------------|
| Q96KB5 | PBK     | GLSHSPWAVK                                               | S59            | 0.56541409 | 0.74494233 | 0.80934585 |
| Q15154 | PCM1    | YMSQMSVPEQAELEK                                          | S93            | 0.00939833 | 0.35902899 | 0.37254089 |
| Q15154 | PCM1    | WVSELSVVEEK                                              | S991           | 0.01263154 | 0.58195726 | 0.39919401 |
| Q15154 | PCM1    | RVTNDISPESSPGVGR                                         | S65            | 0.01729607 | 1.19617785 | 0.41830815 |
| Q15154 | PCM1    | VTNDISPESSPGVGR                                          | S65,S69        | 0.03078012 | 0.62248636 | 0.43445387 |
| Q15154 | PCM1    | ILEDHGSPAGEIDDEDK                                        | S1730          | 0.13505054 | 0.8013013  | 0.5475768  |
| Q15154 | PCM1    | SDGSENLCTPQQSR                                           | S869           | 0.47315086 | 1.15754348 | 0.75075773 |
| Q15154 | PCM1    | KFGVESDK                                                 | S56            | 0.5899861  | 1.06719818 | 0.82197092 |
| Q15154 | PCM1    | KDEETESEYDSEHENSEPVTNIR                                  | S537           | 0.64378713 | 0.88993644 | 0.84760107 |
| Q15154 | PCM1    | VTNDISPESSPGVGR                                          | S65            | 0.64621435 | 0.8858739  | 0.84855908 |
| Q15154 | PCM1    | RVTNDISPESSPGVGR                                         | S65,S68        | 0.79088133 | 1.09073651 | 0.92210365 |
| Q15154 | PCM1    | RILEDHGSPAGEIDDEDK                                       | S1730          | 0.87735884 | 1.01867912 | 0.95556965 |
| Q8WW12 | PCNP    | TLSVAAAFNEDESEPEEMPPEAK                                  | S119           | 0.27520301 | 2.05510304 | 0.64019666 |
| Q8WW12 | PCNP    | DTPTSAGPNSFNK                                            | S147           | 0.88128457 | 1.03536346 | 0.95761744 |
| P49585 | PCYT1A  | TSPPCSANLSR                                              | T342,S347      | 0.37193654 | 1.17271922 | 0.17012243 |
| P49585 | PCYT1A  | MLQAISPKQSPSSSPTTR                                       | T325,S315,S319 | 0.3734559  | 1.39029024 | 0.70215671 |
| P49585 | PCYT1A  | AAAYDISEDEED                                             | S362           | 0.38273295 | 1.61841838 | 0.70884547 |
| Q9Y5K3 | PCYT1B  | MLQALSPK                                                 | S315           | 0.71919211 | 0.90027866 | 0.88953552 |
| Q13442 | PDAP1   | SLDSEDESEDDYQQK                                          | S63            | 0.5316502  | 0.81937826 | 0.78441777 |
| Q53EL6 | PDCD4   | SGLTVPTSPK                                               | T93            | 0.00197688 | 1.62573099 | 0.27314524 |
| Q53EL6 | PDCD4   | RFVSEGDGGR                                               | S457           | 0.19323464 | 3.59828942 | 0.57728191 |
| O14737 | PDCD5   | VMDSDEDDDY                                               | S119           | 0.78836881 | 0.89337404 | 0.92123384 |
| Q08499 | PDE4D   | DSGSQVEEDTSCSDSK                                         | S754           | 0.04138534 | 0.875      | 0.45441331 |
| Q08499 | PDE4D   | EWYQSTIPQSPAPDDPEEGR                                     | S715           | 0.36404483 | 0.61538929 | 0.69576604 |
| O60658 | PDE8A   | RLSGNEVLTSK                                              | S457           | 0.67218857 | 1.06503874 | 0.86092132 |
| P29803 | PDHA2   | YHGHSMSDPGVSYR                                           | S291,S298      | 0.03422173 | 0.19161949 | 0.43874459 |
| P29803 | PDHA2   | YHGHSMSDPGVSYR                                           | Y287           | 0.12765328 | 0.59427023 | 0.5403576  |
| P29803 | PDHA2   | YHGHSMSDPGVSYR                                           | S291           | 0.28489234 | 0.68604959 | 0.68492143 |
| O00151 | PDLIM1  | VWSPLVTEEGK                                              | S90            | 0.57701705 | 0.86844572 | 0.81432655 |
| O15530 | PDPK1   | ANSFVGTAAQVYVSPPELLTEK                                   | S241           | 0.76930881 | 1.15302263 | 0.91329931 |
| Q29RF7 | PDS5A   | AAVGQSPGSGLEAGNAK                                        | S1305          | 0.11528434 | 0.80830537 | 0.53843618 |
| Q9NTI5 | PDS5B   | METVSNASSSNPSPGR                                         | S1166          | 0.04968843 | 0.59630819 | 0.45652016 |
| Q9NTI5 | PDS5B   | EDILENEDEQNSPPKK                                         | S1283          | 0.08155313 | 0.89638259 | 0.50397847 |
| Q9NTI5 | PDS5B   | AESPESAIESTQSTPQK                                        | T1370,S1358    | 0.08496995 | 0.44322939 | 0.50397847 |
| Q9NTI5 | PDS5B   | AESPESAIESTQSTPQK                                        | S1361          | 0.12892474 | 1.26809211 | 0.54214506 |
| Q9NTI5 | PDS5B   | RGHTASESEDEQQWPEEK                                       | S1257          | 0.17175623 | 0.87344398 | 0.56561687 |
| Q9NTI5 | PDS5B   | AESPESAIESTQSTPQK                                        | S1358          | 0.24304897 | 1.28376777 | 0.61323126 |
| Q9NTI5 | PDS5B   | GHTASESEDEQQWPEEK                                        | S1257          | 0.29284258 | 0.66247676 | 0.6544775  |
| Q6P996 | PDXDC1  | GSDALSETSSVSHIEDLEK                                      | S718           | 0.07345096 | 0.5614193  | 0.49894498 |
| Q15121 | PEA15   | DIIRQPSSEIIIK                                            | S116           | 0.00955312 | 2.2630118  | 0.37254089 |
| P30086 | PEBP1   | NRPTSISWDGLDLSGK                                         | S52            | 0.88551172 | 1.03286853 | 0.95812202 |
| Q8IZL8 | PELP1   | GADTAPTLAPEALPSQGEVEREGESPAAGPPPQELVEEESAPPTLLEEETEDGSDK | S1033          | 0.09644611 | 3.99627489 | 0.51801227 |
| Q8IZL8 | PELP1   | EGESPAAGPPPQELVEEESAPPTLLEEETEDGSDK                      | S1043          | 0.23545668 | 1.18885921 | 0.6080317  |
| Q8IZL8 | PELP1   | EGESPAAGPPPQELVEEESAPPTLLEEETEDGSDK                      | S1073          | 0.40362834 | 1.03730664 | 0.7160132  |
| O43933 | PEX1    | SQSGEDEMNPQGPPIK                                         | S1211          | 0.1375969  | 0.82432327 | 0.54797298 |
| O75381 | PEX14   | SPSPSSPAAVNHSSSDISPVSNSTSSSPGK                           | S275           | 0.47587909 | 1.50650219 | 0.75249201 |
| P40855 | PEX19   | NATDLQNSSMSEELTK                                         | S147           | 0.02223114 | 0.50964493 | 0.41830815 |
| Q16875 | PFKFB3  | RNSVTPLASPEPTK                                           | S461           | 0.08088198 | 0.4172926  | 0.50397847 |
| Q16875 | PFKFB3  | RNSVTPLASPEPTK                                           | S461,S467      | 0.08958666 | 0.2811734  | 0.51018936 |
| Q01813 | PFKP    | SFAGNLNTYK                                               | S386           | 0.32481261 | 0.84761905 | 0.67146136 |
| Q01813 | PFKP    | GRSFAGNLNTYK                                             | S386           | 0.74248008 | 1.09954088 | 0.90061831 |
| P07737 | PFN1    | DSPSVVAAVPGK                                             | S30            | 0.54247262 | 0.86012479 | 0.79120965 |
| P18669 | PGAM1   | SYDVPPPMPEDPHPFYSNISK                                    | S118           | 0.51883557 | 1.20276498 | 0.77588784 |
| O00264 | PGRMC1  | GDQPAASGSDDDDEPPLPR                                      | S57            | 0.49758348 | 1.12449799 | 0.76446134 |
| O00264 | PGRMC1  | EGEPTVYSDEEPEKDESAR                                      | S181           | 0.55549266 | 1.21603427 | 0.79946374 |
| O00264 | PGRMC1  | EGEPTVYSDEEPEK                                           | S181           | 0.64702982 | 1.08132147 | 0.84857985 |
| O00264 | PGRMC1  | GDQPAASGSDDDDEPPLPR                                      | S54            | 0.91298244 | 1.03222857 | 0.96718287 |
| O15173 | PGRMC2  | LLKPGEEPSEYTDDEEDTK                                      | S208           | 0.02671823 | 1.43995098 | 0.41830815 |
| O15173 | PGRMC2  | LLKPGEEPSEYTDDEEDTK                                      | T211           | 0.06162473 | 1.2715816  | 0.47702638 |
| O15173 | PGRMC2  | GLGAGAGAGEESPATSLPR                                      | S90            | 0.73174865 | 0.91438746 | 0.89605782 |
| Q8IZ21 | PHACTR4 | SSSPVQVEEPVR                                             | S118           | 0.65847268 | 0.95802161 | 0.85416521 |
| Q8IXK0 | PHC2    | LPQQDHTTTTSEMEEPYLQESK                                   | T619           | 0.87271026 | 0.9555635  | 0.95542841 |
| Q8NDX5 | PHC3    | MDRTPPPPTLSPAAITVGR                                      | T609,S616      | 0.77952052 | 1.12637886 | 0.91574407 |
| Q8WUB8 | PHF10   | GTSDDSSGNVSEGESPPDSQEDSFQGR                              | S327           | 0.01374141 | 0.5417869  | 0.41152527 |
| Q8WUB8 | PHF10   | RYSPELDR                                                 | S270           | 0.37666834 | 1.2326519  | 0.70397848 |
| O94880 | PHF14   | SNEDSLILEK                                               | S302           | 0.04776543 | 0.61226921 | 0.45625798 |
| Q92613 | PHF16   | NSSTETDQPHSPDSSSVHSIR                                    | S566           | 0.88234013 | 1.01985112 | 0.95761744 |
| Q6IE81 | PHF17   | GAAQENGAPCECSR                                           | S392           | 0.28930475 | 0.57607597 | 0.65205353 |
| O75151 | PHF2    | AVRPEVNTVASSDEVCDGDREK                                   | S458           | 0.79515226 | 0.96102992 | 0.92361025 |
| Q96BD5 | PHF21A  | YNAVLFGFALTPTSQSSHPDSENEK                                | S447,S455      | 0.15889275 | 1.44266622 | 0.55688781 |
| Q9BUL5 | PHF23   | EESDWPASGSSSLRGEAASDSDGWDAPSDDLPR                        | S64            | 0.80993143 | 1.03911498 | 0.92702022 |
| Q92576 | PHF3    | RQLQEDQENLNQDQNTSSNSPCR                                  | S1614          | 0.09303658 | 0.66893424 | 0.51597098 |
| Q92576 | PHF3    | SPQFINLK                                                 | S1642          | 0.15744598 | 0.61101816 | 0.56688781 |
| Q8IWS0 | PHF6    | TAHNSEADLEESFNEHELEPSSPK                                 | S155           | 0.1988676  | 1.75941873 | 0.58169594 |
| Q8IWS0 | PHF6    | TAHNSEADLEESFNEHELEPSSPK                                 | S154           | 0.26303606 | 1.61194424 | 0.63172678 |
| Q8IWS0 | PHF6    | TAHNSEADLEESFNEHELEPSSPK                                 | S138,S155      | 0.43860454 | 0.82084189 | 0.7336348  |
| Q8WWQ0 | PHIP    | TAFYNEDDSEEEQR                                           | S1783          | 0.12029122 | 0.80197044 | 0.5377039  |
| Q8WWQ0 | PHIP    | AQSYDIQAWK                                               | S1315          | 0.5998845  | 0.91117807 | 0.8257403  |
| Q93100 | PHKB    | SGSVYEPLK                                                | S27            | 0.20048099 | 0.68143651 | 0.58169594 |
| Q93100 | PHKB    | RQSSTPAPELGQQPDVNISEWK                                   | T702           | 0.4794848  | 1.68480404 | 0.75541886 |
| Q93100 | PHKB    | RQSSTPAPELGQQPDVNISEWK                                   | T702,S700      | 0.65740265 | 1.21625456 | 0.85340924 |

|        |         |                                    |             |            |            |             |
|--------|---------|------------------------------------|-------------|------------|------------|-------------|
| Q93100 | PHKB    | QSSTPSAPELGQQPDVNISEWK             | T702        | 0.8766095  | 0.97137803 | 0.95556965  |
| Q93100 | PHKB    | RSGSVYELPK                         | S27         | 0.99403064 | 0.99706846 | 0.99772632  |
| Q86UU1 | PHLDB1  | TRSPSPTLGESLAPHK                   | T522,S518   | 0.20294381 | 0.62119391 | 0.58387059  |
| Q86UU1 | PHLDB1  | TFSDLATR                           | S430        | 0.21798331 | 0.79272574 | 0.60411977  |
| Q865Q0 | PHLDB2  | LSTGTTVEDVQK                       | S468        | 0.21336801 | 0.71779482 | 0.59986893  |
| Q865Q0 | PHLDB2  | SHDNVYSLGGLEGR                     | S157        | 0.40020579 | 0.7467492  | 0.7160132   |
| Q865Q0 | PHLDB2  | SSISSISGR                          | S414        | 0.87966939 | 1.04941301 | 0.95721371  |
| Q9P1Y6 | PHRF1   | RPSPEPWDEEDGASCSTFFGSEER           | S936        | 0.23137414 | 1.51416665 | 0.6080317   |
| Q9P1Y6 | PHRF1   | TVTCTVVEPEAPPSPDVLQAATHR           | T981        | 0.33777082 | 2.68790964 | 0.67736506  |
| Q9P1Y6 | PHRF1   | GRECSPTSSLER                       | S1124       | 0.40210526 | 1.1652883  | 0.7160132   |
| Q9P1Y6 | PHRF1   | ECSPTSSLER                         | S1124       | 0.48174986 | 0.88480099 | 0.75656475  |
| Q9P1Y6 | PHRF1   | EASPTAPLAQGEPPGREDLPTR             | S1202       | 0.52718357 | 0.87748714 | 0.77967028  |
| Q9P1Y6 | PHRF1   | GAVAAEGASDTEREETESQGLAAR           | S915        | 0.62743383 | 1.13947151 | 0.83899389  |
| Q9P1Y6 | PHRF1   | LPALGEAHVSEVATADK                  | S1229       | 0.69158141 | 0.91071636 | 0.8713243   |
| Q9BTU6 | PI4K2A  | VAAAAGSGSPPGSPGHDRER               | S47,S51     | 0.38217301 | 1.24106016 | 0.70884547  |
| Q9BTU6 | PI4K2A  | VAAAAGSGSPPGSPGHDR                 | S47,S51     | 0.58025741 | 0.9079396  | 0.8170849   |
| Q9BTU6 | PI4K2A  | VAAAAGSGSPPGSPGHDR                 | S47         | 0.90737639 | 0.95030988 | 0.96679277  |
| Q9UBF8 | PI4KB   | SVENLPECGITHEQR                    | S428        | 0.00585967 | 0.74907407 | 0.31900981  |
| O75928 | PIAS2   | CIFMSETQSSPTK                      | S499        | 0.05039976 | 0.62958047 | 0.45652016  |
| Q13492 | PICALM  | ITAAQHSVTGSAVSK                    | S16         | 0.4534705  | 1.93628874 | 0.73771138  |
| O00443 | PIK3C2A | SQSLNIR                            | S338        | 0.18768761 | 1.13386728 | 0.57474321  |
| O00443 | PIK3C2A | GFELSSSTR                          | S58         | 0.24681842 | 1.33126677 | 0.61377267  |
| O00443 | PIK3C2A | VSNLQVSPK                          | S259        | 0.49860956 | 0.91026566 | 0.76446134  |
| Q9Y2I7 | PIKFYVE | SASITNLSLDR                        | S307        | 0.53033032 | 0.82876029 | 0.78301333  |
| Q13563 | PKD2    | SLDDSEEDDDEDSGHSSR                 | S812        | 0.99939772 | 1.00016803 | 0.99997843  |
| P14618 | PKM     | LDIDSPPIAR                         | S37         | 0.50645433 | 1.06306306 | 0.76766855  |
| Q16512 | PKN1    | LNLGTDSDSSPQK                      | S562        | 0.07317499 | 0.61934172 | 0.49843227  |
| Q16513 | PKN2    | ASSLGEIDSELR                       | S582        | 0.31540366 | 0.88131148 | 0.640810833 |
| Q99959 | PKP2    | RLEISPDSSPER                       | S151,S155   | 0.73255381 | 1.0679595  | 0.89605782  |
| Q9Y446 | PKP3    | ADYDTLSLR                          | S180        | 0.00580232 | 1.58995457 | 0.31900981  |
| Q9Y446 | PKP3    | TADHHQLR                           | T666        | 0.28131654 | 0.86783569 | 0.6455595   |
| Q9Y446 | PKP3    | AGGLDWPEATEVSPSR                   | S238        | 0.57206135 | 0.89303318 | 0.81432655  |
| Q9Y446 | PKP3    | LSSGFDDIDLPSAVK                    | S314        | 0.57703173 | 1.23738302 | 0.81432655  |
| Q99569 | PKP4    | TGSVIGINLQR                        | S447        | 0.03185969 | 0.67493736 | 0.43874459  |
| Q99569 | PKP4    | VGSPLTLTDAQTR                      | S314        | 0.56804738 | 0.86845144 | 0.81210261  |
| Q99569 | PKP4    | AASPYQRASPTAIR                     | Y275,S281   | 0.58829305 | 0.93236376 | 0.82160635  |
| Q99569 | PKP4    | SAVSPDLHITPIYEGR                   | S406        | 0.93023627 | 1.02144437 | 0.97583851  |
| P47712 | PLA2G4A | HIVSNDSSDDESHEPK                   | S437        | 0.00994493 | 0.64196401 | 0.37254089  |
| P47712 | PLA2G4A | CSVSLNVEAR                         | S729        | 0.02276009 | 0.5723279  | 0.41830815  |
| P47712 | PLA2G4A | CSVSLNVEAR                         | S727        | 0.17964135 | 0.60529748 | 0.56916727  |
| Q15147 | PLCB4   | ANVTPQSSSELRPTTAAALASGVCAK         | T886,S889   | 0.99482932 | 0.9991343  | 0.99772632  |
| Q4KWH8 | PLCH1   | TAALESNLPGPSNTR                    | S1307       | 0.04377538 | 0.67820465 | 0.45441331  |
| Q15149 | PLEC    | GYSPYSVSGSSTAGSR                   | S4626       | 0.07872087 | 1.15430662 | 0.50397847  |
| Q15149 | PLEC    | SSSVGSSSSYPISPAVSR                 | S4384,S4400 | 0.11449927 | 0.58606557 | 0.53343618  |
| Q15149 | PLEC    | SLQEEHVAVAQLR                      | S1732       | 0.13558541 | 3.65634984 | 0.5475768   |
| Q15149 | PLEC    | SDEGQLSPATR                        | S720        | 0.14596098 | 1.21186834 | 0.55352644  |
| Q15149 | PLEC    | SSSVGSSSSYPISPAVSR                 | S4386,S4389 | 0.21711176 | 0.66131907 | 0.60411977  |
| Q15149 | PLEC    | ELEEVSPEPVPVATTQR                  | S149        | 0.22377089 | 0.78651443 | 0.6080317   |
| Q15149 | PLEC    | SSSVGSSSSYPISPAVSR                 | S4386       | 0.34305888 | 1.19642626 | 0.67878924  |
| Q15149 | PLEC    | GYSPYSVSGSSTAGSR                   | T4623,S4622 | 0.50719289 | 0.78011659 | 0.76766855  |
| Q15149 | PLEC    | QITMEELVR                          | T4030       | 0.52922948 | 1.50913431 | 0.78192464  |
| Q15149 | PLEC    | SSSVGSSSSYPISPAVSR                 | S4396       | 0.85116029 | 1.07557762 | 0.94652762  |
| Q9HB20 | PLEKHA3 | TYSDDTDCSDIPLEDPRPVHCSK            | S244        | 0.40827203 | 1.46624143 | 0.71694309  |
| Q9HAU0 | PLEKHA5 | SPTPESTIASYVTLR                    | S855        | 0.4569539  | 1.74689548 | 0.74093656  |
| Q9Y2H5 | PLEKHA6 | SPTDDEVTPSAVVR                     | S777        | 0.18851263 | 0.81828485 | 0.57474321  |
| Q9Y2H5 | PLEKHA6 | TKSPTDDEVTPSAVVR                   | T775        | 0.54728718 | 1.13170132 | 0.7933521   |
| Q9Y2H5 | PLEKHA6 | TKSPTDDEVTPSAVVR                   | T779        | 0.89801707 | 0.98127624 | 0.96293924  |
| Q9H7P9 | PLEKHG2 | LESSLDLPHSPPPSSR                   | T1257,S1261 | 0.40740698 | 0.83044808 | 0.71690855  |
| A1L390 | PLEKHG3 | IWEGMESSGGSPGK                     | S827        | 0.00166268 | 0.534067   | 0.27314524  |
| A1L390 | PLEKHG3 | GPLSPFNSR                          | S76         | 0.15604327 | 0.71260293 | 0.55688781  |
| A1L390 | PLEKHG3 | DGKSPVTPCLQEEAGEPLGGK              | S962        | 0.29041947 | 0.49026332 | 0.62505353  |
| A1L390 | PLEKHG3 | AWSSQDEVSTNVR                      | S433        | 0.80170815 | 0.91430701 | 0.92455018  |
| A1L390 | PLEKHG3 | SSSVLSLEGSEK                       | S643        | 0.8069568  | 0.93837675 | 0.92607772  |
| O60664 | PLIN3   | VSGAQEMVSSAK                       | S130        | 0.07435513 | 1.53781816 | 0.49918003  |
| Q68D20 | PMS2CL  | APETDDSFSDVCHSNQEDTGCK             | S161        | 0.04445247 | 0.80308735 | 0.45441331  |
| Q8TF01 | PNISR   | SKFSDDEEEDTENVEAASSGK              | S290        | 0.13115005 | 0.83056625 | 0.54353881  |
| Q96T60 | PNKP    | TPESQDPTPPGTLVSQLDEK               | T118        | 0.79592661 | 1.04765818 | 0.92373279  |
| Q9H307 | PNN     | ENVSALDMEK                         | S450        | 0.00804835 | 0.64314293 | 0.35749468  |
| Q9H307 | PNN     | ESRQESDPEDDDVK                     | S100        | 0.09485964 | 2.52077014 | 0.51670111  |
| Q9H307 | PNN     | GFSDSGGPPAK                        | S66         | 0.10188774 | 0.74537333 | 0.52414255  |
| Q9H307 | PNN     | EIAIVHSDAPEK                       | S347        | 0.73330966 | 1.04756171 | 0.89605782  |
| Q15054 | POLD3   | RVALSDDETK                         | S307        | 0.51812006 | 1.50173611 | 0.77582848  |
| O95602 | POLR1A  | QEEVEVYSEEEEEEREENDDMDEEER         | S1429       | 0.71942147 | 0.86447786 | 0.88953552  |
| P24928 | POLR2A  | YSPTSPTYSPSPK                      | T1919,Y1909 | 0.20016273 | 0.78333333 | 0.58169594  |
| P24928 | POLR2A  | YSPTSPTYSPSPK                      | S1920       | 0.60046036 | 1.05104455 | 0.8258728   |
| P24928 | POLR2A  | YSPTSPTYSPSPK                      | Y1909,S1913 | 0.63486059 | 0.90493058 | 0.8428508   |
| P24928 | POLR2A  | YSPTSPTYSPSPK                      | S1913       | 0.9703605  | 0.99163336 | 0.98915891  |
| P24928 | POLR2A  | YSPTSPTYSPTPK                      | S1878       | 0.9732865  | 0.99620253 | 0.98966465  |
| Q9NVU0 | POLR3E  | IKEEPVSEEGEEDDEEQAEEEEPMDTSPSGLHSK | S503        | 0.64676759 | 1.26409752 | 0.84855908  |
| Q9NVU0 | POLR3E  | EPEVSEEGEEDDEEQAEEEEPMDTSPSGLHSK   | S503        | 0.83185477 | 1.06304201 | 0.93808376  |
| Q99575 | POP1    | VQAYEEPSVASSPNKG                   | S730        | 0.21280152 | 0.81818182 | 0.59974503  |

|        |          |                                     |             |            |            |            |
|--------|----------|-------------------------------------|-------------|------------|------------|------------|
| Q969H6 | POP5     | SCLLEEEEEEGEEAAEAME                 | S154        | 0.47526363 | 1.35787745 | 0.75249201 |
| P16435 | POR      | IQLTSSVR                            | S63         | 0.01471903 | 6.20056421 | 0.41362115 |
| P14859 | POU2F1   | INPPSSGGTSSSPIK                     | S448        | 0.1535927  | 0.6778043  | 0.55688781 |
| Q9H2U2 | PPA2     | SLVESVSSPNK                         | S317        | 0.65656209 | 1.08369748 | 0.85263945 |
| Q9NQ55 | PPAN     | VGGSDDEEASGIPSR                     | S359        | 0.33012597 | 0.89087657 | 0.67434984 |
| Q13136 | PPFIA1   | RSSDGLSHEEDLAK                      | S239        | 0.33397953 | 1.17183771 | 0.67622969 |
| Q13136 | PPFIA1   | RSSDGLSHEEDLAK                      | S239,S242   | 0.35930134 | 0.77273192 | 0.69128283 |
| Q86W92 | PPFIBP1  | SQSTTFNPDMMSEPEFK                   | S601        | 0.09536151 | 0.64380081 | 0.51670111 |
| Q86W92 | PPFIBP1  | SPSASITDEDSNV                       | S1001       | 0.4185538  | 0.84880383 | 0.72427252 |
| Q8ND30 | PPFIBP2  | LSCSLEDLRSEVDK                      | S385        | 0.15217512 | 1.71691588 | 0.55688781 |
| Q8ND30 | PPFIBP2  | LSCSLEDLRSEVDK                      | S387        | 0.23260557 | 1.24501865 | 0.6080317  |
| Q8ND30 | PPFIBP2  | LSCSLEDLR                           | S387        | 0.53661247 | 0.81965993 | 0.78705986 |
| Q08752 | PPID     | DGSGDSDHPDPEDADIDLK                 | S198        | 0.13552775 | 1.25230415 | 0.5475768  |
| O43314 | PPIP5K2  | SGEQITSSPVSPK                       | S1006       | 0.0429612  | 1.44634342 | 0.45441331 |
| O15355 | PPM1G    | ELAQIAGRPTDEDEK                     | T122        | 0.82961804 | 1.02860541 | 0.93678837 |
| O15355 | PPM1G    | KLEEVLTSTEGAEENGNSDK                | T528        | 0.88952719 | 1.03246897 | 0.95975302 |
| O15355 | PPM1G    | LEEVLTSTEGAEENGNSDK                 | S527        | 0.89093159 | 1.02507797 | 0.95998402 |
| Q9ULR3 | PPM1H    | RSSLNPNGLQLK                        | S124        | 0.88277776 | 1.04965099 | 0.95761744 |
| Q96QC0 | PPP1R10  | LIPLDECSMDETPYVETLEPGGSGGSPDGAGGSK  | S542        | 0.89222328 | 1.01886435 | 0.96024802 |
| O14974 | PPP1R12A | TGSYGALAEITASK                      | S445        | 0.02514454 | 1.33476253 | 0.41830815 |
| O14974 | PPP1R12A | RSTQGVLTLDLQEAKE                    | T696        | 0.05120866 | 0.34318428 | 0.45652016 |
| O14974 | PPP1R12A | SGSYSYLEER                          | S910        | 0.14067868 | 1.12351029 | 0.54797298 |
| O14974 | PPP1R12A | KSPLIESTANMDDNNQSQK                 | S299        | 0.3079274  | 1.14708112 | 0.66139614 |
| O14974 | PPP1R12A | STGVFSWTDQSDENEQEQQSDTEEGSNKK       | S871        | 0.31427615 | 1.4858797  | 0.66321511 |
| O14974 | PPP1R12A | STGVFSWTDQSDENEQEQQSDTEEGSNK        | S871        | 0.33053927 | 1.24268019 | 0.64749386 |
| O14974 | PPP1R12A | LASTSDIEEK                          | S507        | 0.39277617 | 0.7266034  | 0.7130844  |
| O14974 | PPP1R12A | RLASTSDIEEK                         | S507        | 0.58452913 | 0.84417344 | 0.82000746 |
| O14974 | PPP1R12A | SPLIESTANMDDNNQSQK                  | S299        | 0.87688086 | 0.97145693 | 0.95556965 |
| O60237 | PPP1R12B | EKPTDTEGLEGSPEK                     | S687        | 0.31375186 | 1.15880689 | 0.66321511 |
| Q9BZL4 | PPP1R12C | TGSSGALGPPER                        | S427        | 0.03226767 | 1.59549824 | 0.43874459 |
| Q9BZL4 | PPP1R12C | SASSSWLEGTSTQAK                     | S450        | 0.10254789 | 1.41582063 | 0.52414255 |
| Q9BZL4 | PPP1R12C | SPVQLEEAFFSR                        | S407        | 0.44067709 | 0.86317882 | 0.73567227 |
| Q96A00 | PPP1R14A | QPSPSHDGSLSPQLDR                    | S128,S134   | 0.28001716 | 0.78830574 | 0.6455595  |
| Q96A00 | PPP1R14A | QPSPSHDGSLSPQLDR                    | S128,S136   | 0.31013476 | 0.76827196 | 0.66177455 |
| Q96A00 | PPP1R14A | QPSPSHDGSLSPQLDR                    | S128        | 0.90178292 | 0.98373984 | 0.96458226 |
| P41236 | PPP1R2   | IQEQESSGEEDSLSPEER                  | S122        | 0.04809589 | 1.41569968 | 0.45625798 |
| P41236 | PPP1R2   | IDEPSTPYHSMGDDDEDACSDTEATEAMAPDILAR | T89         | 0.32282796 | 2.64954294 | 0.6705262  |
| Q965B3 | PPP1R9B  | FNGSTALDK                           | S190        | 0.09468755 | 0.63109902 | 0.51670111 |
| Q965B3 | PPP1R9B  | ASSLNENVDSALLK                      | S100        | 0.24073151 | 0.68960387 | 0.61232743 |
| Q9NY27 | PPP4R2   | DLHSEGSSENEGPVSSSSDCR               | S361        | 0.11647883 | 0.7829331  | 0.53343618 |
| Q9NY27 | PPP4R2   | NHSDSSTSESEVSSVPLK                  | S226        | 0.11925071 | 0.40626884 | 0.53759949 |
| Q5H9R7 | PPP6R3   | FADQDDIGNVSFDR                      | S579        | 0.16257814 | 0.82915175 | 0.55797736 |
| Q5H9R7 | PPP6R3   | IQQFDDGGDEEDIWEEK                   | S617        | 0.92214593 | 0.98576513 | 0.97154665 |
| Q92733 | PRCC     | QITQEEDSDDEEVAPENFFSLPEK            | T261        | 0.45994726 | 1.47845157 | 0.74160036 |
| Q9NQV6 | PRDM10   | SDDGTQLDLHPFTK                      | S424        | 0.17846291 | 0.73498937 | 0.56898248 |
| Q9Y478 | PRKAB1   | CSDVSELSSPPGYPHQEPYVCKPEER          | S182        | 0.12771518 | 1.43936731 | 0.5403576  |
| P10644 | PRKAR1A  | TDSREDEISPPPNPVVK                   | S83         | 0.41653794 | 1.09919436 | 0.72415783 |
| P31321 | PRKAR1B  | SNSQSDSHDEEVSPTPPNPVVK              | S83         | 0.23361558 | 1.24394966 | 0.6080317  |
| P13861 | PRKAR2A  | RVSVCAETYNPDEEEDTDPR                | S99         | 0.80952932 | 1.03964422 | 0.92686801 |
| P31323 | PRKAR2B  | RASVCAEAYNPDEEEDDAESR               | S114        | 0.33796654 | 0.68444761 | 0.67736506 |
| Q05655 | PRKCD    | RSDSASSEPVGIYQGFKE                  | S304        | 0.00200625 | 0.57831945 | 0.27314524 |
| Q05655 | PRKCD    | SDSASSEPVGIYQGFKE                   | S304        | 0.02664444 | 0.43396836 | 0.41830815 |
| Q05655 | PRKCD    | RSDSASSEPVGIYQGFKE                  | S302        | 0.04834139 | 0.61772382 | 0.45625798 |
| Q15139 | PRKD1    | SPSESFIGR                           | S237        | 0.06345329 | 1.38116371 | 0.47702638 |
| Q15139 | PRKD1    | TSSAELTSAAPDEPLLQK                  | S219        | 0.6017016  | 0.93978275 | 0.59819151 |
| P78527 | PRKDC    | LTPLPEDNSMNVDDQDPSDR                | S3205       | 0.32692152 | 1.09869102 | 0.67305029 |
| O75569 | PRKRA    | AEAPPLEREDSGTFSLKG                  | S18         | 0.10562639 | 1.14603798 | 0.52598269 |
| O75569 | PRKRA    | EDSGTFSLKG                          | S18         | 0.85384987 | 0.94699323 | 0.94798805 |
| O43422 | PRKRIR   | ETNNSNAQNPSEEEGEGQDELDILPLLEEK      | S141        | 0.93253221 | 1.01155268 | 0.97583851 |
| Q86WR7 | PROSER2  | APSPPEVHPR                          | S179        | 0.05420918 | 1.34382567 | 0.47264914 |
| Q86WR7 | PROSER2  | SFTLDDDESLK                         | S43         | 0.31547074 | 0.72430213 | 0.66410833 |
| Q86WR7 | PROSER2  | SRSFTLDDDESLK                       | S43         | 0.45246623 | 1.16715759 | 0.73811209 |
| Q86WR7 | PROSER2  | SDASDMNSDTPSPCR                     | S18         | 0.64793708 | 0.93312827 | 0.84944625 |
| Q86WR7 | PROSER2  | SRSFTLDDDESLK                       | S41         | 0.90822709 | 1.01610232 | 0.9669039  |
| O43395 | PRPF3    | GDDDEESDEEAVK                       | S619        | 0.73660962 | 1.02724458 | 0.89801187 |
| O43395 | PRPF3    | GDDDEESDEEAVK                       | S619        | 0.86034266 | 1.0610105  | 0.95107454 |
| O75400 | PRPF40A  | SDSPESAEREK                         | S888        | 0.00043913 | 0.71861588 | 0.2160495  |
| O75400 | PRPF40A  | QETVADFPTK                          | T373        | 0.27309716 | 0.86464092 | 0.63888342 |
| Q13523 | PRPF4B   | SPIINESR                            | S277        | 0.08205415 | 0.84956076 | 0.50397847 |
| Q13523 | PRPF4B   | EQPEMEDANSEK                        | S20         | 0.30942412 | 0.79804913 | 0.66139614 |
| Q13523 | PRPF4B   | DASPINRWSPTR                        | S431,S437   | 0.40884908 | 0.85701906 | 0.71694309 |
| Q13523 | PRPF4B   | LCDFGSASHVADNDITPYLVSR              | Y849        | 0.52521272 | 1.51083579 | 0.77832728 |
| Q13523 | PRPF4B   | SRSPLINDR                           | S366,S368   | 0.6168567  | 0.92063492 | 0.83347439 |
| Q13523 | PRPF4B   | SINEENGEVSEDQSQNK                   | S23,S32     | 0.79332808 | 1.03961051 | 0.9228136  |
| Q13523 | PRPF4B   | SINEENGEVSEDQSQNK                   | S23         | 0.83891792 | 0.94837635 | 0.94203891 |
| Q13523 | PRPF4B   | SINEENGEVSEDQSQNK                   | S32         | 0.89736599 | 1.02391825 | 0.96293924 |
| Q96HE9 | PRR11    | SPTPTLPLTSSFDQEQN                   | S355        | 0.63667638 | 0.79550591 | 0.8428508  |
| Q9ULL5 | PRR12    | KQETAAVCGETDEEAGSGGEGIFR            | T740,S747   | 0.07941241 | 0.72116094 | 0.50397847 |
| Q9ULL5 | PRR12    | TSSFHLLR                            | S256        | 0.97798549 | 1.01091213 | 0.99151664 |
| P48634 | PRRC2A   | WGPRPGSSR                           | S932        | 0.11694086 | 1.45143863 | 0.53343618 |
| P48634 | PRRC2A   | TASERTSEGEYEEIPIK                   | T1083,S1089 | 0.24563121 | 0.87187786 | 0.61377267 |

|        |           |                                                    |           |            |            |            |
|--------|-----------|----------------------------------------------------|-----------|------------|------------|------------|
| P48634 | PRRC2A    | GNSPNSPEPTPK                                       | S380      | 0.44157685 | 1.19907223 | 0.73610391 |
| P48634 | PRRC2A    | ERSDSGGSSSEPFDR                                    | S761      | 0.96514024 | 1.00332428 | 0.98750534 |
| Q5JSZ5 | PRRC2B    | CSPLPEDFVDEK                                       | S853      | 0.00437449 | 0.75163848 | 0.31386966 |
| Q9Y520 | PRRC2C    | STTPTSSPFR                                         | T2682     | 0.10184549 | 0.75883154 | 0.52414255 |
| Q9Y520 | PRRC2C    | SVEDVRPHHTDANNQSACFEAPDQK                          | T887      | 0.20464173 | 0.74875042 | 0.58662445 |
| Q9Y520 | PRRC2C    | SVEDVRPHHTDANNQSACFEAPDQK                          | S878      | 0.42396702 | 0.87159805 | 0.72757489 |
| Q9Y520 | PRRC2C    | LPDLSPVENK                                         | S2105     | 0.67387059 | 1.03934987 | 0.86131187 |
| P49768 | PSEN1     | AAVQELSSILAGEDPEER                                 | S367      | 0.07560362 | 0.4777686  | 0.50397847 |
| O75475 | PSIP1     | KPSSEEREFEISLK                                     | S514      | 0.0297377  | 1.5104091  | 0.43032203 |
| O75475 | PSIP1     | QSNASSDVEVEEK                                      | S106      | 0.60784735 | 1.06067292 | 0.82983763 |
| Q99460 | PSMD1     | TSSAFVGTPEASPEPK                                   | T311,S315 | 0.63089206 | 1.09750004 | 0.8405143  |
| O00231 | PSMD11    | AQSLSTDR                                           | S14       | 0.26810802 | 0.725848   | 0.63502787 |
| Q95456 | PSMG1     | AGTEDEEEEEGR                                       | T18       | 0.65247019 | 1.08609417 | 0.85053268 |
| P48651 | PTDSS1    | TYSECEDGTYSPESISWHHR                               | S417      | 0.62897179 | 0.831553   | 0.83899389 |
| Q9BVG9 | PTDSS2    | DAGGPRPESPVPAGR                                    | S16       | 0.69719411 | 1.0347032  | 0.87447728 |
| Q9BVG9 | PTDSS2    | RDAGGPRPESPVPAGR                                   | S16       | 0.85791014 | 1.04403149 | 0.95032314 |
| Q15185 | PTGES3    | DWEDDSDDEMSNFDR                                    | S113      | 0.60764867 | 1.26348419 | 0.82983763 |
| Q05397 | PTK2      | LQPQEISPPPTANLDR                                   | S910      | 0.71326632 | 1.19732553 | 0.88522134 |
| Q9P035 | PTPLAD1   | WLDESDAEMELR                                       | S114      | 0.41425129 | 0.82557522 | 0.7227363  |
| P18031 | PTPN1     | GSPLNAAPYGIEMSQDTEVR                               | S352      | 0.29090388 | 1.31221619 | 0.65205353 |
| Q05209 | PTPN12    | NLSFEIK                                            | S435      | 0.07082471 | 1.45276728 | 0.49571338 |
| Q05209 | PTPN12    | SFDGNTLLNR                                         | S449      | 0.10224702 | 2.102294   | 0.52414255 |
| Q05209 | PTPN12    | TVSLTSPPTQVETPDLDVHDNTSPLFR                        | S588,T565 | 0.14330957 | 1.78925075 | 0.55269669 |
| Q05209 | PTPN12    | DVDVSDSPPLPER                                      | S673      | 0.186754   | 1.22797555 | 0.57474321 |
| Q05209 | PTPN12    | TVSLTSPPTQVETPDLDVHDNTSPLFR                        | S588      | 0.34156302 | 2.64500875 | 0.67842858 |
| Q15678 | PTPN14    | YVSGSSPDLVTR                                       | S594      | 0.03496185 | 0.65724198 | 0.43874459 |
| Q15678 | PTPN14    | ICTEQNSPPPIR                                       | S312      | 0.12020776 | 0.7048698  | 0.5377039  |
| P17706 | PTPN2     | EDLSPAFDHPNK                                       | S304      | 0.0084351  | 0.51489155 | 0.35749468 |
| Q16825 | PTPN21    | TLSASAAEVAPR                                       | S658      | 0.29684124 | 0.7282685  | 0.65749804 |
| Q9H357 | PTPN23    | GAAAADLLSSPESQHGQTSPGGGQLLQPTK                     | S1123     | 0.7766726  | 1.20280472 | 0.91412088 |
| P26045 | PTPN3     | SLSVHEHLEK                                         | S359      | 0.51393519 | 1.21611326 | 0.77359824 |
| P26045 | PTPN3     | GSLAPQDSDSEVSQNR                                   | S425      | 0.77024766 | 0.9556202  | 0.91329931 |
| P10586 | PTPRF     | TATVMMTR                                           | T1445     | 0.29849046 | 0.77985019 | 0.65817287 |
| Q6NZI2 | PTRF      | SFTPDHVVYAR                                        | S300      | 0.7857346  | 0.92073602 | 0.92039443 |
| Q14671 | PUM1      | RDSLTSGSDLYK                                       | S709      | 0.61252514 | 0.92960922 | 0.83216433 |
| Q8TB72 | PUM2      | QASPTVEVER                                         | S182      | 0.76453484 | 0.96345748 | 0.91122881 |
| Q8TB72 | PUM2      | GKASPFEEQNR                                        | S136      | 0.81259321 | 0.91994809 | 0.92840735 |
| Q8TB72 | PUM2      | ASPFEEQNR                                          | S136      | 0.92672899 | 1.011956   | 0.97306544 |
| Q96QR8 | PURB      | RGGGSGGEESEGEVDED                                  | S304      | 0.70462206 | 0.97281666 | 0.87860911 |
| Q9Y606 | PUS1      | VPSPLEGSEGGDGD                                     | T426      | 0.64851745 | 1.18997719 | 0.84956032 |
| Q13610 | PWP1      | LQEEGGGDEEETGSPSEDGMQ SAR                          | S50       | 0.0179652  | 0.58549128 | 0.41830815 |
| Q13610 | PWP1      | EPLEDGDPEDDRTLDDDELAEYDLDK                         | T86       | 0.47081732 | 1.096037   | 0.74973768 |
| Q96N64 | PWWP2A    | SPEAVGELEAEK                                       | S81       | 0.49716926 | 0.95522388 | 0.76446134 |
| P49023 | PXN       | TSSVSNPQDSVSGSCSR                                  | S106      | 0.1315259  | 0.69915701 | 0.5444061  |
| P49023 | PXN       | SSPGGQDEGGFMAQ GK                                  | S303      | 0.23013729 | 0.86329007 | 0.6080317  |
| P49023 | PXN       | DGGRSSPGGQDEGGFMAQ GK                              | S302      | 0.33206169 | 1.30809135 | 0.67622969 |
| P49023 | PXN       | FIHQQQSSSPVYGSSAK                                  | S85       | 0.57704673 | 1.22131148 | 0.81432655 |
| Q9BRQ0 | PYGO2     | GGGTPDANSLAPP GK                                   | T302      | 0.89249533 | 0.98328417 | 0.96224802 |
| Q6ZRP7 | QSOX2     | DNLLDTYSADQGSSEGGTLAR                              | S578      | 0.00561294 | 0.35058923 | 0.31900981 |
| Q15032 | R3HDM1    | SIEEREEYQR                                         | S282      | 0.12641702 | 1.27260273 | 0.5403576  |
| Q15032 | R3HDM1    | AASDTL GAGETVWGK                                   | S973      | 0.51349785 | 1.19761987 | 0.77359824 |
| Q9Y2K5 | R3HDM2    | SASTDLGTADVV LGR                                   | T856      | 0.86272675 | 1.07266528 | 0.95161386 |
| P61026 | RAB10     | EPNSENVDISGGVGTGWK                                 | S187      | 0.30193453 | 0.79321275 | 0.65897499 |
| Q6WKZ4 | RAB11FIP1 | LEVSPAQPTAR                                        | S545      | 0.07223698 | 0.80386394 | 0.49657518 |
| Q6WKZ4 | RAB11FIP1 | DSGSDTASAIIPSTTPSVSDDES VVK                        | S202      | 0.9423481  | 0.98203463 | 0.97990545 |
| Q6IQ22 | RAB12     | AGGGGGLGAGSPALSGGQGR                               | S21       | 0.71202223 | 0.84708037 | 0.88466484 |
| Q15042 | RAB3GAP1  | KTSASDVNTIYPGDAGK                                  | S537      | 0.550193   | 0.84392312 | 0.79582726 |
| Q15042 | RAB3GAP1  | KTSASDVNTIYPGDAGK                                  | T542      | 0.81505586 | 0.92228111 | 0.92952506 |
| P61006 | RAB8A     | LEGNPQSGSNQGVK                                     | S185      | 0.17703365 | 0.77627435 | 0.56898248 |
| Q15276 | RABEP1    | AQSTDSLGTSGSLQSK                                   | S407      | 0.12166003 | 1.46077821 | 0.53786538 |
| Q3YEC7 | RABL6     | GPAPAPQCCSEFPETK                                   | S492      | 0.103563   | 0.746236   | 0.52476522 |
| Q3YEC7 | RABL6     | ADDFPVRDDPSVDTDEDEGAEP PPPPK                       | T599,S596 | 0.32602115 | 1.78530762 | 0.67274825 |
| Q3YEC7 | RABL6     | NDSDLFGLGLEEAGPKESSEEGK                            | S640      | 0.67499441 | 1.07815216 | 0.86131187 |
| Q9NS91 | RAD18     | NDLQDTEISPR                                        | S471      | 0.02957025 | 0.6988723  | 0.43032203 |
| P54725 | RAD23A    | EDKSPSEESAPTTSPESVSGVSPSSGSSGR                     | S123      | 0.24660496 | 1.13158767 | 0.61377267 |
| Q9Y620 | RAD54B    | SAAPSQLGNSFK                                       | S14       | 0.01091153 | 0.40990874 | 0.37969115 |
| Q99638 | RAD9A     | SPQGPSVLAE DSEGEK                                  | S387      | 0.77704868 | 0.93717774 | 0.91412088 |
| P04049 | RAF1      | AAHTEDINACTLTTSPR                                  | S642      | 0.23572928 | 0.63135677 | 0.6080317  |
| Q7Z5J4 | RAI1      | EERPEGSPTLFK                                       | S1266     | 0.45599466 | 0.88198089 | 0.7402091  |
| Q7Z5J4 | RAI1      | SQHCSPEGSGVSAEPAGTPLSEPPSPQSTHAEPQ EADYLSGSEDP LER | S521      | 0.83542385 | 1.04164671 | 0.9396472  |
| Q9P0K7 | RAI14     | SITSTPLSGK                                         | S309      | 0.90212916 | 1.03242046 | 0.96458226 |
| Q15311 | RALBP1    | TPSSEIEISPTK                                       | S29       | 0.62358904 | 1.08284727 | 0.83761336 |
| Q15311 | RALBP1    | IAQEIASLSK                                         | S463      | 0.66169846 | 0.91062503 | 0.85592923 |
| Q15311 | RALBP1    | TGEPSPPHDILHEPPDVSDDEK                             | S48,S62   | 0.90770859 | 0.97849462 | 0.96679277 |
| Q6GYQ0 | RALGAPA1  | HFSQSEETGNEVFGALNEEQPLPR                           | T778      | 0.26843268 | 2.04743737 | 0.63052787 |
| Q6GYQ0 | RALGAPA1  | SSSTDILEPFTVER                                     | S797      | 0.44676256 | 0.9017211  | 0.73811209 |
| Q6GYQ0 | RALGAPA1  | TVDIDDAQILPR                                       | T754      | 0.53340303 | 0.88037243 | 0.78590527 |
| Q6GYQ0 | RALGAPA1  | RGSSPSLEIPK                                        | S860      | 0.72317647 | 1.03634085 | 0.89157396 |
| Q9UKM9 | RALY      | TRDDGDEEGLLTHSEEELEHSQD TDADDGALQ                  | S288      | 0.40813386 | 1.20268114 | 0.71694309 |
| Q9UKM9 | RALY      | TRDDGDEEGLLTHSEEELEHSQD TDADDGALQ                  | T286,S295 | 0.46616146 | 1.39963394 | 0.7470731  |
| Q9UKM9 | RALY      | DDGDEEGLLTHSEEELEHSQD TDADDGALQ                    | S288      | 0.5818724  | 1.05381545 | 0.81832936 |



|        |         |                                     |             |            |            |            |
|--------|---------|-------------------------------------|-------------|------------|------------|------------|
| Q9UKM9 | RALY    | GRLSPVPVPR                          | S135        | 0.81445179 | 1.14360157 | 0.92952506 |
| P62826 | RAN     | SIVFHR                              | S135        | 0.68724767 | 0.95405208 | 0.86921814 |
| P43487 | RANBP1  | DTHEDHDTSTENTDESNDHPQFEPVIVSLPEQEIK | T13         | 0.1327178  | 0.72285419 | 0.5474013  |
| P43487 | RANBP1  | DTHEDHDTSTENTDESNDHPQFEPVIVSLPEQEIK | T18         | 0.24538402 | 0.74123346 | 0.61377267 |
| Q6VN20 | RANBP10 | SQDSYPGSPSLSPR                      | S369        | 0.28376621 | 0.81216313 | 0.64850087 |
| P49792 | RANBP2  | SGSSFVHQASFK                        | S1456       | 0.05887341 | 2.0829456  | 0.47702638 |
| P49792 | RANBP2  | DSLITPHVSR                          | S2454       | 0.10437403 | 0.74276402 | 0.52476522 |
| P49792 | RANBP2  | TESSDDIHFEPPVQMPEK                  | S2008       | 0.20222855 | 0.7345434  | 0.58282436 |
| P49792 | RANBP2  | AVVSPPK                             | S2510       | 0.26358297 | 0.69055854 | 0.6321586  |
| P49792 | RANBP2  | LPPTFFCGVCSDDTDEDNGNGEDFQSELOK      | S2741       | 0.42072413 | 1.46151649 | 0.72484937 |
| P49792 | RANBP2  | NHETDGGSAHGDDDDGPHFEPVPLPK          | S1160       | 0.48624741 | 0.93928981 | 0.75953527 |
| P49792 | RANBP2  | YLSLSPK                             | S788        | 0.59805852 | 0.91309824 | 0.82454506 |
| P49792 | RANBP2  | EDALDDSVSSSVHASPLASSPVRK            | S2251       | 0.67967269 | 0.81955738 | 0.86312417 |
| P49792 | RANBP2  | EDALDDSVSSSVHASPLASSPVRK            | S2246,S2250 | 0.89821575 | 1.04177099 | 0.96293924 |
| P49792 | RANBP2  | NHETDGGSAHGDDDDGPHFEPVPLPK          | T1156       | 0.92175823 | 1.01217949 | 0.97154665 |
| P49792 | RANBP2  | ELVGPLAETVFTPKTSPENVQDR             | T1396,T1399 | 0.94871238 | 0.97884679 | 0.98215506 |
| Q9H6Z4 | RANBP3  | SAGGSSPEGGEDSDREDGNYCPPVK           | S108        | 0.2598045  | 0.80823293 | 0.62708943 |
| Q9H6Z4 | RANBP3  | ENAAAESGSESSQEATPEK                 | S355        | 0.40840017 | 0.88609218 | 0.71694309 |
| Q9H6Z4 | RANBP3  | ENAAAESGSESSQEATPEK                 | S353        | 0.49371223 | 1.04361053 | 0.76351366 |
| Q9H6Z4 | RANBP3  | SPSEAADEVCALEEK                     | S219        | 0.58878415 | 0.83042674 | 0.8162585  |
| P47736 | RAP1GAP | SSAIGIENIQEVQEK                     | S498        | 0.42322149 | 0.80305294 | 0.72757489 |
| P47736 | RAP1GAP | SQSDMAMGLSNK                        | S441        | 0.76621662 | 0.95076686 | 0.91215003 |
| P47736 | RAP1GAP | RSSAIGIENIQEVQEK                    | S499        | 0.95652429 | 0.98414496 | 0.98388755 |
| Q8TEU7 | RAPGEF6 | LPEGPVDSDEDEEEDRIDTDLQGR            | S230        | 0.44476106 | 1.21580747 | 0.73811209 |
| P06400 | RB1     | TAVIPINGSR                          | S249        | 0.09517298 | 0.59218469 | 0.51670111 |
| P06400 | RB1     | FPSSPLR                             | S795        | 0.13851924 | 0.58410661 | 0.54797298 |
| P06400 | RB1     | TLQTDSDSFTQRTPR                     | S350        | 0.16576608 | 0.52708245 | 0.56312413 |
| Q09028 | RBBP4   | TPSSDVLVFDYTK                       | S146        | 0.12839127 | 0.69131577 | 0.61122341 |
| Q7Z6E9 | RBBP6   | DDFESEEDVK                          | S1328       | 0.34269654 | 0.8692532  | 0.67878924 |
| Q7Z6E9 | RBBP6   | LEVTEIVKPSPK                        | S1179       | 0.38684807 | 1.43557537 | 0.71060254 |
| Q7Z6E9 | RBBP6   | DDATPVRDEPMDAESITFK                 | T984        | 0.71398323 | 0.8835006  | 0.88579187 |
| Q7Z6E9 | RBBP6   | VTGTGSSSTLVDTSTSTGGSPVRK            | T1271       | 0.9544447  | 0.97838518 | 0.98367301 |
| P28749 | RBL1    | VIAIDSDAESPAK                       | S1041       | 0.03015897 | 0.48508918 | 0.4339813  |
| P28749 | RBL1    | RVIAIDSDAESPAK                      | S1041       | 0.0325778  | 0.53993465 | 0.43874459 |
| P28749 | RBL1    | DMQPLSPISVHER                       | S640        | 0.04170026 | 0.44620056 | 0.45441331 |
| P98175 | RBM10   | LASDRRPSPPR                         | S723        | 0.13020838 | 1.20077434 | 0.54344847 |
| P98175 | RBM10   | AHLSENELEALEK                       | S797        | 0.4133272  | 1.21405333 | 0.72148955 |
| P98175 | RBM10   | GLVAAYSGESDSEEEQER                  | S738        | 0.91350976 | 0.96330918 | 0.96738963 |
| Q8IXT5 | RBM12B  | SPQEEDFRCPDSEDFR                    | S839        | 0.91693265 | 0.96826758 | 0.9695353  |
| Q96PK6 | RBM14   | LSESQLSFR                           | S620        | 0.09205604 | 0.26813799 | 0.51218258 |
| Q96PK6 | RBM14   | LSESQLSFR                           | S623        | 0.14302701 | 0.21912389 | 0.55222534 |
| Q96PK6 | RBM14   | QPTPPFFGR                           | T206        | 0.99341263 | 1.00138635 | 0.99772632 |
| Q96T37 | RBM15   | HCAPSPDRSPELSSSR                    | S670,S674   | 0.1996579  | 0.78528188 | 0.58169594 |
| Q96T37 | RBM15   | HLDSPESDRPR                         | S656        | 0.310112   | 4.50080153 | 0.66177455 |
| Q96T37 | RBM15   | DRTPPLLRY                           | T568        | 0.42053623 | 0.85358064 | 0.72484937 |
| Q96T37 | RBM15   | SLSPGGALGYR                         | S294        | 0.86546323 | 0.97035155 | 0.95305732 |
| Q8NDT2 | RBM15B  | TFLEGDWTSFSK                        | S552        | 0.01433075 | 0.60104122 | 0.41362115 |
| Q8NDT2 | RBM15B  | ASGDPGASGMSPR                       | S109        | 0.55708948 | 0.88321571 | 0.800758   |
| Q8NDT2 | RBM15B  | DRTPPHLLYSR                         | T532        | 0.7540278  | 0.84588902 | 0.90767974 |
| Q96125 | RBM17   | RPDPDSDEDEDYERER                    | S155        | 0.39794355 | 0.62544783 | 0.7160132  |
| Q86U06 | RBM23   | SPVREPVNDLPEER                      | S149        | 0.00834976 | 0.5957162  | 0.35749468 |
| P49756 | RBM25   | FEDESDDDVPRK                        | S703        | 0.09195538 | 1.27080534 | 0.51218258 |
| P49756 | RBM25   | QEPSEEEEEEEK                        | S583        | 0.32835786 | 0.81283812 | 0.67305029 |
| P49756 | RBM25   | LGASNSPGQPNSVK                      | S677        | 0.66147611 | 1.04254173 | 0.85592923 |
| Q5T8P6 | RBM26   | EGSTQQLQTTSPK                       | S616        | 0.8021297  | 1.01938883 | 0.92455018 |
| Q96EV2 | RBM33   | DIKEESEDEEEDDEESGR                  | S205        | 0.29624891 | 1.26875769 | 0.65749804 |
| Q96EV2 | RBM33   | EESDEEEDDEESGR                      | S205        | 0.79470182 | 0.95388919 | 0.92361025 |
| P42696 | RBM34   | SVQEGENPDGVR                        | S14         | 0.17094265 | 0.82579355 | 0.56553938 |
| Q14498 | RBM39   | YRSPYSGPK                           | Y95         | 0.01959095 | 1.61580446 | 0.41830815 |
| Q14498 | RBM39   | YRSPYSGPK                           | S97         | 0.0267091  | 1.71937751 | 0.41830815 |
| Q14498 | RBM39   | IGLPHSIK                            | S117        | 0.39160487 | 0.70088867 | 0.71204522 |
| Q14498 | RBM39   | SPVREPIDNLTPPEER                    | S136        | 0.74293166 | 0.90295513 | 0.90061831 |
| P52756 | RBM5    | GLVAAYSGDSNDEEELVER                 | S624        | 0.03305624 | 0.81314367 | 0.43874459 |
| P52756 | RBM5    | GLVAAYSGDSNDEEELVER                 | S624        | 0.39109419 | 1.23100263 | 0.71190718 |
| P78332 | RBM6    | EGETQGVAFEHESPADFQNSQSPVQDQDK       | S362        | 0.11580479 | 0.83850727 | 0.53343618 |
| Q9Y580 | RBM7    | SFSSPENFQR                          | S136        | 0.15343694 | 0.70163792 | 0.55688781 |
| P38159 | RBMX    | GLPPSMER                            | S352        | 0.06168995 | 0.57611918 | 0.47702638 |
| P38159 | RBMX    | DSYSSRSYDLYSSGR                     | S330        | 0.1936278  | 0.83433659 | 0.57728191 |
| P38159 | RBMX    | DVYLSRDRDGYSTK                      | S208        | 0.22554306 | 1.38588885 | 0.6080317  |
| P38159 | RBMX    | DVYLSR                              | S208        | 0.49418135 | 0.85844749 | 0.76357885 |
| P38159 | RBMX    | RDVYLSR                             | S208        | 0.85054704 | 0.96324729 | 0.96454687 |
| P38159 | RBMX    | VEQATKPSFESGR                       | S88         | 0.99048554 | 0.99733843 | 0.99627109 |
| Q9Y388 | RBMX2   | EVQAEQPSSSSPR                       | S188        | 0.3205572  | 0.85705066 | 0.66949605 |
| Q9Y388 | RBMX2   | ADREVAEQPSSSSPR                     | S188        | 0.64944317 | 1.13517742 | 0.84958493 |
| Q9UKL0 | RCOR1   | ERESEDELEEAANGNPIDIEVDQNK           | S257        | 0.94431569 | 1.01603948 | 0.98136469 |
| O94761 | RECQL4  | GRRRPSQDDVEAAPETR                   | S27         | 0.12370036 | 0.71394105 | 0.53975675 |
| O94762 | RECQL5  | YTGEEDGAGGHSAPPQTEECLR              | S815        | 0.04392085 | 1.2852689  | 0.45441331 |
| O94762 | RECQL5  | GEVPGGSAHYGGPSPEK                   | S727        | 0.10360146 | 0.68838814 | 0.52476522 |
| Q6NUK4 | REEP3   | DGDEKTDDEAEGPYSDNEMLTHK             | T201        | 0.1785598  | 0.78477043 | 0.56898248 |
| Q9H6H4 | REEP4   | SFSMQDLR                            | S152        | 0.00087557 | 0.36873978 | 0.25274253 |
| Q96D71 | REPS1   | SHSGTSPDNTAPPMPRPQPSHSR             | S535,S558   | 0.01017018 | 0.45123223 | 0.37254089 |

|        |         |                                      |                   |            |             |            |
|--------|---------|--------------------------------------|-------------------|------------|-------------|------------|
| Q96D71 | REPS1   | RQSSYDDPWK                           | S274              | 0.58959678 | 0.89384438  | 0.82197092 |
| Q96D71 | REPS1   | RQSSYDDPWK                           | S272              | 0.84300144 | 1.02158828  | 0.94383208 |
| Q9P2R6 | RERE    | EEALDDAEEEPSPPPRSPSPEPTVVDTPSHASQSAR | S1106,S1113,S1115 | 0.49862426 | 0.76771086  | 0.76446134 |
| P35251 | RFC1    | HSTSPSLDSEYNEELNEDDSQSDEK            | S1104             | 0.79968191 | 1.04493904  | 0.92455018 |
| Q8WZ73 | RFFL    | VPAEDETQSIDSSEDSFVPGR                | S229              | 0.05972126 | 0.68479674  | 0.47702638 |
| P49796 | RGS3    | DLPAIQESPTR                          | S806              | 0.21912975 | 0.58453743  | 0.60411977 |
| Q6PJF5 | RHBF2   | DLELPSQEAPSFQGTESPKPKC               | T175              | 0.31931451 | 0.74807249  | 0.66811614 |
| Q9NPQ8 | RIC8A   | GLMAGGRPEGQYSEDEDTDTDEYK             | T441,S436         | 0.79733917 | 1.19150158  | 0.92373279 |
| Q6R327 | RICTOR  | NDSGEENVPLDLTR                       | S21               | 0.06074637 | 0.53594151  | 0.47702638 |
| Q6R327 | RICTOR  | GRNDSGEENVPLDLTR                     | S21               | 0.28293912 | 0.81050228  | 0.64790049 |
| Q6R327 | RICTOR  | STELLGVK                             | S1591             | 0.45607541 | 0.8620029   | 0.7402091  |
| Q6R327 | RICTOR  | NDSGEENVPLDLTREPSONLR                | S21               | 0.68839696 | 0.86667053  | 0.86958941 |
| Q6R327 | RICTOR  | ALSYASLDK                            | S1388             | 0.70580668 | 0.84028785  | 0.87976772 |
| Q5UIP0 | RIF1    | SPQRPSDWK                            | S782              | 0.00035279 | 0.52307185  | 0.2160495  |
| Q5UIP0 | RIF1    | ELDPLSVSANDSPSGMQTR                  | S2161             | 0.01494741 | 0.45905001  | 0.41515234 |
| Q5UIP0 | RIF1    | ASQGLLSIENSESDSSEAK                  | S1554             | 0.03849424 | 0.68997898  | 0.44815912 |
| Q5UIP0 | RIF1    | SNESVDIQDQEEK                        | S1579             | 0.25565481 | 0.70257104  | 0.62445047 |
| Q5UIP0 | RIF1    | STDFVFIPEGK                          | T1047             | 0.30505322 | 0.52997939  | 0.6612054  |
| Q5UIP0 | RIF1    | RSQEDEISSPVNK                        | S2196             | 0.32781725 | 0.78760461  | 0.67305029 |
| Q5UIP0 | RIF1    | RASQGLLSIENSESDSSEAK                 | S1542             | 0.47295429 | 0.86671319  | 0.75075773 |
| Q5UIP0 | RIF1    | RASQGLLSIENSESDSSEAK                 | S1556             | 0.47511412 | 0.78832163  | 0.75249201 |
| Q5UIP0 | RIF1    | RDSFDNCSLGESEK                       | S1688             | 0.48062097 | 0.93790686  | 0.75582586 |
| Q5UIP0 | RIF1    | VEEPSQCLASGTAISELIIEDNNASPQK         | S2144             | 0.7666825  | 0.83888764  | 0.91222963 |
| Q8WYP3 | RIN2    | QASFLAEGGAK                          | S366              | 0.05085524 | 0.33980798  | 0.45652016 |
| Q9BRS2 | RIOK1   | VVPGQFDDADSDSENDR                    | S22               | 0.26545906 | 0.81877023  | 0.63400981 |
| Q9BVS4 | RIOK2   | EDSLSEESADAR                         | S380              | 0.54952817 | 0.8860363   | 0.79519958 |
| Q13129 | RLF     | SPSAIPEQNHSLNDQAK                    | S632              | 0.04355789 | 0.84056172  | 0.45441331 |
| Q96TC7 | RMDN3   | SQSLPNSLDYTTQSDPGR                   | S46               | 0.46975627 | 0.79854672  | 0.74934719 |
| O60930 | RNASEH1 | SASPEVSEGHENQHQESEA                  | S76               | 0.3855991  | 0.86311001  | 0.71060254 |
| Q8NCN4 | RNF169  | CPARLSDSENEEPSR                      | S247              | 0.73356992 | 1.08583592  | 0.89605782 |
| Q5VTR2 | RNF20   | SGSALLQSOSTEDPKDEPAELKPDSEDLSSQSSASK | S524              | 0.10357882 | 1.34171747  | 0.52476522 |
| Q5VTR2 | RNF20   | SGSALLQSOSTEDPK                      | S524              | 0.51917993 | 0.80102468  | 0.77589579 |
| Q5VTR2 | RNF20   | ALVVPEPEPDSNSQER                     | S138              | 0.61545944 | 0.90782543  | 0.83347439 |
| Q5VTR2 | RNF20   | ALVVPEPEPDSNSQERK                    | S136              | 0.83976546 | 1.03621639  | 0.9423761  |
| Q63HN8 | RNF213  | DFATPRLSHLSDQSPGK                    | S2273             | 0.42399617 | 0.94057649  | 0.72757489 |
| Q63HN8 | RNF213  | EDQEAELLSEPEEESER                    | S1258             | 0.75812749 | 1.03357997  | 0.90833103 |
| Q5W0B1 | RNF219  | IQSSLSSASPSK                         | S719              | 0.0030697  | 0.50974842  | 0.27314524 |
| Q96BH1 | RNF25   | RESLGLSEK                            | S450              | 0.61637711 | 0.89140017  | 0.83347439 |
| Q96EP0 | RNF31   | RLSAPLPPSCGDPEK                      | S466              | 0.80724993 | 1.08091175  | 0.92610552 |
| Q9BWH6 | RPAP1   | ARPSPGHCLPEDEPEER                    | S80               | 0.44788949 | 0.77238485  | 0.70811209 |
| Q9H6T3 | RPAP3   | NSSQDDLFTSDTPR                       | S481              | 0.23740686 | 0.75303606  | 0.6380317  |
| P30050 | RPL12   | IGPLGLSPK                            | S38               | 0.0703797  | 0.28888759  | 0.49571338 |
| Q6P5R6 | RPL22L1 | YFQISQDEDESESED                      | S118              | 0.98780437 | 0.99243384  | 0.99494412 |
| P62750 | RPL23A  | IRTSPTFR                             | T42               | 0.02208717 | 1.3703982   | 0.41830815 |
| P05386 | RPLP1   | KEESEESDDDMGFLFD                     | S104              | 0.66660511 | 1.17609707  | 0.85839518 |
| P05387 | RPLP2   | KEESEESDDDMGFLFD                     | S102              | 0.40373078 | 1.55857914  | 0.7160132  |
| P78346 | RPP30   | KPRPSEGEDCLPASK                      | S251              | 0.60364661 | 1.05853051  | 0.82794064 |
| O75818 | RPP40   | ISWSFK                               | S168              | 0.90223111 | 0.97888231  | 0.96458226 |
| Q96P16 | RPRD1A  | VDEENCCSLGSPSEPPQTLDLVR              | S156              | 0.8760753  | 1.02801269  | 0.95556965 |
| Q5VT52 | RPRD2   | DVEDMELSDVEDDGSK                     | S374              | 0.52341358 | 0.86082024  | 0.77709199 |
| Q5VT52 | RPRD2   | GPTSTSIDNIDGTPVRDER                  | T723              | 0.52725089 | 1.08026192  | 0.77967028 |
| Q5VT52 | RPRD2   | SFNYSNPSSTSEVSSTSASK                 | S593              | 0.99014544 | 0.99746918  | 0.99621995 |
| Q9NQ39 | RPS10P5 | AEAGAGSATEFQFR                       | S157              | 0.06079213 | 0.61205569  | 0.47702638 |
| P62280 | RPS11   | CPFTGNVSIR                           | S67               | 0.08430817 | 0.47827631  | 0.50397847 |
| P62263 | RPS14   | IEDVTPIPSDSTR                        | S139              | 2.84E-05   | 0.42360713  | 0.0776622  |
| P42677 | RPS27   | LTEGCSFR                             | S78               | 0.02394076 | 0.47154812  | 0.41830815 |
| P42677 | RPS27   | DLLHPSPEEEK                          | S11               | 0.19347362 | 0.75331126  | 0.57728191 |
| P23396 | RPS3    | DEILPTPISEQK                         | T221              | 0.69321956 | 1.04413146  | 0.87196791 |
| P61247 | RPS3A   | ADGYEPPVQESV                         | S263              | 0.06384647 | 0.68622222  | 0.47801576 |
| P61247 | RPS3A   | LMELHGESESSGK                        | S238              | 0.067852   | 0.67533476  | 0.49083932 |
| P62753 | RPS6    | LSSLRASTSK                           | S236,S242         | 0.02312598 | 0.32794246  | 0.41830815 |
| Q15418 | RPS6KA1 | KLPSTTL                              | T733              | 0.12182074 | 0.19059412  | 0.53788543 |
| P51812 | RPS6KA3 | NQSPVLEPVGR                          | S715              | 0.11988281 | 0.69040903  | 0.53759949 |
| Q8N122 | RPTOR   | VLDTSSLTQASAPASPTNK                  | S859,S863         | 0.23575513 | 0.52341874  | 0.6080317  |
| P62070 | RRAS2   | FQEQECPSPPEPTRK                      | S186              | 0.18376808 | 0.92402149  | 0.5727577  |
| P62070 | RRAS2   | KFQEQECPSPPEPTR                      | S186              | 0.21752767 | 0.67724638  | 0.60411977 |
| P62070 | RRAS2   | FQEQECPSPPEPTR                       | S186              | 0.30838173 | 0.74964789  | 0.66139614 |
| Q9P2E9 | RRBP1   | NTDVAQSPPEAK                         | S615              | 0.03421929 | 0.438473604 | 0.43874459 |
| Q9P2E9 | RRBP1   | SHVEDGDIAGAPASSPEAPAEQDPVQLK         | S1277             | 0.95505558 | 0.99347897  | 0.98388755 |
| Q92766 | RREB1   | AATTATPAATTSK                        | S1122             | 0.00592817 | 0.75037862  | 0.31900981 |
| Q92766 | RREB1   | LAEEETEGSPDGESAAEK                   | S1479             | 0.63136193 | 0.86807735  | 0.8405143  |
| P31350 | RRM2    | ENTPPALSGR                           | T33               | 0.02485631 | 0.59110662  | 0.41830815 |
| P31350 | RRM2    | VPLAPITDPQQLQLSPLK                   | S20               | 0.356963   | 0.61154562  | 0.68872861 |
| Q5JTH9 | RRP12   | GDSIEILADSEEDNEEEER                  | S1080             | 0.2649717  | 1.51185605  | 0.63400981 |
| Q5JTH9 | RRP12   | ALSQAAVEEEEEEEPAQGK                  | S1049             | 0.6482105  | 0.87693206  | 0.84948133 |
| Q9Y3B9 | RRP15   | DHFYSDDDAIEADSEGDAEPCDK              | S58               | 0.14414906 | 1.14181818  | 0.55352644 |
| Q9Y3B9 | RRP15   | DHFYSDDDAIEADSEGDAEPCDK              | S67,Y57           | 0.5008465  | 1.8758293   | 0.76563097 |
| Q14684 | RRP1B   | VGDGDLSAEEIPINEVSLR                  | S245              | 0.02010046 | 0.8183172   | 0.41830815 |
| Q14684 | RRP1B   | GSPTGGAQLLK                          | S513              | 0.07019119 | 0.6366344   | 0.49571338 |
| Q14684 | RRP1B   | VAEPGAEATSSGTEEGSEHPAVPMHKN          | S458,T451         | 0.08178557 | 0.62954876  | 0.50397847 |
| Q14684 | RRP1B   | TPTSSPASSPLVAK                       | S732              | 0.11966067 | 0.6839645   | 0.53759949 |

|        |         |                                      |             |            |            |            |
|--------|---------|--------------------------------------|-------------|------------|------------|------------|
| Q14684 | RRP1B   | SILVSPTGPSR                          | T708        | 0.12769408 | 0.57277473 | 0.5403576  |
| Q14684 | RRP1B   | VAEPGAEATSTGEEESGSEHPPAVPMHKN        | S458        | 0.19966472 | 0.76231634 | 0.58169594 |
| Q14684 | RRP1B   | VGDDGLSAEEIPIENEVSLRR                | S245        | 0.76187183 | 1.07460532 | 0.90951853 |
| Q96T23 | RSF1    | NSSQQDNSSRESPLDEETK                  | S227        | 0.11209205 | 1.37194912 | 0.53343618 |
| Q96T23 | RSF1    | STLESEKPGSPEAAETSPPSNIIDHCEK         | T628,S622   | 0.16176871 | 1.20501139 | 0.55797736 |
| Q96T23 | RSF1    | VGSPLDYSLVDLPSTNGQSPGK               | S1359,S1375 | 0.25774132 | 1.78125924 | 0.62621067 |
| Q96T23 | RSF1    | STLESEKPGSPEAAETSPPSNIIDHCEK         | S622        | 0.50984268 | 1.29471706 | 0.77080692 |
| Q96T23 | RSF1    | IESDEEEDFENVGK                       | S1345       | 0.56201119 | 0.94697943 | 0.80548023 |
| Q96T23 | RSF1    | DAQRLSPIEEVPK                        | S604        | 0.76311309 | 1.05462185 | 0.91002821 |
| Q96T23 | RSF1    | IETDEEESCDNAHGDNANQPAR               | T1305       | 0.84160596 | 1.03562622 | 0.94290531 |
| O76021 | RSL1D1  | ATNESEDEIPLQVPIGK                    | T358        | 0.27953172 | 0.88288096 | 0.6455595  |
| Q7L4I2 | RSRC2   | EQSEVSVSPR                           | S32         | 0.09201947 | 1.20187375 | 0.51218258 |
| Q7L4I2 | RSRC2   | AASDTERDGLAPEK                       | S4          | 0.3635995  | 1.20262097 | 0.69530077 |
| Q9BY42 | RTFDC1  | SLFTTHSSAK                           | S287        | 0.42103213 | 0.85765509 | 0.72501733 |
| Q9NQ3  | RTN4    | RGSSGVDETLFALPAASEPVIR               | S184        | 0.51490083 | 1.57110199 | 0.77403686 |
| A6NKF1 | SAC3D1  | TLEEVMAEEDEGTDORPGSPA                | S402        | 0.83090984 | 0.96895058 | 0.9376322  |
| Q15424 | SAFB    | EESSELEQPFQADTSSVGPDRK               | S235        | 0.00925075 | 1.37240664 | 0.37254089 |
| Q15424 | SAFB    | TDCEPVLGPAVEQSSAAEELAEAPTEAPSPEAR    | S344        | 0.11502239 | 2.67839364 | 0.53343618 |
| Q15424 | SAFB    | EESSELEQPFQADTSSVGPDR                | S246        | 0.1404009  | 0.73307056 | 0.54797298 |
| Q15424 | SAFB    | RSVVSFDK                             | S604        | 0.31265907 | 1.22088353 | 0.6622373  |
| Q15424 | SAFB    | SVVSFDK                              | S604        | 0.48343045 | 0.84272554 | 0.75785402 |
| Q15424 | SAFB    | EESSELEQPFQADTSSVGPDRK               | S246        | 0.58190726 | 0.93609251 | 0.81832936 |
| Q15424 | SAFB    | RSVVSFDK                             | S601        | 0.58543456 | 0.88887662 | 0.8200322  |
| Q9Y3Z3 | SAMHD1  | TPSNTPSAEADWSPLGELHPDYK              | S27         | 0.04422906 | 1.90272125 | 0.45441331 |
| Q9UHR5 | SAP30BP | GGLVSDAYGEDDFSR                      | S43         | 0.56830873 | 0.93225657 | 0.81213911 |
| Q9H7N4 | SCAF1   | EAASSSSGTQPAPPAPASPWDSK              | S548        | 0.09380089 | 0.82178804 | 0.51670111 |
| Q9H7N4 | SCAF1   | FDIYDPFHPTDEAYSPPAPEQK               | S239        | 0.13988918 | 1.4391951  | 0.54797298 |
| Q9H7N4 | SCAF1   | QRSPSPAPAPAAAAAGPPTR                 | S498,S500   | 0.18257708 | 0.75722543 | 0.57200583 |
| Q9H7N4 | SCAF1   | AAPPPALTPDSQTVDSCKTPEVSFLPEATEEAGVR  | T1001,S1005 | 0.4299885  | 1.55539052 | 0.73021716 |
| Q9H7N4 | SCAF1   | REVLYDSEGLSGEER                      | S734,S738   | 0.60502194 | 1.05158123 | 0.82916655 |
| Q9H7N4 | SCAF1   | AAPPPALTPDSQTVDSCK                   | T989        | 0.62706217 | 0.82921388 | 0.83899389 |
| Q9H7N4 | SCAF1   | TPEVSFLPEATEEAGVR                    | T1001       | 0.62865919 | 0.93796993 | 0.83899389 |
| Q99590 | SCAF11  | SSNSDVSDEETAESDTPVLEK                | S405        | 0.03053174 | 0.6830567  | 0.43445387 |
| Q99590 | SCAF11  | FHSPSTTWSPNK                         | S796,S802   | 0.05759119 | 0.59198505 | 0.47702638 |
| Q99590 | SCAF11  | TEELIESPKLESSEGEIHTVDR               | S608        | 0.05860504 | 2.21321347 | 0.47702638 |
| Q99590 | SCAF11  | LESSEGEIHTVDR                        | S614        | 0.06884966 | 0.72639768 | 0.49170374 |
| Q99590 | SCAF11  | VETVSQPSSEPK                         | S771,S776   | 0.10416861 | 0.8499604  | 0.52476522 |
| Q99590 | SCAF11  | TEELIESPKLESSEGEIHTVDR               | T602,S614   | 0.1102109  | 2.16154684 | 0.53343618 |
| Q99590 | SCAF11  | AETASQSRSPISDNGCDAPGNSNPSLSVPSAAESEK | S338        | 0.57740576 | 0.93383138 | 0.81432655 |
| Q99590 | SCAF11  | AETASQSRSPISDNGCDAPGNSNPSLSVPSAAESEK | T331        | 0.59953629 | 0.92428831 | 0.82561275 |
| Q99590 | SCAF11  | SPISDNGCDAPGNSNPSLSVPSAAESEK         | S338        | 0.67570532 | 0.80248813 | 0.8617255  |
| Q99590 | SCAF11  | VETVSQPSSEPK                         | S776        | 0.69462406 | 1.04750205 | 0.87245997 |
| Q99590 | SCAF11  | TEELIESPK                            | S608        | 0.98167042 | 1.00982422 | 0.99355276 |
| Q9UPN6 | SCAF8   | ETVQTTQSPTPVEK                       | S617        | 1          | 1          | 1          |
| Q12770 | SCAP    | RDSGVGSGLEAQESWER                    | S826        | 0.56377066 | 1.10808499 | 0.80766478 |
| Q8WVM8 | SCFD1   | VNLEESSGVENS PAGARPK                 | S297        | 0.13610765 | 0.66243649 | 0.54761068 |
| Q14160 | SCRIB   | LALDGETLGEEEQEDEQPPWASPSPTS          | S1439       | 0.15693375 | 1.27834182 | 0.55688781 |
| Q14160 | SCRIB   | VQSPPEPPAPER                         | S1475       | 0.23826048 | 0.80284325 | 0.6091827  |
| Q14160 | SCRIB   | SEACPCQPDGSGPLPAEEK                  | S504        | 0.2548034  | 0.71130564 | 0.6238345  |
| Q14160 | SCRIB   | LAEAPSPAPTPSPVEDLGPQTSTSPGRSPDFAEELR | S1566       | 0.26951679 | 3.16823672 | 0.63502787 |
| Q14160 | SCRIB   | RSEACPCQPDGSGPLPAEEK                 | S504        | 0.32789353 | 0.84458887 | 0.63505029 |
| Q14160 | SCRIB   | ALSPAELR                             | S1486       | 0.35088247 | 0.7909846  | 0.68418829 |
| Q14160 | SCRIB   | NSLESISSIDR                          | S1220       | 0.40753572 | 0.76659694 | 0.71690855 |
| Q14160 | SCRIB   | LAEAPSPAPTPSPVEDLGPQTSTSPGRSPDFAEELR | S1561,S1566 | 0.41247308 | 1.55871546 | 0.72049544 |
| Q14160 | SCRIB   | LRVQSPPEPPAPER                       | S1475       | 0.50423276 | 0.90193966 | 0.76766855 |
| Q14160 | SCRIB   | MVEPENAVITPLRPEDDYSR                 | S835        | 0.57730567 | 0.89184251 | 0.81432655 |
| Q14160 | SCRIB   | LALDGETLGEEEQEDEQPPWASPSPTS          | S1437       | 0.58750177 | 1.08436896 | 0.82150065 |
| Q14160 | SCRIB   | NSLESISSIDRELSPEGPGK                 | S1225       | 0.6612191  | 1.15679671 | 0.85592923 |
| Q14160 | SCRIB   | SLEQDALR                             | S1508       | 0.69169589 | 0.89259717 | 0.8713243  |
| Q14160 | SCRIB   | EGAVVSAPSVK                          | S703        | 0.77960558 | 1.06488715 | 0.91574407 |
| Q14160 | SCRIB   | QSPASPPPLGGGAPVR                     | S1448       | 0.90860899 | 0.96831656 | 0.9669909  |
| Q9NVU7 | SDAD1   | YIEIDSDEEPRGELLSLR                   | S585        | 0.07556784 | 1.94166418 | 0.50397847 |
| Q9NVU7 | SDAD1   | YIEIDSDEEPR                          | S585        | 0.52841326 | 0.86257142 | 0.78105376 |
| P18827 | SDC1    | DEGSYSLEEPK                          | S287        | 0.148754   | 0.75298888 | 0.55352644 |
| P18827 | SDC1    | DEGSYSLEEPK                          | S285        | 0.22260385 | 0.71160856 | 0.6080317  |
| Q96C92 | SDCCAG3 | VSPASPAGSPSADFAVHGESLGDR             | S243,S247   | 0.2004858  | 0.65522846 | 0.58169594 |
| Q6IQ49 | SDE2    | VVNTDHGSPPELQIPVTDSGR                | S278        | 0.86316239 | 1.0485867  | 0.95161386 |
| O15027 | SEC16A  | FTGSFDDDPHPRDPYGEVDR                 | S1149       | 0.34687576 | 1.64680813 | 0.68148324 |
| O15027 | SEC16A  | QIDSPVGGGETDETTVSQNYR                | S391        | 0.46762502 | 1.07995663 | 0.74813177 |
| O15027 | SEC16A  | QIDSPVGGGETDETTVSQNYR                | T397        | 0.91373939 | 0.98600823 | 0.96738963 |
| O15027 | SEC16A  | ADSGTQPPLSLSPAPETK                   | S1905       | 0.94157584 | 0.98518519 | 0.97939813 |
| O75396 | SEC22B  | NLGSINTELQDVQR                       | S137        | 0.03310963 | 1.95176039 | 0.43874459 |
| O94979 | SEC31A  | DSDQVAQSDGEESPAEEQLLGEHIK            | S527,S532   | 0.30773576 | 1.62536926 | 0.66139614 |
| O94979 | SEC31A  | DSDQVAQSDGEESPAEEQLLGEHIK            | S527        | 0.74202839 | 1.04390638 | 0.90061831 |
| P60468 | SEC61B  | PGPTPSGTNVGSSGRSPSK                  | S17         | 0.49338541 | 1.26451841 | 0.76351366 |
| Q99442 | SEC62   | EELEQQTGDGCEDEEEENDGETPK             | T375        | 0.06530636 | 1.17976319 | 0.48577778 |
| Q99442 | SEC62   | SQHSSGNNGDFEMITK                     | S356        | 0.3108044  | 1.32418944 | 0.66197301 |
| Q99442 | SEC62   | SQHSSGNNGDFEMITK                     | S357        | 0.33581401 | 1.20211617 | 0.67736506 |
| Q9H4L4 | SENP3   | SPLDPDSGLLSCTLPNGFGGQSGPEGER         | S232        | 0.63703271 | 1.19109712 | 0.8428508  |
| Q9H4L4 | SENP3   | NHLSPPQGGATPQVPSPPCR                 | S169,S181   | 0.74897692 | 0.90325686 | 0.90421302 |
| Q9GZR1 | SENP6   | ESISQPADACSAPPSTGK                   | S352        | 0.15074599 | 0.59612749 | 0.55645143 |

|        |          |                                           |           |            |            |            |
|--------|----------|-------------------------------------------|-----------|------------|------------|------------|
| Q15019 | SEPT2    | IYHLPDAESEDEDFK                           | S218      | 0.32404183 | 1.05798139 | 0.67067311 |
| Q9UHD8 | SEPT9    | RSFEVEEVETPNSTPPR                         | S30       | 0.25801281 | 1.42857143 | 0.62621067 |
| Q9UHD8 | SEPT9    | SFEVEEVETPNSTPPR                          | T42,S30   | 0.29703098 | 0.63032336 | 0.65749804 |
| Q9UHD8 | SEPT9    | SFEVEEVETPNSTPPR                          | S30       | 0.50175069 | 1.28168463 | 0.76563097 |
| Q9UHD8 | SEPT9    | LGDSGSPALK                                | S22       | 0.52563973 | 1.20066629 | 0.77862505 |
| Q9UHD8 | SEPT9    | SFEVEEVETPNSTPPR                          | S30       | 0.92416896 | 1.02235469 | 0.97185899 |
| Q8NC51 | SERBP1   | QISYNYSDLDQSNVTEETPEGEEHHPVADTENK         | S243      | 0.04828025 | 0.6991954  | 0.45625798 |
| Q8NC51 | SERBP1   | QISYNYSDLDQSNVTEETPEGEEHHPVADTENK         | S252      | 0.05327765 | 0.47975355 | 0.46689115 |
| Q8NC51 | SERBP1   | QISYNYSDLDQSNVTEETPEGEEHHPVADTENK         | S247      | 0.13765836 | 0.71985816 | 0.54797298 |
| Q8NC51 | SERBP1   | SSASAPVDVDDPEAFPALA                       | S392      | 0.38255503 | 0.82485876 | 0.70884547 |
| Q8NC51 | SERBP1   | SSFHSHYGLK                                | S202      | 0.88681999 | 1.03351615 | 0.95863404 |
| Q8NC51 | SERBP1   | HSGSDRSFSHSHYGLK                          | S203      | 0.97357254 | 1.01812427 | 0.98966465 |
| Q9NRX5 | SERINC1  | SDGSLDGDDVHR                              | S364      | 0.03775974 | 2.09092458 | 0.44815912 |
| Q01105 | SET      | LNEQASEEILK                               | S63       | 0.88869852 | 0.95581585 | 0.95935633 |
| O15047 | SETD1A   | RPRPSTAAEEDDDPEQEK                        | T916      | 0.34919866 | 1.38696419 | 0.68370676 |
| O15047 | SETD1A   | DTGSEVPSGSGHGCTPPAPANFEDVAPTGSGEPTATRESPK | S565,T526 | 0.40007207 | 0.94287185 | 0.7160132  |
| O15047 | SETD1A   | SGSPAPETTNESVPAFAQHSSLSDR                 | S470      | 0.52681425 | 0.87187053 | 0.77967028 |
| Q9BYW2 | SETD2    | SESPFRETEPLVSPHQDK                        | S744,S754 | 0.33588877 | 0.69750843 | 0.67736506 |
| Q9BYW2 | SETD2    | SESPFRETEPLVSPHQDK                        | S744      | 0.94047151 | 1.0180404  | 0.97922223 |
| Q9COA6 | SETD5    | VTVSSDHEEVDNPEEKPEEEK                     | S477      | 0.777162   | 0.94776931 | 0.91412088 |
| Q15637 | SF1      | TGDLGIPPNEPDRSPSEPIYNSEGK                 | S80,S89   | 0.82780068 | 1.05675589 | 0.9364171  |
| Q15637 | SF1      | TGDLGIPPNEPDRSPSEPIYNSEGK                 | Y87,S80   | 0.84999884 | 0.94532578 | 0.94645687 |
| Q15459 | SF3A1    | AEEPSSQLDQDTQVQDMDEGSDDEEGQK              | S359      | 0.92048208 | 1.01663051 | 0.97124396 |
| O75533 | SF3B1    | LSSWDQAETPGHTPSLR                         | T223,T227 | 0.15845454 | 0.57133937 | 0.55688781 |
| O75533 | SF3B1    | WDQTDADQTPGATPK                           | T207      | 0.27015611 | 1.15290857 | 0.83502787 |
| O75533 | SF3B1    | WDQTDADQTPGATPK                           | T211      | 0.36478669 | 0.79487273 | 0.69618384 |
| Q13435 | SF3B2    | SSLGQASASEEEDTVSVSK                       | S309      | 0.77568804 | 1.0400418  | 0.91412088 |
| Q12872 | SF5WAP   | SGVSSDNEDDDDDEEDGNLHPSLFASK               | S283      | 0.57430246 | 1.09917355 | 0.81432655 |
| O95562 | SFT2D2   | VLSGQDTEDR                                | S9        | 0.03421309 | 1.8808167  | 0.43874459 |
| Q86YV5 | SGK223   | TCSDDGGPSELLAHSPTNSGK                     | T782      | 0.04142892 | 1.57802747 | 0.45441331 |
| Q86YV5 | SGK223   | IEEEEEVEQLLSHWSGR                         | S651      | 0.25832833 | 2.2344461  | 0.62621067 |
| Q86YV5 | SGK223   | SASFAFEFPK                                | S694      | 0.35824556 | 1.56677615 | 0.69004346 |
| Q86YV5 | SGK223   | DCSPTCWEQGK                               | S285      | 0.38942584 | 0.7125522  | 0.71060254 |
| Q86YV5 | SGK223   | CSPSGDSEGEYCSILDCCPGSPVAK                 | S263      | 0.454155   | 0.86005305 | 0.73882557 |
| Q86YV5 | SGK223   | EATQPEPIYAESTK                            | Y411      | 0.505698   | 0.86447487 | 0.76766855 |
| Q86YV5 | SGK223   | GPVQNSNEVGEETSAGQGLSSR                    | S508      | 0.51222955 | 1.36532018 | 0.77271948 |
| Q86YV5 | SGK223   | VSQGSASELSPSFR                            | S743      | 0.89206778 | 0.98432132 | 0.96024802 |
| Q9BX95 | SGPP1    | NSLTGEEGQLAR                              | S112      | 0.27479032 | 0.80210376 | 0.64019666 |
| Q9BX95 | SGPP1    | RNSLTGEEGQLAR                             | T114      | 0.61674786 | 0.94302767 | 0.83347439 |
| Q9BX95 | SGPP1    | RNSLTGEEGQLAR                             | S112      | 0.96692991 | 0.99642432 | 0.98758099 |
| Q9BRG2 | SH2D3A   | TSSDPVLLK                                 | S180      | 0.63866053 | 0.95364605 | 0.84338453 |
| Q9BRG2 | SH2D3A   | SFSEDTLMDGPAR                             | S125      | 0.84559777 | 1.01966523 | 0.94461198 |
| Q9H788 | SH2D4A   | TLSSAQEDIIR                               | S317      | 0.78578099 | 1.04308378 | 0.92039443 |
| Q9H788 | SH2D4A   | TLSSAQEDIIR                               | S315      | 0.87739831 | 1.01668806 | 0.95556965 |
| Q7L8J4 | SH3BP5L  | GLSDHVLSDGQELGTR                          | S362      | 0.01645948 | 2.25130057 | 0.41830815 |
| Q7L8J4 | SH3BP5L  | ETPQGLRPEVVEDEVPRSPVAEPPGGGSSSSEAK        | S30       | 0.20196183 | 1.3911589  | 0.58254318 |
| Q96B97 | SH3KBP1  | RPPSSQLTSSSLSPDIFDPSPEEDK                 | S511      | 0.37350496 | 1.56477294 | 0.70215671 |
| Q96B97 | SH3KBP1  | SIEVENDFLPVEK                             | S230      | 0.9944763  | 0.99871461 | 0.99772632 |
| Q5TCZ1 | SH3PXD2A | EAEEGPTGASESQDSPRK                        | S547      | 0.46449628 | 1.09212955 | 0.74579264 |
| Q15464 | SHB      | HGSPFCGILGER                              | S388      | 0.09518108 | 0.55166564 | 0.51670111 |
| Q2M3G4 | SHROOM1  | WCFSEPGK                                  | S224      | 0.05774614 | 0.61508291 | 0.61502638 |
| Q8TF72 | SHROOM3  | DRPGSPESPLLDAPFSR                         | S910      | 0.34529496 | 1.19827589 | 0.68023038 |
| Q6IA17 | SIGIRR   | SSEVDVSLGSRNYSAR                          | S388      | 0.29594692 | 3.11632759 | 0.65749804 |
| P57059 | SIK1     | RASDTSLTQGLK                              | S575      | 0.13922786 | 0.61001026 | 0.54797298 |
| Q96ST3 | SIN3A    | GDLSDVVEEEEEEMDVDEATGAVK                  | S832      | 0.18558479 | 2.00736615 | 0.5733231  |
| Q96ST3 | SIN3A    | SDSPAQLR                                  | S940      | 0.2567771  | 0.78989139 | 0.6258601  |
| Q96ST3 | SIN3A    | YMNSDTSPELR                               | S1112     | 0.67374997 | 0.94810603 | 0.86131187 |
| Q96F54 | SIPA1    | SGSDAGEARPTTASPR                          | S55       | 0.16733123 | 0.81303817 | 0.56312413 |
| O43166 | SIPA1L1  | LIDLESPTPESQK                             | S1549     | 0.12702022 | 0.75754363 | 0.5403576  |
| O43166 | SIPA1L1  | TLSDSEIYNSQR                              | S1585     | 0.83525542 | 1.01461661 | 0.9396472  |
| O60292 | SIPA1L3  | DVEFQDGWPRSPGR                            | S158      | 0.1396228  | 0.79233911 | 0.54797298 |
| O60292 | SIPA1L3  | EVSPAPAVAGQSK                             | S1364     | 0.22563125 | 1.24674556 | 0.6080317  |
| O60292 | SIPA1L3  | SSKPEGEAGRSPGEADEGR                       | S317      | 0.22685581 | 0.78717777 | 0.6080317  |
| O60292 | SIPA1L3  | SSSEITLSECDADAGEPR                        | S171      | 0.39752668 | 0.82370349 | 0.7160132  |
| O60292 | SIPA1L3  | TLSDSELSCSR                               | S1544     | 0.53808276 | 1.07423581 | 0.7873241  |
| O60292 | SIPA1L3  | SSSEITLSECDADAGEPR                        | S172      | 0.55208368 | 0.80271331 | 0.79722272 |
| O60292 | SIPA1L3  | AHSLGLDPAFTSTEDLNCK                       | T402      | 0.6398434  | 0.82868463 | 0.84405606 |
| O60292 | SIPA1L3  | LIIMDNLGPQEERDTGQSPQK                     | S1534     | 0.66508517 | 0.80864803 | 0.85781103 |
| O60292 | SIPA1L3  | LYSSGSSPTGLAGGSR                          | S1382     | 0.98328904 | 0.99432307 | 0.99396755 |
| Q96EB6 | SIRT1    | DGPGLESPGPEGGAAPER                        | S47       | 0.11335993 | 1.27011494 | 0.53343618 |
| Q96EB6 | SIRT1    | SPGPEGGAAPER                              | S47       | 0.88240833 | 0.97159647 | 0.95761744 |
| Q8IX90 | SKA3     | SPQLSDFGLER                               | S155      | 0.07613235 | 0.55156816 | 0.50397847 |
| Q8IX90 | SKA3     | NSVHEQEAINDPELNCENCFQK                    | S119      | 0.50515767 | 0.95054945 | 0.76766855 |
| Q8IX90 | SKA3     | KNSVHEQEAINDPELNCENCFQK                   | S110      | 0.80358536 | 0.89712356 | 0.92467356 |
| Q15477 | SKIV2L   | GDTVASPCSAPLAR                            | S245      | 0.10794028 | 0.65635678 | 0.53106619 |
| Q15477 | SKIV2L   | ASSLEDLVK                                 | S256      | 0.89770609 | 1.01101062 | 0.96293924 |
| P55011 | SLC12A2  | QTPADGEASGESEPAK                          | T266      | 0.12394899 | 0.75091588 | 0.53975675 |
| P55011 | SLC12A2  | EPFEDGFANGEEESTPTR                        | S126      | 0.16809724 | 0.75401571 | 0.56312413 |
| P55011 | SLC12A2  | EGLDISHLQGGQELLSSQEK                      | S940      | 0.30041638 | 0.71644657 | 0.65817287 |
| P55011 | SLC12A2  | DEGPAAGDGLGRPLGPTPSQSR                    | S77       | 0.60568825 | 0.80936178 | 0.82953421 |
| P55011 | SLC12A2  | DGGGVRDEGPAAGDGLGRPLGPTPSQSR              | S77       | 0.96009135 | 1.01763816 | 0.98502328 |

|        |           |                                      |           |            |            |             |
|--------|-----------|--------------------------------------|-----------|------------|------------|-------------|
| Q9UP95 | SLC12A4   | LESLSYDEEDESAVGADK                   | S967      | 0.93993768 | 1.01099117 | 0.97922223  |
| Q9Y666 | SLC12A7   | TEAPGTPEGPEPERPSPGDGNPR              | T30,S40   | 0.06920652 | 0.51936625 | 0.49170374  |
| P53985 | SLC16A1   | EEETSIDVAGKPNVTK                     | S467      | 0.43118238 | 1.05893074 | 0.73034023  |
| P43007 | SLC1A4    | SEEETSPLVTHQNPAGPVASAPELESK          | S507      | 0.97500571 | 0.99432756 | 0.98993501  |
| Q15758 | SLC1A5    | TESRSTPELIQVK                        | S493      | 0.00297795 | 1.84678411 | 0.27314524  |
| Q15758 | SLC1A5    | TESRSTPELIQVK                        | S491      | 0.06924399 | 1.38590256 | 0.49170374  |
| Q15758 | SLC1A5    | STEPELIQVK                           | T494      | 0.70276943 | 1.06541698 | 0.87693402  |
| P11166 | SLC2A1    | TPEELFHPLGADSQV                      | S490      | 0.57234956 | 0.76261697 | 0.81432655  |
| Q9Y6M5 | SLC30A1   | STRPGSSDINVPAGEQPDQEETNTLVANTSNSNGLK | T168      | 0.48616495 | 1.38348705 | 0.75953527  |
| Q8N357 | SLC35F6   | LLGGTRTPINDAS                        | T365      | 0.77486593 | 0.93916134 | 0.91412088  |
| Q9ULF5 | SLC39A10  | LNETELTDLEGGQESPPK                   | S591      | 0.36262913 | 0.76215025 | 0.69383041  |
| Q13433 | SLC39A6   | YESQLSTNEEK                          | S478      | 0.14005562 | 0.78319202 | 0.54797298  |
| Q96NT5 | SLC46A1   | ADPHLEFQQFPQSP                       | S458      | 0.19332584 | 0.61773225 | 0.57728191  |
| Q9BWU0 | SLC4A1AP  | MLGEDSDEEEEMDTSERK                   | S312      | 0.7601791  | 1.24112978 | 0.90891497  |
| Q9BWU0 | SLC4A1AP  | MLGEDSDEEEEMDTSER                    | S312      | 0.89086198 | 0.95740904 | 0.95998402  |
| P04920 | SLC4A2    | RRPGASPTGETPTIEEGEEDEEASEAEGAR       | S132      | 0.05774235 | 0.83733014 | 0.47702638  |
| P04920 | SLC4A2    | TSPSSPAPLPHQEATPR                    | S173      | 0.17129905 | 0.69426752 | 0.56561687  |
| P04920 | SLC4A2    | RRPGASPTGETPTIEEGEEDEEASEAEGAR       | T115      | 0.18560354 | 0.78419011 | 0.57433231  |
| P04920 | SLC4A2    | RRPGASPTGETPTIEEGEEDEEASEAEGAR       | T118      | 0.32338676 | 0.84802043 | 0.6705262   |
| Q9Y6M7 | SLC4A7    | EDGRESYSVDTPSQR                      | S84       | 0.23592529 | 1.22829582 | 0.6080317   |
| Q9Y6M7 | SLC4A7    | GNGSGSRENSTVDFSK                     | S403      | 0.85659578 | 1.01314966 | 0.94981193  |
| P31641 | SLC6A6    | SPGTRPEDEAEGKPPQR                    | T28       | 0.00082897 | 0.32646901 | 0.25274253  |
| P31641 | SLC6A6    | DILKPSPGK                            | S21       | 0.01594876 | 0.3536236  | 0.41830815  |
| Q9UPY5 | SLC7A11   | LPSLGNK                              | S26       | 0.40758041 | 0.78605619 | 0.71690855  |
| Q01650 | SLC7A5    | SADGSAPAGEGEGVTLQR                   | S31       | 0.85746036 | 0.98624932 | 0.90515878  |
| P19634 | SLC9A1    | IGSDPLAYEPK                          | S703      | 0.14500179 | 0.79159669 | 0.55352644  |
| P19634 | SLC9A1    | ETSSPGTDDVFTAPSDSPSSQR               | S785      | 0.24260412 | 0.74816173 | 0.61278278  |
| P19634 | SLC9A1    | CLSDPDPHPPEGEPFFPK                   | S796      | 0.33631948 | 0.82232055 | 0.574336506 |
| O14745 | SLC9A3R1  | SASSDTEELNSQDSPPK                    | S288      | 0.04784931 | 0.69125683 | 0.45625798  |
| O14745 | SLC9A3R1  | SASSDTEELNSQDSPPK                    | S294      | 0.11546366 | 0.78999019 | 0.53343618  |
| O14745 | SLC9A3R1  | SASSDTEELNSQDSPPK                    | S288,S302 | 0.17878522 | 0.3839579  | 0.56898248  |
| O14745 | SLC9A3R1  | EALAAEALESPPALVR                     | S280      | 0.98754821 | 1.00603587 | 0.99494412  |
| Q96T83 | SLC9A7    | SSSEEVLER                            | S694      | 0.16298642 | 0.74253301 | 0.55797736  |
| Q9H2G2 | SLK       | VDESDAEDTQNSDQK                      | S571      | 0.33002371 | 0.8824744  | 0.67434984  |
| Q9H2G2 | SLK       | RASSDLSIASSEEDK                      | S347      | 0.37426791 | 1.31201015 | 0.7024407   |
| Q9NWH9 | SLTM      | SPGHMVLQDTK                          | S553      | 0.17061243 | 0.74889625 | 0.56526141  |
| Q9NWH9 | SLTM      | DGQDAIAQSPK                          | S289      | 0.47782119 | 0.94921316 | 0.75480345  |
| Q8IY92 | SLX4      | SPGLLDTTPIR                          | S1469     | 0.8183627  | 0.88124201 | 0.93202418  |
| Q9H4L7 | SMARCAD1  | KLSSSEPEEDEFNDQSIK                   | Y217,S214 | 4.51E-05   | 0.59179331 | 0.0776622   |
| Q9H4L7 | SMARCAD1  | KASISYFK                             | S79       | 0.83009539 | 0.93882547 | 0.93702016  |
| Q92922 | SMARCC1   | KHSPSPPTPTESR                        | S328,S330 | 0.09576346 | 0.70158625 | 0.51670111  |
| Q92922 | SMARCC1   | HSPSPPTPTESR                         | S328,S330 | 0.93085012 | 0.9852428  | 0.97583851  |
| Q8TAQ2 | SMARCC2   | TLTDEVNSPDSDR                        | S283      | 0.23149661 | 0.707105   | 0.6080317   |
| Q8TAQ2 | SMARCC2   | DMDEPSPVNPVEEVLTK                    | S347      | 0.6157678  | 1.03262787 | 0.83347439  |
| Q8TAQ2 | SMARCC2   | TLTDEVNSPDSDRR                       | S283      | 0.78892809 | 0.95789474 | 0.92135244  |
| Q8TAQ2 | SMARCC2   | TLTDEVNSPDSDRR                       | S286      | 0.84407747 | 1.01909222 | 0.94383208  |
| Q9UQE7 | SMC3      | KGDVEGSQSDQDEGGSGESER                | S1067     | 0.08964724 | 0.88501995 | 0.51018936  |
| Q9NTJ3 | SMC4      | EEGPPPPSPDGASSDAEPEPPSGR             | S28       | 0.18940639 | 0.72753744 | 0.57509931  |
| Q9NTJ3 | SMC4      | REEGPPPPSPDGASSDAEPEPPSGR            | S27       | 0.26815791 | 0.71538462 | 0.63502787  |
| Q9NTJ3 | SMC4      | TESPATAAETAASELDNR                   | T39       | 0.404046   | 0.87230697 | 0.7160132   |
| Q9NTJ3 | SMC4      | TESPATAAETAASELDNR                   | S41       | 0.44835987 | 0.86934278 | 0.73811209  |
| Q9NTJ3 | SMC4      | REEGPPPPSPDGASSDAEPEPPSGR            | S28       | 0.53722139 | 0.8446644  | 0.78705986  |
| Q5MIZ7 | SMEK2     | GSLVGLVDYDPDEEEDDEESSPRK             | S840      | 0.01872737 | 0.5149964  | 0.41830815  |
| Q92540 | SMG7      | SPPHHSFGQYQQADASK                    | S781      | 0.01412058 | 0.52427185 | 0.41362115  |
| Q8ND04 | SMG8      | NESSPAPPDSDDK                        | S668      | 0.27663567 | 0.84189395 | 0.8415712   |
| Q9HOW8 | SMG9      | RDASEETSVMQK                         | S53       | 0.41486173 | 1.26280421 | 0.72306872  |
| Q9HOW8 | SMG9      | EPGSGGPNLNSGPGGR                     | S32       | 0.59625716 | 0.92636139 | 0.82338978  |
| PODJ93 | SMIM13    | ELVGDGTSGQEGDHEPSGSETEEDTSSSPHR      | S60       | 0.82290104 | 1.04857201 | 0.93447109  |
| PODJ93 | SMIM13    | ELVGDGTSGQEGDHEPSGSETEEDTSSSPHR      | S58,S60   | 0.9329403  | 1.02639873 | 0.97583851  |
| Q16637 | SMN1;SMN2 | GTGQSDSDIWDOTALIK                    | S31       | 0.1550449  | 1.38641115 | 0.55688781  |
| Q16637 | SMN1;SMN2 | GTGQSDSDIWDOTALIK                    | S28       | 0.19227135 | 1.3280356  | 0.57728191  |
| Q16637 | SMN1;SMN2 | RGTGQSDSDIWDOTALIK                   | S28       | 0.300718   | 1.5810174  | 0.65817287  |
| P53814 | SMTN      | TTSPEPQESPTLPSTEGQVVNK               | S245      | 0.20774159 | 0.66807825 | 0.59226675  |
| O00161 | SNAP23    | TTWGDGGENSPCNVVSK                    | S110      | 0.0068764  | 0.74546952 | 0.34322215  |
| Q8TAD8 | SNIP1     | QERLSPVAPPADR                        | S35       | 0.58824404 | 1.12820513 | 0.82160635  |
| Q8TAD8 | SNIP1     | RPDHSGGSPPTSEPAR                     | S49,S54   | 0.80027594 | 0.96066434 | 0.92455018  |
| Q8TAD8 | SNIP1     | RPDHSGGSPPTSEPAR                     | S52       | 0.95643555 | 1.00551044 | 0.98388755  |
| Q9NRH2 | SNRK      | ASPSENNAGGSSPSGSGGNPTNTSGTTR         | S607      | 0.05683054 | 0.70026015 | 0.47702638  |
| O75643 | SNRNP200  | EEASDDMEGDEAVVR                      | S225      | 0.10102227 | 0.59616491 | 0.52414255  |
| Q8VVK2 | SNRNP27   | VDGSVNAYAINVSQK                      | S132      | 0.32725194 | 0.76537219 | 0.67305029  |
| P08621 | SNRNP70   | GGGGDMAEPSEAGDAPPDGGPGLGPDGPDGPEEK   | S320      | 0.01309783 | 0.4329872  | 0.39919401  |
| P08621 | SNRNP70   | YDERPGPSPLPHR                        | S226      | 0.40459334 | 1.19726027 | 0.7160132   |
| P08621 | SNRNP70   | GGGGGQDNGLEGLGNDNR                   | S410      | 0.62246416 | 0.806022   | 0.83642863  |
| Q13425 | SNTB2     | GLGPPSPAPP                           | S95       | 0.35468148 | 0.83303213 | 0.68723258  |
| Q13425 | SNTB2     | GPAGEAGASPPVRR                       | S110      | 0.38561026 | 1.1213894  | 0.71060254  |
| Q13573 | SNW1      | GPPSPAPVMHSPSR                       | S224,S232 | 0.26709736 | 0.75299172 | 0.63484011  |
| Q9UMY4 | SNX12     | RYSDFEWLK                            | S73       | 0.13914496 | 1.47608276 | 0.54797298  |
| Q15036 | SNX17     | SPPLLESPDATR                         | S421      | 0.00485863 | 0.58697593 | 0.31681062  |
| Q15036 | SNX17     | SPPLLESPDATR                         | S415      | 0.15533696 | 0.74871263 | 0.55688781  |
| Q9Y343 | SNX24     | AESCGSFDTESEESSK                     | S116      | 0.61527384 | 1.08920696 | 0.83347439  |
| Q9Y5X1 | SNX9      | SGNWESEGWGAQPEGAGAQR                 | S116      | 0.93179152 | 0.96598759 | 0.97583851  |

|        |         |                                   |                |            |            |            |
|--------|---------|-----------------------------------|----------------|------------|------------|------------|
| Q9Y4B5 | SOGA2   | SAEPRPELPGQETGTNSR                | S1808          | 0.02193133 | 0.68194509 | 0.41830815 |
| Q9Y4B5 | SOGA2   | SRSAEPRPELPGQETGTNSR              | S1791          | 0.09764842 | 1.34365375 | 0.52139713 |
| Q9Y4B5 | SOGA2   | EGPVGGESDSEEMFEK                  | S776           | 0.19082013 | 0.65932702 | 0.57584649 |
| Q9Y4B5 | SOGA2   | GRSPSPIGVSEMCR                    | S1812,S1814    | 0.23565499 | 0.77795031 | 0.6080317  |
| Q9Y4B5 | SOGA2   | SRSAEPRPELPGQETGTNSR              | T1804,S1791    | 0.30849375 | 0.80429275 | 0.66139614 |
| Q9Y4B5 | SOGA2   | SLYGDVDSPLPTGEAGPPSTR             | S549           | 0.38925615 | 1.2271297  | 0.71060254 |
| Q9Y4B5 | SOGA2   | EDVTPPLSPDDLK                     | T1417,S1421    | 0.72488918 | 0.92480996 | 0.89288925 |
| Q9Y4B5 | SOGA2   | REGVPVGGESDSEEMFEK                | S776           | 0.98801071 | 1.00259403 | 0.99494412 |
| P18583 | SON     | SAASPVVSSMPER                     | S1769          | 0.09843303 | 0.76300781 | 0.5228915  |
| P18583 | SON     | ESDQTLAALLSPK                     | S1697          | 0.18449664 | 0.8023416  | 0.57356637 |
| P18583 | SON     | SHDDGNIDLESDFLK                   | S152           | 0.27029755 | 0.86041816 | 0.63502787 |
| P18583 | SON     | EMEHNTVCAAGTSPVGEIGEEK            | S1556          | 0.51381203 | 0.84534606 | 0.77359824 |
| P18583 | SON     | SHDDGNIDLESDFLK                   | S154           | 0.60325296 | 1.04969657 | 0.82778596 |
| O60504 | SORBS3  | LCDDGQPLTSPR                      | S530           | 0.19766418 | 0.88936627 | 0.58169594 |
| Q07889 | SOS1    | SASVSSISLTK                       | S1134          | 0.19954543 | 0.63609885 | 0.58169594 |
| Q53LP3 | SOWAHC  | DLVMGSSPQLK                       | S213           | 0.32842878 | 0.78989164 | 0.67305029 |
| P23497 | SP100   | LPLQESSEEEERER                    | S157           | 0.17645417 | 1.31996792 | 0.56898248 |
| P23497 | SP100   | LSTFRESFK                         | S394           | 0.62173701 | 0.91617196 | 0.83613383 |
| Q9HB58 | SP110   | DNSPEPNDPEEPQVSSTPSDK             | S256           | 0.37887652 | 0.81792319 | 0.70608805 |
| Q9HB58 | SP110   | VTQGAASPGHGQIEK                   | S380           | 0.42645455 | 1.19161358 | 0.72966058 |
| Q02446 | SP4     | ENNVSQPASSSSSSSSNNGSASPTK         | S136           | 0.01984522 | 0.74100549 | 0.41830815 |
| O75391 | SPAG7   | QEEEAQQGPPVVSPASDYK               | S158           | 0.19699067 | 0.77581003 | 0.58169594 |
| O60271 | SPAG9   | LHQLSGDQLESTASHR                  | S185           | 0.23029261 | 0.71069507 | 0.6080317  |
| Q86XZ4 | SPATS2  | NSSWYSSGSR                        | S480           | 0.84208085 | 1.03698286 | 0.94313056 |
| Q5M775 | SPECC1  | SVSSPTSSNTPTPK                    | S134           | 0.31617035 | 1.12107925 | 0.66476843 |
| Q69YQ0 | SPECC1L | AQLGINEDHSEGEK                    | S220           | 0.1435912  | 1.29529476 | 0.55316341 |
| Q69YQ0 | SPECC1L | KGSSGNASEVSVACLTER                | S385           | 0.36551245 | 0.71863255 | 0.6962527  |
| Q69YQ0 | SPECC1L | GSSGNASEVSVACLTER                 | S384           | 0.40113239 | 0.87702482 | 0.7160132  |
| Q69YQ0 | SPECC1L | KGSSGNASEVSVACLTER                | S384           | 0.81488779 | 0.93557745 | 0.92952506 |
| Q96T58 | SPEN    | RPQSPGASPSQAR                     | S736,S740      | 0.17047204 | 0.78295606 | 0.56526141 |
| Q96T58 | SPEN    | HGSFHEDPIGSPR                     | S1268          | 0.4527245  | 0.79097225 | 0.73811209 |
| Q96T58 | SPEN    | SLVHEVGKPPQDVTDSPPSK              | S1222          | 0.54942765 | 0.90532959 | 0.79519958 |
| Q96T58 | SPEN    | EDVSASGSPPEATQLAK                 | S2159          | 0.6638139  | 1.05625165 | 0.85711256 |
| Q96T58 | SPEN    | HGSFHEDPIGSPR                     | S1278          | 0.81202416 | 1.030412   | 0.92840735 |
| P10451 | SPP1    | ANDESNEHSDVIDSQELSK               | S254           | 0.01084425 | 1.72757869 | 0.37969115 |
| P10451 | SPP1    | ISHELDSASSEVN                     | S310           | 0.02658557 | 1.53796296 | 0.41830815 |
| P10451 | SPP1    | QNLLAPQNAVSSEETNDFK               | S63            | 0.22400704 | 1.87703638 | 0.6080317  |
| Q13813 | SPTAN1  | SLQQLAER                          | S1217          | 0.22418487 | 0.70569304 | 0.6080317  |
| Q01082 | SPTBN1  | ESSPIPSPTSDR                      | S2165,S2169    | 0.45436485 | 0.88811881 | 0.73882557 |
| Q01082 | SPTBN1  | GEQVSNGLPAEQGSPR                  | S2138          | 0.46213411 | 0.88211616 | 0.74438607 |
| Q01082 | SPTBN1  | ESSPIPSPTSDR                      | S2165,S2169    | 0.97105458 | 1.00391313 | 0.98944141 |
| Q13501 | SQSTM1  | IALESEGRPEEQMESDNCSGGDDWTHLSSK    | S342           | 0.00805921 | 2.78477531 | 0.35749468 |
| Q13501 | SQSTM1  | EVDPSTGELQSLQMPSEGPSSLDPSQEGPTGLK | S365           | 0.01477218 | 2.39847716 | 0.41362115 |
| Q13501 | SQSTM1  | LTPVSPSSSTEEK                     | T269,S276      | 0.02260708 | 0.65962828 | 0.41830815 |
| Q13501 | SQSTM1  | EVDPSTGELQSLQMPSEGPSSLDPSQEGPTGLK | S366           | 0.05676717 | 1.91761855 | 0.47702638 |
| Q13501 | SQSTM1  | SRLTPVSPSSSTEEK                   | T269,S272      | 0.08244334 | 0.5292887  | 0.50397847 |
| Q13501 | SQSTM1  | LTPVSPSSSTEEK                     | T269           | 0.16955489 | 0.8125404  | 0.56526141 |
| Q13501 | SQSTM1  | EVDPSTGELQSLQMPSEGPSSLDPSQEGPTGLK | S355,S361      | 0.18099202 | 2.03999936 | 0.57144392 |
| Q13501 | SQSTM1  | CSVCPDYDLCVCEGK                   | S152           | 0.19566592 | 1.26556523 | 0.58092537 |
| Q13501 | SQSTM1  | IALESEGRPEEQMESDNCSGGDDWTHLSSK    | S328           | 0.23059704 | 1.37535613 | 0.6080317  |
| Q13501 | SQSTM1  | LTPVSPSSSTEEK                     | T269,S272      | 0.32335136 | 0.65941038 | 0.5705262  |
| Q13501 | SQSTM1  | IALESEGRPEEQMESDNCSGGDDWTHLSSK    | S332           | 0.75830232 | 1.06973924 | 0.90833103 |
| Q13501 | SQSTM1  | RFSFCCSPEPEAAEAAAGPPCR            | S24            | 0.80855848 | 1.10104012 | 0.92670839 |
| Q13501 | SQSTM1  | IALESEGRPEEQMESDNCSGGDDWTHLSSK    | S328,S332      | 0.82440362 | 1.17216069 | 0.93550117 |
| Q13501 | SQSTM1  | SRLTPVSPSSSTEEK                   | T269           | 0.90302577 | 1.02729754 | 0.96464663 |
| Q13501 | SQSTM1  | LTPVSPSSSTEEK                     | S272           | 0.98417787 | 1.00250125 | 0.99457412 |
| Q8NEF9 | SFRBP1  | EYFDSTEEFR                        | T265           | 0.13106977 | 0.87775932 | 0.54353881 |
| Q8NEF9 | SFRBP1  | TRSLDFPQNEPQJK                    | S367           | 0.50475758 | 1.29653966 | 0.76766855 |
| Q96SB4 | SRPK1   | GSAPHSESDLPEQEEILGSDDEQEDPNDYCK   | S51            | 0.57577041 | 1.12338729 | 0.81432655 |
| P78362 | SRPK2   | TVSASSTGDLPK                      | T498,S494      | 0.53182796 | 0.75752822 | 0.78441777 |
| P78362 | SRPK2   | TVSASSTGDLPK                      | T498           | 0.98216768 | 0.99749417 | 0.99355276 |
| Q8IYB3 | SRRM1   | KETESEAEDNLDDLEK                  | T872           | 0.23959779 | 1.40792455 | 0.61124058 |
| Q8IYB3 | SRRM1   | EKTPPELPEPSVK                     | T220           | 0.32225743 | 1.23677843 | 0.67020204 |
| Q8IYB3 | SRRM1   | RYSPIQR                           | S597           | 0.36156663 | 1.18822674 | 0.692567   |
| Q8IYB3 | SRRM1   | RQSPSPSTRPIR                      | T718,S713      | 0.43195199 | 1.14666667 | 0.73066928 |
| Q8IYB3 | SRRM1   | KETESEAEDNLDDLEK                  | T872,S874      | 0.43590595 | 1.28740671 | 0.73335873 |
| Q8IYB3 | SRRM1   | KPPAPPSPVQSQSPSTNWSPAVPVK         | S769,S773,S781 | 0.5248318  | 1.46336399 | 0.7781237  |
| Q8IYB3 | SRRM1   | HRSPSPATPPPK                      | T406,S402      | 0.55071724 | 0.94641661 | 0.79625112 |
| Q8IYB3 | SRRM1   | ETESEAEDNLDDLEK                   | S874           | 0.55382521 | 1.11459667 | 0.79795367 |
| Q8IYB3 | SRRM1   | SPSPAPPPR                         | S560,S562      | 0.57681156 | 0.91879631 | 0.81432655 |
| Q8IYB3 | SRRM1   | AASPSQSVR                         | S738,S740      | 0.61569558 | 0.92093541 | 0.83347439 |
| Q8IYB3 | SRRM1   | RYSPPPPK                          | S605,S607      | 0.7066883  | 1.05156538 | 0.88054794 |
| Q8IYB3 | SRRM1   | KETESEAEDNLDDLEK                  | S874           | 0.72594728 | 1.08748115 | 0.89291515 |
| Q8IYB3 | SRRM1   | VPKPEIPEKESPEK                    | S260           | 0.7517405  | 1.11185223 | 0.90658581 |
| Q8IYB3 | SRRM1   | RQSPSPSTRPIR                      | S713,S715      | 0.80665043 | 1.03255426 | 0.92607772 |
| Q8IYB3 | SRRM1   | KPPAPPSPVQSQSPSTNWSPAVPVK         | T778,S769      | 0.84706985 | 1.12129826 | 0.9453218  |
| Q8IYB3 | SRRM1   | APQTSSSPPVVR                      | S694,S696      | 0.86076455 | 1.03979319 | 0.95107454 |
| Q8IYB3 | SRRM1   | VELSEEDK                          | S463           | 0.86561071 | 1.05113098 | 0.95305732 |
| Q8IYB3 | SRRM1   | APQTSSSPPVVR                      | S696           | 0.8726936  | 1.01199041 | 0.95542841 |
| Q8IYB3 | SRRM1   | RLSPASAPPR                        | S389,S393      | 0.87677742 | 0.98187932 | 0.95569655 |
| Q8IYB3 | SRRM1   | TPLEPEPSVK                        | T220           | 0.9491793  | 0.99577346 | 0.98215506 |

|        |        |                             |                   |            |            |            |
|--------|--------|-----------------------------|-------------------|------------|------------|------------|
| Q9UQ35 | SRRM2  | LPQSSSESSPPSPQPTK           | S424              | 0.09301868 | 0.75158428 | 0.51597098 |
| Q9UQ35 | SRRM2  | SRTPPSAPSQSR                | S2407             | 0.11250156 | 1.81987057 | 0.53343618 |
| Q9UQ35 | SRRM2  | SRTPPSAPSQSR                | T2409             | 0.16040883 | 1.8839081  | 0.55717183 |
| Q9UQ35 | SRRM2  | SPGMLEPLGSSR                | S2132             | 0.17683963 | 0.69514988 | 0.56898248 |
| Q9UQ35 | SRRM2  | SVSPCSNVESR                 | S954              | 0.21518252 | 1.14085342 | 0.60251104 |
| Q9UQ35 | SRRM2  | SSTPPGESYFVGSVLQK           | T1043             | 0.21727796 | 1.90840391 | 0.60411977 |
| Q9UQ35 | SRRM2  | SLSGSSPCPK                  | S780              | 0.25178842 | 1.22731502 | 0.61962985 |
| Q9UQ35 | SRRM2  | SGSSQELDVKPSASPQER          | S1552             | 0.2591872  | 1.1503543  | 0.62685443 |
| Q9UQ35 | SRRM2  | SSSPVTELASR                 | S1101,S1102       | 0.26729113 | 0.69505503 | 0.63486252 |
| Q9UQ35 | SRRM2  | SSGHSSSESPDAVEK             | S1382             | 0.27380718 | 0.80762346 | 0.63888342 |
| Q9UQ35 | SRRM2  | SLSYSPVER                   | S2692             | 0.2790882  | 0.79563565 | 0.6455595  |
| Q9UQ35 | SRRM2  | HGGSPQLATTPLSQEPVNPPEASPTR  | T400,S377         | 0.3063291  | 0.77826564 | 0.66139614 |
| Q9UQ35 | SRRM2  | SRTSPAPWK                   | S1857             | 0.3298804  | 1.14924347 | 0.67434984 |
| Q9UQ35 | SRRM2  | SSGHSSSESPDAVEK             | S1382,S1387       | 0.3613854  | 0.81327261 | 0.692567   |
| Q9UQ35 | SRRM2  | SGSSQELDVKPSASPQER          | S1542             | 0.37301783 | 0.90920519 | 0.7200733  |
| Q9UQ35 | SRRM2  | QGSITSPOANEQSVTPQRR         | T866,S857         | 0.38750599 | 0.85583624 | 0.71060254 |
| Q9UQ35 | SRRM2  | HASSSPSPKAPAPGSHR           | S435,S440         | 0.39762089 | 2.10059037 | 0.7160132  |
| Q9UQ35 | SRRM2  | ELNSNPLRENSFGSPLEFR         | S1320,S1329       | 0.43781908 | 1.2507772  | 0.73338954 |
| Q9UQ35 | SRRM2  | LPQSSSESSPPSPQPTK           | S421,S424         | 0.44413234 | 0.82697083 | 0.73811209 |
| Q9UQ35 | SRRM2  | SSGHSSSESPDAVEK             | S1383,S1387       | 0.46793274 | 0.85288066 | 0.74813177 |
| Q9UQ35 | SRRM2  | TPPVALNLSR                  | T2104             | 0.47130722 | 0.78840125 | 0.74973768 |
| Q9UQ35 | SRRM2  | ELNSNPLRENSFGSPLEFR         | S1320             | 0.48739759 | 1.57835265 | 0.75953527 |
| Q9UQ35 | SRRM2  | AIISPR                      | S924              | 0.50419152 | 1.12365205 | 0.76766855 |
| Q9UQ35 | SRRM2  | AQTPPGSPSLSGSK              | T1003             | 0.51614393 | 1.1232687  | 0.77421589 |
| Q9UQ35 | SRRM2  | SSSPVTELASR                 | S1101,S1103       | 0.5343994  | 0.86662582 | 0.87605027 |
| Q9UQ35 | SRRM2  | SRSVSPCSNVESR               | S952,S954         | 0.58248766 | 0.90784411 | 0.81845981 |
| Q9UQ35 | SRRM2  | SLSGSSPCPK                  | S778              | 0.59168778 | 1.19359784 | 0.82284423 |
| Q9UQ35 | SRRM2  | NHSGSRTPPVALNLSR            | T2104,S2100       | 0.60633393 | 1.12533099 | 0.82979346 |
| Q9UQ35 | SRRM2  | NHSGSRTPPVALNLSR            | T2104,S2102       | 0.60937231 | 0.91169978 | 0.83062316 |
| Q9UQ35 | SRRM2  | QGSITSPOANEQSVTPQRR         | T866              | 0.61638395 | 1.20351228 | 0.83347439 |
| Q9UQ35 | SRRM2  | ENFSGSPLEFR                 | S1329             | 0.61649945 | 0.86698565 | 0.83347439 |
| Q9UQ35 | SRRM2  | CRSPGMLEPLGSSR              | S2132             | 0.64503848 | 1.29502532 | 0.8485533  |
| Q9UQ35 | SRRM2  | THTTALAGRSPSPASGR           | S295,S297         | 0.65372076 | 0.93876543 | 0.85184045 |
| Q9UQ35 | SRRM2  | AGMSSNQSISSVLDVPRTPSR       | T1413,S1404       | 0.70862121 | 1.18931402 | 0.88199908 |
| Q9UQ35 | SRRM2  | SATRPSPSPERSTGPEPPAPTLLAER  | S351,S353,S357    | 0.73128671 | 1.16300955 | 0.89605782 |
| Q9UQ35 | SRRM2  | RGEGDAPFSEPGTTSTQRPSSPETATK | S323              | 0.73227324 | 1.04632283 | 0.89605782 |
| Q9UQ35 | SRRM2  | QSHSGSISPYPK                | S994              | 0.74054711 | 1.09657991 | 0.89994504 |
| Q9UQ35 | SRRM2  | ELNSNPLR                    | S1320             | 0.74772211 | 0.88452089 | 0.90350024 |
| Q9UQ35 | SRRM2  | GEFSASPMLK                  | S1124             | 0.74971041 | 1.057041   | 0.90469609 |
| Q9UQ35 | SRRM2  | NHSGSRTPPVALNLSR            | T2104,S2100,S2102 | 0.75310293 | 1.18984179 | 0.9072006  |
| Q9UQ35 | SRRM2  | QGSITSPOANEQSVTPQRR         | S857              | 0.7627734  | 0.9286429  | 0.91002821 |
| Q9UQ35 | SRRM2  | SSGHSSSESPDAVEK             | S1387             | 0.77078505 | 1.07905803 | 0.91329931 |
| Q9UQ35 | SRRM2  | TSPPLDR                     | S2398             | 0.80169763 | 0.9619182  | 0.92455018 |
| Q9UQ35 | SRRM2  | RGEGDAPFSEPGTTSTQRPSSPETATK | S322,S323         | 0.81894634 | 1.08141077 | 0.93238056 |
| Q9UQ35 | SRRM2  | SRSQSSQELDVKPSASPQER        | S1542             | 0.82103074 | 1.05862565 | 0.93321117 |
| Q9UQ35 | SRRM2  | QGSITSPOANEQSVTPQRR         | T866,S857         | 0.83823244 | 1.05699139 | 0.94157617 |
| Q9UQ35 | SRRM2  | SSSPVTELASRSPIR             | S1103,S1112       | 0.89141373 | 0.96546322 | 0.95998402 |
| Q9UQ35 | SRRM2  | QGSITSPOANEQSVTPQRR         | T866              | 0.90240535 | 1.0291439  | 0.96458226 |
| Q9UQ35 | SRRM2  | HGGSPQLATTPLSQEPVNPPEASPTR  | T383,T400,S377    | 0.90272239 | 1.0264658  | 0.96462175 |
| Q9UQ35 | SRRM2  | GEGDAPFSEPGTTSTQRPSSPETATK  | S322              | 0.91999044 | 0.98041667 | 0.9710227  |
| Q9UQ35 | SRRM2  | EQNSALPTSQDEELMEVVEK        | T1231             | 0.93229168 | 1.00653605 | 0.97583851 |
| Q9UQ35 | SRRM2  | RGEGDAPFSEPGTTSTQRPSSPETATK | T328              | 0.95146751 | 1.00927879 | 0.98285966 |
| Q9UQ35 | SRRM2  | SCFESSDPDELK                | S876              | 0.96128433 | 0.99331307 | 0.98502328 |
| Q9UQ35 | SRRM2  | GEGDAPFSEPGTTSTQRPSSPETATK  | S322,S323         | 0.97213543 | 1.01146467 | 0.98966465 |
| Q9BXP5 | SRR1   | ERFSPRR                     | S67               | 0.84402569 | 1.07825975 | 0.94383208 |
| Q07955 | SRSF1  | VDGPRSPSYGR                 | S199              | 0.104867   | 1.56900041 | 0.52494467 |
| 075494 | SRSF10 | SRSFDYNYR                   | S133              | 0.58612439 | 1.1430007  | 0.8200322  |
| Q05519 | SRSF11 | DYDEEQGVYDSEK               | S434              | 0.49486295 | 1.13285213 | 0.76357885 |
| Q01130 | SRSF2  | VDNLTYRTSPDTRL              | T25               | 0.22626516 | 1.72970275 | 0.6080317  |
| Q13247 | SRSF6  | LIVENLSSR                   | S119              | 0.34368583 | 1.34022508 | 0.67909008 |
| Q13247 | SRSF6  | SNSPLPVPSK                  | S303              | 0.75955841 | 1.06355858 | 0.90862076 |
| Q13242 | SRSF9  | GSPHYFSPFRPY                | S211              | 0.47115569 | 1.40103734 | 0.74973768 |
| Q13242 | SRSF9  | GSPHYFSPFRPY                | Y214,S216         | 0.92260188 | 1.01175433 | 0.97154665 |
| Q13242 | SRSF9  | GSPHYFSPFRPY                | S211,S216         | 0.99775059 | 1.00047259 | 0.99864937 |
| Q9BYN0 | SRXN1  | GAPEGPGSGGAQGGSIHSGR        | S32               | 0.14237392 | 0.56883318 | 0.55155881 |
| P05455 | SSB    | FASDDEHDEHDENGATGPVK        | S366              | 0.32963543 | 1.15545326 | 0.67434984 |
| P28290 | SSFA2  | TPLGASLDEQSSSTLK            | S92               | 0.18868951 | 1.33334323 | 0.57474321 |
| P28290 | SSFA2  | SLASIEAK                    | S668              | 0.20820207 | 1.23167143 | 0.59226675 |
| P28290 | SSFA2  | MPSPPFR                     | S1040             | 0.23090023 | 0.85508206 | 0.6080317  |
| Q8WYL5 | SSH1   | KLEFGSPK                    | S576              | 0.20679325 | 0.74743609 | 0.59145167 |
| Q8WYL5 | SSH1   | SPPPFYR                     | S897              | 0.57590087 | 0.84300699 | 0.81432655 |
| Q8TE77 | SSH3   | RQSFVLR                     | S37               | 0.55274228 | 1.28483207 | 0.79750499 |
| Q8TE77 | SSH3   | APSEELHGDQTFGQGSQSPQK       | S87               | 0.6465237  | 0.95939566 | 0.84855908 |
| Q08945 | SSRP1  | QLSEFSK                     | S659              | 0.03040916 | 0.46013765 | 0.43445387 |
| Q08945 | SSRP1  | EGMNPSPSYDEYADSDQHDAYLER    | S444              | 0.77166881 | 1.10851419 | 0.91329931 |
| P50502 | ST13   | ADEPSSEESDLEIDK             | S79               | 0.00239128 | 0.58417508 | 0.27314524 |
| P50502 | ST13   | ADEPSSEESDLEIDK             | S76,S79           | 0.6684947  | 0.81542553 | 0.85938624 |
| Q95793 | STAU1  | VTFEPGSDENGTSNK             | S390              | 0.04565125 | 0.66428125 | 0.45625798 |
| Q9NUL3 | STAU2  | GSSPTPPCSPVQPSK             | T488              | 0.05810473 | 0.75996777 | 0.47702638 |
| Q13586 | STIM1  | AVAEDNNGSIGEETDSSPGRK       | S668              | 0.14755034 | 0.48051624 | 0.53532644 |
| Q13586 | STIM1  | SHSPSPDPDTPSPVGDOR          | S618              | 0.1711098  | 0.75399084 | 0.56554907 |

|        |          |                                |             |            |            |            |
|--------|----------|--------------------------------|-------------|------------|------------|------------|
| O94804 | STK10    | LSEEAECNPMPSPK                 | T952        | 0.13070281 | 0.75724977 | 0.54344847 |
| O94804 | STK10    | ASQSRPNSSALETLGGEK             | S454,S448   | 0.55447242 | 0.81966599 | 0.79832902 |
| O94804 | STK10    | QVAEQGGDLSPAANR                | S438        | 0.65547954 | 1.04986318 | 0.85263945 |
| Q8N1F8 | STK11P   | RASISEPSTDPEPR                 | S398        | 0.21811108 | 0.76579488 | 0.60411977 |
| Q13188 | STK3     | ELEEEEEENDEDELDSHTMVK          | S316        | 0.88007474 | 0.96326562 | 0.95724213 |
| Q86UX6 | STK32C   | RGSSAAASPGSPPPGR               | S18,S10     | 0.2646288  | 0.75297525 | 0.63400981 |
| Q9UEW8 | STK39    | TEDGDWEWSDDEMDEK               | S385        | 0.46289372 | 1.29573468 | 0.74438607 |
| Q13043 | STK4     | EVDQDDEENSEDEMDSGTMVR          | S320        | 0.62881503 | 0.86186813 | 0.83899389 |
| P16949 | STMN1    | ESVPEFPLSPPK                   | S38         | 0.2183341  | 0.71351156 | 0.60411977 |
| Q5VSL9 | STRIP1   | KDSEGYSESPDLEFEYADTDK          | Y62         | 0.01144717 | 1.28616601 | 0.38671818 |
| Q5VSL9 | STRIP1   | KDSEGYSESPDLEFEYADTDK          | S59         | 0.88445632 | 0.94058737 | 0.95812202 |
| Q13033 | STRN3    | NLEQILNGGESPK                  | S229        | 0.46577178 | 0.8560953  | 0.74679609 |
| Q8TCJ2 | STT3B    | RENPPVEDSSDEDDK                | S499        | 0.37216204 | 1.20903868 | 0.7012243  |
| Q8TCJ2 | STT3B    | RENPPVEDSSDEDDK                | S498        | 0.52082138 | 1.167603   | 0.77620221 |
| Q8TCJ2 | STT3B    | ENPPVEDSSDEDDK                 | S498        | 0.5456062  | 1.0565932  | 0.79285559 |
| Q12846 | STX4     | EEADENYVSNTR                   | S117        | 0.81508876 | 0.97129277 | 0.92952506 |
| Q9H7L9 | SUDS3    | RPASPPSEHLPATPAESPAQR          | S234,S237   | 0.25961097 | 0.80890973 | 0.62708943 |
| Q8IWZ8 | SUGP1    | AVQQHQHGYDSDDEEVDSELGTWEHQLR   | S485        | 0.38935534 | 2.37228752 | 0.71060254 |
| Q8IX01 | SUGP2    | EAELESPEVMPEEEDDEDEGGEEAPGGAGK | S887        | 0.29893041 | 1.19706787 | 0.65817287 |
| Q8IX01 | SUGP2    | MSFDIHK                        | S315        | 0.32320163 | 0.54396237 | 0.6705262  |
| O00204 | SULT2B1  | EPRPNSSPSPGQASETPHPRPS         | S348        | 0.86932252 | 0.94869301 | 0.95442216 |
| Q9UH99 | SUN2     | YSQGGDDGSSSSGSSVAGSQSTLFK      | S12         | 0.11543768 | 0.49186351 | 0.53343618 |
| Q8NEM7 | SUPT20H  | ADEESDSQMSPHSSSTDDHSNWFIIGSK   | S381        | 0.03396874 | 1.42952836 | 0.43874459 |
| Q7KZ85 | SUPT6H   | KMSDDEDDDEEEYEGK               | S125        | 0.31481908 | 0.76475396 | 0.66395403 |
| O94864 | SUPT7L   | TEESEPLPCGSPPLDPLLPLDCK        | S108        | 0.30297256 | 1.22270364 | 0.65956859 |
| Q15527 | SURF2    | DLGSTEDGGDGTDFLTKDEK           | T195        | 0.1560361  | 1.34872953 | 0.55688781 |
| O75683 | SURF6    | ELSPAALK                       | S138        | 0.96622978 | 0.99425947 | 0.98758099 |
| Q15022 | SUZ12    | ASMSEFLESDGEVEQQR              | S546        | 0.1810024  | 0.75101618 | 0.57144392 |
| O95425 | SVIL     | SFDEQNVPK                      | S707        | 0.01453174 | 1.47850467 | 0.41362115 |
| O95425 | SVIL     | QAHDLSPAAESSTFSFSGR            | S221        | 0.31865635 | 1.55923356 | 0.66755017 |
| O95425 | SVIL     | CTSHSETPTVDDEEK                | T672        | 0.40047759 | 0.8928933  | 0.7160132  |
| O95425 | SVIL     | DSSFTEVPRSPK                   | S245        | 0.45169678 | 1.09476031 | 0.73811209 |
| Q92797 | SYMPK    | TPSPAEDAREPEAK                 | S1259       | 0.48539872 | 1.18007663 | 0.75953527 |
| Q92797 | SYMPK    | EERSPQTLAPVGEDAMK              | S1243       | 0.95449719 | 0.9866822  | 0.98367301 |
| Q8NF91 | SYNE1    | LPLPDDHDLSDR                   | S8223       | 0.29965712 | 0.51603855 | 0.65817287 |
| Q8NF91 | SYNE1    | ALPSEDEEGQDDK                  | S8305       | 0.29994256 | 0.91220875 | 0.65817287 |
| Q8NF91 | SYNE1    | TPTGPELDTSYK                   | T8360       | 0.53744695 | 0.84459875 | 0.78705986 |
| Q8NF91 | SYNE1    | SKTPTGPELDTSYK                 | T8360       | 0.99776738 | 1.00097946 | 0.99864937 |
| O15061 | SYNM     | QRSPAGSPDEEGGAEAPAAGIR         | S1044       | 0.09587886 | 0.77857656 | 0.51670111 |
| O15061 | SYNM     | QRSPAGSPDEEGGAEAPAAGIR         | S1044,S1049 | 0.18785746 | 0.68263811 | 0.57474321 |
| O15061 | SYNM     | SPAPGSPDEEGGAEAPAAGIR          | S1049       | 0.63684477 | 0.93694692 | 0.8428508  |
| Q8N3V7 | SYNPO    | DRASPAAAEEVPEWASCLK            | S685        | 0.12757781 | 1.32502618 | 0.5403576  |
| Q8N3V7 | SYNPO    | SPPSYVLYPSSDPK                 | S580        | 0.44266802 | 0.84506297 | 0.73685291 |
| Q9UMZ7 | SYNRG    | ETSFSGSENITMISLTK              | S935        | 0.09111964 | 0.51371817 | 0.51141856 |
| Q9UMZ2 | SYNRG    | QLSLEGLSGVEDLK                 | S752        | 0.64670847 | 1.07601264 | 0.84855908 |
| O75410 | TACC1    | ETPGTLSSDNTDSGVELGEESSRSLPK    | S316        | 0.37077567 | 0.76762553 | 0.70105255 |
| O75410 | TACC1    | ASYHFSPEELDENTSPLLGDAR         | S276        | 0.80663315 | 1.11232833 | 0.92607772 |
| O95359 | TACC2    | FSSPTEELDR                     | S2512       | 0.13797916 | 1.28007299 | 0.54797298 |
| O95359 | TACC2    | LDNTPASPPRSPAEPNDIPIAK         | S2317,S2321 | 0.24068608 | 0.76749799 | 0.61232743 |
| O95359 | TACC2    | MQESPKLPQQSYNFDPTCDESVDPPK     | S2359       | 0.58295062 | 1.29498196 | 0.81845981 |
| O95359 | TACC2    | MSESPTPCSGSFEETEALVNNTAAK      | S2569       | 0.69749973 | 0.92767147 | 0.87447728 |
| Q6P1X5 | TAF2     | EPFTFSSPASGR                   | S1185       | 0.67806455 | 0.90577533 | 0.8627275  |
| Q15545 | TAF7     | LNESDEQHQENEGTNQLVMGIQK        | S264        | 0.3361939  | 0.82964729 | 0.67736506 |
| Q15545 | TAF7     | EAENQGLDISSPGMSGHR             | S201        | 0.60136268 | 0.77104812 | 0.82678366 |
| P37802 | TAGLN2   | GASQAQMTGYGMGR                 | S185        | 0.19096941 | 0.35660483 | 0.57584619 |
| P37802 | TAGLN2   | NFSDNQLQEGK                    | S163        | 0.6336329  | 0.90384227 | 0.84223531 |
| Q9HCD6 | TANC2    | DCSYGAVTSPTSTLESR              | S169        | 0.1704401  | 0.72931881 | 0.56526141 |
| Q7L7X3 | TAOK1    | ASDPQSPQVSR                    | S421        | 0.52148887 | 1.09947644 | 0.77620221 |
| Q9H2K8 | TAOK3    | NGPLNESQEDEEDSEHGTSLNR         | S324        | 0.3500651  | 1.21291314 | 0.68418829 |
| Q9H2K8 | TAOK3    | NGPLNESQEDEEDSEHGTSLNR         | S331        | 0.79707902 | 0.95582554 | 0.92373279 |
| O14907 | TAX1BP3  | VSEGGPAEIAGLQIQDK              | S61         | 0.13067382 | 0.60637424 | 0.54344847 |
| Q4KMP7 | TBC1D10B | AAGGAPSPPPVPR                  | S678        | 0.6192513  | 0.89318996 | 0.83504364 |
| Q4KMP7 | TBC1D10B | HGAPAAPSPPPR                   | S22         | 0.8753494  | 1.07229376 | 0.95556965 |
| Q8TC07 | TBC1D15  | NDSPTQIPVSSDVCR                | S675        | 0.03275163 | 0.63557952 | 0.43874459 |
| Q8TC07 | TBC1D15  | KDSSVVWVWTQAPK                 | S70         | 0.6255637  | 1.13369756 | 0.8387339  |
| Q9HA65 | TBC1D17  | APPPTPPSTDAPQPSSLEILPEEEDGADS  | T620        | 0.17840521 | 0.69286096 | 0.56898248 |
| O60343 | TBC1D4   | LGSVDSFER                      | S588        | 0.35890775 | 0.84566428 | 0.69093253 |
| Q92609 | TBC1D5   | RTSSTLDESEGTFSYR               | S43         | 0.25869638 | 0.75925926 | 0.62930151 |
| Q92609 | TBC1D5   | TSSTLDESEGTFSYR                | S43         | 0.42815143 | 0.72063905 | 0.72966058 |
| Q92609 | TBC1D5   | EFTGSPSSATK                    | S554        | 0.52247386 | 0.92434608 | 0.77694299 |
| Q92609 | TBC1D5   | SESMPLVQLNK                    | S522        | 0.88511352 | 0.94871884 | 0.95812202 |
| Q66K14 | TBC1D9B  | KASVVDPTSESSPAPQEGSEQPASPPLSSR | S411,S439   | 0.02403453 | 0.39708801 | 0.41830815 |
| Q66K14 | TBC1D9B  | ASVVDPTSESSPAPQEGSEQPASPPLSSR  | S435        | 0.95928873 | 0.98395608 | 0.98502328 |
| P23193 | TCEA1    | EPAITSQNSPEAR                  | S100        | 0.0478413  | 1.19491525 | 0.45625798 |
| P23193 | TCEA1    | KEPAITSQNSPEAR                 | S100        | 0.06840717 | 1.2643752  | 0.49083932 |
| Q96E15 | TCEAL4   | EGKPEIEGKPESEGEPEGSETR         | S102        | 0.86086155 | 0.96467907 | 0.95107454 |
| Q9UGU0 | TCF20    | NCPAVLTLSPAK                   | S1335       | 0.05168701 | 0.47194776 | 0.45878883 |
| Q9UGU0 | TCF20    | ENDTVTISPK                     | S1522       | 0.38896216 | 0.85469105 | 0.71060254 |
| Q13428 | TCOF1    | TSQVGAASAPAKESPR               | S375        | 0.05129275 | 0.7609681  | 0.45652016 |
| Q13428 | TCOF1    | TSQVGAASAPAKESPR               | S381        | 0.14196154 | 0.77987447 | 0.55060716 |
| Q13428 | TCOF1    | LGAGEGGEASVSPK                 | S1378       | 0.39706533 | 0.77303884 | 0.7160132  |



|        |          |                                     |           |            |            |            |
|--------|----------|-------------------------------------|-----------|------------|------------|------------|
| Q13428 | TCOF1    | LDSSPSVSTLAAK                       | S1228     | 0.58031059 | 0.94225095 | 0.8170849  |
| Q13428 | TCOF1    | VGPATPSAQVVK                        | T533      | 0.75843434 | 0.92319394 | 0.90833103 |
| Q13428 | TCOF1    | TQPSVSGVDSAVGTLPATSPQSTSVQAK        | S1111     | 0.79629675 | 1.11873355 | 0.92373279 |
| P17987 | TCP1     | HGSYEDAVHSGALND                     | S551      | 0.07633754 | 0.81208585 | 0.50397847 |
| P17987 | TCP1     | HGSYEDAVHSGALND                     | S544      | 0.08284221 | 1.30421753 | 0.50397847 |
| Q9NVB0 | TERF2IP  | YLLGDAPVSPSSQK                      | S203      | 0.41925668 | 0.89281314 | 0.72449573 |
| Q8IWB9 | TEX2     | SLSTEVEPK                           | S196      | 0.6925094  | 1.1152927  | 0.8717114  |
| Q01664 | TFAP4    | DEGIGSPDIWEDEK                      | S139      | 0.01904007 | 0.70971347 | 0.41830815 |
| Q01664 | TFAP4    | FIQELSGSSPK                         | S124      | 0.05906085 | 0.55878523 | 0.47702638 |
| Q14186 | TFDP1    | VFIDQNLSPGK                         | S23       | 0.03351349 | 0.3991198  | 0.43874459 |
| Q14188 | TFDP2    | GFIDQNLSPK                          | S24       | 0.04364471 | 0.58076134 | 0.45441331 |
| Q9UBB9 | TFIP11   | EEATYGVWAERDSDDERPSFGGK             | S59       | 0.3995118  | 1.46756433 | 0.7160132  |
| Q9UBB9 | TFIP11   | TTQSMQDFPVVDSEEEAEEEFQK             | S210      | 0.4269314  | 1.13384321 | 0.72966058 |
| POC126 | TFPT     | RTPAPPEPGSPAPGEGPSGR                | S180      | 0.47124895 | 1.05606407 | 0.74973768 |
| O43294 | TGFB111  | ERPAELTPPPSYGHQPQTGSGESSGASGDK      | T33       | 0.9497689  | 1.02776546 | 0.98215506 |
| P37173 | TGFBR2   | LGSSLAR                             | S352      | 0.89032106 | 0.96470707 | 0.95998402 |
| O43493 | TGOLN2   | SSAEAQTPEDTPNK                      | S71       | 0.0046267  | 0.17397049 | 0.31681062 |
| O43493 | TGOLN2   | TESGEETDLISPPQEEVK                  | T296      | 0.01811502 | 0.37334565 | 0.41830815 |
| Q96RS0 | TGS1     | EYEEDDILASDDPSSIEQYENTR             | S154      | 0.40499957 | 1.20527091 | 0.7160132  |
| Q8NI27 | THOC2    | IDTHPSPSHSSTVK                      | S1419     | 0.15696315 | 1.31367464 | 0.56588781 |
| Q8NI27 | THOC2    | SESPCESPYNEK                        | S1516     | 0.25362397 | 1.19120135 | 0.62213743 |
| Q8NI27 | THOC2    | IDTHPSPSHSSTVK                      | S1417     | 0.47546332 | 1.1701847  | 0.75249201 |
| Q9Y2W1 | THRAP3   | MDSFDDELARPSGLLAQER                 | S575      | 0.06568495 | 2.33542712 | 0.48649241 |
| Q9Y2W1 | THRAP3   | WAHDKFSGEEGIEEDDESSTENR             | S928      | 0.11485495 | 1.48158915 | 0.53343618 |
| Q9Y2W1 | THRAP3   | SPLQSVVVR                           | S253      | 0.14044134 | 0.80315135 | 0.54797298 |
| Q9Y2W1 | THRAP3   | FSGEEGIEEDESSTENR                   | S939      | 0.30054107 | 0.54418095 | 0.65817287 |
| Q9Y2W1 | THRAP3   | ASAVSELSPR                          | S243      | 0.33361714 | 1.15934066 | 0.67622969 |
| Q9Y2W1 | THRAP3   | SPPSTGSTYSSQK                       | S320      | 0.43659333 | 1.08678021 | 0.73338954 |
| Q9Y2W1 | THRAP3   | RIDISPSTFR                          | S682      | 0.5375043  | 1.50992629 | 0.78705986 |
| Q9Y2W1 | THRAP3   | FSGEEGIEEDESSTENR                   | S928,S939 | 0.5850595  | 0.90973312 | 0.8200322  |
| Q9Y2W1 | THRAP3   | FSGEEGIEEDESSTENR                   | S928      | 0.59485771 | 0.67393083 | 0.82338978 |
| Q9Y2W1 | THRAP3   | GSFSDTLGDLGDK                       | S379      | 0.63179889 | 1.08314732 | 0.84077101 |
| Q9Y2W1 | THRAP3   | WAHDKFSGEEGIEEDESSTENR              | S928,S939 | 0.67074882 | 1.04540799 | 0.86067769 |
| Q9Y2W1 | THRAP3   | FSGEEGIEEDESSTENR                   | S928      | 0.75258942 | 1.07365439 | 0.90689921 |
| Q9Y2W1 | THRAP3   | IDISPSTFR                           | S682      | 0.79987125 | 0.9364939  | 0.92455018 |
| Q9Y2W1 | THRAP3   | FSGEEGIEEDESSTENR                   | S939      | 0.97527055 | 1.00263158 | 0.98993501 |
| Q9NXG2 | THUMPD1  | DQQPSGSEGEDDDAEAAK                  | S86,S88   | 0.0441946  | 1.47630149 | 0.45441331 |
| Q9BV44 | THUMPD3  | DETDESKEETEPQVLK                    | S215      | 0.08338415 | 1.15186017 | 0.50397847 |
| Q7Z2Z1 | TICRR    | IECPSGELDQK                         | S1334     | 0.00088064 | 0.4454609  | 0.25274253 |
| Q7Z2Z1 | TICRR    | SIVECQPDASATPGVGTADSPAAPTDRDDQK     | S1413     | 0.0050594  | 0.49107372 | 0.31681062 |
| Q7Z2Z1 | TICRR    | SIAEVSQNLK                          | S865      | 0.03735528 | 0.45431251 | 0.44815912 |
| Q7Z2Z1 | TICRR    | LHPDGSPPVAGEK                       | S599      | 0.1562926  | 0.62028469 | 0.55688781 |
| Q9UNS1 | TIMELESS | QLLDSDEEQEEDGR                      | S1173     | 0.00907033 | 0.53067485 | 0.37254089 |
| Q9UNS1 | TIMELESS | RQLLDSDEEQEEDGR                     | S1173     | 0.0333834  | 0.6501201  | 0.43874459 |
| Q9UNS1 | TIMELESS | AGLASPEEEDAVGK                      | S1149     | 0.2200706  | 0.87065241 | 0.6048868  |
| Q9BVW5 | TIPIN    | AHTVEEVNTDEDQK                      | T244      | 0.07322909 | 0.76213592 | 0.49843227 |
| Q5JTD0 | TJAP1    | KDSLTAQEQGNLLN                      | S545      | 0.29107461 | 0.8378553  | 0.65205353 |
| Q5JTD0 | TJAP1    | GSPEEELPLAFEK                       | S300      | 0.64004735 | 0.95061728 | 0.84405606 |
| Q07157 | TJP1     | LEEPTAPSTSYSPQADSLR                 | S968      | 0.01836696 | 0.61141603 | 0.41830815 |
| Q07157 | TJP1     | VQIPVSRPDPEPVSNDNEEDSYDEEIHDPK      | S125,S131 | 0.39352731 | 1.66612096 | 0.71369567 |
| Q07157 | TJP1     | VQIPVSRPDPEPVSNDNEEDSYDEEIHDPK      | Y132,S125 | 0.4180189  | 1.62479879 | 0.72427252 |
| Q07157 | TJP1     | SREDLSAQPVQTK                       | S617      | 0.4811058  | 0.95107604 | 0.75589799 |
| Q07157 | TJP1     | AEASSVPVYLSPETNPASSTSAVNHNVNLTNVR   | S927      | 0.58594274 | 1.51314253 | 0.8200322  |
| Q9UDY2 | TJP2     | GRSIDQDYER                          | S244      | 0.08410854 | 1.31734474 | 0.50397847 |
| O95049 | TJP3     | SSEPVAQESQSPR                       | S870      | 0.17420431 | 0.72954495 | 0.56898248 |
| Q04724 | TLE1     | DASSPASTASSASSTLK                   | S286      | 0.0622685  | 0.66711957 | 0.47702638 |
| Q04726 | TLE3     | ESSANNVSPSESRLR                     | S203      | 0.01027624 | 0.70696547 | 0.37254089 |
| Q04726 | TLE3     | DAPTSASVASSSTPSSK                   | S286      | 0.08353281 | 0.82363474 | 0.50397847 |
| Q04727 | TLE4     | SSVSPSASFR                          | S208      | 0.29444288 | 0.82790071 | 0.6555018  |
| Q9Y490 | TLN1     | DHFGLGDEESTMLEDSVSPK                | S425      | 0.50690973 | 1.32533781 | 0.76766855 |
| Q9Y4G6 | TLN2     | LDEGTPEPK                           | T1843     | 0.83163134 | 1.02820915 | 0.93808376 |
| Q969X1 | TMBIM1   | AVSDSFGPGEWDRK                      | S81       | 0.39048257 | 0.83962584 | 0.71132527 |
| O94876 | TMCC1    | FGSADNIPNLK                         | S382      | 0.4073209  | 0.85694998 | 0.71690855 |
| Q92545 | TMEM131  | RSSDPWSNSHFPHEN                     | S1871     | 0.16578789 | 0.80179628 | 0.56312413 |
| Q92545 | TMEM131  | DFDHHDSPALEVFTEQPPSPLK              | S1375     | 0.73248886 | 1.09872885 | 0.89605782 |
| Q96A57 | TMEM230  | TNLATGIPSSK                         | S15       | 0.08260486 | 5.56844319 | 0.50397847 |
| Q96A57 | TMEM230  | LSSTDDGYIDLQFK                      | S24       | 0.22373886 | 1.48388179 | 0.6080317  |
| Q9Y2B1 | TMEM5    | GREQSTLESEEWNPWEGDEK                | S59       | 0.77216123 | 0.90984879 | 0.91329931 |
| Q9NW97 | TMEM51   | QGEDLAHVQHTGAGPHAQEEDSQQEEEEDEEAASR | S115      | 0.73280992 | 0.93084063 | 0.89605782 |
| Q9NW97 | TMEM51   | ADVEASPGNPPDRQNSK                   | S192      | 0.97162446 | 0.99582289 | 0.98966465 |
| P82094 | TMF1     | SATPVNCEQPDILVSSTPINEGQTVLDK        | T401      | 0.21213396 | 1.71863569 | 0.59909252 |
| Q9NYL9 | TMOD3    | DLDEDELLGNLSETLK                    | S25       | 0.98486254 | 0.9942674  | 0.9949188  |
| P42167 | TMPO     | GPPDFSSDEEREPTVLGSGAAAAGR           | T74       | 0.24926724 | 1.33091787 | 0.61802971 |
| P42167 | TMPO     | SSTPLTISSAENR                       | T160      | 0.2835182  | 1.25533597 | 0.64836433 |
| P42167 | TMPO     | SSTPLTISSAENR                       | T164      | 0.29109678 | 1.18997825 | 0.65205353 |
| P42167 | TMPO     | GPPDFSSDEEREPTVLGSGAAAAGR           | S66       | 0.38019037 | 0.84227966 | 0.70800664 |
| P42167 | TMPO     | GPPDFSSDEEREPTVLGSGAAAAGR           | T74,S66   | 0.44423706 | 1.22814278 | 0.73811209 |
| P42167 | TMPO     | SSTPLTISSAENR                       | S167      | 0.54286539 | 1.16265819 | 0.79120965 |
| P42167 | TMPO     | QNGSNDSDRYSDNEEDSK                  | S184      | 0.54475701 | 1.09305761 | 0.79229018 |
| P42167 | TMPO     | GPPDFSSDEEREPTVLGSGAAAAGR           | S66,S67   | 0.9061174  | 1.06538293 | 0.96653745 |
| Q9H3N1 | TMX1     | SLGFSLATDK                          | S270      | 0.17273107 | 0.71301775 | 0.56561687 |

|        |          |                              |             |            |            |            |
|--------|----------|------------------------------|-------------|------------|------------|------------|
| Q9H3N1 | TMX1     | VEEEQEAEEDVSEEEAESK          | S247        | 0.47938759 | 0.80259563 | 0.75541886 |
| Q9H3N1 | TMX1     | KVEEEQEAEEDVSEEEAESK         | S247        | 0.63894406 | 0.93368421 | 0.84343554 |
| Q9H3N1 | TMX1     | QRSILGSLATDK                 | S270        | 0.89952934 | 1.00902379 | 0.96360157 |
| Q9Y320 | TMX2     | AGDNIPPEEQVASTPTTVSDGENKK    | S288        | 0.04209982 | 0.67878077 | 0.45441331 |
| Q9Y320 | TMX2     | AGDNIPPEEQVASTPTTVSDGENK     | S288        | 0.04999665 | 0.57009346 | 0.45652016 |
| Q9H1E5 | TMX4     | DDSNEEENKDSLVDDEEEK          | S259        | 0.1869622  | 0.82071152 | 0.57474321 |
| Q07912 | TNK2     | KPTYDVPSEDQDPLSSDFK          | T517        | 0.57631236 | 0.85727036 | 0.81432655 |
| Q9C0C2 | TNKS1BP1 | RFSEGLVQSPSQDQEK             | S429,S435   | 0.00280789 | 0.54290045 | 0.27314524 |
| Q9C0C2 | TNKS1BP1 | EAAFSPGQQDWSR                | S1103       | 0.03430484 | 0.7884973  | 0.43874459 |
| Q9C0C2 | TNKS1BP1 | NMAPAGVAVCPGSEK              | S1297       | 0.06907811 | 0.71688548 | 0.49170374 |
| Q9C0C2 | TNKS1BP1 | WSDQGPAAQTSR                 | S1533       | 0.07323076 | 1.21527057 | 0.49843227 |
| Q9C0C2 | TNKS1BP1 | FSEGLVQSPSQDQEK              | S435        | 0.08380817 | 0.51032791 | 0.50397847 |
| Q9C0C2 | TNKS1BP1 | VSGAGFSPSSK                  | S1138       | 0.0899595  | 0.83508246 | 0.51018936 |
| Q9C0C2 | TNKS1BP1 | TEAQDLCRASPEPPGPESSSR        | S672        | 0.10603939 | 1.23178808 | 0.52598269 |
| Q9C0C2 | TNKS1BP1 | HNGSLPLGLEAR                 | S1385       | 0.22222744 | 1.27937159 | 0.6080317  |
| Q9C0C2 | TNKS1BP1 | SQEAADVQDWEFR                | S836        | 0.24238864 | 0.76054217 | 0.61278278 |
| Q9C0C2 | TNKS1BP1 | VPSSDEEVVEEPQSR              | S1621       | 0.2798594  | 1.10116796 | 0.64555595 |
| Q9C0C2 | TNKS1BP1 | SFGTRPLSSGFPEEAQQDDEEFK      | S983        | 0.30293194 | 1.25209657 | 0.65956859 |
| Q9C0C2 | TNKS1BP1 | RFSEGLVQSPSQDQEK             | S429        | 0.30380894 | 1.26056035 | 0.66097157 |
| Q9C0C2 | TNKS1BP1 | DTQSPSTCEGGLGWSQK            | S712        | 0.31336568 | 0.81622018 | 0.66321511 |
| Q9C0C2 | TNKS1BP1 | GWSEQPQVK                    | S221        | 0.38273737 | 1.13919414 | 0.70884547 |
| Q9C0C2 | TNKS1BP1 | DTQSPSTCEGGLGWSQK            | T710        | 0.41858289 | 0.8871581  | 0.72427252 |
| Q9C0C2 | TNKS1BP1 | SAEEGELAESK                  | S1666       | 0.43351246 | 0.86535579 | 0.73152094 |
| Q9C0C2 | TNKS1BP1 | RDSLGAAYASQDANEQGGDLGK       | S893        | 0.49693155 | 0.91441804 | 0.76446134 |
| Q9C0C2 | TNKS1BP1 | NRSAEEGELAESK                | S1666       | 0.4973548  | 1.06067678 | 0.76446134 |
| Q9C0C2 | TNKS1BP1 | RDSLGLTYSR                   | S872        | 0.61065451 | 1.1166547  | 0.83095214 |
| Q9C0C2 | TNKS1BP1 | SQEAADVQDWEFRK               | S836        | 0.72556029 | 1.04770017 | 0.89291515 |
| Q9C0C2 | TNKS1BP1 | VPSSDEEVVEEPQSR              | S1620       | 0.88883583 | 1.01199719 | 0.95935633 |
| Q9C0C2 | TNKS1BP1 | YESQEPLAQESPLPLATR           | S601        | 0.99001748 | 0.99799398 | 0.99621995 |
| Q8NDV7 | TNRC6A   | EEPTGWEEPEPESIR              | S991        | 0.01745441 | 0.6213974  | 0.41830815 |
| Q68CZ2 | TNS3     | GVGSGHPHPTDQQPSPSK           | S660        | 0.02032566 | 0.73873874 | 0.41830815 |
| Q68CZ2 | TNS3     | ASEAASPLDPSGDK               | S1149       | 0.05726911 | 0.58524979 | 0.47702638 |
| Q68CZ2 | TNS3     | KLSLQYDNDAGGQLPFSK           | S776        | 0.470866   | 1.57074893 | 0.74973768 |
| Q96GM8 | TOE1     | AADSDDGAVSAPAAASDGGVSK       | S5          | 0.65638594 | 0.94945055 | 0.85263945 |
| O75674 | TOM1L1   | EATNTTSEPSAPSQDLDLSPSR       | S323        | 0.23391001 | 0.80409694 | 0.80403017 |
| O94826 | TOMM70A  | ASPAPGSGHPEGGAHLDMNSLDR      | S91         | 0.14009372 | 0.52577148 | 0.54797298 |
| P11387 | TOP1     | ENGFSPPQIK                   | S112        | 0.4910179  | 0.82450721 | 0.76263004 |
| P11387 | TOP1     | ENGFSPPQIKDEPEDDGYFVPPK      | S112        | 0.93703483 | 0.97719083 | 0.97792363 |
| P11388 | TOP2A    | TQMAEVLPSR                   | S1213       | 0.01001017 | 0.56200528 | 0.37254089 |
| P11388 | TOP2A    | SVVSDLEADDVK                 | S1377       | 0.01268066 | 0.54307999 | 0.39919401 |
| P11388 | TOP2A    | VPDEEENEESDNEK               | S1106       | 0.03144894 | 0.66597572 | 0.43874459 |
| P11388 | TOP2A    | NENTEGSPQEDGVELEGLK          | S1247       | 0.12531178 | 0.86469345 | 0.5401424  |
| P11388 | TOP2A    | SVVSDLEADDVK                 | S1374       | 0.17883889 | 0.59665949 | 0.56898248 |
| P11388 | TOP2A    | TDEDFVPSDASPPK               | T1343       | 0.20748831 | 0.3073124  | 0.59203789 |
| P11388 | TOP2A    | YLEESDEDDLF                  | S1525       | 0.9608631  | 1.02513778 | 0.98502328 |
| P11388 | TOP2A    | GSVPLSSPPTHFDETEITNPVVK      | S1393       | 0.98771274 | 0.99359682 | 0.99494412 |
| Q02880 | TOP2B    | DEYTFSPGK                    | S1424       | 0.16892656 | 0.55646344 | 0.5637433  |
| Q02880 | TOP2B    | ASGSENEGYNPGR                | S1552       | 0.23134694 | 0.81548155 | 0.6080317  |
| Q02880 | TOP2B    | KASGSENEGYNPGR               | S1552       | 0.37504987 | 0.81076962 | 0.70314194 |
| Q02880 | TOP2B    | ASPIITNDGEDEFVPSDGLDK        | S1400,S1413 | 0.49546365 | 1.23808577 | 0.76416336 |
| Q02880 | TOP2B    | ASPIITNDGEDEFVPSDGLDK        | S1413       | 0.51552587 | 0.89493433 | 0.77421589 |
| Q02880 | TOP2B    | VKASPIITNDGEDEFVPSDGLDK      | S1400,S1413 | 0.61188837 | 0.77691293 | 0.83176861 |
| Q02880 | TOP2B    | VVEAVNSDSEFGIPK              | S1522       | 0.67331657 | 1.07050654 | 0.86131187 |
| Q02880 | TOP2B    | FDSNEEDSASVFSFGLK            | S1466       | 0.72163211 | 1.07769572 | 0.8914279  |
| Q02880 | TOP2B    | KASGSENEGYNPGR               | S1550,S1552 | 0.77611783 | 0.95268362 | 0.91412088 |
| Q02880 | TOP2B    | ASPIITNDGEDEFVPSDGLDK        | S1400       | 0.92221149 | 0.98540541 | 0.97154665 |
| Q5JTV8 | TOR1AIP1 | DSHSSEDEASSQDLSQTISK         | S157        | 0.08328536 | 0.70545964 | 0.50397847 |
| Q5JTV8 | TOR1AIP1 | VNFSEEGETEEDDQDSSHSSVTTVK    | S215        | 0.3372142  | 1.07389759 | 0.67736506 |
| Q5JTV8 | TOR1AIP1 | VNFSEEGETEEDDQDSSHSSVTTVK    | T220        | 0.50515696 | 0.86160109 | 0.76766855 |
| Q5JTV8 | TOR1AIP1 | VNFSEEGETEEDDQDSSHSSVTTVK    | T220,S215   | 0.91085846 | 1.01439539 | 0.9669909  |
| Q5JTV8 | TOR1AIP1 | DSHSSEDEASSQDLSQTISK         | S154,S156   | 0.99621768 | 0.99787049 | 0.99853716 |
| O94842 | TOX4     | LSTTPSPTSSLHEDGVDFRR         | T180,S178   | 0.50815242 | 1.11788618 | 0.7685889  |
| Q12888 | TP53BP1  | NGSTAVAESAASPK               | S1028       | 0.06788808 | 0.7087959  | 0.49083932 |
| Q12888 | TP53BP1  | LITSEERSPAK                  | S1678       | 0.11016423 | 0.68591224 | 0.53343618 |
| Q12888 | TP53BP1  | NSPEDLGLSLTDGDSK             | S500        | 0.15067128 | 1.15600167 | 0.55645143 |
| Q12888 | TP53BP1  | CSDSQSWEDIAPEIPCAENR         | S786        | 0.15669631 | 1.24465005 | 0.55688781 |
| Q12888 | TP53BP1  | SPEPEVLSTQEDLFDQSNK          | S294        | 0.19066232 | 1.16841202 | 0.57584619 |
| Q12888 | TP53BP1  | STPFIVPSPTEQEQR              | S380        | 0.24067903 | 1.06582459 | 0.61232743 |
| Q12888 | TP53BP1  | MVIQGPSSPQGEAMVTDVLEDQK      | S1113       | 0.269171   | 1.49563512 | 0.63502787 |
| Q12888 | TP53BP1  | SLVQDLSSTNSDLVAPSPDAFR       | S366        | 0.34298646 | 2.53531673 | 0.67878924 |
| Q12888 | TP53BP1  | SEDMFPSPK                    | S265        | 0.56112259 | 1.09059549 | 0.80509013 |
| Q12888 | TP53BP1  | SGTAETEPVEQDSSQPSLPLVR       | S831        | 0.61975279 | 1.05853659 | 0.83506597 |
| Q12888 | TP53BP1  | FVPAENDSILMNPAAQDGEVQLSQNDDK | S580        | 0.66351709 | 1.1141268  | 0.85711256 |
| Q12888 | TP53BP1  | GNLHFPSSQGEK                 | S1068       | 0.68848048 | 1.03189793 | 0.86958941 |
| Q12888 | TP53BP1  | IDEDGENTQIEDTEPMSPLVNSK      | S552        | 0.88819589 | 0.97090038 | 0.95935633 |
| Q13625 | TP53BP2  | NQSSIEDLR                    | S480        | 0.28113275 | 0.70498791 | 0.64555595 |
| Q13625 | TP53BP2  | RSITEPEGPNGPNIQK             | S737        | 0.52110901 | 0.87676377 | 0.77620221 |
| P12270 | TPR      | TDFAEAIHSPQVAGVPR            | S2155       | 0.10465144 | 1.65298964 | 0.52486294 |
| P12270 | TPR      | AADSQNSGEGNTGAAESSFSQEVSR    | S2048       | 0.110236   | 0.67433962 | 0.53343618 |
| Q9ULW0 | TPX2     | SSDQPLTPVSPK                 | S738        | 0.01669438 | 0.51798202 | 0.41830815 |
| Q9ULW0 | TPX2     | SPAFALK                      | S486        | 0.04864615 | 0.59495809 | 0.45625798 |

|        |           |                                                |           |            |            |            |
|--------|-----------|------------------------------------------------|-----------|------------|------------|------------|
| Q13595 | TRA2A     | RSPSPYYSR                                      | S260,S262 | 0.06190126 | 0.85506706 | 0.47702638 |
| Q13077 | TRAF1     | CRGEDLQISPGSR                                  | S64       | 0.16487045 | 1.22030851 | 0.56274908 |
| Q8TDR0 | TRAF3IP1  | RQDSMEALQMDR                                   | S476      | 0.64554709 | 0.86169889 | 0.84855908 |
| Q9BUZ4 | TRAF4     | GSLDESSLGFGYPK                                 | S426      | 0.16772623 | 0.76853589 | 0.56312413 |
| Q6QOC0 | TRAF7     | STFSLPEEEEEPEPLVFAEQPSVK                       | S105      | 0.92535577 | 1.01810744 | 0.97221637 |
| O14545 | TRAFD1    | LDSQPQETSPELPR                                 | S415      | 0.15682967 | 0.85974359 | 0.55688781 |
| O14545 | TRAFD1    | ALPSLNTGSSSPR                                  | S327      | 0.3152683  | 0.7478085  | 0.66410833 |
| O14545 | TRAFD1    | LDSQPQETSPELPR                                 | T414      | 0.71200389 | 0.94680398 | 0.88466484 |
| Q8WVT3 | TRAPPC12  | VRDEAEPGGEGDPGPEPAGTTPSPSGEADGDCAPEDAAPSSGGAPR | S111      | 0.42910846 | 0.70494136 | 0.73016282 |
| Q8WVT3 | TRAPPC12  | VRDEAEPGGEGDPGPEPAGTTPSPSGEADGDCAPEDAAPSSGGAPR | T107,S111 | 0.82800423 | 1.06937215 | 0.9364171  |
| Q96PN7 | TRERF1    | SNSIDGSNVTPTPGGEQTVDVPEPR                      | S756      | 0.78623705 | 0.94089591 | 0.92039443 |
| O95361 | TRIM16    | ETEEQDSDSAEQGDPAGEGK                           | S62       | 0.21497633 | 1.09446847 | 0.60251104 |
| O95361 | TRIM16    | ATAQPPAPLSPDPSGSPDPSGSASPVEEEDVGSSEK           | S24       | 0.22751194 | 0.78785943 | 0.6080317  |
| O95361 | TRIM16    | ETEEQDSDSAEQGDPAGEGK                           | S60       | 0.35014051 | 1.12947433 | 0.68418829 |
| Q14258 | TRIM25    | ASAPSPNAQVACDHCLK                              | S100      | 0.93669397 | 0.98082972 | 0.97786421 |
| Q13263 | TRIM28    | LASPSGSTSSGLEVVAVEPGTSAAPGGGPGTLDDSATICR       | S600,S601 | 0.38701278 | 1.41650711 | 0.71060254 |
| Q13263 | TRIM28    | LASPSGSTSSGLEVVAVEPGTSAAPGGGPGTLDDSATICR       | S594      | 0.45228734 | 1.6905638  | 0.73811209 |
| Q13263 | TRIM28    | SGEGEVSGLMR                                    | S473      | 0.45919294 | 0.83911368 | 0.74160036 |
| Q13263 | TRIM28    | SRSGEVSGLMR                                    | S471      | 0.61067007 | 0.85073341 | 0.83095214 |
| Q13263 | TRIM28    | QSGSGSQPMVEQEGYGFSGDDPYSSAEPHVSQVK             | S439      | 0.75431788 | 0.93746012 | 0.90771166 |
| Q13263 | TRIM28    | SRSGEVSGLMR                                    | S473      | 0.8589459  | 0.95224341 | 0.90581852 |
| O75382 | TRIM3     | REDSPGPEVQPMQDK                                | S7        | 0.76681323 | 1.05437162 | 0.91222963 |
| Q9BRZ2 | TRIM56    | QGGVQPAGQDGAQTPK                               | T418      | 0.98735211 | 1.00301117 | 0.99494412 |
| Q15642 | TRIP10    | APSDSSLTTPSDGRPELR                             | S296      | 0.36079833 | 1.132      | 0.692567   |
| Q15642 | TRIP10    | APSDSSLTTPSDGRPELR                             | S296,S299 | 0.44798004 | 0.91150895 | 0.73811209 |
| Q14669 | TRIP12    | DDSDLSPQGR                                     | S991      | 0.04242181 | 0.47025597 | 0.45441331 |
| Q14669 | TRIP12    | SESPPAELPSLR                                   | S312      | 0.14032195 | 0.71786825 | 0.54797298 |
| Q14669 | TRIP12    | QFSIQAEERESTDDENPLGR                           | S1376     | 0.38822283 | 1.24145474 | 0.71060254 |
| Q14669 | TRIP12    | RSEPPAELPSLR                                   | S312      | 0.59332302 | 0.89639344 | 0.82284423 |
| Q9H3H1 | TRIT1     | LDSDAVNTIESQVSPDHNK                            | S441      | 0.05129887 | 0.68525925 | 0.45652016 |
| Q7Z2T5 | TRMT1L    | YSTPTTYGQSESHVQSASEDTVTER                      | S707      | 0.69603244 | 0.92441229 | 0.97391021 |
| Q92574 | TSC1      | GGFDSPFYR                                      | S505      | 0.55204826 | 1.18178477 | 0.79722272 |
| P49815 | TSC2      | GQPEGPLPSSSPR                                  | S1449     | 0.05082904 | 0.64223788 | 0.45652016 |
| Q9Y3Q8 | TSC2D4    | SPDPFGAVAAQK                                   | S279      | 0.49280534 | 0.81770183 | 0.76351366 |
| Q9UJK0 | TSR3      | GGASSSCCEEQIQGR                                | S282      | 0.43316199 | 0.83158655 | 0.73152094 |
| Q6PID6 | TTC33     | KSEAPAEVTHFSPK                                 | S197      | 0.11459928 | 1.20734381 | 0.53343618 |
| Q6PID6 | TTC33     | SEAPAEVTHFSPK                                  | S197      | 0.78474056 | 0.9202331  | 0.92039443 |
| Q9ULT0 | TTC7A     | LPNSIASR                                       | S182      | 0.25034307 | 0.82492869 | 0.61849465 |
| Q15361 | TTF1      | DIFYEDDSEGEDIEK                                | S872      | 0.63534466 | 1.13730812 | 0.8428508  |
| Q9BQE3 | TUBA1C    | TIGGGDDSFNTFFSETGAGK                           | S48       | 0.37827745 | 0.85236448 | 0.7053533  |
| Q12792 | TWF1      | YLLSQSPAPLTAEEELR                              | S142      | 0.30676934 | 1.26629296 | 0.66139614 |
| Q3B726 | TWISTNB   | HQEVQDQDPVQFGSDSSGYQSDHK                       | S300      | 0.04696212 | 0.65374314 | 0.45625798 |
| Q3B726 | TWISTNB   | HQEVQDQDPVQFGSDSSGYQSDHK                       | S304      | 0.05575465 | 0.71732378 | 0.47702638 |
| Q3B726 | TWISTNB   | HQEVQDQDPVQFGSDSSGYQSDHKK                      | S304      | 0.25134775 | 0.73163396 | 0.61962985 |
| Q3B726 | TWISTNB   | KHSEEAFTPLK                                    | S316      | 0.37235911 | 0.71111111 | 0.7112243  |
| P40222 | TXLNA     | SSPGQPEAGPEGAQERPSQAAPAVEAEGPGSSQAPR           | S18       | 0.04712721 | 0.60381192 | 0.45625798 |
| P40222 | TXLNA     | SSPGQPEAGPEGAQERPSQAAPAVEAEGPGSSQAPR           | S35       | 0.04910653 | 0.66030361 | 0.45625798 |
| P40222 | TXLNA     | RPEGPGAQAPSSPR                                 | S515      | 0.92416788 | 0.99297259 | 0.9718589  |
| O43396 | TXNL1     | QHLENDPGSNEDTDIPK                              | T117      | 0.06150498 | 1.48171925 | 0.47702638 |
| O15042 | U2SURP    | LYSILQGDSPPTK                                  | S485      | 0.05692347 | 0.65777335 | 0.47702638 |
| Q14157 | UBAP2L    | RYPSSISSPQK                                    | S605,S609 | 0.00683407 | 0.48246782 | 0.34222215 |
| Q14157 | UBAP2L    | STSAPQMSPGSSDNQSSSPQPAQKQ                      | S477      | 0.01102471 | 0.55711208 | 0.37969115 |
| Q14157 | UBAP2L    | NPSDSAVHSPFTK                                  | S412      | 0.02925609 | 0.71125204 | 0.43032203 |
| Q14157 | UBAP2L    | RYPSSISSPQK                                    | S609      | 0.05009329 | 0.85586319 | 0.45652016 |
| Q14157 | UBAP2L    | STSAPQMSPGSSDNQSSSPQPAQKQ                      | S471,S475 | 0.06850055 | 0.50821321 | 0.45083932 |
| Q14157 | UBAP2L    | STSAPQMSPGSSDNQSSSPQPAQKQ                      | S470      | 0.89835185 | 0.98282828 | 0.96293924 |
| Q14157 | UBAP2L    | SPAVATSTAAPPPSSPLPSK                           | S454      | 0.97657815 | 0.98085703 | 0.99096498 |
| Q96LR5 | UBE2E2    | VDDSPSTSGSSDGDQR                               | S19       | 0.42477893 | 0.87619371 | 0.7285551  |
| Q96LR5 | UBE2E2    | VDDSPSTSGSSDGDQRESVQQEPPER                     | S18       | 0.76186365 | 1.06249346 | 0.90951853 |
| Q9COC9 | UBE20     | SEAESASPEETPDGSASPVEMQDEGAEPHEAGEQLPFLK        | S441      | 0.74289657 | 1.03117084 | 0.90061831 |
| O95155 | UBE4B     | SQSMDDIDGVSCEK                                 | S105      | 0.13562225 | 1.21883657 | 0.5475768  |
| O95155 | UBE4B     | SQSSEGVSSLSSPNSLETQSQSLR                       | S88       | 0.93068868 | 1.02907294 | 0.97583851 |
| Q5T4S7 | UBR4      | HVTLPSSPR                                      | S2719     | 0.45386565 | 1.10170506 | 0.73871138 |
| Q5T4S7 | UBR4      | TSPADHGGVSGSESGGSAVDSVAGEHVSVGR                | S2885     | 0.64584448 | 1.1244898  | 0.84855908 |
| O95071 | UBR5      | WLDGASFDR                                      | S327      | 0.65040591 | 0.83401974 | 0.84963106 |
| Q14CS0 | UBXN2B    | LGSLTPEIVTSPSSPEEEDK                           | S234      | 0.42543742 | 0.77275901 | 0.7291324  |
| Q92890 | UFD1L     | FVAFSGEGQSLR                                   | S299      | 0.74166735 | 0.9080756  | 0.90061831 |
| Q96T88 | UHRF1     | ERDSELSDDTSGCCLGQSESDK                         | S91       | 0.0202445  | 0.49118208 | 0.41830815 |
| Q96T88 | UHRF1     | ERDSELSDDTSGCCLGQSESDK                         | S88       | 0.02972338 | 0.35999412 | 0.43032203 |
| A0JNW5 | UHRF1BP1L | DHNVSGPPSPHTASQHTQTEK                          | S414,S418 | 0.52351896 | 0.9224537  | 0.77709199 |
| Q96PU4 | UHRF2     | RPISDDDCPSASK                                  | S667      | 0.96244629 | 1.00707144 | 0.98552217 |
| Q96RL1 | UIMC1     | DVETTSSVSK                                     | S29       | 0.12668712 | 0.43560479 | 0.5403576  |
| Q96RL1 | UIMC1     | VPSPGMEEAGCSR                                  | S653      | 0.9675082  | 1.00749025 | 0.98758099 |
| O75385 | ULK1      | SGSTSPPLGFR                                    | S469      | 0.89376505 | 1.03626726 | 0.96131381 |
| Q9H1C4 | UNC93B1   | YLEEDNSDESDAEAGEHGDGAEAAAAPPAGPRGPPEAGLGR      | S547,S550 | 0.35113561 | 1.61330009 | 0.68418829 |
| P13051 | UNG       | APAGQEEPTPPSSPLSAEQDR                          | T60       | 0.04328641 | 0.46243108 | 0.45441331 |
| P13051 | UNG       | HAPSPPEAVQGTGVAGVPEESGDAAAIAPAK                | S23       | 0.32536933 | 0.61544432 | 0.67180574 |
| O94763 | URI1      | SISCEEAATCSDTSESILEEPPQENQK                    | S440      | 0.15573315 | 0.77970297 | 0.55688781 |
| O94763 | URI1      | NSTGSGHSAQELPTIR                               | S372      | 0.25091092 | 0.759375   | 0.61945319 |
| O94763 | URI1      | KNSTGSGHSAQELPTIR                              | S372      | 0.89949145 | 0.96647814 | 0.96360157 |
| O60763 | USO1      | DLGHPVEEEDLESGDQDEDEDESEDPGK                   | S942      | 0.04900552 | 1.45758929 | 0.45625798 |

|        |         |                                    |             |            |            |            |
|--------|---------|------------------------------------|-------------|------------|------------|------------|
| O94782 | USP1    | VEESSEISPEPK                       | S475        | 0.0023659  | 0.32645459 | 0.27314524 |
| Q14694 | USP10   | TCNSPQNSTDSVSDIVPDSPPFPGALGSDTR    | T216        | 0.34576397 | 1.57095214 | 0.6804635  |
| Q14694 | USP10   | YSPPAISPLVSEK                      | S365        | 0.68597457 | 0.90065716 | 0.86856486 |
| Q14694 | USP10   | NHSVNEEEQEEQEGEGSEDEWEQVGR         | S576        | 0.902088   | 1.04108392 | 0.96458226 |
| P51784 | USP11   | YVTKPNSDDDDGDEK                    | S648        | 0.07196768 | 1.38511327 | 0.49571338 |
| Q9Y4E8 | USP15   | GASAAATGIPLESDESDNDNDNIENENCMHTN   | S961        | 0.23617863 | 0.81469115 | 0.6080317  |
| Q9Y4E8 | USP15   | SPGASNFSTLPK                       | S229        | 0.36129359 | 0.81440781 | 0.692567   |
| Q9Y5T5 | USP16   | TVEDEDQDSEEEK                      | S415        | 0.40942084 | 1.32856228 | 0.71721535 |
| Q9Y2K6 | USP20   | SSSPCRTPEPDNDAHLR                  | S373        | 0.10647262 | 1.50588603 | 0.52610002 |
| Q70CQ2 | USP34   | DSSIIDPGTEQLDLPSPENSSVK            | S3406       | 0.23434399 | 0.80095166 | 0.6080317  |
| Q9P275 | USP36   | DVVLSTSPK                          | S582        | 0.13960454 | 0.66327025 | 0.54797298 |
| Q53GS9 | USP39   | EVDEDESEPEREVR                     | S82         | 0.22960039 | 1.24510515 | 0.6080317  |
| Q9H9J4 | USP42   | DAEPQPGSPAAESLEEPDAAAAGLSSTK       | S754        | 0.061463   | 0.68540434 | 0.47702638 |
| Q9H9J4 | USP42   | DSALAEAEPLSPAPPAR                  | S856        | 0.14063831 | 0.76855285 | 0.54797298 |
| Q96K76 | USP47   | DGEQQLLEDSSAGEDSVHDR               | S142        | 0.35112343 | 0.92002785 | 0.68418829 |
| Q96K76 | USP47   | ELEQHIQTSDPENFQSEER                | S933        | 0.43286026 | 1.05654762 | 0.73152094 |
| P45974 | USP5    | SAADSISESPVVGPK                    | S783        | 0.37468509 | 0.81665448 | 0.70284065 |
| Q70EL1 | USP54   | GDEPQASGYHSEGETLK                  | S481        | 0.5322942  | 0.86280841 | 0.78476937 |
| Q92738 | USP6NL  | IEVLPVDTGAGGYSGNSGSPK              | S716        | 0.45761759 | 0.84647006 | 0.74096613 |
| Q93009 | USP7    | AGEQQLSEPEMDMEMEAGTDDPPR           | S18         | 0.36527416 | 0.86749423 | 0.69618384 |
| P40818 | USP8    | SYSSPDITQAIQEEK                    | S718        | 0.23467348 | 0.77846471 | 0.6080317  |
| P40818 | USP8    | RSYSSPDITQAIQEEK                   | S718        | 0.88161213 | 0.99139044 | 0.95761744 |
| Q93008 | USP9X   | NGILAIEGSGSDVDDMSGDEK              | S1600       | 0.40525358 | 1.21841265 | 0.7160132  |
| Q9BVJ6 | UTP14A  | DSGSQEVLELSELR                     | S451        | 0.03977452 | 1.49140105 | 0.44899888 |
| Q9BVJ6 | UTP14A  | RSELSQDAEPAGSQETK                  | S445        | 0.32186922 | 1.11376493 | 0.67020204 |
| Q9Y5J1 | UTP18   | VQEHEDSGDSEVENEAK                  | S121        | 0.16162011 | 2.00402768 | 0.55797736 |
| Q9Y5J1 | UTP18   | TSSDDESEEDDILLQR                   | S205,S210   | 0.63852324 | 1.49882521 | 0.84338453 |
| Q9Y5J1 | UTP18   | VQEHEDSGDSEVENEAK                  | S121,S124   | 0.92274364 | 1.02253302 | 0.97154665 |
| O75691 | UTP20   | SLSDNQGPPTDPADSGGTSK               | T1741       | 0.88457829 | 1.0230608  | 0.95812202 |
| Q9P0L0 | VAPA    | VAHSDKPGSTASFR                     | S214        | 0.45226205 | 1.3664451  | 0.73811209 |
| O95292 | VAPB    | SLSSLDLDEVK                        | S158        | 0.0506682  | 0.4950396  | 0.45652016 |
| P50552 | VASP    | SSSVTTSETQCTPSSSDYDLQR             | S324        | 0.29784383 | 0.78971804 | 0.65817287 |
| P18206 | VCL     | SLLDASEAIK                         | S721        | 0.26516104 | 0.75114568 | 0.63400981 |
| P18206 | VCL     | DPSASPGDAGEQAIR                    | S290        | 0.42754983 | 1.13747126 | 0.72966058 |
| P55072 | VCP     | REDEEESLNEVGYDDIGGCR               | S197        | 0.17491401 | 1.30546645 | 0.56898248 |
| Q96JH7 | VCP1P1  | GNSVEELEEMDSQDAEMTNTTEPMDHS        | S1198       | 0.80325628 | 1.04218509 | 0.92467356 |
| P21796 | VDAC1   | LTFDSSFSPNTGK                      | S104        | 0.55248427 | 0.85069266 | 0.79746681 |
| P45880 | VDAC2   | LTFDTTFSPTNGK                      | S115        | 0.93006759 | 0.95432296 | 0.95783851 |
| Q9HBM0 | VEZT    | MCYQCESEDEPQADGSGLLTAPPTPR         | S696        | 0.27515685 | 0.84722864 | 0.64019666 |
| Q14135 | VGLL4   | TGPPPIPSK                          | S52         | 0.394961   | 0.85180851 | 0.71403973 |
| P08670 | VIM     | DGQVINETSQHHDLE                    | S459        | 0.02969049 | 0.55708341 | 0.43032203 |
| P08670 | VIM     | SLYASSPGGVYATR                     | S56         | 0.03895021 | 0.67591675 | 0.44872753 |
| P08670 | VIM     | QVQSLTCEVDALK                      | S325        | 0.14842841 | 0.62581941 | 0.53532644 |
| P08670 | VIM     | ETNLDLPLVDTHSK                     | S430        | 0.73953958 | 1.08643122 | 0.89994504 |
| Q9H9C1 | VIPAS39 | TRPGSFLSDALSDTPAK                  | S121        | 0.48691573 | 1.62061767 | 0.72466666 |
| Q8IV63 | VRK3    | GLNSFSPK                           | S59         | 0.06809748 | 0.44448442 | 0.49083932 |
| Q7Z5K2 | WAPAL   | RPESPSESPIK                        | S221        | 0.02638066 | 1.79182213 | 0.41830815 |
| Q7Z5K2 | WAPAL   | RPESPSESPIK                        | S221,S226   | 0.13804354 | 0.71135479 | 0.54797298 |
| Q9NQA3 | WASH6P  | QDDGSSASPSVQGAPR                   | S327        | 0.13420053 | 0.77216764 | 0.5475768  |
| O00401 | WASL    | VIVDFIEK                           | Y256        | 0.01831355 | 0.56347398 | 0.41830815 |
| O75717 | WDHD1   | RVVDESDETENQEEK                    | S1090       | 0.95977094 | 0.9922907  | 0.98502328 |
| Q8TBZ3 | WDR20   | SNSLPHSAVSNAGSK                    | S434        | 0.85860393 | 1.04076923 | 0.9505085  |
| Q9UNX4 | WDR3    | GSSPGIQDTLEAEDGAFETDEAPEDR         | S241        | 0.60697339 | 0.94274029 | 0.82983763 |
| Q5JSH3 | WDR44   | EYVSNDAQAQSDDEEK                   | S403        | 0.30472497 | 1.2405838  | 0.6612054  |
| Q5JSH3 | WDR44   | LTQTSSTEQLNLETETEVLNK              | T163        | 0.41998684 | 1.2940957  | 0.72466666 |
| Q5JSH3 | WDR44   | VGNESPVQELK                        | S50         | 0.89996236 | 0.98564593 | 0.96376566 |
| Q9H6Y2 | WDR55   | TCEERPAEDGSDDEEDPDSMEAPTR          | S14         | 0.61636646 | 1.12015504 | 0.83347439 |
| O43379 | WDR62   | TRLSTASEETVQNR                     | T50         | 0.06285952 | 0.39329687 | 0.47702638 |
| O43379 | WDR62   | TRLSTASEETVQNR                     | S49         | 0.21735887 | 0.55364044 | 0.60411977 |
| Q9NW82 | WDR70   | TMFAQVESDDEEAK                     | S638        | 0.872501   | 0.98345588 | 0.95542841 |
| Q8IWA0 | WDR75   | VQDTSNTGLGEDIIHQLSK                | S796        | 0.23540738 | 1.15926605 | 0.6080317  |
| O95785 | WIZ     | SPQLSLSPRASPK                      | S1012,S1017 | 0.0623251  | 0.58719888 | 0.47702638 |
| O95785 | WIZ     | TPALALAGSPTPK                      | T998        | 0.17719502 | 0.57972387 | 0.56898248 |
| Q9H4A3 | WNK1    | DRPVSQPSLVGSK                      | S167        | 0.01635901 | 0.65522554 | 0.41830815 |
| Q9H4A3 | WNK1    | DVDDGSGSPHSPHQLSSK                 | S2032       | 0.28728487 | 0.80227903 | 0.65007167 |
| Q9H4A3 | WNK1    | EKPELSEPHLNGPSSDPEAAFLSR           | S2002       | 0.8687628  | 1.03499742 | 0.95442216 |
| Q9H4A3 | WNK1    | EKPELSEPHLNGPSSDPEAAFLSR           | S2011,S2012 | 0.87554448 | 1.08885089 | 0.95556965 |
| Q9H4A3 | WNK1    | EKPELSEPHLNGPSSDPEAAFLSR           | S2012       | 0.97758709 | 1.00599455 | 0.99140457 |
| Q9BUR4 | WRAP53  | TLETQPLAPDCCPSQDPAPAHSPHSPAMNK     | S26,S30     | 0.05229103 | 0.63757116 | 0.46177    |
| Q9BUR4 | WRAP53  | EGDPVSLSTPLETEFGSPSELSR            | S90         | 0.52175032 | 1.11175626 | 0.77620221 |
| Q9BUR4 | WRAP53  | IEEQELSENTSLPAEANGSLSEEEANGPELGSGK | S114        | 0.9469886  | 1.02221967 | 0.98213577 |
| Q15007 | WTAP    | EGNTTEDDFPSSPGNGNK                 | S306        | 0.21203142 | 0.85047081 | 0.59909252 |
| Q8IX03 | WWC1    | SSTQTLLEDSWR                       | T835        | 0.19927462 | 0.68191577 | 0.58169594 |
| Q8IX03 | WWC1    | ETNTETPAPSPVVRPK                   | T895,S899   | 0.30919435 | 0.72623142 | 0.66139614 |
| Q01831 | XPC     | DEALSDGDDL                         | S94         | 0.57766586 | 0.81670732 | 0.8143599  |
| Q01831 | XPC     | SEAAAAPHTDAGGGLSSDEEEGTSSQAEAR     | S883,S884   | 0.79290061 | 1.13396825 | 0.9228136  |
| Q9COE2 | XPO4    | HQQQLLASPGSSTVDNK                  | S521        | 0.15790629 | 0.68020382 | 0.55688781 |
| Q9UBH6 | XPR1    | YNQISLR                            | S668        | 0.99161334 | 0.99821088 | 0.99691668 |
| P18887 | XRCC1   | TKPTQAAGPSSPQKPPTPEETK             | T453,S447   | 0.30506835 | 1.21412804 | 0.6612054  |
| Q9H0D6 | XRN2    | AEDSDSEPEEDNVR                     | S499,S501   | 0.69747826 | 1.14883122 | 0.87447728 |
| Q9H0D6 | XRN2    | NSPGSQVANSNR                       | S448        | 0.74441082 | 1.09103448 | 0.90171553 |

|        |          |                                                    |             |            |            |            |
|--------|----------|----------------------------------------------------|-------------|------------|------------|------------|
| Q8IY57 | YAF2     | SPPASSAASADQHSQSGSSDNTER                           | S136        | 0.05953067 | 0.62832282 | 0.47702638 |
| P46937 | YAP1     | QASTDAGTAGALTPQHVR                                 | S109        | 0.4875409  | 0.78627121 | 0.75953527 |
| P67809 | YBX1     | NEGSESAPEGQAQQR                                    | S176        | 0.06354632 | 0.77772829 | 0.47702638 |
| P67809 | YBX1     | NEGSESAPEGQAQQR                                    | S174        | 0.07272578 | 0.78585178 | 0.49843227 |
| P67809 | YBX1     | NYQQNYQNSSEGEK                                     | S165        | 0.11860702 | 0.55162644 | 0.5367708  |
| P67809 | YBX1     | AADPPAENSAPAEQGGAE                                 | S313        | 0.33249843 | 0.82323971 | 0.67622969 |
| P67809 | YBX1     | AADPPAENSAPAEQGGAE                                 | S314        | 0.34544801 | 0.84555354 | 0.68023038 |
| P67809 | YBX1     | NEGSESAPEGQAQQR                                    | S174,S176   | 0.52304702 | 1.29414152 | 0.77709199 |
| P16989 | YBX3     | ENQQATSQGNQPSVRR                                   | S324        | 0.37080567 | 1.26340882 | 0.70105255 |
| P16989 | YBX3     | SPVGSQAPQAAAPAAHVAGNPGGDAAPAAATGTAAAAALATAAGSEDAEK | S38         | 0.42954142 | 1.7223054  | 0.73017801 |
| P16989 | YBX3     | SPVGSQAPQAAAPAAHVAGNPGGDAAPAAATGTAAAAALATAAGSEDAEK | S34,S79     | 0.52370224 | 1.38661369 | 0.77709199 |
| P16989 | YBX3     | SPVGSQAPQAAAPAAHVAGNPGGDAAPAAATGTAAAAALATAAGSEDAEK | S34         | 0.59113118 | 1.36921311 | 0.82284423 |
| P16989 | YBX3     | ENQQATSQGNQPSVRR                                   | S324        | 0.77094961 | 1.07114229 | 0.91329931 |
| P16989 | YBX3     | AGEAPTENPAPPTQSSAE                                 | S370        | 0.86881333 | 0.94239079 | 0.95442216 |
| Q9H650 | YTHDC2   | KSSADTEFSECTTAER                                   | T1205       | 0.08774632 | 0.6455692  | 0.50672665 |
| Q9H650 | YTHDC2   | KSSADTEFSECTTAER                                   | S1202       | 0.12315017 | 0.69333452 | 0.5389189  |
| Q9H650 | YTHDC2   | VDGIPNDSSEMEDK                                     | S1090       | 0.67860732 | 0.91085652 | 0.8627275  |
| P62258 | YWHAE    | AAFDDAIAELDTLSEESYK                                | S210        | 0.10013797 | 2.19728798 | 0.52414255 |
| Q9HC78 | ZBTB20   | DSQAEPTQPEQAAEPAEGGPQTNQLETGASSPER                 | S432        | 0.21514081 | 0.72497047 | 0.60251104 |
| Q9ULJ3 | ZBTB21   | VNEHGSVPSEDNFEEGSSPTLLDADFPDSDLNK                  | S516        | 0.02151538 | 3.6246482  | 0.41830815 |
| Q9ULJ3 | ZBTB21   | IQPLEPDSPTGLSENTPATEK                              | T1005       | 0.40432007 | 0.78514987 | 0.7160132  |
| Q9ULJ3 | ZBTB21   | SFSASQSTDRREGASPVTEVR                              | S411        | 0.62050258 | 1.2031685  | 0.83542255 |
| Q9ULJ3 | ZBTB21   | TEPSSPLDPSDIIR                                     | S435        | 0.91717364 | 1.01611942 | 0.9695353  |
| Q9ULJ3 | ZBTB21   | VNEHGSVPSEDNFEEGSSPTLLDADFPDSDLNK                  | S504        | 0.95436212 | 0.98728721 | 0.98367301 |
| Q9H5J0 | ZBTB3    | VEAIVISDEETDVSDEQPQGER                             | S362        | 0.17258468 | 0.82207071 | 0.85651687 |
| Q9NUA8 | ZBTB40   | AETEEAAHSVQEMSVNSPTAQESQR                          | S190        | 0.08711226 | 0.67222048 | 0.50672665 |
| O95365 | ZBTB7A   | GGAPDPSPGATATPGAPAQSSPDAR                          | S526        | 0.3418544  | 0.75353411 | 0.6785859  |
| O95365 | ZBTB7A   | AGAAAAGDSDEESRADDK                                 | S337        | 0.36505495 | 4.05906951 | 0.69618384 |
| O95365 | ZBTB7A   | GGAPDPSPGATATPGAPAQSSPDAR                          | S525        | 0.46812543 | 0.79287562 | 0.74813177 |
| O95365 | ZBTB7A   | DEDEDEDVSPDGLGR                                    | S549        | 0.49908447 | 0.94275802 | 0.76461161 |
| O95365 | ZBTB7A   | HFKDEDEDEDVSPDGLGR                                 | S549        | 0.63349    | 1.19770445 | 0.84223531 |
| O75152 | ZC3H11A  | VESSENVSPTHPPVVINAADDEDDDDQFSEEGDETK               | S171        | 0.36904595 | 1.23575811 | 0.70065836 |
| O75152 | ZC3H11A  | VQQSESSTSPSQHEATPGAR                               | S495        | 0.39444504 | 0.90524513 | 0.71403973 |
| O75152 | ZC3H11A  | RLSSASTGKPLSVEDDFEK                                | S758,S759   | 0.45918093 | 0.70891567 | 0.74160036 |
| O75152 | ZC3H11A  | RLSSASTGKPLSVEDDFEK                                | S758,S761   | 0.496623   | 0.86645786 | 0.76446134 |
| O75152 | ZC3H11A  | RLSSASTGKPLSVEDDFEK                                | S761        | 0.7233877  | 1.14345638 | 0.89157396 |
| Q5T200 | ZC3H13   | GNIETSEDGQVFSFK                                    | S993        | 0.1683234  | 0.58139535 | 0.56312413 |
| Q5T200 | ZC3H13   | LISDSVER                                           | S1364       | 0.18905783 | 0.56015943 | 0.57509931 |
| Q5T200 | ZC3H13   | KEVSPVVR                                           | S198        | 0.35037105 | 8.58078217 | 0.68418829 |
| Q5T200 | ZC3H13   | TSAVSSPLDQQR                                       | S242        | 0.45957573 | 1.08650875 | 0.74160036 |
| Q5T200 | ZC3H13   | SERTSELEGDESK                                      | S1438       | 0.57525549 | 1.19000511 | 0.81432655 |
| Q5T200 | ZC3H13   | GPRTPSPPPPEDIAIGK                                  | T263,S265   | 0.60034186 | 0.90085288 | 0.8258728  |
| Q5T200 | ZC3H13   | SLSPSHLTDR                                         | S877        | 0.78619718 | 1.04029584 | 0.92039443 |
| Q6PJ7  | ZC3H14   | NGDECAYHHHPISPK                                    | S620        | 0.70255677 | 0.92230576 | 0.87693402 |
| Q6PJ7  | ZC3H14   | DLVQDPKPAASK                                       | S515        | 0.81494717 | 0.97765118 | 0.92952506 |
| Q8WU90 | ZC3H15   | AENGERSDLEEDNER                                    | S381        | 0.35163593 | 0.69615647 | 0.68418829 |
| Q86VM9 | ZC3H18   | DSGSDQDLGAGVRASDLEDEESAAR                          | S46         | 0.01011633 | 0.71632048 | 0.37254089 |
| Q86VM9 | ZC3H18   | GPSQEEEDNHSDEEDRASEPK                              | S67         | 0.07173936 | 0.80845709 | 0.49571338 |
| Q86VM9 | ZC3H18   | GPSQEEEDNHSDEEDRASEPK                              | S67,S74     | 0.15995164 | 0.79769033 | 0.55746307 |
| Q86VM9 | ZC3H18   | SQDQDSEVNELSR                                      | S78         | 0.43970555 | 0.78984933 | 0.7347627  |
| Q86VM9 | ZC3H18   | ASDLEDEESAAR                                       | S46         | 0.46682593 | 0.73865815 | 0.74744236 |
| Q86VM9 | ZC3H18   | TSDLRDEASSVTR                                      | S118        | 0.61398893 | 0.86950294 | 0.83347439 |
| Q86VM9 | ZC3H18   | GPTSSPCEEDEGEEDR                                   | S95         | 0.71710858 | 0.90338009 | 0.88806482 |
| Q86VM9 | ZC3H18   | LGVSVSPSR                                          | S534        | 0.73594279 | 1.03262072 | 0.8976557  |
| Q86VM9 | ZC3H18   | KLGVSVSPSR                                         | S532,S534   | 0.75918716 | 0.88779341 | 0.90862076 |
| Q86VM9 | ZC3H18   | SQDQDSEVNELSR                                      | S83         | 0.83329268 | 0.96882879 | 0.93848641 |
| Q9UPT8 | ZC3H4    | ALPTSKPEGLSHSSVPGPSSK                              | S904,S907   | 0.10435501 | 0.64824046 | 0.52476522 |
| Q9UPT8 | ZC3H4    | TGSGSPFAGNSPAREGEQDAASLK                           | S1269,S1275 | 0.32891377 | 1.21266491 | 0.67347148 |
| Q9UPT8 | ZC3H4    | TGSGSPFAGNSPAREGEQDAASLK                           | T1265,S1275 | 0.39975482 | 1.28171701 | 0.7160132  |
| Q9UPT8 | ZC3H4    | TGSGSPFAGNSPAR                                     | S1269,S1275 | 0.62488807 | 0.90978677 | 0.8384421  |
| Q7Z2W4 | ZC3HAV1  | ASLEDAPVDLSTR                                      | S284        | 0.1166526  | 0.51781911 | 0.53343618 |
| Q7Z2W4 | ZC3HAV1  | SCTPSPDQISHR                                       | T273,S275   | 0.15483846 | 0.61255995 | 0.55688781 |
| Q7Z2W4 | ZC3HAV1  | TVFSPTLPAAR                                        | S378        | 0.49103526 | 0.72504518 | 0.76263004 |
| Q86WB0 | ZC3HC1   | SWDSSSPVDRPEPEEASPTTR                              | S359,S370   | 0.03545097 | 0.52534965 | 0.43874459 |
| Q86WB0 | ZC3HC1   | DTSATSQVNSGQAQPSLESTSK                             | S62         | 0.03751399 | 1.34610023 | 0.44815912 |
| Q86WB0 | ZC3HC1   | SWDSSSPVDRPEPEEASPTTR                              | S359        | 0.05316483 | 0.78437095 | 0.46689115 |
| Q86WB0 | ZC3HC1   | SQDATFSPGSEQAEK                                    | S335        | 0.14783434 | 0.79401833 | 0.55352644 |
| Q86WB0 | ZC3HC1   | TRSWDSSSPVDRPEPEEASPTTR                            | S354        | 0.23730888 | 1.43403257 | 0.6080317  |
| Q86WB0 | ZC3HC1   | SMGTGDTPLGLEVPSSPLRK                               | S395        | 0.91140455 | 1.06455776 | 0.9669909  |
| Q5VYS8 | ZCCHC6   | NSPVDQSDFFYEFK                                     | S939        | 0.2012994  | 1.51874546 | 0.582095   |
| Q5VYS8 | ZCCHC6   | KDSFQENEDGYR                                       | S132        | 0.27174115 | 0.85735586 | 0.6366507  |
| Q6NZY4 | ZCCHC8   | SEAGHASSPDSEVTSCLQK                                | S598        | 0.18746618 | 1.26487252 | 0.57474321 |
| Q9NUE0 | ZDHHHC18 | DCEVQQISPGAAPLSPGAR                                | S19         | 0.14934001 | 0.692031   | 0.55363509 |
| Q9COB5 | ZDHHHC5  | GVGSEPEGPATAPYLGR                                  | S621        | 0.26785391 | 0.83292486 | 0.63502787 |
| Q9COB5 | ZDHHHC5  | GDSLKEPTSAIESSR                                    | S380        | 0.86673234 | 0.93494823 | 0.95368249 |
| P37275 | ZEB1     | NNDQPQSANANEPQDSTVNLQSPK                           | S679        | 0.01786404 | 0.59197201 | 0.41830815 |
| O60293 | ZFC3H1   | LDSSPVSSPR                                         | S949        | 0.15098925 | 0.73410729 | 0.55675266 |
| Q96KR1 | ZFR      | RDSGDVGDGFEAEK                                     | S1054       | 0.17700992 | 0.7324269  | 0.56898248 |
| Q96K21 | ZFYVE19  | LPDSDDEDEETAIQR                                    | S354        | 0.69371061 | 1.07105416 | 0.87209451 |
| Q9H1K0 | ZFYVE20  | TRSLDFR                                            | S548        | 0.09424238 | 1.48655268 | 0.51670111 |
| Q9UKY1 | ZHX1     | EEAGTSPADESAPK                                     | S648        | 0.66603666 | 0.9226702  | 0.85814824 |

|        |         |                                       |           |            |            |            |
|--------|---------|---------------------------------------|-----------|------------|------------|------------|
| Q14202 | ZMYM3   | TGSPGPELLFHGGQK                       | S464      | 0.12730404 | 0.70144989 | 0.5403576  |
| Q5VZL5 | ZMYM4   | VTQHESDNENIEIQNK                      | S122      | 0.1722378  | 0.92469532 | 0.56561687 |
| Q5VZL5 | ZMYM4   | VTQHESDNENIEIQNK                      | T118      | 0.23275964 | 0.78106332 | 0.6080317  |
| Q5VZL5 | ZMYM4   | RVTQHESDNENIEIQNK                     | S122      | 0.76975881 | 1.07627999 | 0.91329931 |
| Q9H2Y7 | ZNF106  | ELSTSPCNPIVR                          | S641      | 0.05314744 | 0.58761867 | 0.46689115 |
| Q9H2Y7 | ZNF106  | EPHSPADQPEQQAESTLTSATR                | S1328     | 0.4790103  | 0.88492786 | 0.75541886 |
| Q9UQR1 | ZNF148  | GGLLTSEEDSGFSTSPK                     | S306      | 0.00846621 | 0.72131822 | 0.35749468 |
| O15231 | ZNF185  | GGQGDPAVPTQQPADPSTPEQQNSPSGSEQFVR     | T513,S519 | 0.22552645 | 0.73533007 | 0.6080317  |
| O15231 | ZNF185  | RESCGSSVLTDFEGK                       | S465      | 0.31411958 | 1.14189514 | 0.66321511 |
| O15231 | ZNF185  | RSSTSGDEEEEEEEVVPFSSDEQK              | T158      | 0.40307409 | 1.11714564 | 0.7160132  |
| O15231 | ZNF185  | GGQGDPAVPTQQPADPSTPEQQNSPSGSEQFVR     | S519      | 0.40555382 | 0.73774168 | 0.7160132  |
| O15231 | ZNF185  | GGQGDPAVPAQQPADPSTPER                 | T447      | 0.51268883 | 0.88573376 | 0.77273537 |
| O15231 | ZNF185  | GGQGDPAVPAQQPADPSTPERQSSPSGSEQLVR     | S446,S453 | 0.62580577 | 0.8868185  | 0.8387339  |
| O15231 | ZNF185  | RSSTSGDEEEEEEEVVPFSSDEQK              | S152,S153 | 0.65054504 | 0.89893211 | 0.84963106 |
| O15231 | ZNF185  | QSSPSGSEQLVR                          | S453      | 0.84769884 | 0.96695887 | 0.9453218  |
| O15231 | ZNF185  | RESCGSSVLTDFEGK                       | S468      | 0.8802514  | 1.01936799 | 0.95724213 |
| O15231 | ZNF185  | GGQGDPAVPTQQPADPSTPEQQNSPSGSEQFVR     | T513      | 0.9405818  | 1.02677731 | 0.97922223 |
| O75362 | ZNF217  | AGAESPTMSVDGR                         | S407      | 0.55188802 | 0.91592659 | 0.79722272 |
| Q8ND82 | ZNF280C | SEPHSPGIPEIFR                         | S80       | 0.46297183 | 0.77296621 | 0.74438607 |
| Q5VUA4 | ZNF318  | LGSPVDNLEDMDRDLTDDSVFTR               | S173      | 0.40267006 | 1.62219453 | 0.7160132  |
| Q5BKZ1 | ZNF326  | GENPFEIQDHSQQIEGDEEDEEK               | S478      | 0.07105722 | 1.32943677 | 0.49571338 |
| Q9H4Z2 | ZNF335  | THCVGDSQSSASSPPATSK                   | S992      | 0.60329349 | 0.94438157 | 0.82778596 |
| Q9NWS9 | ZNF446  | TEEPLGSPHPSGTVESPGEGPQDTR             | S137      | 0.31803872 | 1.18320838 | 0.66720337 |
| Q9NWS9 | ZNF446  | TEEPLGSPHPSGTVESPGEGPQDTR             | S137,S146 | 0.32851264 | 1.21402586 | 0.67305029 |
| Q8N8L2 | ZNF491  | LISFR                                 | S257      | 0.41978474 | 0.69019464 | 0.72466666 |
| Q8TCN5 | ZNF507  | LSPTSNTSYSLEK                         | S884      | 0.13449488 | 0.79165278 | 0.5475768  |
| Q8N815 | ZNF511  | SPASAEAPGDSGERSEGEAMEICSEPVAASPAPAGER | S199      | 0.44452874 | 0.72851021 | 0.73811209 |
| Q96KM6 | ZNF512B | SEHTAPPPPEPTDKSPEADPLGVER             | S665      | 0.75587601 | 1.09150025 | 0.90833103 |
| Q8N8E2 | ZNF513  | DSEGLSLGARPGPLPYGLSDDES GGGR          | S85       | 0.12648403 | 1.69389517 | 0.5403576  |
| Q9HCE3 | ZNF532  | AADKSPESQNLIDGTK                      | S314      | 0.45119115 | 1.1829513  | 0.73811209 |
| Q8NAF0 | ZNF579  | ESESEAEAGAELR                         | S196      | 0.29068668 | 0.57937721 | 0.65205353 |
| Q92610 | ZNF592  | RLGAPAPEDDGGHNDHSQPQASQDQDSHTLSPQV    | S1264     | 0.85816056 | 1.04810592 | 0.95032314 |
| Q92610 | ZNF592  | LLGAPAPEDDGGHNDHSQPQASQDQDSHTLSPQV    | S1264     | 0.90767781 | 1.03953682 | 0.96679277 |
| O15014 | ZNF609  | TNSMGSATGPLPGTK                       | S467      | 0.03595948 | 0.63252675 | 0.43916474 |
| O15014 | ZNF609  | RGSQNSSEHRPPASSTSEDVK                 | S413      | 0.14598513 | 0.81207675 | 0.55352644 |
| O15014 | ZNF609  | NCPSPVLIDCPHPNCNK                     | S491      | 0.2519021  | 0.72514383 | 0.61962985 |
| O15014 | ZNF609  | LVEPHSPSPSSK                          | S576      | 0.34533945 | 0.84289618 | 0.68023038 |
| Q14966 | ZNF638  | QSSVTQVTEQSPK                         | S128      | 0.03793969 | 0.73766373 | 0.44815912 |
| Q8N1G0 | ZNF687  | QESCSPHHPQVLAQQGSGSSPK                | S242,S227 | 0.1627455  | 0.73621228 | 0.55797736 |
| Q9H5H4 | ZNF768  | SPGLVPPSPPEFAPR                       | S90,S97   | 0.29435605 | 0.71591343 | 0.6555018  |
| Q9H5H4 | ZNF768  | FEPESPGFESR                           | S83       | 0.36153437 | 0.93113343 | 0.692567   |
| Q9H5H4 | ZNF768  | YEPQSPGYEPR                           | S125      | 0.41805389 | 0.86783285 | 0.72427252 |
| O95218 | ZRANB2  | ENVEYIEREESDGEYDFGR                   | S120      | 0.05004964 | 1.23741475 | 0.45652016 |
| O95218 | ZRANB2  | YNLDASEEDSNKK                         | S188      | 0.10907619 | 1.29638702 | 0.53337143 |
| O95218 | ZRANB2  | YNLDASEEDSNK                          | S188      | 0.81061823 | 1.03306452 | 0.92741413 |
| O95218 | ZRANB2  | EVEDKESEGEEDDEDLSK                    | S153      | 0.94555072 | 1.01268882 | 0.98175359 |
| Q15696 | ZRSR2   | DIYLSPDR                              | S349      | 0.77049438 | 1.05334941 | 0.91329931 |
| A7E2V4 | ZSWIM8  | GWGSPGRPK                             | S1130     | 0.47584272 | 1.17096093 | 0.75249201 |
| Q15942 | ZYX     | FSPGAPGSGSQPNQK                       | S281      | 0.00298909 | 0.55732484 | 0.27314524 |
| Q15942 | ZYX     | SPGAPGPLTLK                           | S344      | 0.40522888 | 0.78573467 | 0.7160132  |
| O43149 | ZZEF1   | GDREEVERPVSSPGDPEQK                   | S2443     | 0.91017619 | 0.98343232 | 0.9669909  |
| Q8IYH5 | ZZZ3    | QTEPVSPVLK                            | S113      | 0.04486078 | 0.37579748 | 0.45441331 |

### H358 Cell Line, Treated with DMSO vs. 20uM TRC-794 for 12hrs

Protein Uniprot ID for the parent protein  
 Gene HUGO gene name for the parent protein  
 Peptide identified phosphopeptide fragment  
 Phosphosite(s) specific phosphorylated residues from the peptide  
 p p-value (unadjusted) from Welch's 2-tailed t-test  
 FC mean fold change: TRC-794/DMSO  
 p.adj p-value adjusted for multiple hypothesis testing using the Benjamini-Hochberg method

| Protein | Gene   | Peptide                                           | Phosphosite(s) | p          | FC         | p.adj      |
|---------|--------|---------------------------------------------------|----------------|------------|------------|------------|
| Q9NRG9  | AAAS   | FSPVLGR                                           | S495           | 0.05395731 | 1.28095537 | 0.44632378 |
| Q2M2I8  | AAK1   | VGSLTPSSPK                                        | T620,S624      | 0.18761363 | 1.26357119 | 0.56058734 |
| Q9NY61  | AATF   | AGDRNSEDGVMVMTFSSVK                               | S203           | 0.21222678 | 0.48407789 | 0.57824627 |
| O15439  | ABCC4  | DNEESEQPPVGPPTLR                                  | T646           | 0.62509164 | 0.9486748  | 0.82174981 |
| Q8NE71  | ABCF1  | KAEQSEEEEGEGEEEEEGGESK                            | S228           | 0.09791702 | 1.13125536 | 0.5018786  |
| Q8NE71  | ABCF1  | QQPPEPEWIGDGESTSPSDK                              | T21            | 0.16463782 | 1.18337596 | 0.54196083 |
| Q8NE71  | ABCF1  | NQDEESQEAPELLK                                    | S595           | 0.36515193 | 1.64454194 | 0.67336704 |
| Q8NE71  | ABCF1  | AVSEEQPALK                                        | S166           | 0.43202417 | 1.11360634 | 0.71692899 |
| Q8NE71  | ABCF1  | QQPPEPEWIGDGESTSPSDK                              | S22            | 0.69387531 | 0.93215587 | 0.85860808 |
| Q8NE71  | ABCF1  | AEQSEEEEGEGEEEEEGGESK                             | S228           | 0.9916003  | 0.99728584 | 0.99498584 |
| Q9NYB9  | ABI2   | NMAPSQQSPVR                                       | S227           | 0.69449641 | 1.06536585 | 0.85873722 |
| P00519  | ABL1   | GQGESDPLDHEPAVSPLLPR                              | S569           | 0.40067984 | 0.8486206  | 0.69644028 |
| P42684  | ABL2   | DKSPSSLLEDAK                                      | S631           | 0.13057063 | 1.40644368 | 0.5125107  |
| P42684  | ABL2   | SNSTSSMSSGLPEQDR                                  | S781           | 0.4047329  | 0.8828091  | 0.6993632  |
| P42684  | ABL2   | SPSSLLEDAK                                        | S631           | 0.86696547 | 0.98671391 | 0.94208744 |
| O14639  | ABLIM1 | TLSPTSAEGYQDVR                                    | S431           | 0.32804971 | 1.06654595 | 0.648461   |
| O14639  | ABLIM1 | SSGREEDDEELLR                                     | S587           | 0.61771622 | 0.95353749 | 0.81837121 |
| O94929  | ABLIM3 | QGMSPTFSR                                         | S388           | 0.21532571 | 1.20284698 | 0.58136831 |
| O94929  | ABLIM3 | ASSPGYIDSPITYSR                                   | S372           | 0.96333835 | 0.995637   | 0.98250904 |
| Q13085  | ACACA  | SSMSGHLHLVK                                       | S80            | 0.70099716 | 1.08191882 | 0.86274503 |
| Q96AP0  | ACD    | ELILGETPSSPR                                      | S111           | 0.15875155 | 0.74212531 | 0.54012266 |
| Q9UKV3  | ACIN1  | TTSPLLEEEER                                       | S365           | 0.06235163 | 1.15896188 | 0.45817252 |
| Q9UKV3  | ACIN1  | GVPAGNSDTEGGQPR                                   | S838           | 0.08976728 | 1.21212121 | 0.4960359  |
| Q9UKV3  | ACIN1  | GVPAGNSDTEGGQPR                                   | S838           | 0.10985231 | 1.8159055  | 0.51002233 |
| Q9UKV3  | ACIN1  | ASLVALPEQTASEEETPPPLTK                            | S410           | 0.67603546 | 0.85648498 | 0.85001908 |
| Q9UKV3  | ACIN1  | LSEGSQAEEEEEDQETPSR                               | S240           | 0.72315121 | 0.94621888 | 0.87410666 |
| Q9UKV3  | ACIN1  | LSEGSQAEEEEEDQETPSR                               | S243           | 0.75892817 | 0.9601108  | 0.88966056 |
| Q9UKV3  | ACIN1  | TAQVPSPRR                                         | S1004          | 0.88316848 | 0.98709514 | 0.94748969 |
| Q9UKV3  | ACIN1  | SLSPGVSR                                          | S657           | 0.92707542 | 0.98915401 | 0.96756561 |
| Q9NR19  | ACSS2  | SWSPPPEVSR                                        | S30            | 0.0981322  | 1.27390091 | 0.5018786  |
| P60709  | ACTB   | SYELPDGQVITIGNER                                  | S239           | 0.15694321 | 0.61587376 | 0.53741649 |
| O43707  | ACTN4  | FAIQDISVEETSAK                                    | S159           | 0.67714736 | 0.92488381 | 0.8501977  |
| P78536  | ADAM17 | SFEDLDHPVTR                                       | S791           | 0.96223125 | 1.00691324 | 0.98250904 |
| Q13443  | ADAM9  | HVSPVTPPR                                         | T761,S758      | 0.17011418 | 0.86065528 | 0.54531589 |
| Q13443  | ADAM9  | HVSPVTPPR                                         | T761           | 0.94861377 | 0.99125993 | 0.9788835  |
| P55265  | ADAR   | TAESQTPPTSATSFSGK                                 | T601           | 0.82557145 | 1.06816293 | 0.92458845 |
| P35611  | ADD1   | EEEEAHRPPSPTAETASPEAPDPAPVAEEAAPSVEEAAADPGSDGSPGK | S669,S710      | 0.29063528 | 0.54464137 | 0.62187612 |
| P35611  | ADD1   | EEEEAHRPPSPTAETASPEAPDPAPVAEEAAPSVEEAAADPGSDGSPGK | S678           | 0.49340097 | 0.72277469 | 0.74837624 |
| P35611  | ADD1   | SPGSPVGEETGSPPK                                   | S358           | 0.85804744 | 0.98630819 | 0.93832578 |
| Q9UEY8  | ADD3   | IEEVLSPFEGSPSK                                    | S673           | 0.12335929 | 0.76105439 | 0.5125107  |
| Q9H2P0  | ADNP   | LMHNASDSEVDQDDVVEWK                               | S955           | 0.43867648 | 0.71759731 | 0.71992276 |
| P35368  | ADRA18 | HDSGPLFTFK                                        | S470           | 0.00487358 | 0.76500495 | 0.29204389 |
| P07550  | ADRB2  | FHVQNLQVEQDGR                                     | S246           | 0.13788184 | 0.43238796 | 0.52409548 |
| Q6ZNI8  | AEBP2  | RGSLEMSSDGEPLSR                                   | S206           | 0.3033714  | 0.89112534 | 0.63144863 |
| Q8N556  | AFAP1  | SGTSSPQSPVFR                                      | S668           | 0.03837089 | 0.8506545  | 0.43108921 |
| Q8N556  | AFAP1  | LSSERPSSDGEVVENGITTGNK                            | S282           | 0.13088423 | 0.52886683 | 0.5125107  |
| Q8N556  | AFAP1  | TLENSPISCDTSDTEGVPVNSAAVLK                        | S687           | 0.14402979 | 0.62034631 | 0.52860081 |
| Q8N556  | AFAP1  | KLSSERPSSDGEVVENGITTGNK                           | S277,S283      | 0.67765366 | 0.94279508 | 0.85029587 |
| Q8N556  | AFAP1  | EAYSGCSGPVDSCECPSPSPVHK                           | S264           | 0.84383796 | 1.026534   | 0.93162946 |
| Q9UHB7  | AFF4   | VSPASSVDSNIPSSQGYK                                | S487           | 0.06552199 | 1.19522692 | 0.46184181 |
| Q9UHB7  | AFF4   | MFSPMEEK                                          | S694           | 0.20321367 | 1.19701739 | 0.57104287 |
| Q9UKV8  | AGO2   | SASFNTDPYVR                                       | S387           | 0.0102471  | 0.77384924 | 0.34797246 |
| Q8WYP5  | AHCTF1 | ISFVEEDVHPK                                       | S1232          | 0.02543274 | 0.58060819 | 0.4040435  |
| Q8WYP5  | AHCTF1 | TTSFFLNSPEK                                       | S1283          | 0.17430119 | 0.84694628 | 0.54804644 |
| Q8WYP5  | AHCTF1 | EVSPSDVR                                          | S1944          | 0.20874677 | 1.17453184 | 0.57425546 |
| Q8WYP5  | AHCTF1 | SPLYLVS                                           | S1142          | 0.64700461 | 0.95859286 | 0.83289579 |
| Q8WYP5  | AHCTF1 | EHQEMDEGQSLSLEK                                   | S1297          | 0.94723479 | 1.01205409 | 0.9788835  |
| Q5TGY3  | AHDC1  | AYSPTCSPTLGFK                                     | S1399,S1403    | 0.17672382 | 0.78374125 | 0.55136011 |
| Q5TGY3  | AHDC1  | LASQPQSYAADANDSK                                  | S596           | 0.37477336 | 1.11964874 | 0.67596613 |
| Q5TGY3  | AHDC1  | ANSEASSSEGQSLSLSLEK                               | S1187          | 0.40889407 | 0.84035656 | 0.70127181 |
| Q09666  | AHNAK  | GSEVGFHGAAPDISVK                                  | S5530          | 0.00420646 | 0.37539283 | 0.29204389 |
| Q09666  | AHNAK  | FSMPSLK                                           | S1010          | 0.00686588 | 0.34566303 | 0.31708848 |
| Q09666  | AHNAK  | GDLASVPSMK                                        | S5321          | 0.00695946 | 0.29482909 | 0.31708848 |
| Q09666  | AHNAK  | FGTFGGGLGSK                                       | T5824          | 0.01187929 | 0.45315026 | 0.3634964  |
| Q09666  | AHNAK  | LPSGSGAASPTGSAVDIR                                | S216,S220      | 0.01350001 | 0.57058824 | 0.36591793 |
| Q09666  | AHNAK  | FGTFGGGLGSK                                       | S5830          | 0.01556514 | 0.55044436 | 0.36631449 |
| Q09666  | AHNAK  | LSGPSLK                                           | S4903          | 0.02480718 | 0.34718774 | 0.4040435  |
| Q09666  | AHNAK  | MPEMSIK                                           | S1445          | 0.03913525 | 0.39589789 | 0.43108921 |
| Q09666  | AHNAK  | GGVTGSPASISGSK                                    | S5731          | 0.04676932 | 1.28168421 | 0.44612288 |
| Q09666  | AHNAK  | LQSGVSLASK                                        | S5857          | 0.07373466 | 0.58917127 | 0.47009491 |
| Q09666  | AHNAK  | VDIDTPDIHIGPEGK                                   | T4100          | 0.08326831 | 0.30289011 | 0.49288727 |

|        |         |                                |             |            |            |            |
|--------|---------|--------------------------------|-------------|------------|------------|------------|
| Q09666 | AHNAK   | FSLFK                          | S5769       | 0.09008919 | 0.24793306 | 0.4960359  |
| Q09666 | AHNAK   | MPSLEISAPK                     | S4908       | 0.09940523 | 1.48313099 | 0.5018786  |
| Q09666 | AHNAK   | LQGGVSLASK                     | S5854,S5857 | 0.11592778 | 0.67300434 | 0.51002233 |
| Q09666 | AHNAK   | ASLGSLEGEAEAEASSPK             | S5763       | 0.12443009 | 0.71648794 | 0.5125107  |
| Q09666 | AHNAK   | ISMSEVDLNVAAAPK                | S570        | 0.12619237 | 0.61532698 | 0.5125107  |
| Q09666 | AHNAK   | MPSMNIQTHK                     | S1571       | 0.13825333 | 0.48054958 | 0.52409548 |
| Q09666 | AHNAK   | ASLGSLEGEAEAEASSPK             | S5749       | 0.16659077 | 0.58970787 | 0.54308896 |
| Q09666 | AHNAK   | SEDDVGEVGLGETQSR               | S135        | 0.27370114 | 0.85645356 | 0.60684527 |
| Q09666 | AHNAK   | ASLGSLEGEAEAEASSPK             | S5752,S5763 | 0.28078355 | 0.74438833 | 0.61494075 |
| Q09666 | AHNAK   | LKSEDDVGEVGLGETQSR             | S135        | 0.31981542 | 1.25307557 | 0.64042491 |
| Q09666 | AHNAK   | LPSGSGAASPTGSAVDIR             | S210        | 0.35382439 | 1.44280955 | 0.66702539 |
| Q09666 | AHNAK   | AEAPLPSPK                      | S5110       | 0.38634667 | 0.87366694 | 0.68181311 |
| Q09666 | AHNAK   | ASLGSLEGEAEAEASSPK             | S5752       | 0.42649294 | 0.73221757 | 0.7137923  |
| Q09666 | AHNAK   | GHYEVTGSDDDETQK                | S5841       | 0.46873384 | 0.94450736 | 0.73231082 |
| Q09666 | AHNAK   | ADIDVSGPK                      | S1286       | 0.47012983 | 0.87473666 | 0.73338435 |
| Q09666 | AHNAK   | ISMQDVLDSLGSPPK                | S511        | 0.51639107 | 0.84753655 | 0.75941066 |
| Q09666 | AHNAK   | LPSGSGAASPTGSAVDIR             | S216        | 0.54606037 | 1.19701727 | 0.77473905 |
| Q09666 | AHNAK   | DDGVFVQEVTVQNSPAAR             | S41         | 0.56935477 | 0.8568521  | 0.79101571 |
| Q09666 | AHNAK   | ADLDVSGPK                      | S3054       | 0.72178921 | 0.94396568 | 0.87405855 |
| Q09666 | AHNAK   | APSLDIK                        | S3326       | 0.74150961 | 0.88800508 | 0.88204647 |
| Q09666 | AHNAK   | LPSGSGAASPTGSAVDIR             | S210,S216   | 0.80877067 | 0.97119581 | 0.91703842 |
| Q09666 | AHNAK   | GDRSPEPGQWTWR                  | S93         | 0.95041589 | 1.00631048 | 0.97916383 |
| Q8IVF2 | AHNAK2  | LSTSGFEWSSK                    | S4642       | 0.03037572 | 0.57279679 | 0.40879194 |
| Q8IVF2 | AHNAK2  | ERLSWPK                        | S260        | 0.11698782 | 1.23502825 | 0.51002233 |
| Q8IVF2 | AHNAK2  | SKSTEDGAELEEQK                 | S5712       | 0.26978456 | 1.53222077 | 0.60403212 |
| Q8IVF2 | AHNAK2  | VDMPSFK                        | S1913       | 0.35883759 | 0.80669273 | 0.66991323 |
| Q8IVF2 | AHNAK2  | VEMPSPK                        | S923        | 0.37219259 | 0.83532764 | 0.67479745 |
| Q8IVF2 | AHNAK2  | SKSTEDGAELEEQK                 | S5714       | 0.43239647 | 1.23097583 | 0.7171779  |
| Q8IVF2 | AHNAK2  | LPEGPLPEGASLK                  | S753        | 0.54875358 | 0.90960934 | 0.77746116 |
| Q8IVF2 | AHNAK2  | DAHDVSPSTSDTEAQLTVER           | S294        | 0.59750746 | 0.88727273 | 0.80755237 |
| Q8IVF2 | AHNAK2  | LQMPSPK                        | S1418       | 0.64648791 | 0.91088627 | 0.83256287 |
| Q8IVF2 | AHNAK2  | LPEGPVPEGASLK                  | S4046       | 0.7699722  | 0.92855619 | 0.89575562 |
| Q8IVF2 | AHNAK2  | MPSFGVSAPGK                    | S842        | 0.84557113 | 0.91496541 | 0.93222923 |
| Q8IVF2 | AHNAK2  | SMEDSVDVSAPK                   | S851        | 0.89723371 | 0.95336053 | 0.95621934 |
| P02765 | AHSG    | CDSPDASAEDVRK                  | S138        | 0.77309873 | 1.0521959  | 0.89906867 |
| Q9Y4K1 | AIM1    | STDSPGADAELPESAAR              | T20         | 0.46366254 | 1.06701415 | 0.72929075 |
| Q9Y4K1 | AIM1    | DTCVQSPISFPCTDLK               | S484        | 0.91827785 | 0.97591743 | 0.96556856 |
| Q96IF1 | AJUBA   | HSVTGYGDCAVGAR                 | S263        | 0.0161345  | 0.47536315 | 0.36631449 |
| Q96IF1 | AJUBA   | LEPTAPALSPR                    | S119        | 0.87710207 | 0.98287293 | 0.94565946 |
| Q92667 | AKAP1   | SIPLECLSPSK                    | S151        | 0.33191028 | 0.83402467 | 0.65329016 |
| Q92667 | AKAP1   | SESSGILPNTTDMR                 | S107        | 0.48012371 | 1.14268538 | 1.74052465 |
| Q9UKA4 | AKAP11  | SFSEDFVQSVK                    | S18         | 0.06991817 | 0.59166217 | 0.4637455  |
| Q9UKA4 | AKAP11  | EDSLFSPR                       | S448        | 0.24386555 | 0.77652322 | 0.58932994 |
| Q9UKA4 | AKAP11  | SVSPTFLNPSDENLK                | S1242       | 0.51824123 | 0.91787745 | 0.76061048 |
| Q02952 | AKAP12  | SAESPTSPVTSETGTFK              | S286        | 0.01672662 | 1.44600939 | 0.36631449 |
| Q12802 | AKAP13  | DMAECSTPLPEDCSPTHSPR           | T2400       | 0.01927316 | 1.24461207 | 0.37230658 |
| Q12802 | AKAP13  | SLSRPSSLIEQEK                  | S2563       | 0.09893178 | 0.57024615 | 0.5018786  |
| Q12802 | AKAP13  | SLSPFR                         | S1559       | 0.1126926  | 0.82712726 | 0.51002233 |
| Q12802 | AKAP13  | SGSLDSELSVSPK                  | S2728       | 0.27823581 | 0.85102587 | 0.61249442 |
| Q12802 | AKAP13  | QSPCECNFLDVLGLGR               | S1411       | 0.31820471 | 0.76040187 | 0.6389963  |
| Q12802 | AKAP13  | DEDEGIPSENEEK                  | S2345       | 0.49737294 | 0.87531486 | 0.74981346 |
| Q9Y2D5 | AKAP2   | TLSMIEEIR                      | S720        | 0.08941783 | 0.50237632 | 0.4960359  |
| Q9Y2D5 | AKAP2   | SPGALETPSAAGSQGNTASQGK         | S393        | 0.51511499 | 1.03834116 | 0.75905552 |
| Q9Y2D5 | AKAP2   | QVLQSTQSPR                     | S748        | 0.61560357 | 0.89209165 | 0.81725808 |
| Q9Y2D5 | AKAP2   | DALGDLSLQVPVSPSTSSR            | S152        | 0.6373914  | 1.0787234  | 0.82979203 |
| Q9Y2D5 | AKAP2   | QAPPHIELSNSSPDMAEAEAR          | S121        | 0.69331738 | 0.9655706  | 0.85860808 |
| O43823 | AKAP8   | SGDEEFKGEDELCDGR               | S339        | 0.60997168 | 1.09145674 | 0.81484419 |
| Q96B36 | AKT1S1  | LNTSDFQK                       | T246        | 0.04491317 | 0.68057482 | 0.44308883 |
| Q96B36 | AKT1S1  | SSDEENGPPSSPDLDR               | S212        | 0.54731525 | 1.02172524 | 0.77610505 |
| P04075 | ALDOA   | GILAADESTGSIK                  | S36         | 0.16164624 | 1.19017431 | 0.54196083 |
| P04075 | ALDOA   | GILAADESTGSIK                  | S39         | 0.66921512 | 1.0501139  | 0.84629085 |
| Q92685 | ALG3    | SGSAAQAEGLCK                   | S13         | 0.29026646 | 1.2249467  | 0.62187612 |
| Q6P6C2 | ALKBH5  | SYESSEDCEAAGSPAR               | S371        | 0.05844726 | 1.33861386 | 0.45298462 |
| Q6P6C2 | ALKBH5  | RGFSSENYWR                     | S361        | 0.16452468 | 0.86771845 | 0.54196083 |
| Q6P6C2 | ALKBH5  | GSFSSENYWR                     | S361        | 0.17384743 | 0.77350051 | 0.54778823 |
| Q6P6C2 | ALKBH5  | SYESSEDCEAAGSPAR               | S375        | 0.17845341 | 0.52485228 | 0.55295852 |
| Q6P6C2 | ALKBH5  | YQEDSDPERSDYEQLQK              | S64         | 0.83753255 | 0.94922737 | 0.9284811  |
| Q6P6C2 | ALKBH5  | SYESSEDCEAAGSPAR               | S384        | 0.85860702 | 0.96340038 | 0.93861953 |
| Q9C0C7 | AMBRA1  | LELSSASPQEER                   | S639        | 0.06846238 | 0.72347443 | 0.4637455  |
| Q9C0C7 | AMBRA1  | SSQTGTEPGAHTSSPQPSTSR          | S1205       | 0.14113556 | 0.74721167 | 0.52770768 |
| Q9UKV5 | AMFR    | SDSIRPALNSPVERPSSDQEEGETSAQTER | S523        | 0.0471011  | 0.6569378  | 0.44612288 |
| Q9UKV5 | AMFR    | VPLDLSR                        | S542        | 0.89555863 | 0.97123162 | 0.95506517 |
| Q9Y4X0 | AMMECR1 | LSSPPSGSGGGGASSSSHCSGSEQCR     | S16         | 0.50468436 | 1.04456094 | 0.75314323 |
| Q9Y2J4 | AMOTL2  | QAGAPGGSSGSGSPALSALR           | S540        | 0.85773069 | 1.00794281 | 0.93829746 |
| Q12955 | ANK3    | IHGSGHVEEPASPLAAYQK            | S4298       | 0.69888161 | 0.86332662 | 0.86250653 |
| Q6UB98 | ANKRD12 | DNSPDSTPNHPSQTTPAQK            | S149        | 0.26209338 | 1.13514416 | 0.60088416 |
| Q6UB98 | ANKRD12 | IKDEDHSPTEFNSDCTLK             | S630        | 0.80239156 | 1.05973958 | 0.91398245 |
| O75179 | ANKRD17 | SDNHSPAIVTTVSSK                | S1635       | 0.07975435 | 0.62547816 | 0.48728698 |
| O75179 | ANKRD17 | NSPLDCGSASPNK                  | S2067       | 0.24930394 | 0.86814621 | 0.59442315 |
| O75179 | ANKRD17 | EHYPVSSPSPSPAQPGGVSR           | S2045,S2047 | 0.37811584 | 0.76008635 | 0.67666227 |
| Q92625 | ANKS1A  | SDSLLTCSPTEDATMGSR             | S626        | 0.00772527 | 1.34124294 | 0.31950916 |



|        |           |                            |           |            |            |            |
|--------|-----------|----------------------------|-----------|------------|------------|------------|
| Q92625 | ANKS1A    | SDSLLTCSPTEDATMGSR         | S634      | 0.52629265 | 0.90852676 | 0.76512848 |
| Q9H8Y5 | ANKZF1    | EALGQNEESPK                | S398      | 0.34708695 | 0.880555   | 0.66293814 |
| Q9NQW6 | ANLN      | RCSDNTEVEVSNLENK           | T75       | 0.05009411 | 0.61588745 | 0.44612288 |
| Q9NQW6 | ANLN      | TPISPLK                    | S323      | 0.12069989 | 0.77872082 | 0.51002233 |
| Q9NQW6 | ANLN      | QNSVQEQPGTACLK             | S225      | 0.12565933 | 0.44075757 | 0.5125107  |
| Q9NQW6 | ANLN      | QLPSEASNQPLSGGEEK          | S54       | 0.16213857 | 0.83622126 | 0.54196083 |
| Q9NQW6 | ANLN      | ASPOQSEFMPSK               | S792      | 0.82192989 | 0.95451591 | 0.92458845 |
| P07355 | ANXA2     | LSLEGDHSTPPSAYGSVK         | S26       | 0.02966956 | 0.40863592 | 0.40811311 |
| P07355 | ANXA2     | LSLEGDHSTPPSAYGSVK         | Y24       | 0.58768429 | 1.07277397 | 0.80197527 |
| P07355 | ANXA2     | LSLEGDHSTPPSAYGSVK         | T19       | 0.90096146 | 1.03732727 | 0.95772102 |
| P61966 | AP1S1     | AIEQADLLQEEDESPR           | S147      | 0.18912493 | 1.35889795 | 0.56335829 |
| O00203 | AP3B1     | NFYESDDQK                  | S276      | 0.03588076 | 1.35437654 | 0.42091393 |
| O14617 | AP3D1     | HRPSEADEEELAR              | S658      | 0.48740063 | 0.88745981 | 0.74374863 |
| Q02410 | APBA1     | SNSQENVEASHPSQDGK          | S568      | 0.0680277  | 1.25500687 | 0.4637455  |
| O96018 | APBA3     | SPSGPAMDLLEGPR             | S11       | 0.98565937 | 1.00237457 | 0.99242732 |
| Q92870 | APBB2     | GSLSSVTPSPTENEK            | S334      | 0.01500726 | 2.09971144 | 0.36631449 |
| Q92870 | APBB2     | NAPHDDDDSCSINSDPEAK        | S412      | 0.36818425 | 1.08920188 | 0.67368198 |
| P25054 | APC       | QASSDSDSILSLK              | S2129     | 0.44139437 | 0.93284665 | 0.72100919 |
| P25054 | APC       | SKTPPPPPQTAQTK             | T1438     | 0.94555878 | 1.00594101 | 0.97862451 |
| P13798 | APEH      | ALDVASASDEIAR              | S187      | 0.73603184 | 1.0336063  | 0.87923537 |
| Q9HDC9 | APMAP     | RPLRPQVVTDDGQAPEAK         | T19       | 0.06046217 | 0.76417015 | 0.45466424 |
| Q8WWN8 | ARAP3     | SLDQPFLSK                  | S1444     | 0.22643014 | 1.11559889 | 0.58267075 |
| O15033 | AREL1     | RPSTAVDEEDEDSPSECHTEPK     | S337      | 0.31515666 | 1.14608073 | 0.63800725 |
| P84077 | ARF1      | LGLHSLR                    | S147      | 0.02039819 | 1.35825606 | 0.37949754 |
| P18085 | ARF4      | LGLQSLR                    | S147      | 0.01383819 | 1.65033969 | 0.36591793 |
| Q8N6T3 | ARFGAP1   | SPSSDSWTCADTSTER           | S343      | 3.45E-05   | 2.38634659 | 0.0556485  |
| Q8N6H7 | ARFGAP2   | AISSDMFFGR                 | S432      | 0.53053427 | 1.167751   | 0.76679083 |
| Q8N6H7 | ARFGAP2   | DNPFSLGESFGSR              | S368      | 0.87839384 | 1.01368421 | 0.94568481 |
| Q9NP61 | ARFGAP3   | AISSDMYFGR                 | S428      | 0.29838888 | 1.12360362 | 0.6258794  |
| Q9Y6D6 | ARFGEF1   | LSVSNDDTQESGNSGSPGAK       | S396      | 0.50207575 | 0.92410523 | 0.75168596 |
| Q9Y6D6 | ARFGEF1   | SVDIHDSIQPR                | S1569     | 0.64083257 | 1.06724512 | 0.83055345 |
| Q9Y6D5 | ARFGEF2   | GSSLSGTDDGAQEVVK           | S276      | 0.93119546 | 1.00512517 | 0.96968952 |
| P53367 | ARFIP1    | NSAAEIPVTSNGEVDDREHSFNR    | S24       | 0.02312338 | 1.53087757 | 0.39017457 |
| P53367 | ARFIP1    | KWSLNTYK                   | S132      | 0.02801281 | 1.45796241 | 0.40710444 |
| P53367 | ARFIP1    | WLSLNTYK                   | S132      | 0.19448916 | 1.26813147 | 0.56554204 |
| Q07960 | ARHGAP1   | SSPPELVTHLK                | S51       | 0.07489582 | 0.8167377  | 0.47168775 |
| Q6P4F7 | ARHGAP11A | INSLLEYSR                  | S847      | 0.68072149 | 0.91203411 | 0.85149574 |
| Q6P4F7 | ARHGAP11A | SVSCDGALSSCIESASK          | S875      | 0.75889844 | 0.85181239 | 0.88966056 |
| Q8IWW6 | ARHGAP12  | ATTPPNQGRPDSPVYANLQELK     | T231,S240 | 0.45397672 | 0.8840505  | 0.72537341 |
| Q8IWW6 | ARHGAP12  | TSFSQEQSCDSAGEGSR          | S201      | 0.85597084 | 0.93860621 | 0.93732584 |
| Q6ZUM4 | ARHGAP27  | SSQDGDTPAQASPPPEEK         | S466      | 0.54065382 | 0.91265398 | 0.7718622  |
| Q52LW3 | ARHGAP29  | RSSDSYPLAPVR               | S1144     | 0.03808806 | 0.62301853 | 0.43108921 |
| Q52LW3 | ARHGAP29  | LLLASPPNER                 | S1029     | 0.04291738 | 0.79090909 | 0.44128756 |
| Q52LW3 | ARHGAP29  | EPPSPSETGPNLSLGTK          | S589      | 0.14179007 | 0.72752147 | 0.52817885 |
| Q52LW3 | ARHGAP29  | IEEDRCSNSADITGPSFIR        | S521      | 0.15377484 | 0.60774142 | 0.53741649 |
| Q52LW3 | ARHGAP29  | AEHEHLSGGLAK               | S357      | 0.39659156 | 1.39359699 | 0.69247075 |
| Q52LW3 | ARHGAP29  | SLFFSSK                    | S930      | 0.47183305 | 0.89933871 | 0.73426599 |
| A7KAX9 | ARHGAP32  | DAETGSSQCQTPGSTASSEPVSPLEK | S856      | 0.05358919 | 1.18682022 | 0.44612288 |
| A7KAX9 | ARHGAP32  | SEESLTLHAVDGDGSK           | S706      | 0.44375005 | 0.94365139 | 0.72238826 |
| Q9NRY4 | ARHGAP35  | NSLSDPNIDR                 | S589      | 0.19699452 | 0.82150538 | 0.56846559 |
| Q9NRY4 | ARHGAP35  | TSFSVGSDDDELGPPIR          | S1179     | 0.42073829 | 0.87907237 | 0.70988583 |
| Q9NRY4 | ARHGAP35  | AQSNNGSNGSDSEMDTSSLER      | S1134     | 0.53860708 | 1.12749917 | 0.77155703 |
| Q9C0H5 | ARHGAP39  | KPSSETDIENWASK             | S690      | 0.01342941 | 1.32539142 | 0.36591793 |
| Q13017 | ARHGAP5   | GGIDNPAITSDQELDDK          | S1218     | 0.09070021 | 0.8501565  | 0.49699004 |
| Q13017 | ARHGAP5   | HRGSEEDPLSPVETWK           | S1195     | 0.16672838 | 0.46992673 | 0.54308896 |
| Q13017 | ARHGAP5   | ESTHQSEDVFLPSR             | S968      | 0.5011814  | 0.89545673 | 0.75168596 |
| Q13017 | ARHGAP5   | GSEEDPLSPVETWK             | S1202     | 0.50681449 | 0.96320612 | 0.75314323 |
| Q13017 | ARHGAP5   | GGIDNPAITSDQELDDK          | S1218     | 0.81510988 | 1.04050992 | 0.91990355 |
| Q92888 | ARHGEF1   | DGDGVPGGGPLSPAR            | S863      | 0.63166468 | 0.94283277 | 0.82494403 |
| Q9NZN5 | ARHGEF12  | SETIQDITDQSLVSGPSTR        | S341      | 0.78681744 | 1.02368757 | 0.90717408 |
| Q5VV41 | ARHGEF16  | GLNTSQESDDILDSSSPEGTQK     | S227      | 0.75949323 | 0.96825194 | 0.88966056 |
| Q96PE2 | ARHGEF17  | RPSADSESPGTPSPDGAAWPEPPAR  | S145      | 0.29763429 | 1.1913943  | 0.62494294 |
| Q96PE2 | ARHGEF17  | SPSFGAGEGLLR               | S420      | 0.56176106 | 0.91551595 | 0.78554018 |
| Q96PE2 | ARHGEF17  | RPSADSESPGTPSPDGAAWPEPPAR  | S142      | 0.59548025 | 1.09172161 | 0.80681197 |
| Q6ZS25 | ARHGEF18  | RAETFAGYDCTNSPTK           | T735      | 0.86778365 | 1.02800991 | 0.94208744 |
| Q92974 | ARHGEF2   | EPALPLEPDSGGNTSPGVTANGEAR  | S696      | 0.05092714 | 1.31428571 | 0.44612288 |
| Q92974 | ARHGEF2   | LQDSSDPDTGSEEEGSSRLSPHSPR  | S952      | 0.08461934 | 1.76178011 | 0.49347121 |
| Q92974 | ARHGEF2   | LQDSSDPDTGSEEEGSSR         | S941      | 0.20301965 | 1.51658725 | 0.57100381 |
| Q92974 | ARHGEF2   | ILSQSTDLSLNMNR             | S174      | 0.42761783 | 0.81791796 | 0.7137923  |
| Q92974 | ARHGEF2   | QELGSPEER                  | S932      | 0.57361024 | 1.07813164 | 0.79453269 |
| Q96DR7 | ARHGEF26  | SPLLLGAQR                  | S80       | 0.01844059 | 0.70206826 | 0.37230658 |
| Q96DR7 | ARHGEF26  | AVVSGGDFDSTSSK             | S333      | 0.32923333 | 0.82440481 | 0.64960655 |
| A5YM69 | ARHGEF35  | YVSPCEEHPAETNQNEGAESGTIR   | S184      | 0.9786076  | 1.00337838 | 0.98996178 |
| Q12774 | ARHGEF5   | RDSGRPPGDSGQAVAPSEGANK     | S1011     | 0.0594616  | 0.81545999 | 0.45298462 |
| Q12774 | ARHGEF5   | AEELSPAALSPLSEPIR          | S450      | 0.36354475 | 0.73956585 | 0.67208904 |
| Q15052 | ARHGEF6   | MSGFIYQGK                  | S488      | 0.12728646 | 0.76664891 | 0.5125107  |
| O14497 | ARID1A    | HVTTAEGTPTGTTDQEGPPDPGPEK  | T1891     | 0.05927546 | 1.2425     | 0.45298462 |
| O14497 | ARID1A    | VSSPAPMEGEGEEELLGPK        | S1755     | 0.22109536 | 1.29006318 | 0.58267075 |
| Q66PJ3 | ARL6IP4   | SAGEEEDGPVLTDEQK           | S271      | 0.71344082 | 0.97388724 | 0.86856453 |
| Q8N2F6 | ARMC10    | SAGALEEGTSEGQLCGR          | S45       | 0.02686602 | 1.68265023 | 0.40703825 |
| Q9UH62 | ARMCX3    | YNDWSDDDDSNESK             | S61       | 0.73818862 | 1.08352673 | 0.88004305 |

|        |          |                                   |             |            |            |            |
|--------|----------|-----------------------------------|-------------|------------|------------|------------|
| O15143 | ARPC1B   | KASSEGGTAAGAGLDSLHK               | S310        | 0.8243945  | 1.03995794 | 0.92458845 |
| P56211 | ARPP19   | YFDSGDYNNMAK                      | S62         | 0.19902704 | 0.87258687 | 0.56975265 |
| P49407 | ARRB1    | DDKEEEEDGTGSPQLNNR                | S412        | 0.35204281 | 1.19008265 | 0.66702539 |
| P49407 | ARRB1    | EEEEEDGTGSPQLNNR                  | S412        | 0.90161152 | 0.95065554 | 0.95772102 |
| Q9ULH1 | ASAP1    | QEEIDESDDDDKPKSPIK                | S717        | 0.9141651  | 0.98631309 | 0.96462519 |
| Q9UBL3 | ASH2L    | DTLEGAGDTSEVMDTQAGSVDEENGR        | S101        | 0.10897552 | 1.21542228 | 0.51002233 |
| O95671 | ASMTL    | HDSIPAADTFEDLSDVGGGSEPTQR         | S239        | 0.25031052 | 0.46182768 | 0.59462574 |
| Q9BZE9 | ASPSCR1  | AAGSPSPLPAPDPAPK                  | S502        | 0.56766156 | 1.05683948 | 0.79002425 |
| Q76L83 | ASXL2    | KSSLTQEEAPVSWEK                   | S571        | 0.7534742  | 1.07127158 | 0.88807985 |
| Q6PL18 | ATAD2    | IESDTEETQDTSVDHNETGNTGESSVEENEK   | S1200,S1222 | 0.09385036 | 0.51747027 | 0.5018786  |
| Q6PL18 | ATAD2    | IESDTEETQDTSVDHNETGNTGESSVEENEK   | S1200       | 0.1792419  | 0.74962756 | 0.55295852 |
| Q96QE3 | ATAD5    | QFEMENSLDPENEQTVQK                | S356        | 0.11419106 | 0.79029712 | 0.51002233 |
| Q96QE3 | ATAD5    | AADPVPSFDESSQDTSEK                | S817        | 0.52456103 | 0.8530987  | 0.76426492 |
| Q676U5 | ATG16L1  | SVSSFPVQDNVDTHPGSGK               | S287        | 0.554834   | 0.85284511 | 0.78182069 |
| Q96BY7 | ATG2B    | SSPVCSTAPVETEPK                   | S240        | 0.36877121 | 1.08487486 | 0.67368198 |
| Q7Z3C6 | ATG9A    | RESDESGESAPDEGGEGAR               | S735        | 0.37283824 | 1.10682545 | 0.67495398 |
| Q6DD88 | ATL3     | DAVVGRRPSMDK                      | S535        | 0.00923165 | 1.61441344 | 0.33303827 |
| P54259 | ATN1     | SEEISEESEETNAPK                   | S77         | 0.2664523  | 1.18296261 | 0.60355868 |
| Q9Y2G3 | ATP11B   | SWSASDPFYTNR                      | S1154       | 0.11503796 | 1.33988018 | 0.51002233 |
| Q8NB49 | ATP11C   | TFSDENVL                          | S1126       | 0.85290697 | 0.97680806 | 0.93587683 |
| Q9HD20 | ATP13A1  | DRLSQVLR                          | S935        | 0.00115617 | 7.40935573 | 0.22363976 |
| Q9H7F0 | ATP13A3  | LVHDSLEDLQMTR                     | S817        | 0.09977371 | 0.82119205 | 0.5018786  |
| P16615 | ATP2A2   | EFDELNPSAQR                       | S663        | 0.16328562 | 1.19336493 | 0.54196083 |
| P20020 | ATP2B1   | IEDSEPHILIDDTAEDDAPT              | S1193       | 0.0382439  | 0.47463415 | 0.43108921 |
| Q01814 | ATP2B2   | SATSSSPGSPHISLETSL                | S1242       | 0.70131062 | 0.91741107 | 0.86274503 |
| Q13535 | ATR      | GVELCFPENETPPEGK                  | T1989       | 0.95423668 | 0.99136563 | 0.98099666 |
| Q8WXE1 | ATRIP    | LSGDGMTSALR                       | S518        | 0.23389837 | 1.37581239 | 0.58492724 |
| P46100 | ATRX     | EVIEIEDASPTK                      | S1527       | 0.17041955 | 0.83818551 | 0.54531589 |
| P46100 | ATRX     | RPTETNPVTSNSDEECNETVK             | S677        | 0.21491925 | 1.13238771 | 0.58136831 |
| P46100 | ATRX     | ETFSSAEGTVDK                      | S889        | 0.54097348 | 1.06001188 | 0.7718622  |
| Q99700 | ATXN2    | ENIKPNETSFSFK                     | S772        | 0.25239014 | 1.2763864  | 0.59589813 |
| Q8WWM7 | ATXN2L   | GPPQSPVFEVYNNR                    | S111        | 0.32755615 | 1.10723383 | 0.64788237 |
| Q8WWM7 | ATXN2L   | EDKPPPLAPSGGTGEPQPPPCPSQTGSPVGLIK | T632        | 0.38719807 | 0.59359048 | 0.68256883 |
| Q8WWM7 | ATXN2L   | EVDGLLTSEPMGSPVSSK                | S594        | 0.56877266 | 1.08209806 | 0.79054743 |
| Q14CW9 | ATXN7L3  | LQWVDGSSDLSPSDSGSSK               | S281        | 0.924292   | 1.00831949 | 0.9674776  |
| Q9NWW8 | BABAM1   | SEGEGEAASADDGSLNTSGAGPK           | S66         | 0.63854862 | 1.11717909 | 0.83029336 |
| Q92934 | BAD      | RMSDEFVDSFK                       | S118        | 7.06E-05   | 1.75628554 | 0.0569389  |
| Q92934 | BAD      | MSDEFVDSFK                        | S118        | 0.07114732 | 1.46177138 | 0.46528233 |
| Q92934 | BAD      | HSSYPAGTEDDEGMGEEPSFR             | S75         | 0.49875082 | 0.93096447 | 0.75045249 |
| O95817 | BAG3     | SQSPAASDCSSSSASLPSGR              | S171        | 0.43928492 | 0.83146067 | 0.72004085 |
| O95817 | BAG3     | SQSPAASDCSSSSASLPSGR              | S173        | 0.5166853  | 0.78350384 | 0.75941066 |
| P46379 | BAG6     | ASPEPQRENAPAGTTAEAEAMSR           | S964,S973   | 0.17689328 | 1.33898716 | 0.55136011 |
| P46379 | BAG6     | VGDPPQPLPEEPMVQGAERASPEPQR        | S964        | 0.19770811 | 1.40228245 | 0.56896197 |
| P46379 | BAG6     | ENASPAGTTAEAEAMSR                 | S973        | 0.87212589 | 1.01286765 | 0.94378338 |
| Q9UQB8 | BAIAP2   | SSSTGNLLDK                        | S454        | 0.10915621 | 1.41634541 | 0.51002233 |
| Q9UQB8 | BAIAP2   | SLSPQSQSK                         | S325        | 0.85986717 | 1.04125157 | 0.93886034 |
| Q9UHR4 | BAIAP2L1 | TPASTPVSGTPQASPMIER               | T257,S261   | 0.3242141  | 0.83278945 | 0.64443296 |
| Q9UHR4 | BAIAP2L1 | TPASTPVSGTPQASPMIER               | S261        | 0.62473439 | 1.13394681 | 0.82174981 |
| Q16611 | BAK1     | MASGQGGPPR                        | S3          | 0.67252207 | 0.9336332  | 0.8481455  |
| Q92560 | BAP1     | APAASEGNHTDGAEAAAGSCAQAPSHSPNPKK  | S327        | 0.24624903 | 1.34167369 | 0.59107095 |
| P80723 | BASP1    | ETPAATEAPSPSTK                    | T196        | 0.7374437  | 1.06394225 | 0.87980525 |
| Q9NRL2 | BAZ1A    | RQSPSPVTLGR                       | S1413       | 0.33743427 | 1.08273749 | 0.65781985 |
| Q9NRL2 | BAZ1A    | ELDQDMVTEDEDDPGSHK                | T731        | 0.69085359 | 1.03801439 | 0.85751969 |
| Q9UIG0 | BAZ1B    | SLSGSPLK                          | S347        | 0.00525917 | 1.42420529 | 0.29251844 |
| Q9UIG0 | BAZ1B    | LAEDEGDSEPEAVGQSR                 | S1468       | 0.05983503 | 1.21539457 | 0.45298462 |
| Q9UIG0 | BAZ1B    | DHTVSGDEDYCPR                     | S947        | 0.96376606 | 1.00562701 | 0.98250904 |
| Q9UIF9 | BAZ2A    | AGDPGEMQSPPTGLGQPK                | S1397       | 0.33563046 | 1.12222222 | 0.65720257 |
| Q9UIF9 | BAZ2A    | ASPVTSPAFAFPTASPAK                | S509,T499   | 0.74338676 | 1.11600265 | 0.88297706 |
| Q8WY36 | BBX      | TADGRVSPAGGLDDKPK                 | S844        | 0.57655094 | 1.11155837 | 0.7967435  |
| O75815 | BCAR3    | QNSPVTQDGIQESPWQDR                | S83         | 0.14210746 | 0.77992958 | 0.52817885 |
| O75815 | BCAR3    | TGSEPALSPAVVR                     | S375        | 0.55205487 | 0.89085821 | 0.78076677 |
| P12694 | BCKDHA   | SVDEVNYWDK                        | S347        | 0.0325665  | 0.68361276 | 0.40879194 |
| P12694 | BCKDHA   | IGHHSTDDSSAYR                     | S339        | 0.24768735 | 2.91878264 | 0.5927592  |
| O14874 | BCKDK    | STSATDTHHVEMAR                    | S31         | 0.80047772 | 0.92513151 | 0.91398245 |
| O95999 | BCL10    | SNSDESINFSEK                      | S138        | 0.29015163 | 1.41200926 | 0.62187612 |
| O95999 | BCL10    | CSSCEFPDGTNNLSR                   | S134        | 0.33573151 | 1.19544641 | 0.65720257 |
| Q9BXX5 | BCL2L13  | EESLVEELPASEK                     | S426        | 0.00555973 | 1.36012756 | 0.29892804 |
| Q9BXX5 | BCL2L13  | EESLVEELPASEK                     | S420        | 0.26968621 | 0.76651192 | 0.60403212 |
| Q9BQE9 | BCL7B    | VDSSTNSSPSPQSELSPAHTSDFR          | S114,S118   | 0.2670369  | 1.0935167  | 0.60403212 |
| Q9BQE9 | BCL7B    | VDSSTNSSPSPQSELSPAHTSDFR          | S127        | 0.53689904 | 1.09134045 | 0.77155648 |
| Q8WU20 | BCL7C    | DPGGITAGSTDEPPMLTK                | T157        | 0.28527223 | 1.26612378 | 0.61903114 |
| Q8WU20 | BCL7C    | GTEPSPGGTPQPSRPVSPAGPEGVPEEAQPPR  | T111,S126   | 0.5861103  | 1.22926829 | 0.80118298 |
| Q8WU20 | BCL7C    | GTEPSPGGTPQPSRPVSPAGPEGVPEEAQPPR  | T118,S126   | 0.98264381 | 0.99226343 | 0.99124732 |
| O00512 | BCL9     | IPVEGLPSR                         | S687        | 0.27909696 | 1.1144528  | 0.61249442 |
| O00512 | BCL9     | AVTPVSGSNSSSADPK                  | T315        | 0.35172471 | 1.23505075 | 0.66702539 |
| O00512 | BCL9     | SISADSFDR                         | S104        | 0.54267113 | 1.05583566 | 0.77223514 |
| Q86UU0 | BCL9L    | EAPGSPPLSPR                       | S21         | 0.07239197 | 1.23408423 | 0.46528233 |
| Q86UU0 | BCL9L    | SPTLSQVHSPVLTSPSANLK              | S934,S949   | 0.29761699 | 0.89089418 | 0.62494294 |
| Q86UU0 | BCL9L    | GPGDLMGPGQLSPEEMAR                | S813        | 0.42776864 | 1.17145579 | 0.7137923  |
| Q86UU0 | BCL9L    | ANQISPSNSSLK                      | S88         | 0.55333683 | 0.92682927 | 0.7813313  |
| Q86UU0 | BCL9L    | SVSDSGEQR                         | S116        | 0.96402851 | 1.01640394 | 0.98250904 |

|         |          |                              |           |            |            |            |
|---------|----------|------------------------------|-----------|------------|------------|------------|
| Q9NYF8  | BCLAF1   | RIDISPSTLR                   | S658      | 0.12363184 | 1.47745879 | 0.5125107  |
| Q9NYF8  | BCLAF1   | NTPSQSHSIQHSPER              | S264,S268 | 0.16976236 | 2.30179649 | 0.54531589 |
| Q9NYF8  | BCLAF1   | KAEGEPQEESPLK                | S177      | 0.25883573 | 1.24597496 | 0.5989986  |
| Q9NYF8  | BCLAF1   | IDISPSTLR                    | S658      | 0.28321743 | 1.06863497 | 0.61775486 |
| Q9NYF8  | BCLAF1   | YSPSQNSPIHHIPSR              | Y284,S290 | 0.53818598 | 0.91833031 | 0.77155648 |
| Q9NYF8  | BCLAF1   | DTFEHDPSESIDFNK              | S198      | 0.57675108 | 1.07831984 | 0.7967435  |
| Q9NYF8  | BCLAF1   | DLFDYSPPLHK                  | S512      | 0.81770148 | 0.97601323 | 0.92137792 |
| Q9NYF8  | BCLAF1   | YSPSQNSPIHHIPSR              | S285,S290 | 0.87112963 | 0.97971136 | 0.94366974 |
| Q9NYF8  | BCLAF1   | DTFEHDPSESIDFNK              | S196      | 0.88618222 | 1.01950698 | 0.94851488 |
| Q9NYF8  | BCLAF1   | FNDSEGGDTEETEDYR             | S397      | 0.98172252 | 1.00358138 | 0.99062773 |
| Q6W2J9  | BCOR     | KVSGDSSHTEETAEEVPEDPLLK      | S1143     | 0.05195086 | 0.61007069 | 0.44612288 |
| P11274  | BCR      | HQDGLPYIDDSPPSSPHLSSK        | S459      | 0.31615462 | 0.65978129 | 0.63800725 |
| Q15155  | BET1     | SLSIEIGHEVK                  | S50       | 0.42476409 | 0.5192991  | 0.7137923  |
| Q9NYM9  | BET1L    | AQSPGAVEEILDR                | S9        | 0.00369287 | 0.70394333 | 0.29204389 |
| Q8TD16  | BICD2    | SPILLPK                      | S582      | 0.13668548 | 0.89136905 | 0.52306923 |
| O00499  | BIN1     | SPSPDPGSPAATPEIR             | S298      | 0.00739874 | 1.47946561 | 0.31708848 |
| O00499  | BIN1     | SPSPDPGSPAATPEIR             | S296,S303 | 0.05793949 | 1.23550092 | 0.45298462 |
| O00499  | BIN1     | SPSPDPGSPAATPEIR             | S296      | 0.48134443 | 0.92935416 | 0.74108884 |
| Q12982  | BNIP2    | KGSITEYTAEEK                 | S114      | 0.09518064 | 1.54499007 | 0.5018786  |
| Q12982  | BNIP2    | GSITEYTAEEK                  | S114      | 0.2706045  | 1.15083038 | 0.60915463 |
| O60238  | BNIP3L   | DHSSQSEEEVVEGEK              | S120      | 0.02132788 | 0.40154825 | 0.37949754 |
| O60238  | BNIP3L   | NGGLEHVSPSSSIHNGDMEK         | S64       | 0.04006376 | 0.44083943 | 0.43210738 |
| Q8NFC6  | BOD1L1   | DEYSSETTGKPEQNDDDTIK         | S2843     | 0.14548071 | 1.15396825 | 0.53170891 |
| Q8NFC6  | BOD1L1   | DVTLSPVK                     | S1531     | 0.22541885 | 0.89384289 | 0.58267075 |
| Q8NFC6  | BOD1L1   | AGSISSEEVDSQGNMMR            | S1701     | 0.25306275 | 1.39439664 | 0.59589813 |
| Q8NFC6  | BOD1L1   | TQLSPSIK                     | S3019     | 0.8075317  | 0.97428825 | 0.91602956 |
| Q14137  | BOP1     | TTEEQVQASTPCPR               | T106      | 0.1093043  | 0.76363016 | 0.51002233 |
| Q12830  | BPTF     | VLDDVSIKSPETK                | S1300     | 0.12519592 | 0.81866189 | 0.5125107  |
| Q12830  | BPTF     | QEQSPNANNDQPEDLIQGCSESDSSVLR | S1251     | 0.7380301  | 0.942532   | 0.88004305 |
| P15056  | BRAF     | RDSSDDWEIPDQITVQGR           | S447      | 0.28463025 | 0.36255279 | 0.61832807 |
| Q7Z569  | BRAP     | ECINAAPDPSPK                 | S119      | 0.85981628 | 1.0205636  | 0.93886034 |
| Q6PJG6  | BRAT1    | GSPNTASAEATLPR               | S742      | 0.80233656 | 1.0346369  | 0.91398245 |
| P38398  | BRCA1    | HQSESQGVGLSDK                | S1336     | 0.11956729 | 0.79442393 | 0.51002233 |
| P38398  | BRCA1    | SSEYIPISQNPGLSADK            | S1460     | 0.60330372 | 0.96705254 | 0.81195569 |
| Q15059  | BRD3     | SESPPLSDPK                   | S263      | 0.29555522 | 1.08345508 | 0.6248107  |
| Q92994  | BRF1     | GLSSAGGSPHREDAQPEHSASAR      | S553      | 0.35346193 | 1.14803922 | 0.66702539 |
| P55201  | BRPF1    | DGQTDASAAEISSSQETSK          | S860      | 0.12209719 | 1.15634878 | 0.5105605  |
| Q9NW68  | BSDC1    | KGSSTDISDWEK                 | S387      | 0.45624045 | 1.10099889 | 0.72561974 |
| P35613  | BSG      | RKPEDVLDDDDAGSAPLK           | S362      | 0.22490013 | 1.15785101 | 0.58267075 |
| P35613  | BSG      | KPEDVLDDDDAGSAPLK            | S362      | 0.92111906 | 0.99252616 | 0.96666561 |
| Q9BRD0  | BUD13    | YEYDPIDSPRR                  | S325      | 0.56271698 | 1.04573991 | 0.78599368 |
| Q9BRD0  | BUD13    | HDSPDLAPNVTYSLPR             | S271      | 0.58289185 | 0.89039039 | 0.80017409 |
| Q9BRD0  | BUD13    | HDTDPDPSLR                   | T159,S163 | 0.7699305  | 1.02663834 | 0.89575562 |
| Q13895  | BYSL     | MPQDGSDDDEEWPTLEK            | S98       | 0.49128744 | 0.85857299 | 0.74653475 |
| Q7L1Q6  | BZW1     | NAEESESEAEEGD                | S411      | 0.01527538 | 3.68945125 | 0.36631449 |
| Q8N655  | C10orf12 | EITSHHEGGGVDSPR              | S273      | 0.23549141 | 0.7557624  | 0.58536202 |
| Q8N655  | C10orf12 | ESSTFTDENPSETEESEAAAGGIGK    | S449      | 0.36077671 | 0.77004343 | 0.6705258  |
| Q8N655  | C10orf12 | EITSHHEGGGVDSPR              | T263      | 0.51021378 | 1.08057832 | 0.75641069 |
| O00193  | C11orf58 | SASPDDDLGSNNWEAADLGNEER      | S15       | 0.34840313 | 0.8526393  | 0.6638961  |
| O00193  | C11orf58 | SASPDDDLGSNNWEAADLGNEER      | S17       | 0.47227597 | 0.81237234 | 0.73460091 |
| O00193  | C11orf58 | EESAELQAAEHPDEVEDPK          | S147      | 0.52133118 | 0.81081081 | 0.76237684 |
| O00193  | C11orf58 | RSASPDDDLGSNNWEAADLGNEER     | S17       | 0.91264082 | 1.0199005  | 0.96372481 |
| Q9BUA3  | C11orf84 | AESPAPPPGLR                  | S308      | 0.92632791 | 0.98987185 | 0.96756561 |
| Q8N5I9  | C12orf45 | IEVLDSKASK                   | S178      | 0.08465901 | 0.80272519 | 0.49347121 |
| Q6ZUT6  | C15orf52 | LGSAPAAASPALASPEGPK          | S392      | 0.15535179 | 1.40968593 | 0.53741649 |
| Q6ZUT6  | C15orf52 | SPPTQVAISSDSAR               | S201      | 0.87663751 | 0.99009901 | 0.94565946 |
| Q8IXM2  | C17orf49 | VYEDSGIPLPAESPK              | S96       | 0.40523424 | 0.87581601 | 0.6993632  |
| Q8IXM2  | C17orf49 | VYEDSGIPLPAESPK              | S96       | 0.65556128 | 1.05778547 | 0.8394813  |
| Q9HASO  | C17orf75 | ELESSEEGGSAEER               | S18       | 0.44408757 | 1.16046621 | 0.72245411 |
| Q53F19  | C17orf85 | AEAPAGPALGLPSPEAESGVDR       | S25       | 0.76626046 | 0.95530146 | 0.89401672 |
| Q96B23  | C18orf25 | RDSSSEQLASTESDKPTTGR         | S66       | 0.60455692 | 1.03628231 | 0.81202192 |
| Q9BQ61  | C19orf43 | GGPGSTLSFVGK                 | S114      | 0.72629373 | 0.93033705 | 0.87523758 |
| Q9BW04  | C1orf116 | AEDAPLSSGEDPNSR              | S281      | 0.80339639 | 1.08130452 | 0.91419991 |
| Q8NAX2  | C1orf172 | STMGSSFSYDPVK                | S158      | 0.67801394 | 0.95518222 | 0.85041717 |
| Q9H425  | C1orf198 | SSLDALGPTR                   | S175      | 0.37824631 | 0.80395804 | 0.67666227 |
| A11L170 | C1orf226 | TSSLDNEGPHPDLLSFE            | T256      | 0.19700699 | 0.9341235  | 0.56846559 |
| Q9BU76  | C1orf35  | RPAEATSSPTSPERPR             | S220      | 0.32050648 | 1.13380282 | 0.64118612 |
| Q9BU76  | C1orf35  | RPAEATSSPTSPERPR             | T219,S217 | 0.53266726 | 1.10674157 | 0.76840363 |
| Q8N6N3  | C1orf52  | LLPEGEETLESDEK               | S158      | 0.25659812 | 1.11864407 | 0.59892773 |
| O14523  | C2CD2L   | EAGLSQSHDDLSTATATPSVR        | S662      | 0.38182188 | 1.13538145 | 0.67941113 |
| Q9BVC5  | C2orf49  | SPPLSPVGTTPVK                | S189      | 0.09635576 | 1.37686632 | 0.5018786  |
| Q9BVC5  | C2orf49  | SPPLSPVGTTPVK                | S189,S193 | 0.93121455 | 0.99203919 | 0.96968952 |
| Q96GV9  | C5orf30  | SLDVLNLDK                    | S167      | 0.5779168  | 0.89045749 | 0.7967435  |
| Q9HGK1  | C6orf106 | VEGNFNPFASPK                 | S215      | 0.13419754 | 0.77473558 | 0.52045275 |
| Q9BRJ6  | C7orf50  | ELDEEGSDPPLGR                | S175      | 0.06009839 | 1.20396885 | 0.45298462 |
| Q9BRJ6  | C7orf50  | GEAVLRPGLDAEPELSPPEEQR       | S59       | 0.7017304  | 0.96345257 | 0.86274503 |
| Q8N0T1  | C8orf59  | NVFIASQK                     | S19       | 0.09879358 | 0.57427812 | 0.5018786  |
| Q9BUH6  | C9orf142 | LAAAEETAIVSPR                | S148      | 0.20080672 | 0.91376912 | 0.56975265 |
| Q9BUW7  | C9orf16  | LEFQQQLGEAPSDASP             | S82       | 0.64303879 | 1.10016526 | 0.83055345 |
| Q8IXQ3  | C9orf40  | IDAGTMAEPSASPSK              | S69       | 0.08088282 | 0.69950739 | 0.48773691 |
| Q9NZ63  | C9orf78  | RGDSESEDEEQDSEEVV            | S17       | 0.00509995 | 6.03672762 | 0.29204389 |

|         |          |                                |             |            |            |            |
|---------|----------|--------------------------------|-------------|------------|------------|------------|
| Q9H8G2  | CAAP1    | ILEGDNMGMSDMEEEADGSK           | S203        | 0.38332919 | 1.16878981 | 0.67941113 |
| Q9H8G2  | CAAP1    | STDSSVSGSLQQETK                | S89         | 0.43962047 | 1.0921659  | 0.72004085 |
| Q9H8G2  | CAAP1    | SVNEILGLAESPNPEK               | S312        | 0.80311574 | 1.06490148 | 0.91419991 |
| P27708  | CAD      | ASDPGLPAEPEK                   | S1859       | 0.09911737 | 0.71056824 | 0.5018786  |
| P27708  | CAD      | VLGTSPEAIDSAENR                | S1038       | 0.4803012  | 1.16240074 | 0.74052465 |
| P27708  | CAD      | IHRASDPGLPAEPEK                | S1859       | 0.72125351 | 1.08247012 | 0.87405855 |
| Q13557  | CAMK2D   | ESTESSNTTIEDEDVK               | T337        | 0.05185645 | 1.44191477 | 0.44612288 |
| Q13557  | CAMK2D   | ESTESSNTTIEDEDVK               | T331        | 0.40690845 | 0.71280804 | 0.69976652 |
| Q13555  | CAMK2G   | GSTESCNTTIEDEDLK               | T382        | 0.38391179 | 1.30104541 | 0.67941113 |
| Q5T5Y3  | CAMSAP1  | SPNSHSDSEPWTLR                 | S722        | 0.4270748  | 1.08353306 | 0.7137923  |
| Q5T5Y3  | CAMSAP1  | RPSEGPQLVR                     | S629        | 0.63448949 | 1.06847936 | 0.82701539 |
| Q5T5Y3  | CAMSAP1  | SIQGEDIPDQR                    | S431        | 0.6605184  | 0.90635785 | 0.84222623 |
| Q08AD1  | CAMSAP2  | YDGESDKEQFDDDDQK               | S1148       | 0.08764637 | 1.19247295 | 0.4960359  |
| Q08AD1  | CAMSAP2  | SISNEGLTLNNSHVSK               | S464        | 0.35955414 | 0.89571263 | 0.67026935 |
| Q08AD1  | CAMSAP2  | SPTTPIDPEK                     | S862        | 0.61181464 | 0.94470774 | 0.81558431 |
| P27824  | CANX     | SDAEEDGGTVSQEEEDRKP            | S564        | 0.01977017 | 1.4545676  | 0.37738796 |
| P27824  | CANX     | SDAEEDGGTVSQEEEDRKP            | S554        | 0.02612848 | 1.28735632 | 0.40703825 |
| P27824  | CANX     | QKSDAEEDGGTVSQEEEDR            | S554        | 0.13454978 | 1.22989234 | 0.52045275 |
| P27824  | CANX     | AEDEILNRSR                     | S583        | 0.17123528 | 1.27874763 | 0.54531589 |
| P27824  | CANX     | SDAEEDGGTVSQEEEDR              | S554,S564   | 0.42057051 | 0.53457923 | 0.70988583 |
| P27824  | CANX     | QKSDAEEDGGTVSQEEEDR            | S554,S564   | 0.6171747  | 0.9227728  | 0.81837121 |
| P27824  | CANX     | SDAEEDGGTVSQEEEDR              | S554        | 0.62420139 | 0.85704798 | 0.82174981 |
| P27824  | CANX     | SDAEEDGGTVSQEEEDR              | S564        | 0.78918352 | 1.05528596 | 0.90808284 |
| Q9Y2V2  | CARHSP1  | TFSATVR                        | S52         | 0.62853092 | 0.95438175 | 0.82322298 |
| Q9Y2V2  | CARHSP1  | GNVVPSPPLTR                    | S41         | 0.93445936 | 1.01079306 | 0.97181363 |
| O15234  | CASC3    | YGSPPQRDPNWNNGER               | S265        | 0.07823039 | 1.83603845 | 0.48346982 |
| O15234  | CASC3    | STVTGERQSGDQESTEPVENK          | S148        | 0.1134061  | 1.30919765 | 0.51002233 |
| O15234  | CASC3    | GGGSCSGSAGGGSGSLPQR            | S45         | 0.64934921 | 1.06005097 | 0.83491453 |
| O15234  | CASC3    | LEQTSVRDPSPEADAPVLGSPK         | S363        | 0.8820959  | 0.98842258 | 0.94728407 |
| Q8WXE0  | CASKIN2  | SQSFALR                        | S858        | 0.08414024 | 0.5963     | 0.49347121 |
| Q8WXE0  | CASKIN2  | SPSQESIGAR                     | S695        | 0.09137761 | 0.70966342 | 0.49878876 |
| Q8WXE0  | CASKIN2  | VGLSPDSPAGDRNSVSGSEGSVGSIR     | S396        | 0.68652494 | 1.12150417 | 0.85418907 |
| P20810  | CAST     | KPADDQDPIDALSGDLDCPSTTETSQNTAK | S655        | 0.92524762 | 0.97868387 | 0.96756561 |
| P51636  | CAV2     | FADSDQDRDPHR                   | S36         | 0.02774178 | 1.28779599 | 0.40710444 |
| Q13185  | CBX3     | LTHWSCPDEEAQ                   | S176        | 0.12995048 | 1.34312697 | 0.5125107  |
| Q9HC52  | CBX8     | HGSGPPSSGGGLYR                 | S311        | 0.23034454 | 1.16256997 | 0.58327432 |
| Q9HC52  | CBX8     | RQSDLVQCQGVTSPPSSAEATGK        | S256        | 0.66483699 | 0.9321267  | 0.84417266 |
| Q9HC52  | CBX8     | RQSDLVQCQGVTSPPSSAEATGK        | S268        | 0.88120352 | 0.98771816 | 0.94687741 |
| Q8N163  | CCAR2    | VVSPPEPEK                      | S569        | 0.51881968 | 1.30733924 | 0.76077832 |
| Q8N163  | CCAR2    | SVANSQSEMFESSLQDMPK            | S678        | 0.80067202 | 0.93193867 | 0.91398245 |
| Q96HB5  | CCDC120  | SNSSEALLVDR                    | S358        | 0.05353339 | 0.78692786 | 0.44612288 |
| P13994  | CCDC130  | VPEEAAQDRPMSPGDCPPETTETPK      | S332        | 0.06231592 | 1.34405898 | 0.45817252 |
| Q96JG6  | CCDC132  | DEETEDVLASNGYESDEQEK           | S546        | 0.68185751 | 1.08340908 | 0.85159594 |
| Q86WR0  | CCDC25   | VENMSSNQDGNDSDEFM              | S204        | 0.83556813 | 0.95492105 | 0.92778088 |
| Q96MMW1 | CCDC43   | AALLAQYADVTDEEAEDEK            | T139        | 0.28729293 | 0.37947347 | 0.62064599 |
| Q16204  | CCDC6    | LDQPVSAPPSPR                   | S244        | 0.06991699 | 1.55584119 | 0.4637455  |
| Q16204  | CCDC6    | LDQPVSAPPSPR                   | S240,S244   | 0.36165992 | 1.4611793  | 0.6705258  |
| Q16204  | CCDC6    | QLSESESSLEMDDER                | S323        | 0.59417012 | 0.91855011 | 0.80647767 |
| Q16204  | CCDC6    | SGGIVISPFRR                    | S52         | 0.71692606 | 1.17833132 | 0.87242681 |
| Q6ZRK6  | CCDC73   | LLLNKSDK                       | S726        | 0.45045005 | 0.83090077 | 0.72422173 |
| Q9H6F5  | CCDC86   | EPGSPPSVQR                     | S47         | 0.01045948 | 0.70904836 | 0.35060945 |
| Q9H6F5  | CCDC86   | QQDLHLESPQR                    | S102        | 0.03982158 | 0.65742574 | 0.43210738 |
| Q9H6F5  | CCDC86   | AGLGSPPERPPK                   | S58         | 0.05086839 | 0.80696662 | 0.44612288 |
| Q9H6F5  | CCDC86   | LQQGAGLESPQGPPEGAASQPR         | S91         | 0.08249927 | 1.17308483 | 0.49194574 |
| Q9H6F5  | CCDC86   | ALVEFESNPEETREPGSPPSVQR        | S47         | 0.6539053  | 0.9312723  | 0.8383178  |
| Q9H6F5  | CCDC86   | LQQGAGLESPQGPPEGAASQPR         | S80,S91     | 0.65851761 | 0.96628788 | 0.84100467 |
| Q9H6F5  | CCDC86   | LGGLRPESPESLTVSR               | S18         | 0.68291488 | 0.8375521  | 0.85225664 |
| Q9Y3X0  | CCDC9    | EGAASPAPETPQPTSPETSPK          | S386        | 0.07180666 | 1.16891412 | 0.46528233 |
| Q9BSQ5  | CCM2     | GIITDSFGR                      | S384        | 0.10516486 | 0.84428941 | 0.50572948 |
| Q95067  | CCNB2    | GPSPTPEDVSMK                   | S92         | 0.40884788 | 0.86052202 | 0.70127181 |
| Q9UK58  | CCNL1    | SPISINVK                       | S352        | 0.05062993 | 1.27843137 | 0.44612288 |
| Q8ND76  | CCNY     | SASADNLTLP                     | S326        | 0.28218946 | 1.12508544 | 0.61676369 |
| Q8N7R7  | CCNY1    | SFSADNFIGIQR                   | S344        | 0.36977853 | 0.57919285 | 0.67368198 |
| P49368  | CCT3     | KGESQTDIEITR                   | S252        | 0.33287355 | 0.93146632 | 0.65478662 |
| Q9Y5K6  | CD2AP    | SVDFDSLTVR                     | S458        | 0.8483563  | 0.96933419 | 0.93278712 |
| Q95400  | CD2BP2   | HSLDSDEEEDDDGGGSK              | S49         | 0.70419796 | 1.01966568 | 0.86476689 |
| O15446  | CD3EAP   | QEQUINTEPLEDTVLSPTK            | S285        | 0.06493409 | 0.77382319 | 0.46140392 |
| P16070  | CD44     | SQEMVHLVNK                     | S706        | 0.23605565 | 1.17966102 | 0.58536202 |
| P16070  | CD44     | LVINSGNGAVEDR                  | S686        | 0.39631031 | 1.40715313 | 0.69247075 |
| P48960  | CD97     | YSEFTTSTSGTGHNQTR              | S818        | 0.45743527 | 0.7797259  | 0.726939   |
| P48960  | CD97     | ALRASSEGI                      | S831        | 0.76067463 | 0.88562285 | 0.88975212 |
| P30305  | CDC25B   | SVTPPEEQQAEEPK                 | S353        | 0.1934029  | 0.84584527 | 0.5651429  |
| Q8NHZ8  | CDC26    | EDVEVVGSDGEGAIGLSSDPK          | S42         | 0.41558389 | 0.68083831 | 0.70812712 |
| Q9Y5S2  | CDC42BPB | HSTPNSNSNPSGPPSPNSPHR          | S1690       | 0.40135101 | 1.20066397 | 0.69687959 |
| Q9Y5S2  | CDC42BPB | HSTPNSNSNPSGPPSPNSPHR          | S1690,S1693 | 0.70549358 | 1.04207682 | 0.86536969 |
| Q6DT37  | CDC42BPG | SLPLSPELESSP                   | S1550       | 0.1542743  | 0.84884892 | 0.53741649 |
| Q6DT37  | CDC42BPG | RPASMGSEGLGGDADPMK             | S1492       | 0.52924793 | 1.1392616  | 0.7665292  |
| Q00587  | CDC42EP1 | RSDSLLSFR                      | S192        | 0.09337689 | 1.36248785 | 0.5018786  |
| Q00587  | CDC42EP1 | SDSLLSFR                       | S192        | 0.16533595 | 1.16930304 | 0.54308896 |
| Q9UKI2  | CDC42EP3 | LSCEPVMEEK                     | S144        | 0.01131427 | 0.61186991 | 0.36250201 |
| Q9UKI2  | CDC42EP3 | LPRLSCEPVMEEK                  | S144        | 0.16038541 | 0.59201516 | 0.54196083 |

|        |          |                              |             |            |            |            |
|--------|----------|------------------------------|-------------|------------|------------|------------|
| Q9UKI2 | CDC42EP3 | ANSTSDSVFTETPSPVLK           | S89,S100    | 0.20497034 | 0.68365097 | 0.57194083 |
| Q9UKI2 | CDC42EP3 | ANSTSDSVFTETPSPVLK           | S89         | 0.23369141 | 0.82420449 | 0.58486307 |
| Q9UKI2 | CDC42EP3 | ANSTSDSVFTETPSPVLK           | S100        | 0.82860802 | 1.06722992 | 0.92537257 |
| Q9H3Q1 | CDC42EP4 | AGEPDGSELDEQSPSSSSK          | S64         | 0.29113468 | 0.68034017 | 0.62198706 |
| Q99459 | CDC5L    | GGLNTPLHESDFSGVTPQR          | T396,S390   | 0.16404931 | 0.77730182 | 0.54196083 |
| Q99741 | CDC6     | LEPTNVQTVTCSPR               | S45         | 0.872985   | 1.02348307 | 0.94378338 |
| Q69YH5 | CDCA2    | AGTDSPPVSCASVTEER            | S710        | 0.92973981 | 0.97969922 | 0.96909229 |
| Q99618 | CDCA3    | QLSEVFETEDSK                 | S94         | 0.20903753 | 0.64489373 | 0.57425546 |
| Q53HL2 | CDCA8    | IYNISNGSPLADSK               | S219        | 0.67149514 | 0.90084908 | 0.84718158 |
| P06493 | CDK1     | IGEGTYGVVYK                  | T14         | 0.00506417 | 0.53229096 | 0.29204389 |
| P06493 | CDK1     | IGEGTYGVVYK                  | Y15,T14     | 0.04432389 | 0.42761104 | 0.44293212 |
| Q9UQ88 | CDK11A   | RDSLEEGELR                   | Y15         | 0.28031256 | 0.82521848 | 0.61432631 |
| Q9UQ88 | CDK11A   | RGTSRPPPEGGLGYSQLGDDDLK      | S47         | 0.24254247 | 1.13106961 | 0.58886046 |
| Q9UQ88 | CDK11A   | GTSRPPPEGGLGYSQLGDDDLK       | S740        | 0.35397904 | 1.24037466 | 0.66702539 |
| Q9NVV4 | CDK12    | GSPVFLPR                     | S740        | 0.60494523 | 0.87917676 | 0.81202192 |
| Q14004 | CDK13    | GGDVSPSPYSSSSWR              | S423        | 0.40066504 | 1.10240427 | 0.69644028 |
| Q00536 | CDK16    | QLSMTLR                      | S383        | 0.18437714 | 1.08090615 | 0.55849825 |
| Q00537 | CDK17    | MGSDDGESDQASGTSSDEVQSPTVGLR  | S12         | 0.11258803 | 1.19921425 | 0.51002233 |
| Q00537 | CDK17    | RISMEDLNK                    | S122        | 0.31623484 | 1.15235485 | 0.63800725 |
| Q00537 | CDK17    | RASLSEIGFGK                  | S137        | 0.56669456 | 1.08214286 | 0.7897005  |
| Q92903 | CDS1     | EGEAAGGDHETESTSDKETDIDDR     | S180        | 0.76751346 | 1.05878192 | 0.8945081  |
| Q95674 | CDS2     | VAHEPVAPPEDKESESEAK          | S37         | 0.00267841 | 2.2218135  | 0.29204389 |
| Q9UKY7 | CDV3     | VQAMQISSEK                   | S21         | 0.01480827 | 1.36495389 | 0.36631449 |
| Q9UKY7 | CDV3     | VQAMQISSEKEDDNEK             | S107        | 0.18951567 | 0.84091161 | 0.56400142 |
| Q9Y232 | CDYL     | TAVDGFQSESPEK                | S107        | 0.35394042 | 1.6485352  | 0.66702539 |
| Q03701 | CEBPZ    | SQLDDHPESDDEENFIDANDEDMEK    | S216        | 0.3674349  | 0.89405723 | 0.67368198 |
| Q03188 | CENPC    | CSLSEPLESDEADLAK             | S629        | 0.36544325 | 0.57946162 | 0.67336704 |
| P49454 | CENPF    | ITETGAVKPTGECSEQSPDNTYEPGGDK | S613        | 0.68121928 | 0.91147649 | 0.85159594 |
| O94986 | CEP152   | NVSPFVFCGEGGGFLHK            | S1822       | 0.45622129 | 0.84015748 | 0.72561974 |
| Q55W79 | CEP170   | LGESADSELADADK               | S1461       | 0.13043069 | 0.74504859 | 0.5125107  |
| Q55W79 | CEP170   | SESLDPDSSMDTTLIK             | S1112       | 0.01376529 | 0.78673177 | 0.36591793 |
| Q9Y4F5 | CEP170B  | AGSFTGTSDEPAAPAR             | S881        | 0.24357191 | 0.19720384 | 0.58932994 |
| Q9Y4F5 | CEP170B  | SPEPDGPAPAFRLR               | S1179       | 0.05803811 | 0.71441814 | 0.45298462 |
| Q9Y4F5 | CEP170B  | HEDGTQSDSEDPLAK              | S853        | 0.37268973 | 0.85069817 | 0.67495398 |
| Q9Y4F5 | CEP170B  | SQSFTHSPSGDPK                | S360        | 0.69197358 | 1.08121827 | 0.85857953 |
| Q9BV73 | CEP250   | LHSPGATSTAEIGSR              | S421        | 0.80263865 | 0.93688012 | 0.91398245 |
| Q53EZ4 | CEP55    | SPTAALNESLVECPK              | S2229       | 0.52603176 | 0.90605801 | 0.76509399 |
| P41208 | CETN2    | RMSPKPELTEEQK                | T430        | 0.25297641 | 1.10126582 | 0.59589813 |
| P23528 | CF1L     | ASGVAVSDGVIK                 | S20         | 0.41938912 | 1.09713024 | 0.70902218 |
| Q9P2M7 | CGN      | KVSLVLEK                     | S3          | 0.07756285 | 0.68379247 | 0.48183834 |
| Q9P2M7 | CGN      | SHSQASLAGPGVPDPSNR           | S332        | 0.00435405 | 1.513918   | 0.29204389 |
| Q9P2M7 | CGN      | SHSQASLAGPGVPDPSNR           | S131        | 0.64290312 | 1.05437941 | 0.83055345 |
| Q9P2M7 | CGN      | SNSMLELAPK                   | S134        | 0.66518503 | 1.04334964 | 0.84417266 |
| Q0VF96 | CGNL1    | RQDSAGPVLDGAR                | S149        | 0.80077759 | 1.02786378 | 0.91398245 |
| Q13111 | CHAF1A   | GLLSNHTGSPR                  | S283        | 0.18268858 | 0.87695749 | 0.55757178 |
| Q13111 | CHAF1A   | SPSTTYLHTPTPSEDAAIPSK        | S772        | 0.00669799 | 0.85142352 | 0.31708848 |
| Q13112 | CHAF1B   | TQDPSPGTTPPQAR               | S775        | 0.74813084 | 0.93629893 | 0.88634115 |
| Q13112 | CHAF1B   | GSSPGPRPVEGTPASR             | S429        | 0.45335438 | 0.91336406 | 0.72537341 |
| Q96JM3 | CHAMP1   | TSPASLDFPESQK                | S410        | 0.95941258 | 1.00635786 | 0.98250904 |
| Q96JM3 | CHAMP1   | LAPVPSPEPQKPAVPSPEVK         | T458        | 0.0664107  | 0.83829475 | 0.46295119 |
| Q96JM3 | CHAMP1   | GGSPDLWK                     | S204,S214   | 0.1282596  | 1.54736671 | 0.5125107  |
| Q96JM3 | CHAMP1   | KPGPPLSPEIR                  | S476        | 0.30842654 | 1.11015886 | 0.63577254 |
| Q96JM3 | CHAMP1   | KTSPASLDFPESQK               | S427        | 0.4517703  | 1.11832012 | 0.72471954 |
| Q96JM3 | CHAMP1   | KTSPASLDFPESQK               | T458        | 0.47114018 | 1.24165942 | 0.73369435 |
| Q9NX63 | CHCHD3   | YSGAYGASVDEELK               | S459        | 0.50515454 | 1.19546028 | 0.75314323 |
| O14646 | CHD1     | ASSSGPRSPLDQR                | S50         | 0.02972926 | 0.67884218 | 0.40811311 |
| Q12873 | CHD3     | ELQDGDPPSSPTNDPTVK           | S1677       | 0.47071625 | 1.19609477 | 0.73358967 |
| Q12873 | CHD3     | METEADAPSPAPSLGER            | S713        | 0.40975792 | 1.13883357 | 0.70237994 |
| Q14839 | CHD4     | TPTPSTPGDTPNTAPVPPAEDGIK     | S1601,S1605 | 0.76112087 | 1.08978413 | 0.88979561 |
| Q14839 | CHD4     | SAIDLTPIVVEDK                | S1544       | 0.29709611 | 1.20899027 | 0.62494294 |
| Q14839 | CHD4     | STAPETAIECTQAPAPASEDEK       | S1648       | 0.36278699 | 0.69156482 | 0.67145774 |
| Q14839 | CHD4     | IEENSLKEEESIEGK              | S1602       | 0.48044578 | 1.04901337 | 0.74052465 |
| Q14839 | CHD4     | TPTPSTPGDTPNTAPVPPAEDGIK     | S1570       | 0.5229036  | 1.16398537 | 0.76304189 |
| Q14839 | CHD4     | TPTPSTPGDTPNTAPVPPAEDGIK     | T1540       | 0.62587814 | 1.15473041 | 0.82174981 |
| Q14839 | CHD4     | QVNYNDGQSQEDR                | T1553       | 0.64534812 | 1.16271291 | 0.83175911 |
| Q9P2D1 | CHD7     | NIPSPGQLDPDTR                | S1349       | 0.97458259 | 1.00512774 | 0.98795929 |
| Q9P2D1 | CHD7     | RTLSAEDAIVTK                 | S2559       | 0.65954514 | 1.04319249 | 0.84198362 |
| Q9HCK8 | CHD8     | TASPLLRPDAPVEK               | S2533       | 0.83219077 | 0.93960542 | 0.92605982 |
| Q9HCK8 | CHD8     | SPEETATQVPSLESLLTK           | T1993       | 0.63187746 | 1.10799371 | 0.82494403 |
| Q3L8U1 | CHD9     | VMSPENFPTASVEGK              | S2008       | 0.96297396 | 0.98822043 | 0.98250904 |
| Q3L8U1 | CHD9     | YAEDIEGKQSEEEVK              | S550        | 0.32992662 | 1.18724533 | 0.65025856 |
| Q9UQN3 | CHMP2B   | ATISDEEIER                   | S654        | 0.81098749 | 1.02473419 | 0.91877983 |
| Q8WUX9 | CHMP7    | ISDAEAEAELEK                 | S199        | 0.269811   | 1.1602537  | 0.60403212 |
| Q9NRG0 | CHRA1    | REEDEENDNDSHDHDEADS          | S417        | 0.08088631 | 0.6086256  | 0.48773691 |
| Q8WVB6 | CHTF18   | GDAASSPAPAASVGSQGGGAR        | S124        | 0.74001932 | 1.0265718  | 0.88092337 |
| Q96RKO | CIC      | TQSLSALPK                    | S64         | 0.79697395 | 1.05180142 | 0.91333498 |
| Q86X95 | CIR1     | NLTANDPSQEVYVASEGEEDEPEVFLK  | S173        | 0.05973634 | 0.60655335 | 0.45298462 |
| Q7Z460 | CLASP1   | QSSGSATNVASTPDNR             | S202        | 0.27413635 | 0.4011659  | 0.60717337 |
| Q7Z460 | CLASP1   | RQSSGSATNVASTPDNR            | S649        | 0.03853228 | 0.75901393 | 0.43108921 |
| Q7Z460 | CLASP1   | SRSDDIVNAAASAK               | S646,S649   | 0.25457828 | 0.95767694 | 0.59692907 |
|        |          |                              | S600        | 0.45532705 | 0.87992911 | 0.72561974 |

|        |           |                            |           |            |            |            |
|--------|-----------|----------------------------|-----------|------------|------------|------------|
| Q7Z460 | CLASP1    | SQEDLNEPIK                 | S1196     | 0.55048512 | 1.06742397 | 0.77957199 |
| Q7Z460 | CLASP1    | RQSSGSATNVASTPDNR          | T651      | 0.62423497 | 1.11520984 | 0.82174981 |
| Q7Z460 | CLASP1    | NSSNTSVGSPSNTIGR           | S1091     | 0.87848565 | 0.9675     | 0.94568481 |
| Q7Z460 | CLASP1    | RQSSGSATNVASTPDNR          | S646      | 0.96097029 | 0.99421965 | 0.98250904 |
| O75122 | CLASP2    | SRSDIDVNAAGAK              | S370      | 0.17628891 | 0.9088153  | 0.5505402  |
| O75122 | CLASP2    | SFDDEESVDGPNRPSAASAFK      | S8        | 0.4281228  | 0.91402052 | 0.7137923  |
| Q8N2M8 | CLASRP    | RDSPTYDPYK                 | S294      | 0.29724433 | 0.75986794 | 0.62494294 |
| O15551 | CLDN3     | STGPGASLGTGYDR             | S203      | 0.42560675 | 0.90250651 | 0.7137923  |
| Q14677 | CLINT1    | ASPDQNASTHTPQSSVK          | S299      | 0.59167444 | 0.885694   | 0.80543398 |
| P30622 | CLIP1     | TASESINLSEAGSIK            | S195      | 0.03392021 | 0.47007493 | 0.41682455 |
| P49761 | CLK3      | YRSPDPYLSYR                | Y155      | 0.05533928 | 0.71218316 | 0.45081948 |
| P49761 | CLK3      | SPEPDPYLSYR                | S157      | 0.60470197 | 1.05761651 | 0.81202192 |
| Q961Q2 | CLMN      | HEPHQDSGEEAEGCPSAPEETPVDK  | S635      | 0.07882136 | 1.15532734 | 0.48479487 |
| P54105 | CLNS1A    | EPVADEEEEDSDDVEPITEFR      | S102      | 0.19205903 | 0.57629339 | 0.5651429  |
| Q9HAW4 | CLSPN     | SPSPGLFR                   | S810      | 0.00121207 | 0.64039848 | 0.22363976 |
| Q9HAW4 | CLSPN     | TTYDSAEENK                 | S83       | 0.00479236 | 0.60203659 | 0.29204389 |
| Q9HAW4 | CLSPN     | FTSQDASTPASSELNK           | S950      | 0.14419615 | 0.74954119 | 0.52860997 |
| Q9HAW4 | CLSPN     | LDEDDSCSLTK                | S762      | 0.16360828 | 0.6700173  | 0.54196083 |
| O75153 | CLUH      | SEDPGQAEAGSEEGSSASGLAK     | S664      | 0.44225403 | 1.1398215  | 0.72140914 |
| Q969H4 | CNKSRI    | SPSLAPLSR                  | S305,S314 | 0.08392485 | 1.29623534 | 0.49347121 |
| Q6P4Q7 | CNNM4     | SASLSYPR                   | S664      | 0.37089877 | 0.75065173 | 0.67442469 |
| Q9NZN8 | CNOT2     | TNSMSSSGLGSPNR             | S165      | 0.05616482 | 0.74318329 | 0.45298462 |
| Q9C0A0 | CNTNAP4   | LISISGK                    | S520      | 0.68037095 | 0.94294074 | 0.85138739 |
| Q535F7 | COBL1     | VEAENISPK                  | S515      | 0.10612281 | 1.17221159 | 0.50572948 |
| Q535F7 | COBL1     | DQTASAPATPLVNK             | S294      | 0.37871043 | 0.82150869 | 0.67666227 |
| Q535F7 | COBL1     | QSSLTFOSSDPEQMR            | S1146     | 0.37872009 | 1.09878049 | 0.67666227 |
| P38432 | COIL      | AFQLEEGEETEPDCK            | T122      | 0.0231881  | 0.44442065 | 0.39017457 |
| P38432 | COIL      | LIIESPNTSSTEPA             | T570      | 0.22986887 | 1.14298808 | 0.58267075 |
| P53621 | COPA      | NLSPGAVESDVR               | S173      | 0.49620015 | 1.07112971 | 0.74981346 |
| P35606 | COBP2     | STAQQLDGGKASPTPVIVASHTANK  | S859      | 0.34985152 | 0.79555939 | 0.6654605  |
| O75131 | CPNE3     | EASRSSPVFEFCINEK           | S242      | 0.20098528 | 1.37812589 | 0.56975265 |
| P16220 | CREB1     | ILNDLSSDAPGVPR             | S143      | 0.873563   | 1.0692771  | 0.94409187 |
| Q92793 | CREBBP    | EEEESSNGTASQSTSPSQPR       | S1076     | 0.73019637 | 1.1701496  | 0.87667044 |
| P52943 | CRIP2     | ASSVTTFTGEPNTPCR           | S115      | 0.07311083 | 0.24831012 | 0.46713103 |
| Q6UUV9 | CRTC1     | TNSDSALHQSTMTPQPESSGSDVHQK | S151      | 0.55342282 | 0.81900213 | 0.7813313  |
| P21291 | CSR1P     | GFGFGQAGALVHSE             | S192      | 0.56028201 | 1.11343788 | 0.78468723 |
| Q05D32 | CTDSPL2   | NGTSGSDSPGQAVEAEIIVK       | S165      | 0.82904154 | 0.95050175 | 0.92538008 |
| Q05D32 | CTDSPL2   | SQVNGEAGSYEMTNQHVK         | S104      | 0.9473583  | 1.01236188 | 0.9788835  |
| Q05D32 | CTDSPL2   | LEDNPSSGSPPR               | S134      | 0.94825531 | 1.01930806 | 0.9788835  |
| P35221 | CTNNA1    | TSVQTEDDQLIAGQ SAR         | T654      | 0.03428727 | 0.76908752 | 0.41898    |
| P35221 | CTNNA1    | SRTSVQTEDDQLIAGQ SAR       | S652,S655 | 0.0599584  | 0.47789251 | 0.45298462 |
| P35221 | CTNNA1    | SRTSVQTEDDQLIAGQ SAR       | S655      | 0.09482668 | 0.72845629 | 0.5018786  |
| P35221 | CTNNA1    | SRTSVQTEDDQLIAGQ SAR       | T654      | 0.09636053 | 0.74036939 | 0.5018786  |
| P35221 | CTNNA1    | TSVQTEDDQLIAGQ SAR         | S655      | 0.10969731 | 0.54988272 | 0.51002233 |
| P35222 | CTNNB1    | TSMGGTQQQFVEGVR            | T551      | 0.44484738 | 0.74769885 | 0.72259701 |
| P35222 | CTNNB1    | RTSMGGTQQQFVEGVR           | T551      | 0.68164855 | 1.32195101 | 0.85159594 |
| P35222 | CTNNB1    | TSMGGTQQQFVEGVR            | S552      | 0.71348295 | 1.06252319 | 0.86856453 |
| Q8WYA6 | CTNNB1    | EYAENIGDGRSPEFR            | S545      | 0.13198156 | 1.18612922 | 0.5148398  |
| O60716 | CTNND1    | GSLASLDSLRK                | S349      | 0.00486161 | 2.02122499 | 0.29204389 |
| O60716 | CTNND1    | SDFQVNLNNASR               | S847      | 0.00623892 | 1.67578408 | 0.31708848 |
| O60716 | CTNND1    | GSLASLDSLR                 | S349      | 0.01233945 | 1.57492163 | 0.36467189 |
| O60716 | CTNND1    | VGGSSVDLHR                 | S268      | 0.01290531 | 0.45560684 | 0.36582345 |
| O60716 | CTNND1    | SGDLGDMLEPK                | S920      | 0.11456513 | 0.85778578 | 0.51002233 |
| O60716 | CTNND1    | TLDRSGDLGDMLEPK            | S920      | 0.1196727  | 1.24202128 | 0.51002233 |
| O60716 | CTNND1    | SQSSHSYDDSTLPLIDR          | S864      | 0.12029288 | 0.74239266 | 0.51002233 |
| O60716 | CTNND1    | GSLASLDSLRK                | S352      | 0.14263503 | 0.718065   | 0.5281867  |
| O60716 | CTNND1    | GSLASLDSLRK                | S349,S352 | 0.15906025 | 0.50876362 | 0.54013513 |
| O60716 | CTNND1    | SLDNNYSTPNER               | S899      | 0.18797778 | 1.40249508 | 0.56058734 |
| O60716 | CTNND1    | VGGSSVDLHR                 | S269      | 0.23980222 | 0.74083673 | 0.5869514  |
| O60716 | CTNND1    | HYEDGYPGGSDNYGSLSR         | S230      | 0.36947934 | 0.45316717 | 0.67368198 |
| O60716 | CTNND1    | GSLASLDSLR                 | S346      | 0.39650548 | 1.11089071 | 0.69247075 |
| O60716 | CTNND1    | SQSSHSYDDSTLPLIDR          | Y865      | 0.74430478 | 0.89535567 | 0.88343394 |
| P17812 | CTPS1     | SGSSSPDSEITELK             | S575      | 0.10514545 | 0.89937598 | 0.50572948 |
| Q6PD62 | CTR9      | GEEGSDDETENGPCK            | S970      | 0.04802944 | 1.77417027 | 0.44612288 |
| Q6PD62 | CTR9      | KGGEFDEFVNDTDDDLPIK        | T925      | 0.26831316 | 0.45213691 | 0.60403212 |
| Q14247 | CTTN      | TQTTPVSPAPQPTTEER          | S405      | 0.1030989  | 1.35641764 | 0.50572948 |
| Q14247 | CTTN      | TQTTPVSPAPQPTTEER          | T399,S405 | 0.95742835 | 1.00376648 | 0.98250904 |
| Q14247 | CTTN      | TQTTPVSPAPQPTTEER          | T401      | 0.96946632 | 0.9950761  | 0.98659254 |
| Q14247 | CTTN      | LPSSPVYEDAASFK             | S418      | 0.98522396 | 1.00186012 | 0.99242732 |
| Q9P2B4 | CTTNBP2NL | DLSPTLIDNSAAK              | S488      | 0.13494989 | 0.80263158 | 0.52075162 |
| Q2VPK5 | CTU2      | LSQMOSPIPLTETR             | S419      | 0.36628584 | 1.68732695 | 0.67368198 |
| Q13619 | CUL4A     | GGSFALVGR                  | S10       | 0.58203084 | 1.1465448  | 0.80001994 |
| Q13620 | CUL4B     | EDFDSTSSSSTPPLQPR          | S83       | 0.11247938 | 0.72757996 | 0.51002233 |
| Q13620 | CUL4B     | SATDNGTSTTPPTSAK           | T49       | 0.34791178 | 0.72849178 | 0.6638961  |
| P39880 | CUX1      | SLTELQQPCPIEASK            | T1071     | 0.30654757 | 1.22840476 | 0.63401508 |
| P39880 | CUX1      | AASREEPIEWEF               | S1496     | 0.92319061 | 1.02159257 | 0.96716763 |
| Q2TBE0 | CWF19L2   | STFAGSPER                  | S479      | 0.39713398 | 1.44197385 | 0.69247075 |
| Q8TB03 | CXorF38   | LDSQEPGRQTPDR              | T314      | 0.22082037 | 0.89816934 | 0.58267075 |
| Q9P0U4 | CXXC1     | SENGENAPIYCICR             | S19       | 0.40201431 | 0.90087719 | 0.69725708 |
| Q5VW08 | DAB2IP    | QGPSPVSPNALDR              | S995      | 0.29254161 | 0.81712186 | 0.62260296 |
| Q9Y4D2 | DAGLA     | SPSQEILLR                  | S952      | 0.27367001 | 0.8910747  | 0.60684527 |

|        |         |                                |           |            |            |            |
|--------|---------|--------------------------------|-----------|------------|------------|------------|
| Q9UER7 | DAXX    | DGDKSPMSSLQISNEK               | S495      | 0.10078496 | 1.76451372 | 0.5018786  |
| Q9UER7 | DAXX    | SPMSSLQISNEK                   | S495      | 0.62552883 | 1.03525046 | 0.82174981 |
| Q16643 | DBN1    | LSPVLHR                        | S142      | 0.27427335 | 1.16055626 | 0.60717337 |
| Q16643 | DBN1    | SPSDSSTASTPVAEQIER             | S337      | 0.85215352 | 0.98361127 | 0.9354818  |
| Q9UJU6 | DBNL    | AMSTTSSSQPGK                   | S275      | 0.75309976 | 0.94329897 | 0.88807985 |
| Q58VW2 | DCAF6   | DGEQSPNVSLMQR                  | S336      | 0.86963235 | 0.96620724 | 0.94300301 |
| Q5TAQ9 | DCAF8   | VHDRSEEEEEEEEEEQPR             | S99       | 0.3121938  | 0.57920732 | 0.63653708 |
| Q96PD2 | DCBLD2  | TDSCSAQAQYDTPK                 | S724      | 0.52963224 | 0.89773902 | 0.7665292  |
| O15075 | DCLK1   | SPSPSPTSPGSLR                  | S337      | 0.99184371 | 0.99753622 | 0.99498584 |
| Q9NPI6 | DCP1A   | ASSPSPLTIGTPESQR               | S525      | 0.03942074 | 0.86106407 | 0.43108921 |
| Q9NPI6 | DCP1A   | ASSPSPLTIGTPESQR               | S523      | 0.10369032 | 1.30690166 | 0.50572948 |
| Q9BTE7 | DCUN1D5 | SPGVAAVAEDGGLK                 | S9        | 0.17880573 | 1.15864333 | 0.55295852 |
| Q92466 | DOB2    | SRSPLLEPEAK                    | S24       | 0.25846702 | 1.08951965 | 0.5989986  |
| Q92466 | DOB2    | SPLLEPEAK                      | S26       | 0.48459484 | 1.07857974 | 0.74167539 |
| Q92466 | DOB2    | SRSPLLEPEAK                    | S26       | 0.60868118 | 1.03446279 | 0.81409847 |
| Q92499 | DDX1    | DNTRPGANSPEMWSEAIK             | S481      | 0.23733835 | 1.17133621 | 0.58536202 |
| Q13206 | DDX10   | SNSEVEDVGTSHNR                 | S829      | 0.123064   | 0.90027894 | 0.51226381 |
| Q13206 | DDX10   | SNSEVEDVGTSHNR                 | S831      | 0.62633055 | 0.92509135 | 0.82174981 |
| Q9UHI6 | DDX20   | SYLEGSSDNQLK                   | S678      | 0.40714872 | 0.89796277 | 0.69976652 |
| Q9UHI6 | DDX20   | YQESPGIQMK                     | S714      | 0.80112234 | 0.94920043 | 0.91398245 |
| Q9NR30 | DDX21   | NEEPSSEIADPKPK                 | S121      | 0.10095195 | 1.39861352 | 0.5018786  |
| Q9NR30 | DDX21   | EEPSQNDISPK                    | S89       | 0.30418597 | 1.1359045  | 0.63187633 |
| Q9NR30 | DDX21   | KEEPSQNDISPK                   | S89       | 0.80543033 | 1.03112392 | 0.91522305 |
| Q9GZ7  | DDX24   | AQAVSEEEEEEGK                  | S82       | 0.36124787 | 1.11111111 | 0.6705258  |
| O00571 | DDX3X   | SSFFDRGSSGR                    | S92       | 0.08475687 | 2.18876371 | 0.49347121 |
| P17844 | DDX5    | GYSLLK                         | S520      | 0.71833139 | 0.90944566 | 0.87275421 |
| Q8N8A6 | DDX51   | VNDAEPGSPEAPQGK                | S83       | 0.29387258 | 1.13718821 | 0.62281368 |
| Q8TDD1 | DDX54   | IDDRDSDEEGASDR                 | S782      | 0.09030657 | 1.17487267 | 0.49630155 |
| P35659 | DEK     | EEEEEEDEDEEEEEEEK              | S32       | 0.04558668 | 0.57164538 | 0.44429794 |
| P35659 | DEK     | EPMPGPREESEEEDEDEEEEEEEK       | S32       | 0.10530932 | 1.31959863 | 0.50572948 |
| P35659 | DEK     | SLIVEGK                        | S51       | 0.97570933 | 0.99255634 | 0.98795929 |
| Q8TEH3 | DENND1A | TLRESDSAEGDEAESPEQQVR          | S538      | 0.22439067 | 1.04147794 | 0.58267075 |
| Q7Z401 | DENND4A | RGDTSTEDIQEEK                  | S922      | 0.83700933 | 1.05059071 | 0.92822004 |
| Q7Z401 | DENND4A | SDNETNLQQVWGNR                 | S1015     | 0.84564821 | 1.0193892  | 0.93222923 |
| Q5VZ89 | DENND4C | RSSLPLDHGSPAQENPESEK           | S1042     | 0.0149367  | 1.1635908  | 0.36631449 |
| Q5VZ89 | DENND4C | STLSALVR                       | S1089     | 0.22196737 | 1.14730451 | 0.58267075 |
| Q5VZ89 | DENND4C | HSQSPPEPHSPTPEPAWSSIVK         | S732,S737 | 0.94781822 | 1.0150463  | 0.9788835  |
| O75907 | DGAT1   | TGSRPSSHGGGPAEEEEVER           | T12       | 0.05876743 | 1.47483807 | 0.45298462 |
| Q9UBM7 | DHCR7   | SLDGVTNDR                      | S14       | 0.42635833 | 1.20414233 | 0.7137923  |
| O60231 | DHX16   | QQTEKPESEDEWER                 | S160      | 0.04906376 | 1.16019418 | 0.44612288 |
| O60231 | DHX16   | LLEDSEESSEETVSR                | S103      | 0.06868142 | 1.57806931 | 0.4637455  |
| Q7L2E3 | DHX30   | GSSFEMTDDDSAIR                 | S226      | 0.17772762 | 1.55438307 | 0.55295852 |
| Q6P158 | DHX57   | DLQEQAADAGSER                  | S127      | 0.66154798 | 0.93452039 | 0.8423578  |
| Q6P158 | DHX57   | GLSGEEEDDEPDCCNDER             | S132      | 0.75240877 | 1.02824019 | 0.88780932 |
| Q14562 | DHX8    | QSMMDMPIK                      | S460      | 0.70616615 | 1.05608974 | 0.86558861 |
| Q9BTC0 | DIDO1   | SPPEGDTTLFLSR                  | S1040     | 0.80660157 | 0.96386256 | 0.91593406 |
| Q9BTC0 | DIDO1   | RNSVERPAEPVAGAATPSLVEQQK       | S1456     | 0.97129622 | 1.01002397 | 0.98687477 |
| O60832 | DKC1    | AGLESGAEPGDGSDTTK              | S494      | 0.03472246 | 1.30597015 | 0.41964372 |
| O60832 | DKC1    | AGLESGAEPGDGSDTTKK             | T497      | 0.07507282 | 1.63079116 | 0.47168775 |
| O60832 | DKC1    | AGLESGAEPGDGSDTTKK             | S494      | 0.07738263 | 1.6828189  | 0.48183834 |
| Q12959 | DLG1    | EQMMNSSISSGSLR                 | S571      | 0.10423337 | 1.65047008 | 0.50572948 |
| Q9Y2H0 | DLGAP4  | QNSATESADSIYVPEAQTR            | S977      | 0.27795167 | 0.58304401 | 0.61248094 |
| Q9Y2H0 | DLGAP4  | QNSATESADSIYVPEAQTR            | S973      | 0.37765376 | 0.61737264 | 0.67666227 |
| Q9Y2H0 | DLGAP4  | ANSWQLVETPEK                   | T915      | 0.97939451 | 0.99823478 | 0.99044723 |
| Q15398 | DLGAP5  | NTASQNSILEEGETK                | S777      | 0.1658376  | 0.5112808  | 0.54308896 |
| Q15398 | DLGAP5  | SSIEDAQCPGLPLIEENHVVK          | S689      | 0.17064234 | 0.26198246 | 0.54531589 |
| Q9NPF5 | DMAP1   | DTIIDVVGAPLTPNSR               | T445      | 0.93493821 | 1.02033989 | 0.97199828 |
| P31689 | DNAJ1   | VNFPENGLSPDK                   | S335      | 0.94992361 | 0.99322011 | 0.97916383 |
| O75190 | DNAJB6  | HAPHCLSEEEGEQDRPR              | S277      | 0.19442108 | 0.93563554 | 0.56554204 |
| Q96K8  | DNAJ1   | EDAEGVAAEEEEQEGDSGEQETGATDARPR | S430      | 0.0318029  | 0.72046733 | 0.40879194 |
| Q9NVM6 | DNAJ17  | QAQAQSEEEEEESR                 | S112      | 0.24476262 | 1.14489311 | 0.58971922 |
| Q99543 | DNAJ2   | NASASFQLEDDK                   | S47       | 0.1392012  | 1.52669553 | 0.52583497 |
| Q99543 | DNAJ2   | NASASFQLEDDK                   | S47       | 0.25562175 | 1.10970598 | 0.59776597 |
| Q5F1R6 | DNAJ21  | EFGDGSDENEMEEHELK              | S283      | 0.54125522 | 0.87440003 | 0.77192278 |
| Q5F1R6 | DNAJ21  | VPEDTNLNQDSAK                  | S423      | 0.61920225 | 1.04352339 | 0.81882617 |
| Q8WXX5 | DNAJ9   | KISLEDIQAFEK                   | S109      | 0.52273011 | 0.7589619  | 0.76304189 |
| P26358 | DNMT1   | EADDDEEVDDNIPEMPSPKK           | S714      | 0.32082208 | 1.2573373  | 0.6412466  |
| P26358 | DNMT1   | EADDDEEVDDNIPEMPSPK            | S714      | 0.48173859 | 0.8990099  | 0.74108884 |
| O43598 | DNP1    | YFEADPPGQVAASPDPTT             | S169      | 0.94672931 | 0.99317529 | 0.9788835  |
| Q5QJ6  | DNTTIP2 | LYTSAPNTSQGK                   | S429      | 0.88528488 | 0.96420243 | 0.94818361 |
| Q9H7D0 | DOCK5   | APEPDLMSPTRK                   | S1756     | 0.26188114 | 1.16051661 | 0.60088416 |
| Q96HP0 | DOCK6   | SISSNPDLAVAPGSVDDEVSR          | S883      | 0.14102903 | 0.69025515 | 0.52770768 |
| Q96N67 | DOCK7   | SRLSNSNPDISGTPTSPDDEVVR        | S894,S910 | 0.00367147 | 1.47246146 | 0.29204389 |
| Q96N67 | DOCK7   | SLSNSNPDISGTPTSPDDEVVR         | T909      | 0.02488152 | 1.59396275 | 0.4040435  |
| Q96N67 | DOCK7   | SMSIDDTPR                      | S182      | 0.20199885 | 1.21771486 | 0.57040595 |
| Q96N67 | DOCK7   | SNSWVNTGGPK                    | S929      | 0.85493903 | 1.02534552 | 0.93683196 |
| Q18PE1 | DOCK7   | DHSPSPQSGSPGNSAAR              | S419      | 0.54264908 | 1.10754011 | 0.77223514 |
| Q8TEK3 | DOT1L   | VAGPADAPMDSGAEEEEK             | S374      | 0.25461079 | 0.84369287 | 0.59692907 |
| Q92785 | DPF2    | EDSQPPTVVSQR                   | S244      | 0.5750774  | 0.90542636 | 0.79622305 |
| Q02487 | DSC2    | GVSAGSVGCCSER                  | S868      | 0.02134994 | 0.75995449 | 0.37949754 |
| Q02487 | DSC2    | GVSAGSVGCCSER                  | S873      | 0.03709503 | 0.64960762 | 0.42891963 |

|        |           |                                              |           |            |            |            |
|--------|-----------|----------------------------------------------|-----------|------------|------------|------------|
| Q9H410 | DSN1      | SLHLSPEQASQYQDR                              | S81       | 0.19166428 | 0.73717278 | 0.5651429  |
| P15924 | DSP       | GGGGYTCQSGSGWDEFTK                           | T173      | 0.26096057 | 0.82948341 | 0.60088416 |
| Q8TEA8 | DTD1      | SASSGAEGDVSSEREP                             | S194      | 0.31267098 | 1.1665345  | 0.63653708 |
| Q8TEA8 | DTD1      | SASSGAEGDVSSER                               | S197      | 0.52410314 | 0.90119761 | 0.76409963 |
| Q8TEA8 | DTD1      | SASSGAEGDVSSEREP                             | S197,S204 | 0.82491391 | 1.06978671 | 0.92458845 |
| Q9Y4J8 | DTNA      | TQFEDLVPSPTSEK                               | S662      | 0.83467105 | 0.9847289  | 0.92778088 |
| Q8TDB6 | DTX3L     | EGHETPMDIDSDDSK                              | S532      | 0.12393231 | 0.87876483 | 0.5125107  |
| Q8TDB6 | DTX3L     | QQFSPMTER                                    | S204      | 0.17114733 | 0.88108108 | 0.54531589 |
| Q96G46 | DUS3L     | QENCGAQQVPAGPGTSPSSPVR                       | S272,S277 | 0.02729074 | 1.23535457 | 0.40703825 |
| Q92997 | DVL3      | SMDDDFGVVK                                   | S48       | 0.15657955 | 1.33750912 | 0.53741649 |
| Q14204 | DYNC1H1   | TDSTSDGRPAWMMR                               | S4368     | 0.28832276 | 0.87214854 | 0.62154849 |
| Q13409 | DYNC1I2   | SVSTPSEAGSQSDGDGAVGSR                        | S92       | 0.62410805 | 1.07484798 | 0.82174981 |
| Q9Y6G9 | DYNC1L1   | KPVTVSPPTTPTSPTEGEAS                         | T512      | 0.0474834  | 1.12712975 | 0.44612288 |
| Q9Y6G9 | DYNC1L1   | DFQEYVEPEDFPASPQR                            | S207      | 0.12245657 | 0.7740858  | 0.51105421 |
| Q9Y6G9 | DYNC1L1   | KPVTVSPPTTPTSPTEGEAS                         | S516      | 0.22496943 | 1.18360376 | 0.58267075 |
| Q9Y6G9 | DYNC1L1   | DFQEYVEPEDFPASPQR                            | S207      | 0.45515925 | 1.10045802 | 0.72561974 |
| Q9Y6G9 | DYNC1L1   | KPVTVSPPTTPTSPTEGEAS                         | T513,T515 | 0.55573637 | 0.89574672 | 0.78182069 |
| O43237 | DYNC1L1   | DFQDYMEPEEGCQSPQR                            | S194      | 0.28860115 | 1.07007204 | 0.62154849 |
| O43237 | DYNC1L1   | DFQDYMEPEEGCQSPQR                            | S194      | 0.46032276 | 1.23786805 | 0.72775395 |
| O43237 | DYNC1L1   | GGPASVSPSSPGTSVK                             | S407      | 0.55366811 | 1.09694584 | 0.78133566 |
| Q13627 | DYRK1A    | IYQYQSR                                      | Y321      | 0.16088368 | 1.14888683 | 0.54196083 |
| Q13627 | DYRK1A    | QGADREESPMTGVCVQSPVASS                       | S758      | 0.31830969 | 1.24042084 | 0.6389963  |
| Q96JC9 | EAF1      | DNPSPEPQLDDIKR                               | S165      | 0.27279899 | 1.54282033 | 0.60684527 |
| Q96JC9 | EAF1      | DNPSPEPQLDDIK                                | S165      | 0.33829472 | 1.05039788 | 0.65781985 |
| Q96F86 | EDC3      | SQDVAVSPQQQCSK                               | S131      | 0.86165505 | 0.97788785 | 0.9398826  |
| Q6P2E9 | EDC4      | DSQDASAEQSDHDEVASLASASGGFGTK                 | S871      | 0.2260465  | 0.34540871 | 0.58267075 |
| P24534 | EEF1B2    | YGPADVEDTTGSGATDSK                           | S95       | 0.01163458 | 1.16232772 | 0.3634964  |
| P24534 | EEF1B2    | DDDDIDLFGSDDEESEAK                           | S106      | 0.25769116 | 0.25004344 | 0.59892773 |
| P29692 | EEF1D     | KPATPAEDDEDDIDLFGSDNEEEDK                    | S162      | 0.23136406 | 0.42010204 | 0.58402227 |
| P29692 | EEF1D     | ATAPQTOHVSPMR                                | S133      | 0.93915906 | 1.01028807 | 0.97418985 |
| Q96C19 | EFHD2     | ADLNQIGIGEPQSPSR                             | S74       | 0.52875079 | 0.87395934 | 0.76628484 |
| Q96C19 | EFHD2     | RADLNQIGIGEPQSPSR                            | S76       | 0.76057729 | 0.93746168 | 0.88975212 |
| Q96C19 | EFHD2     | RADLNQIGIGEPQSPSR                            | S74       | 0.82417749 | 1.02839978 | 0.92458845 |
| Q8ND1  | EHBP1     | APAPPVLSPK                                   | S408      | 0.18362866 | 0.76052813 | 0.55832805 |
| Q8ND1  | EHBP1     | TSGSDDPGICSNTDSTQAQVLLGK                     | S664      | 0.45590129 | 0.80856833 | 0.72561974 |
| Q8ND1  | EHBP1     | KPSEDEVLNK                                   | S1058     | 0.59309587 | 1.05202888 | 0.80595083 |
| Q8N3D4 | EHBP1L1   | ANEAGGQVGPAPRPPETSPEMR                       | S285      | 0.38684059 | 1.0987074  | 0.6823115  |
| Q96KQ7 | EHMT2     | LNSGGGLSEELGSAR                              | S232      | 0.54078362 | 0.89723273 | 0.7718622  |
| O14681 | EI24      | FSPHPSPAK                                    | S326      | 0.0220066  | 0.8029623  | 0.37964331 |
| O14681 | EI24      | FSPHPSPAK                                    | S326,S330 | 0.14941891 | 0.77821394 | 0.53498933 |
| Q9BY44 | EIF2A     | SDKSPDLAPTPAPQSTPR                           | S506      | 0.13433796 | 1.25972691 | 0.52045275 |
| Q9BY44 | EIF2A     | SPDLAPTPAPQSTPR                              | S506      | 0.71027929 | 0.95114007 | 0.86779668 |
| Q9UI10 | EIF2B4    | ASPSTAGETPSGVK                               | S130      | 0.52794239 | 1.06861698 | 0.76614217 |
| Q14152 | EIF3A     | ERLESLNQR                                    | S584      | 7.89E-06   | 0.248901   | 0.02545314 |
| Q14152 | EIF3A     | LGDSSLSR                                     | S882      | 0.02844168 | 0.50188842 | 0.40710444 |
| P55884 | EIF3B     | TEPAAEAAASGPSSESPPPAAEELPGSHAEPVPAQGEAPGEQAR | S83       | 0.37622458 | 0.6987946  | 0.67615626 |
| Q99613 | EIF3C     | QNPEQSADEDAEK                                | S166      | 0.22233845 | 1.11268091 | 0.58267075 |
| Q99613 | EIF3C     | QPLLLSEDEEDTK                                | S39       | 0.50538599 | 1.02671756 | 0.75314323 |
| O75822 | EIF3J     | VLTPEEQQLADK                                 | T109      | 0.93804177 | 0.98692895 | 0.97418985 |
| P38919 | EIF4A3    | LDYQGHVVAGTPGR                               | T163      | 0.30337731 | 0.884612   | 0.63144863 |
| P23588 | EIF4B     | YAALSVDGEDENEGEDYAE                          | S597      | 0.25208984 | 0.69754768 | 0.59589813 |
| P23588 | EIF4B     | EEDCHSPTSKPPKPDQPLK                          | S459      | 0.37304493 | 0.62318841 | 0.67495398 |
| P23588 | EIF4B     | AFGSGYR                                      | S283      | 0.42794942 | 1.17732558 | 0.7137923  |
| P23588 | EIF4B     | ARPATDSFDYPPR                                | S207      | 0.5116226  | 1.22126313 | 0.7574445  |
| P23588 | EIF4B     | SLNETLNK                                     | S445      | 0.80662389 | 1.02893519 | 0.91593406 |
| Q9NRA8 | EIF4ENIF1 | ASEENLLSSSSVPSADRSPTTNSK                     | S752      | 0.34679316 | 1.14331723 | 0.66293814 |
| Q04637 | EIF4G1    | AALSEEELEK                                   | S1238     | 0.0031826  | 1.47819179 | 0.29204389 |
| P78344 | EIF4G2    | FSPMTGR                                      | S395      | 0.61812454 | 0.91947291 | 0.81837121 |
| O60841 | EIF5B     | VEMYSGSDDDDFNK                               | S135      | 0.00073323 | 2.18038529 | 0.21503578 |
| O60841 | EIF5B     | KQSFDDNDSELEEDK                              | S107      | 0.03366702 | 1.52501263 | 0.41612951 |
| O60841 | EIF5B     | KWDGSEDEEDNSK                                | S164      | 0.1046145  | 1.26381579 | 0.50572948 |
| O60841 | EIF5B     | KQSFDDNDSELEEDK                              | S113      | 0.2977487  | 1.45802157 | 0.62494294 |
| O60841 | EIF5B     | QSFDDNDSELEEDK                               | S113      | 0.34151527 | 1.04925651 | 0.66090478 |
| O60841 | EIF5B     | KQSFDDNDSELEEDK                              | S107,S113 | 0.35505435 | 0.63453823 | 0.66702539 |
| O60841 | EIF5B     | NKPGPNIESGNEDDASFK                           | S214      | 0.40561331 | 1.07712467 | 0.6993632  |
| Q5R3F8 | ELFN2     | QLSADAAVTR                                   | S619      | 0.36460294 | 1.16366877 | 0.67327366 |
| Q5R3F8 | ELFN2     | MASIPSMIGEK                                  | S472      | 0.43694648 | 0.82564737 | 0.71982749 |
| P41970 | ELK3      | AASPVLLSSNSQK                                | S396      | 0.78935197 | 0.96720645 | 0.90808284 |
| Q9HC35 | EML4      | APVSSSTESVQSNTPTPPSQPLNETAEEESR              | T897,T899 | 0.03159064 | 0.4684814  | 0.40879194 |
| Q9HC35 | EML4      | APVSSSTESVQSNTPTPPSQPLNETAEEESR              | T899      | 0.82645263 | 0.90542913 | 0.92458845 |
| Q09472 | EP300     | TEIKEEEDQPSTSATQSSPAPGQSK                    | S1037     | 0.18981426 | 1.61109481 | 0.56436941 |
| Q09472 | EP300     | EEEDQPSTSATQSSPAPGQSK                        | S1038     | 0.79986714 | 0.95601419 | 0.91398245 |
| Q9H4G0 | EPB41L1   | GACSTPDMPOFEPVK                              | T686      | 0.04936993 | 0.73723588 | 0.44612288 |
| Q9H4G0 | EPB41L1   | SLSPIIGK                                     | S784      | 0.08504959 | 0.90573013 | 0.49347121 |
| Q9H4G0 | EPB41L1   | LPSSPASPSPK                                  | S544      | 0.11115503 | 0.77203727 | 0.51002233 |
| Q9H4G0 | EPB41L1   | SLDGAEFRPASPVSSENHDAGPDGDK                   | S441      | 0.13620312 | 0.85212787 | 0.52288253 |
| Q9H4G0 | EPB41L1   | HQASINELK                                    | S510      | 0.18633796 | 0.78724605 | 0.55994868 |
| Q9H4G0 | EPB41L1   | SLDGAEFRPASPVSSENHDAGPDGDK                   | S430,S441 | 0.43980852 | 0.83041663 | 0.72004085 |
| Q9H4G0 | EPB41L1   | SEAEEGEVTRPTK                                | T475      | 0.50296209 | 1.07968221 | 0.75222795 |
| P21709 | EPHA1     | LPSLSGSDGIPYR                                | S910      | 0.25500839 | 2.57195796 | 0.59742705 |
| P29317 | EPHA2     | LPSTSGSEGVPPR                                | S899      | 0.14574813 | 1.68157034 | 0.53170891 |



|        |          |                          |           |            |            |            |
|--------|----------|--------------------------|-----------|------------|------------|------------|
| P29317 | EPHA2    | LPSTSGSEGVPPFR           | S897      | 0.14631428 | 0.66634383 | 0.53170891 |
| P29317 | EPHA2    | QSPEDVYFSK               | Y575      | 0.16185073 | 0.53575869 | 0.54196083 |
| P29317 | EPHA2    | ARQSPEDVYFSK             | S570      | 0.20066478 | 1.19890753 | 0.56975265 |
| P29317 | EPHA2    | VLEDDPEATYTTSGGK         | Y772      | 0.26340659 | 0.55659871 | 0.60212177 |
| P29317 | EPHA2    | TYVDPHTYEDPNQAVLK        | T593      | 0.28362727 | 0.34109939 | 0.61816331 |
| P29317 | EPHA2    | VLEDDPEATYTTSGGK         | S775      | 0.37138017 | 1.27814138 | 0.67459033 |
| P29323 | EPHB2    | FLEDDTSDPTYTSALGGK       | S776      | 0.03771975 | 0.83232625 | 0.43108921 |
| Q9Y6I3 | EPN1     | SPGAFDMSGVR              | S435      | 0.26225818 | 0.75288779 | 0.60088416 |
| P58107 | EPPK1    | AEAEAGSPRPDPR            | S2508     | 0.05434751 | 2.06189684 | 0.44840167 |
| P58107 | EPPK1    | QVSASELHTSGILGPETLR      | S2716     | 0.10127804 | 0.37123312 | 0.5018786  |
| P58107 | EPPK1    | TLDELSQLGTTTVK           | T1543     | 0.92052621 | 0.971481   | 0.96635781 |
| P07814 | EPRS     | EYIPGQPPLSQSSDSSPTR      | S886      | 0.03931214 | 1.22952962 | 0.43108921 |
| P07814 | EPRS     | EYIPGQPPLSQSSDSSPTR      | S882,S886 | 0.71253724 | 1.0663039  | 0.86856453 |
| P42566 | EPS15    | LDSPDPFK                 | S796      | 0.38320167 | 0.8914239  | 0.67941113 |
| P42566 | EPS15    | LNDPFPQPPGNDSPK          | S814      | 0.95957881 | 1.00529661 | 0.98250904 |
| Q9UBC2 | EPS15L1  | GSFGAMD DPFK             | S593      | 0.43480699 | 0.90537521 | 0.71875302 |
| Q12929 | EPS8     | DSVSSVSDISQYR            | S58       | 0.04585531 | 0.65589205 | 0.44556992 |
| Q12929 | EPS8     | SQMEEVQDELHHR            | S685      | 0.10551324 | 0.5888087  | 0.50572948 |
| Q8TE68 | EPS8L1   | DRSPAETPPLQR             | S182      | 0.61802568 | 1.11506241 | 0.81837121 |
| Q8TE68 | EPS8L1   | APEPQLSPGSDASEVR         | S631      | 0.7546927  | 1.08156828 | 0.8884671  |
| Q9H6S3 | EPS8L2   | HSPTEPTPPGDALPPVSSPHTHR  | S463,T483 | 0.96384265 | 0.99046893 | 0.98250904 |
| P21860 | ERBB3    | GESIEPLDPSEK             | S686      | 0.15025146 | 0.86477718 | 0.53597354 |
| P28715 | ERCC5    | ELTPASPTCTNSVSK          | S526      | 0.01881451 | 1.40694006 | 0.37230658 |
| P28715 | ERCC5    | NAPAAVDEGSISPR           | S384      | 0.05971009 | 1.25056332 | 0.45298462 |
| Q2NKX8 | ERCC6L   | IVSDGEDEDDDFK            | S1028     | 0.24509993 | 0.9117548  | 0.58971922 |
| P50548 | ERF      | GSVSDCS DGTSELEPLGEDPR   | S187      | 0.3987641  | 0.86584822 | 0.69385814 |
| Q5FWF5 | ESCO1    | LDSQVSPK                 | S412      | 0.1088571  | 0.81578947 | 0.51002233 |
| Q56N19 | ESCO2    | VLSEPIGPESPSSTECPR       | S512      | 0.21202481 | 0.59129592 | 0.57818431 |
| P11474 | ESRRA    | GSSETETEPVALAPGPAPTR     | S27       | 0.28681668 | 0.71832292 | 0.62030418 |
| P14921 | ETS1     | LGGQDSFESIESYDSCDR       | S251      | 0.14340164 | 0.63574971 | 0.5281867  |
| Q6ZN32 | ETV3L    | FNFSK                    | S122      | 0.02639936 | 0.37192529 | 0.40703825 |
| Q9H8M9 | EVA1A    | NVFTSAEELER              | S114      | 0.11075662 | 1.27610719 | 0.51002233 |
| Q06265 | EXOSC9   | APIDTSDVEEK              | S306      | 0.9905928  | 1.00110193 | 0.99498584 |
| Q13158 | FADD     | SGAMSPMSWNSDASTSEAS      | S194      | 0.43512853 | 0.92388759 | 0.71875302 |
| Q9UNN5 | FAF1     | TPSGEFLER                | S582      | 0.14649314 | 1.20558771 | 0.53170891 |
| Q5T9C2 | FAM102A  | SSSLDLTHR                | S251      | 0.59514969 | 1.10048778 | 0.8067029  |
| Q9BTL3 | FAM103A1 | RPPEPPIVEEWNRSR          | S36       | 0.21139098 | 1.22120594 | 0.57694357 |
| Q6P1L5 | FAM117B  | SASWGSTDQLK              | S273      | 0.4047147  | 0.89980126 | 0.6993632  |
| Q7Z309 | FAM122B  | RIDFTVPVSPAPSPTTR        | S115,S119 | 0.36784193 | 1.09375    | 0.67368198 |
| Q7Z309 | FAM122B  | IDFTVPVSPAPSPTTR         | S115,S119 | 0.83956608 | 0.98515072 | 0.92977692 |
| Q9BYI3 | FAM126A  | NAVTSMSIR                | S321      | 0.2131696  | 0.76965858 | 0.5798357  |
| Q96TA1 | FAM129B  | AAPEASSPPASPLQHLLPGK     | S692,S696 | 0.19284911 | 0.8516147  | 0.5651429  |
| Q8NC44 | FAM134A  | QALDSEEEEDVAAK           | S385      | 0.02924853 | 1.18140104 | 0.40710444 |
| Q86VR2 | FAM134C  | GQTPLTEGSELDLGHSDPEESFAR | S320      | 0.0444446  | 1.53674352 | 0.44293212 |
| Q6UWZ7 | FAM175A  | GFGYRSRPTF               | S406      | 0.12374427 | 1.7221252  | 0.5125107  |
| P78312 | FAM193A  | LVLAE SPQPK              | S1144     | 0.96682205 | 0.99322545 | 0.98452271 |
| C9JLW8 | FAM195B  | SPSSSEIFTPAHEENVR        | S21       | 0.41911971 | 0.91384262 | 0.709009   |
| Q641Q2 | FAM21A   | TPSDDEEDNLFAPPK          | S333      | 0.1472688  | 1.205158   | 0.53170891 |
| Q641Q2 | FAM21A   | LAAQESSETEDMSVPR         | S1054     | 0.45949741 | 1.10077646 | 0.72770675 |
| Q641Q2 | FAM21A   | AVASPEATVSQTDENK         | S498      | 0.56299191 | 0.89382954 | 0.78599368 |
| Q641Q2 | FAM21A   | SRPTSFADELAAR            | S288      | 0.73532148 | 1.05786021 | 0.87923537 |
| Q641Q2 | FAM21A   | ETVSEAPPLLFSDDEEK        | S728      | 0.79138053 | 0.97350207 | 0.90950965 |
| Q9NYF3 | FAM53C   | SRSQPCDL DAR             | S273      | 0.05373708 | 0.8248146  | 0.44612288 |
| Q8N5J2 | FAM63A   | VLSLQGR                  | S441      | 0.05254096 | 2.38943604 | 0.44612288 |
| Q7L4E1 | FAM73B   | NPETA SEPLSEPE SQR       | S224      | 0.33777696 | 1.20617796 | 0.65781985 |
| Q5HYJ3 | FAM76B   | ISNLSPEEEQGLWK           | S193      | 0.31063893 | 1.1597984  | 0.63653708 |
| Q6ZRV2 | FAM83H   | GSPTPGFSTR               | S881      | 0.06179782 | 0.69014085 | 0.45713107 |
| Q6ZRV2 | FAM83H   | RGSPVPPVPER              | S914      | 0.09792405 | 0.69507692 | 0.5018786  |
| Q6ZRV2 | FAM83H   | RSSPVPVPER               | S925      | 0.12168499 | 0.81251032 | 0.51047563 |
| Q6ZRV2 | FAM83H   | LDYVPSSASR               | S516      | 0.13446601 | 0.59170282 | 0.52045275 |
| Q6ZRV2 | FAM83H   | GSPTSAYPER               | S870      | 0.19327896 | 0.81525215 | 0.5651429  |
| Q6ZRV2 | FAM83H   | HGSDPAFAPGPR             | S523      | 0.20076125 | 0.79310345 | 0.56975265 |
| Q6ZRV2 | FAM83H   | RGSPPTGFIEQK             | S892      | 0.29322831 | 0.8687291  | 0.62260296 |
| Q6ZRV2 | FAM83H   | VPVPGPGSGGNGPER          | S647      | 0.38266259 | 0.85474109 | 0.67941113 |
| Q6ZRV2 | FAM83H   | RGSPPTGFIEQK             | T894      | 0.39095093 | 0.73020076 | 0.68730666 |
| Q6ZRV2 | FAM83H   | KGSPTPGFSTR              | S881      | 0.73943639 | 1.09424084 | 0.88092337 |
| Q6ZRV2 | FAM83H   | RLSLQGGDSTEAAATEER       | S1003     | 0.80227626 | 1.01383043 | 0.91398245 |
| Q96KN1 | FAM84B   | TTPPPGRPPASSEEDGEAVAH    | T289      | 0.00737003 | 1.38146811 | 0.31708848 |
| Q96KN1 | FAM84B   | LTHLSYK                  | S12       | 0.78381734 | 0.93457011 | 0.90598164 |
| Q9HB96 | FANCE    | SLESADGGGSASPIK          | S249      | 0.07237408 | 0.86092378 | 0.46528233 |
| Q9NV11 | FANCI    | TIETSPLSR                | S407      | 0.98100442 | 1.00440006 | 0.99052277 |
| Q9Y4F1 | FARP1    | VSAGEPGSHSPAPR           | S427      | 0.20665288 | 1.18385827 | 0.57287379 |
| Q9Y4F1 | FARP1    | LGAPENS GISTLER          | S23       | 0.27904891 | 0.79119094 | 0.61249442 |
| Q94887 | FARP2    | DSSSSLTD PQVSYVK         | S427      | 0.00340612 | 0.71814595 | 0.29204389 |
| P49327 | FASN     | LGMLSPEGTCK              | S207      | 0.13012202 | 1.19202567 | 0.5125107  |
| P49327 | FASN     | ADEASELACPTPK            | T2204     | 0.85959075 | 1.01956522 | 0.93886034 |
| Q9NYQ8 | FAT2     | VGASDGVFR                | S2457     | 0.14010845 | 0.72008038 | 0.52770768 |
| Q9HCM7 | FBRSL1   | RPLEAGSPGQDLEPACD GAR    | S141      | 0.15737795 | 1.24003738 | 0.53741649 |
| Q9UKT5 | FBXO4    | SGTNSPPPPFSDWGR          | S12       | 0.16553219 | 1.19476082 | 0.54308896 |
| Q5XUX1 | FBXW9    | TWDDSDPESETDPDAQAK       | S18       | 0.95697807 | 1.01483997 | 0.98250904 |
| Q0JRZ9 | FCHO2    | NLSNEELTK                | S403      | 0.47123828 | 1.18376229 | 0.73369435 |

|        |         |                                   |           |            |            |            |
|--------|---------|-----------------------------------|-----------|------------|------------|------------|
| Q96AC1 | FERMT2  | LSIMTSENHLNNSDK                   | S332      | 0.10019133 | 1.16460156 | 0.5018786  |
| Q96AC1 | FERMT2  | LSIMTSENHLNNSDK                   | S339      | 0.68406846 | 0.89195248 | 0.85273769 |
| Q6ZV73 | FGD6    | SSQLGDTTTHLSSGQK                  | S652      | 0.24349267 | 0.49342243 | 0.58932994 |
| Q6ZV73 | FGD6    | AESLDDQMLSR                       | S721      | 0.592847   | 0.93685912 | 0.80595083 |
| Q6ZV73 | FGD6    | AMCNETTSFEK                       | S410      | 0.7185478  | 1.08441787 | 0.87275421 |
| Q6ZV73 | FGD6    | GVSSFDMPK                         | S553      | 0.7697754  | 1.0326306  | 0.89575562 |
| Q6ZV73 | FGD6    | IEFADLSPSSFEK                     | S231      | 0.98954256 | 1.00306137 | 0.99486133 |
| O95684 | FGFR10P | GPTTGGALDLSDVHSPKSPGK             | S156,S160 | 0.71835602 | 1.03888889 | 0.87275421 |
| Q9C0D6 | FHDC1   | SSEENDVELTK                       | S499      | 0.06552765 | 0.67431331 | 0.46184181 |
| Q6UN15 | FIP1L1  | DHSPTPSVFNSDEER                   | S492      | 0.20081614 | 1.0677016  | 0.56975265 |
| Q6UN15 | FIP1L1  | ERDHSPTPSVFNSDEER                 | S492      | 0.25292787 | 1.11472448 | 0.59589813 |
| Q6UN15 | FIP1L1  | DHSPTPSVFNSDEER                   | S492,S500 | 0.3621342  | 0.66808199 | 0.67098346 |
| Q5T1M5 | FKBP15  | SSLSGDEEDELK                      | S1164     | 0.00221984 | 1.31484258 | 0.29204389 |
| Q5T1M5 | FKBP15  | SSLSGDEEDELK                      | S1162     | 0.01244647 | 2.66837705 | 0.36467189 |
| P62942 | FKBP1A  | GVQVETISPGDGR                     | S9        | 0.91983699 | 1.00582904 | 0.96626315 |
| Q02790 | FKBP4   | SNTAGSQSQVETEA                    | S451      | 0.93081445 | 1.01725678 | 0.96968952 |
| Q8NFG4 | FLCN    | AHSPAEGASVESSSPGPK                | S62       | 0.09506458 | 1.18248773 | 0.5018786  |
| Q13045 | FLII    | NAEAVLQSPGLSGK                    | S856      | 0.47359922 | 1.09242054 | 0.73588623 |
| P21333 | FLNA    | CSGPGLSPGMVR                      | S1459     | 0.3832476  | 1.24678738 | 0.67941113 |
| P21333 | FLNA    | AFGPGQLQGSAGSPAR                  | S1084     | 0.89915751 | 1.03800676 | 0.95668935 |
| O75369 | FLNB    | YADEEIPRSPFK                      | S1505     | 0.49083235 | 1.06354697 | 0.7461947  |
| O75369 | FLNB    | LDVTILSPSR                        | S983      | 0.88465292 | 1.05651054 | 0.94782143 |
| Q96PY5 | FMNL2   | LLEQALMEQDQPKSPSHK                | S1016     | 0.25152181 | 1.70942772 | 0.59589813 |
| Q5TON5 | FNBP1L  | ESPEGSYDDANQEV                    | S501      | 0.26576162 | 0.71484375 | 0.60298408 |
| Q5TON5 | FNBP1L  | TISDGTISASK                       | S295      | 0.68143913 | 0.97288136 | 0.85159594 |
| Q8N3X1 | FNBP4   | ALEEGDGSVSGSSPR                   | S432      | 0.44896369 | 1.10030432 | 0.72381652 |
| Q53EP0 | FNDC3B  | LNSSPSSIYK                        | S208      | 0.51917472 | 0.96092811 | 0.76095304 |
| P15407 | FOSL1   | RRPCEQISPEEER                     | S101      | 0.82585805 | 1.01596639 | 0.92458845 |
| P15408 | FOSL2   | QEPLLEEDSPSSSAGLDK                | S232      | 0.3094808  | 1.17288557 | 0.63653708 |
| P15408 | FOSL2   | SPPAPGLQPMR                       | S200      | 0.32232065 | 1.20080727 | 0.64145984 |
| Q9Y261 | FOXA2   | AAAGAAQSAQALGEEAAGPASET           | S303,S306 | 0.32735397 | 1.33255086 | 0.64787969 |
| Q9Y261 | FOXA2   | AAAGAAQSAQALGEEAAGPASET           | T301      | 0.41844981 | 1.19515885 | 0.70899112 |
| Q9UPW0 | FOXJ3   | VTLYNTDQDQSDSPR                   | S223      | 0.45257453 | 1.08185024 | 0.72537341 |
| P85037 | FOXK1   | EEAPASPLRPLYPQISPLK               | S213,S223 | 0.06004247 | 0.54646988 | 0.45298462 |
| P85037 | FOXK1   | SGGLQTPCLSRREGSPIPHDFEFGSK        | S441,S445 | 0.4168582  | 1.19943396 | 0.70815406 |
| P85037 | FOXK1   | SGGLQTPCLSR                       | S441      | 0.67496591 | 0.96022727 | 0.84997288 |
| Q01167 | FOXK2   | EGSPAPLEPEPGAQPK                  | S398      | 0.40557149 | 1.09439587 | 0.6993632  |
| Q8IVH2 | FOXP4   | RDSSSHEETPGSHPLYGHGECK            | S291      | 0.11926396 | 0.47234264 | 0.51002233 |
| Q8IVH2 | FOXP4   | RDSSSHEETPGSHPLYGHGECK            | S293      | 0.13222131 | 0.54535975 | 0.51515209 |
| Q6PJQ5 | FOXR2   | VVESLSSSEQSPQLK                   | S139      | 0.3611583  | 1.1424406  | 0.6705258  |
| Q72616 | FRMD5   | ESEASTPATEVEALGGELR               | S462      | 0.09396428 | 0.63913089 | 0.5018786  |
| Q96NE9 | FRMD6   | GQSTDSLPTICR                      | S525      | 0.09323113 | 0.86343612 | 0.5018786  |
| Q96NE9 | FRMD6   | HSLSLDDIR                         | S544      | 0.66180893 | 0.95781466 | 0.8423578  |
| O94915 | FRYL    | SNTLDIMDGR                        | T1959     | 0.05228927 | 0.59427674 | 0.44612288 |
| O94915 | FRYL    | SNTLDIMDGR                        | S1957     | 0.95987582 | 0.99479167 | 0.98250904 |
| Q8IY81 | FTSJ3   | GTEASSGTEAATGLEEEK                | S598      | 0.14041923 | 1.10298364 | 0.52770768 |
| Q8IY81 | FTSJ3   | SDDDGFEIVPIEDPAK                  | S644      | 0.45348089 | 1.06142241 | 0.72537341 |
| Q8IY81 | FTSJ3   | QQLPQTPPSCLK                      | T573      | 0.61049671 | 1.12882737 | 0.81488009 |
| Q96AE4 | FUBP1   | QQAAYYAQTSPQGMPPAPQGG             | S630      | 0.78957606 | 0.95454912 | 0.90808284 |
| Q9BWH2 | FUNDC2  | SNQIPTEV                          | S151      | 0.15809256 | 0.70924574 | 0.53911902 |
| P51114 | FXR1    | RGNPNYSGYGTNSELNPSETESER          | S409      | 0.35309218 | 0.7689665  | 0.66702539 |
| P51114 | FXR1    | DPDSNPYSLLDNTESDQTADTASESHSTNR    | T491      | 0.35608663 | 0.57215599 | 0.66749635 |
| P51114 | FXR1    | DPDSNPYSLLDNTESDQTADTASESHSTNR    | S485      | 0.3757597  | 0.43826964 | 0.67604172 |
| P51114 | FXR1    | DPDSNPYSLLDNTESDQTADTASESHSTNR    | S499      | 0.38511494 | 0.5559336  | 0.68072033 |
| P51114 | FXR1    | RGNPNYSGYGTNSELNPSETESER          | S406,S409 | 0.54383427 | 0.81253661 | 0.77269004 |
| P51116 | FXR2    | TGGPAYGPSSDVSTASETESEK            | S453      | 0.41982192 | 0.6638624  | 0.70908142 |
| P06241 | FYN     | LIEDNEY                           | Y420      | 0.64169532 | 0.91264559 | 0.83055345 |
| O60353 | FZD6    | EQDCGEPASPAASISR                  | S620      | 0.6688858  | 1.03730445 | 0.84620611 |
| Q9UM11 | FZR1    | RSSPDDGNDVSPYSLSPVSNK             | S138      | 0.17224439 | 1.24645336 | 0.54690986 |
| Q13283 | G3BP1   | SSSPAPADIAQTVQEDLR                | S232      | 0.39212427 | 0.67779535 | 0.68861889 |
| Q13283 | G3BP1   | SSSPAPADIAQTVQEDLR                | S230      | 0.73954558 | 1.11652844 | 0.88092337 |
| Q9UN86 | G3BP2   | STTPPPAEPVSLPQEPK                 | S225      | 0.29495202 | 0.7427729  | 0.6239444  |
| Q9UN86 | G3BP2   | STTPPPAEPVSLPQEPK                 | T227      | 0.45112976 | 0.79016765 | 0.72422173 |
| O14976 | GAK     | QPGSTAQYDAGAGSPEAEPTDSDSPSSADASR  | S780      | 0.29294741 | 1.15400759 | 0.62260296 |
| Q14C86 | GAPVD1  | SRSSDIVSSVR                       | S902      | 0.27285703 | 1.13973269 | 0.60684527 |
| Q14C86 | GAPVD1  | LQELESCLGTSDDTDV                  | T747      | 0.63896658 | 0.88485387 | 0.83050209 |
| Q14C86 | GAPVD1  | LQELESCLGTSDDTDV                  | S746      | 0.84351447 | 1.01918775 | 0.93159113 |
| Q9H706 | GAREM   | SGSPDLSAQYFVK                     | S757      | 0.51348127 | 0.90825071 | 0.75868535 |
| Q99501 | GAS2L1  | RYSGDSASSASSAQSGPLGTR             | S352      | 0.19696835 | 1.03395465 | 0.56846559 |
| Q92908 | GATA6   | NTSPPTQPTASGAGAPVMTGAGESTNPENSELK | T534      | 0.22177144 | 1.71092881 | 0.58267075 |
| Q86YP4 | GATAD2A | RPPSPDIVLSDNEQPSSPR               | S100,S114 | 0.48162599 | 1.18889559 | 0.74108884 |
| Q8WXI9 | GATAD2B | LTPSPDIIVLSDNEASSPR               | S129      | 0.41662284 | 1.33774045 | 0.70812712 |
| Q8WXI9 | GATAD2B | LTPSPDIIVLSDNEASSPR               | S135      | 0.81112638 | 1.08827145 | 0.91877983 |
| Q92538 | GBF1    | AASSSSPGSPVASSPSR                 | S1784     | 0.17251704 | 0.89184896 | 0.54723693 |
| Q92538 | GBF1    | ADAPDAGAQSDSELSYHQNDVSLDR         | S1298     | 0.29079066 | 1.13730804 | 0.62187612 |
| Q92538 | GBF1    | GYTSDSEVYTDHGRPGK                 | S1318     | 0.63056874 | 0.8972332  | 0.82390229 |
| P16383 | GCFC2   | RESEDDPESEDDHEK                   | S180      | 0.22715974 | 1.3741747  | 0.58267075 |
| Q92616 | GCN1L1  | AVMLLHTHTITSR                     | T956,T958 | 0.75982979 | 0.93537642 | 0.88973173 |
| Q9BZD3 | GCOM2   | VSSQAEDTSSFDNLFIDR                | S179      | 0.09614305 | 0.65535122 | 0.5018786  |
| Q8TEQ6 | GEMIN5  | ENSGPVENGVSQEGEEQAREPELPCGLAPAVSR | S778      | 0.27460197 | 0.48817925 | 0.60717337 |
| Q8TEQ6 | GEMIN5  | ENSGPVENGVSQEGEEQAR               | S778      | 0.55191419 | 0.92290869 | 0.78076677 |

|        |          |                                     |             |            |            |            |
|--------|----------|-------------------------------------|-------------|------------|------------|------------|
| Q8TEQ6 | GEMIN5   | LESIDGNEEESMK                       | S757        | 0.72278083 | 0.87161059 | 0.87410666 |
| Q06210 | GFPT1    | VDSTTCLFPVEEK                       | S261        | 0.29910727 | 0.75681893 | 0.62631205 |
| Q9UJ14 | GGT7     | LPSSSEMGSQDGSPLR                    | S72         | 0.31017703 | 1.22550336 | 0.63653708 |
| Q6Y7W6 | GIGYF2   | WRPHSPDGPR                          | S236        | 0.35873578 | 1.14153202 | 0.66991323 |
| Q6Y7W6 | GIGYF2   | VGVEASEETPQTSSSSARPGTSPDHQSQEASQFER | S384        | 0.79983374 | 0.91878173 | 0.91398245 |
| Q6Y7W6 | GIGYF2   | VGVEASEETPQTSSSSARPGTSPDHQSQEASQFER | T382        | 0.86765554 | 0.94345352 | 0.94208744 |
| Q9Y248 | GINS2    | TNLQPLESTQSQDF                      | S182        | 0.42673149 | 0.92501274 | 0.7137923  |
| Q9Y2X7 | GIT1     | HGSGADSDYENTQSGDPLLGLLEGK           | S592        | 0.44829116 | 0.93604136 | 0.72373014 |
| Q53G57 | GLE1     | SPDASSAFSPASPATPNGTK                | S88         | 0.15127696 | 1.52423458 | 0.53741649 |
| P10075 | GLI4     | SPGSQAPDEGAGGALR                    | S86         | 0.17050646 | 1.23003195 | 0.54531589 |
| P49915 | GMPS     | TLNMTTSPEEK                         | S332        | 0.08590321 | 1.16476775 | 0.49557355 |
| P36915 | GNL1     | EEQTDTSDGESVTHHIR                   | S51         | 0.00915321 | 1.28600134 | 0.33303827 |
| P36915 | GNL1     | REEQTDTSDGESVTHHIR                  | S51         | 0.0747749  | 1.21685304 | 0.47168775 |
| P36915 | GNL1     | REEQTDTSDGESVTHHIR                  | T50         | 0.30355541 | 1.1689038  | 0.63144863 |
| Q13439 | GOLGA4   | TSSFTEQLDEGTPNR                     | S40         | 0.22587133 | 1.13342898 | 0.58267075 |
| Q13439 | GOLGA4   | VPSVESLFR                           | S71         | 0.47616745 | 1.17182167 | 0.73745376 |
| Q13439 | GOLGA4   | EENPESDGEPVVEDGTSVK                 | S266        | 0.75057786 | 1.02529995 | 0.88774061 |
| Q3T8J9 | GON4L    | TCPVHESPSGIDTSETSPK                 | S2107       | 0.06285798 | 0.82891832 | 0.45900028 |
| Q3T8J9 | GON4L    | VEHSPGPPADAECQEGLENSACR             | S1268       | 0.86683941 | 0.97891566 | 0.94208744 |
| Q9NWQ4 | GPATCH2L | SPSSEWLVR                           | S447        | 0.23265524 | 1.24927725 | 0.58402949 |
| Q5T310 | GPATCH4  | DLESCDDDNQGSK                       | S130        | 0.36303353 | 1.21246613 | 0.67152877 |
| Q9UKJ3 | GPATCH8  | GPKPEPPGSGSPAPPR                    | S740        | 0.70123943 | 1.04009034 | 0.86274503 |
| Q9HCN4 | GNP1     | GTLDEEDEEADSDTDDIDHR                | S338        | 0.22942943 | 0.6544702  | 0.58267075 |
| Q9Y653 | GPR56    | LPISGSTSSSR                         | S687        | 0.11714524 | 1.66044054 | 0.51002233 |
| Q8NFJ5 | GPRC5A   | AHAWPSPYK                           | S345        | 0.05886162 | 0.66059917 | 0.45298462 |
| Q9NQ84 | GPRC5C   | AFSMDPEVAAK                         | S344        | 0.23716388 | 0.65408476 | 0.58536202 |
| Q9NQ84 | GPRC5C   | VPSEGAYDIILPR                       | Y387        | 0.72152657 | 1.04656055 | 0.87405855 |
| Q7Z2K8 | GPRIN1   | SPSGAGEGASCSDGPR                    | S73         | 0.34801358 | 1.14836438 | 0.6638961  |
| Q13098 | GPS1     | EGSQGELTPANSQSR                     | T479        | 0.01757713 | 0.6719338  | 0.36782257 |
| Q13098 | GPS1     | SPPREGSGELTPANSQSR                  | S468        | 0.17791606 | 1.43241355 | 0.55295852 |
| Q13098 | GPS1     | EGSQGELTPANSQSR                     | S474        | 0.50726667 | 1.128      | 0.75342646 |
| P81274 | GPSM2    | RHSMENMELMK                         | S408        | 0.78253844 | 0.93780783 | 0.90515203 |
| Q9Y3R0 | GRIP1    | RQSIPEEFK                           | S43         | 0.28870081 | 1.09134615 | 0.62154849 |
| Q8NEC7 | GSTCD    | VHTQETSEGLDSSSK                     | S233        | 0.28408524 | 1.77046007 | 0.61816331 |
| P35269 | GTF2F1   | GNSRPGTSPAEGGSTSSTLR                | T389        | 0.01478307 | 1.2079646  | 0.36631449 |
| P35269 | GTF2F1   | GNSRPGTSPAEGGSTSSTLR                | T389,S385   | 0.78327898 | 0.932282   | 0.90568387 |
| P35269 | GTF2F1   | GNSRPGTSPAEGGSTSSTLR                | S385        | 0.95959122 | 1.00916461 | 0.98250904 |
| P78347 | GTF2I    | SILSPGSGCGPIK                       | S210        | 0.90157816 | 0.96356188 | 0.95772102 |
| Q12789 | GTF3C1   | KNSSTDQGSDEEGLQK                    | T1064,S1068 | 0.08032529 | 1.17168863 | 0.48773691 |
| Q12789 | GTF3C1   | RASWASENGETDAEGTQMTPAK              | S1868       | 0.10164019 | 1.33385254 | 0.50213058 |
| Q12789 | GTF3C1   | RASWASENGETDAEGTQMTPAK              | S1865       | 0.28621901 | 1.36449847 | 0.61994998 |
| Q12789 | GTF3C1   | KNSSTDQGSDEEGLQK                    | S1062       | 0.52546211 | 1.20412634 | 0.76473579 |
| Q12789 | GTF3C1   | TSQPPVPQGEAEEDSQGK                  | S739        | 0.71179846 | 1.05432596 | 0.86848027 |
| Q12789 | GTF3C1   | AGVRPSSGSAWEACSEAPSK                | S845        | 0.79183943 | 1.08975938 | 0.90971296 |
| Q8WUA4 | GTF3C2   | LDLRPESQSPK                         | S167        | 0.63447782 | 1.07407407 | 0.82701539 |
| Q9Y5Q9 | GTF3C3   | GKLSAEENPDDSEVPSSGINSTK             | S43         | 0.02891933 | 1.30237581 | 0.40710444 |
| Q9UKN8 | GTF3C4   | EGDVEEPTDSDLPTGDAGGREPMEEK          | S652        | 0.07159995 | 1.58855186 | 0.46528233 |
| Q9UKN8 | GTF3C4   | ILLVDSPGMGNADDEQEEGTSSK             | S611        | 0.13106675 | 1.30341675 | 0.5125107  |
| Q9UKN8 | GTF3C4   | VGPADDGPAPSGEEEGEGGEGAGGK           | S19         | 0.16414963 | 1.28299871 | 0.54196083 |
| 075367 | H2AFY    | LEAIITPPPAK                         | T129        | 0.84826512 | 1.02034685 | 0.93278712 |
| P49590 | HARS2    | DLSPQHVVVR                          | S67         | 0.99323991 | 0.99925094 | 0.99524397 |
| 014929 | HAT1     | LISPYK                              | S361        | 0.839012   | 0.97349398 | 0.92948239 |
| Q7Z4H7 | HAUS6    | TPENLITEIR                          | T584        | 0.178165   | 0.74229915 | 0.55295852 |
| Q7Z4H7 | HAUS6    | AVLSDSPQLSEK                        | S552        | 0.29317276 | 0.80197084 | 0.62260296 |
| Q13547 | HDAC1    | IACEEFSDEEEGEGGR                    | S423        | 0.20233784 | 1.372455   | 0.57057857 |
| Q92769 | HDAC2    | MLPHAPGVQMQAIPEDAVHEDSGDEGEDPDK     | S394        | 0.22304594 | 0.34391883 | 0.58267075 |
| Q92769 | HDAC2    | IACDEEFSDEEDEGEGGR                  | S422        | 0.54204401 | 1.15924117 | 0.77202382 |
| P56524 | HDAC4    | QEPIESDEEEAEPPEVEPGQR               | S565        | 0.22850116 | 1.21519633 | 0.58267075 |
| P51858 | HDGF     | AGDLLEDSPK                          | S165        | 0.24529119 | 1.23974082 | 0.58971922 |
| P51858 | HDGF     | RAGDLLEDSPK                         | S165        | 0.42810422 | 1.18669778 | 0.7137923  |
| P51858 | HDGF     | SCVEEPEPEAAEGDGDK                   | S107        | 0.51529187 | 1.07003335 | 0.75905552 |
| Q7Z4V5 | HDGFRP2  | ADSDGAKPEPVAMAR                     | S240        | 0.20502049 | 1.10095883 | 0.57194083 |
| Q7Z4V5 | HDGFRP2  | EGPDLDRPGSDRQER                     | S652        | 0.32597246 | 1.23563778 | 0.64673257 |
| Q7Z4V5 | HDGFRP2  | ARGDSEALDEES                        | S664        | 0.56546745 | 0.92602041 | 0.78867185 |
| Q00341 | HDLBP    | VATLNSEESDPPTYK                     | S31         | 0.27338788 | 1.12246417 | 0.60684527 |
| Q9ULT8 | HECTD1   | VSTLAGPSSDDENEESKPEK                | S632        | 0.69002431 | 0.92195094 | 0.85682002 |
| Q9ULT8 | HECTD1   | VSTLAGPSSDDENEESKPEK                | S631        | 0.91377005 | 1.01118964 | 0.9646015  |
| Q42694 | HELZ     | RISSSSVQPCSEEVSTPQDLSLAQCK          | S1764       | 0.36999053 | 0.86776053 | 0.67368198 |
| Q96MH2 | HEXIM2   | TQSPGGCSAEAVLAR                     | S76         | 0.52264655 | 1.05183485 | 0.76304189 |
| Q8IV36 | HID1     | TGSEQGTSMEGSRPAAEPGTLK              | S593        | 0.00783326 | 1.99319166 | 0.31987481 |
| Q8IV36 | HID1     | SLEPEPQSLSDGSPAK                    | S653        | 0.60589312 | 1.06593574 | 0.81239035 |
| Q9BW71 | HIRIP3   | EESESEAEVPQR                        | S196        | 0.02338674 | 1.80221326 | 0.39017457 |
| Q9BW71 | HIRIP3   | ESEQESEEILAQK                       | S227        | 0.09729719 | 1.26978417 | 0.5018786  |
| Q9BW71 | HIRIP3   | EVSDEAGGGPQGER                      | S370        | 0.22882613 | 1.2403011  | 0.58267075 |
| Q9BW71 | HIRIP3   | SLKESEQESEEILAQK                    | S223,S227   | 0.29238434 | 0.58002199 | 0.62260296 |
| Q9BW71 | HIRIP3   | NGVAAEVSPAK                         | S125        | 0.55530165 | 1.06918745 | 0.78182069 |
| Q9BW71 | HIRIP3   | RPPTPCSDPER                         | T84,S87     | 0.76909716 | 0.94539007 | 0.89570666 |
| P16401 | HIST1H1B | SETAPAEATATPAPVEK                   | T11         | 0.49247134 | 0.58002103 | 0.74766286 |
| P16403 | HIST1H1C | KASGPPVSELITK                       | S36         | 0.33517917 | 1.40829322 | 0.65720257 |
| P16403 | HIST1H1C | ASGPPVSELITK                        | S36         | 0.37969867 | 1.2983243  | 0.67779179 |
| Q8NCD3 | HJURP    | GGPASPGLQGLETR                      | S473        | 0.90539673 | 0.97777028 | 0.95963537 |

|        |               |                                             |           |            |            |            |
|--------|---------------|---------------------------------------------|-----------|------------|------------|------------|
| P30443 | HLA-A         | KGGSYTAASSDSAQGSVDVSLTACK                   | Y344      | 0.12140413 | 1.5760347  | 0.51015063 |
| P30443 | HLA-A         | GGSYTAASSDSAQGSVDVSLTACK                    | S356      | 0.31178028 | 1.26313666 | 0.63653708 |
| P30443 | HLA-A         | GGSYTAASSDSAQGSVDVSLTACK                    | S349      | 0.55546488 | 0.8272551  | 0.78182069 |
| P30443 | HLA-A         | GGSYTAASSDSAQGSVDVSLTACK                    | S352      | 0.68443051 | 0.73135712 | 0.85273769 |
| P30443 | HLA-A         | GGSYTAASSDSAQGSVDVSLTACK                    | T345      | 0.80901777 | 1.05201032 | 0.91703842 |
| P30443 | HLA-A         | GGSYTAASSDSAQGSVDVSLTACK                    | S343      | 0.93221705 | 1.01849406 | 0.9704202  |
| Q9NP66 | HMG20A        | SPLTGYVR                                    | S105      | 0.90603259 | 0.99152542 | 0.95988871 |
| P17096 | HMGA1         | EEEEGISQESSEEEQ                             | S103      | 0.00705145 | 1.94308004 | 0.31708848 |
| P17096 | HMGA1         | EEEEGISQESSEEEQ                             | S99       | 0.15964342 | 2.49204469 | 0.54154538 |
| P17096 | HMGA1         | EPSEVPTPK                                   | T53       | 0.9600477  | 0.99175824 | 0.98250904 |
| P52926 | HMGA2         | KPAQEETEETSSQESAED                          | S105      | 0.02231968 | 1.75935225 | 0.38299619 |
| P52926 | HMGA2         | QQQEPTGEPSPK                                | S44       | 0.5766513  | 1.07543401 | 0.7967435  |
| Q9UGU5 | HMGXB4        | ASSVGLVSPQK                                 | S497      | 0.05236548 | 0.78773749 | 0.44612288 |
| Q92619 | HMHA1         | SSFNVSDVARPEAAGSPPEEGCTEGTPAK               | S578      | 0.39870809 | 0.83517828 | 0.69385814 |
| Q9UK76 | HN1           | NSSEASSGDFLDLK                              | S87       | 0.31140171 | 0.95412065 | 0.63653708 |
| Q9UK76 | HN1           | RNSSEASSGDFLDLK                             | S87       | 0.42783265 | 0.9207847  | 0.7137923  |
| Q9UK76 | HN1           | RNSSEASSGDFLDLK                             | S88       | 0.44607187 | 0.92361721 | 0.72351031 |
| Q9UK76 | HN1           | MASNIFGTPEENQASWAK                          | T54       | 0.84659373 | 0.92901389 | 0.93243816 |
| Q9UK76 | HN1           | SSGGREDLESSGLQR                             | S71       | 0.95920394 | 1.00784929 | 0.98250904 |
| Q9H910 | HN1L          | TSDFGSPVTATSR                               | S97       | 0.69496409 | 0.92936565 | 0.85898626 |
| Q14541 | HN4G          | QISVSPGSSDINVK                              | S121      | 0.81509323 | 1.12315493 | 0.91990355 |
| Q13151 | HNRNPA0       | EDIYSGGGGGGSR                               | S188      | 0.23724847 | 1.19709959 | 0.58536202 |
| P09651 | HNRNPA1       | SESPKEPEQLR                                 | S6        | 0.02069155 | 1.10292249 | 0.37949754 |
| P09651 | HNRNPA1       | NQGGYGGSSSSSYGSGR                           | S362      | 0.03881821 | 0.72142884 | 0.43108921 |
| P09651 | HNRNPA1       | NQGGYGGSSSSSYGSGR                           | S368      | 0.84087277 | 1.06232558 | 0.93058509 |
| P22626 | HNRNPA2B1     | GFGDGYNGYGGPGGGNFGGSPYVGGGR                 | S259      | 0.18515014 | 0.55064854 | 0.55994868 |
| P22626 | HNRNPA2B1     | GGNFGFGDSR                                  | S212      | 0.34349468 | 1.20770289 | 0.66290366 |
| P51991 | HNRNPA3       | SSGSPYGGYGGGSGGYGSR                         | S358      | 0.64461806 | 0.82909615 | 0.83115022 |
| P07910 | HNRNPC        | EAEEGEDDRDSANGEDDS                          | S299      | 0.22718633 | 0.5        | 0.58267075 |
| P07910 | HNRNPC        | MESEGGADDSAEEDLLDDDDNEDR                    | S260      | 0.2653079  | 0.69942197 | 0.60298408 |
| Q14103 | HNRNPD        | IFVGGLSPDTPEEK                              | S190      | 0.01883139 | 1.34146661 | 0.37230658 |
| O14979 | HNRNPD        | VFVGGLSPDTSEEQIK                            | S241      | 0.06814207 | 1.36518771 | 0.4637455  |
| P31943 | HNRNPH1       | HTGPNSPDTANDGFVR                            | S104      | 0.11581711 | 1.19463944 | 0.51002233 |
| P31943 | HNRNPH1       | HTGPNSPDTANDGFVR                            | T100      | 0.4342523  | 1.09960588 | 0.71865424 |
| P31943 | HNRNPH1       | HTGPNSPDTANDGFVR                            | T107      | 0.98040171 | 1.0026824  | 0.99052277 |
| P61978 | HNRNPK        | DYDDMSPR                                    | S284      | 0.1425763  | 1.19086935 | 0.5281867  |
| P61978 | HNRNPK        | RDYDDMSPR                                   | S284      | 0.53076377 | 1.06425703 | 0.76679083 |
| Q8WVV9 | HNRNPL        | TEEGEIDYSAEENRR                             | S35       | 0.49566486 | 0.7997365  | 0.74968842 |
| P52272 | HNRNPM        | MGLSMER                                     | S528      | 0.83594163 | 0.95343859 | 0.92778088 |
| P52272 | HNRNPM        | MGANSLER                                    | S575      | 0.9182694  | 1.01961759 | 0.96556856 |
| Q00839 | HNRNPU        | LQALDDEEAGGRPAMEPGNGSLDLGGDSAGR             | S59       | 0.24245952 | 0.31230612 | 0.58886046 |
| Q1KMD3 | HNRNPUL2      | EEDEPEERSGDETPGSEVPGDK                      | S161      | 0.03041921 | 1.53009898 | 0.40879194 |
| Q1KMD3 | HNRNPUL2      | SGDETPGSEVPGDK                              | S161      | 0.72593377 | 0.95412552 | 0.87523758 |
| P35367 | HRH1          | SGSNTGLDYIK                                 | S380      | 0.22195125 | 0.87092564 | 0.58267075 |
| Q53T59 | HS1BP3        | KLSPQDPSDEVSSVDPLK                          | S249      | 0.45800554 | 0.89954568 | 0.72748678 |
| Q00613 | HSF1          | GHTDTEGRPPSPPTSTPEK                         | S363      | 0.00148318 | 1.73739742 | 0.24972095 |
| Q00613 | HSF1          | GHTDTEGRPPSPPTSTPEK                         | T369,S363 | 0.08966209 | 0.65937007 | 0.4960359  |
| Q00613 | HSF1          | EPPSPPPQSPR                                 | S303,S307 | 0.34562685 | 1.12049175 | 0.66293814 |
| P07900 | HSP90AA1      | ESEDKPEIEDVGSDEEEEEK                        | S252      | 0.19245839 | 1.41568722 | 0.5651429  |
| P07900 | HSP90AA1      | ESEDKPEIEDVGSDEEEEEK                        | S263      | 0.4745991  | 0.90103567 | 0.73608495 |
| P07900 | HSP90AA1      | ESEDKPEIEDVGSDEEEEEK                        | S263      | 0.69393332 | 1.18148272 | 0.85860808 |
| Q14568 | HSP90AA2      | DKPEIEDVGSDEEEEEK                           | S263      | 0.31580001 | 1.28750747 | 0.63800725 |
| Q14568 | HSP90AA2      | DKPEIEDVGSDEEEEEK                           | S263      | 0.40415961 | 0.74214307 | 0.6993632  |
| P08238 | HSP90AB1      | IEDVGSDEEDDSGK                              | S255      | 0.08800307 | 1.20119403 | 0.4960359  |
| P08238 | HSP90AB1      | EISDDEAEEEEK                                | S226      | 0.09913781 | 1.19173002 | 0.5018786  |
| P08238 | HSP90AB1      | IEDVGSDEEDDSGKDK                            | S255      | 0.42244042 | 1.11939806 | 0.71201295 |
| P14625 | HSP90B1       | EESDDEAAVEEEEEEK                            | S306      | 0.00840805 | 3.06616729 | 0.3318662  |
| P14625 | HSP90B1       | EKEESDDEAAVEEEEEEK                          | S306      | 0.03535379 | 6.46164817 | 0.42085354 |
| P08107 | HSPA1A;HSPA1B | GGSGSGPTIEVD                                | S633      | 0.46278494 | 1.16713352 | 0.72897667 |
| P34932 | HSPA4         | NAEQNGPVDGQGDNPGPQAAEQGTDAVPSDSDK           | S830      | 0.05767191 | 1.23365006 | 0.45298462 |
| P04792 | HSPB1         | GPSWDPFRR                                   | S15       | 0.13544511 | 0.74877879 | 0.52141517 |
| P04792 | HSPB1         | QLSSGVSEIR                                  | S82       | 0.50341676 | 0.79273085 | 0.75255906 |
| Q9NZL4 | HSPBP1        | LLQTCFSSPADDSMDR                            | S354      | 0.71302679 | 1.10951217 | 0.86856453 |
| P10809 | HSPD1         | TVIIEQSWGSPK                                | S70       | 0.27119172 | 1.12529366 | 0.60553604 |
| Q92598 | HSPH1         | NVQQDNSEAGTQPQVQTDAAQTSQSPSPPELTSEENK       | S562      | 0.05622088 | 1.29666959 | 0.45298462 |
| Q92598 | HSPH1         | NVQQDNSEAGTQPQVQTDAAQTSQSPSPPELTSEENKIPDADK | S557      | 0.13064213 | 2.78917883 | 0.5125107  |
| Q92598 | HSPH1         | NVQQDNSEAGTQPQVQTDAAQTSQSPSPPELTSEENK       | S557      | 0.43008088 | 1.17948718 | 0.71554457 |
| O43719 | HTATSF1       | ESEDDLKESSEEEVGPTK                          | S529      | 0.00117716 | 1.55558253 | 0.22363976 |
| O43719 | HTATSF1       | NDCEENGLAKESDDLK                            | S521      | 0.09178802 | 1.20225989 | 0.49933922 |
| O43719 | HTATSF1       | LFEDDSDNEK                                  | S702      | 0.13026087 | 1.14193308 | 0.5125107  |
| O43719 | HTATSF1       | VFDDDESDEK                                  | S642      | 0.32225722 | 0.84883167 | 0.64145984 |
| O43719 | HTATSF1       | LFEEESDDKEDEDADGK                           | S676      | 0.52475102 | 1.06791569 | 0.76426492 |
| O43719 | HTATSF1       | LFDDSDER                                    | S721      | 0.626022   | 0.9488959  | 0.82174981 |
| P42858 | HTT           | EPGEQASVPLSPK                               | S1199     | 0.20548029 | 0.88       | 0.57194083 |
| Q7Z627 | HUWE1         | EESPMVDVQPPSPAQDTQSIASDGTQPQGEK             | S3816     | 0.02551115 | 1.40521695 | 0.4040435  |
| Q7Z627 | HUWE1         | GGGTASDDEFENLR                              | S1907     | 0.02715305 | 1.13159455 | 0.40703825 |
| Q7Z627 | HUWE1         | GNDTPLALESTNTEK                             | T1722     | 0.03527891 | 0.59266551 | 0.42085354 |
| Q7Z627 | HUWE1         | REESPMVDVQPPSPAQDTQSIASDGTQPQGEK            | S3816     | 0.11744714 | 1.2245935  | 0.51002233 |
| Q7Z627 | HUWE1         | DLMSSEEDQMMR                                | S1368     | 0.12962516 | 0.90517858 | 0.5125107  |
| Q7Z627 | HUWE1         | AGSSTPGDAPPAVAEVQGR                         | T2889     | 0.15331171 | 1.16084977 | 0.53741649 |
| Q7Z627 | HUWE1         | REESPMVDVQPPSPAQDTQSIASDGTQPQGEK            | S3824     | 0.15579175 | 1.15275334 | 0.53741649 |

|        |         |                                |             |            |            |            |
|--------|---------|--------------------------------|-------------|------------|------------|------------|
| Q7Z6Z7 | HUWE1   | AQCETLSPDGLPEEQPQTTK           | S3662       | 0.26818705 | 0.84130501 | 0.60403212 |
| Q7Z6Z7 | HUWE1   | REESPMVDVQSPSAQDTQSIASDGTPOQEK | T3822,S3818 | 0.4161711  | 0.85430501 | 0.70812712 |
| Q9P2D0 | IBTK    | DLQSPDFTTGFHSDK                | S1045       | 0.09535279 | 1.60082337 | 0.5018786  |
| Q5TF58 | IFFO2   | VASDDDISEQDGEVNR               | S333        | 0.16418663 | 0.81054204 | 0.54196083 |
| Q16666 | IF16    | EVDATSPAPSTSTVK                | S106        | 0.11427079 | 1.20882607 | 0.51002233 |
| Q16666 | IF16    | VSEEQTPPSPAGAGMSTAMGR          | S153        | 0.22857216 | 1.42700601 | 0.58267075 |
| P08069 | IGF1R   | ALPLPQSSTC                     | T1366       | 0.14149633 | 1.55881081 | 0.52770768 |
| Q9Y6M1 | IGF2BP2 | ISYIPDEEVSSPSPQR               | S164        | 0.02559359 | 1.3910387  | 0.4040435  |
| Q9Y6M1 | IGF2BP2 | ISYIPDEEVSSPSPQR               | S162        | 0.39791787 | 1.10520164 | 0.69313339 |
| Q9NPH3 | IL1RAP  | RSSSDEQGLSYSSLK                | S556        | 0.11003205 | 1.26260503 | 0.51002233 |
| Q9NPH3 | IL1RAP  | SSSDEQGLSYSSLK                 | S555        | 0.78150894 | 0.93873469 | 0.90493462 |
| Q12906 | ILF3    | GSSEQAESDNMDVPPEDDSK           | S62         | 0.43440043 | 0.84339556 | 0.71865424 |
| Q12906 | ILF3    | VLQDMGLPTGAEGRDSSK             | S476        | 0.91800778 | 1.02662896 | 0.96556856 |
| Q12906 | ILF3    | VLQDMGLPTGAEGRDSSK             | S477        | 0.92843957 | 1.01932713 | 0.96804979 |
| P12268 | IMPDH2  | GMGSLDAMDK                     | S416        | 0.57058212 | 1.09749304 | 0.79135766 |
| Q8NI35 | INADL   | RLFDEASVDEPR                   | S645        | 0.06492627 | 0.81080352 | 0.46140392 |
| Q8NI35 | INADL   | LFDEASVDEPR                    | S645        | 0.14760231 | 0.84768898 | 0.53170891 |
| Q8NI35 | INADL   | VPDSPENELK                     | S522        | 0.38300871 | 1.10106383 | 0.67941113 |
| Q9NQ57 | INCENP  | IAQVSPGPR                      | S263        | 0.50610473 | 0.85851174 | 0.75314323 |
| Q27J81 | INF2    | GARPPAAGPGGDEDEEDTAPESALDTSLDK | S1188       | 0.21092509 | 1.24567474 | 0.57664775 |
| Q27J81 | INF2    | GARPPAAGPGGDEDEEDTAPESALDTSLDK | T1179       | 0.84154989 | 1.0495599  | 0.93101506 |
| Q8WYH8 | ING5    | MEGSDFESSGGR                   | S118        | 0.77605623 | 0.9599636  | 0.9005906  |
| Q9C086 | INO80B  | AWLDEDSNLSPLR                  | S132        | 0.7113949  | 1.08270302 | 0.86831628 |
| Q96PE3 | INPP4A  | ASPTSTEEQVMLR                  | S487        | 0.75943888 | 1.0566975  | 0.88966056 |
| Q8N201 | INTS1   | SSPEQPIGQGR                    | S1327       | 0.08961902 | 1.17570499 | 0.4960359  |
| Q8N201 | INTS1   | LSPEQEQQLMPR                   | S307        | 0.88662401 | 1.01150252 | 0.94861919 |
| Q9NVR2 | INTS10  | STQIENQHQAQDTSDLMSPSK          | S231        | 0.44811131 | 1.11374408 | 0.72373014 |
| Q96CB8 | INTS12  | LEKPETQSSPITVQSSK              | S128        | 0.15188552 | 1.36366128 | 0.53741649 |
| Q68E01 | INTS3   | DESCYDNAEAAFSDDDEEDLNSK        | S537        | 0.28439305 | 0.44660533 | 0.61822909 |
| Q6DN90 | IQSEC1  | MQFSFEGPEK                     | S180        | 0.26471939 | 0.94276917 | 0.60298408 |
| Q6DN90 | IQSEC1  | NSWDSPAFSNDVIR                 | S512        | 0.5672639  | 0.91059264 | 0.78987432 |
| Q8IU81 | IRF2BP1 | AGGASPAASSTAQPPTQHR            | S453        | 0.41054653 | 1.14199107 | 0.70298466 |
| Q7Z5L9 | IRF2BP2 | RPASVSSAAVEHEQR                | S240        | 0.05521331 | 0.564906   | 0.45081948 |
| Q7Z5L9 | IRF2BP2 | KPSPEPEGEVGGPK                 | S360        | 0.55081739 | 0.90824645 | 0.77970026 |
| Q7Z5L9 | IRF2BP2 | NSNSPPSPSSMNQR                 | S460        | 0.72742694 | 1.03256936 | 0.87523758 |
| Q7Z5L9 | IRF2BP2 | RKPSPEPEGEVGGPK                | S360        | 0.78632956 | 1.0321463  | 0.9069357  |
| Q7Z5L9 | IRF2BP2 | LEEPPELNRQSPNPR                | S175        | 0.83871484 | 1.03030303 | 0.92947238 |
| Q9H1B7 | IRF2BPL | NSSSPVSPASVPGQR                | S659        | 0.02631073 | 1.44926041 | 0.40703825 |
| Q9H1B7 | IRF2BPL | RNSSSPVSPASVPGQR               | S657,S662   | 0.13061699 | 0.78852819 | 0.5125107  |
| Q9H1B7 | IRF2BPL | KASPEPPDSAEGALK                | S547        | 0.22586678 | 1.12871888 | 0.58267075 |
| Q9H1B7 | IRF2BPL | ASPEPPDSAEGALK                 | S547        | 0.39682191 | 1.10114759 | 0.69247075 |
| Q9H1B7 | IRF2BPL | RNSSSPVSPASVPGQR               | S657,S659   | 0.82656947 | 0.96306376 | 0.92458845 |
| O14896 | IRF6    | HSPQEEENTIFK                   | S47         | 0.03473183 | 0.6512018  | 0.41964372 |
| O14896 | IRF6    | LQISTPDIK                      | S424        | 0.50151023 | 0.94093686 | 0.75168596 |
| P35568 | IRS1    | KGSGDYMPMSPK                   | S629,S636   | 0.00985865 | 0.43770683 | 0.34197858 |
| P35568 | IRS1    | ASSDGEGTMSRPASVDGSPVSPSTNR     | T351,S329   | 0.08619375 | 1.40312876 | 0.49557355 |
| P35568 | IRS1    | KGSGDYMPMSPK                   | S629        | 0.12848848 | 1.34219786 | 0.5125107  |
| P35568 | IRS1    | VNLSPNR                        | S1078       | 0.1435895  | 0.7886167  | 0.5281867  |
| P35568 | IRS1    | HSSETFSSTPSATR                 | T1103       | 0.18239944 | 0.87456125 | 0.55721647 |
| P35568 | IRS1    | RHSSETFSSTPSATR                | S1100       | 0.28919538 | 1.17996604 | 0.62154849 |
| Q9Y4H2 | IRS2    | ASSPAESSPEDSGYMR               | S731        | 0.00719141 | 2.16951024 | 0.31708848 |
| Q9Y4H2 | IRS2    | SSEGGVGVGGGDEPPTSPR            | S1203       | 0.00754835 | 1.47385588 | 0.31708848 |
| Q9Y4H2 | IRS2    | TYSLTTPAR                      | S577        | 0.05873033 | 0.65769281 | 0.45298462 |
| Q9Y4H2 | IRS2    | HNSASVENVSLR                   | S1176       | 0.07995652 | 1.35185185 | 0.48759875 |
| Q9Y4H2 | IRS2    | HNSASVENVSLR                   | S1174       | 0.17887935 | 0.87526653 | 0.55295852 |
| P16144 | ITGB4   | VLSTSTLTR                      | S1483       | 0.02090501 | 0.51620639 | 0.37949754 |
| P16144 | ITGB4   | LTAGVPDTPTR                    | T1530       | 0.21789795 | 1.19186653 | 0.58142167 |
| P16144 | ITGB4   | DYSTLTSVSHDSR                  | S1518       | 0.40780349 | 1.11657754 | 0.70014585 |
| Q15811 | ITSN1   | STSMDSGSSSPASLK                | S978        | 0.27875877 | 1.21437196 | 0.61249442 |
| Q965T2 | IWS1    | HQASDSENEPPKPR                 | S196        | 0.07530043 | 2.20150083 | 0.47168775 |
| Q965T2 | IWS1    | GPASDSETEDASR                  | S313        | 0.11673332 | 1.28444451 | 0.51002233 |
| Q965T2 | IWS1    | HQASDSENEPPKPR                 | S196,S198   | 0.117947   | 0.71102184 | 0.51002233 |
| Q965T2 | IWS1    | HPASDSEIEELQK                  | S157        | 0.44829125 | 1.0629742  | 0.72373014 |
| P78504 | JAG1    | THNSEVEEDMDK                   | S1154       | 0.46508375 | 0.86408859 | 0.73010228 |
| Q15652 | JMJD1C  | TSPLVQNNNEQGSLR                | T2052       | 0.35735251 | 1.10387801 | 0.66868863 |
| Q6NYC1 | JMJD6   | TCSMVGNGDTSQDDCVSK             | S381        | 0.81143922 | 1.04718493 | 0.91877983 |
| Q8N9B5 | JMY     | GAASPVLQEDHCDLSPVLQVEEK        | S713        | 0.21924877 | 0.22676481 | 0.58267075 |
| O75564 | JRK     | EAEGGRPPAATSPAEEVWSSEK         | S409        | 0.98540974 | 0.99718466 | 0.99242732 |
| P05412 | JUN     | NSDLLTSPDVGLLK                 | T62         | 0.70015537 | 0.92059337 | 0.86274503 |
| P17275 | JUNB    | SRDATPPVSPINMEDQER             | S251        | 0.12465661 | 1.28914391 | 0.5125107  |
| P17275 | JUNB    | DATPPVSPINMEDQER               | T255,S259   | 0.14211384 | 0.85210662 | 0.52817885 |
| P17275 | JUNB    | SRDATPPVSPINMEDQER             | T255,S259   | 0.52017538 | 0.9005291  | 0.76172754 |
| O60229 | KALRN   | SFDLGSPPKPGDETTQGDSDADEK       | S1799       | 0.04428455 | 1.82550647 | 0.44293212 |
| O60229 | KALRN   | WLTSPPVR                       | S1773       | 0.48661137 | 0.95819195 | 0.74328043 |
| Q14678 | KANK1   | SYSAGNASQLEQLSR                | S325        | 0.60661357 | 0.91510312 | 0.81240705 |
| Q7Z3B3 | KANSL1  | TFPLAHSQAECEDQLDAQER           | T1039       | 0.24396268 | 0.73332514 | 0.58932994 |
| Q7Z3B3 | KANSL1  | LSPGTDSSSNLGGVK                | S249        | 0.43545736 | 1.08969107 | 0.71892806 |
| Q92993 | KAT5    | NGLPGSRPGSPER                  | S90         | 0.4486577  | 1.21368733 | 0.72373014 |
| Q92794 | KAT6A   | KSSTSDWPTDNQDGDWDGK            | S447        | 0.19384977 | 1.53245377 | 0.56542437 |
| Q92794 | KAT6A   | RLSEGVEPWR                     | S941        | 0.75734674 | 0.9577573  | 0.88966056 |
| Q92794 | KAT6A   | SSTSDWPTDNQDGDWDGK             | S447        | 0.82417929 | 0.97545785 | 0.92458845 |

|        |           |                                            |           |            |            |            |
|--------|-----------|--------------------------------------------|-----------|------------|------------|------------|
| O95251 | KAT7      | SSGSETEQVVFSDR                             | S102      | 0.00820205 | 1.56318888 | 0.33074779 |
| O95251 | KAT7      | RNAGSSSDGTEDSDFSTDLEHTDSSSEDGTSR           | S10       | 0.96423547 | 0.98843829 | 0.98250904 |
| O60341 | KDM1A     | LP PPPQAPPEEENESEPEEPSGVGEEAFAQSR          | S166      | 0.92661479 | 1.02508692 | 0.96756561 |
| Q9Y2K7 | KDM2A     | YEDDGISDDEIEGK                             | S28       | 0.10143957 | 0.74458558 | 0.50190803 |
| Q9Y2K7 | KDM2A     | MEESDEAVQAK                                | S692      | 0.12658286 | 1.28689514 | 0.5125107  |
| Q9Y2K7 | KDM2A     | RYEDDGISDDEIEGK                            | S28       | 0.2238143  | 0.79793363 | 0.58267075 |
| Q8NHM5 | KDM2B     | APKPPTDGTSTPTSPSEDQEALGK                   | T444      | 0.29649474 | 1.21473354 | 0.62494294 |
| P29375 | KDM5A     | VEPEVLSTDTQTSPEPGTR                        | S204      | 0.77551121 | 1.0385142  | 0.90057565 |
| P41229 | KDM5C     | VQGLLENGDSVTSPEK                           | S1359     | 0.06746731 | 0.79154079 | 0.4637455  |
| Q07666 | KHDRB51   | SGSMDPSGAHPSVR                             | S18       | 0.15511748 | 0.83381924 | 0.53741649 |
| Q07666 | KHDRB51   | SGSMDPSGAHPSVR                             | S20       | 0.2028144  | 0.81605976 | 0.57092431 |
| Q92945 | KHSRP     | VQJSPDSGGLPER                              | S181      | 0.19199307 | 1.17326916 | 0.5651429  |
| Q92628 | KIAA0232  | NFETTQVCNESPHGDGYSSGVK                     | S814      | 0.45919585 | 1.19477265 | 0.72770675 |
| Q6ICG6 | KIAA0930  | VSTGDTSPCGTEEDSSPASPMPHER                  | S267      | 0.00604922 | 1.4347253  | 0.31475473 |
| Q6ICG6 | KIAA0930  | VSTGDTSPCGTEEDSSPASPMPHER                  | S279,S262 | 0.48436504 | 1.10570617 | 0.74167539 |
| Q9Y2F5 | KIAA0947  | SELCSPLGK                                  | S532      | 0.03163952 | 0.765265   | 0.40879194 |
| Q9Y2F5 | KIAA0947  | SELCSPLGK                                  | S533      | 0.11335763 | 0.73901058 | 0.51002233 |
| Q9Y2F5 | KIAA0947  | LDTGSPPEPTR                                | S1854     | 0.41751659 | 1.14957694 | 0.70852632 |
| Q9Y2F5 | KIAA0947  | SISPEVSASR                                 | S925      | 0.49023677 | 0.95343242 | 0.74595805 |
| Q9Y2F5 | KIAA0947  | ETTGSSSHASEPTPQAAAALDTGESSPISGMPQENPQRPEAR | S1330     | 0.72873283 | 0.89246653 | 0.87589125 |
| Q2LD37 | KIAA1109  | VVFENEQDNSSLTK                             | T2757     | 0.53765245 | 0.95955021 | 0.77155648 |
| Q96AT1 | KIAA1143  | IQPQPDEDGDHSDK                             | S50       | 0.11921081 | 0.67302805 | 0.51002233 |
| Q96AT1 | KIAA1143  | NSSLLSFDNEDENE                             | S146      | 0.52745526 | 1.11036452 | 0.76612818 |
| Q96A73 | KIAA1191  | QPASAQSTPSTPHSSPK                          | S182      | 0.01898791 | 0.45446714 | 0.37230658 |
| Q96A73 | KIAA1191  | QPASAQSTPSTPHSSPK                          | T178      | 0.04719899 | 0.48136654 | 0.44612288 |
| Q5T5P2 | KIAA1217  | RQEQPSIESTSPISR                            | S1650     | 0.20644446 | 1.25577741 | 0.57287379 |
| Q5T5P2 | KIAA1217  | RQEQPSIESTSPISR                            | T1649     | 0.96303449 | 1.01300141 | 0.98250904 |
| Q69YN4 | KIAA1429  | EDYFEPISDR                                 | S222      | 0.25532249 | 0.92328783 | 0.59772886 |
| Q69YN4 | KIAA1429  | SFLSEPPSGR                                 | S1579     | 0.58519901 | 1.03743778 | 0.80108627 |
| Q9P206 | KIAA1522  | CSLHSPASASR                                | S325      | 0.18066283 | 0.90721358 | 0.55295852 |
| Q9P206 | KIAA1522  | GLAGPPASPGK                                | S545      | 0.23557869 | 0.87952522 | 0.58536202 |
| Q9P206 | KIAA1522  | FSSVSPQPR                                  | S342      | 0.42105384 | 0.89344262 | 0.71004687 |
| Q9P206 | KIAA1522  | LQLERPVSPTQADLQR                           | S929      | 0.53428113 | 0.91077441 | 0.76972936 |
| Q9P206 | KIAA1522  | DQSPPPSPPPSYHPPPPPTK                       | S669,S673 | 0.66788914 | 0.91689972 | 0.84569578 |
| Q9P206 | KIAA1522  | GSPSGGSTAEASDLSIR                          | S404      | 0.67678168 | 0.9278046  | 0.85019381 |
| Q9HCM1 | KIAA1551  | HSSLGQSLSPEK                               | S1358     | 0.95013518 | 0.99330544 | 0.97916383 |
| Q9BY89 | KIAA1671  | STSVDHSTDLLESTDMEGPPPPDACPEK               | S1602     | 0.06163968 | 1.31701165 | 0.45713107 |
| Q9BY89 | KIAA1671  | LSLSSQTEPTSAGDYDCSR                        | S1574     | 0.20711342 | 0.82107647 | 0.57287379 |
| Q9BY89 | KIAA1671  | GRPSLTGENLEAK                              | S1441     | 0.31368467 | 0.6966857  | 0.63653708 |
| Q9BY89 | KIAA1671  | GGSSVEAPCPSDVTPEDDR                        | T600      | 0.52733272 | 1.09653725 | 0.76612818 |
| Q9BY89 | KIAA1671  | SWLSLK                                     | S767      | 0.82653975 | 1.1037726  | 0.92458845 |
| Q9BY89 | KIAA1671  | RSPTVEPSTLPR                               | S1224     | 0.9014985  | 1.02536205 | 0.95772102 |
| Q9ULH0 | KIDINS220 | QMSFDLTK                                   | S918      | 0.4511742  | 1.12889046 | 0.72422173 |
| Q9ULH0 | KIDINS220 | LPSDEDESGETEESDNTPLLK                      | S1521     | 0.46132042 | 1.10031346 | 0.72844819 |
| P52732 | KIF11     | LDIPTGTTTQR                                | T926      | 0.31097716 | 0.78527612 | 0.63653708 |
| Q9NS87 | KIF15     | QLEHVMDSAAEDPQSPK                          | S1141     | 0.38227617 | 0.76941112 | 0.67941113 |
| Q86Y91 | KIF18B    | LQVYEGGGQPPQDLPGSPK                        | S413      | 0.22137898 | 0.61761576 | 0.58267075 |
| Q86Y91 | KIF18B    | RGLSLPDTQPSQGPSTPK                         | S674      | 0.37794618 | 0.82025009 | 0.67666227 |
| O60333 | KIF1B     | MSDTGSPGMQR                                | S1454     | 0.20092392 | 1.18426748 | 0.56975265 |
| O60333 | KIF1B     | SGLSLEELR                                  | S1057     | 0.50457465 | 1.07594797 | 0.75314323 |
| O95235 | KIF20A    | EHSLQVSPLEK                                | S532      | 0.51459335 | 0.83883623 | 0.75871945 |
| Q7Z456 | KIF21A    | KLSSSDAPAQDTGSSAAAVETDASR                  | S853      | 0.09596096 | 0.74779387 | 0.5018786  |
| Q7Z456 | KIF21A    | KLSSSDAPAQDTGSSAAAVETDASR                  | S854      | 0.53307109 | 1.0706476  | 0.76840363 |
| Q7Z456 | KIF21A    | KIPEPSPVTR                                 | T1242     | 0.91802413 | 0.99106552 | 0.96556856 |
| Q02241 | KIF23     | RSSTVAPAQPDGAESEWTDVETR                    | S911      | 0.01401421 | 0.72563065 | 0.36631449 |
| Q02241 | KIF23     | SSTVAPAQPDGAESEWTDVETR                     | T913      | 0.04302766 | 0.75210104 | 0.44128756 |
| Q02241 | KIF23     | YMLTHQELASDGEIETK                          | S867      | 0.87446928 | 0.97807866 | 0.94412246 |
| Q99661 | KIF2C     | GSSANPVNSVR                                | S187      | 0.94879389 | 1.01412429 | 0.9788835  |
| O95239 | KIF4A     | TFSLTEVR                                   | S801      | 0.16614385 | 0.79795598 | 0.54308896 |
| O95239 | KIF4A     | ALASNTSFFSGCSPIEEEAH                       | S1225     | 0.41489924 | 0.79080802 | 0.70812712 |
| O95239 | KIF4A     | NQSLVEENEK                                 | S394      | 0.57995562 | 1.10734315 | 0.79886286 |
| O95239 | KIF4A     | RTFSLTEVR                                  | S801      | 0.78743488 | 0.94199328 | 0.90720825 |
| Q07866 | KLC1      | VDSPTVTTTLK                                | S460      | 0.18779461 | 0.80885502 | 0.56058734 |
| Q9H0B6 | KLC2      | TLSSSSMDLSR                                | S611      | 0.03649666 | 0.51163268 | 0.42504778 |
| Q9H0B6 | KLC2      | LDEDASPNEEK                                | S151      | 0.72709152 | 1.0574     | 0.87523758 |
| Q9H0B6 | KLC2      | SVEEPTQPGGTGLSDSR                          | S589      | 0.88696394 | 0.97530588 | 0.94861919 |
| Q6P597 | KLC3      | TLASSTQDLSPH                               | S502      | 0.82296318 | 0.95885225 | 0.92458845 |
| Q9NSK0 | KLC4      | RSSELLVR                                   | S566      | 0.37872468 | 1.29487397 | 0.67666227 |
| P57682 | KLF3      | RPLPVPSPDTQR                               | S250      | 0.03036012 | 1.19468139 | 0.40879194 |
| Q8TBB5 | KLHDC4    | SEDESLLEEAGSPAPGPCPR                       | S413      | 0.35458368 | 0.85178772 | 0.66702539 |
| Q8TBB5 | KLHDC4    | QVLITAPGSAGQPRSEDESLLEEAGSPAPGPCPR         | S413      | 0.68474336 | 1.108448   | 0.85273769 |
| Q03164 | KMT2A     | AQQQESDSSSETS                              | S1059     | 0.23193052 | 1.37046839 | 0.58402949 |
| Q03164 | KMT2A     | SREDSPELNPPGIEDNR                          | S1858     | 0.66462113 | 1.0625     | 0.84417266 |
| Q03164 | KMT2A     | SSPEGDPVPLTEVSK                            | S1685     | 0.7104312  | 1.06113369 | 0.86779668 |
| Q03164 | KMT2A     | TIAHSPTSFTESSEK                            | S2098     | 0.870923   | 1.00723712 | 0.94366974 |
| Q9UMN6 | KMT2B     | RERPSPESPVQGP                              | S861      | 0.49249336 | 1.1511194  | 0.74766286 |
| Q9UMN6 | KMT2B     | GVLLDRPGEAGEESPGLQER                       | S2348     | 0.57033216 | 0.88561138 | 0.7913512  |
| Q8NEZ4 | KMT2C     | EQSAEEDAEEVNSK                             | S89       | 0.13793974 | 1.17488451 | 0.52409548 |
| O14686 | KMT2D     | LEGPVSPDVEPGKEETESK                        | S1671     | 0.1120589  | 1.52303523 | 0.51002233 |
| O14686 | KMT2D     | QTAGQGGSPCEEQEP                            | S1180     | 0.22040597 | 1.18895672 | 0.58267075 |
| O14686 | KMT2D     | ASEPLSSPPFGESR                             | S2274     | 0.36878713 | 1.16955209 | 0.67368198 |

|        |         |                                          |           |            |            |            |
|--------|---------|------------------------------------------|-----------|------------|------------|------------|
| O14686 | KMT2D   | SPDTGPDWLK                               | S4849     | 0.58607387 | 1.09752594 | 0.80118298 |
| P52292 | KPNA2   | NVSSFPDDATSPQLQENR                       | S62       | 0.97405299 | 0.99275933 | 0.9878516  |
| O00505 | KPNA3   | NVPQEESLESDVDADFK                        | S60       | 0.25749344 | 0.80634921 | 0.59892773 |
| O00629 | KPNA4   | NVPHEDICEDSDIDGDR                        | S60       | 0.07766768 | 0.5384916  | 0.48183834 |
| Q8N9T8 | KRI1    | QLPALDGLSMGPESPPAQEEEEAPVSPHK            | S628,S639 | 0.15714129 | 0.71501673 | 0.53741649 |
| Q8N9T8 | KRI1    | YVDEENSGETSNHR                           | S136      | 0.34415422 | 1.09775429 | 0.66293814 |
| Q8N9T8 | KRI1    | AFVDESEDEDGAGEGGSSLLQK                   | S171      | 0.35731316 | 1.14644068 | 0.66868863 |
| P08727 | KRT19   | QSSATSSFGGLGGGSVR                        | S22       | 0.43992577 | 1.15080034 | 0.72004085 |
| P08727 | KRT19   | QSSATSSFGGLGGGSVR                        | S14       | 0.47794253 | 1.2780925  | 0.73878419 |
| P08727 | KRT19   | QSSATSSFGGLGGGSVR                        | S10       | 0.49672752 | 1.72639321 | 0.74981346 |
| P19013 | KRT4    | GFSCGSAIVGGGK                            | S19       | 0.15016594 | 0.44670945 | 0.53597354 |
| P02538 | KRT6A   | SLYGLGGSK                                | S60       | 0.14613716 | 0.77838097 | 0.53170891 |
| P08729 | KRT7    | SAYGGPVGAGIR                             | S53       | 0.00756845 | 0.18018235 | 0.31708848 |
| P08729 | KRT7    | FASFIDK                                  | S104      | 0.09757793 | 1.50678459 | 0.5018786  |
| P05787 | KRT8    | ISSSSFSR                                 | S35       | 0.06426577 | 0.54021419 | 0.46076126 |
| P05787 | KRT8    | ISSSSFSR                                 | S37       | 0.17897003 | 1.57079925 | 0.55295852 |
| P05787 | KRT8    | LESQMNMMSIHTK                            | S410      | 0.63804524 | 0.85847764 | 0.82997336 |
| P05787 | KRT8    | ASLEAAIADAEQR                            | S330      | 0.87141728 | 1.01591139 | 0.94366974 |
| P05787 | KRT8    | LVSESSDVLPK                              | S475      | 0.91528757 | 1.02175769 | 0.96462519 |
| Q86UP2 | KTN1    | EIQNGNLHESDSESVPR                        | S75       | 0.1612764  | 1.16229589 | 0.54196083 |
| Q86UP2 | KTN1    | AAGDTTVIENSVDVSPETESSEK                  | S1313     | 0.25849132 | 1.15969989 | 0.5989986  |
| O00515 | LAD1    | QRTLEDEEEQER                             | T19       | 0.21916376 | 0.49842812 | 0.58267075 |
| O00515 | LAD1    | EEEADMSSPTQR                             | S356      | 0.73652286 | 0.9374289  | 0.87935705 |
| O00515 | LAD1    | NLSSTDDDEAPR                             | S38       | 0.79794595 | 0.96715742 | 0.91349783 |
| O00515 | LAD1    | EEEADMSSPTQR                             | S355      | 0.83617833 | 0.9664137  | 0.92778088 |
| Q6IAA8 | LAMTOR1 | LLDPSSPPTK                               | S26       | 0.91795641 | 1.02278703 | 0.96556856 |
| Q6PKG0 | LARP1   | SLPTTVPESPNYR                            | Y777,S766 | 0.06793921 | 0.80161054 | 0.4637455  |
| Q6PKG0 | LARP1   | SLPTTVPESPNYR                            | S774      | 0.28807449 | 0.93383138 | 0.62154849 |
| Q6PKG0 | LARP1   | ESPRPLQLPGAEGPAISDGEEGGGEPGAGGGAAGAAGAGR | S90       | 0.32648414 | 0.71883807 | 0.64734963 |
| Q659C4 | LARP1B  | LNGPGENVSEDAEQSSNQK                      | S60       | 0.05924795 | 1.24973545 | 0.45298462 |
| Q71RC2 | LARP4   | EQYVPPRSPK                               | S722      | 0.53041056 | 1.1981986  | 0.76679083 |
| Q92615 | LARP4B  | SPSPAHLPPDDPK                            | S601      | 0.55533034 | 0.96310779 | 0.78182069 |
| Q4G0J3 | LARP7   | SRPTSEGSDIESTEPQK                        | S258      | 0.05254943 | 1.1533831  | 0.44612288 |
| Q4G0J3 | LARP7   | RSSSEDAESLAPR                            | S300      | 0.11122658 | 1.86666667 | 0.51002233 |
| Q4G0J3 | LARP7   | SRPTSEGSDIESTEPQK                        | S261      | 0.24826459 | 1.22771991 | 0.59326042 |
| Q4G0J3 | LARP7   | SSSEDAESLAPR                             | S300      | 0.42858515 | 1.09040334 | 0.7137923  |
| Q4G0J3 | LARP7   | SRPTSEGSDIESTEPQK                        | S258,S261 | 0.55328742 | 0.83304701 | 0.7813313  |
| Q9Y4W2 | LAS1L   | MEVGPFTGGQESPTAENAR                      | S617      | 0.58216585 | 1.09452055 | 0.80001994 |
| Q9Y4W2 | LAS1L   | AQQQEEQGSVNDVK                           | S560      | 0.99187555 | 0.99883314 | 0.99498584 |
| O95835 | LATS1   | SNSFNNPLGNR                              | S464      | 0.0174223  | 0.78859802 | 0.36734858 |
| O95835 | LATS1   | QITTSPIVTR                               | S613      | 0.84242399 | 1.04838415 | 0.93134332 |
| P13796 | LCP1    | EGESLEDLMK                               | S257      | 0.33806307 | 1.11569579 | 0.65781985 |
| P13796 | LCP1    | GSVDEEMMELR                              | S5        | 0.77718466 | 0.95607375 | 0.90154538 |
| Q86U70 | LDB1    | MSGGSTMSSGGGNTNNSNSK                     | S302      | 0.81355743 | 0.96602356 | 0.91990355 |
| Q9Y2U8 | LEMD3   | APPAPLAASEVTNSNSAER                      | S187      | 0.43624916 | 1.24197984 | 0.71949887 |
| Q9Y2U8 | LEMD3   | ENYSDEEEDDDVASSR                         | S261      | 0.61078117 | 1.17262661 | 0.81488009 |
| Q8WVCO | LEO1    | ANSDDERPVASDNDDEK                        | S212      | 0.01104565 | 2.74689135 | 0.35993196 |
| Q8WVCO | LEO1    | QNSDDEEQPQLSDEEK                         | S238      | 0.01785714 | 5.10280713 | 0.3692765  |
| Q8WVCO | LEO1    | MQNTDDEERPQLSDDER                        | S197      | 0.0284944  | 1.43795181 | 0.40710444 |
| Q8WVCO | LEO1    | KLTSDEEGEPSGK                            | S630      | 0.09368568 | 1.25987261 | 0.5018786  |
| Q8WVCO | LEO1    | NAIASDSEADSDTEVPK                        | S300      | 0.12279359 | 2.75204472 | 0.51179861 |
| Q8WVCO | LEO1    | MQNTDDEERPQLSDDER                        | T188,S197 | 0.43775333 | 0.73051312 | 0.71992276 |
| Q8WVCO | LEO1    | YVISDEEEEDDD                             | S658      | 0.44663732 | 0.78415061 | 0.72351031 |
| Q8WVCO | LEO1    | ANSDDERPVASDNDDEK                        | S212,S220 | 0.64625261 | 1.04206978 | 0.83256287 |
| Q8WVCO | LEO1    | KYVISDEEEEDDD                            | S658      | 0.85225698 | 1.03263122 | 0.9354818  |
| P18858 | LIG1    | VLGSEGEEDDEALSPAK                        | S66       | 0.02737982 | 1.5259213  | 0.40703825 |
| P18858 | LIG1    | VLGSEGEEDDEALSPAK                        | S66,S76   | 0.04018358 | 0.67344544 | 0.43210738 |
| P18858 | LIG1    | TIQEVLEEQSEEDR                           | S141      | 0.22959027 | 0.59983102 | 0.58267075 |
| P18858 | LIG1    | EGEDGQQTTPPKPLK                          | T183      | 0.25765517 | 1.18115565 | 0.59892773 |
| P18858 | LIG1    | EWNGVVSSEDSVPK                           | S49       | 0.44868577 | 0.89210174 | 0.72373014 |
| P18858 | LIG1    | VLGSEGEEDDEALSPAK                        | S76       | 0.93972415 | 0.98528113 | 0.97418985 |
| P49916 | LIG3    | LTTTQQVTSVPK                             | S210      | 0.13731204 | 0.84034693 | 0.52372422 |
| Q9UHB6 | LIMA1   | ASSLSESPPK                               | S369      | 0.16397146 | 1.33597561 | 0.54196083 |
| Q9UHB6 | LIMA1   | ETPHSPGVEDAPIAK                          | S490      | 0.35519553 | 1.08106098 | 0.66702539 |
| Q9UHB6 | LIMA1   | SNTENLSQHFR                              | T57       | 0.65757272 | 0.91895869 | 0.84030158 |
| Q9UHB6 | LIMA1   | QWTSLSLR                                 | S15       | 0.96185892 | 1.00503356 | 0.98250904 |
| Q9UPQ0 | LIMCH1  | GSSDGRGSDSESDLPHR                        | S226      | 0.04237613 | 1.2353441  | 0.44098518 |
| Q9UPQ0 | LIMCH1  | ASVLDTSMSAGSGSPSK                        | S523      | 0.3170484  | 0.75035799 | 0.63849749 |
| Q9UPQ0 | LIMCH1  | QTPSPDVVLR                               | S217      | 0.61303875 | 1.03115872 | 0.81560563 |
| Q96GY3 | LIN37   | ERECSPSSPLPPEDEEGSEVTNSK                 | S138      | 0.24406224 | 1.18123393 | 0.58932994 |
| Q5TKA1 | LIN9    | LFSDEDDR                                 | S65       | 0.17007829 | 0.82114705 | 0.54531589 |
| Q9BU23 | LMF2    | DSGAASEQATAAPNCSSSSR                     | S699      | 0.01183711 | 33.1896601 | 0.3634964  |
| P02545 | LMNA    | SVGSGGGGFGDNLVTR                         | S636      | 0.00410062 | 1.63407821 | 0.29204389 |
| P02545 | LMNA    | TALINSTGEEVAMR                           | S533      | 0.01660384 | 1.49167376 | 0.36631449 |
| P02545 | LMNA    | SNEDQSMGNWQIK                            | S458      | 0.02400115 | 1.32368622 | 0.39586233 |
| P02545 | LMNA    | SNEDQSMGNWQIK                            | S463      | 0.08326507 | 1.24834123 | 0.49288727 |
| P02545 | LMNA    | LSPSPTSQR                                | S395      | 0.28968424 | 1.35607744 | 0.6217707  |
| P02545 | LMNA    | LQLELSK                                  | S107      | 0.32195481 | 1.16641221 | 0.64145984 |
| P02545 | LMNA    | NIYSEELR                                 | S212      | 0.35326333 | 1.26726446 | 0.66702539 |
| P02545 | LMNA    | LRLSPSPTSQR                              | S392      | 0.53836752 | 1.54174015 | 0.77155648 |
| P02545 | LMNA    | SVLLGNSSPR                               | S652      | 0.73387084 | 0.93899614 | 0.87923537 |

|        |         |                                         |           |            |            |            |
|--------|---------|-----------------------------------------|-----------|------------|------------|------------|
| P02545 | LMNA    | LRLSPSPTSQR                             | S390,S392 | 0.75168017 | 1.02541604 | 0.88774061 |
| P02545 | LMNA    | SGAQASSTPLSPTR                          | T19       | 0.80194758 | 0.95420375 | 0.91398245 |
| P02545 | LMNA    | SVGSGGGGFGDNLVTR                        | S628      | 0.82077684 | 1.02673014 | 0.92419758 |
| P02545 | LMNA    | SGAQASSTPLSPTR                          | S12       | 0.84273131 | 0.97796143 | 0.93136389 |
| P02545 | LMNA    | SGAQASSTPLSPTR                          | S22       | 0.87875905 | 0.9802336  | 0.94568481 |
| P20700 | LMNB1   | AGGPTTPLSPTR                            | S23       | 0.72355506 | 1.04212638 | 0.87410666 |
| P20700 | LMNB1   | AGGPTTPLSPTR                            | T20       | 0.73312602 | 1.04935732 | 0.87920615 |
| P20700 | LMNB1   | AGGPTTPLSPTR                            | T20,S23   | 0.86944372 | 0.95028483 | 0.94300301 |
| Q03252 | LMNB2   | AGGPATPLSPTR                            | S17       | 0.17456613 | 1.22426471 | 0.548315   |
| Q03252 | LMNB2   | LKLSPPSSR                               | S385,S387 | 0.81612895 | 1.03956044 | 0.92024886 |
| Q03252 | LMNB2   | ATSSSSGSLSATGR                          | S399      | 0.83045555 | 1.05431874 | 0.9257255  |
| Q8WW1  | LMO7    | SRSTELDDYSTNK                           | S1423     | 0.08483357 | 1.1760355  | 0.49347121 |
| Q8WW1  | LMO7    | RMYSFDDVLEEGK                           | S805      | 0.15438764 | 0.37766509 | 0.53741649 |
| Q8WW1  | LMO7    | MYSFDDVLEEGK                            | S805      | 0.17571153 | 0.81120145 | 0.54980155 |
| Q8WW1  | LMO7    | EGFESDTESEFTFK                          | S276      | 0.23233828 | 0.82375125 | 0.58402949 |
| Q8WW1  | LMO7    | SRSTELDDYSTNK                           | T1425     | 0.25977343 | 1.15257193 | 0.59994392 |
| Q8WW1  | LMO7    | REDSFESLDSLSGR                          | S246      | 0.26660605 | 1.34238311 | 0.60355868 |
| Q8WW1  | LMO7    | SYTSDLQK                                | S751      | 0.38018412 | 0.89587184 | 0.6779845  |
| Q8WW1  | LMO7    | SMSDVSAEDVQNLN                          | S704      | 0.38414318 | 1.07362439 | 0.67941113 |
| Q8WW1  | LMO7    | RGESLNDLSDPR                            | S1510     | 0.4954082  | 1.11747968 | 0.74968842 |
| Q8WW1  | LMO7    | ISINQTPGK                               | T1048     | 0.56131082 | 0.92406811 | 0.78554018 |
| Q8WW1  | LMO7    | STTELDYSTNK                             | T1424     | 0.58660261 | 1.07612903 | 0.8012074  |
| Q7L5N7 | LPCAT2  | EVQTTTASANKVSPK                         | S530      | 0.30542321 | 1.22567248 | 0.63363041 |
| P50851 | LRBA    | VEGSPTEEANLPTLQDNLSPAASEAGEK            | S1118     | 0.43974362 | 1.14128728 | 0.72004085 |
| P50851 | LRBA    | ASPNVEAPQPHR                            | S1261     | 0.54394888 | 0.90835871 | 0.77269004 |
| P50851 | LRBA    | VEGSPTEEANLPTLQDNLSPAASEAGEK            | S1135     | 0.81169328 | 1.03690987 | 0.91877983 |
| O75427 | LRRH4   | GTVEEQRPPELSPGADR                       | S380      | 0.09839629 | 0.8442256  | 0.5018786  |
| Q5VZK9 | LRR16A  | TASRPDDIPDPSPPK                         | S1291     | 0.00931782 | 0.69912257 | 0.33303827 |
| Q5VZK9 | LRR16A  | RSSGFISELPSSEEGK                        | S968      | 0.0871107  | 0.68559753 | 0.4960359  |
| Q5VZK9 | LRR16A  | SERPPTILMTEEPSPPK                       | S1094     | 0.20392113 | 0.75347476 | 0.57194083 |
| Q15345 | LRR41   | APSRDEGSLLLGSR                          | S276      | 0.01659451 | 0.71057192 | 0.36631449 |
| Q15345 | LRR41   | STQESLTAGGTDLK                          | S326      | 0.02578276 | 0.80873836 | 0.4040435  |
| Q8N1G4 | LRR47   | EEGSLDTEADAVSGQLPDPPTNSPAGK             | S520      | 0.31379815 | 0.54161067 | 0.63653708 |
| Q8IWT6 | LRR8A   | SRIEQGIVDR                              | S217      | 0.01254761 | 1.594884   | 0.36467189 |
| Q32MZ4 | LRRFIP1 | ALDNSLENDDLSAPGREPGHFNPEER              | S768      | 0.04010476 | 1.7705496  | 0.43210738 |
| Q32MZ4 | LRRFIP1 | ALDNSLENDDLSAPGREPGHFNPEER              | S766      | 0.04156861 | 0.58315036 | 0.43680889 |
| Q32MZ4 | LRRFIP1 | ALDNSLENDDLSAPGR                        | S768      | 0.04685281 | 1.53380154 | 0.44612288 |
| Q32MZ4 | LRRFIP1 | IAAESSENVDCPENPK                        | S638      | 0.1006903  | 1.57336521 | 0.5018786  |
| Q32MZ4 | LRRFIP1 | TEVPGSPAGTEGNCQEATGPSTVDTQNEPLDMKEPDEEK | S521      | 0.31354117 | 1.19153725 | 0.63653708 |
| Q32MZ4 | LRRFIP1 | CTLPEHESPSQDISDACEAESTER                | S735      | 0.35871945 | 0.95625    | 0.66991323 |
| Q32MZ4 | LRRFIP1 | EIDCLSPAEQK                             | S16       | 0.56278057 | 0.90309278 | 0.78599368 |
| Q32MZ4 | LRRFIP1 | TEVPGSPAGTEGNCQEATGPSTVDTQNEPLDMK       | S521      | 0.83508908 | 1.03930713 | 0.92778088 |
| Q32MZ4 | LRRFIP1 | IDGATQSSPAEPK                           | S714      | 0.90820778 | 1.02019289 | 0.96085522 |
| Q32MZ4 | LRRFIP1 | SDQQGEALDSSQK                           | S555      | 0.94214822 | 0.98366996 | 0.97634763 |
| Q9Y608 | LRRFIP2 | NSASATTPLSGNSSR                         | S320      | 0.08724891 | 1.34077755 | 0.4960359  |
| Q9Y608 | LRRFIP2 | GSQDTSSLIDPDTLSSELR                     | S328      | 0.2054379  | 0.68278891 | 0.57194083 |
| Q9Y608 | LRRFIP2 | RGSQDTSSLIDPDTLSSELR                    | S328      | 0.36150036 | 0.7466362  | 0.6705258  |
| Q9Y608 | LRRFIP2 | RGSQDTSSLIDPDTLSSELR                    | T331      | 0.3959734  | 0.78806548 | 0.69247075 |
| Q9Y608 | LRRFIP2 | NSASATTPLSGNSSR                         | S323      | 0.53473259 | 0.89636847 | 0.76972936 |
| Q9Y608 | LRRFIP2 | NSASATTPLSGNSSR                         | S324      | 0.60484737 | 0.94468085 | 0.81202192 |
| Q9UFC0 | LRWD1   | ACASPSAQVEGSPVAGSDGSPAVK                | S251      | 0.04900449 | 1.33927246 | 0.44612288 |
| Q9UFC0 | LRWD1   | RPDDVPLSLSPSK                           | S243      | 0.45360986 | 0.9309429  | 0.72537341 |
| Q3MHD2 | LSM12   | TETPPPLASLNVSK                          | T75       | 0.70775759 | 0.92901331 | 0.86558861 |
| Q8ND56 | LSM14A  | TQLSQGRSSPQLDPLR                        | S178,S183 | 0.03450795 | 0.6933524  | 0.41964372 |
| Q8ND56 | LSM14A  | SSPQLDPLR                               | S183      | 0.12555048 | 0.80088581 | 0.5125107  |
| Q8ND56 | LSM14A  | SSPQLDPLR                               | S183      | 0.65725293 | 0.94885496 | 0.84030158 |
| Q86X29 | LSR     | ARSDVALDLDLTPPSTAESGSR                  | S493      | 0.01431751 | 1.51775956 | 0.36631449 |
| Q86X29 | LSR     | GPALTPIRDEEWGGHSPR                      | T453,S464 | 0.04294607 | 0.62267241 | 0.44128756 |
| Q86X29 | LSR     | SVDALDLDLTPPSTAESGSR                    | S493      | 0.06599618 | 1.31062248 | 0.46283405 |
| Q86X29 | LSR     | NLALSR                                  | S643      | 0.1197873  | 1.70270029 | 0.51002233 |
| Q86X29 | LSR     | AMSEVTSLHEDDWR                          | S436      | 0.24170037 | 0.68171949 | 0.58886046 |
| Q86X29 | LSR     | SRDDLVDQDDSR                            | S530      | 0.31528932 | 1.14369035 | 0.63800725 |
| Q86X29 | LSR     | GPALTPIRDEEWGGHSPR                      | S464      | 0.86571055 | 0.95799821 | 0.94208744 |
| Q96GA3 | LTV1    | SENEDDSEWEDVDEK                         | S182      | 0.11166243 | 0.76422018 | 0.51002233 |
| Q96GA3 | LTV1    | SENEDDSEWEDVDEK                         | S188      | 0.36726711 | 0.66406534 | 0.67368198 |
| Q9Y383 | LUC7L2  | AMLDQLMGTSR                             | S18       | 0.86180184 | 1.06343242 | 0.9398826  |
| O95232 | LUC7L3  | NEVNGTSEDIKSEGDTQSN                     | S425      | 0.16844518 | 1.25053381 | 0.54531589 |
| Q86V48 | LUZP1   | SHSAPSEVGFSDAR                          | S905      | 0.56730899 | 0.90925407 | 0.78987432 |
| Q86V48 | LUZP1   | SSTDFSELEQPR                            | S956      | 0.70157729 | 1.12696048 | 0.86274503 |
| P07948 | LYN     | DSLSDDGVDLK                             | S13       | 0.07223025 | 1.16187871 | 0.46528233 |
| P07948 | LYN     | GKDSLSDDGVDLK                           | S11       | 0.16806814 | 1.12886206 | 0.54531589 |
| P07948 | LYN     | VIEDNEYTAR                              | Y397      | 0.22364666 | 0.61309524 | 0.58267075 |
| Q9UPN3 | MACF1   | RQGSFSEDVISHK                           | S3927     | 0.15176638 | 1.49910555 | 0.53741649 |
| Q9UPN3 | MACF1   | SMDAMSSPTK                              | T4498     | 0.17033087 | 1.25162088 | 0.54531589 |
| Q9UPN3 | MACF1   | QGSFSEDVISHK                            | S3927     | 0.19144336 | 0.92128552 | 0.5651429  |
| Q9UPN3 | MACF1   | AFLAELEQNSPK                            | S4521     | 0.72695743 | 1.02362205 | 0.87523758 |
| Q8WXG6 | MADD    | EGTHATCASEEGGTESSESGSLQPLSADSTPDVNVQSPR | S156      | 0.99202621 | 1.00365716 | 0.99498584 |
| Q9UNF1 | MAGED2  | HLDGEEGDSSDQSQASGTTGGR                  | S191      | 0.00492763 | 1.64031972 | 0.29204389 |
| Q5TCQ9 | MAGI3   | QPEDSSQAFISTQNGSPR                      | S857      | 0.66421363 | 1.06456192 | 0.84417266 |
| Q5TCQ9 | MAGI3   | MDSLPEEEEEDEK                           | S235      | 0.75903817 | 1.05824911 | 0.88966056 |
| P46821 | MAP1B   | ASVSPMDEPVPDESPIEK                      | S1378     | 0.00859518 | 1.29515419 | 0.3318662  |



|        |          |                                           |             |             |            |            |
|--------|----------|-------------------------------------------|-------------|-------------|------------|------------|
| P46821 | MAP1B    | SPSLSPSPSPLEK                             | S1265       | 0.01767281  | 1.42638865 | 0.36782257 |
| P46821 | MAP1B    | ASVSPMDEPVPDSESPIEK                       | S1389       | 0.03737187  | 1.53325272 | 0.42957843 |
| P46821 | MAP1B    | ESSPLYSPFSDSTSAVK                         | S1793       | 0.05011194  | 1.23942209 | 0.44612288 |
| P46821 | MAP1B    | SLMSSPEDLTG                               | S832        | 0.06941906  | 1.35190017 | 0.4637455  |
| P46821 | MAP1B    | VQSLEGEKLSPK                              | S1779       | 0.15071339  | 1.65715454 | 0.53664613 |
| P46821 | MAP1B    | FEDEGAGFEESSETGDYEEK                      | S937        | 0.22337239  | 1.25164474 | 0.58267075 |
| P46821 | MAP1B    | ESSPLYSPFSDSTSAVK                         | S1793,S1797 | 0.64933078  | 0.86581842 | 0.83491453 |
| P46821 | MAP1B    | GAESPFEK                                  | S1427       | 0.71316891  | 1.06295548 | 0.86856453 |
| P46821 | MAP1B    | QGSPPQVSPVSEMTSTLSYQDK                    | S1438       | 0.75196781  | 1.12494918 | 0.88774061 |
| P46821 | MAP1B    | SPSDSGYSYETIGK                            | S1915       | 0.78457642  | 0.93271912 | 0.90620964 |
| P46821 | MAP1B    | GEAEQSEEEADEEDK                           | S1016       | 0.98798848  | 0.99623825 | 0.99415185 |
| Q66K74 | MAP1S    | AVPMAPAPASPGSSNDSSAR                      | S759        | 0.06361778  | 1.33432172 | 0.46076126 |
| Q66K74 | MAP1S    | LSLSPLR                                   | S657        | 0.3234259   | 1.28569016 | 0.6432626  |
| P11137 | MAP2     | VDHGAEITQSPGR                             | S1782       | 0.14767861  | 1.13488881 | 0.53170891 |
| P11137 | MAP2     | KETSPESLIQDEIAVK                          | S1158       | 0.48648947  | 0.83225686 | 0.74328043 |
| P11137 | MAP2     | ETSPESLIQDEIAVK                           | T1154       | 0.81459821  | 0.969222   | 0.91990355 |
| P36507 | MAP2K2   | LNQPGTPTTR                                | T394        | 0.52554843  | 1.1015605  | 0.76473579 |
| Q9Y2U5 | MAP3K2   | AQSYPDNHQEFSDYDNPFEK                      | S239        | 0.21361188  | 0.5363354  | 0.58004915 |
| P27816 | MAP4     | DVTPPPETEVLK                              | T521        | 0.04864239  | 1.18461539 | 0.44612288 |
| P27816 | MAP4     | KCSLPAEEDSVLEK                            | S636        | 0.11660929  | 1.35625597 | 0.51002233 |
| P27816 | MAP4     | DMSPLSETEMALGK                            | S507        | 0.21378161  | 1.1412565  | 0.58004915 |
| P27816 | MAP4     | EAQTLDSIQQETSI                            | S1151       | 0.5874496   | 1.14481562 | 0.80197527 |
| P27816 | MAP4     | DMSPLSETEMALGK                            | T512        | 0.64305278  | 1.04769148 | 0.83055345 |
| P27816 | MAP4     | DGVLTLANNVTPAK                            | T571        | 0.68747073  | 0.90961947 | 0.85494209 |
| P27816 | MAP4     | LATNTSAPDLK                               | S928        | 0.93976405  | 0.97763781 | 0.97418985 |
| O95819 | MAP4K4   | RDSPLQSGGQQNSQAGQR                        | S639        | 0.39343476  | 0.906588   | 0.69016887 |
| O95819 | MAP4K4   | AASSNLNSGETESVK                           | S805        | 0.6428256   | 1.08612251 | 0.83055345 |
| Q9Y4K4 | MAP4K5   | ISSYPEDNFPDEEK                            | S400        | 0.03518881  | 0.76178727 | 0.42085354 |
| Q9Y4K4 | MAP4K5   | RQSSPCGPPVAETSSIGNGDGISK                  | S433        | 0.68987121  | 1.09973404 | 0.85682002 |
| Q14244 | MAP7     | SVSTMNLSK                                 | S183        | 0.11681606  | 1.19502406 | 0.51002233 |
| Q3KQU3 | MAP7D1   | CSVSAVNLPK                                | S254        | 0.11878044  | 0.57336724 | 0.51002233 |
| Q3KQU3 | MAP7D1   | RSSQSPPTAVPASDSPPTK                       | S113,S116   | 0.23250082  | 0.87826087 | 0.58402949 |
| Q3KQU3 | MAP7D1   | RSSQSPPTAVPASDSPPTK                       | S113        | 0.29947499  | 0.85607094 | 0.62652809 |
| Q3KQU3 | MAP7D1   | LSASTASELSPK                              | S460        | 0.45034421  | 0.84034833 | 0.72422173 |
| Q3KQU3 | MAP7D1   | ESAAPASPAPSPAPSPPTAPPQK                   | S544,S552   | 0.65290788  | 0.9409621  | 0.83782054 |
| Q3KQU3 | MAP7D1   | RSSQSPPTAVPASDSPPTK                       | S116        | 0.72165231  | 0.96248349 | 0.87405855 |
| Q3KQU3 | MAP7D1   | SSATLWNSPSR                               | S274        | 0.948882548 | 1.00704935 | 0.9788835  |
| Q49NM5 | MAP9     | MNDFHISDDEEK                              | S79         | 0.83170549  | 1.02290076 | 0.92586131 |
| P28482 | MAPK1    | VADPDHDHTGFLTEYVATR                       | Y187        | 0.09921199  | 0.17793481 | 0.5018786  |
| Q16539 | MAPK14   | HTDDEMTGYVATR                             | Y182,T180   | 0.00856491  | 0.18244032 | 0.3318662  |
| Q16539 | MAPK14   | HTDDEMTGYVATR                             | Y182        | 0.50993089  | 1.27392879 | 0.75633887 |
| P27361 | MAPK3    | IADPEHDHTGFLTEYVATR                       | Y204        | 0.19091242  | 0.22664888 | 0.5651429  |
| Q16659 | MAPK6    | GHLSEGLVTK                                | S189        | 0.0831765   | 1.46834063 | 0.49288727 |
| Q13164 | MAPK7    | SQVEDLPPVFSGTPK                           | S731        | 0.75750229  | 0.96721344 | 0.88966056 |
| P29966 | MARCK5   | EAPAEGEAAEPGSPTAAEAGEAASASSTSSPK          | T133        | 0.00292774  | 1.40967019 | 0.29204389 |
| P29966 | MARCK5   | AEDGATPSPSNETPKK                          | S145,S147   | 0.07461608  | 0.76281043 | 0.47168775 |
| P29966 | MARCK5   | LSGFSFK                                   | S170        | 0.20759128  | 1.10606639 | 0.57287379 |
| P29966 | MARCK5   | GEPAAAAPEAGASPVK                          | S101        | 0.23240363  | 1.19954904 | 0.58402949 |
| P29966 | MARCK5   | AEDGATPSPSNETPK                           | T150,S145   | 0.26720939  | 1.53946278 | 0.60403212 |
| P29966 | MARCK5   | AEDGATPSPSNETPK                           | S145        | 0.29422444  | 0.80940844 | 0.62281368 |
| P29966 | MARCK5   | RFSFK                                     | S159        | 0.33623732  | 1.58755556 | 0.65732844 |
| P29966 | MARCK5   | EAPAEGEAAEPGSPTAAEAGEAASASSTSSPK          | S134        | 0.36974933  | 0.85720779 | 0.67368198 |
| P29966 | MARCK5   | GEAAAERPGEAAVASSPSK                       | S26         | 0.4446206   | 1.14022617 | 0.72259246 |
| P29966 | MARCK5   | AEDGATPSPSNETPKK                          | T150        | 0.57758559  | 1.06       | 0.7967435  |
| P29966 | MARCK5   | GEAAAERPGEAAVASSPSK                       | S27         | 0.57854169  | 1.10772164 | 0.79725566 |
| P29966 | MARCK5   | AEDGATPSPSNETPK                           | S147        | 0.58848524  | 1.10806916 | 0.80250619 |
| P29966 | MARCK5   | EAPAEGEAAEPGSPTAAEAGEAASASSTSSPK          | S118,S135   | 0.59716817  | 0.86563583 | 0.8075237  |
| P29966 | MARCK5   | EAPAEGEAAEPGSPTAAEAGEAASASSTSSPK          | S135        | 0.65627583  | 1.08203335 | 0.83980398 |
| P29966 | MARCK5   | EAPAEGEAAEPGSPTAAEAGEAASASSTSSPK          | T120        | 0.73504479  | 0.93838642 | 0.87923537 |
| P29966 | MARCK5   | EEPAAGSGAASPSAAEK                         | S81         | 0.89039405  | 0.97545709 | 0.95050007 |
| P49006 | MARCKSL1 | GEGESPPVNGTDEAAGATGDAIEAPPSPQGAEK         | S48         | 0.0252187   | 1.33454031 | 0.4040435  |
| P49006 | MARCKSL1 | EGGGDSSASSPTEEEQEQGEIGACSDGTAQEGK         | S135        | 0.06136376  | 1.65967688 | 0.45713107 |
| P49006 | MARCKSL1 | GAEASAASEEEAGPQATEPSTPSGPESGPTPASAQNE     | T174        | 0.0779162   | 1.50775416 | 0.48245234 |
| P49006 | MARCKSL1 | GDVTAEEAAGASPAK                           | S22         | 0.23512977  | 1.19415552 | 0.58536202 |
| P49006 | MARCKSL1 | GAEASAASEEEAGPQATEPSTPSGPESGPTPASAQNE     | T178        | 0.39207559  | 1.13951187 | 0.68861889 |
| P49006 | MARCKSL1 | EGGGDSSASSPTEEEQEQGEIGACSDGTAQEGK         | S120        | 0.48130721  | 1.13410222 | 0.74108884 |
| P49006 | MARCKSL1 | AAATPESQEPQAK                             | T148        | 0.49568673  | 1.14586965 | 0.74968842 |
| Q7KZ17 | MARK2    | GRNSATSADQPHIGNYR                         | S40         | 0.00219551  | 0.51716868 | 0.29204389 |
| Q7KZ17 | MARK2    | VPASPLPGLER                               | S456        | 0.43086055  | 1.09386027 | 0.71568235 |
| P27448 | MARK3    | SSELDASDSSSSNLSLAK                        | S378        | 0.01440913  | 1.23834532 | 0.36631449 |
| P27448 | MARK3    | SSELDASDSSSSNLSLAK                        | S377        | 0.08469033  | 1.15983518 | 0.49347121 |
| Q8N4S9 | MARVELD2 | DPYGLSLDR                                 | S161        | 0.27336541  | 1.25290886 | 0.60684527 |
| Q8N4S9 | MARVELD2 | YISDGVCEPPASPARNHR                        | S116,S120   | 0.58435401  | 1.05220772 | 0.80108627 |
| O15021 | MAST4    | KHSLEVTQEEVQR                             | S1470       | 0.9924416   | 0.99876418 | 0.99498584 |
| Q96GX5 | MASTL    | NFELVDSSPCK                               | S453        | 0.66188193  | 0.94149624 | 0.8423578  |
| P43243 | MATR3    | NEENTEPGAESSENADDPNK                      | S747        | 0.11857313  | 1.22741433 | 0.51002233 |
| P43243 | MATR3    | DTSENADGQSDENKDDYTIPTDEYR                 | S766        | 0.25868836  | 1.51299907 | 0.5989986  |
| Q7Z434 | MAVS     | EPSYMPVQETQAPESPGENSEQALQTLSPR            | S165        | 0.50111584  | 0.690318   | 0.75168596 |
| Q9UBB5 | MBD2     | CCPEQEEGESAAAGGSGAGGDSIAEQGGGQALAPSPVSGVR | S47         | 0.35045973  | 1.45508811 | 0.66622457 |
| O95243 | MBD4     | SLSSGNSFCSEKQ                             | S318        | 0.88858485  | 0.98632072 | 0.94927317 |
| Q96N66 | MBOAT7   | AGGGPTLQCPPPSSPEK                         | S285        | 0.06571153  | 1.52355393 | 0.46184181 |

|        |          |                                  |           |            |            |            |
|--------|----------|----------------------------------|-----------|------------|------------|------------|
| P02686 | MBP      | TTSEDNEVFGEDANQNNGTSSQDQTAVTDSK  | S40       | 0.03067419 | 1.2803579  | 0.40879194 |
| P49736 | MCM2     | GNDPLTSSPGR                      | S27       | 0.3121522  | 1.11528095 | 0.63653708 |
| P49736 | MCM2     | GLLYDSDEEDEERPAR                 | S139      | 0.48275194 | 0.86494827 | 0.74124595 |
| P49736 | MCM2     | RGNDDLPTSSPGR                    | S26       | 0.49384173 | 1.08564815 | 0.74865292 |
| P25205 | MCM3     | SEDESETEDEEEK                    | S672      | 0.14345105 | 1.83154275 | 0.5281867  |
| O60318 | MCM3AP   | KPGDGEVSPSTEDAPFHQSPLGK          | S527      | 0.74925201 | 1.07876049 | 0.8870044  |
| Q14566 | MCM6     | EIESEIDSEELINK                   | S762      | 0.84560283 | 0.94014155 | 0.93222923 |
| Q14676 | MDC1     | TPEPVVPTAPEPHPTTSDQPVTPK         | T1608     | 0.18566685 | 1.30214116 | 0.55994868 |
| Q14676 | MDC1     | GPGAPGLAHLQESQAGSDTDEVEEGK       | S376      | 0.27681965 | 1.15754234 | 0.61040342 |
| Q14676 | MDC1     | AIPGDQHPESPVHTEPMGIQGR           | S793      | 0.56823981 | 1.16284609 | 0.79044838 |
| Q9NU22 | MDN1     | AEENTDQASPQEDYAGFER              | S4538     | 0.00021548 | 1.32120364 | 0.10490076 |
| Q9NU22 | MDN1     | NGGEDTDNEEGEEENPLEIK             | T4898     | 0.63775592 | 0.88258794 | 0.82993166 |
| Q9NU22 | MDN1     | GETETDQNESQSPQEPPEEGPSEDDK       | S4937     | 0.92765601 | 1.03791331 | 0.96785844 |
| Q86V88 | MDP1     | AQTGPLRSSLEESPFEA                | S167      | 0.66995076 | 1.18245027 | 0.84655744 |
| P51608 | MECP2    | AETSEGSASPAPVEASASP              | S80       | 0.24259007 | 1.19508671 | 0.58886046 |
| P51608 | MECP2    | MPFQTSPPGGK                      | S229      | 0.69776803 | 0.97107166 | 0.86146179 |
| Q15648 | MED1     | LPSTSDDCPAIGTPLR                 | S795      | 0.92817946 | 0.96293963 | 0.96804979 |
| Q9UHV7 | MED13    | KYSASSGGLCEEATAAK                | S395      | 0.04731694 | 0.68418183 | 0.44612288 |
| Q9UHV7 | MED13    | IEVDEGFCSPKPEIK                  | S890      | 0.31288551 | 1.09115117 | 0.63653708 |
| Q71F56 | MED13L   | MEVEDGLGSPKPEIK                  | S923      | 0.22619603 | 1.17082294 | 0.58267075 |
| O60244 | MED14    | KLSDDPCPVESK                     | S617      | 0.46351118 | 1.12012794 | 0.72929075 |
| O75448 | MED24    | LLSSNEDDANILSSPTDR               | S862      | 0.11541022 | 1.25984991 | 0.51002233 |
| Q02078 | MEF2A    | GCDSPPDTSYVLTPTHEEK              | S98       | 0.56594278 | 1.06648936 | 0.7889937  |
| Q14814 | MEF2D    | GFNGCDSPEPDGEDSLEQSPLLEDK        | S98       | 0.29088998 | 1.20127173 | 0.62187612 |
| Q14814 | MEF2D    | RASEELDGLFR                      | S121      | 0.64410173 | 0.89168921 | 0.83081654 |
| Q14680 | MELK     | VFGSLER                          | S529      | 0.3267345  | 0.82180437 | 0.64744809 |
| Q7L2J0 | MEPCE    | CAPSAGSPAAAVGR                   | S60       | 0.45112696 | 1.08236347 | 0.72422173 |
| Q7L2J0 | MEPCE    | ESPGAAATSSSGPQAQQHR              | S69       | 0.61932295 | 0.9303865  | 0.81882617 |
| P08581 | MET      | SVSPPTMEMVSNESVDYR               | S988      | 0.21594071 | 1.21979387 | 0.58136831 |
| Q86U44 | METTL3   | DHTPSQELALQSVGGDSSADR            | T348      | 0.26115964 | 1.21753009 | 0.60088416 |
| Q86U44 | METTL3   | NPEAALSPTFR                      | S43       | 0.28688588 | 0.91854957 | 0.62030418 |
| P55081 | MFAP1    | IVEPEVVGESDSEVEGDRAWR            | S116      | 0.23497054 | 1.31186757 | 0.58536202 |
| Q6ZSS7 | MFSD6    | VAILTDEEEQK                      | T10       | 0.41440217 | 1.17481447 | 0.70808337 |
| Q8IW19 | MGA      | QLAEPASEPDVLK                    | S2882     | 0.08528649 | 0.64201467 | 0.49393301 |
| Q8IW19 | MGA      | GFDNPEENSSEFPVTFK                | S2088     | 0.96189706 | 1.01330674 | 0.98250904 |
| Q8IW19 | MGA      | VVNANQNASPNVPGK                  | S607      | 0.98145691 | 1.01678718 | 0.99062773 |
| O60502 | MGEA5    | SPEMSMDQEDCISDIAPMQTDEQTNK       | S511      | 0.31357684 | 0.67307333 | 0.63653708 |
| O60291 | MGRN1    | AASIENVLQDSSPEHCGR               | S524      | 0.01058113 | 1.24736842 | 0.35060945 |
| O60291 | MGRN1    | SPSSPIHEEDEEK                    | S460      | 0.12841523 | 1.30911332 | 0.5125107  |
| Q7RTP6 | MICAL3   | LGSPPLAVDEALR                    | S1310     | 0.11565096 | 0.71245133 | 0.51002233 |
| Q7RTP6 | MICAL3   | DRLGSPPLAVDEALR                  | S1310     | 0.61421397 | 1.10681832 | 0.81608495 |
| Q8N3F8 | MICALL1  | VEQMPQASPLAPR                    | S578      | 0.19219162 | 1.18854887 | 0.5651429  |
| O15344 | MID1     | ASVSGPNSPSETR                    | S98       | 0.7050695  | 0.92774785 | 0.86527488 |
| Q8N108 | MIER1    | DSSGQEDETQSSNDDPSQVSAQDAQEIIIRPR | T128      | 0.19289073 | 1.42034935 | 0.5651429  |
| Q8N108 | MIER1    | DSSGQEDETQSSNDDPSQVSAQDAQEIIIRPR | S122      | 0.44742811 | 1.15567438 | 0.72351031 |
| Q8N108 | MIER1    | VNSNGKESPGSEFFQEAIVSHGK          | S483,S488 | 0.73486771 | 0.91436315 | 0.87923537 |
| Q9NXC5 | MIOS     | GFSQYGVGSGPTK                    | S766      | 0.64312539 | 0.96828465 | 0.83055345 |
| Q8IVT2 | MISP     | ALSSDSILSPAPDAR                  | S395      | 0.00094986 | 0.58032596 | 0.22363976 |
| Q8IVT2 | MISP     | SSTVATLQGTDPDHGDPR               | S156      | 0.00119754 | 0.25247187 | 0.22363976 |
| Q8IVT2 | MISP     | SQSSDLLER                        | S541      | 0.00873836 | 0.49818301 | 0.3318662  |
| Q8IVT2 | MISP     | RALSSDSILSPAPDAR                 | S394      | 0.03351088 | 2.06650161 | 0.41579265 |
| Q8IVT2 | MISP     | NALFPEVFSPTPDENSQNSR             | S575      | 0.08382439 | 0.7441509  | 0.49347121 |
| Q8IVT2 | MISP     | LSLITAPR                         | S335      | 0.1208407  | 0.46988293 | 0.51002233 |
| Q8IVT2 | MISP     | NALFPEVFSPTPDENSQNSR             | T577      | 0.16892827 | 0.75585586 | 0.54531589 |
| Q8IVT2 | MISP     | ALSSDSILSPAPDAR                  | S394      | 0.23235262 | 1.26611069 | 0.58402949 |
| Q8IVT2 | MISP     | SQSSDLLER                        | S543      | 0.8552957  | 0.9181619  | 0.93690455 |
| P46013 | MKI67    | SSPELEDTATSSK                    | S2828     | 0.01292743 | 1.59821429 | 0.36582345 |
| P46013 | MKI67    | SPPPEMMDTPTSTR                   | S2105     | 0.08961914 | 1.42462312 | 0.4960359  |
| P46013 | MKI67    | SGGSGHAVAEPASPEQELDQNK           | S308      | 0.09509022 | 1.26637555 | 0.5018786  |
| P46013 | MKI67    | SPPPEVSDTPTSTK                   | S1131     | 0.24550307 | 1.2964527  | 0.58971922 |
| P46013 | MKI67    | DINTFVGTPEVK                     | T1923     | 0.52830869 | 0.82935705 | 0.76614217 |
| P46013 | MKI67    | TPVQYQQQNSPQK                    | S357      | 0.82299073 | 0.96931408 | 0.92458845 |
| P46013 | MKI67    | SPQPDVDTPTASTK                   | S2344     | 0.90718123 | 1.02352419 | 0.96047477 |
| Q969V6 | MKL1     | AGSCCLSPGGR                      | S511      | 0.15462761 | 0.67401141 | 0.53741649 |
| Q71F23 | MLF1P    | SSDTSNGNEASEIESVK                | S111      | 0.19917557 | 0.7830863  | 0.56975265 |
| Q15773 | MLF2     | LAIQGPEDSPSR                     | S238      | 0.00550255 | 0.59633352 | 0.29892804 |
| P40692 | MLH1     | HRESDVEMVEDDSR                   | S477      | 0.35965166 | 0.81158779 | 0.67026935 |
| P55196 | MLLT4    | SSPNVANQPSPSPGGK                 | S1182     | 0.08236188 | 1.12372881 | 0.49194574 |
| P55196 | MLLT4    | LFSQGDVSNK                       | S1799     | 0.34463788 | 0.8424102  | 0.66293814 |
| P55196 | MLLT4    | TISNPEVVMK                       | S216      | 0.71841231 | 1.0519802  | 0.87275421 |
| Q9BV36 | MLPH     | ASSESQIFELNK                     | S336      | 0.23921007 | 0.8626836  | 0.8659409  |
| Q9Y6X9 | MORC2    | SPPLPAVIR                        | S615      | 0.5049314  | 1.17777711 | 0.75314323 |
| Q9Y6X9 | MORC2    | SVAVSDEEEVEEEAER                 | S743      | 0.64162582 | 0.83252246 | 0.83055345 |
| Q14149 | MORC3    | RLSSQFENSVMK                     | S560      | 0.77893267 | 0.95873321 | 0.90292375 |
| Q15014 | MORF4L2  | SAENPPSGSVR                      | S71       | 0.59301465 | 1.13819526 | 0.80595083 |
| Q8NHP6 | MOSP2    | ETLETISNEEQTPLLK                 | S283      | 0.01586361 | 1.90426918 | 0.36631449 |
| Q99549 | MPHOSPH8 | GLWSTDSAAEEDK                    | S403      | 0.10378945 | 1.20670391 | 0.50572948 |
| Q99549 | MPHOSPH8 | GAEAFGDSEEDGEDVFEVEK             | S51       | 0.59195182 | 0.88501484 | 0.80543398 |
| Q8N3R9 | MPP5     | KQELDLNNSMR                      | S84       | 0.24245763 | 0.86220781 | 0.58886046 |
| Q6WCC1 | MPRIP    | SPDSATVSGYDIMK                   | S977      | 0.1006772  | 1.28678813 | 0.5018786  |
| Q6WCC1 | MPRIP    | DQPDGSSLSAQSPSQSPPAASSLR         | S218      | 0.19531343 | 1.37151703 | 0.56712974 |

|        |         |                                 |             |            |            |            |
|--------|---------|---------------------------------|-------------|------------|------------|------------|
| Q6WCQ1 | MPRIP   | SPGLPMSDLK                      | S619        | 0.35384704 | 0.78170666 | 0.66702539 |
| Q6WCQ1 | MPRIP   | AEEQQLPPPLSPPSPSTPNHR           | S289,S294   | 0.6705002  | 1.05685754 | 0.84658851 |
| Q6WCQ1 | MPRIP   | TLLTGDGGGATGSPLAQKQ             | S891        | 0.87988953 | 0.96168179 | 0.94646727 |
| O95297 | MPZL1   | SESVVYADIR                      | Y263        | 0.07219649 | 0.72677469 | 0.46528233 |
| O95297 | MPZL1   | DYTGCTSESLSPVK                  | T205        | 0.27108259 | 0.76291067 | 0.60553604 |
| O95297 | MPZL1   | DYTGCTSESLSPVK                  | S210        | 0.44337555 | 1.1049445  | 0.72238826 |
| Q9NV56 | MRGBB   | VLANSNPSSPAAK                   | S194        | 0.726055   | 1.06299555 | 0.87523758 |
| P52701 | MSH6    | SEEDNEIESEEVQPK                 | S227        | 0.15118489 | 1.15164221 | 0.53741649 |
| P52701 | MSH6    | VHVQFFDSDPTR                    | S137        | 0.21775646 | 0.74671775 | 0.58142167 |
| Q86UE4 | MTDH    | SQEPIDDDKQVSDDDK                | S426        | 0.00472221 | 1.22857143 | 0.29204389 |
| Q86UE4 | MTDH    | TISTSDPAEVLVK                   | S494        | 0.0681972  | 0.26640216 | 0.4637455  |
| Q86UE4 | MTDH    | LSSQISAGEEK                     | S298        | 0.16683235 | 0.80107347 | 0.54308896 |
| Q86UE4 | MTDH    | WNSVSPASAGK                     | S308        | 0.43344928 | 1.13232831 | 0.71855466 |
| Q15390 | MTFR1   | QISLPDLSQEPEQLK                 | S119        | 0.27945073 | 0.53199314 | 0.61285387 |
| Q9H019 | MTFR1L  | NASVPNLR                        | S103        | 0.14848472 | 0.65503842 | 0.53335371 |
| Q13614 | MTMR2   | ASSPAQCVTVQTVV                  | S631        | 0.48765333 | 0.86836615 | 0.74374863 |
| Q13615 | MTMR3   | SYDNLTTACDNTVPLASR              | S613        | 0.72405103 | 0.88749298 | 0.87410666 |
| P42345 | MTOR    | TLDQSPELR                       | S1166       | 0.50029772 | 1.08272102 | 0.75168596 |
| Q765P7 | MTSS1L  | AGSEECVFYTDETASPLADLAK          | S612        | 0.20532777 | 0.31084828 | 0.57194083 |
| Q5HY17 | MTX3    | LTPAEENNSFQLRSP                 | S311        | 0.07239087 | 1.38065508 | 0.46528233 |
| Q96NY9 | MUS81   | TSGGDHAPDSPSGENSPAPQGR          | S95         | 0.66192716 | 1.06689696 | 0.8423578  |
| Q96EY5 | MVB12A  | DMQGLSLDAAASQPSK                | S170        | 0.07052003 | 0.59960159 | 0.46523029 |
| P84157 | MXRA7   | GPSSEGPEEEDGEGFSFK              | S127        | 0.46601329 | 0.95669657 | 0.73040295 |
| Q9BQG0 | MYBBP1A | EIPSATQSPISK                    | S1163       | 0.36039052 | 0.91176471 | 0.6705258  |
| P10244 | MYBL2   | EEENSEEELAAATTSK                | S241        | 0.50640697 | 1.05391339 | 0.75314323 |
| O75592 | MYCBP2  | SKSDSYTLDPDTLR                  | S2833       | 0.40661044 | 0.88611355 | 0.69976652 |
| O75592 | MYCBP2  | VNSGDTEVGSLLR                   | S3467       | 0.63927587 | 1.03221565 | 0.83055345 |
| Q9P2K5 | MYEF2   | AEVPGATGGDSPHLQPAEPPGPEPR       | S17         | 0.02068111 | 1.31363331 | 0.37949754 |
| Q72406 | MYH14   | LEEGVASDEEAEEAQSGSPSPEPEGSPAHPQ | S1969       | 0.15727264 | 1.28202807 | 0.53741649 |
| Q72406 | MYH14   | LEEGVASDEEAEEAQSGSPSPEPEGSPAHPQ | S1969,S1983 | 0.75401448 | 0.9050911  | 0.88807985 |
| P35579 | MYH9    | DELADEIANSSGK                   | S1714       | 0.44434136 | 1.06708023 | 0.72250264 |
| Q92614 | MYO18A  | SLAPDRSDEHDPLDNTSRPR            | S2020       | 0.28911093 | 0.88470588 | 0.62154849 |
| Q92614 | MYO18A  | SSSPTSYYWK                      | S2007       | 0.44632931 | 1.14071681 | 0.72351031 |
| Q92614 | MYO18A  | SRDESASETSTPSEHSAAPSQVEVR       | S145        | 0.67629711 | 1.10898083 | 0.85001908 |
| Q12965 | MYO1E   | NQYVYPHAPGSQR                   | S980        | 0.02542098 | 0.63392319 | 0.4040435  |
| Q8WXR4 | MYO3B   | NESAAHNQAGDTSNQSSGPHSPVAAGTR    | S1135       | 0.24706701 | 0.79544717 | 0.59215319 |
| Q8WXR4 | MYO3B   | RNESAAHNQAGDTSNQSSGPHSPVAAGTR   | S1135       | 0.83172538 | 0.97246152 | 0.92586131 |
| Q13459 | MYO9B   | VSPAPGSAPEPEDK                  | T1271,S1267 | 0.03741833 | 0.83488239 | 0.42957843 |
| Q13459 | MYO9B   | KPGDASSLPDAGLSPGSQVDSK          | S1405       | 0.14728704 | 0.78245217 | 0.53170891 |
| Q13459 | MYO9B   | VQEKPDSPGGSTQIQR                | S1290       | 0.28270852 | 1.11378641 | 0.61747982 |
| Q13459 | MYO9B   | RTSFSTSDVSK                     | S1354       | 0.72061649 | 1.04964539 | 0.87405855 |
| Q9NZM1 | MYOF    | GPVGTVSEAQLAR                   | S174        | 0.52103717 | 1.08992161 | 0.76229747 |
| P41227 | NAA10   | GNSPPSSGAEACREEK                | S186        | 0.20732789 | 1.65887395 | 0.57287379 |
| Q9BXJ9 | NAA15   | ITVNGDSSAAEELANEI               | S856        | 0.32145087 | 0.65263734 | 0.64145984 |
| Q9BXJ9 | NAA15   | ITVNGDSSAAEELANEI               | S855        | 0.52296517 | 0.71928777 | 0.76304189 |
| Q147X3 | NAA30   | CPFPAGAALACCSEDEEDDEEHEGGGSR    | S39         | 0.30643891 | 0.68031854 | 0.63401508 |
| Q13506 | NAB1    | QSSEHSPNGLTSDNSDGGQGERPLNLR     | S403        | 0.31195423 | 0.91356322 | 0.63653708 |
| Q15742 | NAB2    | APSPTAEQPPGGGDSAR               | S6          | 0.35419372 | 1.25038968 | 0.66702539 |
| Q13765 | NACA    | SPASDTYIVFGEAK                  | S114        | 0.12686705 | 0.67993903 | 0.5125107  |
| Q96HR8 | NAF1    | NDQEPPEALDFSDDEK                | S315        | 0.60268544 | 1.07076664 | 0.81180092 |
| Q9UJ70 | NAGK    | SLGLSLGGDQEDAGR                 | S76         | 0.72426754 | 0.88573281 | 0.87410666 |
| Q99733 | NAP1L4  | EFITGDVEPTDAESEWHSENEEEEEK      | S125        | 0.25358992 | 0.51783215 | 0.59603736 |
| P49321 | NASP    | SVSGTDVQEECR                    | S244        | 0.31207038 | 1.09242144 | 0.63653708 |
| P49321 | NASP    | TEDESLVENNDNIDEAR               | S127        | 0.55439547 | 0.85231422 | 0.78182069 |
| Q8NEY1 | NAV1    | VNSNSLDLPSSDTHASK               | S808        | 0.85219681 | 1.02303754 | 0.9354818  |
| Q8IVL1 | NAV2    | GISSDNESVASCNSVK                | S1279       | 0.65156021 | 0.94817409 | 0.8374236  |
| O60934 | NBN     | IPNYQLSPTK                      | S432        | 0.4387378  | 0.94245928 | 0.71992276 |
| O60934 | NBN     | MLSQDAPTVK                      | S397        | 0.44645645 | 0.83024511 | 0.72351031 |
| Q15021 | NCAPD2  | YQPLASTASDNDVFTPEPR             | S1330       | 0.24352121 | 0.66761111 | 0.58932994 |
| Q15021 | NCAPD2  | YQPLASTASDNDVFTPEPR             | S1333       | 0.44737256 | 0.80176315 | 0.72351031 |
| Q9BPX3 | NCAPG   | CQTAEADSESDHEVPEPESEM           | S975        | 0.05115718 | 1.36877828 | 0.44612288 |
| Q9BPX3 | NCAPG   | TLHCEGTEINSDEQESK               | S674        | 0.24192234 | 0.87906211 | 0.58886046 |
| Q09161 | NCBP1   | TSANETEDHLESICK                 | T21         | 0.18802092 | 0.50567432 | 0.56058734 |
| Q09161 | NCBP1   | TSANETEDHLESICK                 | S22         | 0.20684608 | 0.57233883 | 0.57287379 |
| Q09161 | NCBP1   | TSANETEDHLESICK                 | S22         | 0.60215967 | 0.67466351 | 0.81143153 |
| P16333 | NCK1    | RKPSVPDSASPADDVDPGER            | S85         | 0.10082848 | 0.7639201  | 0.5018786  |
| P19338 | NCL     | GLSEDTTEETLK                    | S580        | 0.09368531 | 2.25709481 | 0.5018786  |
| P19338 | NCL     | GFGFVDFNSEEDAK                  | S619        | 0.70672901 | 0.96790272 | 0.86558861 |
| P19338 | NCL     | VVVSPTK                         | T69         | 0.81664724 | 0.95906155 | 0.92051153 |
| Q9Y6Q9 | NCOA3   | TPHDILEDINASPENR                | S214        | 0.31591755 | 0.6840355  | 0.63800725 |
| Q9HCD5 | NCOA5   | SSTDSLPGPISR                    | T379        | 0.24103931 | 1.18047842 | 0.58886046 |
| Q8NI08 | NCOA7   | ECLSLDPEER                      | S441        | 0.03923824 | 2.07834002 | 0.43108921 |
| O75376 | NCOR1   | HEAPSSPISGQPCGDDQNASPSK         | S172        | 0.14261284 | 1.37585003 | 0.5281867  |
| O75376 | NCOR1   | HEAPSSPISGQPCGDDQNASPSK         | S157        | 0.17403858 | 1.22124863 | 0.54778823 |
| O75376 | NCOR1   | YETPSDAIEVISPASSPAPPQEK         | S1977       | 0.73600266 | 0.93626958 | 0.87923537 |
| O75376 | NCOR1   | MPIEDSSPEK                      | S1196       | 0.78715408 | 0.95557951 | 0.90720825 |
| O75376 | NCOR1   | VSPENLVDK                       | S2120       | 0.80755985 | 1.03060166 | 0.91602956 |
| O75376 | NCOR1   | HEAPSSPISGQPCGDDQNASPSK         | S158,S172   | 0.86300196 | 1.01425662 | 0.94087338 |
| O75376 | NCOR1   | QQQLEEEAAKPEPEKVPSPPPVEQK       | S224        | 0.92369606 | 1.01846722 | 0.96716763 |
| O75376 | NCOR1   | AQLSPGIYDTSAR                   | S1472       | 0.96030208 | 1.00521921 | 0.98250904 |
| Q9Y618 | NCOR2   | SPAPGLASGDRPPSVSSVHSEGCNR       | S2424       | 0.1606704  | 0.71463775 | 0.54196083 |

|        |          |                                 |           |            |            |            |
|--------|----------|---------------------------------|-----------|------------|------------|------------|
| Q9Y618 | NCOR2    | SPGNSTQPPAFFSK                  | S2269     | 0.99003778 | 1.00237449 | 0.99497255 |
| Q9BTX1 | NDC1     | KLNSPEETAFAQTPK                 | S406      | 0.43734095 | 1.23236466 | 0.71982749 |
| Q9BTX1 | NDC1     | LNSPEETAFAQTPK                  | S406      | 0.61780361 | 0.94080605 | 0.81837121 |
| O14777 | NDC80    | NSQLGIFSSSEK                    | S77       | 0.19297442 | 1.22755125 | 0.5651429  |
| Q96MG7 | NDNL2    | PGGSGQSGPSPQGAR                 | S64       | 0.04308915 | 1.35448005 | 0.44128756 |
| Q92597 | NDRG1    | TASGSSVTSLDGTR                  | S330      | 0.10377317 | 0.64435146 | 0.50572948 |
| Q9UGV2 | NDRG3    | THSTSSSLGSGESPFSR               | T332      | 0.00640836 | 0.62890584 | 0.31708848 |
| Q9UGV2 | NDRG3    | THSTSSSLGSGESPFSR               | S331      | 0.07312498 | 0.63723938 | 0.46713103 |
| Q8NHV4 | NEDD1    | LVTSGAESGNLNTSPSSNQTR           | S516      | 0.58174178 | 1.31152094 | 0.80001994 |
| P46934 | NEDD4    | RQSEETESVDNR                    | S670      | 0.38385425 | 1.22399318 | 0.67941113 |
| Q96PY6 | NEK1     | TCSLPDLK                        | S1052     | 0.90335808 | 0.98746867 | 0.95894477 |
| P51957 | NEK4     | RLSSDCSVTQER                    | S661      | 0.91798993 | 1.01327434 | 0.96556856 |
| Q8TD19 | NEK9     | VASEAPLEHKPQVEASSPR             | S869      | 0.26373158 | 1.24245239 | 0.60212177 |
| Q9H3P2 | NELFA    | EASRPPPEPSAPSTLPAQFK            | S363      | 0.92702829 | 1.01994328 | 0.96756561 |
| P18615 | NELFE    | SISADDDLQESSR                   | S115      | 0.28580362 | 1.07298985 | 0.61962532 |
| P18615 | NELFE    | SDSFPER                         | S251      | 0.469481   | 1.16234227 | 0.73272652 |
| P18615 | NELFE    | SLYESFVSSDR                     | S131      | 0.55760143 | 0.9458571  | 0.78304897 |
| P18615 | NELFE    | SLSEQPVMDDTATATEQAK             | S49       | 0.67572071 | 1.06593407 | 0.85001908 |
| P18615 | NELFE    | SLSEQPVMDDTATATEQAK             | S51       | 0.71078632 | 0.91484716 | 0.86790184 |
| O60524 | NEMF     | KLPSDSGDLEALEGK                 | S831      | 0.11235662 | 0.84075908 | 0.51002233 |
| O60524 | NEMF     | KLPSDSGDLEALEGK                 | S833      | 0.44162244 | 0.87890721 | 0.72100919 |
| P48681 | NES      | DGESDGFADDEESGEEGEDQEEGREGPAGR  | S1418     | 0.08932228 | 1.62761743 | 0.4960359  |
| P48681 | NES      | ENQEPLRSPEVGDDEALRPLTK          | S680      | 0.13631253 | 0.67699673 | 0.52288253 |
| P48681 | NES      | EGWDPVAVLASEGLEAPPSEK           | S1347     | 0.2817343  | 0.43973506 | 0.61660437 |
| P48681 | NES      | SLGEQDQMTLRPPEK                 | S768      | 0.47318356 | 1.10722376 | 0.73565792 |
| P48681 | NES      | QEAATGQSPEDHASLAPPLSPDHSSLEAK   | S475      | 0.75877044 | 1.04871238 | 0.88966056 |
| P48681 | NES      | QEAATGQSPEDHASLAPPLSPDHSSLEAK   | S471      | 0.87264152 | 1.02279369 | 0.94378338 |
| Q72628 | NET1     | RASGLSTEGATGPSADTSGSELDGR       | S21       | 0.98513245 | 0.99640596 | 0.99242732 |
| Q0ZGT2 | NEXN     | EMLASDDEEDVSSK                  | S80       | 0.01672402 | 1.28345802 | 0.36631449 |
| Q0ZGT2 | NEXN     | TISQEFLLTPGK                    | S365      | 0.86666389 | 1.02206528 | 0.94208744 |
| P21359 | NF1      | SFDHLISDTK                      | S2543     | 0.08294763 | 1.34440344 | 0.49288727 |
| P21359 | NF1      | SMSLDMGQPSQANTK                 | S2523     | 0.19680361 | 1.2712006  | 0.56846559 |
| P21359 | NF1      | GSEGYLAATYPTVGQTSR              | S2515     | 0.9625668  | 1.01319611 | 0.98250904 |
| P35240 | NF2      | MSFSSLK                         | S13       | 0.26962581 | 1.20045641 | 0.60403212 |
| Q8NCF5 | NFATC2IP | GAADVEVEPEPPPGPVASR             | S84       | 0.49850096 | 1.06384957 | 0.75042655 |
| Q12968 | NFATC3   | KTSEDQAAILPGK                   | S344      | 0.07229195 | 0.73543929 | 0.46528233 |
| Q12857 | NFIA     | SVEDEMDSPGEEPFYTGQGR            | S280      | 0.86516718 | 1.04574657 | 0.94208744 |
| Q12857 | NFIA     | SPGSGSQSSGWHEVEPGMPSPTTLK       | T322,S300 | 0.98865656 | 1.00425953 | 0.99451389 |
| P08651 | NFIC     | SPFNPSPOQDSR                    | S333      | 0.32059306 | 0.77620397 | 0.64118612 |
| P08651 | NFIC     | NWTEDEMEGGISSPVK                | S323      | 0.39535331 | 0.90566038 | 0.69240487 |
| P08651 | NFIC     | SPFNPSPOQDSR                    | S339      | 0.57015219 | 1.0625     | 0.7913512  |
| Q16649 | NFIL3    | LSSPIDMTSK                      | S353      | 0.28742874 | 1.14523202 | 0.62064599 |
| Q16649 | NFIL3    | GPIHSPVELK                      | S301      | 0.59676473 | 1.07347876 | 0.8075237  |
| P23511 | NFYA     | DSPHMQDPNQADEEAMTQIIR           | S326      | 0.36835737 | 0.66351176 | 0.67368198 |
| P23511 | NFYA     | EKDSPHMQDPNQADEEAMTQIIR         | S326      | 0.74127897 | 0.87915347 | 0.88204647 |
| Q8NEI9 | NGDN     | EQYSDAPEEIR                     | S214      | 0.7397517  | 1.05842675 | 0.88092337 |
| Q6T4R5 | NHS      | APSAGLEEVAQPEVDVITSQSDSPTR      | S1329     | 0.34955582 | 0.53588095 | 0.6652903  |
| Q6T4R5 | NHS      | ATTPSLPSVDNEFK                  | T997      | 0.61821781 | 0.91731998 | 0.81837121 |
| Q6T4R5 | NHS      | VQQEIDSESPVAR                   | S415      | 0.78769074 | 0.96778753 | 0.90720825 |
| Q9BYG3 | NIFK     | VSGLTLDTPKE                     | T223      | 0.03230669 | 0.73670886 | 0.40879194 |
| Q9BYG3 | NIFK     | SQVAELNDDDK                     | S247      | 0.25980213 | 0.78344934 | 0.59994392 |
| Q9BYG3 | NIFK     | SQVAELNDDDKDDEIVFK              | S247      | 0.6665461  | 0.92993631 | 0.84491876 |
| Q6K79  | NIPBL    | NNTAAETEDDESDDGDRGGTSGSLR       | S2672     | 0.02190208 | 1.79366383 | 0.37964331 |
| Q6K79  | NIPBL    | SPQPVCSPAGSEGTPK                | S280      | 0.32139605 | 1.14267267 | 0.64145984 |
| Q6K79  | NIPBL    | AITSLGGGSPK                     | S2658     | 0.37165368 | 1.59962767 | 0.67470723 |
| Q6K79  | NIPBL    | DVPPDILLDSPERK                  | S318      | 0.40693571 | 0.84160422 | 0.69976652 |
| Q6K79  | NIPBL    | AAMYDIHSSPK                     | S350      | 0.66726138 | 0.94977398 | 0.8454773  |
| Q6K79  | NIPBL    | NNTAAETEDDESDDGDR               | S2672     | 0.78137907 | 0.90930465 | 0.90493462 |
| Q8N5F7 | NKAP     | IGELGAPEWGLSPK                  | S149      | 0.54180515 | 1.10626157 | 0.77202382 |
| P30414 | NKTR     | VEETSPNGAR                      | S1146     | 0.15478641 | 1.14049587 | 0.53741649 |
| P30414 | NKTR     | HDTVTVSSDLQFTK                  | S1076     | 0.90489613 | 1.01798677 | 0.95963537 |
| P30414 | NKTR     | ILIPSDIESSK                     | S463      | 0.93288838 | 1.00951847 | 0.97049271 |
| P43699 | NKX2-1   | AAQQQLQQDSGGGGGGTGCPCQQQAQQQSPR | S254      | 0.55828042 | 1.12777285 | 0.78304897 |
| Q86W24 | NLRP14   | SLCEALK                         | S748      | 0.63400158 | 1.05249169 | 0.82701539 |
| Q96D46 | NMD3     | DSAIPIVSDTDDEGAPR               | S468      | 0.04061653 | 1.23550296 | 0.43387065 |
| Q96D46 | NMD3     | DSAIPIVSDTDDEGAPR               | T470      | 0.04198781 | 1.32219366 | 0.43978141 |
| P15531 | NME1     | NIHIGSDSVESAIEK                 | S120      | 0.06393011 | 1.51328512 | 0.46076126 |
| O60361 | NME2P1   | NIHIGSDSVK                      | S105      | 0.00347911 | 3.30752804 | 0.29204389 |
| Q9HAN9 | NMNAT1   | LEASDCDHQQNSPTLERPGR            | S117      | 0.10602974 | 1.15119363 | 0.50572948 |
| P30419 | NMT1     | GGSPANDTGAK                     | S47       | 0.92030941 | 0.98974247 | 0.96635781 |
| Q9ULX3 | NOB1     | GEDVPSEEEEEENGFEEDR             | S184      | 0.11945697 | 0.78568794 | 0.51002233 |
| Q9ULX3 | NOB1     | KDSDDDGGGWITPSNIK               | S201      | 0.22960446 | 0.65553789 | 0.58267075 |
| Q9ULX3 | NOB1     | DDSDDDGGGWITPSNIK               | S201      | 0.26469028 | 0.68890691 | 0.60298408 |
| Q76FK4 | NOL8     | VSHDSDDDIMR                     | S365      | 0.07103962 | 1.16990788 | 0.46528233 |
| Q5JPE7 | NOMO2    | LQGVGALGQAASDNSGPEDAK           | S1205     | 0.05727122 | 1.73887737 | 0.45298462 |
| P78316 | NOP14    | MNVEEDVQEQSK                    | S349      | 0.10598865 | 1.22160387 | 0.50572948 |
| P78316 | NOP14    | FGEYNSNMSPEEK                   | S96       | 0.17365293 | 0.85941947 | 0.54778823 |
| P78316 | NOP14    | RFGYNSNMSPEEK                   | S96       | 0.31735002 | 1.18       | 0.63865949 |
| P46087 | NOP2     | GTDQTTPAVLSPSK                  | S732      | 0.22078412 | 0.87815853 | 0.58267075 |
| O00567 | NOP56    | EEPVSSGPEEAVGK                  | S570      | 0.14841489 | 1.19036954 | 0.53335371 |
| O00567 | NOP56    | EELMSSDLEETAGSTSPK              | S519      | 0.60500152 | 0.8363223  | 0.81202192 |

|        |         |                                    |           |            |            |            |
|--------|---------|------------------------------------|-----------|------------|------------|------------|
| O00567 | NOP56   | EELMSSDLEETAGSTSIPK                | S520      | 0.62897881 | 0.89761775 | 0.82322298 |
| Q9Y2X3 | NOP58   | EEPLSEEEPTSTAIASPEK                | S502      | 0.00068833 | 2.45888889 | 0.21503578 |
| Q9Y2X3 | NOP58   | EEPLSEEEPTSTAIASPEK                | S502,S514 | 0.18435104 | 0.85502165 | 0.55849825 |
| Q9Y2X3 | NOP58   | EEPLSEEEPTSTAIASPEKK               | S502,S514 | 0.48301929 | 1.14119601 | 0.74130364 |
| Q9Y2X3 | NOP58   | EEPLSEEEPTSTAIASPEK                | S514      | 0.59739056 | 1.05789474 | 0.8075237  |
| O75052 | NOS1AP  | VSHQPQMLTASPR                      | S266      | 0.92154662 | 1.01883563 | 0.9667998  |
| Q04721 | NOTCH2  | AEDEALLSEEDDPIDR                   | S1778     | 0.02899682 | 1.24566929 | 0.40710444 |
| Q14207 | NPAT    | AHASLMSPGR                         | S207      | 0.28633772 | 0.83457866 | 0.61994998 |
| P06748 | NPM1    | LLSISGK                            | S137      | 0.55619296 | 1.123297   | 0.78182069 |
| P10588 | NR2F6   | AAEDDSASPPGAASDAEPGDEERPLQVDCVCGDK | S40       | 0.33143508 | 0.76877882 | 0.6527531  |
| Q9UHY1 | NRPB1   | TPTPEPAEVETR                       | T433      | 0.63287459 | 0.9477208  | 0.82591157 |
| O43847 | NRD1    | RGSLSNAGDPEIVK                     | S94       | 0.11985623 | 1.19221106 | 0.51002233 |
| O43847 | NRD1    | RGSLSNAGDPEIVK                     | S96       | 0.72325029 | 1.05229111 | 0.87410666 |
| P48552 | NRIP1   | SEPVSQDFFSK                        | S807      | 0.0046024  | 0.63742935 | 0.29204389 |
| Q96L73 | NSD1    | AASPHQVTPQADEK                     | S2471     | 0.37469877 | 1.0958382  | 0.67596613 |
| Q08J23 | NSUN2   | ESTQLSPADLTEGKPTDPSK               | S456      | 0.01267243 | 1.17746114 | 0.36501133 |
| Q08J23 | NSUN2   | AGEPNSPDAEEANSPDVTAGCDPAGVHPPR     | S751      | 0.04381072 | 1.43606685 | 0.44293212 |
| Q08J23 | NSUN2   | AGEPNSPDAEEANSPDVTAGCDPAGVHPPR     | S743      | 0.21946142 | 1.15003159 | 0.58267075 |
| Q08J23 | NSUN2   | AGEPNSPDAEEANSPDVTAGCDPAGVHPPR     | S743,S751 | 0.76733292 | 0.95724303 | 0.8945081  |
| Q632Y6 | NSUN5P2 | QLEEPGAGTPSPVR                     | S143      | 0.82985883 | 1.02112104 | 0.92538008 |
| Q9H1E3 | NUCKS1  | SGDEGSEDEAPSGED                    | S229      | 0.00330959 | 0.40691075 | 0.29204389 |
| Q9H1E3 | NUCKS1  | TPSPKEEDEEPSPEK                    | T202,S214 | 0.08085494 | 1.6610687  | 0.48773691 |
| Q9H1E3 | NUCKS1  | SGDEGSEDEAPSGED                    | S240      | 0.11625402 | 10.3928457 | 0.51002233 |
| Q9H1E3 | NUCKS1  | EEDEEPSPEK                         | S214      | 0.12807016 | 1.26831897 | 0.5125107  |
| Q9H1E3 | NUCKS1  | EMLMEDVGSSEEEQEEDEEAPFQEK          | S113      | 0.23838205 | 0.20449868 | 0.58659078 |
| Q9H1E3 | NUCKS1  | VVDYSQFQESDDADEDYGR                | S19       | 0.31392762 | 0.36002135 | 0.63653708 |
| Q9H1E3 | NUCKS1  | ATVTPSPVK                          | S181      | 0.44232712 | 0.85091198 | 0.72140914 |
| Q9Y266 | NUDC    | NGSLDSPGKQDTEDEEEDEK               | S139      | 0.10566939 | 2.25964865 | 0.50572948 |
| Q7Z417 | NUFIP2  | GADNDGSGSESGYTTPK                  | S212      | 0.12724311 | 1.17794818 | 0.5125107  |
| Q7Z417 | NUFIP2  | NDSWGSFDLR                         | S652      | 0.19318374 | 1.17868539 | 0.5651429  |
| Q7Z417 | NUFIP2  | NLSSDEATNPISR                      | S112      | 0.21760624 | 1.18978102 | 0.58142167 |
| Q14980 | NUMA1   | VSLEPHQGGPTPEK                     | T2000     | 0.05256785 | 0.63026137 | 0.44612288 |
| Q14980 | NUMA1   | TQPDGTSVPGEPASISQR                 | S1757     | 0.54528784 | 1.07076515 | 0.77425113 |
| Q14980 | NUMA1   | RVSLEPHQGGPTPEK                    | S1991     | 0.84418492 | 1.0456139  | 0.93169366 |
| P49757 | NUMB    | TNPSPTNPFSSDLQK                    | S634      | 0.15277671 | 1.21609794 | 0.53741649 |
| P49790 | NUP153  | SPGFASPK                           | S614      | 0.55809404 | 1.26791497 | 0.78304897 |
| O75694 | NUP155  | AAPQSPSVPK                         | S994      | 0.88142371 | 0.98410472 | 0.94687741 |
| Q8TEM1 | NUP210  | DLAVPAALTPR                        | T1844     | 0.53949586 | 1.09550973 | 0.7718622  |
| P35658 | NUP214  | SPGSTPTTPTSSQAPQK                  | S433      | 0.01134926 | 1.37761295 | 0.36250201 |
| P35658 | NUP214  | SPGSTPTTPTSSQAPQK                  | T437      | 0.46777186 | 1.13038045 | 0.73186198 |
| P35658 | NUP214  | SAQGSSSPVPSMVQK                    | S657      | 0.71343636 | 1.04190062 | 0.86856453 |
| P35658 | NUP214  | SPGSTPTTPTSSQAPQK                  | S430,S441 | 0.81317121 | 0.95557018 | 0.91980727 |
| Q9UUX7 | NUP50   | YLANIEQQHGNSSGRNSESESNK            | S204      | 0.4706519  | 0.81376027 | 0.73358967 |
| Q9UUX7 | NUP50   | YAAETQSPSLFGSTK                    | S221      | 0.74189303 | 0.92248959 | 0.88208167 |
| Q99567 | NUP88   | EDVEVAESPLR                        | S517      | 0.71999476 | 0.95232816 | 0.87405855 |
| P52948 | NUP98   | ADTSQEICSPR                        | S1028     | 0.68225885 | 0.9495096  | 0.85176743 |
| P52948 | NUP98   | YGLQDSDEEEHPSK                     | S888      | 0.73440235 | 0.93545611 | 0.87923537 |
| P52948 | NUP98   | DSENLASPEYEPENGER                  | S623      | 0.9148936  | 0.98796631 | 0.96462519 |
| Q9NX40 | OCIA1   | KLENSPLGEALR                       | S108      | 0.0268766  | 1.52380952 | 0.40703825 |
| Q9NX40 | OCIA1   | LENSPLGEALR                        | S108      | 0.75489409 | 1.03912638 | 0.8884671  |
| Q16625 | OCLN    | YSSGGNFETPSK                       | S370      | 0.86712349 | 0.97453888 | 0.94208744 |
| Q9NZT2 | OGFR    | KVEEESPGDDPDHEASTQGR               | S315      | 0.08881536 | 1.47606383 | 0.4960359  |
| Q9NZT2 | OGFR    | SVEPQDAGPLER                       | S349      | 0.23427127 | 1.17988669 | 0.58536202 |
| Q9NZT2 | OGFR    | SQGDDEAGHGEDRPEPLSPK               | S378      | 0.26278125 | 1.08003088 | 0.60132025 |
| Q9NZT2 | OGFR    | VEEESPGDDPDHEASTQGR                | S315      | 0.95063271 | 0.99059193 | 0.97916383 |
| Q15619 | OR1C1   | NLTVVR                             | T7        | 0.34080194 | 1.26800505 | 0.65997492 |
| Q13415 | ORC1    | SAESPSWTPAEHVAK                    | S199      | 0.01823387 | 0.69268049 | 0.37230658 |
| Q13415 | ORC1    | VAFSEITSPSK                        | S273      | 0.10544508 | 0.74932905 | 0.50572948 |
| P22059 | OSBP    | MLAESDESDEESVSQTDK                 | S193      | 0.01065088 | 1.45945335 | 0.35060945 |
| P22059 | OSBP    | MLAESDESDEESVSQTDK                 | S190      | 0.07720057 | 1.74225569 | 0.48171963 |
| P22059 | OSBP    | SLSELESK                           | S240      | 0.08355183 | 1.22261964 | 0.49347121 |
| P22059 | OSBP    | MLAESDESDEESVSQTDK                 | S190,S193 | 0.53298079 | 0.69264145 | 0.76840363 |
| Q9BXB5 | OSBPL10 | SDNEDKEETELGVMEQQR                 | S380      | 0.9090298  | 1.07487511 | 0.96085522 |
| Q9BXW6 | OSBPL1A | SFEEEGEHLGSR                       | S499      | 0.20024716 | 1.28088943 | 0.56975265 |
| Q9H4L5 | OSBPL3  | QDSWEVVEGLR                        | S34       | 0.18710326 | 0.74676346 | 0.56058734 |
| Q9H4L5 | OSBPL3  | QLMEQDASSPSAQVIGLK                 | S371      | 0.21418448 | 1.91335034 | 0.58063793 |
| Q9H4L5 | OSBPL3  | LHSSNPNLSTLDFGEEK                  | S304      | 0.46578021 | 1.08029338 | 0.73040295 |
| Q9H4L5 | OSBPL3  | ALVHQLSNESR                        | S437      | 0.47855917 | 1.04657534 | 0.73924977 |
| Q9BZF1 | OSBPL8  | ENDQEHDESNDNEVMGK                  | S342      | 0.43865823 | 1.14696593 | 0.71992276 |
| Q01804 | OTUD4   | EESEDENEVSNILR                     | S1023     | 0.01902239 | 1.26585695 | 0.37230658 |
| Q01804 | OTUD4   | ESNYFGLSPEER                       | S442      | 0.53070635 | 0.94497078 | 0.76679083 |
| Q8N573 | OXR1    | VVSSTSEEEAFTEK                     | S204      | 0.49342724 | 0.97108283 | 0.74837624 |
| Q8N573 | OXR1    | VVSSTSEEEAFTEK                     | S202      | 0.54095786 | 1.05480632 | 0.7718622  |
| Q9NWX8 | PAG1    | ENDYESISDLQQR                      | Y417      | 0.09587251 | 0.47352618 | 0.5018786  |
| Q9NWX8 | PAG1    | EGGEAEESATDTTSETNK                 | S288      | 0.47522243 | 1.10552374 | 0.73669753 |
| Q96GU1 | PAGE5   | SQSSERGNQDESSQVGPVIVQVQPTTEK       | S31       | 0.25367616 | 1.25631579 | 0.59603736 |
| Q96GU1 | PAGE5   | GNDQESSQVGPVIVQVQPTTEK             | S40       | 0.66605716 | 1.11020934 | 0.84491876 |
| Q9BTK6 | PAGR1   | DLFSLDSEDPSPAPPLR                  | S237      | 0.31023915 | 0.87045784 | 0.63653708 |
| P22234 | PAICS   | EVYELLDSPGK                        | S27       | 0.62209061 | 0.86153315 | 0.82113924 |
| Q13153 | PAK1    | DVATSPISPTEENNTTPDALTR             | T225,T229 | 0.07916101 | 0.78185362 | 0.48550079 |
| Q13153 | PAK1    | DVATSPISPTEENNTTPDALTR             | T230      | 0.36397318 | 1.17791612 | 0.67249569 |

|        |         |                                     |             |            |            |            |
|--------|---------|-------------------------------------|-------------|------------|------------|------------|
| Q13153 | PAK1    | DVATSPISPTENNTTPPDALTR              | S223        | 0.47423245 | 1.21599701 | 0.73608495 |
| Q13177 | PAK2    | YLSFTPPEK                           | S141        | 0.00874954 | 0.42216153 | 0.3318662  |
| Q13177 | PAK2    | GTEAPAVVTEEEDDDEETAPPVIAPRPDHTK     | T169        | 0.33640708 | 0.90253304 | 0.65732844 |
| Q8WX93 | PALLD   | SRDSGDENEPIQER                      | S1121       | 0.01964347 | 1.26530612 | 0.37720134 |
| Q8WX93 | PALLD   | IASDEEIQGTK                         | S893        | 0.90549599 | 0.9819197  | 0.95963537 |
| Q9BZ23 | PANK2   | RASSASVAVGASAEGRTR                  | S168        | 0.12114243 | 0.69921325 | 0.51015063 |
| Q9BZ23 | PANK2   | LGSYSGPTSVSR                        | S189        | 0.80440392 | 0.98486056 | 0.91456043 |
| Q9BWT3 | PAPOLG  | RLSDSSCLDSSR                        | S525        | 0.76703933 | 0.95495496 | 0.8945081  |
| Q8TEW0 | PARD3   | FSPDSQYIDNR                         | S383        | 0.09988096 | 0.81910958 | 0.5018786  |
| Q8TEW0 | PARD3   | SMDLGIADETK                         | S852        | 0.23103518 | 1.19609756 | 0.58402227 |
| Q9BYG5 | PARD6B  | HGAGSGCLGTMEVK                      | S11         | 0.0332709  | 1.30828815 | 0.41440901 |
| Q86W56 | PARG    | QESCLGNPPFEK                        | S286        | 0.76033016 | 0.94941807 | 0.88975212 |
| O95453 | PARN    | ELSPAGSISK                          | S619        | 0.05076867 | 1.36314572 | 0.44612288 |
| O95453 | PARN    | NNSFTAPSTVGK                        | S557        | 0.42270695 | 0.87849422 | 0.71209015 |
| Q53GL7 | PARP10  | AGPVSPGCVK                          | S431        | 0.61782451 | 0.88435468 | 0.81837121 |
| Q86TB9 | PATL1   | STSPHIGSPVVR                        | S179        | 0.66795811 | 1.08227311 | 0.84569578 |
| Q96KB5 | PBK     | GLSHSPWAVK                          | S59         | 0.16251357 | 0.54360984 | 0.54196083 |
| Q08174 | PCDH1   | SNSPLPSIQLQPQSPSASK                 | S973,S984   | 0.81270798 | 0.9301554  | 0.91960573 |
| O60245 | PCDH7   | LSDSPSMGR                           | S974        | 0.10375467 | 0.62563821 | 0.50572948 |
| Q9H4Z3 | PCIF1   | EEASLLSHSPGTNSQSPCKPIR              | S30,S14     | 0.23886684 | 1.46595634 | 0.58659409 |
| Q9H4Z3 | PCIF1   | QLSEEQPSGNGVK                       | S116        | 0.42359072 | 1.11283495 | 0.71283447 |
| Q15154 | PCM1    | YMSQMSVPEQAELEK                     | S93         | 0.04053356 | 0.58425212 | 0.43387065 |
| Q15154 | PCM1    | RVTNDISPESPGVGR                     | S65         | 0.12959525 | 2.17286078 | 0.5125107  |
| Q15154 | PCM1    | WVSELSVVEEK                         | S991        | 0.18002461 | 0.67395824 | 0.55295852 |
| Q15154 | PCM1    | KFGVESDK                            | S56         | 0.51281413 | 1.07512469 | 0.75817525 |
| Q15154 | PCM1    | ILEDHGSAPAGEIDDEDK                  | S1730       | 0.59720075 | 0.90228873 | 0.8075237  |
| Q8WW12 | PCNP    | DTPTSAGPNSFNK                       | S147        | 0.11346771 | 1.49381396 | 0.51002233 |
| P49585 | PCYT1A  | TSPPCSPANLSR                        | T342,S347   | 0.3065913  | 1.2282181  | 0.63401508 |
| P49585 | PCYT1A  | AAAYDISEDEED                        | S362        | 0.62112031 | 0.84841795 | 0.82052994 |
| Q9Y5K3 | PCYT1B  | MLQALSPK                            | S315        | 0.04117808 | 1.42976939 | 0.43680889 |
| Q53EL6 | PDCD4   | SGLTVTPSPK                          | T93         | 0.01666407 | 2.04421688 | 0.36631449 |
| O14737 | PDCD5   | VMSDEDDDDY                          | S119        | 0.41602358 | 0.81541451 | 0.70812712 |
| O76074 | PDE5A   | GHTESCSCPLQQSPR                     | S86         | 0.05029234 | 0.79186052 | 0.44612288 |
| O60658 | PDE8A   | RLSGNEVVLSTK                        | S457        | 0.11455992 | 1.21092649 | 0.51002233 |
| P08559 | PDHA1   | YHGHSMSDPGVSYR                      | S293,S300   | 0.0530283  | 0.3192745  | 0.44612288 |
| P08559 | PDHA1   | YGMGTSVER                           | S232        | 0.40304571 | 1.10395656 | 0.69829509 |
| P08559 | PDHA1   | YHGHSMSDPGVSYR                      | S295        | 0.40678331 | 0.7161017  | 0.69976652 |
| P08559 | PDHA1   | YHGHSMSDPGVSYR                      | S293        | 0.46231657 | 0.94291755 | 0.72895075 |
| P08559 | PDHA1   | YHGHSMSDPGVSYR                      | Y289        | 0.77423569 | 0.92885109 | 0.89974219 |
| O00151 | PDLM1   | VWSPLVTEEGK                         | S90         | 0.70302156 | 0.92427185 | 0.86398002 |
| Q96JY6 | PDLM2   | SQATSPGQTNGDSSLEVLATR               | S87         | 0.6696437  | 0.94187026 | 0.84650101 |
| P50479 | PDLM4   | IHIDPEIQDGSPTTSR                    | S112        | 0.05590943 | 0.76937046 | 0.45298462 |
| Q29RF7 | PD55A   | AAVGQESPPGLEAGNAK                   | S1305       | 0.48561261 | 1.08020638 | 0.74248003 |
| Q29RF7 | PD55A   | EQSSAAETGVSENEPNVR                  | S1195       | 0.9327074  | 1.01615227 | 0.97049271 |
| Q9NTI5 | PD55B   | METVSNASSSNPSSPGR                   | S1162,S1165 | 0.020781   | 1.67208877 | 0.37949754 |
| Q9NTI5 | PD55B   | AESPESIAESTQSTPQK                   | S1358       | 0.0215276  | 1.50548005 | 0.37949754 |
| Q9NTI5 | PD55B   | METVSNASSSNPSSPGR                   | S1166       | 0.0528979  | 1.17999603 | 0.44612288 |
| Q9NTI5 | PD55B   | GHTASESEQQWPEEK                     | S1257       | 0.07865657 | 0.72507331 | 0.48479487 |
| Q9NTI5 | PD55B   | RGHTASESEQQWPEEK                    | S1257       | 0.22475276 | 1.20437406 | 0.58267075 |
| Q9NTI5 | PD55B   | AESPESIAESTQSTPQK                   | T1370,S1358 | 0.24529543 | 0.83643032 | 0.58971922 |
| Q9NTI5 | PD55B   | GRLDSSSEMDHSENEYDTMSSPLPGK          | S1176,S1182 | 0.26829547 | 0.39239319 | 0.60403212 |
| Q9NTI5 | PD55B   | EDILENEDEQNSPPKK                    | S1283       | 0.3408302  | 1.08339342 | 0.65997492 |
| Q9NTI5 | PD55B   | EDILENEDEQNSPPK                     | S1283       | 0.92313437 | 0.98728134 | 0.96716763 |
| Q6P996 | PDXDC1  | GSDALSETSSVSHIEDLEK                 | S718        | 0.10393753 | 0.17788634 | 0.50572948 |
| Q15121 | PEA15   | QPSEEEIHK                           | S116        | 0.49740873 | 1.15592996 | 0.74981346 |
| P30086 | PEBP1   | NRPTSISWDGLDLSGK                    | S52         | 0.86000249 | 1.0166205  | 0.93886034 |
| Q8IZL8 | PELP1   | GSPDGLQGTGKPSAPK                    | S481        | 0.20521345 | 1.44578313 | 0.57194083 |
| Q8IZL8 | PELP1   | AGSNEDPILAPSGTTPPTIPDETFFGGR        | T745        | 0.29917758 | 1.21148072 | 0.62631205 |
| Q8IZL8 | PELP1   | EGESPAAGPPPQELVEEESAPPTLLEEETEDGSDK | S1043       | 0.41661715 | 0.5351315  | 0.70812712 |
| O43933 | PEX1    | SQSGEDESMMNQPGPIK                   | S1211       | 0.39282129 | 0.91856954 | 0.68946762 |
| P40855 | PEX19   | NATDLQNSMSEELTK                     | S147        | 0.30755299 | 0.71919068 | 0.63518947 |
| Q9NQP4 | PFDN4   | FGSNINLEADES                        | S125        | 0.97532595 | 1.0036905  | 0.98795929 |
| Q16875 | PFKF3   | RNSVTPLASPEPTK                      | S461,S467   | 0.05326801 | 0.23710804 | 0.44612288 |
| Q01813 | PFKP    | SFAGNLNTYK                          | S386        | 0.21378749 | 0.89575758 | 0.58004915 |
| O00264 | PGRMC1  | EGEETPVYSDEEPPKDESAR                | S181        | 0.06249098 | 1.83004985 | 0.45817252 |
| O00264 | PGRMC1  | GDQPAASGDSDDEPPPLPR                 | S57         | 0.06675972 | 1.34245096 | 0.46315453 |
| O00264 | PGRMC1  | EGEETPVYSDEEPEK                     | S181        | 0.67528843 | 1.05319645 | 0.84997288 |
| O15173 | PGRMC2  | DFSLEQLR                            | S104        | 0.00356658 | 6.05778912 | 0.29204389 |
| O15173 | PGRMC2  | LLKPGEEPSEYTDDEEDTK                 | T211        | 0.12871455 | 1.17851194 | 0.5125107  |
| O15173 | PGRMC2  | GLGAGAGAGEESPATSLPR                 | S90         | 0.38882688 | 1.14409575 | 0.68506582 |
| O15173 | PGRMC2  | LLKPGEEPSEYTDDEEDTK                 | S208        | 0.61232968 | 1.05179961 | 0.81560563 |
| Q8IZ21 | PHACTR4 | SSSPVQVEEPPVR                       | S118        | 0.45354578 | 1.07393365 | 0.72537341 |
| Q8IXK0 | PHC2    | LPQQDHTTTTDSMEEPYLQESK              | T619        | 0.37755141 | 0.92107584 | 0.67666227 |
| Q92613 | PHF16   | NSSTETDQQPHSPDSSSVHSIR              | S566        | 0.30091869 | 1.12963989 | 0.62791959 |
| O75151 | PHF2    | EPPSPIEATPPQSLLK                    | S474        | 0.3754314  | 1.18836887 | 0.67596613 |
| O75151 | PHF2    | AVRPEVNTVASSDEVCDGDREK              | S458        | 0.63004079 | 0.86954151 | 0.82390229 |
| Q92576 | PHF3    | RQLQEDQENNLQDNQTSNSSPCR             | S1614       | 0.14143037 | 1.20592593 | 0.52770768 |
| Q92576 | PHF3    | MAPPVDDLSPKK                        | S1133       | 0.44716592 | 1.17209673 | 0.72351031 |
| Q92576 | PHF3    | MAPPVDDLSPK                         | S1133       | 0.79330382 | 0.97594502 | 0.91095934 |
| Q8IWS0 | PHF6    | TAHNSEADLEESFNEHELEPSSPK            | S138,S155   | 0.23878047 | 0.40185187 | 0.58659409 |
| Q8WWQ0 | PHIP    | TAFYNEDDSEEEQR                      | S1783       | 0.3221349  | 0.71050521 | 0.64145984 |

|        |         |                            |             |            |            |            |
|--------|---------|----------------------------|-------------|------------|------------|------------|
| Q8WWQ0 | PHIP    | AQSYDIQAWK                 | S1315       | 0.826072   | 0.95080984 | 0.92458845 |
| P46019 | PHKA2   | SLNLVDSPQLLEK              | S729        | 0.22121474 | 1.4126882  | 0.58267075 |
| Q93100 | PHKB    | QSSTPSAPELGQQPDVNISEWK     | T702        | 0.19382977 | 0.6690229  | 0.56542437 |
| Q86UU1 | PHLDB1  | TRSPSPTLGLSAPHK            | S518,S520   | 0.17404927 | 0.80413437 | 0.54778823 |
| Q86UU1 | PHLDB1  | LWESMER                    | S678        | 0.52156407 | 0.80512499 | 0.76237684 |
| Q86UU1 | PHLDB1  | TFSOGLATR                  | S430        | 0.70719359 | 1.0644493  | 0.86558861 |
| Q86UU1 | PHLDB1  | TLQPPEPR                   | S443        | 0.89270157 | 1.03046747 | 0.95233309 |
| Q86SQ0 | PHLDB2  | LSTGTTVEDVQK               | S468        | 0.09856515 | 0.75854926 | 0.5018786  |
| Q86SQ0 | PHLDB2  | SGAAMPSSPK                 | S204        | 0.12726805 | 1.36460852 | 0.5125107  |
| Q86SQ0 | PHLDB2  | SSISSISGR                  | S414        | 0.54611178 | 0.89154397 | 0.77473905 |
| Q86SQ0 | PHLDB2  | SHDNVYSLGGLEGR             | Y162        | 0.86791192 | 1.03850746 | 0.94208744 |
| Q9P1Y6 | PHRF1   | LPALGEAHVSEVATADK          | S1229       | 0.09172249 | 1.2389145  | 0.49933922 |
| Q9P1Y6 | PHRF1   | ECSPTSSLER                 | S1124       | 0.51433505 | 0.95250425 | 0.75868535 |
| Q9P1Y6 | PHRF1   | EASPAPLAQGEPEGREDLPT       | S1202       | 0.67086518 | 1.05354986 | 0.84671795 |
| Q9BTU6 | PI4K2A  | VAAAAGSGSPGPGSPGHDR        | S47,S51     | 0.01691905 | 1.2636695  | 0.36631449 |
| Q9BTU6 | PI4K2A  | VAAAAGSGSPGPGSPGHDR        | S47         | 0.11853105 | 1.3434526  | 0.51002233 |
| Q8TCG2 | PI4K2B  | LASADGGSPPEEEDGEREPLLR     | S17         | 0.09565406 | 1.29199771 | 0.5018786  |
| Q9UBF8 | PI4KB   | SVENLPECGITHEQR            | S428        | 0.58259225 | 1.03199269 | 0.80010327 |
| Q92508 | PIEZO1  | TASELLDR                   | S1646       | 0.06567862 | 0.81598281 | 0.46184181 |
| Q92508 | PIEZO1  | SGSEEAIVDPGER              | S1621       | 0.95373448 | 1.0088645  | 0.98079293 |
| O00443 | PIK3C2A | VSNLQVSPK                  | S259        | 0.06099488 | 0.81263309 | 0.45713107 |
| Q9Y2I7 | PIKFYVE | SASITNLSLDR                | S307        | 0.27441434 | 0.80878975 | 0.60717337 |
| Q9UKF7 | PITPNC1 | SAPETLTPDPEK               | S299        | 0.11104028 | 1.16206773 | 0.51002233 |
| Q9BZ71 | PITPNM3 | KGSISSTQDTPVAVEEDCSLASSK   | S297        | 0.09871939 | 0.77651839 | 0.5018786  |
| Q9BZ71 | PITPNM3 | SNIDISSGLEDEEPK            | S321        | 0.15742672 | 1.2120098  | 0.53741649 |
| P14618 | PKM     | LDIDSPITAR                 | S37         | 0.72576973 | 1.05090422 | 0.87523758 |
| Q16512 | PKN1    | LNLGTDSDSSPQK              | S562        | 0.46000562 | 0.90585534 | 0.72775395 |
| Q16513 | PKN2    | ASSLGEIDESSLER             | S583        | 0.11929497 | 1.12222926 | 0.51002233 |
| Q99959 | PKP2    | RLEISPDSSPER               | S151        | 0.00385023 | 1.33781965 | 0.29204389 |
| Q99959 | PKP2    | LEISPDSSPER                | S151        | 0.06944241 | 1.32304441 | 0.4637455  |
| Q99959 | PKP2    | SMGNLLEK                   | S251        | 0.32996691 | 1.14449339 | 0.65025856 |
| Q99959 | PKP2    | RLEISPDSSPER               | S151,S155   | 0.82965848 | 1.02297136 | 0.92538008 |
| Q9Y446 | PKP3    | ADYDTLSLR                  | S180        | 0.01411049 | 0.57530529 | 0.36631449 |
| Q9Y446 | PKP3    | SAVDLCSR                   | S123        | 0.10613108 | 0.64890405 | 0.50572948 |
| Q9Y446 | PKP3    | LSSGFDDIDLPSAVK            | S314        | 0.78231831 | 1.05873776 | 0.90515203 |
| Q9Y446 | PKP3    | AGGLDWPEATEVSPSR           | S238        | 0.95520642 | 0.98965018 | 0.98168076 |
| Q99569 | PKP4    | SAVSPDLHITPIYEGR           | S406        | 0.09426655 | 0.50297487 | 0.5018786  |
| Q99569 | PKP4    | VASPSQGVGSSSPK             | S337        | 0.29408965 | 1.24618454 | 0.62281368 |
| Q99569 | PKP4    | VGSPLTLTDAQTR              | S314        | 0.33753006 | 0.86042539 | 0.65781985 |
| P47712 | PLA2G4A | HIVSNDSDSDDESHEPK          | S437        | 0.89868775 | 1.01656627 | 0.95652424 |
| Q01970 | PLC3    | SLGDEGLNR                  | S537        | 0.6086259  | 1.14513238 | 0.81409847 |
| Q15149 | PLEC    | SDEGQLSPATR                | S720        | 0.03219495 | 1.38799225 | 0.40879194 |
| Q15149 | PLEC    | SLQEEHVAVQALR              | S1732       | 0.04937204 | 1.57894737 | 0.44612288 |
| Q15149 | PLEC    | QITMEEVLR                  | T4030       | 0.11108227 | 0.21658321 | 0.51002233 |
| Q15149 | PLEC    | ELEEVSPEPVPVATTQR          | S149        | 0.17027468 | 1.32462901 | 0.54531589 |
| Q15149 | PLEC    | GYSPYSVSGSGTAGSR           | T4623,S4626 | 0.20757381 | 0.4690158  | 0.57287379 |
| Q15149 | PLEC    | SSVSGSSSYPIPAVSR           | S4384,S4400 | 0.32562997 | 0.7166157  | 0.64655277 |
| Q15149 | PLEC    | SSVSGSSSYPIPAVSR           | S4386,S4389 | 0.34939069 | 0.58365977 | 0.6652903  |
| Q15149 | PLEC    | SWSLATFR                   | S1047       | 0.41895085 | 1.25185278 | 0.709009   |
| Q15149 | PLEC    | AQLEPVASPAK                | S1435       | 0.47554039 | 1.21776504 | 0.73683636 |
| Q15149 | PLEC    | SSVSGSSSYPIPAVSR           | S4386       | 0.74459296 | 0.93333333 | 0.88343394 |
| Q15149 | PLEC    | GYSPYSVSGSGTAGSR           | S4626       | 0.79796556 | 0.92096917 | 0.91349783 |
| Q15149 | PLEC    | SSVSGSSSYPIPAVSR           | S4396       | 0.99385832 | 0.99695611 | 0.99524397 |
| Q9HB21 | PLEKHA1 | SNSLVSTFTMEK               | S332        | 0.32867655 | 1.13820111 | 0.64890487 |
| Q9HB20 | PLEKHA3 | TYSDTDCSDIPLDPDRPVHCSK     | S244        | 0.81468566 | 1.02268908 | 0.91990355 |
| Q9Y2H5 | PLEKHA6 | TKSPTDDEVTPSAVVR           | T775        | 0.41181627 | 1.2179077  | 0.70441107 |
| Q9Y2H5 | PLEKHA6 | SPTDDEVTPSAVVR             | S777        | 0.67870501 | 0.95318254 | 0.85062252 |
| A1L390 | PLEKHG3 | GPLSPFNSR                  | S76         | 0.02346369 | 0.84881044 | 0.39017457 |
| A1L390 | PLEKHG3 | SSSVLSLEGSEK               | S643        | 0.49765629 | 0.96859107 | 0.74981346 |
| A1L390 | PLEKHG3 | IWEGMESSGGSPGK             | S827        | 0.58508961 | 0.86784406 | 0.80108627 |
| A1L390 | PLEKHG3 | AWSSQDEVSTNVR              | S433        | 0.69689071 | 1.07701493 | 0.86070806 |
| A1L390 | PLEKHG3 | DGKSPTVPLQEEAGEPLGGK       | S962        | 0.78561331 | 0.87233799 | 0.90663264 |
| Q494U1 | PLEKHN1 | TASGHEPGGSAVCASR           | S266        | 0.00488633 | 0.57435886 | 0.29204389 |
| Q494U1 | PLEKHN1 | EGSEPWLPLTDGR              | S611        | 0.25400994 | 1.11016144 | 0.59638724 |
| O60664 | PLIN3   | VSGAQEMVSSAK               | S130        | 0.25284981 | 1.43530321 | 0.59589813 |
| P29590 | PML     | SPVIGSEVFLPNSNHVASGAGEAER  | S530        | 0.30784357 | 0.43543984 | 0.63538282 |
| P29590 | PML     | AVSPPHLDGPPSPR             | S518,S527   | 0.48196044 | 1.07411765 | 0.74108884 |
| Q96760 | PNKP    | TPESQDTPPGTPLVLSQDEK       | T118        | 0.1806618  | 1.25914634 | 0.55295852 |
| Q9H307 | PNN     | QESDPEDDDVK                | S100        | 0.28941928 | 1.24253201 | 0.62161558 |
| Q9H307 | PNN     | GFSDSGGGPPAK               | S66         | 0.39006827 | 0.84200849 | 0.68677732 |
| Q9H307 | PNN     | EIAIVHSDAEK                | S347        | 0.41105845 | 1.22004062 | 0.70348782 |
| Q9H307 | PNN     | ENVSALDMEK                 | S450        | 0.82638429 | 0.93879813 | 0.92458845 |
| Q9H307 | PNN     | VESVPESENEASK              | S422        | 0.8759585  | 1.02923911 | 0.94541389 |
| Q9BY77 | POLDIP3 | VNSASSNPPAEVDPDTILK        | S383        | 0.13011576 | 0.59684784 | 0.5125107  |
| Q9NP87 | POLM    | VGSPSGDAASSTPPSTR          | S14         | 0.1095991  | 1.16624048 | 0.51002233 |
| P24928 | POLR2A  | YSPTSPTYSPSPK              | S1920       | 0.248953   | 0.95303959 | 0.59402542 |
| P24928 | POLR2A  | YSPTSPTYSPTPK              | Y1874,S1882 | 0.45524556 | 0.81919166 | 0.72561974 |
| P24928 | POLR2A  | YSPTSPTYSPSPK              | T1915       | 0.59456555 | 0.86069844 | 0.80657235 |
| P24928 | POLR2A  | YSPTSPTYSPSPK              | Y1909,S1920 | 0.94255823 | 0.98930954 | 0.97645885 |
| P24928 | POLR2A  | YSPTSPTYSPTPK              | S1878       | 0.96253677 | 0.99671772 | 0.98250904 |
| Q9NVU0 | POLR3E  | EETVSEEGEEDQEAEEPMDSPLGHSK | S503        | 0.50201597 | 0.73426507 | 0.75168596 |

|        |          |                           |           |            |            |            |
|--------|----------|---------------------------|-----------|------------|------------|------------|
| Q99575 | POP1     | SAVCIADPLTPSQUEK          | S367      | 0.24993047 | 0.86338369 | 0.5945986  |
| Q99575 | POP1     | VQAYEEPSVASSPNGK          | S730      | 0.32568142 | 1.08231259 | 0.64655277 |
| P16435 | POR      | IQTLTSSVR                 | S63       | 0.00283524 | 31.5377586 | 0.29204389 |
| P14859 | POU2F1   | INPPSSGGTSSSPIK           | T445      | 0.64392675 | 0.95758023 | 0.83081654 |
| Q9H2U2 | PPA2     | SLVESVSSSPNK              | S317      | 0.20036138 | 1.10760668 | 0.56975265 |
| Q9NQ55 | PPAN     | VGGSDEEASGIPSR            | S359      | 0.070828   | 1.23490157 | 0.46528233 |
| Q13136 | PPFIA1   | VTSSMSSPSMQPK             | S1174     | 0.20978305 | 0.77069575 | 0.57447755 |
| Q13136 | PPFIA1   | RSSDGLSHEEDLAK            | S239      | 0.69237711 | 1.02784431 | 0.85860808 |
| Q86W92 | PPFIBP1  | SQSTTFNPDDMSEPEFK         | S601      | 0.01214286 | 0.60420017 | 0.36467189 |
| Q8NEY8 | PPHLN1   | DNTFFRESVGR               | S133      | 0.6608021  | 0.95330019 | 0.84225507 |
| Q08752 | PPID     | DGSGDSDHPFEDADIDLK        | S198      | 0.45436355 | 0.85030987 | 0.72561974 |
| Q13427 | PPIG     | RSETPPHWR                 | T358      | 0.43423228 | 1.15088013 | 0.71865424 |
| O15355 | PPM1G    | KLEEVLTSTEGAEENGNSDK      | T528      | 0.03567826 | 1.45108184 | 0.42091393 |
| O15355 | PPM1G    | LEEVLTSTEGAEENGNSDK       | S527      | 0.10371576 | 1.34828981 | 0.50572948 |
| O15355 | PPM1G    | KLEEVLTSTEGAEENGNSDK      | S527      | 0.12514746 | 1.27509267 | 0.5125107  |
| O14974 | PPP1R12A | LASTSDIEEK                | S507      | 0.01920361 | 0.59618602 | 0.37230658 |
| O14974 | PPP1R12A | KSPLIESTANMDNNSQSK        | S299      | 0.29761048 | 1.20629371 | 0.62494294 |
| O14974 | PPP1R12A | SGSYSYLEER                | S910      | 0.30490944 | 0.84184514 | 0.63297159 |
| O14974 | PPP1R12A | SPLIESTANMDNNSQSK         | S299      | 0.38574827 | 1.12755386 | 0.68112967 |
| O14974 | PPP1R12A | RLASTSDIEEK               | S507      | 0.46913012 | 0.8        | 0.73253328 |
| O14974 | PPP1R12A | TGSYGALAEITASK            | S445      | 0.53277899 | 0.90009425 | 0.76840363 |
| Q9BZL4 | PPP1R12C | SPVQLEEAPFSR              | S407      | 0.07436155 | 0.77769411 | 0.47168775 |
| Q9BZL4 | PPP1R12C | SASSSWLEGTSTQAK           | S450      | 0.82936763 | 1.02905569 | 0.92538008 |
| Q96KQ4 | PPP1R13B | EPEQDGAAPADGTVESLPRPLSPTK | T673      | 0.12188309 | 1.20140281 | 0.5105605  |
| Q96A00 | PPP1R14A | QPSPSHDGSLSPLODR          | S134      | 0.09803002 | 1.14171074 | 0.5018786  |
| Q96A00 | PPP1R14A | QPSPSHDGSLSPLODR          | S128,S134 | 0.23281523 | 0.92221847 | 0.58402949 |
| Q96A00 | PPP1R14A | QPSPSHDGSLSPLODR          | S128,S136 | 0.25589424 | 0.91111911 | 0.59776597 |
| Q96A00 | PPP1R14A | QPSPSHDGSLSPLODR          | S128      | 0.53486652 | 1.06527876 | 0.76972936 |
| Q96C90 | PPP1R14B | VYFQSPPGAAGEGPGGADDEGPVR  | S32       | 0.70079688 | 0.91221857 | 0.86274503 |
| Q96C90 | PPP1R14B | VYFQSPPGAAGEGPGGADDEGPVR  | S32       | 0.81568824 | 0.92955373 | 0.92007352 |
| Q6NVC8 | PPP1R18  | LLESPPGVEAGEGEAEK         | S368      | 0.36985358 | 1.13602015 | 0.67368198 |
| Q6NXS1 | PPP1R2P3 | IQEQSSGEEDSDLSPEER        | S122      | 0.02138597 | 1.52836053 | 0.37949754 |
| Q15435 | PPP1R7   | HSSGIVADLSEQLK            | S37       | 0.26941905 | 0.68652143 | 0.60403212 |
| Q15435 | PPP1R7   | GAGQQQSQEMMEVDR           | S12       | 0.93908314 | 0.97414013 | 0.97418985 |
| Q96SB3 | PPP1R9B  | FNGSTEALDK                | S190      | 0.05065937 | 1.588759   | 0.44612288 |
| Q96SB3 | PPP1R9B  | ASSLNENVDSHALLK           | S100      | 0.37539499 | 0.77301359 | 0.67596613 |
| Q14738 | PPP2R5D  | SELPQDVYTIK               | S573      | 0.03965577 | 0.64057606 | 0.43210738 |
| Q9NY27 | PPP4R2   | NHSDSSTSESEVSSVPLK        | S226      | 0.00272729 | 0.80369128 | 0.29204389 |
| Q9NY27 | PPP4R2   | MNGVMFPGNSPSYTER          | S159      | 0.50945018 | 1.24458879 | 0.75632134 |
| O75170 | PPP6R2   | VGTEGLVDSFSQGLER          | S289      | 0.0503503  | 0.50323853 | 0.44612288 |
| Q5H9R7 | PPP6R3   | IQQFDDGGSDDEEDIWEEK       | S617      | 0.15738775 | 0.78643123 | 0.53741649 |
| Q9NQV6 | PRDM10   | SDDGTQDLLHFPTK            | S424      | 0.78899607 | 0.96335886 | 0.90808284 |
| P30041 | PRDX6    | DFTPVCTTELGR              | T44       | 0.94618394 | 0.98430883 | 0.9788835  |
| Q96MT3 | PRICKLE1 | SRSDNALNLVTER             | S681      | 0.15325634 | 0.82620805 | 0.53741649 |
| Q9Y478 | PRKAB1   | CSDVSELSPPGYPHQEPYVCKPEER | S182      | 0.43575141 | 0.67402502 | 0.71904555 |
| P10644 | PRKAR1A  | EDEISPPPPNPVVK            | S83       | 0.33632834 | 0.87177056 | 0.65732844 |
| P10644 | PRKAR1A  | TDSREDEISPPPPNPVVK        | S83       | 0.68026354 | 1.03091625 | 0.85138739 |
| P31321 | PRKAR1B  | SNSQSDSHDEEVSPTPPNPVVK    | T85       | 0.62420448 | 1.0600939  | 0.82174981 |
| P13861 | PRKAR2A  | GDSESEDEDELEVPVPSR        | S80       | 0.03223336 | 1.86140929 | 0.40879194 |
| P13861 | PRKAR2A  | RVSVCAEYNPDEEEDTDPR       | S99       | 0.31328191 | 0.71591617 | 0.63653708 |
| P31323 | PRKAR2B  | RASVCAEAYNPDEEEDDAESR     | S114      | 0.16118681 | 0.72528083 | 0.54196803 |
| Q05655 | PRKCD    | SDSASSEPVGIYQGFKEK        | S302      | 0.06843023 | 0.73071594 | 0.4637455  |
| Q05655 | PRKCD    | SDSASSEPVGIYQGFKEK        | Y313      | 0.10998612 | 0.63618625 | 0.51002233 |
| Q05655 | PRKCD    | TGVAGEDMQDNSGTYGK         | Y334      | 0.25351488 | 0.7488172  | 0.59603736 |
| Q05655 | PRKCD    | RSDSASSEPVGIYQGFKEK       | S304      | 0.60511491 | 1.07095344 | 0.81202192 |
| Q15139 | PRKD1    | TSSAELSTAPDEPLLQK         | S219      | 0.14758822 | 1.16067621 | 0.53170891 |
| Q9BZL6 | PRKD2    | LGTSESLPCTAEELSR          | S214      | 0.06455799 | 0.58784312 | 0.46076126 |
| P78527 | PRKDC    | LTLPEDNSMNVDDQDGPDSDR     | S3205     | 0.27123359 | 1.11129905 | 0.60553604 |
| O75569 | PRKRA    | AEAPPLEREDSGTFLGK         | S18       | 0.42535041 | 1.32614619 | 0.7137923  |
| O75569 | PRKRA    | EDSGTFLGK                 | S18       | 0.97139079 | 0.99723757 | 0.98687477 |
| Q96LA8 | PRMT6    | LESGGGEGGEGTEEDGAER       | T21       | 0.19046299 | 1.18661972 | 0.5651429  |
| Q86WR7 | PROSER2  | SFTLDDESLK                | S43       | 0.02085861 | 0.77321495 | 0.37949754 |
| Q86WR7 | PROSER2  | APSPPVVEHPR               | S179      | 0.44666757 | 1.1651865  | 0.72351031 |
| Q86WR7 | PROSER2  | SRSFTLDDESLK              | S43       | 0.61103871 | 0.93065693 | 0.81488669 |
| O43395 | PRPF3    | GDDDEESDEEAVKK            | S619      | 0.11902029 | 1.54485777 | 0.51002233 |
| O43395 | PRPF3    | GDDDEESDEEAVK             | S619      | 0.90444752 | 1.01194354 | 0.95963537 |
| O75400 | PRPF40A  | QETVADFTPK                | T373      | 0.28882619 | 0.87630662 | 0.62154849 |
| Q13523 | PRPF4B   | DASPINRWSPTR              | S431,S437 | 0.12714741 | 1.46485734 | 0.5125107  |
| Q13523 | PRPF4B   | SINEENGEVSEDQSQNK         | S23       | 0.45384766 | 1.11266294 | 0.72537341 |
| Q13523 | PRPF4B   | EQPEMEDANSEK              | S20       | 0.47698866 | 1.09186906 | 0.73801698 |
| Q13523 | PRPF4B   | SINEENGEVSEDQSQNK         | S32       | 0.54808949 | 1.05644162 | 0.77686147 |
| Q13523 | PRPF4B   | SINEENGEVSEDQSQNK         | S23,S32   | 0.9722278  | 0.99563742 | 0.98687477 |
| Q96HE9 | PRR11    | SPTPTLPLSTSSFDEQN         | S355      | 0.17083818 | 0.66075051 | 0.54531589 |
| Q96HE9 | PRR11    | VDVERSPGGTPLTNK           | S307      | 0.23615457 | 0.61003127 | 0.58536202 |
| Q9ULL5 | PRR12    | TSSFLLR                   | S256      | 0.51154878 | 1.17968805 | 0.7574445  |
| Q5THK1 | PRR14L   | DLLVSSGSNNSLPCGSPK        | S1029     | 0.80069932 | 1.13038286 | 0.91398245 |
| P48634 | PRRC2A   | QRGSETGSETHSDLAPSDK       | S1106     | 0.12980905 | 1.23191682 | 0.5125107  |
| P48634 | PRRC2A   | EGPEPPEEVPPPTTPVPK        | T610      | 0.36693362 | 1.18054256 | 0.67368198 |
| P48634 | PRRC2A   | QSSSEISLAVER              | S456      | 0.41728805 | 0.90667585 | 0.70851118 |
| P48634 | PRRC2A   | ERSDSGGSSSEPFDR           | S761      | 0.51208508 | 0.93545611 | 0.7574445  |
| P48634 | PRRC2A   | SEGSEYEIIPK               | S1089     | 0.58857088 | 1.09983098 | 0.80250619 |



|        |           |                                  |             |            |            |            |
|--------|-----------|----------------------------------|-------------|------------|------------|------------|
| P48634 | PRRC2A    | KQSSSEISLAVER                    | S456        | 0.74841701 | 1.03360656 | 0.88634115 |
| P48634 | PRRC2A    | KQSSSEISLAVER                    | S458        | 0.84204641 | 1.08662208 | 0.93124502 |
| P48634 | PRRC2A    | SDSGGSSSEPFDR                    | S761        | 0.87884782 | 1.01376147 | 0.94568481 |
| P48634 | PRRC2A    | DSQSASGEERPPEADGK                | S363        | 0.974917   | 1.00481348 | 0.98795929 |
| Q5JSZ5 | PRRC2B    | VASETHSEGSEYEELPK                | S1136       | 0.02525665 | 1.24070147 | 0.4040435  |
| Q5JSZ5 | PRRC2B    | EAGSPAQEFK                       | S613        | 0.12800032 | 0.85099735 | 0.5125107  |
| Q5JSZ5 | PRRC2B    | VASETHSEGSEYEELPK                | S1132,S1136 | 0.15503053 | 0.52375303 | 0.53741649 |
| Q5JSZ5 | PRRC2B    | EVPWSPSAEK                       | S558        | 0.22344383 | 0.90603514 | 0.58267075 |
| Q5JSZ5 | PRRC2B    | EGPGSEPDSDVGGSLGASLGEK           | S1395       | 0.53582617 | 0.914427   | 0.77065324 |
| Q5JSZ5 | PRRC2B    | CSPLPDFVPDEK                     | S853        | 0.91747053 | 1.01313232 | 0.96556856 |
| Q9Y520 | PRRC2C    | QRGSETDDEIHEASADK                | S1263       | 0.02702697 | 1.5903189  | 0.40703825 |
| Q9Y520 | PRRC2C    | SESSDFEVVVK                      | S1249       | 0.04618157 | 1.8668051  | 0.44605308 |
| Q9Y520 | PRRC2C    | LPDLSPVENK                       | S2105       | 0.73361155 | 1.04680095 | 0.87923537 |
| Q9Y520 | PRRC2C    | SVEDVRPHHTDANNQSACFEAPDQK        | T887        | 0.86366201 | 1.02570233 | 0.94127488 |
| Q9Y520 | PRRC2C    | SVEDVRPHHTDANNQSACFEAPDQK        | S878        | 0.88716184 | 0.97741408 | 0.94861919 |
| Q9NV10 | PSD3      | SHSSPSLNPDTSPITAK                | T1019,S1014 | 0.24091241 | 0.80463755 | 0.58886046 |
| Q8NDX1 | PSD4      | SHSSPSLHQDEAPTTAK                | S1019       | 0.99443551 | 1.00081507 | 0.99524397 |
| P49768 | PSEN1     | AAVQELSSSILAGEDPEER              | S367        | 0.00154818 | 0.53514701 | 0.24972095 |
| O75475 | PSIP1     | TGVTSTSDSEEGDDQEGEK              | S273        | 0.03159538 | 1.70883034 | 0.40879194 |
| O75475 | PSIP1     | KPSSEERETEISLK                   | S514        | 0.22013082 | 1.30582842 | 0.58267075 |
| O75475 | PSIP1     | QSNASSDVEVEEK                    | S106        | 0.25078056 | 1.19486866 | 0.59530396 |
| P28066 | PSMA5     | ITSPLMEPSSIEK                    | S56         | 0.6303333  | 1.09925215 | 0.82390229 |
| O00231 | PSMD11    | AQSLSTDR                         | S14         | 0.10892236 | 0.6453563  | 0.51002233 |
| O95456 | PSMG1     | AGTEDEEEEEGR                     | T18         | 0.19933877 | 0.94152036 | 0.56975265 |
| Q6PGN9 | PSRC1     | LSLGLSPEK                        | S70         | 0.19142057 | 0.62215752 | 0.5651429  |
| Q9BVG9 | PTDSS2    | DAGGPRPESPVPAGR                  | S16         | 0.8770177  | 0.98284519 | 0.94565946 |
| Q15185 | PTGES3    | DWEDDSDEEDMSNFDR                 | S113        | 0.58176326 | 0.85268709 | 0.80001994 |
| Q9P035 | PTPLAD1   | WLDESDAEMELR                     | S114        | 0.04873328 | 0.55158184 | 0.44612288 |
| Q9P035 | PTPLAD1   | LESEGPSETLTLNR                   | S135        | 0.0505014  | 0.7177312  | 0.44612288 |
| P18031 | PTPN1     | GSPLNAAPIYGIEMSQDTEVR            | S352        | 0.29673219 | 0.61382041 | 0.62494294 |
| Q05209 | PTPN12    | DVDVSDSPPLPER                    | S673        | 0.02580067 | 1.20499343 | 0.4040435  |
| Q05209 | PTPN12    | SFDGNTLLNR                       | S449        | 0.41024033 | 1.1044505  | 0.70283341 |
| Q05209 | PTPN12    | VSVTPPEESQNSDTPRPRDR             | T509,T519   | 0.41409876 | 1.12153691 | 0.70793999 |
| Q05209 | PTPN12    | NLSFEIK                          | S435        | 0.9090264  | 1.00829445 | 0.96085522 |
| Q12923 | PTPN13    | AISTGLASSTLNK                    | T909,S914   | 0.14131604 | 1.34519156 | 0.52770768 |
| Q15678 | PTPN14    | ICTEQNSPPPIR                     | S314        | 0.21701843 | 1.16164502 | 0.58142167 |
| P17706 | PTPN2     | EDLSPAFDHSPNK                    | S304        | 0.06918839 | 0.82301587 | 0.4637455  |
| P26045 | PTPN3     | GSLAPQDSDSEVSQNR                 | S425        | 0.01653887 | 1.58733133 | 0.36631449 |
| P26045 | PTPN3     | SLSVEHLETK                       | S359        | 0.36688373 | 0.94153253 | 0.67368198 |
| Q92729 | PTPRU     | SGGVTEASSLLGGSPR                 | S853        | 0.27881087 | 1.439309   | 0.61249442 |
| Q14671 | PUM1      | RDSLTSGLDLYK                     | S709        | 0.65201115 | 0.96398104 | 0.83766944 |
| Q8TB72 | PUM2      | RESLTSGLDLYK                     | S587        | 0.02848386 | 0.53882434 | 0.40710444 |
| Q8TB72 | PUM2      | GKASPFEEQNR                      | S136        | 0.19868134 | 1.32873304 | 0.56975265 |
| Q8TB72 | PUM2      | QASPTVVVER                       | S182        | 0.24334023 | 1.17732884 | 0.58932994 |
| Q96QR8 | PURB      | RGGSGGGEESEGEVDED                | S304        | 0.26282131 | 1.19775821 | 0.60132025 |
| Q13610 | PWP1      | LQEEGGGDEEETGSPSEDGMQSR          | S50         | 0.11732317 | 1.26657941 | 0.51002233 |
| Q96N64 | PWWP2A    | SPEAVGPELEAEK                    | S81         | 0.25192843 | 1.13738479 | 0.59589813 |
| P49023 | PXN       | TSSVSNPQDSVSGPCSR                | S106        | 0.05379473 | 0.50837004 | 0.44612288 |
| P49023 | PXN       | SSPGGQDEGGFMAQGK                 | S302        | 0.97249687 | 0.99883109 | 0.98687477 |
| Q9BRQ0 | PYGO2     | GGGTPDANSLAPPGK                  | T302        | 0.18653704 | 1.12211927 | 0.55994868 |
| Q9Y3T6 | R3HC1     | FGSTLQLDLEK                      | T277        | 0.39732228 | 0.79951136 | 0.69247075 |
| Q15032 | R3HDM1    | YSEPRPWSSTSDSSSLR                | T363        | 0.82175753 | 1.05710564 | 0.92458845 |
| Q15032 | R3HDM1    | AASTDLGAGETVVGK                  | S973        | 0.88289937 | 0.96249273 | 0.94748969 |
| Q9Y2K5 | R3HDM2    | SASTDLGTADVVLGR                  | T856        | 0.99472367 | 1.00066573 | 0.99524397 |
| Q6WKZ4 | RAB11FIP1 | LEVSPAQPTAR                      | S545        | 0.09831069 | 1.28071834 | 0.5018786  |
| Q6WKZ4 | RAB11FIP1 | DSGSDTASAIIPSTTPSVSDDESIVK       | S202        | 0.69622857 | 0.93657606 | 0.86021959 |
| Q6IQ22 | RAB12     | AGGGGGLGAGSPALSGGQGR             | S21         | 0.21122892 | 1.2387981  | 0.57694357 |
| Q15042 | RAB3GAP1  | KTSASDVNTNIPGDAGK                | T536        | 0.75948061 | 1.04456999 | 0.88966056 |
| Q15042 | RAB3GAP1  | KTSASDVNTNIPGDAGK                | S537        | 0.87271768 | 0.98554302 | 0.94378338 |
| Q3YEC7 | RABL6     | NDSDLFGLGLEEAGPKESSEEGK          | S640        | 0.21563532 | 0.42471894 | 0.58136831 |
| Q3YEC7 | RABL6     | SFLEDTPPAR                       | S402        | 0.27563335 | 0.77684427 | 0.60861957 |
| Q9H0H5 | RACGAP1   | SIGSAVDQGNESIVAK                 | S203        | 0.78448227 | 0.95050946 | 0.90620964 |
| Q9NS91 | RAD18     | NDLQDTEISPR                      | S471        | 0.21756632 | 0.81977472 | 0.58142167 |
| P54725 | RAD23A    | EDKSPSEESAPTTSPESVSGVSPSSGSSGR   | S123        | 0.04612493 | 1.3577005  | 0.44605308 |
| P54725 | RAD23A    | SPSEESAPTTSPESVSGVSPSSGSSGR      | S125        | 0.58662489 | 0.9202415  | 0.8012074  |
| P54725 | RAD23A    | SPSEESAPTTSPESVSGVSPSSGSSGR      | S123        | 0.66505805 | 0.89753404 | 0.84417266 |
| Q99638 | RAD9A     | SPQGPSPVLAEDSEGEK                | S387        | 0.04126008 | 1.3489835  | 0.43680889 |
| P04049 | RAF1      | AAHTEDINACTLITSPR                | S642        | 0.74820109 | 0.94690266 | 0.88634115 |
| Q15311 | RALBP1    | IAQEIASLSK                       | S463        | 0.01641273 | 1.46089767 | 0.36631449 |
| Q15311 | RALBP1    | TGEPSPPHDILHEPPDVVSDDEK          | S62         | 0.16619578 | 0.83404581 | 0.54308896 |
| Q15311 | RALBP1    | TPSSEISPTK                       | S29         | 0.20065485 | 1.22125    | 0.56975265 |
| Q6GYQ0 | RALGAPA1  | SSSTSILEPFTVER                   | T798        | 0.03580459 | 1.26847291 | 0.42091393 |
| Q6GYQ0 | RALGAPA1  | TVDIDDAQILPR                     | T754        | 0.04461095 | 0.68122533 | 0.44293212 |
| Q6GYQ0 | RALGAPA1  | RGSSPGSLEIPK                     | S860        | 0.10481189 | 1.15891701 | 0.50572948 |
| Q9UKM9 | RALY      | TRDDGDEEGLLTHSEEELEHSQDTDADDGALQ | S288        | 0.29057509 | 0.31514265 | 0.62187612 |
| Q9UKM9 | RALY      | DDGDEEGLLTHSEEELEHSQDTDADDGALQ   | S288        | 0.46826092 | 0.73234807 | 0.73223932 |
| Q9UKM9 | RALY      | GRLSPVPVPR                       | S135        | 0.67527373 | 1.41917874 | 0.84997288 |
| Q6VN20 | RANBP10   | HEDLQDDESSMDDR                   | S489        | 0.78200983 | 0.93834986 | 0.90515203 |
| P49792 | RANBP2    | NHETDGGSAHGDDDDGPHFEPVPLPK       | S1160       | 0.18610056 | 0.41795743 | 0.55994868 |
| P49792 | RANBP2    | EDALDSSVSSSVHASPSSVPRK           | S2246,S2250 | 0.40634867 | 1.17842324 | 0.69976652 |
| P49792 | RANBP2    | LNQSGTSGVGTDEESDVTQEER           | T2293       | 0.73166932 | 1.00817757 | 0.87811206 |

|        |         |                                |           |            |            |            |
|--------|---------|--------------------------------|-----------|------------|------------|------------|
| P49792 | RANBP2  | EDALDDSVSSSVHASPLASSPVRK       | S2250     | 0.75704919 | 1.07235054 | 0.88966056 |
| P49792 | RANBP2  | YLSLSPK                        | S788      | 0.99251842 | 0.99899204 | 0.99498584 |
| Q9H6Z4 | RANBP3  | SPSEAADEVCALEEK                | S219      | 0.37004478 | 0.93045326 | 0.67368198 |
| Q9H6Z4 | RANBP3  | SAGGSSPEGGEDSDREDGNYCPPVK      | S108      | 0.66847736 | 0.88756515 | 0.84602117 |
| P47736 | RAP1GAP | RSSAIGIENIQEVQEK               | S499      | 0.34701769 | 0.76807517 | 0.66293814 |
| P47736 | RAP1GAP | SQSMAMDGLSNK                   | S441      | 0.6798197  | 0.93538121 | 0.85135805 |
| Q9UJF2 | RASAL2  | SPSQDNTDSYFR                   | S665      | 0.12707701 | 0.73553303 | 0.5125107  |
| Q9UJF2 | RASAL2  | QQTQQVQSPVDSATMSPVER           | S954      | 0.95557518 | 1.01335977 | 0.98174698 |
| P06400 | RB1     | TLQTDSDSIFETQRTPR              | T353      | 0.02053219 | 0.77530078 | 0.37949754 |
| P06400 | RB1     | FPSSPLR                        | S795      | 0.52826196 | 0.89041386 | 0.76614217 |
| P06400 | RB1     | FPSSPLR                        | S794      | 0.5526695  | 1.12709696 | 0.78129351 |
| P06400 | RB1     | TAVIPINGSR                     | S249      | 0.84318256 | 1.03451408 | 0.93154348 |
| P06400 | RB1     | ISEGLPTPTKMTPR                 | T821,T826 | 0.94374506 | 1.02569849 | 0.9773745  |
| P06400 | RB1     | SNLDEEVNIPPHTPVR               | T373      | 0.96318496 | 0.98847805 | 0.98250904 |
| Q8TDY2 | RB1CC1  | STELVLSPDMR                    | S237      | 0.00434888 | 1.40305229 | 0.29204389 |
| Q8TDY2 | RB1CC1  | LDSLPEHEDSEK                   | S222      | 0.86399023 | 1.01473477 | 0.94131458 |
| Q09028 | RBBP4   | TPSSDVLVFDYTK                  | S146      | 0.1852356  | 0.85116353 | 0.55994868 |
| Q7Z6E9 | RBBP6   | DDFESEEDVK                     | S1328     | 0.11327188 | 1.16448326 | 0.51002233 |
| Q7Z6E9 | RBBP6   | DDATPVRDEPMDAESITFK            | T984      | 0.42740329 | 0.85909823 | 0.7137923  |
| Q7Z6E9 | RBBP6   | LEVTEIVKPSPK                   | S1179     | 0.99201252 | 1.00207223 | 0.99498584 |
| P28749 | RBL1    | DMQPLSPISVHER                  | S640      | 0.04699612 | 0.74474821 | 0.44612288 |
| P98175 | RBM10   | LASDDRPPSPR                    | S723      | 0.34322051 | 1.13229182 | 0.66290366 |
| P98175 | RBM10   | AHLSENELEALEK                  | S797      | 0.34457008 | 0.78345171 | 0.66293814 |
| Q8IXT5 | RBM12B  | SPQEEDFRCPDSEDFR               | S839      | 0.05263812 | 1.42592593 | 0.44612288 |
| Q8IXT5 | RBM12B  | FPPEDFRHSPEDFR                 | S575      | 0.28381157 | 0.84498064 | 0.61816331 |
| Q96PK6 | RBM14   | QTPPPFFGR                      | T206      | 0.20954055 | 1.21249318 | 0.57442583 |
| Q96T37 | RBM15   | RDGWSLDR                       | S622      | 0.03174502 | 1.40581348 | 0.40879194 |
| Q96T37 | RBM15   | DRTPLLRY                       | T568      | 0.19159224 | 1.07395668 | 0.5651429  |
| Q96T37 | RBM15   | SLSPPGGAALGYR                  | S294      | 0.19719021 | 1.11987068 | 0.56848581 |
| Q96T37 | RBM15   | HLDRSPESDRPR                   | S656      | 0.22273313 | 2.87320854 | 0.58267075 |
| Q96T37 | RBM15   | HCAPSPDRSPELSSSR               | S670,S674 | 0.73015675 | 1.03355033 | 0.87667044 |
| Q8NDT2 | RBM15B  | DRTPPHLLYSR                    | T532      | 0.18310508 | 0.84203767 | 0.55778752 |
| Q8NDT2 | RBM15B  | ASGDPGASGMSR                   | S109      | 0.20906588 | 1.22395833 | 0.57425546 |
| Q8NDT2 | RBM15B  | TFLEGDWTSPSK                   | S552      | 0.21789343 | 0.88402527 | 0.58142167 |
| Q8NDT2 | RBM15B  | RNSLEGYSR                      | S562      | 0.60537791 | 1.08915502 | 0.81203707 |
| Q9Y4C8 | RBM19   | DPAEPETVPDGETPEDENPTEEGADNSSAK | S710      | 0.10885354 | 1.24217687 | 0.51002233 |
| Q9NW64 | RBM22   | ATSTSDMLLK                     | T143      | 0.70172685 | 1.08395889 | 0.86274503 |
| Q86U06 | RBM23   | SPVREPVDNLSPEER                | S149      | 0.52093175 | 0.94293478 | 0.76229747 |
| P49756 | RBM25   | FEDESDDVPRK                    | S703      | 0.08792878 | 1.25863771 | 0.4960359  |
| P49756 | RBM25   | LGASNSPGQPNSVK                 | S677      | 0.10562907 | 1.27293166 | 0.50572948 |
| P49756 | RBM25   | LGASNSPGQPNSVK                 | S683      | 0.33939439 | 1.35632985 | 0.65917296 |
| P49756 | RBM25   | QEPESEEEEEK                    | S583      | 0.87006953 | 0.96222423 | 0.94316005 |
| Q5T8P6 | RBM26   | EGSTQQLQTTSPK                  | S616      | 0.92553942 | 1.01496998 | 0.96756561 |
| Q9P2N5 | RBM27   | AMSGLEGPLTK                    | S566      | 0.21607582 | 0.5589454  | 0.58136831 |
| Q96EV2 | RBM33   | DIKEESEDEEEDDEESGR             | S205      | 0.1700207  | 1.32846863 | 0.54531589 |
| Q96EV2 | RBM33   | EESDEEEDDEESGR                 | S205      | 0.93746523 | 0.97328651 | 0.97414011 |
| P42696 | RBM34   | SVQEGENPDDGVR                  | S14       | 0.84700783 | 1.02029104 | 0.93257586 |
| Q14498 | RBM39   | YRSPYSGPK                      | S97       | 0.09728352 | 1.21842216 | 0.5018786  |
| Q14498 | RBM39   | YRSPYSGPK                      | Y95       | 0.3407373  | 1.13467157 | 0.65997492 |
| Q14498 | RBM39   | IGLPHSIK                       | S117      | 0.64168698 | 1.12701101 | 0.83055345 |
| Q14498 | RBM39   | SPVREPIDNLTPEER                | S136      | 0.84637208 | 0.98136646 | 0.93243816 |
| P78332 | RBM6    | EGETQGVAFEHESPADFNQNSQSPVQDQDK | S362      | 0.22543095 | 1.16848927 | 0.58267075 |
| Q9Y580 | RBM7    | SFSSPENFOR                     | S136      | 0.48889577 | 0.8726975  | 0.74430285 |
| Q9Y580 | RBM7    | MNSYPYLADR                     | S204      | 0.99493546 | 1.00143626 | 0.99524397 |
| Q9Y559 | RBM8A   | GFGSEEGSR                      | S42       | 0.54338415 | 1.13992922 | 0.77269004 |
| Q9Y559 | RBM8A   | MREDYDSVEQDGDGEPGQR            | S56       | 0.90706918 | 1.01019332 | 0.96047477 |
| P38159 | RBMX    | VEQATKPSFESGR                  | S88       | 0.35609461 | 0.90985264 | 0.66749635 |
| P38159 | RBMX    | DVYLSR                         | S208      | 0.55579252 | 1.06013442 | 0.78182069 |
| Q9Y388 | RBMX2   | EVQAEQPSSSSPR                  | S188      | 0.43684904 | 1.08050979 | 0.71982749 |
| Q9HBD1 | RC3H2   | KQSLGEDHVILEEQK                | S1119     | 0.15551055 | 0.74750425 | 0.53741649 |
| Q9UKL0 | RCOR1   | ERESEDELEANGNNPIDIEVDQNK       | S257      | 0.23133043 | 0.35227072 | 0.58402227 |
| Q9UKL0 | RCOR1   | ESESELEANGNNPIDIEVDQNK         | S257      | 0.3271098  | 0.27549093 | 0.64779386 |
| O94761 | RECQL4  | RPSQDDVEAAPEETR                | S27       | 0.09805117 | 0.68429912 | 0.5018786  |
| O94761 | RECQL4  | GRRPSQDDVEAAPEETR              | S27       | 0.80383018 | 1.02661827 | 0.914371   |
| O94762 | RECQL5  | GEVPGGSAHYGGPSPEK              | S727      | 0.00939445 | 0.88601294 | 0.33303827 |
| O94762 | RECQL5  | YTGEEDEGAGGHSAPPQTEECLR        | S815      | 0.02656002 | 1.35153846 | 0.40703825 |
| Q9H6H4 | REEP4   | SFSMQDLR                       | S152      | 0.75164407 | 1.04814109 | 0.88774061 |
| Q96D71 | REPS1   | RQSSSYDDPWK                    | S272      | 0.05463533 | 1.16101695 | 0.4484824  |
| Q9P2R6 | RERE    | TSPINEDIR                      | S600      | 0.04658852 | 0.85787848 | 0.44612288 |
| O60673 | REV3L   | TLSFR                          | S1075     | 0.41794799 | 0.89030362 | 0.70874058 |
| P35251 | RFC1    | ELSQNTDESGLNDEAIAK             | S190      | 0.56305995 | 0.82011036 | 0.78599368 |
| P48382 | RFK5    | GSESPMGPEVTPAPR                | S185      | 0.35400463 | 0.95608157 | 0.66702539 |
| O43566 | RG514   | SLGSTESESRPGK                  | S288      | 0.11872287 | 1.36791547 | 0.51002233 |
| P49796 | RG53    | THSEGSLLQEPR                   | S943      | 0.17389611 | 0.82774049 | 0.54778823 |
| P49796 | RG53    | DLPAIQESPTR                    | S806      | 0.38530543 | 1.09021601 | 0.68072033 |
| P49796 | RG53    | THSEGSLLQEPR                   | T941      | 0.60159649 | 1.10329355 | 0.8111934  |
| Q6PJF5 | RHBD2   | SVSLQEPR                       | S90       | 0.32867139 | 0.79122012 | 0.64890487 |
| Q6PJF5 | RHBD2   | DLELPSQEAQSPFGTESPKPKK         | T175      | 0.62283308 | 0.9394572  | 0.82174981 |
| Q6R327 | RICTOR  | NDSGEENVPLDLTR                 | S21       | 0.15632517 | 0.86596859 | 0.53741649 |
| Q6R327 | RICTOR  | HNSESEVPSMFILEDDR              | S1035     | 0.22792213 | 0.62034958 | 0.58267075 |
| Q6R327 | RICTOR  | GRNDSGEENVPLDLTR               | S21       | 0.37451388 | 1.06789474 | 0.67596613 |

|        |         |                                 |           |            |            |            |
|--------|---------|---------------------------------|-----------|------------|------------|------------|
| Q6R327 | RICTOR  | STELLGVK                        | T1592     | 0.48385278 | 1.12657931 | 0.74167539 |
| Q6R327 | RICTOR  | ALSYASLDK                       | S1388     | 0.99486161 | 0.99888068 | 0.99524397 |
| Q5UIP0 | RIF1    | RASQGLLSIENSEDSSEAK             | S1542     | 0.04145079 | 0.64012627 | 0.43680889 |
| Q5UIP0 | RIF1    | SPQRPSDWSK                      | S782      | 0.1255768  | 0.82630873 | 0.5125107  |
| Q5UIP0 | RIF1    | ASQGLLSIENSEDSSEAK              | S1554     | 0.35511644 | 0.90607558 | 0.66702539 |
| Q5UIP0 | RIF1    | SNESVDIQDQEEK                   | S1579     | 0.46876065 | 0.88639799 | 0.73231082 |
| Q5UIP0 | RIF1    | RDSFDNCSLGEESK                  | S1688     | 0.56845637 | 0.94007914 | 0.79044838 |
| Q5UIP0 | RIF1    | RSQEDEISSPVNK                   | S2195     | 0.64003673 | 0.8567235  | 0.83055345 |
| Q5UIP0 | RIF1    | ELDPSLVSANDSPSGMQTR             | S2161     | 0.72113006 | 0.92646867 | 0.87405855 |
| Q5UIP0 | RIF1    | STDFVFIPEGK                     | T1047     | 0.93760231 | 1.02597403 | 0.97414011 |
| Q13671 | RIN1    | GSPATSPHLGR                     | T336      | 0.08181834 | 1.24377321 | 0.49060587 |
| Q13671 | RIN1    | GSPATSPHLGR                     | S337      | 0.49746465 | 1.07266757 | 0.74981346 |
| Q06587 | RING1   | GGGAGGSSVGTGGGGTGGVGGGAGSEDSGDR | S229      | 0.45084088 | 1.08330025 | 0.72422173 |
| Q9BRS2 | RIOK1   | VVPGQFDDADSSDSENR               | S22       | 0.65576345 | 0.95425408 | 0.8394813  |
| Q13129 | RLF     | SPSAIPEQNHSLNDQAK               | S632      | 0.72791767 | 0.91781464 | 0.87523758 |
| Q967C7 | RMDN3   | SQSLPNSLDYQTSDPGR               | S44       | 0.82357394 | 0.93614766 | 0.92458845 |
| O60930 | RNASEH1 | SASPEVSEGHENQHGGQSEAK           | S76       | 0.46219997 | 1.15707011 | 0.72895075 |
| Q8WU17 | RNF139  | EAAAESDRELNEDDSTDCDDVQQR        | S625      | 0.00320012 | 8.9736305  | 0.29204389 |
| Q8NCN4 | RNF169  | GSVDQYLLR                       | S693      | 0.88606284 | 1.02303711 | 0.94851488 |
| Q5VTR2 | RNF20   | SGSALLQSQSTEDPK                 | T526      | 0.22811143 | 0.71421795 | 0.58267075 |
| Q5VTR2 | RNF20   | ALVVPEPEPDSNSQERK               | S138      | 0.3819446  | 0.67359213 | 0.67941113 |
| Q5VTR2 | RNF20   | ALVVPEPEPDSNSQER                | S138      | 0.82799459 | 0.95822078 | 0.92537257 |
| Q63HN8 | RNF213  | DFATPSLHTSDQSPGK                | S2273     | 0.92659651 | 0.98370911 | 0.96756561 |
| Q63HN8 | RNF213  | EDQEAALLSEPEEESER               | S1258     | 0.97719052 | 0.99538807 | 0.98883833 |
| Q5W0B1 | RNF219  | IQSSLSASPSK                     | S719      | 0.05751826 | 0.78183765 | 0.45298462 |
| Q96EP0 | RNF31   | RLSAPLPSSCGDPEK                 | S466      | 0.12394542 | 1.22610015 | 0.5125107  |
| Q9BWH6 | RPAP1   | ARPSGHCLEPEDEPEER               | S80       | 0.1381255  | 0.78798001 | 0.52409548 |
| P30050 | RPL12   | IGPLGLSPK                       | S38       | 0.05288681 | 0.55671638 | 0.44612288 |
| P62750 | RPL23A  | IRTSPTFR                        | T42       | 0.06982745 | 1.39696248 | 0.4637455  |
| P46776 | RPL27A  | NQSFCTVNLDK                     | S68       | 0.00483666 | 0.48851348 | 0.29204389 |
| P46776 | RPL27A  | MPSRLR                          | S3        | 0.15531047 | 1.59813324 | 0.53741649 |
| P78346 | RPP30   | KPRPSEGEDECLPASK                | S251      | 0.70377644 | 1.02850356 | 0.86457837 |
| Q5VT52 | RPRD2   | SGTPTQDEMMDKPTSSVDTMSLLSK       | T732      | 0.2412463  | 0.68558159 | 0.58886046 |
| Q5VT52 | RPRD2   | GPTSTSIDNIDGTPVRDER             | T723      | 0.34437286 | 1.14531044 | 0.66293814 |
| Q5VT52 | RPRD2   | DVEDMELSDVEDDGSK                | S374      | 0.36866129 | 0.86252588 | 0.67368198 |
| Q5VT52 | RPRD2   | MSGEQIQTVESIR                   | S1099     | 0.76524373 | 1.10076021 | 0.89347676 |
| Q5VT52 | RPRD2   | RMSGEQIQTVESIR                  | S1099     | 0.88808182 | 1.04123235 | 0.94927317 |
| Q9NQC9 | RPS10P5 | AEAGAGSATEFQFR                  | S157      | 0.30920791 | 0.94003869 | 0.63653708 |
| P62263 | RPS14   | IEDVTPIPSDSTR                   | T140      | 0.09740689 | 0.742436   | 0.5018786  |
| P42677 | RPS27   | DLLHPSPEEEK                     | S11       | 0.07889563 | 0.89377714 | 0.48479487 |
| P42677 | RPS27   | LTEGCSFR                        | S78       | 0.08648726 | 0.70389954 | 0.49557355 |
| P23396 | RPS3    | DEILPTTPISEQK                   | T221      | 0.14641723 | 1.18550034 | 0.53170891 |
| P61247 | RPS3A   | LMELHGEGSSSGK                   | S237      | 0.25851876 | 0.91912554 | 0.5989986  |
| P61247 | RPS3A   | ADGYEPPVQESV                    | S263      | 0.84868635 | 0.97820823 | 0.93283208 |
| P62753 | RPS6    | LSSLRASTSK                      | T241,S236 | 0.00062838 | 0.21582924 | 0.21503578 |
| P51812 | RPS6KA3 | NQSPVLEPVGR                     | S715      | 0.09626321 | 0.82573179 | 0.5018786  |
| O75676 | RPS6KA4 | LEPVYSPGSPPPGDPR                | S347      | 0.19967471 | 1.1723318  | 0.56975265 |
| O75676 | RPS6KA4 | LEPVYSPGSPPPGDPR                | S343,S347 | 0.4561912  | 0.78939034 | 0.72561974 |
| P62070 | RRAS2   | FQEQECPPSPEPTRK                 | S186      | 0.16914984 | 1.20289593 | 0.54531589 |
| P62070 | RRAS2   | FQEQECPPSPEPTR                  | S186      | 0.33559294 | 0.84251265 | 0.65720257 |
| P62070 | RRAS2   | KFQEQECPPSPEPTR                 | T190      | 0.36569716 | 0.89375231 | 0.67336704 |
| P62070 | RRAS2   | KFQEQECPPSPEPTR                 | S186      | 0.97235814 | 0.9962963  | 0.98687477 |
| Q9P2E9 | RRBP1   | SHVEDGDIAGAPASSPEAPPAEQDPVQLK   | S1277     | 0.00021215 | 1.4518852  | 0.10490076 |
| Q9P2E9 | RRBP1   | NTDVAQSPEAPK                    | S615      | 0.08072915 | 1.4623323  | 0.48773691 |
| Q92766 | RREB1   | QVAGDAPVEQATAETASPVHR           | S1320     | 0.25265439 | 1.19105731 | 0.59589813 |
| Q5JTH9 | RRP12   | GDSIEILADSEDEEDNEEEER           | S1080     | 0.23827399 | 0.27566341 | 0.58659078 |
| Q9Y3B9 | RRP15   | ESDGPDDSRPESASDSDT              | T282      | 0.00022762 | 1.11490742 | 0.10490076 |
| Q9Y3B9 | RRP15   | DHFYSDDDAIEADSEGDAPPCDK         | S58       | 0.35199918 | 0.83478969 | 0.66702539 |
| Q14684 | RRP1B   | SILVSPTGPSR                     | S706      | 0.15232926 | 0.73581829 | 0.53741649 |
| Q14684 | RRP1B   | VAEPGAEATSSTGEESEGSEHPAVPMHMK   | S458      | 0.1554799  | 1.22441453 | 0.53741649 |
| Q14684 | RRP1B   | TPTSSPASSPLVAK                  | S732      | 0.37107992 | 0.83371617 | 0.67442469 |
| Q14684 | RRP1B   | VFCVEEEDSESSLQK                 | S392      | 0.52416382 | 1.061      | 0.76409963 |
| Q14684 | RRP1B   | VGDGDLSAEEIPENEVSLR             | S245      | 0.7361144  | 0.9615815  | 0.87923537 |
| Q14684 | RRP1B   | VAEPGAEATSSTGEESEGSEHPAVPMHMK   | S453,S458 | 0.87735858 | 1.03233256 | 0.94565946 |
| Q96723 | RSF1    | NSSQDQNSRESPLEDEETK             | S227      | 0.06399443 | 1.22873346 | 0.46076126 |
| Q96723 | RSF1    | IETDEEECDNAHGDNQPAR             | T1305     | 0.14394176 | 1.17287867 | 0.52860081 |
| Q96723 | RSF1    | IESDEEEDFENVGK                  | S1345     | 0.27346182 | 1.08045052 | 0.60684527 |
| Q96723 | RSF1    | DAQRLSPIPEEVPK                  | S604      | 0.55661806 | 1.08722741 | 0.78207747 |
| Q96723 | RSF1    | STLESEKPGSPEAAETSPPSNIIDHCEK    | T628,S622 | 0.6290281  | 0.91577335 | 0.82322298 |
| Q96723 | RSF1    | STLESEKPGSPEAAETSPPSNIIDHCEK    | S622      | 0.88423483 | 1.01802786 | 0.94768823 |
| O76021 | RSL1D1  | ATNESEDEIPQLVPIGK               | T358      | 0.48464096 | 1.05941846 | 0.74167539 |
| Q7L4I2 | RSRC2   | EQSEVSVSPR                      | S32       | 0.25707394 | 1.20952789 | 0.59892773 |
| O95197 | RTN3    | DSPEPFVEIIDK                    | S246      | 0.08116474 | 0.72714977 | 0.48850271 |
| O95197 | RTN3    | VEGIYITSLSPSK                   | S229      | 0.50106104 | 0.8347185  | 0.75168596 |
| Q9NQC3 | RTN4    | EDEVSSSEKAK                     | S361      | 0.98961873 | 0.99832285 | 0.99486133 |
| Q01196 | RUNX1   | RFTPPSTALSPGK                   | T14,S21   | 0.79788129 | 0.97921274 | 0.91349783 |
| Q99584 | S100A13 | KDLSVNEFK                       | S32       | 0.39492486 | 1.17301738 | 0.69203019 |
| A6NKF1 | SAC3D1  | TLEEVMAEEDEGTDRPGSPA            | S402      | 0.18408941 | 0.26866051 | 0.55849825 |
| Q15424 | SAFB    | RSVVVFDK                        | S604      | 0.29986769 | 1.22300073 | 0.62653702 |
| Q15424 | SAFB    | SVVSVFDK                        | S604      | 0.61072467 | 0.95994065 | 0.81488009 |
| Q14151 | SAFB2   | EESSELEQPFQAQDTSVGPDRK          | S234      | 0.11130387 | 1.41870629 | 0.51002233 |

|        |         |                                       |             |            |            |            |
|--------|---------|---------------------------------------|-------------|------------|------------|------------|
| Q14151 | SAFB2   | EESSELEQPFAQDTSSVGPDR                 | S234        | 0.18027996 | 0.86107865 | 0.55295852 |
| Q14151 | SAFB2   | EESSELEQPFAQDTSSVGPDRK                | T244        | 0.2516779  | 1.2079847  | 0.59589813 |
| Q14151 | SAFB2   | EESSELEQPFAQDTSSVGPDR                 | S246        | 0.37233089 | 0.89229806 | 0.67479745 |
| Q14151 | SAFB2   | MEEEGTENDNGLEDDSR                     | S109        | 0.59196651 | 0.88455989 | 0.80543398 |
| Q14151 | SAFB2   | EESSELEQPFAQDTSSVGPDR                 | S233        | 0.60391304 | 0.89752623 | 0.81202192 |
| Q9UHR5 | SAP30BP | GGLVSDAYGEDDFSR                       | S43         | 0.26919359 | 1.11863034 | 0.60403212 |
| Q86UD0 | SAPCD2  | SPEQLCAPAEAAPCPAEPER                  | S157        | 0.03231135 | 0.43941518 | 0.40879194 |
| Q9H7N4 | SCAF1   | TPEVFLPEATEEAGVR                      | T1001       | 0.23945072 | 0.36912114 | 0.58659409 |
| Q9H7N4 | SCAF1   | AAPPPPALTPDSQTVDSCK                   | T989        | 0.36103073 | 0.89030884 | 0.6705258  |
| Q9H7N4 | SCAF1   | QRSPSPAPAPAAAAAGPPTR                  | S498,S500   | 0.53742217 | 0.89971347 | 0.77155648 |
| Q9H7N4 | SCAF1   | EAASSSGTQPAPPASPWDSKK                 | S552        | 0.64086366 | 1.23205475 | 0.83055345 |
| Q9H7N4 | SCAF1   | GAEETSWSGEER                          | S965        | 0.83395874 | 0.96378378 | 0.9277072  |
| Q99590 | SCAF11  | FHSPSTTWSPNK                          | S796,S802   | 0.05255721 | 0.89052666 | 0.44612288 |
| Q99590 | SCAF11  | VETVQSPSEPKDTIDK                      | S774        | 0.12067535 | 1.84713218 | 0.51002233 |
| Q99590 | SCAF11  | VETVQSPSEPKDTIDK                      | S771,S776   | 0.14337594 | 1.86005259 | 0.5281867  |
| Q99590 | SCAF11  | AETASQSQRSPISDNSGCDAPGNSNPSLSPSSAESEK | S335        | 0.14560265 | 3.10392532 | 0.53170891 |
| Q99590 | SCAF11  | SSNSVSDVEETAESDTPVLEK                 | S405        | 0.34697601 | 0.74063047 | 0.66293814 |
| Q99590 | SCAF11  | LESSEGEIQTVDLR                        | S614        | 0.49530959 | 0.91086827 | 0.74968842 |
| Q99590 | SCAF11  | SPISDNSGCDAPGNSNPSLSPSSAESEK          | S338        | 0.50613267 | 1.09062838 | 0.75314323 |
| Q9UPN6 | SCAF8   | ETVQTTQSPTPVEK                        | S617        | 0.088607   | 1.17586721 | 0.4960359  |
| Q12770 | SCAP    | RDSGVGSGLEAQESWER                     | S826        | 0.27232021 | 0.61808262 | 0.60684527 |
| O95171 | SCEL    | YSSDDTLDR                             | S91         | 0.12503874 | 1.39497423 | 0.5125107  |
| O95171 | SCEL    | GQSLDNLK                              | S389        | 0.16246409 | 1.2722263  | 0.54196083 |
| O95171 | SCEL    | SSEQGLDEHINVSPK                       | S475        | 0.58446776 | 0.85252053 | 0.80108627 |
| O95171 | SCEL    | GIQSLGSPK                             | S312        | 0.68445614 | 1.04689524 | 0.85273769 |
| O95171 | SCEL    | RSELDLNATEVNP                         | S347        | 0.75387534 | 0.96749358 | 0.88807985 |
| Q8WVM8 | SCFD1   | VNLEESSGVENSPAGARPK                   | S303        | 0.01635369 | 1.18721351 | 0.36631449 |
| Q9P0W5 | SCHIP1  | TETSLDTPLSPMSK                        | S330        | 0.22474416 | 0.79457993 | 0.58267075 |
| Q9BWG6 | SCNM1   | EPEPAAGQAEESATVSAPAPMSPTR             | S183        | 0.39696964 | 1.10965891 | 0.69247075 |
| Q14160 | SCRIB   | NSLESISSIDR                           | S1223       | 0.01340099 | 1.26709031 | 0.36591793 |
| Q14160 | SCRIB   | RVSLVGADDLR                           | S1378       | 0.08731905 | 0.70398097 | 0.4960359  |
| Q14160 | SCRIB   | SLEQDALR                              | S1508       | 0.18049405 | 0.78154051 | 0.55295852 |
| Q14160 | SCRIB   | MVEPENAVITPLRPEDDYSPR                 | S835        | 0.22688439 | 0.70736842 | 0.58267075 |
| Q14160 | SCRIB   | VQSPPEPPAPER                          | S1475       | 0.22725579 | 0.88744257 | 0.58267075 |
| Q14160 | SCRIB   | LSPDFAEELR                            | S1566       | 0.2785862  | 0.83926562 | 0.61249442 |
| Q14160 | SCRIB   | ALSPAELR                              | S1486       | 0.29319622 | 0.83636364 | 0.62260296 |
| Q14160 | SCRIB   | QSPASPPPLGGGAPVR                      | S1448       | 0.37986595 | 1.1590362  | 0.67779179 |
| Q14160 | SCRIB   | SEACPCQPDGSGPLPAEEK                   | S504        | 0.49786126 | 0.92362598 | 0.74981346 |
| Q14160 | SCRIB   | RSEACPCQPDGSGPLPAEEK                  | S504        | 0.59065132 | 0.95305544 | 0.80466265 |
| Q14160 | SCRIB   | MAEPCSPGSGQPPSPSPDEL PANVK            | S1298,S1309 | 0.91201174 | 1.0192995  | 0.96337585 |
| Q14160 | SCRIB   | LRVQSPPEPPAPER                        | S1475       | 0.91961466 | 1.03549489 | 0.96626315 |
| Q96FV2 | SCRN2   | DEVQEVFVPAGTHTPGSR                    | S55         | 0.54083928 | 0.94191152 | 0.7718622  |
| Q9NVU7 | SDAD1   | YIEIDSDEEPR                           | S585        | 0.16921722 | 0.76334465 | 0.54531589 |
| P18827 | SDC1    | KDEGSYSLEEK                           | S285        | 0.02329685 | 1.45645479 | 0.39017457 |
| P18827 | SDC1    | DEGSYSLEEK                            | S287        | 0.12085736 | 1.21954336 | 0.51002233 |
| Q96C92 | SDCCAG3 | VSPASPAGSPADFAVHGESLGR                | S243,S247   | 0.34219576 | 0.83179211 | 0.66182465 |
| Q6IQ49 | SDE2    | VVNTDHGSPQLQIPVTDSDGR                 | S278        | 0.2692378  | 1.25483391 | 0.60403212 |
| Q92503 | SEC14L1 | EGLSGDALSSPAPEPVVGTDPDK               | S226        | 0.62449118 | 0.9011289  | 0.82174981 |
| O15027 | SEC16A  | ADSGPTQPPSLSPAPETK                    | S1905       | 0.02189656 | 1.31393801 | 0.37964331 |
| O15027 | SEC16A  | QIDSSPVGGGETDETTVSQNYR                | S391        | 0.03398167 | 1.24598001 | 0.41682455 |
| O15027 | SEC16A  | FTGSFDDDPDHRDPYGEVDR                  | S1149       | 0.13734367 | 0.77117973 | 0.52372422 |
| O15027 | SEC16A  | QIDSSPVGGGETDETTVSQNYR                | T397        | 0.60142172 | 1.05413105 | 0.8111934  |
| O15027 | SEC16A  | FTGSFDDDPDHR                          | S1149       | 0.72218323 | 0.94000317 | 0.87410666 |
| O75396 | SEC22B  | NLGSINTELQDVQR                        | S137        | 0.13484342 | 1.63038278 | 0.52075162 |
| O94979 | SEC31A  | DSDQVAQSDGEESPAEEQLLGEHIK             | S532        | 0.02874897 | 1.47150594 | 0.40710444 |
| O94979 | SEC31A  | DSDQVAQSDGEESPAEEQLLGEHIK             | S527        | 0.57722437 | 0.86315448 | 0.7967435  |
| P60468 | SEC61B  | PGPTPSGTNVGSSGRSPSK                   | S14,S17     | 0.02324111 | 5.31472963 | 0.39017457 |
| P60468 | SEC61B  | PGPTPSGTNVGSSGRSPSK                   | S17         | 0.20832284 | 1.60683761 | 0.57419211 |
| P60468 | SEC61B  | PGPTPSGTNVGSSGRSPSK                   | S13         | 0.33985987 | 1.39077481 | 0.65967987 |
| Q99442 | SEC62   | SQHSSGNGNDFEMITK                      | S353        | 0.00902545 | 1.47578632 | 0.33303827 |
| Q99442 | SEC62   | SQHSSGNGNDFEMITK                      | S356        | 0.03573961 | 1.44554455 | 0.42091393 |
| Q99442 | SEC62   | EELEQQTGDGCEEEEEENDGETPK              | T375        | 0.69412582 | 0.88072122 | 0.85860808 |
| Q9NPR2 | SEMA4B  | LGSEIR                                | S825        | 0.0173438  | 0.42056683 | 0.36734858 |
| Q15019 | SEPT2   | IYHLPDAESDEDEDFK                      | S218        | 0.29760861 | 0.8336437  | 0.62494294 |
| Q16181 | SEPT7   | SPLAQMEER                             | S334        | 0.03640291 | 0.84100418 | 0.42504778 |
| Q9UHD8 | SEPT9   | RSFEVEVETPNSTPPR                      | S30         | 0.1110703  | 0.78380144 | 0.51002233 |
| Q9UHD8 | SEPT9   | SFEVEVETPNSTPPR                       | S30         | 0.16824536 | 2.04394196 | 0.54531589 |
| Q9UHD8 | SEPT9   | LGDSGSPALK                            | S22         | 0.32187905 | 0.63680084 | 0.64145984 |
| Q9UHD8 | SEPT9   | SFEVEVETPNSTPPR                       | S30         | 0.56173458 | 1.0715272  | 0.78554018 |
| Q8NC51 | SERBP1  | SKSEEAHAEDSVMDHHR                     | S338        | 0.30236176 | 0.31790621 | 0.63052298 |
| Q8NC51 | SERBP1  | SKSEEAHAEDSVMDHHR                     | S328        | 0.30367147 | 0.34172162 | 0.63144863 |
| Q8NC51 | SERBP1  | SKSEEAHAEDSVMDHHR                     | S330        | 0.3465133  | 0.3362731  | 0.66293814 |
| Q8NC51 | SERBP1  | SSASAPDVDDPEAFPALA                    | S391        | 0.39022406 | 0.81807867 | 0.68677732 |
| Q8NC51 | SERBP1  | TDKSSASAPDVDDPEAFPALA                 | S392        | 0.44163489 | 1.38844114 | 0.72100919 |
| Q9NRX5 | SERINC1 | SDGSLDGDVHR                           | S364        | 0.01150293 | 1.72544313 | 0.3634964  |
| Q9NRX5 | SERINC1 | SDGSLDGDVHR                           | S361        | 0.01622627 | 1.67530614 | 0.36631449 |
| Q01105 | SET     | LNEQASEILK                            | S63         | 0.61326936 | 1.11055046 | 0.81560563 |
| O15047 | SETD1A  | RPRPSTPAEEDEDDPEQEK                   | T916        | 0.05928926 | 1.77987252 | 0.45298462 |
| O15047 | SETD1A  | SGSPAPETTNEVPFAQHSSLSDR               | S468        | 0.30574978 | 1.20081411 | 0.63390026 |
| Q9UP56 | SETD1B  | LRPSTSVDEEDESER                       | T985        | 0.48252066 | 1.1539439  | 0.74124365 |
| Q9BYW2 | SETD2   | NSTLPMEEETPCSSR                       | S1084       | 0.23360213 | 1.08261336 | 0.58486307 |

|        |          |                                    |           |            |            |            |
|--------|----------|------------------------------------|-----------|------------|------------|------------|
| Q9BYW2 | SETD2    | SESPFRETEPLVSPHQDK                 | S744,S754 | 0.2476802  | 0.84066704 | 0.5927592  |
| Q9C0A6 | SETD5    | VTVSSDHEEVDNPEEKPEEEK              | S476      | 0.04458929 | 1.1943958  | 0.44293212 |
| Q7Z333 | SETX     | DMHCLSEASPTFSK                     | S642      | 0.31351992 | 0.80752807 | 0.63653708 |
| Q15637 | SF1      | SPSPEPIYNSEK                       | S80,S82   | 0.84582608 | 0.895615   | 0.93222923 |
| Q15459 | SF3A1    | AEEPPSQLDQDQVQDMDEGSDDEEEGQK       | S359      | 0.67913983 | 1.1006539  | 0.85083693 |
| Q75533 | SF3B1    | LSWWDQAEPTPGHTPSLR                 | T223,S229 | 0.00653756 | 0.54983526 | 0.31708848 |
| Q75533 | SF3B1    | TMIISPER                           | S129      | 0.25754715 | 0.87081784 | 0.59892773 |
| Q75533 | SF3B1    | LLVDVDESTLSPEEQK                   | S488      | 0.45123548 | 0.69195323 | 0.72422173 |
| Q75533 | SF3B1    | WDQQTADQTPGATPK                    | T211      | 0.50684252 | 0.90878441 | 0.75314323 |
| Q75533 | SF3B1    | WDETPASQMGGSTPVLTGPK               | T354,S349 | 0.79578891 | 1.08519322 | 0.91294986 |
| P31947 | SFN      | DNLTLWTADNAGEEGEAPQEPOS            | S248      | 0.31139563 | 0.76250225 | 0.63653708 |
| Q12872 | SFSWAP   | SGVSSDNEDDDDEEDGNLHPSLFASK         | S282      | 0.33777198 | 0.45399406 | 0.65781985 |
| Q86YV5 | SGK223   | SASFAPFPK                          | S694      | 0.18015707 | 0.61886731 | 0.55295852 |
| Q86YV5 | SGK223   | CSPSGDSEGGYCSILDCCPGSPVAK          | S263      | 0.53782965 | 0.86421497 | 0.77155648 |
| Q86YV5 | SGK223   | GPVSONSEVGEETSAGQGLSSR             | S505      | 0.5409405  | 0.77893541 | 0.7718622  |
| Q86YV5 | SGK223   | VSQGSAESLSPFR                      | S743      | 0.80245503 | 1.03089676 | 0.91398245 |
| Q562F6 | SGOL2    | KTSIDPSPESHEVMER                   | S1085     | 0.31891005 | 0.69431312 | 0.63900857 |
| Q9BX95 | SGPP1    | NSLTGEEGQLAR                       | S112      | 0.22723344 | 0.94308823 | 0.58267075 |
| Q9BX95 | SGPP1    | RNSLTGEEGQLAR                      | S112      | 0.70978636 | 1.03569218 | 0.86766609 |
| Q43765 | SGTA     | SPARTPPSEEDSAEAER                  | T81,S77   | 0.67465505 | 0.90247802 | 0.84997288 |
| Q9BRG2 | SH2D3A   | SFSEDTLMDGPAR                      | S125      | 0.14301062 | 1.13528991 | 0.5281867  |
| Q9BRG2 | SH2D3A   | TSSDPVLLK                          | S180      | 0.2636493  | 1.20434639 | 0.60212177 |
| Q9H788 | SH2D4A   | TLSSAQEDIIR                        | S315      | 0.69355575 | 1.04328742 | 0.85860808 |
| Q7L8J4 | SH3BP5L  | ETPQGLRPEVVEDEVPRSPVAEEPGGGSSSSEAK | S30       | 0.30378434 | 0.60181684 | 0.63144863 |
| Q99961 | SH3G1L   | IAASSFR                            | S288      | 0.51846945 | 1.48326031 | 0.76061048 |
| Q96B97 | SH3KBP1  | SIEVENDFLPVEK                      | S230      | 0.03104368 | 0.7551876  | 0.40879194 |
| Q96B97 | SH3KBP1  | ANSPSLFTGEGKPK                     | S587      | 0.11974345 | 1.63707354 | 0.51002233 |
| Q15464 | SHB      | HGSPFCGILGER                       | S388      | 0.06288845 | 0.78317508 | 0.45900028 |
| P29353 | SHC1     | ELFDDPSYVNVQNLDK                   | Y427      | 0.01375855 | 0.61153365 | 0.36591793 |
| Q8NEM2 | SHCBP1   | GLFQDESDSCDCSYR                    | S42       | 0.18797439 | 0.73953696 | 0.56058734 |
| Q2M3G4 | SHROOM1  | WCFSEPGK                           | S224      | 0.15529938 | 0.80266648 | 0.53741649 |
| Q8TF72 | SHROOM3  | TVTSTSTSGNDFEETK                   | S816      | 0.05041736 | 0.65455116 | 0.44612288 |
| Q8TF72 | SHROOM3  | EDSLPEESSAPDFANLK                  | S1441     | 0.17275011 | 1.19316843 | 0.54743796 |
| Q8TF72 | SHROOM3  | DRPGSPESPLLDAPFSR                  | S910      | 0.23688858 | 1.27360551 | 0.58536202 |
| Q8TF72 | SHROOM3  | SMSAEDLLER                         | S1219     | 0.48004634 | 0.83307942 | 0.74052465 |
| Q8TF72 | SHROOM3  | ERPSSWSSLDQK                       | S402      | 0.53494521 | 1.11234206 | 0.76972936 |
| Q9Y2K2 | SIK3     | QLSADSAEAHSLNVNR                   | S808      | 0.12965913 | 0.66184826 | 0.5125107  |
| Q965T3 | SIN3A    | YMNSDTSPELR                        | T1111     | 0.21554604 | 1.29840849 | 0.58136831 |
| Q96FS4 | SIPA1    | TEFLHSQNSLSR                       | S839      | 0.74795788 | 0.97316822 | 0.88634115 |
| Q43166 | SIPA1L1  | SETGDSSIFR                         | S288      | 0.12218001 | 0.83164345 | 0.5105605  |
| Q43166 | SIPA1L1  | SKSETGDSSIFR                       | S288      | 0.24544621 | 1.28253381 | 0.58971922 |
| Q43166 | SIPA1L1  | TLSDSEIYNSQR                       | S1585     | 0.63565227 | 1.02437418 | 0.82786202 |
| Q43166 | SIPA1L1  | LIDLESPTPESQK                      | S1549     | 0.84081088 | 0.97478613 | 0.93058509 |
| Q60292 | SIPA1L3  | TTPTMSEEPPLDLTGK                   | T1703     | 0.08801587 | 0.81660166 | 0.4960359  |
| Q60292 | SIPA1L3  | TTPTMSEEPPLDLTGK                   | T1702     | 0.28216251 | 1.28552071 | 0.61676369 |
| Q60292 | SIPA1L3  | AHSLGGLDPAFTSTEDLNCK               | S401      | 0.44085584 | 1.18437892 | 0.72100919 |
| Q60292 | SIPA1L3  | SSSEITLSECAEDAGEPR                 | S171      | 0.61364619 | 0.87616297 | 0.8156665  |
| Q60292 | SIPA1L3  | EVSPAPAVAGQSK                      | S1364     | 0.93966089 | 1.01335822 | 0.97418985 |
| Q96EB6 | SIRT1    | SPGEPGGAAPER                       | S47       | 0.18005635 | 1.19702304 | 0.55295852 |
| Q8IX90 | SKA3     | SPQLSDFGLER                        | S155      | 0.11281578 | 0.78009259 | 0.51002233 |
| Q8IX90 | SKA3     | NSVHEQAINSDPELNCENCFQK             | S119      | 0.30736008 | 0.57410588 | 0.63518947 |
| Q15477 | SKIV2L   | ASSLEDLVK                          | S256      | 0.00491353 | 1.1762142  | 0.29204389 |
| Q15477 | SKIV2L   | GDTVASAPCSAPLAR                    | S245      | 0.26171638 | 1.13256482 | 0.60088416 |
| Q14493 | SLBP     | CDGDASPPSPAR                       | S20,S23   | 0.90883487 | 0.97452748 | 0.96085522 |
| P55011 | SLC12A2  | EPFEDGFANGEESTPTR                  | T266      | 0.9051386  | 1.01648332 | 0.95963537 |
| Q9UP95 | SLC12A4  | LESLSDEEDESAAGADK                  | S967      | 0.62857476 | 0.89638379 | 0.82322298 |
| Q15427 | SLC16A3  | NGEVVHTPETS                        | S464      | 0.06924251 | 0.82005672 | 0.4637455  |
| Q15758 | SLC1A5   | STEPELIQVK                         | T494      | 0.43806785 | 1.11436673 | 0.71992276 |
| Q8WUM9 | SLC20A1  | CSPSESPLMEK                        | S265      | 0.01362796 | 3.01697543 | 0.36591793 |
| Q08357 | SLC20A2  | EGALSRVDESLSK                      | S256      | 0.01897173 | 2.15828794 | 0.37230658 |
| Q08357 | SLC20A2  | EGALSRVDESLSK                      | S256,S259 | 0.57792306 | 0.92894462 | 0.7967435  |
| Q08357 | SLC20A2  | ALSMTHGSVK                         | S316      | 0.62139543 | 0.91802385 | 0.82055737 |
| Q14542 | SLC29A2  | AELLQSDENGIPSSPQK                  | S252      | 0.02048861 | 0.1480709  | 0.37949754 |
| P11166 | SLC2A1   | TPEELFHPLGADSQV                    | S490      | 0.05261374 | 0.47464866 | 0.44612288 |
| Q9ULF5 | SLC39A10 | LNETELTDLEGQCESPPK                 | S591      | 0.65768032 | 1.0723192  | 0.84030158 |
| Q13433 | SLC39A6  | YESQLSTNEEK                        | S478      | 0.43817844 | 0.86438525 | 0.71992276 |
| Q96NT5 | SLC46A1  | ADPHLEFQFPQSP                      | S458      | 0.80125775 | 0.98015245 | 0.91398245 |
| Q9BWU0 | SLC4A1AP | ETQTHENMSQLSEEEQNK                 | S712      | 0.27268779 | 1.14180207 | 0.60684527 |
| Q9BWU0 | SLC4A1AP | SLQEEQSRPPTAVSSPGGPAR              | S144      | 0.68488635 | 1.16965612 | 0.85273769 |
| Q9BWU0 | SLC4A1AP | MLGEDSDEEEEMDTSER                  | S312      | 0.82859482 | 1.03261803 | 0.92537257 |
| P04920 | SLC4A2   | RRPGASPTGETPTIEEGEEDDEASEAEGAR     | T120      | 0.0169041  | 0.45816229 | 0.36631449 |
| P04920 | SLC4A2   | RRPGASPTGETPTIEEGEEDDEASEAEGAR     | S113      | 0.04767854 | 0.46858981 | 0.44612288 |
| P04920 | SLC4A2   | RRPGASPTGETPTIEEGEEDDEASEAEGAR     | S132      | 0.08644654 | 0.44352148 | 0.49557355 |
| P04920 | SLC4A2   | TSPSSAPLPHQEATPR                   | S173      | 0.10003581 | 0.55139428 | 0.5018786  |
| Q9Y6M7 | SLC4A7   | EDGRESPSYDTPSQR                    | S84       | 0.61303072 | 1.05838041 | 0.81560563 |
| Q9Y6M7 | SLC4A7   | SFADIGK                            | S233      | 0.88350848 | 1.04762112 | 0.94753935 |
| Q9UPY5 | SLC7A11  | LPSLGNK                            | S26       | 0.13693246 | 1.32899743 | 0.52339351 |
| Q01650 | SLC7A5   | SADGSAPAGEGEGVTLQR                 | S31       | 0.15536956 | 1.31173871 | 0.53741649 |
| Q96CW6 | SLC7A6OS | SAEPAEALVLACK                      | S16       | 0.19631959 | 1.43331495 | 0.56846559 |
| P19634 | SLC9A1   | CLSDPGPHPEPGEPPFPK                 | S796      | 0.17606655 | 0.85725191 | 0.55037859 |
| P19634 | SLC9A1   | ETSSPGTDDVFTAPSDSPSSQR             | S785      | 0.40549786 | 1.16276124 | 0.6993632  |

|        |           |                                      |           |            |            |            |
|--------|-----------|--------------------------------------|-----------|------------|------------|------------|
| P19634 | SLC9A1    | ETSSPGTDDVFTPA PSDSPSSQR             | S783      | 0.40767507 | 1.13606146 | 0.70014585 |
| P19634 | SLC9A1    | IGSDPLAYEPK                          | S703      | 0.814822   | 1.03052147 | 0.91990355 |
| O14745 | SLC9A3R1  | SASSDTSEELNSQD SPK                   | S290      | 0.67024722 | 1.06212664 | 0.84658851 |
| O14745 | SLC9A3R1  | EALAEAALES PRPALVR                   | S280      | 0.9740719  | 1.00749447 | 0.9878516  |
| Q96783 | SLC9A7    | SSSEEVLER                            | S694      | 0.02789388 | 0.82369936 | 0.40710444 |
| Q68D06 | SLFN13    | YNLINEGSPSPK                         | S170      | 0.50393714 | 0.94580584 | 0.75298806 |
| Q9NWH9 | SLTM      | SPGHMVILDQTK                         | S553      | 0.17472654 | 1.19311963 | 0.548315   |
| Q9NWH9 | SLTM      | DGQDAIAQSPK                          | S289      | 0.35925038 | 1.10257817 | 0.67026935 |
| Q8IY92 | SLX4      | SPGLLDTPIR                           | S1469     | 0.95098335 | 0.98549722 | 0.97921235 |
| P51532 | SMARCA4   | KIPDPDSDVSEVDAR                      | S695      | 0.45620864 | 1.24187991 | 0.72561974 |
| P51532 | SMARCA4   | EVDYSDSLEK                           | S1382     | 0.51589793 | 1.18321392 | 0.75941066 |
| O60264 | SMARCA5   | QNLLSVGDYR                           | S137      | 0.47696649 | 0.79090845 | 0.73801698 |
| Q9H4L7 | SMARCAD1  | KASISYFK                             | S79       | 0.64748628 | 1.09426938 | 0.83318338 |
| Q9NZC9 | SMARCAL1  | KPEEMTACPGHSPR                       | S112      | 0.63954116 | 1.06480453 | 0.83055345 |
| Q92922 | SMARCC1   | KHSPSPPTPTESR                        | S328      | 0.05340525 | 1.38970321 | 0.44612288 |
| Q8TAQ2 | SMARCC2   | TLTDEVNSPDSRR                        | S283      | 0.22867141 | 1.09649123 | 0.58267075 |
| Q8TAQ2 | SMARCC2   | DMDESPVPNVVEVTLPK                    | S347      | 0.45897411 | 1.12272727 | 0.72770675 |
| Q8TAQ2 | SMARCC2   | TLTDEVNSPDSR                         | S283      | 0.65407499 | 0.92910061 | 0.8383178  |
| Q8TAQ2 | SMARCC2   | GGTMTDLDEQEDESMTGKDEDENSTGNK         | S399      | 0.72778988 | 1.12082334 | 0.87523758 |
| Q92925 | SMARCC2   | AEGDSAGTAGTPGGTPAGDK                 | T217      | 0.57588151 | 1.13109726 | 0.7967435  |
| Q9UQE7 | SMC3      | KGDVEGQSQDEGEGSGESER                 | S1067     | 0.05314668 | 1.37396122 | 0.44612288 |
| Q9NTJ3 | SMC4      | TESPATAETAASEELNDR                   | T39       | 0.50212867 | 1.12890205 | 0.75168596 |
| Q9NTJ3 | SMC4      | REEGPPSPDGASSDAEPEPPSGR              | S27       | 0.62788639 | 0.91893181 | 0.8230644  |
| Q9NTJ3 | SMC4      | TESPATAETAASEELNDR                   | S41       | 0.64209119 | 1.09573241 | 0.83055345 |
| Q9NTJ3 | SMC4      | EEGPPSPDGASSDAEPEPPSGR               | S28       | 0.68484412 | 0.90910678 | 0.85273769 |
| Q9NTJ3 | SMC4      | EEGPPSPDGASSDAEPEPPSGR               | S27       | 0.8287047  | 0.97319413 | 0.92537257 |
| Q92540 | SMG7      | SPPHSGFQQYQADASK                     | S781      | 0.17340916 | 0.74742534 | 0.54778823 |
| Q8ND04 | SMG8      | NESSAPPDSDADK                        | S668      | 0.83075545 | 1.02807624 | 0.92573993 |
| Q9HOW8 | SMG9      | EPGSGGPNLSGPGGR                      | S32       | 0.49654196 | 1.06917756 | 0.74981346 |
| B2RUZ4 | SMIM1     | DGVSGLAVSSTEEASR                     | T29       | 0.6877169  | 1.12766179 | 0.85494209 |
| Q16637 | SMN1;SMN2 | GTGQSDSDIWD TALIK                    | S31       | 0.19177623 | 0.59896412 | 0.5651429  |
| Q16637 | SMN1;SMN2 | GTGQSDSDIWD TALIK                    | S28       | 0.31484335 | 0.83299683 | 0.63799287 |
| P53814 | SMTN      | TTSPEQESPTLPSTEGQVNVK                | S245      | 0.21598359 | 1.1009772  | 0.58136831 |
| O00161 | SNAP23    | TTWGDGGENSPCNVSK                     | S110      | 0.14659048 | 0.91178597 | 0.53170891 |
| Q8TAD8 | SNIP1     | RPDHSGGSPPTSEPAR                     | S49,S54   | 0.06640559 | 1.28028124 | 0.46295119 |
| Q8TAD8 | SNIP1     | RPDHSGGSPPTSEPAR                     | S52       | 0.11063832 | 1.24555904 | 0.51002233 |
| Q8TAD8 | SNIP1     | QERLSPEVAPPAHR                       | S35       | 0.16135541 | 1.2873044  | 0.54196083 |
| Q8TAD8 | SNIP1     | LSPEVAPPAHR                          | S35       | 0.46757203 | 0.93598765 | 0.73186198 |
| Q8TAD8 | SNIP1     | KDDEDEEEEEVS DS                      | S396      | 0.59659893 | 0.62704153 | 0.8075237  |
| Q8TAD8 | SNIP1     | RPDHSGGSPPTSEPAR                     | S52,S54   | 0.8686168  | 1.01777349 | 0.94253542 |
| O75643 | SNRNP200  | EEASDDMMEGD EAVVR                    | S225      | 0.95210337 | 1.00826233 | 0.97942777 |
| Q8VVK2 | SNRNP27   | VDGVSNAVAINVSQK                      | S132      | 0.25020269 | 1.31173083 | 0.59462574 |
| P08621 | SNRNP70   | GGGGDMAEPSEAGDAPPDDGPPGELGPDGDPGPEEK | S320      | 0.08543541 | 0.75988566 | 0.49393301 |
| P08621 | SNRNP70   | YDERPGSPPLPHR                        | S226      | 0.35346435 | 1.12297541 | 0.66702539 |
| P08621 | SNRNP70   | GGGGQDNGLEGLGNSDR                    | S410      | 0.77457063 | 0.94776119 | 0.89980729 |
| P09661 | SNRPA1    | GGPSPGDVEAIK                         | S197      | 0.77608242 | 1.0374561  | 0.9005906  |
| Q13884 | SNTB1     | GSPVSEIGWETPPSPR                     | S219      | 0.155646   | 1.31148605 | 0.53741649 |
| Q13884 | SNTB1     | GAGAGHPGAGGAQPPD SPAGVR              | S87       | 0.83437457 | 0.966      | 0.92778088 |
| Q13425 | SNTB2     | SPSLGSDLTFATR                        | S393      | 0.4339678  | 0.78622242 | 0.71865424 |
| Q13425 | SNTB2     | PGAGEAGASPPVR                        | S110      | 0.70174921 | 1.03195876 | 0.86274503 |
| O95149 | SNUPN     | LAEDDWTGMESEENK                      | S75       | 0.06192383 | 0.78133794 | 0.45713107 |
| Q13573 | SNW1      | GPPSPPAPVMHSPSRK                     | S224,S234 | 0.07045861 | 1.31163629 | 0.46523029 |
| Q13573 | SNW1      | GPPSPPAPVMHSPSR                      | S224,S232 | 0.41910121 | 0.8583691  | 0.709009   |
| Q15036 | SNX17     | SPPLLESPDATR                         | S421      | 0.03935621 | 0.53358395 | 0.43108921 |
| Q15036 | SNX17     | SPPLLESPDATR                         | S415      | 0.430738   | 0.91046778 | 0.71568235 |
| O60749 | SNX2      | SMSAPVIFDR                           | S119      | 0.16275404 | 1.49864441 | 0.54196083 |
| Q9Y343 | SNX24     | AESCGSFDTESEESSK                     | S116      | 0.36540888 | 1.12009238 | 0.67336704 |
| Q9Y4B5 | SOGA2     | REGPVGGESDSEEMFEK                    | S776      | 0.2936499  | 1.2888504  | 0.62281368 |
| Q9Y4B5 | SOGA2     | EGPVGGESDSEEMFEK                     | S778      | 0.43087873 | 0.89488282 | 0.71568235 |
| P18583 | SON       | EMEHNTVCAAGTSPVGEIGEEK               | S1556     | 0.02956734 | 1.14685315 | 0.40811311 |
| P18583 | SON       | SHDDGNIDLESDFLK                      | S154      | 0.10121898 | 0.60754248 | 0.5018786  |
| P18583 | SON       | ESDQTLAALLSPK                        | S1697     | 0.41808225 | 0.95162591 | 0.70874058 |
| P18583 | SON       | SAASPVVSSMPER                        | S1769     | 0.79348908 | 1.01796407 | 0.91095934 |
| P18583 | SON       | EMEHNTVCAAGTSPVGEIGEEK               | T1555     | 0.97689695 | 0.99350854 | 0.98883833 |
| O60504 | SORBS3    | SPADPIDLGGQTSRR                      | T562      | 0.34685243 | 1.26861298 | 0.66293814 |
| O60504 | SORBS3    | LCDDGPQLTSPR                         | S530      | 0.76218142 | 0.96662388 | 0.89034252 |
| O60504 | SORBS3    | SPADPIDLGGQTSRR                      | S563      | 0.97232804 | 1.00466497 | 0.98687477 |
| Q07889 | SOS1      | SASVSSISLTK                          | S1134     | 0.13293225 | 0.62683064 | 0.51729728 |
| Q53LP3 | SOWAHC    | DLVMGSSPQLK                          | S213      | 0.37196357 | 1.08170107 | 0.67479745 |
| Q9UN79 | SOX13     | DLISLDSSPAK                          | S386      | 0.0444461  | 0.69278448 | 0.44293212 |
| P23497 | SP100     | LSTFRESFK                            | S394      | 0.10935771 | 1.17301751 | 0.51002233 |
| P23497 | SP100     | LPLQESEEEEREER                       | S157      | 0.16416449 | 1.11097852 | 0.54196083 |
| P23497 | SP100     | SEPVINNDNPLESNDK                     | S362      | 0.31270337 | 1.07683864 | 0.63653708 |
| P23497 | SP100     | DDSLGSQLTNEQCAQK                     | S228      | 0.44924084 | 1.25118908 | 0.72390157 |
| Q9HB58 | SP110     | DNSPEPNDPEEPQEVSTPSDK                | S256      | 0.05370048 | 1.13032638 | 0.44612288 |
| Q9HB58 | SP110     | VTQGAASPGHIQEK                       | S380      | 0.6763791  | 0.9656051  | 0.85001908 |
| Q9HB58 | SP110     | DKEDPQEMPHSPLGSMPEIR                 | S248      | 0.74295233 | 1.11640287 | 0.88278609 |
| Q9HB58 | SP110     | EDPQEMPHSPLGSMPEIR                   | S244      | 0.82004894 | 0.95056148 | 0.92370038 |
| Q02446 | SP4       | ENNVSQPASSSSSSSNNGSASPTK             | S136      | 0.20583361 | 1.17162393 | 0.57243036 |
| O60271 | SPAG9     | RSSTLSQLPGDK                         | S594      | 0.51954639 | 0.69500033 | 0.76115197 |
| O60271 | SPAG9     | LHQLSGSDQLESTAHSR                    | S183      | 0.82419569 | 0.95488026 | 0.92458845 |

|        |                         |                             |                |             |            |            |
|--------|-------------------------|-----------------------------|----------------|-------------|------------|------------|
| Q9NS25 | SPANXB1;SPANXB2;SPANXF1 | SVPCESEANEANEANK            | S13            | 0.00316458  | 3.10066891 | 0.29204389 |
| Q9NS25 | SPANXB1;SPANXB2;SPANXF1 | TMPETPTGSDPQPAPK            | T34            | 0.01860365  | 1.87753085 | 0.37230658 |
| Q9NS25 | SPANXB1;SPANXB2;SPANXF1 | RSVPCESEANEANEANK           | S13            | 0.04418727  | 1.61345794 | 0.44293212 |
| Q9NS25 | SPANXB1;SPANXB2;SPANXF1 | RTSPEELVNDHAR               | S69            | 0.49624945  | 1.2184381  | 0.74981346 |
| Q9NS25 | SPANXB1;SPANXB2;SPANXF1 | TSESTILVVR                  | S53            | 0.59423354  | 1.2924085  | 0.80647767 |
| Q69YQ0 | SPECC1L                 | KGSSGNAEVSVACLTER           | S384           | 0.3437811   | 0.89231409 | 0.66290366 |
| Q69YQ0 | SPECC1L                 | KGSSGNAEVSVACLTER           | S389           | 0.51109381  | 1.06903991 | 0.75736731 |
| Q69YQ0 | SPECC1L                 | KGSSGNAEVSVACLTER           | S384           | 0.62056433  | 1.11081712 | 0.82013131 |
| Q96T58 | SPEN                    | EDVSASGSPPEATQLAK           | S2159          | 0.02879992  | 1.29169503 | 0.40710444 |
| Q96T58 | SPEN                    | RQQSPGASPSQAER              | S736,S740      | 0.07405425  | 1.28263708 | 0.47120118 |
| Q96T58 | SPEN                    | ESGVVAVSPEK                 | S2120          | 0.14694753  | 1.19340055 | 0.53170891 |
| Q96T58 | SPEN                    | HGSFHEDEDPIGSPR             | S1268,S1278    | 0.2211964   | 0.79438315 | 0.58267075 |
| Q96T58 | SPEN                    | HGSFHEDEDPIGSPR             | S1268          | 0.50213368  | 1.12298558 | 0.75168596 |
| Q96T58 | SPEN                    | SLVHEVGKPPQDVTDDSPSK        | S1222          | 0.62582756  | 0.91489918 | 0.82174981 |
| Q08AE8 | SPIRE1                  | LRPVSPPEIR                  | S387           | 0.92353334  | 1.01046353 | 0.96716763 |
| Q7Z699 | SPRED1                  | HVSFODEDEIVR                | S238           | 0.34369709  | 0.77714182 | 0.66290366 |
| Q7Z698 | SPRED2                  | QVSPFDDDEEIVR               | S206           | 0.6017315   | 1.07359752 | 0.8111934  |
| Q13813 | SPTAN1                  | CTELNQAWSSLGK               | S1322          | 0.22587159  | 1.20871863 | 0.58267075 |
| Q13813 | SPTAN1                  | SLQQLAEEER                  | S1217          | 0.5062591   | 1.06143971 | 0.75314323 |
| Q13813 | SPTAN1                  | WRSLQQLAEER                 | S1217          | 0.61334757  | 1.08715389 | 0.81560563 |
| Q01082 | SPTBN1                  | ESSPIPSPTSDRK               | S2164,S2169    | 0.12858829  | 1.14438254 | 0.5125107  |
| Q01082 | SPTBN1                  | ESSPIPSPTSDR                | S2165,S2169    | 0.15401798  | 0.9166185  | 0.53741649 |
| Q01082 | SPTBN1                  | GEQVSQLGLPAEQGSPR           | S2138          | 0.87422869  | 1.03006329 | 0.94412246 |
| Q13501 | SQSTM1                  | SRLTPVSPSSSTEEK             | T269           | 0.01342504  | 1.55669421 | 0.36591793 |
| Q13501 | SQSTM1                  | LTPVSPSSSTEEK               | S272           | 0.09099997  | 1.28462244 | 0.49756932 |
| Q13501 | SQSTM1                  | SRLTPVSPSSSTEEK             | T269,S272      | 0.46478867  | 1.16634419 | 0.72999428 |
| Q6ZRS2 | SRCAP                   | DEEQSEADAGSGPPTGPTTLGPK     | T572           | 0.83540863  | 0.96164423 | 0.92778088 |
| Q8NEF9 | SFBP1                   | EYFDDSTEER                  | S264           | 0.134211757 | 1.04095326 | 0.52045275 |
| Q8IYB3 | SRRM1                   | RLSPSASPPR                  | S391,S393      | 0.01576666  | 1.23233422 | 0.36631449 |
| Q8IYB3 | SRRM1                   | APQTSSSPPVVR                | S694,S696      | 0.02987318  | 1.2099387  | 0.40835118 |
| Q8IYB3 | SRRM1                   | KETESEADNLLDLEK             | T872           | 0.03310374  | 1.17581543 | 0.413925   |
| Q8IYB3 | SRRM1                   | AASPSQSVR                   | S738,S740      | 0.04535803  | 1.40559006 | 0.44340907 |
| Q8IYB3 | SRRM1                   | TPELPEPSVK                  | T220           | 0.10332799  | 1.15330287 | 0.50572948 |
| Q8IYB3 | SRRM1                   | VPKPEIPEKPEPSPEK            | S260           | 0.11551763  | 2.18334712 | 0.51002233 |
| Q8IYB3 | SRRM1                   | KETESEADNLLDLEK             | S874           | 0.20842497  | 1.08922443 | 0.57419211 |
| Q8IYB3 | SRRM1                   | RYSPPPPK                    | S605,S607      | 0.26179535  | 1.12534461 | 0.60088416 |
| Q8IYB3 | SRRM1                   | HRSPPATPPP                  | T406,S402      | 0.37074986  | 1.09504132 | 0.67442469 |
| Q8IYB3 | SRRM1                   | SPSPAPPPR                   | S560,S562      | 0.38066658  | 1.18590973 | 0.67846982 |
| Q8IYB3 | SRRM1                   | RYSPIQR                     | S597           | 0.38411686  | 1.0893526  | 0.67941113 |
| Q8IYB3 | SRRM1                   | VELSEEDK                    | S463           | 0.46355806  | 0.91441441 | 0.72929075 |
| Q8IYB3 | SRRM1                   | KPPAPPSPVQSQSPSTNWSPAVPVK   | S769,S775      | 0.67367103  | 0.89261264 | 0.84926251 |
| Q8IYB3 | SRRM1                   | EKTPELPEPSVK                | T220           | 0.98504752  | 1.00223464 | 0.99242732 |
| Q8IYB3 | SRRM1                   | ETESEADNLLDLEK              | S874           | 0.98747705  | 0.99840192 | 0.99394726 |
| Q9UQ35 | SRRM2                   | QSHSGSISPYPK                | S994           | 0.00674002  | 0.89951409 | 0.31708848 |
| Q9UQ35 | SRRM2                   | QGSITSQANEQSVTPQRR          | T866           | 0.03126527  | 1.33629465 | 0.40879194 |
| Q9UQ35 | SRRM2                   | QGSITSQANEQSVTPQR           | S857           | 0.03804845  | 1.31626506 | 0.43108921 |
| Q9UQ35 | SRRM2                   | SSSPVTELASRSPIR             | S1103,S1112    | 0.03840596  | 1.16086236 | 0.43108921 |
| Q9UQ35 | SRRM2                   | SRTPPSAPSQSR                | S2407          | 0.06111924  | 1.40929705 | 0.45713107 |
| Q9UQ35 | SRRM2                   | SRTSPAPWK                   | S1857          | 0.06192136  | 1.3017094  | 0.45713107 |
| Q9UQ35 | SRRM2                   | QGSITSQANEQSVTPQR           | T866,S857      | 0.06666722  | 0.83750292 | 0.46315453 |
| Q9UQ35 | SRRM2                   | LPQSSSESSPPSQPTK            | S424           | 0.14138059  | 0.76542349 | 0.52770768 |
| Q9UQ35 | SRRM2                   | SGSSQELDVKPSASPQER          | S1541          | 0.15610188  | 1.24767999 | 0.53741649 |
| Q9UQ35 | SRRM2                   | ELSNSPLR                    | S1320          | 0.15699306  | 0.90635697 | 0.53741649 |
| Q9UQ35 | SRRM2                   | THTTALAGRSPPASGR            | S295,S297      | 0.16255645  | 1.12545395 | 0.54196083 |
| Q9UQ35 | SRRM2                   | RGEGDAPFSEPGTTSTQRPPSPETATK | S323           | 0.16326639  | 1.22603902 | 0.54196083 |
| Q9UQ35 | SRRM2                   | SVSPCSNVESR                 | S954           | 0.16458781  | 1.1700345  | 0.54196083 |
| Q9UQ35 | SRRM2                   | SLSGSSPCPK                  | S778           | 0.1670301   | 1.37697161 | 0.54315766 |
| Q9UQ35 | SRRM2                   | SRTPPSAPSQSR                | T2409          | 0.18730285  | 1.29849254 | 0.56058734 |
| Q9UQ35 | SRRM2                   | MALPPQEDATASPPR             | S1179          | 0.20509793  | 1.21166307 | 0.57194083 |
| Q9UQ35 | SRRM2                   | GEFSASPMKL                  | S1124          | 0.21283271  | 1.16569637 | 0.57940788 |
| Q9UQ35 | SRRM2                   | SSSPVTELASR                 | S1102,S1103    | 0.21601281  | 0.78511119 | 0.58136831 |
| Q9UQ35 | SRRM2                   | TSPLLLDR                    | S2398          | 0.22002651  | 1.12797375 | 0.58267075 |
| Q9UQ35 | SRRM2                   | AQTPPGPPLSGSK               | T1003          | 0.22074555  | 1.12996255 | 0.58267075 |
| Q9UQ35 | SRRM2                   | SLSYSPVER                   | S2692          | 0.22888184  | 0.74457324 | 0.58267075 |
| Q9UQ35 | SRRM2                   | RGEGDAPFSEPGTTSTQRPPSPETATK | T328           | 0.24187812  | 1.15992812 | 0.58886046 |
| Q9UQ35 | SRRM2                   | QGSITSQANEQSVTPQRR          | T866,S857      | 0.24680333  | 1.1362069  | 0.591961   |
| Q9UQ35 | SRRM2                   | GEGDAPFSEPGTTSTQRPPSPETATK  | S323           | 0.25265821  | 1.09198656 | 0.59589813 |
| Q9UQ35 | SRRM2                   | SSGHSSSELSPDAVEK            | S1384,S1387    | 0.2657927   | 0.81843575 | 0.60298408 |
| Q9UQ35 | SRRM2                   | SSGHSSSELSPDAVEK            | S1382          | 0.27169301  | 1.2071596  | 0.60614221 |
| Q9UQ35 | SRRM2                   | SPVPSAFSDQSR                | S2449          | 0.30607485  | 0.85876011 | 0.63401508 |
| Q9UQ35 | SRRM2                   | SLSGSSPCPK                  | S780           | 0.3170716   | 1.16171572 | 0.63849749 |
| Q9UQ35 | SRRM2                   | SSGHSSSELSPDAVEK            | S1387,S1378    | 0.3177943   | 0.75860298 | 0.6389963  |
| Q9UQ35 | SRRM2                   | ENSFSGPLEFR                 | S1329          | 0.33316105  | 0.90059473 | 0.65495281 |
| Q9UQ35 | SRRM2                   | SSSPVTELASR                 | S1103          | 0.35727854  | 0.93493661 | 0.66868863 |
| Q9UQ35 | SRRM2                   | HGGSPQPLATTPLSQEPVNPPEASPTR | T400,S377      | 0.3693959   | 1.15958222 | 0.67368198 |
| Q9UQ35 | SRRM2                   | SSGHSSSELSPDAVEK            | S1387          | 0.38275646  | 0.90643564 | 0.67941113 |
| Q9UQ35 | SRRM2                   | CRSPGMLEPLGSSR              | S2132          | 0.3908357   | 1.55557469 | 0.68730666 |
| Q9UQ35 | SRRM2                   | SGSSQELDVKPSASPQER          | S1542          | 0.46042957  | 1.14842819 | 0.72775395 |
| Q9UQ35 | SRRM2                   | AIISPR                      | S924           | 0.4823742   | 1.09880372 | 0.74124365 |
| Q9UQ35 | SRRM2                   | QGSITSQANEQSVTPQR           | T866           | 0.59384312  | 0.92845165 | 0.80647767 |
| Q9UQ35 | SRRM2                   | HGGSPQPLATTPLSQEPVNPPEASPTR | T383,T400,S377 | 0.59480335  | 0.91466667 | 0.80657235 |

|         |         |                                               |             |            |            |            |
|---------|---------|-----------------------------------------------|-------------|------------|------------|------------|
| Q9UQ35  | SRRM2   | TPPVALNSSR                                    | T2104       | 0.60970779 | 1.04410851 | 0.81484419 |
| Q9UQ35  | SRRM2   | SCFESSDPPELK                                  | S876        | 0.75188903 | 1.02271139 | 0.88774061 |
| Q9UQ35  | SRRM2   | HGGSPQPLATTPLSQEPVNPPEASPTR                   | S387,S395   | 0.79669399 | 0.94949495 | 0.91333498 |
| Q9UQ35  | SRRM2   | SRSPLAIR                                      | S2046       | 0.82334523 | 1.04803573 | 0.92458845 |
| Q9UQ35  | SRRM2   | SSSPVTELASR                                   | S1101,S1103 | 0.92619437 | 0.9878271  | 0.96756561 |
| Q9UQ35  | SRRM2   | SGSSQELDVKPSASPQER                            | S1541,S1552 | 0.95044182 | 0.98774409 | 0.97916383 |
| Q9UQ35  | SRRM2   | SPGMLEPLGSSR                                  | S2132       | 0.98099316 | 1.00223964 | 0.99052277 |
| Q9BXP5  | SRRT    | ERFSPRR                                       | S67         | 0.26791636 | 0.89531124 | 0.60403212 |
| Q07955  | SRSF1   | VDGPRSPSYGR                                   | S199        | 0.05662862 | 2.72380952 | 0.45298462 |
| Q75494  | SRSF10  | SRSFDYNYR                                     | S133        | 0.26595408 | 0.84773045 | 0.60298408 |
| Q75494  | SRSF10  | SFDYNYR                                       | S133        | 0.36706419 | 0.80041634 | 0.67368198 |
| Q05519  | SRSF11  | VNGDDHHEEDMDMSD                               | S483        | 0.00483724 | 1.37570477 | 0.29204389 |
| Q05519  | SRSF11  | DYDEEEQGYDSEK                                 | S434        | 0.65540231 | 0.85829596 | 0.8394813  |
| Q13243  | SRSF5   | LIVENLSSR                                     | S117        | 0.11892161 | 1.46329977 | 0.51002233 |
| Q13242  | SRSF9   | GSPHYFSPFRPY                                  | S211        | 0.07240289 | 0.67778505 | 0.46528233 |
| P05455  | SSB     | FASDDEHDEHDENGATGPVK                          | S366        | 0.66655866 | 1.07459016 | 0.84491876 |
| P28290  | SSFA2   | SLASIEAK                                      | S668        | 0.54349632 | 0.90919565 | 0.77269004 |
| P28290  | SSFA2   | MPSFPR                                        | S1040       | 0.98061292 | 0.9965221  | 0.99052277 |
| Q8WYL5  | SSH1    | KLEFGSPK                                      | S576        | 0.74208607 | 0.96261356 | 0.88208167 |
| Q8TE77  | SSH3    | APSEELHGDQDTDFGQGSQPQK                        | S87         | 0.06151116 | 1.19230142 | 0.45713107 |
| Q9UNL2  | SSR3    | QQSEEDLLLQDFSR                                | S11         | 0.30834141 | 1.32822165 | 0.63577254 |
| Q08945  | SSRP1   | EGMNPYSDEYADSDEDQHDAYLER                      | S444        | 0.38189702 | 0.32737678 | 0.67941113 |
| P50502  | ST13    | ADEPSSEESDLEIDK                               | S75,S79     | 0.05085267 | 0.62155422 | 0.44612288 |
| P50502  | ST13    | ADEPSSEESDLEIDK                               | S79         | 0.09412415 | 0.85216473 | 0.5018786  |
| P50502  | ST13    | ADEPSSEESDLEIDK                               | S76,S79     | 0.19584509 | 0.5103061  | 0.56792296 |
| Q9Y365  | STARD10 | MGGAGGEGSDDDTSLT                              | S284        | 0.24990271 | 1.56708914 | 0.5945986  |
| Q9Y3M8  | STARD13 | KGDDSDDEEDLCISNK                              | S133        | 0.46411592 | 0.70374485 | 0.72954618 |
| Q95793  | STAU1   | VTFPEPGSGDENGTSNK                             | S390        | 0.21708609 | 1.08924378 | 0.58142167 |
| Q9NUL3  | STAU2   | GSSPTPPCSPVQPSK                               | S486        | 0.48562705 | 0.9078234  | 0.74248003 |
| Q95210  | STBD1   | HSSWGDVGVGGSLK                                | S211        | 0.08926713 | 1.69579791 | 0.4960359  |
| Q95210  | STBD1   | NESLESPMGWGFQK                                | S145        | 0.9701991  | 0.98261153 | 0.98671573 |
| Q13586  | STIM1   | AEQSLHDLQER                                   | S257        | 0.08011135 | 1.97968611 | 0.48762117 |
| Q13586  | STIM1   | SHSPSPDPDTPSPVGDSDR                           | S618        | 0.08620939 | 0.72429263 | 0.49557355 |
| Q13586  | STIM1   | SHSPSPDPDTPSPVGDSDR                           | S620        | 0.29335292 | 0.91466306 | 0.62260296 |
| Q9P246  | STIM2   | SIVPSPQPQR                                    | S523        | 0.04475804 | 1.78387847 | 0.44293212 |
| Q94804  | STK10   | QVAEQGGDLSPAANR                               | S438        | 0.11838281 | 1.1574718  | 0.51002233 |
| Q94804  | STK10   | LSEEAECNPSTPSK                                | T952        | 0.20677971 | 0.78481807 | 0.57287379 |
| Q8N1F8  | STK11IP | NSPPQAPSTR                                    | S772        | 0.13666424 | 1.15439094 | 0.52306923 |
| Q8N1F8  | STK11IP | RASISEPSDTPPEPR                               | S398        | 0.59993999 | 1.06903766 | 0.80979348 |
| Q13188  | STK3    | ELEEEENDEDELDSHTMVK                           | S316        | 0.26851838 | 0.38856628 | 0.60403212 |
| Q9UEW8  | STK39   | TEDGDWWEWSDEMDEK                              | S385        | 0.42811848 | 0.67426204 | 0.7137923  |
| P16949  | STMN1   | DLSEIEIQK                                     | S46         | 0.15463709 | 1.14015184 | 0.53741649 |
| P16949  | STMN1   | ESVPEFPLSPPK                                  | S38         | 0.50570485 | 0.8539823  | 0.75314323 |
| Q5VSL9  | STRIP1  | AASPPASADLIEQQQK                              | S335        | 0.02804794 | 1.19832461 | 0.40710444 |
| Q5VSL9  | STRIP1  | KDSEGYSESPLEFEYADTDK                          | S59         | 0.34668711 | 0.35011409 | 0.66293814 |
| Q13033  | STRN3   | NLEQLNGGESPK                                  | S229        | 0.13903148 | 1.1432319  | 0.52583497 |
| Q9NRL3  | STRN4   | SLELNGAVEPSEGAPR                              | S206        | 0.37595129 | 0.83680184 | 0.67604172 |
| Q8TCJ2  | STT3B   | ENPPVEDSSDEDDK                                | S498        | 0.17556023 | 1.13062099 | 0.54980155 |
| Q8TCJ2  | STT3B   | RENPPVEDSSDEDDK                               | S498        | 0.54051603 | 0.86809931 | 0.7718622  |
| Q9UNE7  | STUB1   | LGAGGGSPKPSAQELK                              | S19,S23     | 0.16523661 | 1.25542237 | 0.54308896 |
| Q043752 | STX6    | QALLGDSGQNWSTGTTDK                            | S129        | 0.0518946  | 1.77251805 | 0.44612288 |
| Q9H7L9  | SUDS3   | RPASPPSEHLPATPAESPAQR                         | S234,S237   | 0.85456942 | 0.96542959 | 0.93683196 |
| Q8IWZ8  | SUGP1   | DVDASPSPLSVQDLK                               | S411        | 0.76860982 | 0.95840291 | 0.89546237 |
| Q8IWZ8  | SUGP1   | DVDASPSPLSVQDLK                               | S409        | 0.86028245 | 1.0367269  | 0.93886034 |
| Q8IX01  | SUGP2   | KMSFDI0K                                      | S315        | 0.51367373 | 1.30127706 | 0.75868535 |
| Q15527  | SURF2   | DLGSTEDGDGTDFFLTKDEK                          | T195        | 0.22992556 | 1.35463918 | 0.58267075 |
| Q15527  | SURF2   | DLGSTEDGDGTDFFLTK                             | T195        | 0.44344648 | 0.84721629 | 0.72238826 |
| Q15527  | SURF2   | DLGSTEDGDGTDFFLTK                             | T190        | 0.94436272 | 1.01023891 | 0.9777003  |
| Q9H5I1  | SUV39H2 | GSGDISSDSIDHSPAK                              | S388        | 0.06450311 | 0.66183311 | 0.46076126 |
| Q15022  | SUZ12   | ASMSEFLESEDEGEVQQR                            | S546        | 0.34841168 | 0.63608912 | 0.6638961  |
| Q95425  | SVIL    | YGSFEAEASYPILNR                               | S968        | 0.20438176 | 0.64643191 | 0.57194083 |
| Q95425  | SVIL    | SFDEQNVPK                                     | S707        | 0.35231404 | 1.13120131 | 0.66702539 |
| Q95425  | SVIL    | DSSFTEVPRSPK                                  | S245        | 0.47451812 | 1.05575117 | 0.73608495 |
| Q95425  | SVIL    | CTSHSETPTVDDEEK                               | S673        | 0.73696989 | 0.93745313 | 0.87956524 |
| Q95425  | SVIL    | CTSHSETPTVDDEEK                               | T672        | 0.75351469 | 1.06571525 | 0.88807985 |
| Q95425  | SVIL    | FSSSIENS DSPVR                                | S914        | 0.89648373 | 1.03961221 | 0.95573579 |
| Q96A49  | SYAP1   | TPPVVVK                                       | T248        | 0.23905188 | 1.09210526 | 0.58659409 |
| Q92797  | SYMPK   | TPSPAEDAREPEAK                                | S1259       | 0.06365399 | 1.28357582 | 0.46076126 |
| Q92797  | SYMPK   | EERSPQTLAPVGEDAMK                             | S1243       | 0.06810146 | 1.18836915 | 0.4637455  |
| Q92797  | SYMPK   | SPQTLAPVGEDAMK                                | S1243       | 0.68658161 | 0.92787476 | 0.85418907 |
| Q8WXH0  | SYNE2   | QQSVESLAEVVK                                  | S2781       | 0.11766641 | 1.19765332 | 0.51002233 |
| Q8WXH0  | SYNE2   | EASENETDMEDPR                                 | S6361       | 0.75942639 | 1.04370921 | 0.88966056 |
| Q9UM22  | SYNRG   | EEASPVPLTNSVGTVK                              | S720        | 0.04515472 | 1.39706024 | 0.44340907 |
| Q9UM22  | SYNRG   | QLSLEGGSLGVEDLK                               | S752        | 0.26519041 | 0.65306736 | 0.60298408 |
| Q9UM22  | SYNRG   | SGSLDDSFDFQELPASSK                            | S473        | 0.34574909 | 0.68212006 | 0.66293814 |
| Q9UM22  | SYNRG   | ETSFSSENITMTLSLK                              | S935        | 0.51670998 | 1.06115773 | 0.75941066 |
| Q8IYJ3  | SYTL1   | ASDPEEASQAQEDPQQGQVCAEEADPELEPASGGEQPRPQQAQTK | S199        | 0.05887549 | 1.60036649 | 0.45298462 |
| Q8IYJ3  | SYTL1   | VPPSPDDLPSR                                   | S392        | 0.06744724 | 1.29071557 | 0.4637455  |
| Q8TDW5  | SYTL5   | SPGAEVQSSEQTR                                 | S147        | 0.33849378 | 1.25117332 | 0.65781985 |
| Q7Z422  | SZRD1   | ILGSAPEEEQEKPIILDRPTR                         | S107        | 0.26777056 | 1.69868637 | 0.60403212 |
| Q75410  | TACC1   | GGAAGEDAEAGGPEGDPPEEDSQAETK                   | S44         | 0.55606933 | 0.95778938 | 0.78182069 |



|        |          |                                    |             |            |            |            |
|--------|----------|------------------------------------|-------------|------------|------------|------------|
| 095359 | TACC2    | LDNTPASPPRSPAEPNDIPIAK             | S2317,S2321 | 0.03184547 | 1.31013306 | 0.40879194 |
| 095359 | TACC2    | MSESPTPCSGSSFEETEALVNTAAK          | S2567       | 0.20077532 | 0.58733517 | 0.56975265 |
| Q9Y6A5 | TACC3    | ILSPSMASK                          | S71         | 0.18615351 | 0.61165326 | 0.55994868 |
| Q9Y6A5 | TACC3    | SGCSEAQPPEPETR                     | S434        | 0.48843559 | 0.87300554 | 0.74395336 |
| Q16514 | TAF12    | LSPENNQVLTK                        | S51         | 0.77855217 | 0.98221006 | 0.90280708 |
| Q6P1X5 | TAF2     | DKEPFTFSSPASGR                     | S1185       | 0.5716021  | 1.24066707 | 0.79243162 |
| Q15545 | TAF7     | LNESDEQHQENEGTNQLVMGIQK            | S264        | 0.18607204 | 0.40796903 | 0.55994868 |
| Q15545 | TAF7     | EAENQGLDISSPGMMSGHR                | S200        | 0.2708087  | 0.90816123 | 0.60553604 |
| P37802 | TAGLN2   | NFSDNQLQEGK                        | S163        | 0.17102541 | 1.28442728 | 0.54531589 |
| Q9COD5 | TANC1    | SPCETISSPSSTLESK                   | S207        | 0.23702541 | 1.10228554 | 0.58536202 |
| Q9HCD6 | TANC2    | SCDELSPVSPQTGGYPSEPTR              | S1827       | 0.44706181 | 0.89892854 | 0.72351031 |
| Q9HCD6 | TANC2    | DCSYGAVTSPTSTLESR                  | S169        | 0.76228334 | 0.97687861 | 0.89034252 |
| Q7L7X3 | TAOK1    | ASDPQSPQVSR                        | S421        | 0.8045637  | 1.0254491  | 0.91456043 |
| Q9H2K8 | TAOK3    | NGPLNESQEEDSEHGTSLNR               | S324        | 0.07108059 | 1.33481878 | 0.46528233 |
| Q4KMP7 | TBC1D10B | AAGGAPSPPPVPR                      | S678        | 0.97090554 | 0.99714693 | 0.98687477 |
| Q8TC07 | TBC1D15  | KDSSVVVEWTQAPK                     | S70         | 0.02822471 | 0.73218885 | 0.40710444 |
| Q8TC07 | TBC1D15  | NDSPTQIPVSSDVCR                    | S675        | 0.33822259 | 0.87292083 | 0.65781985 |
| Q8TBP0 | TBC1D16  | MLASPAPEDEEK                       | S155        | 0.51203146 | 0.83763385 | 0.7574445  |
| Q9BYX2 | TBC1D2   | RAVSEGCASEDEVEGEA                  | S920        | 0.00358729 | 1.95419863 | 0.29204389 |
| Q3MIIE | TBC1D25  | QASLDGLQLR                         | S506        | 0.02148105 | 1.25689908 | 0.37949754 |
| O60343 | TBC1D4   | SPSAMQQQDGLDR                      | S789        | 0.11689952 | 0.85800296 | 0.51002233 |
| O60343 | TBC1D4   | HASAPSHVQPSDSEK                    | S341        | 0.21928528 | 3.90057048 | 0.58267075 |
| Q92609 | TBC1D5   | NISSSPSVESLPGGR                    | S541        | 0.10029443 | 1.44027409 | 0.5018786  |
| Q92609 | TBC1D5   | TSSTLDSEGTFNYSR                    | S43         | 0.2394744  | 0.80471629 | 0.58659409 |
| Q92609 | TBC1D5   | SESMVPQLNK                         | S522        | 0.29196042 | 0.63974314 | 0.62260296 |
| Q92609 | TBC1D5   | EFTGSPSSATK                        | S558        | 0.49044545 | 1.07682426 | 0.74595805 |
| Q92609 | TBC1D5   | RTSSTLDSEGTFNYSR                   | S43         | 0.63555495 | 1.14310613 | 0.82786202 |
| Q66K14 | TBC1D9B  | ASVVDPSTESSAPQEGSEQPASPPLSSR       | S435        | 0.10110153 | 1.48388721 | 0.5018786  |
| Q66K14 | TBC1D9B  | KASVVDPSTESSAPQEGSEQPASPPLSSR      | S411,S439   | 0.3656072  | 0.76391957 | 0.67336704 |
| P23193 | TCEA1    | EPAITSQNSPEAR                      | S100        | 0.04141692 | 1.24789311 | 0.43680889 |
| P23193 | TCEA1    | KEPAITSQNSPEAR                     | S100        | 0.13915549 | 1.15923567 | 0.52583497 |
| Q969E4 | TCEAL3   | EDEGEPGDEGQLEDEGSQEK               | S65         | 0.06972768 | 1.87145878 | 0.4637455  |
| Q969E4 | TCEAL3   | REDEGEPGDEGQLEDEGSQEK              | S65         | 0.09733704 | 1.62709285 | 0.5018786  |
| Q969E4 | TCEAL3   | NEGNLENEGKPEDEVEPDDEGKSDEEEKPDVEGK | S30         | 0.96476052 | 1.00827967 | 0.98273364 |
| Q96E15 | TCEAL4   | EKGPEIEGKPESEGEPSSETR              | S102        | 0.09406956 | 1.16382979 | 0.5018786  |
| Q9UGU0 | TCF20    | ENDTVTISPK                         | S1522       | 0.29640138 | 1.13277119 | 0.62494294 |
| Q13428 | TCOF1    | TSQVGAASAPAKESPR                   | S381        | 0.03098688 | 0.7467761  | 0.40879194 |
| Q13428 | TCOF1    | LDSSPSVSTLAAK                      | S1228       | 0.04293379 | 1.15486381 | 0.44128756 |
| Q13428 | TCOF1    | KLGAEGGEASVSPEK                    | S1378       | 0.31876435 | 1.301566   | 0.63900857 |
| Q13428 | TCOF1    | VGPATPSAQVKG                       | T533        | 0.46098681 | 0.79116874 | 0.72827788 |
| Q13428 | TCOF1    | TSQVGAASAPAKESPR                   | S375        | 0.58228358 | 0.91229587 | 0.80001994 |
| Q13428 | TCOF1    | LGAGEGGEASVSPEK                    | S1378       | 0.70514807 | 1.04342581 | 0.86527488 |
| P17987 | TCP1     | HGSYEDAVHSGALND                    | S551        | 0.11423083 | 0.75785998 | 0.51002233 |
| Q9NYB0 | TERF2IP  | YLLGDAPVSPSSQK                     | S203        | 0.52955899 | 0.96068202 | 0.7665292  |
| Q01664 | TFAP4    | FIQELSGSSPK                        | S124        | 0.20209981 | 0.81578947 | 0.57040595 |
| Q01664 | TFAP4    | DEGIGSPDIWEDEK                     | S139        | 0.3164399  | 0.90967283 | 0.63802195 |
| Q14186 | TFDP1    | VFIDQNLSPGK                        | S23         | 0.10498675 | 0.83537415 | 0.50572948 |
| P0C126 | TFPT     | RTPAPPEPGSPAPGEGPSGR               | S180        | 0.05826483 | 1.54479721 | 0.45298462 |
| Q96RS0 | TGS1     | DRPHASGTDGDESEEDPPEHKPSK           | S412        | 0.14091624 | 1.57077121 | 0.52770768 |
| Q96RS0 | TGS1     | DSGNNSGDQATEEEGGYSCGTAESHDSK       | S55         | 0.84745198 | 0.97655768 | 0.93274653 |
| Q8NI27 | THOC2    | NAVASVQNGPGGGPSSSSIGSASKSDSSTEETDK | S1219       | 0.09635765 | 2.24758372 | 0.5018786  |
| Q8NI27 | THOC2    | SESPCESYPNEK                       | S1516       | 0.10713337 | 1.24789916 | 0.50975258 |
| Q8NI27 | THOC2    | IDTHPSPSHSSTVK                     | S1417       | 0.24867443 | 1.12936389 | 0.59379993 |
| Q9Y2W1 | THRAP3   | FSGEEGIEEDDESGTENREEK              | S939        | 0.05994187 | 1.1537054  | 0.45298462 |
| Q9Y2W1 | THRAP3   | GSFSDTGLGDGK                       | S379        | 0.06560046 | 1.19042189 | 0.46184181 |
| Q9Y2W1 | THRAP3   | ASAVSELSPR                         | S243        | 0.20727926 | 1.16607143 | 0.57287379 |
| Q9Y2W1 | THRAP3   | IDISPSTFR                          | S682        | 0.20957818 | 1.20968573 | 0.57442583 |
| Q9Y2W1 | THRAP3   | WAHDKFSGEEGIEEDDESGTENR            | S928        | 0.22615609 | 0.45906732 | 0.58267075 |
| Q9Y2W1 | THRAP3   | FSGEEGIEEDDESGTENR                 | S928        | 0.37499443 | 0.79372583 | 0.67596613 |
| Q9Y2W1 | THRAP3   | SPPTSGTYGSSQK                      | S320        | 0.61248084 | 0.90511727 | 0.81560563 |
| Q9Y2W1 | THRAP3   | FSGEEGIEEDDESGTENR                 | S939        | 0.84804334 | 0.96087912 | 0.93278712 |
| Q9Y2W1 | THRAP3   | SPLQSVVVR                          | S253        | 0.9389362  | 1.01001252 | 0.97418985 |
| Q13009 | TIAM1    | SNATNSSYSPTTGR                     | S358        | 0.15981269 | 0.66683692 | 0.54155013 |
| Q13009 | TIAM1    | ANSLGDLIYAK                        | S231        | 0.85729134 | 1.01477833 | 0.93829746 |
| Q7Z2Z1 | TICRR    | LHPDGSPPDVAGEK                     | S599        | 0.05099557 | 0.78000722 | 0.44612288 |
| Q7Z2Z1 | TICRR    | SVSGSPESDELQELR                    | S841        | 0.13579139 | 1.15835087 | 0.52212518 |
| Q7Z2Z1 | TICRR    | SSDPGPDIGVVEESPEK                  | S1001       | 0.14298163 | 0.83339314 | 0.5281867  |
| Q7Z2Z1 | TICRR    | SIAEVSQNLR                         | S865        | 0.18358794 | 0.8467554  | 0.55832805 |
| Q7Z2Z1 | TICRR    | IECPSPGELDQK                       | S1334       | 0.44382317 | 0.95016588 | 0.72238826 |
| Q7Z2Z1 | TICRR    | SIVCQPDAASATPGVGTADSPAAPTDSR       | S1413       | 0.84924592 | 1.04844826 | 0.9331292  |
| Q9UN51 | TIMELESS | QLLDSDEEQEEDGR                     | S1173       | 0.46427722 | 0.95746118 | 0.72954618 |
| Q9UN51 | TIMELESS | AGLASPEEEDAVGK                     | S1149       | 0.51801708 | 0.92307692 | 0.76061048 |
| Q9BVW5 | TIPIN    | AHTVEEVNTDEDQK                     | T244        | 0.70705018 | 1.02959806 | 0.86558861 |
| Q5JTD0 | TJAP1    | GSPEELPLPAFEK                      | S300        | 0.37003582 | 1.05531145 | 0.67368198 |
| Q5JTD0 | TJAP1    | KDSLTAQAEQGNLLN                    | S545        | 0.70781859 | 0.95547386 | 0.86558861 |
| Q07157 | TJP1     | SRELSAQPVQTK                       | S617        | 0.0173589  | 1.22150883 | 0.36734858 |
| Q07157 | TJP1     | SRELSAQPVQTK                       | S622        | 0.02707632 | 1.38727524 | 0.40703825 |
| Q07157 | TJP1     | EDSSGMHHENQTYPPYSPQAQPQPIHR        | S899        | 0.3182831  | 0.71155831 | 0.6389963  |
| Q07157 | TJP1     | EISQDSLAAK                         | S215        | 0.44999403 | 0.82598675 | 0.72422173 |
| Q07157 | TJP1     | LEEPTAPSTSYSPQADSLR                | S968        | 0.48721284 | 0.84588745 | 0.74374863 |
| Q07157 | TJP1     | QPYSPRRPFDNQHSQDLDSR               | S1111       | 0.51816622 | 0.89783654 | 0.76061048 |

|        |          |                                     |           |            |            |            |
|--------|----------|-------------------------------------|-----------|------------|------------|------------|
| Q07157 | TJP1     | DDISEIQSLASDHSGR                    | S300      | 0.60301625 | 0.87970595 | 0.81190752 |
| Q07157 | TJP1     | EISQDSLAAAR                         | S212      | 0.7216486  | 1.09769379 | 0.87405855 |
| Q9UDY2 | TJP2     | SFSPEER                             | S415      | 0.04476003 | 1.54289268 | 0.44293212 |
| Q9UDY2 | TJP2     | SRSWEDSPER                          | S170      | 0.06896967 | 1.54801444 | 0.4637455  |
| Q9UDY2 | TJP2     | AASSDQLRDNSSPPAFKPEPPK              | S978,S986 | 0.29150553 | 1.20030008 | 0.62236719 |
| Q9UDY2 | TJP2     | GSYGSDAEEEEYR                       | S1159     | 0.40186878 | 0.5921728  | 0.69725708 |
| Q9UDY2 | TJP2     | AYSPEYR                             | S266      | 0.42546797 | 1.06822124 | 0.7137923  |
| Q9UDY2 | TJP2     | VQVAALQASPLDQDDR                    | S130      | 0.60666106 | 1.06317805 | 0.81240705 |
| Q9UDY2 | TJP2     | GRSIDQDYER                          | S244      | 0.78500034 | 1.02815315 | 0.90637476 |
| Q9UDY2 | TJP2     | SIDQDYER                            | S244      | 0.87822357 | 1.01156677 | 0.94568481 |
| Q9UDY2 | TJP2     | DNSPPPAFKPEPPK                      | S986      | 0.92261746 | 0.99052361 | 0.96716763 |
| O95049 | TJP3     | SPEASQTDSPVESPR                     | S333      | 0.01919243 | 1.72078403 | 0.37230658 |
| O95049 | TJP3     | SSEPVQADESQSPR                      | S870      | 0.22073822 | 1.32726047 | 0.58267075 |
| O95049 | TJP3     | TISEPDEQR                           | S360      | 0.33349594 | 1.12643678 | 0.65521189 |
| Q04724 | TLE1     | DASSSPASTASSSSTSLK                  | S286      | 0.73014354 | 0.9489842  | 0.87667044 |
| Q04726 | TLE3     | DAPTSPASVASSSTPSSK                  | S286      | 0.02136647 | 1.15255732 | 0.37949754 |
| Q04726 | TLE3     | ERESSANNVSPSESRLR                   | S203      | 0.03253759 | 1.30479725 | 0.40879194 |
| Q04726 | TLE3     | ESSANNVSPSESRLR                     | S203      | 0.07515981 | 1.10310559 | 0.47168775 |
| Q969X1 | TMBIM1   | AVSDSFGGVEWDDR                      | S81       | 0.0292772  | 0.62860206 | 0.40710444 |
| Q8IU68 | TMCC8    | LLPEPGSDSPGPK                       | S656      | 0.35552203 | 1.23366575 | 0.66719841 |
| O94876 | TMCC1    | FGSADNIPNLK                         | S382      | 0.00065859 | 1.28424153 | 0.21503578 |
| O75069 | TMCC2    | FGSADNIAHLK                         | S438      | 0.1092701  | 1.31284916 | 0.51002233 |
| Q92545 | TMEM131  | RSSDPWSNSHFPHEN                     | S1871     | 0.09441877 | 0.86404548 | 0.5018786  |
| Q96A57 | TMEM230  | TNLATGIPSSK                         | S14       | 0.06823423 | 18.9363037 | 0.4637455  |
| C9J98  | TMEM238  | LQLATLEAGPGAAGAGSE                  | S175      | 0.00516011 | 0.5347294  | 0.29204389 |
| Q9H330 | TMEM245  | GESAPTLPSTSPSSPSPSTPLGR             | S330,S332 | 0.14960977 | 1.45944185 | 0.53507884 |
| Q8WWA1 | TMEM40   | RGSDPASGEVEASQLR                    | S137      | 0.34636027 | 1.15241058 | 0.66293814 |
| Q9NW97 | TMEM51   | QGEDLAHVQHPTGAGPHAQEEDSQEEEEDEEAASR | S115      | 0.35990232 | 0.73968637 | 0.67034924 |
| P82094 | TMF1     | SNTEPQSPPIASPK                      | S77       | 0.01240806 | 0.69081019 | 0.36467189 |
| P82094 | TMF1     | SVSEINSDDELSGK                      | S344      | 0.15442423 | 1.20354384 | 0.53741649 |
| P82094 | TMF1     | SATPVNCEQPDILVSTPINEGQTVLDK         | S399      | 0.26219513 | 0.55140041 | 0.60088416 |
| P42167 | TMPO     | EMFPYEASTPTGISASCR                  | S362      | 0.01707891 | 14.0117782 | 0.36731036 |
| P42167 | TMPO     | SSTPLPTISSAENR                      | S168      | 0.05617009 | 1.47703733 | 0.45298462 |
| P42167 | TMPO     | SSTPLPTISSAENR                      | T160      | 0.43105108 | 1.08449549 | 0.71568235 |
| P42167 | TMPO     | GPPDFSSDEEREPTPVLGSGAAAAGR          | T74       | 0.47762947 | 1.28555359 | 0.7386542  |
| P42167 | TMPO     | GPPDFSSDEEREPTPVLGSGAAAAGR          | T74,S66   | 0.62594568 | 1.0844366  | 0.82174981 |
| P42167 | TMPO     | GPPDFSSDEEREPTPVLGSGAAAAGR          | S66       | 0.63052802 | 1.09257842 | 0.82390229 |
| Q9H3N1 | TMX1     | SLGPSLATDK                          | S270      | 0.06413865 | 1.48659517 | 0.46076126 |
| Q9H3N1 | TMX1     | QRSLGPSLATDK                        | S270      | 0.08149328 | 1.98930098 | 0.48956669 |
| Q9H3N1 | TMX1     | VEEQEADEEDVSEEEAESK                 | S247      | 0.60696979 | 0.86849711 | 0.81248322 |
| Q9H3N1 | TMX1     | KVEEQEADEEDVSEEEAESK                | S247      | 0.74452392 | 0.95339274 | 0.88343394 |
| Q9Y320 | TMX2     | AGDNIPEEQPVASTPTTVSDGENK            | S288      | 0.04235311 | 0.67413742 | 0.44098518 |
| Q9Y320 | TMX2     | AGDNIPEEQPVASTPTTVSDGENK            | S288      | 0.53808962 | 0.93477322 | 0.77155648 |
| Q9H1E5 | TMX4     | DDSNEENKDSLVDDEEEK                  | S259      | 0.24990065 | 0.88561077 | 0.5945986  |
| P24821 | TNC      | LPVGSQCSVDLESASGEK                  | S65       | 0.00410954 | 4.25974402 | 0.29204389 |
| Q9UKES | TNIK     | QNSDPTSENPLPTR                      | S640      | 0.36232275 | 1.16623377 | 0.67098346 |
| Q9UKES | TNIK     | SEGSPVLPHEPAK                       | S769      | 0.9198246  | 1.00614251 | 0.96626315 |
| Q9C0C2 | TNKS1BP1 | TEAQDLCRASPEPPGPESSSR               | S672      | 0.08962992 | 1.76696861 | 0.4960359  |
| Q9C0C2 | TNKS1BP1 | VPSSDEEVVEEPQSR                     | S1621     | 0.10808961 | 1.22028088 | 0.51002233 |
| Q9C0C2 | TNKS1BP1 | FSEGLVQSPSQDQEK                     | S435      | 0.1202963  | 0.73410884 | 0.51002233 |
| Q9C0C2 | TNKS1BP1 | YESQEPVLAGQESLPLATR                 | S601      | 0.13954009 | 1.1636953  | 0.52649862 |
| Q9C0C2 | TNKS1BP1 | SFGTRPLSSGFSPEEAQQQDEEFK            | S983      | 0.16195107 | 0.45262858 | 0.54196083 |
| Q9C0C2 | TNKS1BP1 | SQEQADVQDWEFRK                      | S836      | 0.17201256 | 1.6576087  | 0.54671184 |
| Q9C0C2 | TNKS1BP1 | QQAGAQPSPGADLEDGEMGK                | S1073     | 0.20188514 | 1.21975925 | 0.57040595 |
| Q9C0C2 | TNKS1BP1 | SAEEGELAESK                         | S1666     | 0.23685992 | 0.84033322 | 0.58536202 |
| Q9C0C2 | TNKS1BP1 | RDSLGAAYASQDANEQDQLGK               | S893      | 0.24433642 | 0.88545296 | 0.58955069 |
| Q9C0C2 | TNKS1BP1 | RFSEGLVQSPSQDQEK                    | S429      | 0.3115142  | 1.12897311 | 0.63653708 |
| Q9C0C2 | TNKS1BP1 | VSGAGFSPPSSK                        | S1138     | 0.441118   | 0.89244851 | 0.72100919 |
| Q9C0C2 | TNKS1BP1 | EAAFSPPGQDWSR                       | S1103     | 0.48348736 | 0.84861592 | 0.74166915 |
| Q9C0C2 | TNKS1BP1 | FSEGLVQSPSQDQEK                     | S429      | 0.6577066  | 0.96239602 | 0.84030158 |
| Q9C0C2 | TNKS1BP1 | NMAPGAVCSPGESK                      | S1297     | 0.72412973 | 0.93194122 | 0.87410666 |
| Q9C0C2 | TNKS1BP1 | YSSQDADEQDWEFQK                     | S920      | 0.75207535 | 1.03981446 | 0.88774061 |
| Q9C0C2 | TNKS1BP1 | NRSAEEGELAESK                       | S1666     | 0.81525241 | 1.03731343 | 0.91990355 |
| Q9C0C2 | TNKS1BP1 | HNGSLSPGLEAR                        | S1385     | 0.90242315 | 0.98701299 | 0.95826764 |
| Q9C0C2 | TNKS1BP1 | DTQSPSTCSEGLLGWSQK                  | S712      | 0.94884337 | 0.9844898  | 0.9788835  |
| Q8NDV7 | TNRC6A   | EEEPGTWEEPPSIESIR                   | S991      | 0.66221443 | 1.06584992 | 0.84239107 |
| Q8NDV7 | TNRC6A   | QNTAWDTETSPR                        | S739      | 0.67835336 | 0.90557414 | 0.85051222 |
| Q9UPQ9 | TNRC6B   | DEEPSGWEEPPQSISR                    | S879      | 0.10942262 | 1.2006079  | 0.51002233 |
| Q68C22 | TNS3     | GVSGSPHPPDTQQPSPSK                  | S660      | 0.37374964 | 0.83015716 | 0.67584996 |
| Q96GM8 | TOE1     | AADSDDGAVSAPAAADGGVSK               | S5        | 0.03043967 | 1.24121622 | 0.40879194 |
| O75674 | TOM1L1   | EATNTTSEPSAPSQDILLDSPSR             | S323      | 0.47870204 | 1.09987966 | 0.73924977 |
| Q15388 | TOMM20   | IVSAQSLAEDDVE                       | S138      | 0.87256172 | 1.02218183 | 0.94378338 |
| Q15785 | TOMM34   | NRVPSAGDVEK                         | S186      | 0.43507677 | 0.89813995 | 0.71875302 |
| O94826 | TOMM70A  | ASPAPGSGHPEPGGAHLDMNSLDR            | S91       | 0.15888075 | 0.81550916 | 0.54012266 |
| P11387 | TOP1     | ENGFSSPPQIK                         | S112      | 0.23473148 | 1.13960014 | 0.58536202 |
| P11388 | TOP2A    | YLEESDEDDLF                         | S1525     | 0.00571285 | 0.62825989 | 0.30212542 |
| P11388 | TOP2A    | NENTEGSPQEDGVELEGLK                 | S1247     | 0.09010267 | 1.26381547 | 0.4960359  |
| P11388 | TOP2A    | VPDEEENEEEDNEK                      | S1106     | 0.15035835 | 1.21075124 | 0.53597354 |
| P11388 | TOP2A    | TDDEDVPSDASPPK                      | T1343     | 0.68805554 | 0.90024039 | 0.85503358 |
| P11388 | TOP2A    | TQMAEVLPSPR                         | S1213     | 0.88045514 | 0.96811071 | 0.94646727 |
| P11388 | TOP2A    | SVVSDLEADDVK                        | S1374     | 0.89779754 | 1.02339181 | 0.95650425 |

|        |          |                                      |           |            |            |            |
|--------|----------|--------------------------------------|-----------|------------|------------|------------|
| P11388 | TOP2A    | SVVSDLEADDVK                         | S1377     | 0.89954681 | 1.00992908 | 0.956788   |
| Q02880 | TOP2B    | SESDLEETEPVVIPR                      | S1344     | 0.00218725 | 4.29998133 | 0.29204389 |
| Q02880 | TOP2B    | VVEAVNSDSDSEFGIPK                    | S1522     | 0.04944488 | 1.594644   | 0.44612288 |
| Q02880 | TOP2B    | DEYTFSPGK                            | S1424     | 0.11415436 | 0.79713115 | 0.51002233 |
| Q02880 | TOP2B    | ASGSENEGDDYNPGR                      | S1550     | 0.13148466 | 1.65420796 | 0.51352239 |
| Q02880 | TOP2B    | VKASPITNDGEDEFVPSDGLDK               | T1403     | 0.14762397 | 1.76494674 | 0.53170891 |
| Q02880 | TOP2B    | ASGSENEGDDYNPGR                      | S1552     | 0.1838176  | 1.61292983 | 0.55837626 |
| Q02880 | TOP2B    | KASGSENEGDDYNPGR                     | S1550     | 0.2143759  | 1.15729276 | 0.5806689  |
| Q02880 | TOP2B    | ASPITNDGEDEFVPSDGLDK                 | S1400     | 0.23332551 | 1.24430199 | 0.58485477 |
| Q02880 | TOP2B    | FDSNEEDSASVFSFGLK                    | S1466     | 0.48400451 | 0.79386258 | 0.74167539 |
| Q02880 | TOP2B    | KASGSENEGDDYNPGR                     | S1552     | 0.76126345 | 1.07805625 | 0.88979561 |
| Q5JTV8 | TOR1AIP1 | DSHSSEDEASSQTDLSQTISK                | S157      | 5.31E-05   | 1.80421053 | 0.0569389  |
| Q5JTV8 | TOR1AIP1 | LQQQHSEQPPLQPSVPMTR                  | S143      | 0.26596652 | 1.70205184 | 0.60298408 |
| Q5JTV8 | TOR1AIP1 | VNFSEEGETEEDDQSSSHSVTTVK             | T220,S215 | 0.51429207 | 0.6923436  | 0.75868535 |
| Q5JTV8 | TOR1AIP1 | VNFSEEGETEEDDQSSSHSVTTVK             | S215      | 0.69400881 | 1.07200987 | 0.85860808 |
| Q5JTV8 | TOR1AIP1 | VNFSEEGETEEDDQSSSHSVTTVK             | T220      | 0.83127614 | 1.03890229 | 0.92586131 |
| Q8NFQ8 | TOR1AIP2 | EPLDPDPSPHSPDK                       | S120      | 0.64011301 | 1.06120092 | 0.83055345 |
| Q94842 | TOX4     | LSTTPSPSSLHEDGVDFRR                  | T180,S178 | 0.87436558 | 0.95873817 | 0.94412246 |
| Q12888 | TP53BP1  | NSPEDLGLSLTGDSCK                     | S500      | 0.00107075 | 1.24539007 | 0.22363976 |
| Q12888 | TP53BP1  | LMLSTSEYSQSPK                        | S525      | 0.05141014 | 1.30335522 | 0.44612288 |
| Q12888 | TP53BP1  | IDEDGENTQIEDTEPMSPLVNSK              | S552      | 0.059568   | 1.23076923 | 0.45298462 |
| Q12888 | TP53BP1  | STPFIVPSSPTEQEGR                     | S380      | 0.06309616 | 1.35840368 | 0.4594768  |
| Q12888 | TP53BP1  | HEEQSNEDIPIAEQSSK                    | S222      | 0.11659354 | 1.20428103 | 0.51002233 |
| Q12888 | TP53BP1  | SGTAETEPVEQDSSQPSLPLVR               | S831      | 0.12144938 | 1.2103145  | 0.51015063 |
| Q12888 | TP53BP1  | LITSEERSPAK                          | S1678     | 0.17505748 | 0.75063185 | 0.54881965 |
| Q12888 | TP53BP1  | SEDMPFSPK                            | S265      | 0.20174947 | 1.13224822 | 0.57040595 |
| Q12888 | TP53BP1  | ETAVPGLGIEDISPNLSPDDK                | S1430     | 0.26597841 | 0.52123728 | 0.60298408 |
| Q12888 | TP53BP1  | TSSVLGMSVESAPAVEEEK                  | T117      | 0.30082571 | 1.31389794 | 0.62791959 |
| Q12888 | TP53BP1  | NSPEDLGLSLTGDSCK                     | S507      | 0.61499852 | 1.11260583 | 0.81679095 |
| Q12888 | TP53BP1  | VDVSCPELEGVEK                        | S771      | 0.66405301 | 0.90128894 | 0.84417266 |
| Q12888 | TP53BP1  | SPEPEVLSTQEDLFDQSNK                  | S294      | 0.83632573 | 1.02036857 | 0.92778088 |
| Q12888 | TP53BP1  | GNLLHFPSSQGEEEK                      | S1068     | 0.85746228 | 1.01785714 | 0.93829746 |
| Q12888 | TP53BP1  | NGSTAVAESVASPQK                      | S1028     | 0.96769665 | 1.0043573  | 0.98510236 |
| Q13625 | TP53BP2  | NQSSDILR                             | S480      | 0.96196061 | 1.01507267 | 0.98250904 |
| Q96544 | TP53RK   | ATTPADGEEPAPEAEALAAAR                | T8        | 0.70035088 | 0.94132196 | 0.86274503 |
| Q43399 | TPD52L2  | GLLSDSMTDVPVDTGVAAR                  | T23       | 0.36097981 | 0.74848516 | 0.6705258  |
| P12270 | TPR      | AADSQNSGEGNTGAAESSFQEVSR             | S2047     | 0.56042138 | 0.81229343 | 0.78468723 |
| Q9ULW0 | TPX2     | SSDQPLTVPVSPK                        | S738      | 0.1959387  | 0.82070896 | 0.56792296 |
| Q13595 | TRA2A    | RSPSPYYSR                            | S260,S262 | 0.45931968 | 0.80016793 | 0.72770675 |
| Q9BUZ4 | TRAF4    | GLSDESSLGFGYPK                       | S426      | 0.05692021 | 0.85833613 | 0.45298462 |
| Q14545 | TRAFD1   | LDSQPQETSPELPR                       | S415      | 0.22249934 | 1.12486002 | 0.58267075 |
| Q14545 | TRAFD1   | ALPSLNTGSSSPR                        | S327      | 0.8676922  | 1.02889338 | 0.94208744 |
| Q15629 | TRAM1    | GTENGVNGTLTSNVADSPR                  | S365      | 0.18143659 | 1.2427686  | 0.55480042 |
| Q96Q05 | TRAPPC9  | FNFSFPESPGEK                         | S953      | 0.41495344 | 1.19280227 | 0.70812712 |
| Q96PN7 | TRERF1   | SNSIDGSNVTVTPGPEQTVDVPEPR            | T767,S756 | 0.04411563 | 0.89656929 | 0.44293212 |
| Q95361 | TRIM16   | ETEEQDSDSAEQDPAEGEK                  | S60       | 0.23628905 | 1.12898331 | 0.58536202 |
| Q95361 | TRIM16   | ETEEQDSDSAEQDPAEGEK                  | S62       | 0.5140775  | 1.13537977 | 0.75868535 |
| Q95361 | TRIM16   | ATAQPPAPLSPDSGSPSPDSGASPVVEEEDVGSSEK | S38       | 0.78050666 | 1.04536208 | 0.9044233  |
| Q14258 | TRIM25   | ASAPSPNAQVACDHCLK                    | S100      | 0.99546308 | 0.99910072 | 0.99546308 |
| Q13263 | TRIM28   | EEDGSLDLGDAGSTGVVAK                  | S683      | 0.22468248 | 0.57025514 | 0.58267075 |
| Q13263 | TRIM28   | SRSGEVSGLMR                          | S473      | 0.26137564 | 1.21871761 | 0.60088416 |
| Q13263 | TRIM28   | SGEGEVSGLMR                          | S473      | 0.34275785 | 1.23228347 | 0.66251458 |
| Q96LD4 | TRIM47   | GGIPASPIDPFQSR                       | S588      | 0.28417117 | 0.71019017 | 0.61816331 |
| Q15642 | TRIP10   | APSDSSLGTPSDGRPELR                   | S296      | 0.15155741 | 1.16426859 | 0.53741649 |
| Q14669 | TRIP12   | SESPPAELPSLR                         | S312      | 0.05460437 | 1.19266504 | 0.4484824  |
| Q14669 | TRIP12   | RSEPPAELPSLR                         | S312      | 0.07298838 | 1.23944637 | 0.46713103 |
| Q9H3H1 | TRIT1    | RLDSDAVNTIESQSVSPDHNK                | S443      | 0.75673482 | 1.05363366 | 0.88966056 |
| Q722T5 | TRMT1L   | YSTPTYTGGQSESHVQASSEDVTER            | S709      | 0.85470597 | 1.02937239 | 0.93683196 |
| Q9UHF7 | TRPS1    | SPQRAEADDPQDMACTPSGDSLETK            | S127      | 0.11697282 | 1.75276935 | 0.51002233 |
| Q9UHF7 | TRPS1    | SPQESTGDPGNSSSVSEK                   | S1041     | 0.57683559 | 0.92909346 | 0.7967435  |
| Q9UHF7 | TRPS1    | ATEETGQAQSQGANCPGLSPVSVASK           | S178      | 0.73248033 | 1.07954546 | 0.87875848 |
| Q9UHF7 | TRPS1    | GSNEEQVNGSPLER                       | S978      | 0.7656188  | 0.94062877 | 0.89359127 |
| Q9Y4A5 | TRRAP    | GLSVDSAQEVK                          | S2051     | 0.19078863 | 0.73994704 | 0.5651429  |
| Q9Y4A5 | TRRAP    | RGLSVDSAQEVK                         | S2051     | 0.59880931 | 1.16636303 | 0.80894423 |
| P49815 | TSC2     | SQSGTLDGESAAWSASGEDSR                | S1420     | 0.0664434  | 1.43191314 | 0.46295119 |
| P49815 | TSC2     | ADVGRLSPEVK                          | S1411     | 0.41956706 | 0.89073795 | 0.70902218 |
| Q9Y3Q8 | TSC22D4  | SPDPFGVAQAQK                         | S279      | 0.53718942 | 0.92465753 | 0.77155648 |
| Q9BSV6 | TSEN34   | LEQASGASSSQEAGSSQAAK                 | S136      | 0.73494871 | 1.08366387 | 0.87923537 |
| Q99598 | TSNAX    | DVNSSSPVMLAFK                        | S33       | 0.4291745  | 1.285502   | 0.71440502 |
| Q9UJK0 | TSR3     | GGASSSCEEEQTOGR                      | S282      | 0.42851199 | 1.14785583 | 0.7137923  |
| Q6PID6 | TTC33    | SEAPAEVTHFSPK                        | S197      | 0.17161434 | 0.82914308 | 0.54598407 |
| Q6PID6 | TTC33    | KSEAPAEVTHFSPK                       | S197      | 0.64116383 | 1.10775268 | 0.83055345 |
| Q9ULT0 | TTC7A    | RGSPSAAFTFPDTPDDFGK                  | S51       | 0.24194889 | 0.74777671 | 0.58886046 |
| Q9BQE3 | TUBA1C   | TIGGGDDSFNTFFSETGAGK                 | S48       | 0.1800625  | 0.32572355 | 0.55295852 |
| Q9BQE3 | TUBA1C   | DYEEVGADSAADGEDEGEY                  | S439      | 0.52841486 | 0.631797   | 0.76614217 |
| Q3B726 | TWISTNB  | KHSEEAFTPLK                          | S316      | 0.03885596 | 0.76277724 | 0.43108921 |
| Q3B726 | TWISTNB  | HQEVQDQDPVFGSDSSGYQSDHK              | S304      | 0.23594749 | 0.77757353 | 0.58536202 |
| Q3B726 | TWISTNB  | HQEVQDQDPVFGSDSSGYQSDHKK             | S300      | 0.37823292 | 0.84558278 | 0.67666227 |
| Q3B726 | TWISTNB  | HQEVQDQDPVFGSDSSGYQSDHKK             | S304      | 0.3959204  | 0.77206209 | 0.69247075 |
| P40222 | TXLNA    | SSPGQPEAGPEGAQERPSQAAPAVEAEGPGSSQAPR | S35       | 0.70686629 | 0.92210526 | 0.86558861 |
| P40222 | TXLNA    | RPEGPQAQAPSSPR                       | S514      | 0.71814488 | 1.06693257 | 0.87275421 |

|        |        |                                      |           |            |            |            |
|--------|--------|--------------------------------------|-----------|------------|------------|------------|
| P40222 | TXLNA  | SSPGQPEAGPEGAQERPSQAAPAVEAEGPGSSQAPR | S18       | 0.86659987 | 0.97034912 | 0.94208744 |
| P40222 | TXLNA  | RPEGPQAQAPSSPR                       | S515      | 0.95975229 | 1.00692124 | 0.98250904 |
| Q9NUQ3 | TXLNG  | NLVSPAYCTQESR                        | S105      | 0.10908751 | 0.72477772 | 0.51002233 |
| Q9NUQ3 | TXLNG  | NLVSPAYCTQESR                        | S97       | 0.21626968 | 0.86988848 | 0.581405   |
| P26368 | U2AF2  | EEHGLIRSPR                           | S79       | 0.46172461 | 1.36802705 | 0.72872974 |
| Q15042 | U2SURP | LYSILQGDSPTK                         | S485      | 0.89233156 | 1.038289   | 0.95225327 |
| Q14157 | UBAP2L | NPSDSAVHSPFTK                        | S416      | 0.09073997 | 0.79269329 | 0.49699004 |
| Q14157 | UBAP2L | RYPSSISSPQK                          | S607      | 0.18300748 | 0.88326996 | 0.55778752 |
| Q14157 | UBAP2L | STSA PQMSPGSSDNQSSSPQPAQQK           | S477      | 0.2099532  | 0.73839009 | 0.57447755 |
| Q14157 | UBAP2L | RYPSSISSPQK                          | S609      | 0.58077628 | 0.8896816  | 0.79965185 |
| Q14157 | UBAP2L | STSA PQMSPGSSDNQSSSPQPAQQK           | S470      | 0.88865623 | 1.02912621 | 0.94927317 |
| Q969T4 | UBE2E3 | QRSDDESPSTSSGSDADQR                  | S8        | 0.50293277 | 0.84214191 | 0.75222795 |
| Q9C0C9 | UBE2O  | GSSGCSEAGGAGHEEGRASPLR               | S115      | 0.01522017 | 0.83222222 | 0.36631449 |
| Q9C0C9 | UBE2O  | SIPLSIK                              | S515      | 0.17298022 | 1.32305795 | 0.54762923 |
| Q13404 | UBE2V1 | LPQPPEGQCYSN                         | S146      | 0.14133089 | 1.25514977 | 0.52770768 |
| O95155 | UBE4B  | SQSSEGVSSLSSPNSLETQSQSLSR            | S76,S101  | 0.23629018 | 0.70894232 | 0.58536202 |
| O95155 | UBE4B  | SQSMIDIGVSCCK                        | S105      | 0.48792942 | 1.05374122 | 0.74374863 |
| Q9NPG3 | UBN1   | DRICSDDEEDEEK                        | S493      | 0.40268824 | 1.06727038 | 0.69805065 |
| Q5T4S7 | UBR4   | HVTLPSPPR                            | S2719     | 0.12757534 | 1.13032132 | 0.5125107  |
| Q5T4S7 | UBR4   | TSPADHGGVSGSEGGSAVDSVAGEHSVSGR       | T2884     | 0.14863143 | 1.308298   | 0.5335371  |
| Q5T4S7 | UBR4   | ELASPVSPELR                          | S178      | 0.17932686 | 1.18760697 | 0.55295852 |
| Q5T4S7 | UBR4   | TSPADHGGVSGSEGGSAVDSVAGEHSVSGR       | S2885     | 0.21749511 | 1.310848   | 0.58142167 |
| O95071 | UBR5   | WLDGASFDNER                          | S327      | 0.57256035 | 1.13076601 | 0.79341911 |
| Q8N806 | UBR7   | VEQNSEPCAGSSSEDLQTVFK                | S263      | 0.16426724 | 1.18269699 | 0.54196083 |
| Q14CS0 | UBXN2B | LGSLTPEIVTSPSPEEEDK                  | S235      | 0.80694866 | 1.03827974 | 0.91598042 |
| P15374 | UCHL3  | FLEESVSMSPPEER                       | S130      | 0.58978263 | 0.91439996 | 0.80381866 |
| Q9HA47 | UCK1   | TFSEPGDHPGMLTSGK                     | S253      | 0.19818732 | 0.85302594 | 0.56975265 |
| Q92890 | UFD1L  | FVAFSGEGQSLR                         | S299      | 0.11243576 | 1.29733378 | 0.51002233 |
| Q92890 | UFD1L  | GVEPSPPIKPGDIK                       | S247      | 0.65286698 | 0.89120198 | 0.83782054 |
| Q96T88 | UHRF1  | ERDSELSDDTSGCCLGQSESDK               | S91       | 0.00884702 | 0.8748718  | 0.3318662  |
| Q96T88 | UHRF1  | IERPGEPSMVDNPMR                      | S287      | 0.15888915 | 1.38161838 | 0.54012266 |
| Q96T88 | UHRF1  | ERDSELSDDTSGCCLGQSESDK               | T93       | 0.46007062 | 1.36542198 | 0.72775395 |
| Q96T88 | UHRF1  | REEEEEQEGGFASPR                      | S639      | 0.96272107 | 1.009826   | 0.98250904 |
| Q96PU4 | UHRF2  | RPISDDDCPSASK                        | S667      | 0.2996895  | 1.1007155  | 0.62653702 |
| Q96RL1 | UIMC1  | VSPGMEEAGCSR                         | S653      | 0.08246323 | 1.2221472  | 0.49194574 |
| P13051 | UNG    | APAGQEEPTPPSSPLSAEQQLDR              | T60,S64   | 0.01194378 | 0.68762183 | 0.3634964  |
| P13051 | UNG    | APAGQEEPTPPSSPLSAEQQLDR              | T60,S63   | 0.08945815 | 0.64781944 | 0.4960359  |
| P13051 | UNG    | APAGQEEPTPPSSPLSAEQQLDR              | T60       | 0.1280269  | 0.76836158 | 0.5125107  |
| P13051 | UNG    | HAPSPEPAVQGTGVAGVPEESGDAAPAK         | S23       | 0.2610828  | 0.85573477 | 0.60088416 |
| P13051 | UNG    | KAPAGQEEPTPPSSPLSAEQQLDR             | T60,S64   | 0.62787253 | 1.09113436 | 0.8230644  |
| Q9HAU5 | UPF2   | ENETDEENTEVMIK                       | T1088     | 0.58554291 | 0.88819876 | 0.80108627 |
| O94763 | URI1   | SISCEEATCSDTSESILEEPPQENQK           | S440      | 0.22304612 | 0.50521296 | 0.58267075 |
| O94763 | URI1   | NSTGSGHSAQELPTIR                     | S372      | 0.31312886 | 0.93431856 | 0.63653708 |
| O94763 | URI1   | KNSTGSGHSAQELPTIR                    | S372      | 0.5390566  | 1.1278374  | 0.77185823 |
| O60763 | US01   | DLGHPVEEEDLESQDEDEDESEDPGK           | S942      | 0.57014053 | 0.69477124 | 0.7913512  |
| O94782 | USP1   | VEESSEISPEPK                         | S475      | 0.23096344 | 0.84751532 | 0.58402227 |
| O94782 | USP1   | ASEIDQVVPAAQSSPINCCK                 | S66       | 0.42293204 | 0.88503133 | 0.71209747 |
| Q14694 | USP10  | NHNSVNEEEQEQEGSEDEWEQVGR             | S576      | 0.20916    | 0.60788973 | 0.57425546 |
| P51784 | USP11  | YVTKPNSDDEDDGDEK                     | S648      | 0.12460506 | 1.16456494 | 0.5125107  |
| Q9Y4E8 | USP15  | GASAATGIPLESDSDNDNDNIENENCMHTN       | S961      | 0.6099965  | 0.86129376 | 0.81484419 |
| Q9Y4E8 | USP15  | SPGASNFTLPK                          | S229      | 0.61885114 | 1.06363636 | 0.81882617 |
| Q9UPU5 | USP24  | GGSTGGGGFDPPPAYHEVVDIAEK             | T89       | 0.03247729 | 0.70601422 | 0.40879194 |
| Q9P275 | USP36  | HSCSPMGDGDPEAMEESPR                  | S952      | 0.0876481  | 1.31505792 | 0.4960359  |
| Q9P275 | USP36  | HSCSPMGDGDPEAMEESPRK                 | S952      | 0.77343136 | 1.02709832 | 0.89913137 |
| Q53G59 | USP39  | EVEDSEPEREVR                         | S82       | 0.14607963 | 2.32040341 | 0.53170891 |
| Q9H9J4 | USP42  | DSALAEPEGLSPAPPAR                    | S856      | 0.02200417 | 1.27462341 | 0.37964331 |
| Q9H9J4 | USP42  | DAEPQPGSPAASLEEDPAAAGLSSTK           | S754      | 0.50992869 | 1.10325753 | 0.75633887 |
| Q96K76 | USP47  | ELEQHITQSDPENFQSEER                  | S933      | 0.0747041  | 1.14464232 | 0.47168775 |
| Q92738 | USP6NL | IEVLPVDTGAGGYSGNSGSPK                | S714      | 0.88028585 | 1.031473   | 0.94646727 |
| Q93009 | USP7   | AGEQQLSEPEDMEMEAGDTPDPPR             | S18       | 0.33532645 | 1.13581731 | 0.65720257 |
| P40818 | USP8   | SYSSPDITQAIQEEK                      | S716      | 0.16643284 | 0.79936432 | 0.54308896 |
| P40818 | USP8   | RSYSSPDITQAIQEEK                     | S716      | 0.46270918 | 0.89402698 | 0.72897667 |
| Q93008 | USP9X  | NGILAIEGTGSDDDDMSGDEK                | S1600     | 0.67731187 | 0.8943745  | 0.8501977  |
| Q9BVJ6 | UTP14A | DSGSQEVLSLR                          | S453      | 0.09010448 | 1.43508669 | 0.4960359  |
| Q9BVJ6 | UTP14A | SELSQDAEPAGSQETK                     | S445      | 0.42847093 | 0.80655782 | 0.7137923  |
| Q9BVJ6 | UTP14A | RSELSQDAEPAGSQETK                    | S445      | 0.50177063 | 1.11740558 | 0.75168596 |
| Q9BVJ6 | UTP14A | SELSQDAEPAGSQETK                     | S437      | 0.54170162 | 0.73460877 | 0.77202382 |
| Q9Y5J1 | UTP18  | VQEHEDSGDSEVENEAK                    | S121      | 0.0550635  | 1.79604395 | 0.45081948 |
| Q9Y5J1 | UTP18  | VQEHEDSGDSEVENEAK                    | S121,S124 | 0.51666312 | 0.72172244 | 0.75941066 |
| O75691 | UTP20  | SLSDNGQPGTDPADSGGTSK                 | T1741     | 0.47378664 | 1.0908558  | 0.73588623 |
| Q9P0L0 | VAPA   | VAHSDKPGSTSTASFR                     | S214      | 0.13031391 | 1.3884437  | 0.5125107  |
| O95292 | VAPB   | SLSSLDLDTVEK                         | S156      | 0.10563416 | 0.73007409 | 0.50572948 |
| O95292 | VAPB   | SLSSLDLDTVEK                         | S158      | 0.98304112 | 0.99566361 | 0.99133812 |
| P50552 | VASP   | SSSSVTTSETQPCTPSSSDYDLQR             | S324      | 0.37711985 | 0.83540525 | 0.67666227 |
| P52735 | VAV2   | FTSPADLDASGAGPGPK                    | S576      | 0.20338756 | 1.27638566 | 0.57104287 |
| P18206 | VCL    | SLLDASEAIK                           | S721      | 0.01519412 | 0.54076204 | 0.36631449 |
| P18206 | VCL    | DPSASPGDAGEQAIR                      | S290      | 0.08501743 | 1.21084337 | 0.49347121 |
| P21796 | VDAC1  | LTFDSSFSPTNGK                        | S104      | 0.72785556 | 1.0524379  | 0.87523758 |
| P45880 | VDAC2  | LTFDTSFSPNTGK                        | S115      | 0.58472214 | 1.12872323 | 0.80108627 |
| P08670 | VIM    | SLYASSPGGVYATR                       | S56       | 0.03688649 | 0.76716654 | 0.42804252 |
| P08670 | VIM    | DGQVINETSQHDDLE                      | S459      | 0.19186877 | 0.75902177 | 0.5651429  |

|        |         |                                 |             |            |            |            |
|--------|---------|---------------------------------|-------------|------------|------------|------------|
| Q5THJ4 | VPS13D  | DYLTPTPPSPTVDEPK                | T1761,T1767 | 0.0292008  | 1.4418594  | 0.40710444 |
| Q8IV63 | VRK3    | GLNSSFETSPK                     | S59         | 0.00192962 | 0.66925338 | 0.29204389 |
| Q7Z5K2 | WAPAL   | RPESPSEISPIK                    | S221        | 0.00124784 | 1.83004292 | 0.22363976 |
| Q7Z5K2 | WAPAL   | RPESPSEISPIK                    | S221,S226   | 0.26871367 | 0.88467902 | 0.60403212 |
| P23381 | WARS    | KL5FDQ                          | S467        | 0.45936245 | 1.15826773 | 0.72770675 |
| Q8TBZ3 | WDR20   | SNSLPHSAVSNAGSK                 | S434        | 0.22797031 | 0.90899796 | 0.58267075 |
| Q9UNX4 | WDR3    | GSSPGIQDTLEAEDGAFETDEAPEDR      | S241        | 0.23554229 | 0.37176665 | 0.58536202 |
| Q5JSH3 | WDR44   | EYVSNDAAQSDDEEK                 | S403        | 0.23217293 | 1.17910448 | 0.58402949 |
| Q5JSH3 | WDR44   | SDTDTGVCSTGDEDPDDK              | S574        | 0.35448834 | 0.82772732 | 0.66702539 |
| Q9HG52 | WDR55   | TCEERPAEDGSDDEEDPDSMEAPTR       | S14         | 0.79437021 | 0.95049505 | 0.91164649 |
| Q6PJ9  | WDR59   | EAHLSPPWGESSPEELR               | S821        | 0.12610993 | 0.85723582 | 0.5125107  |
| Q9NW82 | WDR70   | TMFAQVESDDEEAK                  | S638        | 0.5598606  | 1.03143134 | 0.78458309 |
| Q8IWA0 | WDR75   | VQDTSNTGLGEDIIHQLSK             | S796        | 0.16379933 | 0.34317056 | 0.54196083 |
| Q8N5D0 | WDTC1   | KDSISEDEMVL                     | S511        | 0.65234762 | 1.06819723 | 0.83776808 |
| O96028 | WHSC1   | IQDPTDEAAEADTPR                 | T544        | 0.13049092 | 0.70601924 | 0.5125107  |
| O95785 | WIZ     | SPQLLSRPPASP                    | S1012,S1017 | 0.91480809 | 1.00731618 | 0.96462519 |
| Q9H4A3 | WNK1    | EKPELSEPHLNGPSSDPEAAFLSR        | S2012       | 0.13771505 | 0.37818998 | 0.52409548 |
| Q9BUR4 | WRAP53  | TLETQLAPDCCPSDQPAPAHPPSPHAPMKNK | S26,S30     | 0.50128844 | 0.76615288 | 0.75168596 |
| Q96555 | WRNIP1  | QPATPTAAESSEGEEGEDDGGGETESR     | S92         | 0.01567558 | 1.48246844 | 0.36631449 |
| Q96555 | WRNIP1  | RLSESSALK                       | S75         | 0.45823098 | 1.36080786 | 0.72748678 |
| Q15007 | WTAP    | EGNTTDDFPSSPGNGNK               | S306        | 0.37549018 | 1.11143749 | 0.67596613 |
| Q9C0E2 | XPO4    | HQQQLLASPGSSTVDNK               | S521        | 0.13537566 | 0.92139571 | 0.52141517 |
| Q9UBH6 | XPR1    | YNQ5ISLR                        | S668        | 0.0571619  | 1.35276935 | 0.45298462 |
| P18887 | XRCC1   | TKPTQAAAGPSSPQKPPTEETK          | T453,S447   | 0.9228335  | 0.97777132 | 0.96716763 |
| Q9H0D6 | XRN2    | NSPGSQVASNPR                    | S448        | 0.09478388 | 1.46261682 | 0.5018786  |
| Q9H0D6 | XRN2    | AEDSDSEPEPEDNVR                 | S499        | 0.82750108 | 1.02731181 | 0.9253097  |
| Q8IY57 | YAF2    | SPPASAAASADQHSQSGSSSDNTER       | S136        | 0.60639061 | 0.93639038 | 0.81240705 |
| P46937 | YAP1    | QASTDAGTAGALTPQHVR              | S109        | 0.35522307 | 0.85927293 | 0.66702539 |
| P67809 | YBX1    | NYQQNYQNSESGEK                  | S165        | 0.0071879  | 0.30333906 | 0.31708848 |
| P67809 | YBX1    | NEGSESAPEGQAQQR                 | S174        | 0.04522578 | 0.61392241 | 0.44340907 |
| P67809 | YBX1    | AADPPAENSSAPEAQGGAE             | S314        | 0.34676016 | 1.15233582 | 0.66293814 |
| P67809 | YBX1    | NEGSESAPEGQAQQR                 | S176        | 0.65402128 | 1.0507867  | 0.8383178  |
| P67809 | YBX1    | NEGSESAPEGQAQQR                 | S174,S176   | 0.79688858 | 1.04794054 | 0.91333498 |
| P16989 | YBX3    | ENQQATSGPNQPSVR                 | S324        | 0.25695977 | 1.42830214 | 0.59892773 |
| P16989 | YBX3    | AGEAPTENPAPPTQSSAE              | S369        | 0.3185856  | 1.23631327 | 0.63900857 |
| Q9ULM3 | YEATS2  | GGHMIASVPQK                     | S627        | 0.40335011 | 0.84066261 | 0.69844738 |
| Q9ULM3 | YEATS2  | FLESPSR                         | S118        | 0.55864276 | 0.94786497 | 0.78321666 |
| Q86U90 | YRDC    | LPGSGAVQAASPER                  | S60         | 0.91505383 | 1.01399756 | 0.96462519 |
| Q96MU7 | YTHDC1  | GISPIVFDR                       | S308        | 0.6929672  | 1.05612088 | 0.85860808 |
| Q9H6S0 | YTHDC2  | SSADTEFSDECTTAER                | S1202       | 0.26419923 | 0.63636293 | 0.60276289 |
| Q9H6S0 | YTHDC2  | VDGIPNDSSDSEMEDK                | S1092       | 0.41633648 | 1.18845059 | 0.70812712 |
| Q9H6S0 | YTHDC2  | KSSADTEFSDECTTAER               | T1205       | 0.41649955 | 1.11782609 | 0.70812712 |
| Q9H6S0 | YTHDC2  | KSSADTEFSDECTTAER               | S1202       | 0.89870582 | 0.98877375 | 0.95652424 |
| P25490 | YY1     | EEVVGDDSDGLR                    | S118        | 0.22202827 | 0.76645343 | 0.58267075 |
| P86452 | ZBED6   | SESPIPVAEQGTLMR                 | S381        | 0.22988841 | 1.39392572 | 0.58267075 |
| Q9Y2K1 | ZBTB1   | KSSTVESEIASEEK                  | T306        | 0.31069045 | 0.75223825 | 0.63653708 |
| Q9Y2K1 | ZBTB1   | KSSTVESEIASEEK                  | S305        | 0.75129326 | 1.05403685 | 0.88774061 |
| Q9ULJ3 | ZBTB21  | TEPSSPLSDPSDIIR                 | S435        | 0.24795409 | 1.22776166 | 0.59295766 |
| Q9ULJ3 | ZBTB21  | IQPLEPDSPTGLSENPTPATEK          | S1003       | 0.40136462 | 1.20230106 | 0.69687959 |
| Q9NUA8 | ZBTB40  | AETEEAAHSVQSQEMSVNSPTAQESQR     | T192        | 0.2975295  | 1.17460914 | 0.62494294 |
| O95365 | ZBTB7A  | GGAPDPSPGATATPGAPQSPSPDAR       | S526        | 0.55823491 | 1.11074561 | 0.78304897 |
| Q96GY0 | ZC2HC1A | GIEGHSPGNLPK                    | S292        | 0.37881341 | 0.77888999 | 0.67666227 |
| O75152 | ZC3H11A | TVLPTVPESPEEEVK                 | S108        | 0.34016601 | 1.0945083  | 0.65987705 |
| O75152 | ZC3H11A | VQQSSESSTSSPQHEATPGAR           | S495        | 0.37431625 | 1.21598234 | 0.67596613 |
| Q5T200 | ZC3H13  | GNIETTSDEGGVFSFK                | S993        | 0.11650982 | 0.83106657 | 0.51002233 |
| Q5T200 | ZC3H13  | SLSPSHLTEDR                     | S877        | 0.66017613 | 1.04831625 | 0.84212266 |
| Q5T200 | ZC3H13  | GNIETTSDEGGVFSFK                | S993        | 0.90757202 | 1.03123569 | 0.96057327 |
| Q5T200 | ZC3H13  | GRPTSPPPPPIEDIALGK              | T263,S265   | 0.92468753 | 1.01997973 | 0.96756561 |
| Q6PJ77 | ZC3H14  | NGDECAYHHPIPSCK                 | S620        | 0.82600748 | 0.97544022 | 0.92458845 |
| Q6PJ77 | ZC3H14  | DLVQPDPKASP                     | S515        | 0.95173237 | 0.99560287 | 0.97935842 |
| Q8WU90 | ZC3H15  | AENGERSDLEEDNER                 | S381        | 0.74973023 | 0.97741148 | 0.88724495 |
| Q86VM9 | ZC3H18  | GPSQEEEDNHSDEEDRASEPK           | S67         | 0.07000746 | 1.1719191  | 0.4637455  |
| Q86VM9 | ZC3H18  | TSDLRDEASSVTR                   | S118        | 0.07709452 | 1.25920845 | 0.48171963 |
| Q86VM9 | ZC3H18  | DSGSDQDLGAGVRASDLEDEESAAR       | S46         | 0.15282623 | 0.87423935 | 0.53741649 |
| Q86VM9 | ZC3H18  | LGVSVPSPR                       | S534        | 0.25833446 | 1.25264055 | 0.5989986  |
| Q86VM9 | ZC3H18  | ASDLEDEESAAR                    | S46         | 0.58367894 | 0.95092025 | 0.80091377 |
| Q86VM9 | ZC3H18  | GPTSSPCEEEDGEGEEDR              | S95         | 0.78578576 | 1.09565217 | 0.90663264 |
| Q86VM9 | ZC3H18  | SQDQDSEVNELSR                   | S78         | 0.85452246 | 0.97687456 | 0.93683196 |
| Q8IXZ2 | ZC3H3   | DHASQLSPVLSR                    | S408        | 0.89864711 | 1.024112   | 0.95652424 |
| Q9UP78 | ZC3H4   | TGSGSPFAGNSPAR                  | S1269,S1275 | 0.49562595 | 0.84968512 | 0.74968842 |
| Q7Z2W4 | ZC3HAV1 | ASLEDAPVDLDR                    | S284        | 0.11203038 | 0.7943564  | 0.51002233 |
| Q86WB0 | ZC3HC1  | SWDSSSPVDRPEPEAASPTR            | S359,S370   | 0.0471152  | 0.82645685 | 0.44612288 |
| Q86WB0 | ZC3HC1  | SWDSSSPVDRPEPEAASPTR            | T372        | 0.25580533 | 1.13007614 | 0.59776597 |
| Q86WB0 | ZC3HC1  | SQDATFSPGSEQAEK                 | S335        | 0.53181863 | 0.94040968 | 0.76797086 |
| Q86WB0 | ZC3HC1  | SMGTGDTPLGLEVPSSPLR             | S395        | 0.58532093 | 0.82474067 | 0.80108627 |
| Q6NZY4 | ZCCHC8  | SEAGHASSPDSEVTSLCQK             | S597        | 0.07966994 | 1.1127451  | 0.48728698 |
| Q6NZY4 | ZCCHC8  | SEAGHASSPDSEVTSLCQK             | S598        | 0.20070648 | 1.10550997 | 0.56975265 |
| Q9NUE0 | ZDHHC18 | DCEYQISPGAALPASPGAR             | S19         | 0.33560431 | 0.85670732 | 0.65720257 |
| Q9C0B5 | ZDHHC5  | GVGSPPEPGPTAPYLGR               | S621        | 0.19410573 | 0.85564854 | 0.56554204 |
| Q9C0B5 | ZDHHC5  | GD5LKEP5T5IAESSR                | S380        | 0.3158403  | 1.34749035 | 0.63800725 |
| O76080 | ZFAND5  | MSPMGTAGSNSPTSASVQR             | S48         | 0.56480417 | 1.17723713 | 0.78808749 |

|        |         |                                      |           |            |            |            |
|--------|---------|--------------------------------------|-----------|------------|------------|------------|
| O60293 | ZFC3H1  | RISTSILSEK                           | S352      | 0.57747116 | 1.05190989 | 0.7967435  |
| Q96KR1 | ZFR     | RDSGDVDGFEAEGK                       | S1054     | 0.14934879 | 0.8253128  | 0.53498933 |
| Q96KR1 | ZFR     | DSGDVDGFEAEGK                        | S1054     | 0.22965654 | 0.88035252 | 0.58267075 |
| Q7Z3T8 | ZFYVE16 | NEIIQSPISQVPSVEK                     | S939      | 0.17874171 | 0.72131912 | 0.55295852 |
| Q96K21 | ZFYVE19 | LPDSDDDDEEETAIR                      | S354      | 0.1865917  | 0.85707011 | 0.55994868 |
| Q9UKY1 | ZHX1    | EAGETSPADESAPK                       | S648      | 0.19765383 | 1.2900008  | 0.56896197 |
| Q14202 | ZMYM3   | TGSPGPELLFHGQQK                      | S464      | 0.95161661 | 1.00961539 | 0.97935842 |
| Q5VZL5 | ZMYM4   | RVTQHESDNENEIQQNK                    | S122      | 0.19459134 | 1.75930603 | 0.56554204 |
| Q5VZL5 | ZMYM4   | SIVAVEPR                             | S1181     | 0.42842033 | 0.87735657 | 0.7137923  |
| Q5VZL5 | ZMYM4   | VTQHESDNENEIQQNK                     | S122      | 0.88986167 | 1.0093361  | 0.95024619 |
| Q9ULU4 | ZMYND8  | SPMSTNSSVHTGSDVEQDAEK                | S444      | 0.00656103 | 1.38449662 | 0.31708848 |
| Q9ULU4 | ZMYND8  | RISLSDMPR                            | S425      | 0.46595285 | 0.87780262 | 0.73040295 |
| Q9ULU4 | ZMYND8  | LNFDMTASPK                           | S406      | 0.88393288 | 1.02209945 | 0.94767945 |
| Q9H2Y7 | ZNF106  | ENSPSSQASAGLSSINK                    | S1281     | 0.03502158 | 0.73876206 | 0.42085354 |
| Q9H2Y7 | ZNF106  | EPHSPADQPEQQAESTLTAETR               | S1328     | 0.11060079 | 0.82642613 | 0.51002233 |
| Q9H2Y7 | ZNF106  | SPLLPCATK                            | S452      | 0.16064106 | 0.74300099 | 0.54196083 |
| Q9H2Y7 | ZNF106  | GNSGSEACTSSFLR                       | S1302     | 0.16911315 | 0.84572233 | 0.54531589 |
| Q9H2Y7 | ZNF106  | SLSSESVIMDR                          | S861      | 0.43731199 | 0.91304417 | 0.71982749 |
| Q9H2Y7 | ZNF106  | ELSTSPCNPIVR                         | S641      | 0.66015773 | 0.9309754  | 0.84212266 |
| Q9UQR1 | ZNF148  | GLLSTSEEDSGFSTSPK                    | S306      | 0.40496139 | 1.05745721 | 0.6993632  |
| O15231 | ZNF185  | GGQGDPAVPAQPADPSTPERQSSPSGSEQLVR     | S446,S455 | 0.08850758 | 2.62878732 | 0.4960359  |
| O15231 | ZNF185  | ESCGSSVLTDFEGK                       | S465      | 0.16719019 | 0.88673007 | 0.54315766 |
| O15231 | ZNF185  | RSSTSGDTEEEEEVVPFSSDEQK              | T158,S155 | 0.20264919 | 0.3905175  | 0.57092431 |
| O15231 | ZNF185  | GGQGDPAVPTQQPADPSTPEQQNSPSGSEQFVR    | S519      | 0.21675333 | 1.23732041 | 0.58142167 |
| O15231 | ZNF185  | GGQGDPAVPTQQPADPSTPEQQNSPSGSEQFVR    | T513      | 0.2923915  | 1.24151104 | 0.62260296 |
| O15231 | ZNF185  | RSSTSGDTEEEEEVVPFSSDEQK              | T154      | 0.35817069 | 1.08881897 | 0.66983109 |
| O15231 | ZNF185  | QSSPSGSEQLVR                         | S453      | 0.45638018 | 1.09947644 | 0.72561974 |
| O15231 | ZNF185  | GGQGDPAVPTQQPADPSTPEQQNSPSGSEQFVR    | T513,S519 | 0.48807063 | 1.05425401 | 0.74374863 |
| O15231 | ZNF185  | GGQGDPAVPAQPADPSTPER                 | T447      | 0.72297592 | 1.02194587 | 0.87410666 |
| O15231 | ZNF185  | SSTSGDTEEEEEVVPFSSDEQK               | S155      | 0.7361484  | 1.02545455 | 0.87923537 |
| O15231 | ZNF185  | RESCGSSVLTDFEGK                      | S465      | 0.98082092 | 0.99775449 | 0.99052277 |
| O75362 | ZNF217  | AGAESPMSVDGR                         | S407      | 0.06440959 | 1.37403846 | 0.46076126 |
| Q8ND82 | ZNF280C | SEPHSPGIPEFR                         | S80       | 0.97546477 | 0.99395944 | 0.98795929 |
| Q5VUA4 | ZNF318  | SPGLCSDSLEK                          | S136      | 0.13093579 | 0.91935484 | 0.5125107  |
| Q5VUA4 | ZNF318  | IPSPNLIK                             | S2101     | 0.3460475  | 1.24064681 | 0.66293814 |
| Q5VUA4 | ZNF318  | LCSPLEPGDPSK                         | S2189     | 0.79899875 | 0.95832467 | 0.91398245 |
| Q5VUA4 | ZNF318  | SFPDIEDEEK                           | S527      | 0.99467221 | 1.00097087 | 0.99524397 |
| Q5BKZ1 | ZNF326  | GENPFQIDHSQDQJEGDEEDEEK              | S478      | 0.79101391 | 0.94282946 | 0.90941229 |
| Q9NWS9 | ZNF446  | TEEPLGSPHSGTVESPGEGPQDTR             | S137      | 0.23752518 | 1.20154423 | 0.58537527 |
| Q96JM2 | ZNF462  | VSPVPLSGAAAGTEQK                     | S2172     | 0.28533767 | 1.19986368 | 0.61903114 |
| Q8TCN5 | ZNF507  | LSPTSNTSYSLEK                        | S884      | 0.18598329 | 0.78734526 | 0.55994868 |
| Q8TCN5 | ZNF507  | AQQCVSPSSSLCR                        | S197      | 0.74781926 | 0.94014449 | 0.88634115 |
| Q8NB15 | ZNF511  | SRSPASAEAPGDSGER                     | S183      | 0.33734793 | 1.11501468 | 0.65781985 |
| Q8NB15 | ZNF511  | SPASAEAPGDSGERSEGEAMEICSEVAASPAPAGER | S199      | 0.88281507 | 0.9498778  | 0.94748969 |
| Q96KM6 | ZNF512B | SEHTAPPPEPTDKSPEAEDPLGVER            | S665      | 0.00957691 | 1.21654676 | 0.33581626 |
| Q96KM6 | ZNF512B | SEHTAPPPEPTDKSPEAEDPLGVER            | T662      | 0.02405115 | 1.22261072 | 0.39586233 |
| Q96KM6 | ZNF512B | SPEAEDPLGVER                         | S665      | 0.64358133 | 0.90088527 | 0.83080967 |
| Q9HCE3 | ZNF532  | AADKSPESQNLIDGTK                     | S314      | 0.27538853 | 1.46891999 | 0.60849547 |
| Q7Z340 | ZNF551  | DILPAAEHQTTSPVQK                     | S126      | 0.26197777 | 0.86370735 | 0.60088416 |
| Q8NAF0 | ZNF579  | ESESEEAAGAAELR                       | S194      | 0.39417771 | 0.82608639 | 0.69109635 |
| Q92610 | ZNF592  | LLGPAPEDDGGHNDHSQPQASQDQDQSHLSPQV    | S1264     | 0.96995933 | 1.00497999 | 0.98671573 |
| O15014 | ZNF609  | FCDSPTSLEMR                          | S358      | 0.12094454 | 1.24422286 | 0.51002233 |
| O15014 | ZNF609  | LVEPHSPSPSSK                         | S576      | 0.46779275 | 1.12576028 | 0.73186198 |
| O15014 | ZNF609  | TNSMGSATGPLPGTK                      | S467      | 0.91089299 | 1.01657941 | 0.96250926 |
| Q8N1G0 | ZNF687  | QESCPHHPQVLAQQGSGSSPK                | S227,S241 | 0.01023834 | 1.15873016 | 0.34797246 |
| Q8N1G0 | ZNF687  | TQSSLVEAFNK                          | S495      | 0.05690956 | 1.65066431 | 0.45298462 |
| Q8N1G0 | ZNF687  | HGLQLGAQSPGR                         | S1057     | 0.35431811 | 1.10348977 | 0.66702539 |
| Q8N1G0 | ZNF687  | AVVLPGGTATSPK                        | T432      | 0.5990808  | 1.13451605 | 0.80897223 |
| Q9H5H4 | ZNF768  | YEPQSPGYEPR                          | S125      | 0.16652342 | 1.19458304 | 0.54308896 |
| Q9H5H4 | ZNF768  | FEPESPGFESR                          | S83       | 0.20488139 | 1.21146398 | 0.57194083 |
| Q9H5H4 | ZNF768  | SPGLVPPSPPEFAPR                      | S90,S97   | 0.62637408 | 1.03658869 | 0.82174981 |
| Q17R98 | ZNF827  | TTTSPFFSEDTFR                        | S760      | 0.41546614 | 0.90015775 | 0.70812712 |
| P51523 | ZNF84   | SNSEGLDLGLILK                        | S128      | 0.17929781 | 1.15599069 | 0.55295852 |
| O95218 | ZRANB2  | YNLDASEEEDSNKK                       | S188      | 0.05973396 | 1.19775596 | 0.45298462 |
| O95218 | ZRANB2  | LDEDEDDADLSK                         | S181      | 0.06913608 | 0.72208202 | 0.4637455  |
| O95218 | ZRANB2  | YNLDASEEEDSNK                        | S188      | 0.12871802 | 1.06263858 | 0.5125107  |
| O95218 | ZRANB2  | EESDGEYDEFGR                         | S120      | 0.25966911 | 0.68453313 | 0.59994392 |
| O95218 | ZRANB2  | ENVEYIEREESDGEYDEFGR                 | S120      | 0.28304291 | 0.35832106 | 0.61775486 |
| O95218 | ZRANB2  | EVEDKESEGEEDDEDLSK                   | S153      | 0.70778184 | 0.9210573  | 0.86558861 |
| O95218 | ZRANB2  | EESDGEYDEFGRK                        | S120      | 0.75938046 | 0.95595432 | 0.88966056 |
| Q15696 | ZRSR2   | DIYLSPR                              | S349      | 0.15246732 | 1.13601497 | 0.53741649 |
| Q8IYW8 | ZSCAN29 | ARSPDLGPQEQMNP                       | S153      | 0.22201901 | 1.18278539 | 0.58267075 |
| Q15942 | ZYX     | FSPGAPGGSGSQPNQK                     | S281      | 0.29892783 | 0.85847666 | 0.62631205 |
| Q15942 | ZYX     | SPGAPGPLTLK                          | S344      | 0.46618093 | 0.9141256  | 0.73040295 |
| O43149 | ZZEF1   | GDREEEVERPVSSPGDPEQK                 | S2444     | 0.0931097  | 1.18298418 | 0.5018786  |
| Q8IYH5 | ZZZ3    | QTEPVSPVLK                           | S113      | 0.20130151 | 0.82540213 | 0.57014809 |
| Q8IYH5 | ZZZ3    | RQTEPVSPVLK                          | S113      | 0.45373209 | 0.9039237  | 0.72537341 |
