# Supplementary material
Source: PubMed Central journal article supplement (PMC7656239)
Supplement: NIHMS1638547-supplement-Table_S3.pdf [file NIHMS1638547-supplement-Table_S3.pdf]

| Title (mzid) | Raw and MGF name                     | Cell Line | Treatment      | Biological Rep # | Technical Rep # | %FDR* |
|--------------|--------------------------------------|-----------|----------------|------------------|-----------------|-------|
| F046973      | C1_A_H358 CAP-40-2156.mgf            | H358      | DMSO (Control) | 1                | 1               | 1.05  |
| F046974      | C1_B_H358 CAP-40-2158.mgf            | H358      | DMSO (Control) | 1                | 2               | 1.01  |
| F046978      | C2_A_H358 CAP-40-2161.mgf            | H358      | DMSO (Control) | 2                | 1               | 1.02  |
| F046979      | C2_B_H358 CAP-40-2164.mgf            | H358      | DMSO (Control) | 2                | 2               | 0.85  |
| F046983      | C3_A_H358 CAP-40-2173.mgf            | H358      | DMSO (Control) | 3                | 1               | 1.07  |
| F046984      | C3_B_H358 CAP-40-2177.mgf            | H358      | DMSO (Control) | 3                | 2               | 1.07  |
| F046985      | D1_A_H358 CAP-40-2180.mgf            | H358      | 20uM SMAP      | 1                | 1               | 1     |
| F046986      | D1_B_H358 CAP-40-2183.mgf            | H358      | 20uM SMAP      | 1                | 2               | 1     |
| F046987      | D2_A_H358 CAP-40-2186.mgf            | H358      | 20uM SMAP      | 2                | 1               | 0.85  |
| F046988      | D2_B_H358 CAP-40-2189.mgf            | H358      | 20uM SMAP      | 2                | 2               | 1.15  |
| F046989      | D3_A_H358 CAP-40-2192.mgf            | H358      | 20uM SMAP      | 3                | 1               | 1.19  |
| F046990      | D3_B_H358 CAP-40-2195.mgf            | H358      | 20uM SMAP      | 3                | 2               | 1.05  |
| F046991      | Narla_794_A549_C1_1_073013.raw.mgf   | A549      | DMSO (Control) | 1                | 1               | 1.52  |
| F046992      | Narla_794_A549_C1_2_073013.raw.mgf   | A549      | DMSO (Control) | 1                | 2               | 1.34  |
| F046993      | Narla_794_A549_C2_1_073013.raw.mgf   | A549      | DMSO (Control) | 2                | 1               | 1.41  |
| F046994      | Narla_794_A549_C2_2_073013.raw.mgf   | A549      | DMSO (Control) | 2                | 2               | 1.42  |
| F046995      | Narla_794_A549_C3_1_073013.raw.mgf   | A549      | DMSO (Control) | 3                | 1               | 1.52  |
| F046996      | Narla_794_A549_C3_2_073013.raw.mgf   | A549      | DMSO (Control) | 3                | 2               | 2.12  |
| F046997      | Narla_794_A549_D1_1_073013.raw.mgf   | A549      | 20uM SMAP      | 1                | 1               | 1.65  |
| F046998      | Narla_794_A549_D1_2_073013.raw.mgf   | A549      | 20uM SMAP      | 1                | 2               | 1.46  |
| F046999      | Narla_794_A549_D2_1_073013.raw.mgf   | A549      | 20uM SMAP      | 2                | 1               | 1.82  |
| F047001      | Narla_794_A549_D2_2_073013_b.raw.mgf | A549      | 20uM SMAP      | 2                | 2               | 1.3   |
| F047002      | Narla_794_A549_D3_1_073013.raw.mgf   | A549      | 20uM SMAP      | 3                | 1               | 1.45  |
| F047003      | Narla_794_A549_D3_2_073013.raw.mgf   | A549      | 20uM SMAP      | 3                | 2               | 1.38  |

\*FDR calculated against decoy searches
